# Supplementary material for: Genome Comparisons between Botrytis fabae and the Closely Related Gray Mold Fungus Botrytis cinerea Reveal Possible Explanations for Their Contrasting Host Ranges
Source: MDPI journal article supplement (doi:10.3390/jof10030216), 2024-03-14
Supplement: s1 [file s1]

**Table S6.** Results of low-resolution genome sequencing of *Botrytis* spp.

| <i>Botrytis</i> species | <i>B. fabae</i>   |        |           | <i>B. pseudo-cinerea</i> | <i>B. calthae</i> |
|-------------------------|-------------------|--------|-----------|--------------------------|-------------------|
| Strain                  | Bf611             | Bf612  | 11002     | VD110                    | MUCL1089          |
| Coverage (assemblies)   | 27x               | 45x    | 29.3x     | 29.0x                    | 27.6x             |
| N50 scaffolds (kb)      | 24.0              | 24.1   | 98.0      | 171.5                    | 150.2             |
| Assembly size (Mb)      | 41.0              | 40.6   | 40.79     | 40.61                    | 44.03             |
| No of predicted genes   | 11,258            | 11,433 | 11,743    | 11,703                   | 11,791            |
| GC content (total) CL   | 41.0%             | 40.6%  | 42.8%     | 42.7%                    | 41.3%             |
| Median intron length    | n.d.              | n.d.   | 59 nt     | 59 nt                    | 59 nt             |
| Reference               | Lee et al. (2020) |        | This work |                          |                   |
