# Supplementary material for: Genome Comparisons between Botrytis fabae and the Closely Related Gray Mold Fungus Botrytis cinerea Reveal Possible Explanations for Their Contrasting Host Ranges
Source: MDPI journal article supplement (doi:10.3390/jof10030216), 2024-03-14
Supplement: s1 [file s1]

**Table S9.** Expression levels of strain-specific genes in BfabG12 and BcB0510.

|                              | Strain  | All genes    | Specific genes | Truncated in BfabG12 | Truncated in BcB0510 |
|------------------------------|---------|--------------|----------------|----------------------|----------------------|
| Median RPKM values           | BfabG12 | 20.00        | 1.15           | 1.00                 | 2.09                 |
|                              | BcB0510 | 16.83        | 1.68           | 1.85                 | 0.91                 |
| Expressed genes <sup>a</sup> | BfabG12 | 8962 (78.7%) | 52 (35.9%)     | 125 (31.2%)          | 35 (48.6%)           |
|                              | BcB0510 | 9032 (77.2%) | 226 (48,0%)    | 192 (47.9%)          | 23 (31.9%)           |

<sup>a</sup> RPKM values  $\geq 2$
