# Supplementary material for: Genome Comparisons between Botrytis fabae and the Closely Related Gray Mold Fungus Botrytis cinerea Reveal Possible Explanations for Their Contrasting Host Ranges
Source: MDPI journal article supplement (doi:10.3390/jof10030216), 2024-03-14
Supplement: s1 [file s1]

**Table S1.** Inversions in *B. fabae* G12 relative to *B. cinerea* B05.10.

| No | Position in BfabG12            | Size [bp]         | % GC              | Next to BfabG12 gene deletion |
|----|--------------------------------|-------------------|-------------------|-------------------------------|
| 1  | 1:31126-501811                 | 470685            | 42,3              | Bcin01g01340-01420            |
| 2  | 1:674783-679128                | 4345              | 19,9 <sup>c</sup> | no                            |
| 3  | 2:1060476-1062046              | 1570              | 41,8              | no                            |
| 4  | 2:1602844-1609648              | 6804 <sup>b</sup> | 42,9              | no                            |
| 5  | 3:2060364-2087964              | 27600             | 43,5              | no                            |
| 6  | 3:2088517-2105387              | 16870             | 42,3              | no                            |
| 7  | 3:2105686-2141552              | 35866             | 44,6              | no                            |
| 8  | 3:3422717-3430397              | 7680              | 33,3              | Bcin03g09310                  |
| 9  | 4:2482932-2603674              | 120742            | 20,6              | no                            |
| 10 | 6:21432-144240                 | 122808            | 28,3              | Bcin06g00010-00040; 00210     |
| 11 | 6:589577-610883                | 21306             | 42,8              | Bcin06g01480; 01540-01560     |
| 12 | 6:1030079-1151491              | 121412            | 42,0              | no                            |
| 13 | 7:379052-380108                | 1056              | 40,1              | Bfab07g01020 (trunc.)         |
| 14 | 7:2453601-2454672              | 1071              | 42,3              | no                            |
| 15 | 8:268085-268377                | 292               | 42,7              | no                            |
| 16 | 8:958906-1077804               | 118898            | 44,2              | Bfab08g02180, 02200           |
| 17 | 8:1936595-1938531              | 1936              | 42,5              | no                            |
| 18 | 9:2232229-2275285 <sup>a</sup> | 43056             | 31,3              | Bfab09g05720, 05730           |
| 19 | 10:90080-90290                 | 210               | 42,6              | no                            |
| 20 | 10:735145-741787               | 6642              | 40,7              | no                            |
| 21 | 11:229923-231363               | 1440              | 21,4              | no                            |
| 22 | 11:760537-761268               | 731               | 42,2              | no                            |
| 23 | 11:2115491-2115713             | 222               | 43,6              | no                            |
| 24 | 13:89320-106994                | 17674             | 23,1              | no                            |
| 25 | 14:332075-333371               | 1296              | 42,6              | Bfab14g00870, 00880 (trunc.)  |
| 26 | 14:366707-384935               | 18228             | 41,8              | no                            |
| 1  | 14:722086-728926 <sup>b</sup>  | 6840              | 42,6              | no                            |
| 28 | 15:1867072-1875953             | 8881              | 38,1              | no                            |
| 29 | 16:5278-8957                   | 3679              | 34,3              | no                            |
| 30 | 16:455713-457407               | 1694              | 43,5              | no                            |

<sup>a</sup> Many smaller inversions<sup>b</sup> Contains two retrotransposon-derived genes<sup>c</sup> Numbers in red indicate the presence of AT-rich regions
