# Supplementary material for: Genome Comparisons between Botrytis fabae and the Closely Related Gray Mold Fungus Botrytis cinerea Reveal Possible Explanations for Their Contrasting Host Ranges
Source: MDPI journal article supplement (doi:10.3390/jof10030216), 2024-03-14
Supplement: s1 [file s1]

**Table S2.** Occurrence of TE remnants in AT-rich regions.

|                             | BfabG12 | BcB0510 |
|-----------------------------|---------|---------|
| Total no of AT regions      | 483     | 281     |
| AT regions with TE remnants | 358     | 152     |
| AT regions with Ty1-RE      | 167     | 36      |
| AT regions with Ty3-RE      | 136     | 64      |
| AT regions with LINE-RE     | 0       | 5       |
| AT regions with TIR-Flipper | 178     | 79      |
| AT regions with TIR-Mariner | 4       | 6       |
