# Supplementary material for: Genome Comparisons between Botrytis fabae and the Closely Related Gray Mold Fungus Botrytis cinerea Reveal Possible Explanations for Their Contrasting Host Ranges
Source: MDPI journal article supplement (doi:10.3390/jof10030216), 2024-03-14
Supplement: s1 [file s1]

**Table S10.** Non-canonical introns in *B. fabae* G12 genes.

| Gene           | Predicted function                   | Position      | 5' border                       | 3' border                 | Same in BcB0510? |
|----------------|--------------------------------------|---------------|---------------------------------|---------------------------|------------------|
| Bfab01g03590.2 | Unknown                              | 1:1217963     | Canonical                       | AAT                       | Yes              |
| Bfab01g05920.1 | Synaptojanin 2 (endocytosis)         | 1:2081354     | GAAAGT                          | Canonical                 | Yes              |
| Bfab01g10140.1 | Flavin nucleotide binding protein    | 1:3568200     | Canonical                       | CGG                       | No               |
| Bfab02g03620.1 | GAL4-like transcription factor       | 2:1334384-436 | ATAAGT                          | TAC                       | Yes              |
| Bfab02g04040.1 | Unknown                              | 2:1465304-54  | GAGTGA or TGAGTG <sup>a</sup>   | TAT or TTA <sup>a</sup>   | Yes              |
| Bfab02g06250.2 | Tubulin binding cofactor C           | 2:2370651-703 | ACAGGG (or CAGGGG) <sup>a</sup> | TCG (or CGA) <sup>a</sup> | Yes              |
| Bfab03g01840.1 | Unknown                              | 3:687271      | Canonical                       | TCG                       | No               |
| Bfab03g06466.1 | MFS multidrug transporter            | 3:2326885     | Canonical                       | TGG                       | ---              |
| Bfab04g00640.1 | Polyketide synthase                  | 4:309099      | GGTAAG                          | Canonical                 | No               |
| Bfab04g04620.1 | WD40 domain protein                  | 4:1652470-517 | ATAAGT (or TAAGTT) <sup>a</sup> | CAC (or ACA) <sup>a</sup> | Yes              |
| Bfab04g05830.1 | Unknown                              | 4:2076054-105 | ATATGT                          | TAC                       | Yes              |
| Bfab04g05860.1 | Acid phosphatase                     | 4:2082338     | Canonical                       | CCC                       | No               |
| Bfab07g05890.1 | CTP synthase                         | 7:2264270-326 | ATATGT                          | AAC                       | Yes              |
| Bfab09g06160.1 | Vacuolar ATP synthase subunit E      | 9:2488010-65  | ATACGT (or TACGTC) <sup>a</sup> | AAC (or ACA) <sup>a</sup> | Yes              |
| Bfab15g03830.1 | Unknown                              | 15:1371490    | Canonical                       | TAT                       | Yes              |
| Bfab16g05090.1 | Signal transduction histidine kinase | 16:2108435    | Canonical                       | CGG                       | Yes              |

<sup>a</sup> Cannot be distinguished by comparison of RNAseq reads and BfabG12 or BcB0510 genomic DNA
