# Supplementary material for: Genome Comparisons between Botrytis fabae and the Closely Related Gray Mold Fungus Botrytis cinerea Reveal Possible Explanations for Their Contrasting Host Ranges
Source: MDPI journal article supplement (doi:10.3390/jof10030216), 2024-03-14
Supplement: s1 [file s1]

**Table S13.** Primers used in this study.

| Name          | Sequence (5' – 3')        | Gene, purpose                                            |
|---------------|---------------------------|----------------------------------------------------------|
| pNAH_fw       | GATGGCCCTTCCCATTAC        | GFP-hyg-expressing construct,<br>amplified from pNAH-OGG |
| pNAH_rev      | AGATGCTGCTGGCAAGGTTAC     |                                                          |
| PZChr7Gap-F   | GTATCTGAAAGGGAGGAGGATGTC  | Gap closure in Bfab7                                     |
| PZChr7Gap-R   | CAAACCTGGCCACATTCAAACAAG  |                                                          |
| PZChr7Gap1-F  | TGAAGTCTGTTACGAGAGTG      | Gap closure in Bfab7                                     |
| PZChr7Gap1-R  | GCTTTTCTCTCATCCAATCA      |                                                          |
| PZ040         | AGAGCTGATTTGAAGACATGC     | Gap closure in Bfab7                                     |
| PZChr12Gap1F  | GAAACGAAGCTCTAGCCATCAATC  | Gap closure in Bfab12                                    |
| PZChr12Gap1R  | AGGGTTATGAAGACTCACTCCAAC  |                                                          |
| PZChr12Gap2F  | TTATCTTCTCGAGCTCGTTACTG   | Gap closure in Bfab12                                    |
| PZChr12Gap2R  | GGTACACTCAAGTCAAGTTGTTTCG |                                                          |
| PZChr12Gap3F  | CTCGAAGCTTTCAATCCTCGAATC  | Gap closure in Bfab12                                    |
| PZChr12Gap3R  | GTCGTCTAGTCGTTTGTCCAATC   |                                                          |
| PZChr12Gap4F  | CAGTACGAAGCGAAGTGTGTGG    | Gap closure in Bfab12                                    |
| PZChr12Gap4R  | GATACCATGAATGATGTACACG    |                                                          |
| PZChr12Gap5F  | GGCATTCTGTGCTCAACGCGAG    | Gap closure in Bfab12                                    |
| PZChr12Gap5R  | TTGAAACTTATATTTCTAATC     |                                                          |
| PZChr12Gap6F  | ACAGCGGTAAGTTTGCCGCAC     | Gap closure in Bfab12                                    |
| PZChr12Gap6R  | CACCCTCAAGCGGGCTCGGAC     |                                                          |
| PZChr12Gap7F  | ATACGTGGGGGATGGATGTGG     | Gap closure in Bfab12                                    |
| PZChr12Gap7R  | GATGGATGACGCATTGATTGA     |                                                          |
| PZChr12Gap8F  | TCAAGTTCATTGTCAGTGTC      | Gap closure in Bfab12                                    |
| PZChr12Gap8R  | GTATACGACTCATCGCTTTTC     |                                                          |
| PZChr12Gap9F  | TGACTGTGCCACAACGGCAT      | Gap closure in Bfab12                                    |
| PZChr12Gap9R  | CTTGATCTTCTCCTACGTTC      |                                                          |
| PZChr12Gap10F | TTCTGGACCCAGTTCGTTCC      | Gap closure in Bfab12                                    |
| PZChr12Gap10R | TGCGCGATGGGGAGTGCAGC      |                                                          |
