# Supplementary material for: Genome Comparisons between Botrytis fabae and the Closely Related Gray Mold Fungus Botrytis cinerea Reveal Possible Explanations for Their Contrasting Host Ranges
Source: MDPI journal article supplement (doi:10.3390/jof10030216), 2024-03-14
Supplement: s1 [file s1]

**Table S3.** Location of intact TE/RE-derived genes in BfabG12.

| Type of TE    | Coordinates        | Gene ID        | Size (aa) | Terminal repeats | close to AT-region? |
|---------------|--------------------|----------------|-----------|------------------|---------------------|
| Boty          | 2:1603508-1608944  | Bfab02g04286   | 1622      | 584 bp LTR       | within AT-region    |
| Boty          | 6:1361857-1368515  | Bfab06g03515   | 1622      | 584 bp LTR       | next to AT-region   |
| Boty          | 8:46656-53314      | Bfab08g00115   | 1622      | 584 bp LTR       | next to AT-region   |
| Boty          | 9:301433-306869    | Bfab09g00886   | 1622      | 584 bp LTR       | no                  |
| Boty          | 14:722822-728258   | Bfab14g01776   | 1622      | 584 bp LTR       | within AT-region    |
| Ty1-Copia     | 8:786449-779660    | Bfab08g01765   | 1672      | 184 bp LTR       | within AT-region    |
| TIR-Flipper-1 | 5:1777875-1776014  | Bfab05g04885   | 572       | 44 bp TIR        | no                  |
| TIR-Flipper-1 | 7:1080292-1078431  | Bfab07g02925   | 572       | 44 bp TIR        | within AT-region    |
| TIR-Flipper-1 | 8:1725030-1723153  | Bfab08g03825   | 572       | 44 bp TIR        | within AT-region    |
| TIR-Flipper-1 | 14:2071197-2073054 | Bfab14g05225   | 597       | 44 bp TIR        | within AT-region    |
| TIR-Flipper-2 | 15:1769760-1768120 | Bfab15g1602550 | 547       | 44 bp TIR        | next to AT-region   |
