# Supplementary material for: Genome Comparisons between Botrytis fabae and the Closely Related Gray Mold Fungus Botrytis cinerea Reveal Possible Explanations for Their Contrasting Host Ranges
Source: J Fungi (Basel). 2024 Mar 14;10(3):216. doi: 10.3390/jof10030216 (PMC10971195; doi:10.3390/jof10030216)
Supplement: Supplementary file 1 [file jof-10-00216-s001.zip]

Archive with 20 entries (20 files):
- BfabG12_CDS.txt
- BfabG12_mRNAs.txt
- BfabG12_proteins.txt
- Figure S1.jpg
- Figure S2.jpg
- Figure S3.jpg
- Figure S4.jpg
- Table S11.xlsx
- Table S12.xlsx
- Table S4.xlsx
- Table S5.xlsx
- Table S7.xlsx
- Table S8.xlsx
- Table S9.pdf
- Table S10.pdf
- Table S13.pdf
- Table S1.pdf
- Table S2.pdf
- Table S3.pdf
- Table S6.pdf
