# Supplementary material for: Genome Comparisons between Botrytis fabae and the Closely Related Gray Mold Fungus Botrytis cinerea Reveal Possible Explanations for Their Contrasting Host Ranges
Source: J Fungi (Basel). 2024 Mar 14;10(3):216. doi: 10.3390/jof10030216 (PMC10971195; doi:10.3390/jof10030216)
Supplement: Supplementary file 1 [file jof-10-00216-s001.zip › BfabG12_CDS.txt]

>4361325e-5b89-4a03-816b-d788dda0b9c5 (mRNA) 1068 residues [BFAB_07:18203-20210 - strand] [cds] name=Bfab07g00040.1
ATGAATCCTCTTCCACACAATCAATCAAGTCTTGAATGTGGTATTCGGAAGATTATCGCG
ACTGGAACCATTCCCGCCCCGAACGCGTATTGGCAACCAAATTTCACCACATCAATAACC
CCGATTAACTGTTGGTCTCACAACGACGAACATCAACAAATCCCTCTCTATACCGCTCTT
GCCGCTGGCTGTATAGCAATTGAAGCGGATTGCTTCATTCCTTCCTACTACAGTTCCTCT
CGCTTTCTCACCTCATTACTCTCATATTTTACATCTTCGTCAAAACTTGTAGTGTCCGAA
AATGATCTCCTCGTAGGTCATGAAACATCAGAGCTTAATCCTGCAAAAACACTCTCTAGT
CTTTATTTAGACCCACTTCTGGAGATTTTGACCCAACAGAACAAAGCTGCAGGAAATCCA
GAAAAGAAAGTAGGAGTTTGGAATGAAAATCCACATCTATCGTTACATTTGACAGTCGAT
TATAAAAGCATCTCCTCTGGACATGATGGAATATCCATCCTCTATTCTCTTCTCGAGCCT
CTTCGAACTGCGGGTTTCCTAACTCACTATGACTCGGCTACCGAGAAGCTGATTTCTGGT
CCCATAACCATCGTTGGAACTGGCGATGCCGACTTTGAATTGATATGCGGCTATGAAAGC
ATATATATCTTTAAAGATGCTCGATTCTTCAATTTCCTGTCTTCTCAAAATCCATTTAAT
TCATTATACGTCTCGGGTAACATTTCTAAATCTATTGGTCGATTTTCAAAATCCAAAGGA
CCTACAAAGAAGCAAGTCAGAATAATAAGGAATGAGTGTAAAGAAGTGAGAGAGAGAGGA
CTGATACCCAGATATTGGGGAGCTCCTGATAGCGAGGATTGGTGGCGAATATTGGTTGAG
AGTGGAGTTGAGGTATTGAGCTGCGATGATCTTGATCGTGGAGGAGAGTGGTTAAGGGGC
TGTATTATTAACGGGGTAGGAGTAGGAGCTTCATGGAAAGATGATATCAAAGAGAGTGAT
GTGGAAGGTTGGGACGAGGGATTGTTTGGAAGATGTATAGTCTCGTGA
>66a144fa-907c-4eb2-8f61-99d10b82f3c5 (mRNA) 2106 residues [BFAB_07:20923-23850 - strand] [cds] name=Bfab07g00050.1
ATGTCTTACTCCGATAATATATCTAATGCGGAAAACAATCCAATAGACAAGTGGAATGAA
GATAATAGTGATGAGCTCAGTCCAACCGATGGTTATTTCAATTCGAATCAAATCCCTCAA
AATATGATACCGGACCCTACACTCTCACAAGAGGAGGATAAATCGAAAGCTCAAGATGCC
AAGGGGAATCTTCCAAGGGGTGGTAATATCCCTTCAACTCTGCAGATTTCGTCGCACACC
AATGCGTCATCTCATGTAATTGAGCACCCTCGACATTCTCAAACCTCGTCTAATTCTCTT
CTTGCTTCGTCATATCACAGAATAGATAATTCTTTCCCTGAAAATCAATCCTTCTTGGAC
CAACCTCCCCCAGCTTATATAGCTTCGTTAGAGTCTTCGCCTGTCTCAGCACAAGGGCAG
CACACTCTCATGCACTACAATACTTTCTCACAAGATCGCCTCGAAGAAGGTCTACCAAGA
GAGCCTCAGAGTATGGGAGGACCAGCAGGTAATCAGGACATCGATGAAAGAATACCTCTT
TTGCTTGACCGAACACCCAAAAATATTTCCTTTCGACGAGACATTATAACAAAAGCTCTT
GGACTGGGATTGGCTCTAACCATTGCTGCCGTTATAATAGGTGCGATTCTCACAGAAAAA
TCAAATCCAGATTCAAACATGGGAGAAGGGCCTGCATTTCCCGACCCCATCCATGATGGT
GGCTCATATTGTCAACATATATCCAAATCGGACCAAACCACATTCGAAATCATTGATGCA
GCCGGAATTGTAGTAATACAAGATTTCTACCAACACAACTCTGCTCATTATGGTCCGGAG
GTCAAAACAGCAGGAGAAGTTCACATTCGAAATCTACCAAACAATTCAACAGGTGGAAAA
GCACATTTTACAGTTGAAGTTAAACTTAGCCACCCGGAATTGTCTGTGCTAAAGACTTTG
AACGAGCTTGATGGTTCATTGAAAATCAGCACGCCGAGATTTGCCAACCTAGGTATACAT
GAAAACCCTTGTATCTCTCTTGAGATTACGGCTTGGATACCAAAAAATGCAGAGTTTTTT
AAAGTATTTTTTGACCTGGCAACTTTATCGATTCGAATCTTTGACGATGTCAATATCAAA
GTTGTCAAAGATGCCATGTTAAAAACAATATCAGGTCATGTTAGGTTTCCAAACGACCCA
GCTTCATCGACGAGTCATACTTCCCTCTCAACTGAAAATGAATTAAGAACAAATTTCGAT
TTCGATTCTCGTCACATTGTCGTCGAAACTGTGTCAGGCAGAATCGAAGGCATATATCCC
CTGTATGACCTTCTCAAAGTATCTTCCCAGTCCGGATCAATAGGAATCGAGGTACAACCT
AAGCCCGTTCTTGAATCAACACCCGCTCCTGCTACTTTGGATATCAATATATCTTCGGGT
AACATCGACGTGTCGTCACCTGTCAAATACCCAAAGATCACTTACCCCCGAGAATATATC
ACACATGTAAAATCTATTTCTGGGGCCATTAAAGGCCATTTTTTTGTTGGATCTACAGGG
AATTTTGACACTGTTTCTGGTATGATTCAACTTGTGGTAAGGCCAGTTTTATCAGCTACT
TCCGATGACGACGATGATGAAAGCGGAAATGAGTTTTCTACTCATTCCGTGAGTGGAAAT
ACACATGTCACATTACTTGATCCTTTGTTTACTTTACTCTCTATCAACGGCAAGGCTCGC
AATAGTGTGATTGAATCTGATCCCGATAGCCATGACTCTTCATACACTCCCGCCCTCGTT
GACTTATCGAGCTCCTCTTTCCAGGCGTACAATAGTAAACTTCGCACAGTTTACTCGACA
CATAGAACCTCCTCTGGAAGTATCGAAGCATACTACCCCTTAGCTTGGATCGGCAACATT
GAAGCGAAAACCATTTCGGGAAGAATAGAATTAGAAGGGAAGGGAATAGACATTGTCGAG
AGGCATGATGGATGGGGTTACAAGAATACCAAAGCTAGGAAGGGAGTCGAGAGGGACGAG
GATGGGAGTAGTGTGAGACTGGAGACGGTGAACGCGGCTATTGCATTAAGAATCTCTGAA
TCTTGA
>99b43857-2ff8-4ab2-8720-87fa21181dd9 (mRNA) 2619 residues [BFAB_07:24622-28413 + strand] [cds] name=Bfab07g00060.1
ATGCGAGCTTTTCACTGTGTTAAAGTGTTACTTTCCCTTTATTTCAGTTGGAATGTGAAT
GCTAGTCCTACCCTTGGAACGACACCGACCCTGAGCGCTAGAAACTCGGCTTCGACTGCG
TGCGGTGATATCGTTAACAATGAAGATACCGTTTTGTTCAATGCAACTCTGGCATTTGAA
TGCCTGACCAGTGTGCCATTCAATCCTGCTGTTGCCTCTCGGTTTATCTCATACTATAAT
GATACGCTTCAGTTCCAGAGTACTTTGGAATATCTCAAAAGCCCACCTCCAAGCTATCAA
CAACCAGCTGTGGATCTAATAGCGGGCCTGAATCGAATTCAAAGCGCGATCAATGAAGGT
ATATTTTCAAATCAATACGAGTTTGAAGCTGCTTTACAGACTCTAGTATATGCCGCACAC
GATGGGCATGTCGACATCCTAGCGGGAGCTCTGTCTGCGTTTAGTTTTGCAAGTCCAAGG
GATTTGGTATCACTATCATTAGATGGCCAACAAATTCCGAAGGTCTATCTAGCCGACGAT
CTTTTTGACAGTGACTATTTTACAACCTTTCAGCCTTCAGCTATCAAATCAATAAATGGT
AGAGATGCAACTACGTATCTTTTGGATTTCGCATCCGTGAATTCAGTCGGAACTCTTGAA
GACCATTCAGATTGGAATCAATTGATGCTCAGTGCAGCTCAAGATATCCAAGGGTATTTC
AATACATTCAGTGGCGGCGCGACATTTTACCCCGGCAACAGTATTACATTTCTTTTGGAG
AATGGGACGTCTTGGACTGAAAACTACCTTGCTATCTATGATACCCCTGGTCCCACCGGG
CCTCTTCAAACTGGAGGAGACTTCTACAATTTTTTTGTTTTGGGGTTCTATCCTGCATCA
TATGATCCGTATACGGATGATTCGGATGACGATTCAGAAGATAGTTCCAGTGATGATTCA
TCCACTGCAGTCACTTCGACGACATCTGCTACTCCAACTCTGACCGGATGGGAAAGTCCA
GCTTATCCAGAGATTCCTGATGTTGCCCAAGAAGATCTTGGAACTTATGGGGATGGAGTT
GTTTCTGGATATTTTCTCAATTCTACTTCTGTTTCTGTTTTAAGTATTCCAAGCTTTGAT
GTCGATGGGGATGCTGTATTTAGTTTCCAACAAACAATTTCTCAGTTCATCAATCAGACA
CAAGCAGCAGGCTTAAAGAAGGTTGTGATTGATTTGCAACAAAATTATGGCGGACAATCT
TTACTTGCAATCGATACATTCAAACAATTCTTCCCGAACATCGATCCCTTTGCTGGTTCC
CGTATGCGAGCTCATGCTTCTGCCGATGTACTTGGCAAAACTTTGACTCCATACTGGGAT
GGTTTGGCCGAAAACGATGAGACAAAGTATGTCTTAGCAGCTGATGAATGGGTTATCACT
AATCGGATTAACGCGGATACGAATCGCAATTTCACAAATTGGCAGGAATTTTTCGGGCCT
AATCAATACAATGGTGACAATTTTACCAAGATTGCACGGTATAATCTCTCCAATCCTATT
TTTGACGCATCTGGTACCGGTCTAGATATTAGCGATGACGCTTTTGCAGTGTATGGCTAT
GATGCAAATCCGGCACCATCAGGGGCTCAGCCACCATTTGCAGCAGAGGATATAATCATT
TTATCTGACGGTATATGCCACTCTTCTTGCGCTCTTTTGATTGAGATGTTTCGTCATGAA
GCTGGAGTCCGAGTTGTAGTGGTAGGAGGCACACCAACAACGGGACCAATGCAGGCTCCA
GCTGGATCTCGTGGCGCACGTGACTACGATACTTTTACCCTTGACGCCAACATCGATTTT
ACTCAACACCTTTTACAAAATCAAAGCTCGACCGATGCAATATTTCTTCCGAATAGAACT
GAACAACTCAGTGTGTTTGTCTACTTTGCGGATATAAACCTTCGTGATCAAGTACGCAAA
AATGAAGAGATTCCATTACAATTTGCCTACGAAGCCGCAGATTGTCGGATCTACTATACA
CCACAGACTGTGTATAATTACACAAACCTCTGGCAATATGCAGCCGATGCCATCTGGAAG
AACTCCAGTCTTTGCGTAAATGACTCAACTGGATATTCGTCAACGTCACAAAATTCAACA
AATTTTGTCGGCCCATCAGGCGGTGCTGAAAAGACCTCTACCAATATCACCGATTATCTT
GCTTCATTAACGACCTCTCCCATTGCAAACTTCATTCTCCAGGGTCTCAACGATGGTCTT
CCAGCCGCCAACGAAGGTGCCTCTCGCAATGCTCCTGCATCTACCAAAGTTATCAAGTGT
ACCACAGATGAAGACTGCTTGAATGGTAAGCTTTGTGTGAATATTCCGTCTTGTTCTGGG
GGTAAAGCCATATCTCAGTGCTTGAGAAAATGCCCAGCAGCCGGTCGACTATGCCCTAGT
ACCAAAACTAAGTGCACACCACATAGCACAGATGGAAAATTGGGAAATCAAAGGCTTCAC
AAGAACATTTGTCCCCCAGCAGGAATTGCAGCAAAGTGTGAGAGTCAGAATCAGTTGAAG
ACAGTTAATCTTAATCAATGTCCTGACTGTAGCAAATGA
>5d96d8d7-c6f5-45ee-80f2-37de8f9770e9 (mRNA) 2124 residues [BFAB_07:28519-31112 + strand] [cds] name=Bfab07g00070.1
ATGCCATCTAACGACGGCAAAATCTACCCTTCTATTCTCCCTTCCCCTTTAATCCGTCTT
TTAAGTCTCGATTCTGGTTCTGATGAACCAATTAGAGTAACACTGCATGAAGTAAATCTC
CAGAATGCCCCCGCATACGATTGTCTCTCATACACTTGGTCTGACCCACTATATCATGCT
CTCAGTCCGGAAGAGGAAATTCATCTTAGCAACGATAAACGCGAACATCCTATTCTCTGC
AACGGTCAGAACTTGTTGATTACGGAAAGCCTATTACTTGCACTGAAGGAATTCAGTAAG
AATAATGGCGAGGATAACAGAAAGAATTGGAAAGATGGGTATTTCAAGAGGGCGAAGTTT
ATGTGGATAGATGGCATATGCATCAATCAAGACAGCATTGAGGAAAGGAATATACAAGTT
GGAATGATGGGAGAAATCTACACAAAATGCTCGCAAGTAATTATCTGGCTTGGAGTTTCA
GATTTCCATTCGCCGTACGCTATTGAAGTCATAAATCTTCTCTCGAAAATACCCCAGGAA
AATTATACTGGCTTACGGATTACTGATCTTGAAGATTGGGATATATATCCAAAATTGGGT
ATCGAAGAAGTTGAAACTTGGAAATGGTTGGAATATGCAGCATTTTTACAACGTACTTGG
TTCAGTCGCATATGGGTTGTTCAAGAAGCGTTTCTACCAAGGAATATTGTTGTGGTTTGT
GGGAGTGATGTTATTGAATGGGGAAATATAACAGCTTGTGCCAAAGTTCTTAGAGAAACA
GGATTGGGAACTTTACTAATGGAGTTGTTGATCGAAACTGTGGACGATGTTGAAGGGACT
GTATATGTGAATAATACTTTGAACAACCAGTCCATCTTTCAGAGTATGAGGGATATGGCT
ACACTTGGGTCAGAAGAAATGGGCAAAGTCTTGGATTTGGAAAAGTTGTTGTATTATTCA
AGATTTTTTGATGCAACAAATCCAAAAGATAAAATCTATGCAATCAGAGGCATTTGGGAA
AAAGGAGGAAAAACAATTCCACTGGACATGACGCCTGATTATCAACGAGATCCAACGGTA
GCAAGTGTGTATACGAGAGCAGCACTTGAAGTAATTTTTGAAACCAAAGATTTGAACATT
CTTTCTTTAGTGGAAGATTACACCTTGGCGACTCAAAAACCTAACTCTGTGAGGGCTATT
GGTAATCTTCCTTCATGGGTGCCCGATTTTAACTCTTCATCTAATCCTCAACCTTTGGCT
GGAAATCCTAGACCAAAACTGGGAAGTGAGAGATGGAATGCAGCTCGAGGTATTCCATTC
GAAGTACCTATTCTTCCAGCCTTAGAATCACGACATCTTCTTCCAATCACAGGTTATAGA
ATTGATGTTATCTCGGAGTCTGCAGCTAATCAAGCAGAATTAATGGGTAACAATTTCGGT
TTTGACACGGTGTTGGAACTTTTGGCAAGTTATCCGGATCAAAAATATCCTCATGTTGAC
GATAACGCGGAAACACATTTCGAGGCATTCTGGCGAACTCTCATCAAAGACACATTCCAA
AAATTGCCGGCGAGAGAGAACGCACGAAACGCTTTCCGATATTTTATCACAGTGCGTGTC
TCTGAATTGAGCATTGCATACAATTACGCACTTTTAAAACAGACCTCCGATCTACCCAAA
CTACAGAAATTATACGAAAAATTCAAACAACTCATCAATGACTTGTCCAAACATAGACTG
AACGAATCTCTAATACCCACCTGGGAGGATCTTGGAAAGCTCATTGTGATAGCAGCTAAT
GAAGATTTAACTGACCCAGAAAAGACGAAGCTGGACAAAGACTATGGGGACTTTTACGAG
TCTTTTAGAATTGCCTATGCGGGAAGAAGAATGTTCAGGACAGAAAAAGGATATTGGGGT
ATTGCTGCACAAACATTAGATGTCGACAATGAAGACGAAATCTGGGTTATAGCTGGGTCA
AAGGTACCGATGGTTTTAAGACCAGTGAGAGGAAGTAATAGTGTAAATCGGGAATTGATC
GGAGAGGCTTACGTACATGGTATTATGAATGGCGAGGTTTTGAAACTTCCGAGGGGAGGG
TTAAAAAGTCTATTTTTGGAATAA
>6228f854-dbaa-4830-82ae-47d2f1c0eab1 (mRNA) 1041 residues [BFAB_07:43960-45318 - strand] [cds] name=Bfab07g00090.1
ATGTCGCTCCAAAAGCAAGTCTTCCTTATTGGTCCTGGATATATTGGTGGGGAAATACTA
GATCTTTTACTCCAGGAAGGCTGCTATGAGATTACGGTACTCGTTCGCAGGCAAGCTGCT
GCCGAGGAACTCGCAAAACTTGGTGTCAGGACGGTCATAGGGTCTCTCAGCGATTCAAAT
ATCATCGCAAGGCAAGCTTCCTTGAGTGATATCACTATTCATACTGCAACTGCAGACGAT
CTTGTCTCGGTAGAAGCCGCCATCGAAGGCATCACCCAACATGTGCAAAGCGGCCGAACT
GCGATTTATATCCACACAAGTGGAGCGAGTTTGCTTGGAGATGATTCAAAAGGCTCGTTC
GCCACCGAAGTTTTCTACGAGGATGATAGACCGGAACAAATCGATGCAGTATCTGACGAG
GCACCACATCGGAAGATTGATCTTGCCATTGTCAATGCCAACAAGATTCTCGGCCCAAAA
GCGAGACTAGCAATCATGAGTCCTCCTCTCATTTACGGAATAAACTCTCGGGAAAAGCGA
TTATCGATTCAGTTACCCACTCTGGCTCGATTTGCGATAAAGCATGGCTATGCCGGGCAT
ATCGGGAAAGGTTTATCAAAGTGGTCACAAATACATGTTCGAGATTTGGCAAGAGGATAT
ATGTCATTATTACACACCCTAGAGATCAGTGACTTGGATATTGAGAACCCTTACTACTTT
TGCAATAATGGAGAAGACCTATTCTGGGGAGAATGTGCTTCGGAGATTGGCAAAATCTTG
TACCAGGAGGGAAAAATCAAGAGTCCCGAGACCAAAATTATACCTTTGGATTCTTACAAC
GACTTATTTGGGCCCTATTCATCCGCAGTGATTGGATCTAACTCCTTGAACCGAGCTAAT
CGATTAAGGAAACTTGGATGGGAGGCAAGAGAGCAAAAGACTCTCTTATCTTTGCGTGAT
GAATTGATGATGATATTGCAGGAAGAAAAGCCTTTTTTGGGATATTCTGCACCTGTAGCT
TCTGGATCGAACCGAGACTGA
>86dd68f2-2895-4396-be3b-d73a697b0ae3 (mRNA) 1917 residues [BFAB_07:45606-48256 - strand] [cds] name=Bfab07g00100.1
ATGGACTTCATAGGATTTCCAAAACACAAATATGCGACCGACAAGCCATTTATTTACACA
ATCCTTCCATCACCCACGTCCATTCGACTTCTTGAAATAAAATCAAAGCTGTGGTGTCGT
ACCAAATACTCTTTTCATGTAGTAGAACTTACCGAAGCTCCGAAATTTGATGTTGTATCC
CATTCGCGGCGAGATCTTGTTCCACGAAATCATATCATACTCTGTGATAACAAGATATTG
AGAATCTGCGGAGATACAAAGAATGCCATCAAAGCTGGAAGGGAAGTTGTTTCAAAAACT
TATGGAAAGATGAAGACACGATATGTTTGGATCGATTCGATGTGCATTAACCCAGAAGAT
GCTATGGACCGAACTGCCCAAGTTTCAATGATGCCGGAAATTCTCAAAAAGGCTCGTAGC
GTCATTATTGGACTTGGGAAGAGGGATGCTTTCACTTCTGATGCATTGAAAGCCCTGAAA
ATACTATCTTCGGTGCCACATGATGAGTGGTCAAATTTAGTGAGCTTGGACTGGGAGTGC
CAGGATCAATACTTCCAAAGGCTCAACATTGCACCTTTGCAACTTCGGTCATGGCTCAGC
CTTATAGCTTTCTTTAACAGACCGTGGTTTTCAGGTATCTGGGCTGTACAAGAAGTTACG
ATCGGAAATGATGTCATTCTTGCTTGCGGGAAGGAAATGATTCCTTGGGAAACAGTTTCG
AAGACATTATCGTTTTTAACCCATACTGGGTGGTACACGAAACTTCACACTAGTCATTTG
ATCAAGTTTCCCGGCAATGATCTTAAGAGTAGAAGACTTAAAAAGCATCAAATACTGATG
AATTCAGAGGTTGGCCTTAAGATGGCAGTTATACAGCTTCAATCCACTCGAGCAGGGAGT
GAAACTAACAAACAACTTCCTTTATTTCGATATCTTCTTCGCGCCCATCGATATTGTGAG
GTTTCCGATAAACGAGATATTATTTATGCGCTACTTGGGTTATCGAGAAAGGACGGTCTG
CCATTCACAAAGTTCCCAAATTTTCTTTCAACTAATTATGAAATGGCGACACAAGATATT
TATACTAATGTGGCTAGAGTCTTGCTCCGATGCTATGGCCTAGGAATATTATCTGATGTT
CAGGATTCAATAGCGTCTATTCCAAATCTACCGACGTGGGTTCCAGACTATAGCATCGCG
CGAAGACCGTTACCTCTGTCAATGCGCGGCGACTGTATCTGGAGTGCCTGCGGTGATATG
AAGTGGAATCAAAATTTCTCAGAAACTGAGACCCGCTCCTTGATATTGCAAGGTATGCTG
CTTGATACAGTCTGTGAAAAGGTCAAGCAACAGAATAAGTCCCTACATCCGATGGAATTC
TTAGATGGGATATATGAGGTTGCAACTCGTTTAGACCCTATATACCCACTTTCGATGGGT
GGCAAATTTCAATCTTCACGTGAAGCTGTATGGCGTACTATTCTAGCAGATACGTATCGA
AAGGAACATCCAGCTCCGCAAAAATGTGAGGAACTCGTAGCACACTATCAGGAATGGGTC
CGCAACGGAGTACGCAATGGATCTCAGGCAACAAATTCTATGCAACGACTCAGTATCACT
GAGAGGCAACCGCGAAAATACGGCAAAGTGGACTTTTCAAGTCTTGAGAAAGAAATAGAA
GCTGCAAATGATGCCCGTACTTTATTCCGAACTCGCAAAGGTTACCTCGGCATCGGAGCA
CAATCTTTACGACCGTCTGATGAAATTTGGGTTTTAGCGGGTGCTTCAATTCCTTTTATT
CTTCGACGAGGTGAAGACGAATCCCATGAACTAGTTGGAGAGGTATATCTACATGGGGTT
ATGCATGGAGAAGCTTTGGGATGGGGACATGAAATGAGGAATGTATTATTGAAATAA
>8f865ff4-b39e-4011-951c-7ba3043a440b (mRNA) 1389 residues [BFAB_07:49224-52008 - strand] [cds] name=Bfab07g00110.1
ATGGCTCTAATTTTATGTCTCGCGCATTATTGCGACACTCATGGTCCAACCCCAGTCATG
GTAACAGAAGCACTTCCAGTAGGTTGTACTTCGTGTCCAGAAAAAGAAGAACCCATTCCT
CGGAGGCCTAGTACGAGTAAATCGTTCAAATCCTCGGATCCTTCTTCAAACATAAACGCG
CATACTTCACATAGAACGAACTCAATTGTTTCCGAGCCAGACGTTGCGGCGAGTCGGCCA
GCTCTTCATGTAAACTCAAGTCCCTCGAATGCGCCGAATACAGCGGGTTCTGCGGGTGAA
ACACCTCCCCAAAGTCCTAGAGCACCTGCTTTGCAAAACACACAAAACACGACAAACCAA
TTGCGACGCGATTCGAGCTTTCGCAAAACATATCCAAGTGAGAAGCCAGGTCCATGCGAA
AATTGCGCTCTTACTTTACCCAAGAAGACCAAGGAGGAGATACCCACAAGTCCTAAACCT
TCGGGGACTGGCAAACTCGATAATGGTCCGATCTTGCGAACAAGGAAGCCTTATGAGCGC
ATTGCAGGTCAGAGTACCCCTCCCAAGTCTGCATCCTCAGATTCGGACGATTCGGAATGC
GCAATTCAGAAAGAAGAACGGGGAGAGCAACACCAGGCGCGGAGACTCTCGGTCAAAAGA
TCCGACACATCTTCCACCTATACTACCAGAGAATTCCTTTCGCATAACCATTTTGTTGAC
TATACGTCAACGCATGAACCTCTACAACCCACTTCTTTCTCCATTATTCGGCAATCTTGT
CTTCGTACTCTTTCTTGTGAAACCCTTCCACCGTCATCAAATCCCACGCCTAATTCCACA
CCCTCCTCCCCTTTTATCTCCAGTTTCTCCTCCCACCTCACATCTTCCACAACTACCTCA
TCAGCTGGTCCAATTTTCTTTGGCGACCCAATGGCTGGCTACACAACCGCATACATATTC
CGCATTCCTGACCCCTCTGCTCGTGGTCGTCGTCGAGTCTATGCTTTAATCGCCCTCTCC
ACCCAAAAAGAGCGGATGGCCATGCGCACCTTTTCTTTCCTCGACGCTGCCTTCCGCGAA
CTCGCAGATTGGATCGCACGTCTCGCTGATGAAGAACTCGCACGTTCTGAATCAGCACTC
CAATCTCCTAGAGCTGGCGATGAGAAAAACGGCAATGGAATCAGCGGCGGCCCGTTTGGA
GGTGGTGGTACGACAACCACACCTACTTCATCTTTCTTAAGAGGTGGCAATAGAGGACCG
GATAGCAGAATGGCCGGTGCGAGTTTGAAAGGAAGAGGTTTAGCTGAGTTGGTGGGACTG
CCTGATTTTTTTATCGAGTTGCATAGCAGGTTTGTGAGATTGTTGGCGGAGATTGAAAGA
CCGAGATAA
>450ef304-5674-4c0f-8ad6-9c891991d8be (mRNA) 1617 residues [BFAB_07:54527-57577 - strand] [cds] name=Bfab07g00120.1
ATGGCTGATGAGCTGGCAACCAAGCTAGCGGCTACTCAGATCAATGATAATTCTTCCCCG
GACAACTGGAAAGCTGGTCTAAACATTCCAGCGAAAGACACGAGGCAACAGACAGAGGAT
GTTACCGCCACCAAAGGTCTCGAATTCGAAGATTTCTCCATCAAGCGAGAGCTGTTAATG
GGCATCTTCGAAATGGGGTACGAGAAGCCATCCCCAATTCAAGAAGAAGCAATCCCCGTG
GCCCTTACAGGTCGAGACATACTGGCTAGAGCGAAGAATGGTACCGGTAAAACTGCCGCC
TTCGTTATCCCTGCACTCGAACGTATCAACCCTAAAAACACCAAAGTACAATGTCTCATC
CTGGTACCCACTCGAGAACTAGCTCTTCAAACTTCACAAGTCTGCAAAACTCTTGGACAA
CATCTCGGCATCAACGTTATGGTCACTACTGGTGGTACTACCTTGCGAGATGATATCCTG
CGTCTCCAAGAGCCTGTTCATATCATCGTCGGTACACCTGGTAGAATCCTCGATTTAGCA
GGAAAAAATGTCGCGGACCTCAGTGAATGTAACATGTTTGTCATGGATGAAGCTGATAAA
CTCCTCTCACCTGAATTTACTATCGTCATCGAACAACTACTTCAATTCCATCCAAAGGAC
CGACAGATCATGCTCTTCAGCGCAACATTCCCAATGACGGTTAAGGACTTTTCGGATAAG
AACATGGCCGACCCCTACGAAATCAATCTTATGGATGAGCTCACTCTGCGCGGTATTACT
CAGTTTTATGCATTTGTCGAAGAGAAAGAGAAAGTACATTGTCTCAATACTTTGTTCTCA
AAACTACAAATCAACCAGTCGATTATATTTTGCAACTCTACAAATCGAGTCGAACTTCTT
GCCAAGAAGATTACCGAATTAGGCTATTCATGTTTCTACAGTCATGCTCGGATGATCCAG
GCCAACAGAAACCGTGTTTTCCACGACTTTCGCAATGGCGTCTGCCGCAATCTTGTTTGC
TCTGATTTACTCACTCGTGGTATTGATATTCAAGCTGTGAATGTTGTTATCAACTTCGAT
TTCCCTAAGAACGCCGAAACTTATCTTCATCGTATTGGTAGATCTGGTCGATTTGGACAT
CTTGGTCTCGCAATCAACCTCATCAGTTGGGAAGATCGCTTCAACTTGTATAATATCGAG
CGTGAACTTGGGACAGAGATTGCCCCAATTCCTCAAATTATCCCGAAAAATCTCTATGTC
TACGAAACTCCCGAAAACATTCCACGTCCCGTATCCAATTTCCAAACCAACACTCGTCAG
GCATCAGGACCAGGACGTGATCAGCAACAACCCACGCAGCACTCGGGAAATCAGAGAACT
GGTGGTCAATATAATAATTATAATAATGGACGTCAGAGTGGCCCAGGTCAAAACCAGAGT
CAAGGACAAGGGCAAGTACAAGGGCAAGGACCAAGACAGAACCAAGGTCAGCGTCAAAAC
TATTCCAGGGGCCGAGGTGGATTTGGTGGTGGTAGAGGAGGTGGTCAAGGACCACGACAG
AACGGTTACGACAACTCAAGAGGAGGCCGAGGCCAGGGTCCTCCACCAGCTCAATAG
>21457fe8-a378-4530-b641-0300b4dc96e3 (mRNA) 1584 residues [BFAB_07:57850-60176 - strand] [cds] name=Bfab07g00130.1
ATGCCACACTCTATATCCACCGGAGAACCCTCGATACAATCACAAGAGAATATGGCAGAT
AGCGAAGAGAACCGGGATGACGCACAAATAAGTCAAGAAGCAGAGAATGCGTCTGCCAAC
ACGCAGGTTGCTGAGTTGAATGATGACGAAGATATTACAATGGCAGACGCTGGAGTACAA
AGCGAGGCGATGCCGCAGGCGGCTGCGAAAACCGAGACCAATTTATCAGATTTGTTTGGA
GATTCAGAATCTGACGATGAATTCCCAAGTACAAATGCGAAAGAGGAAAAGGTGTCCAGC
TCACCTGAAGCGCCAGCTTCCACAGTAAATATAGGTCCTACATCGCGATCATCCGATCCG
GAAGTTATGCGATCCTTTTATCAGAGACTTTTCCCTTGGCGCCACTTATTTCAATGGCTC
AATCATTCTCCGACGCCCTCAACCGACTTTGGACATCGTGAATTTGCATTCACCCTTCAA
AACGATGCATACTTGCGATACCAAGCATTCCCAACCTCCGATCTTCTACGTAAGGATGTC
CTTCGTCTTATGCCGTCCAGATTCGAAATTGGCCCAGTATATAGTACAAATCCCAGGGAT
CGCAAAACACTTCGCAAGTCTTCCGCCTTTCGACCAATAGCCAAAGAATTATGCTTCGAT
ATCGATTTAACGGATTACGACGAGATCAGAACGTGCTGCGACAAAGCAAACATCTGCAAT
AAGTGCTGGCAATTCATTACTATGGCTATCAAAGTGGTTGATGTTGCGCTACGCGACGAT
TTTGGTTTCAAACATATCATGTGGGTATATTCTGGAAGGAGAGGAGCTCACGCTTGGGTA
TGCGACAAGAAAGCCAGGCAAATGGACGACCAGAAGAGAAGGGCTATTGCAGGATATCTA
GAGGTCATTCGAGGTGGATCACAAACTGCGAAAAAAGTTAATGTGAAAAGACCACTGCAT
CCGCACGTATTACGAAGTCTCGATATACTTAAAGGGCACTTCCAAAACGATATCCTTCAT
GATCAAGATCCGTGGGAGGAAGACGATAAGATCGACAAGTTATTACAGCTTCTACCTGAC
AGAACACTGAATGAAAGTTTACGAAAAAAGTGGAGCTCTGCTCCTGGACGGTCATCAACA
TCGAAATGGGCTGATATTGATGCATTGGCAAAATCTACCAAGGGGTTGGATCCAAGAGCC
TTACTAGAAGCGAAGCAAGATATTGTTCTCGAATACACGTACCCTCGACTTGATATCGAA
GTCAGCAAGCATCTCAACCATTTACTCAAAAGTCCTTTCGTCGTACACCCAGGCACAGGA
AGAGTGTGTGTTCCTATAGACACCAGACATGTGGGGGATTTTGATCCTCTGGCTGTACCA
ACTGTGACTGAACTTCTGGGTGAGATCGACCAGTGGACCCCGCCCGAAGCTGGTGATTTG
GATGGAAAAAGCATACAAGATTGGGAGAAAACAAGTTTGAAGCCATACGTAGACTACTTC
AGATCATTTGTCGCAACTCTAATGAAAGATGAAAGCGATATCAAAATTAAAAGGGAGCGA
GATACAGATGCGATGGCATTCTAG
>f9761217-99dc-428c-94dc-5f9bf797bdef (mRNA) 1746 residues [BFAB_07:63987-67059 - strand] [cds] name=Bfab07g00150.1
ATGTCACTAACAACGAGAATGAATGGCTACTTCCGTGAGCAGAGCCAGCGCGCTCGTGGA
CTTCGCCTTCTTAAACCATCAACTACTCTTCCGCGTGGCGTCTTGGGCGGTCCTAGACGA
ATAATTGACCCCGACTCGGGTCTAGTATCGCAGGAAACAACTTCACGGGAACTTCAAGTC
TCGGACTACCACTGGGATTCTCAATTTGAGGAACTTTTAGAAGCAAATTGGGAAGAATCT
GATAAAGATCAAGAGCTCACCGCCGAGGAAGCCATCACCGCACAATTCAAACGTAGAAAG
CCCCGTGTACCACGTTTAATGCAACTTGCGGTCGATTCGATTGTTAAAAACATTAGTAGT
ATTACCTATGAAAGCATCAAGAACATGCCTTCAATACAGCTCGAGTTCCTTTGGCGTGAA
CTGTCCAAGAGATGTGTCAACAGTTTTAATACGTGGAAGGCCTTTTCAAAAGTCCTCGAT
CGACAAGAGGGTGCCATTCTAAACCAATTTAGATATAGTGGTTCTGTTGAAGAGCCAGTC
CCGTCCTTATCTGTCTATACAAAGCCACTCAAATCGCTTACTTTCGACTTTCTTGTACAC
TTATCTATTACCACTGCTTTCAGCACTTCGAATATGGTCGAATTATCTACACTTTCTAAC
TTAGTAGCTCTCGAGATCTCTAATCCAAAGCATGGCAAACATGTAAGGACTGCCGGTAAG
CAATTCGATACGAGCTTCGGAGACAGAGTGATCAAAACCTGGGGCGAAGTAGCAGCGACG
GGAAAAGGATTCAAAGTCTTGAGAATCTTGAAGCTTCGAAACTTCCTGGAAATCACAAAC
AATTGCTTCCAATACTTAAACGACTTTCCTGCTTTGGCTGTTTTCGACGTTGTGGACTGT
GGCTTCAATGGGTTGGCTCAACTCAGTGCTGAGAAACTTGGCTGGGAAGTACACCCTGAT
GGAGCATTACTTGAAATCTTACAGTCAGATTGTGTAAAGCATATTATGGCTCTGCGCGCA
AGTCTTGGACTTCCTGCCAGACCAATCCGTAGATCCACTGCCAAACCTTTGTGGGATAAA
GCAAAAGTCACAATGATACCTCGAGCAGATGTACCGACCTTACTTACAGGAGGAACTTCA
TCCGCAGCGCGAAATAGCGCATATCTTCACGCCGAGGAGCAAGTGAGAGCGATGGAAAGA
ACCCCTGCTGGCCGCGCCAAACTCAAGAGAACTGGCCTCTCTCACTTTGAAGCTGTGGAT
TACATCAGTCGCAAAGAATATCGTGAGCTTGAAACTTGGGAATTCCGCACCCTTACCTCT
CTTAATCGAATTAGCGAACTTCGCAACGATGAGGACTTGCGTGCCGCTGGCTTAAAGGTC
GACGAATTTGTTCCCATGGTCTCCGGTGAATTCATATCTTCTATTCCATTTGTTTCTCTT
CGTCTCGGTCCAGAGCTATCTTATGCACCGTCGAAGGCGGATTTGCATCAGCCATTTTAC
GATGGTGGAATGAGTGATAGATCGCTCAAATATACTAGCAAAAACCTCGGAGTTGGCGCA
AAAGGCTATGTTTATACACGTATCGCAATACCTGTCGCTAGAACTAGGATCCGTGAGCAG
TCCGAGGAGATAATGGGTAGCGATGCTAGTGGCTCAGGATCTCGACCAAGCAAGCGTAGG
AAGGTTAGAGGAGACAAGAGACAACAAATAGGCGATCTCTTGGCGGGAGTAATGGGAGTT
ATATGA
>027e9599-3a29-4a98-b497-956a07818a92 (mRNA) 1182 residues [BFAB_07:67987-70271 - strand] [cds] name=Bfab07g00160.1
ATGGGTGGTGGTCATGGATACCGCGCCGTGGCGTATTTTGTAAATTGGGCAATTTACGGC
CGCAAACATTTCCCCCAAGAACTCCCCGCCGAGAAATTAACCCATATCCTCTATGCCTTC
GCCAATGTTCGTCCAGATTCTGGCGAGGTTTATATGACTGACGGCTGGGCCGACACTGAT
ATTCATTTCGAAGGTGATTCATGGAATGATGTCGGTACTAACTTATATGGTTGCTTGAAG
CAGCTCAATATCCTCAAGTCACGAAATCGATCTCTGAAGATATTGCTTAGCATTGGTGGC
TGGACCTATTCATCTAATTTCGCCCAACCAGCCTCAACGGAGAGCGGAAGGAGAAAGTTT
GCAGAGAGTGCAGTGGATTTGATAAGGAATTTGGGGTTCGATGGAATTGATATCGACTGG
GAATACCCCAAAAACGCCGAAGAAGCACGAGATTACGTTCTTTTGTTGAGAGAATGTAGG
GAAGCCATGGATCGTTACTCTAACACTCTTCCTACACCTCACCACTTCGAACTTACGGTA
GCATGTCCGGCCGGTCCTCAAAATTACAATAACATGGATATTTACGGCATGAACCAATAC
CTCGACTTCTGGAACCTAATGGCATACGACTATGCGGGATCGTGGGATGGTGTTGCAGGA
CACCAAGCAAATGTGCTTGCTAGCCACAATAACCCAAGCTCCACGCCGTATAATACGGAA
CATGCAGTCAGGGCATATGAGGCGAAAGGAGTACGTAGCCATAAAATTGTACTTGGGATG
CCGATTTATGGAAGAGCCTTTCAGGGAACTGAGGGATTGGGACGACCGTTCAACGGGGTG
GGAGAGGGTACTTGGGAAAATGGCGTGCATGACTTCAAAAAGTTACCCCAGGAAGGTGCG
AGAGAGTTTGTGGATGAGGAAACCTGTGCTAGTTATTCATACAACGAAAATACCAAAACC
CTTATATCGTATGACACAGTCGAGGTCGGTCGCAGAAAGGCTCACTACATCAAGCAAAGA
GGCCTTGGTGGTGCCATGTGGTGGGAATCTTCGGCCGATCATCCAGAGCCAGAAAGGTCT
CTAATTCACAACGTGGTCAACGTTTTGGGTATCTTGGAGGAAAGCCCGAATTGTATTCAG
TACCCGGGTAGTAAGTATGAGAATTTGAGGAACGGGTTTTAG
>85a67274-06f8-44be-b2f9-cc3e23fc6549 (mRNA) 957 residues [BFAB_07:70539-71897 - strand] [cds] name=Bfab07g00170.1
ATGAATTACAGTATGCTCAAGAAGTCGGGAATTTTGATTTCATCGTGCAGCAATTTGCAA
TGCTATTATGCATTTCCCCGAACATCATCGACGTCACTATCTCATTCCCTCTTCACATCC
CGAAACCATCAACCACAACATCGCTCACAACGACAACACTATGCCATAGTGTCCGACGGC
AGAAGTACAAATCAACATGGAGGATTACAATGGCCTGAAATGACATCCGCGTATGCGGTT
CCAACACCCTACCAAATCTTCAATCAAAAGAAAGGATCTCCATATTCTAAACGACGTTTT
TACGAATTGGTTAAACTTTATCATCCAGATAAACATGGCATCGATACAAGTGATGGATTG
GATTACGATACGAAACTATCGCGATACAGATTAATCATTGCAGCCAACGACATACTTTCA
GATCCCGTCAAACGAAGTGCATACGATACATATGGAGCAGGTTGGAACGGACGACCCGAA
GTCCTCGACCCCCGCGATAAACATGGTGATAATCACGGGTGGGCAGGCCCGGGTGGCCCA
AGTCAAAATGCTACATGGGAAGATTGGGAGAAATGGTATAGCCGCGATGTCAAGGGAGAA
CAGAAACCCCAGTTCGTATCAAATGGTGCATTTGTCTTGTTGATTGCAATTTTTGTTGCG
GTAGGAGGATTGGGACAATTAACGAGGCTGGATAATTATTCGGCAAAATTCTTGGAACAG
AGAGATACATTACATGACAAAATGAGTAAGGATTTGAGGCAGAGAAGGAAAGAGACGAGA
TACACTTTTGGGAGTAGAGAGGAGAGAATACATAGCTTCTTGAGACAGAGGCAGGACCCG
AAGGAAGAAACCTATAGGAAATTGTTGCCGAATCCAGAAGTTTGCTCAAGCGAAGATATC
AAAGGGAGATCGATGGTGGTTTATCAGTCGCCCAAGAATATGCCAAAGGAGCGATGA
>e65f90ae-9b84-42f9-ae06-35240aef7c69 (mRNA) 2340 residues [BFAB_07:77639-82013 + strand] [cds] name=Bfab07g00180.1
ATGAGTGTAATGCTTCAAACCCCTTCCCGGGCGTCAACAGCCTCATCTTCTTCCTTCCAA
CCAGTTTCTCGACAAAATACCATGTCTTCACACGATGGGGCTCGCTCTGCCCGTCAATCA
AAGAGATATTCTATGACTACCCTGTATCTTTCCATGTCTGCGAATGAGAAGGATTTGGAA
ATCGAGGATGATCTTGCGAAAGCACAAAAGGTTCTACGAGAGCTCAAATCGAAGATTTCA
TCACAGTCGAAGAAGAATTTCGTGTTGGAGAAAGACGTTAGGTATTTGGACTCGAGAATC
GCATTATTGATTCAGAATCGCATGGCTTTGGAAGAGCAAAATGAGGTAGCTAGTCATTTG
GAAGATGCGACCGACTTGCAAGAAGGTTTCTTCCCAAATGATGAGAAGACGCAAAAATAT
GGCAATCTTTTATTCTTGCTTCAATCAGAGCCCAGGCACATTGCACATTTGTGCCGCCTG
GTCACCATGGCAGAGATCGATTCTTTACTGCAGACAGTCATGTTCACAATTTATGGAAAT
CAATATGAGAGCCGTGAAGAACATCTTCTTCTGACTATGTTTCAGTCTGTCTTAACATAC
CAATTTGATAACACGCCAGAATATTCCTCCCTCCTCCGTGCGAACACCCCAGTATCGCGT
ATGATGACGACGTATACCAGAAGAGGTCCTGGGCAAAGTTACTTGAAGACTGTATTGGCA
GACAGAATAAATGGGCTTATCGAGCTGAAGGATCTTGACTTGGAGATCAATCCCCTCAAG
GTCTATGAAACAATGATTGCACAGATTGAGCTGGAGACGGGAGGACTCCCGGCCTCCCTA
CCCAGGGGAGTAACAGCAGAGCAAGCGGCAGATAATACACAGGTCCAGGCCATTATCGAA
CCGCGATTAACAATGCTTATGGAGATCGCAAATGGATTCCTTACAACAATTATCGACGGG
TTAGAGGAAACACCGTACGGTATTCGATGGATCTGCAAACAAATTCGAAGCCTGACAAAG
AGAAAGTACCCTGATGCCAACGACCAAGTGATTTGTACACTTATCGGAGGGTTCTTCTTC
TTGCGATTTATCAACCCTGCTATTGTCACCCCTAAATCATATATGCTCATTGATGGAACT
CCAGCCGATCGACCTAGACGAACTTTGACCTTGATTGCTAAGATGCTTCAAAACCTTGCC
AACAAACCCTCATATGCAAAGGAACCATATATGGCCAAACTTCAGCCGTTCATTCAACAT
AACAAAGAACGAGTCAACAAGTTTATGCTTGATCTTTGTGAAGTTCAGGATTTTTATGAA
AGTTTGGAAATGGATAACTATGTAGCATTATCTAAGAAGGATTTGGAGCTATCAATTACC
CTCAATGAAGTTTATGCTACGCATGCTCTACTCGATAAACACACGGCCGAACTCAACAGA
GATGAGAACTCGCATTTGGCAGTGATCTTGGCCGATTTAGGGCCAGCCCCTGCACAACTA
CCCAGAAAAGACAACAGGGCTATCAACTTACCACTGTTCAGCAAATGGGAAACCGCGATC
GATGATTTGACAGCTGCCCTCGACATTACCCAAGAGGAAGTATTCTTTATGGAGGCCAAG
TCAACATTCGTTCAAATCATGAGATCGATTCCGAGCAACAGCGCTGTAGCGCGTAGGCCA
CTTCGTCTTGAAAGAGTTGCTGATGCAGCAGGTCAATACCGAAATGATGCTGTCATGGTA
CGCAAAGGTATTCGGGCGATGGAATTATTGAGCCAGCTGCAGGAATTGGGGGTCATTGAC
AAATCAGATCAGTTCAGCCTCTTGCGGGACGAGGTTGAACAAGAACTTCAACATCTTGGA
TCACTTAAAGACGGAGTTATTCTCGAAACTCAAAAACTCGATCAAGTTTTCAAGACCATT
CGAGACCACAACACTTATCTAGTCGGTCAACTCGAAACTTACAAAAGTTATCTGCACAAT
GTTCGGAGCCAAAGTGAAGGAACCAAGCGAAAACAACAAAAGCACCAAGTCTTGGGTCCG
TATAAATTCACTCACGGCGAATTAGAGAAACAAGGCGTGATTCAGAAGAGCAACGTACCC
GACAACAGAAGAGCCAATATCTACTTCAACTTTACCAGTCCTTTGCCCGGAACCTTTGTC
ATTTCGTTACATTACAAAGGGCGAAATCGCGGTTTACTGGAGCTTGATCTGAAACTTGAT
GACTTACTCGAGATGCAGAAGGATAATCAAGAAGATCTTGACCTGGAGTACGTTCAGTTC
AACGTGCCAAAGGTTCTTGCTCTCTTGAATAAACGTTTCGCTAGGAAGAAAGGATGGTAA
>417d6c7b-5e7d-4547-acf2-45636d0ef375 (mRNA) 555 residues [BFAB_07:82142-82979 - strand] [cds] name=Bfab07g00185.1
ATGACCCGGGTACGAAGGGAATGGTGCAGAGAGCATAGTACATGTCATCTGTTGATACTT
CTGTCAAACCTCAATACACTTCCAACCCCTGTGACAGAGATGAGAGCTTCTTTGAGGTCA
GGAACTTCATCAAAAATTGCAGTCGTTCATAAGTCTCGGGCTGAGCTTTCCAACGCCTCG
AGAGTCACAATAAATGCCACATATGAAGCTGGTGATCTCCTGTCAAGCAAGACTACCAGT
TCGACTGTTGTAACAGGAGCTTTGATCGGGTTAAGCACCAATCTCGAATCAATAGTAAGC
CCAAGTTCCAACTCGGCACCTTCGATTAGCTCAAAATCGCCGCACCCAAGCCCCTTATAC
GAGTGCTGCTTACAAGAACTCCCTACTACAATCCTTATCTCACCCGATGACTCCGTGGAG
ACGATTATCCTCTCCATCGGTAAAGTAGAATACGTATTTGATATTCGCGACATGGACTTG
AGATATCTCAATATCAAACCAACGAAAAAAACGATGTACCGAAAAGTAAGGAGCGATCGC
AAAGTGAAGAATTAG
>cb150335-c1c3-4940-ab6e-098533742c36 (mRNA) 393 residues [BFAB_07:83161-83867 - strand] [cds] name=Bfab07g00190.1
ATGAATAATGGAAACCGCTCCGCAGTCACCTTTCACGACGACCAAGAACTTTCGCTCACC
AGCGTCGAACGGGGACCTTTATTCATCACTATCGATGGATACCGAGCTTTCGACTATCCA
TCTGTCGTCGATGACGAGGACGACCCACCCATCGGAGACCCTGCCCTCGAAGAACTCATC
GTCGACGACCCACCAGCTGAAGTACCCCTTCTTCAACTCCGACCACATACACAATCACAG
TCATCTCGATACCCACATATCATCTTGTTGATCCAGATCATCGAATTGATTGCTTTGATC
GGCATGGTTTTCTACCTCCTCTTCAATCATTTTCCTCCCAAACCCGTACCCACTCCAACT
AGACCGCCTCCCTCAACACCAGGCGGATGGTGA
>18db555d-1fc9-4f62-a3e0-b0b3e8462367 (mRNA) 543 residues [BFAB_07:84016-85170 + strand] [cds] name=Bfab07g00200.1
ATGCCTCGATTCATCAAGTTCCAAATTGACTGGGCCATCCATGCCAAGCTCAACAACGAC
ATTCTAGAGCAGAGTACTCACGGGAAGGGCGAAACACCAGAGGGTTGCACCTGTGATATC
TGCTACGAGCGGTTCTGCATTGCATCAGTTGATTCAGAAGATGCGGCAGAATGTTTACCG
TACTTCCCCGTCAGCAAAATCCTAGAGCCATCTCAGCTCTGCGATAGTGACTCCAAGGAA
ATCGAAGATATCTGGGAGTTCCCAGATGTTGACAAATGCAAGTGCCACTGTCACCGCTGC
CACATCCATCAATTCAAGCTGTTCTGCAAAGAATACAAAGAGTTGGTCAAGGAATATTCG
AAGCTCATGGTTGATTGGTGCTTAACTCTCAAATCTTCACAGCAGTTGCAGGACCTTCAA
ACTCTCAGAGAGCGACATCATCAATTCCGCAAGAGACTCAGCGACGCGGGATTTCGTCCC
AGATCTCAAAGATGCGGAAAAGTCGACTTCTCATCACTCAAACCAAGCGAAGGATGGTGC
TAA
>56b2a126-e9ef-4770-9275-f5f34600a5fd (mRNA) 1458 residues [BFAB_07:85330-87233 + strand] [cds] name=Bfab07g00210.1
ATGCTTTTTGTTTTCCGTAATTCCGCTCGAAGAAGTCTTCCACACCATACCGCCTTTGCT
AGGCCTTGGATCAACAGTTTGCCTACAAGATTATCAGTACGCCACAGCCCTTCAAATCTC
ACTCTGTGTCTTCCTACAATGGACCGGGGAATCAAAAGAAAAGCCAAAACTACCTCAGAG
TCGCCAAAGAAGACCATCAAAATTGATGGTTACTGCAGTACACCCGTCCGTCGTGCTTCC
ACAGGCGAAGAAATTTGGCCAGCGCCACGTGACCAACTAGAATCTGCCTACAAATTCGTC
CGAGAATGCGCGACAGCCCAGAAACCCACTCTTATTGTGCCGGATAAAGACGCAGATGGA
TTGAGTTCCGGGGTGATCATGTATCGTACTTTGATAAAACTCGGGCTTGAAGAGAAGAAT
TTGAGTGTTCATTTAGTGCGGAAAGGTTCGAATATCCATGAAGAATACGAAAGAAAGGCA
ATGTCAGAGATGAAACCTAGCTATGTGATTGTTTTAGACCAAGGAAGTCGAGGTGGTCTA
CCTGTCATTGATGATGAGGGTGCGAAATGTATGATTATTGATCATCATTTAAGTGATGAC
TTTCCCAAAAATGCCACTGTTGTTTCAGGCTGCCATTGCCCTCCAATCCCAACGACAGCT
CTCATGACCTACGAGATTTGCAAAGAACTTCATCCTGATATTGCTCAAGAATGTGGCTAT
CTTTGCGCAATAGGGACACACGGGGATCTGGGAAATACTATAAAATGGATACCCCCATTT
CCAGATATGAAAGAGACCTTCAAGACACATACTAAAAAGCTCATTAACGATTGTGTTTCT
TTGATCAACGCTCCAAGAAGAACTGGTACTTATGATGTTATTACTGCCTGGAAAGCATTA
CTCGGAGCCGAGGATCCCAAAGAAATTATGACAGACCAGAGGCTCATCGAAGCGAGACGC
GAGATCAATCAAGAAGTTGAAAAACGAACTCATACACCACCAAAATTTAGTAAAGATGGG
AAAATTGCAGTATTGAAAATCGAGAGCGAAGCTCAAGTCCACCCGGTTATTGCTACGCGA
TGGGCCGGCTTCTTGAAATCTAAAACCCTTGAAATAGTCATGGTAGCCAATTATGGCTAC
CTGCGCGGCAAGGTGAATTTCTCATGTCGAGTTGCTAGATGTGCTCGAGGCCGCGACCCG
CCAGTCAATATCATCGAGTCACTAAAAGCAGTAGCCAACTTGGATACTACAGATTTAGTT
GAGAGACTTGGAGAGAATTTTGCTCGTGGCCACAAGGAGGCATCGGGTGGAATTGTCAAT
TCTGCCGAATTCGAAGAATTATGTGAGTTAATGAAGGTTGGTGAAAAAGCCGAAAAGTCG
GAGCAAGAGGCATCGACAAAGAAAGTTGGAAAGTCGCCACAGAAAAACACGTTGAATAAT
TATTTCATGAAGTCTTGA
>56b41cf1-0733-4b2f-bdc3-c6b878176edd (mRNA) 1935 residues [BFAB_07:87167-89577 - strand] [cds] name=Bfab07g00220.1
ATGGCCAATGAATGGAAGTTCCGCTCTCGAATGCCCACCACCTCCATTGCTCGAATATCG
CAAGATCCTCCCATTCCACCCCAACACATCACCAAGCGTAAGCGTATCACCCGCGTAATA
ACCACTGATGCATGCAAAGAGTCCGGCATTATCAACGAGCTGCGTAAGAAATATGAAATC
GACCTCGAGCACCCCCCTTACTATCCTCCCAAGATCACGCTTCCTCAGCCACCTATTCCT
CGCCCAGAACCTGATGTGTTGAATAGTAAAATAAGAACTGAGATGGAAAGACGACAGTTC
GAACCATTGACTCGCGATTGGGTTTGGAGGGTCCTGTCAGAAATGTACAAAGTGGATGAG
AAATTATGGGGAAAATGGGCAATTGATTTGGATGGTGTAAAATTGGCTAAAGGCGATTGG
AGATATCTATTGAAGTCTCATTTTAATTCATGGTGCGAGAACGGGATGATGGAAGAGCAA
GAGCTTGGCCATGTGACGAACACTATTGCCGATTTATATGTTTACCTGGCTTGCGACTAT
AGGAACAGAGCAATAGCAAGAACACTCAAAGGTGGCGACCTAGCCGGTGATACACCAACG
AAACAAAAAATCAGTGCTATAATCATTGATTCCGACAAGTTGTACTGGGATCAAGATAAA
GGCCGCGTTTTTCAGCAAGGAGTTGATGAGGACGGGGAGCCTATTATGCGGATTAGGCAG
CAAGACTTTCCCAAAGCCTGGGAGAAAACCATGAAGGAACTGGCACAATATGATGACGAA
ACTATTGCAAACCTCGACTATATTGTGATTCCACACGAATATGGCGCCTTCCACACACAA
TGTATCGGAATAGCACCAAAGCAAAGGTTTATCTTCCATATCGACAACTCCGGTCTGTCG
AGAGCCAAATTTGCAAATACATTAGAAGACAATTTCGGATCTTACTATCATTCGTTTTTT
CAAATGTGTTTACTCGAAGCTATTATATACACAAGATTCGAGAAAGGAGAGATTGATACT
GCTGAGTGGCCATTATTCGGGCAATGGTCCTACCGCACGGATCATCAAACGGTAGAATAC
AGAACGACAGACAATAGTCCCAACGCAACTCGACAGAATGATTCATACAACTGCGCTTTA
AATACCATGACCAGTGCCGTGAATTTGTTATTTGGATATGATATGTCTTGTTATGCATCT
GGAAAGGATCTCTCCCCCGTCCCTGGATTAACAGGAAAGAGAATACGAGTGGCAGCGGAA
TTCCTAAATGGGGGATTCAATTACCCATTCAATTATCCATTGTTCAAGATCCCAACGGGG
TTACAAGAGCTCATCATTGATGAAACTTATAAGCAAAATATTCGACCCGCTCCTCCGACC
GTGCAGGCAAAGAGAGACACAGACGGCACAATCATAGACGTATACGATGGTGACGATACA
GATGAAAAGGCGGACCTGGATACAGAAGAGGGAGAAGAGGGAGACGAGGAAGAAGAGGGA
GACCCCCAAGCAGGAGCTCGAACAAAAGTTAAAAAGTCCACGCGTTACAGAAAGGTCAAA
TGGCGTGGCCAACCCGCTCTGGATTGGGATCCTGTAGAGCCAGATCCGTCAGGACCAGGA
TCTACAGACGACGATTTACCAATACGAACTCTTTGGCCTGTTCAGATGGATCCTACTAGA
ACGGGAAAATGCGGCATTATATACCCGATCACAAACCCACGCTTCTCGAATCCAATATAT
GATGATGTGTTTGAGTGCAAGAGGGCAGCCCAATTCAATAAAATGGAGGGCTGGGAAATG
TGGGAGGATATGCCGTTATATTTGTTTAAGCGTTGGATGGAAAATGTAATGGCAGGTAGA
GAACATGAAGAGTTGGCTCCATGGGTGAAAGTGCTCAAGCTTGATGCACCTATTTTCTCC
GAGACAAAATATTGA
>c292fae4-b912-4d9d-8765-7bf834435e8e (mRNA) 4080 residues [BFAB_07:90758-95772 - strand] [cds] name=Bfab07g00230.1
ATGGGAGACTCAAGCGTGATTTCAGGCCAAAGCAGAGGTTATCGCCTGGGTGTTGATGTT
GGGGGGACGTTCACCGATGTTTGCGTTTTTACACCAGAGGGCGATGCAATACGGACCAAG
GTACCATCAACTAGCCGAGATCAAAGCATCGGCGTTAAGAATGGTATTGTGCAAGTGCGA
GAGAAATTGAAGGCTTTGTACAACTGGGATGGTCAATTCGATGGCATTCATCACGGTACT
ACTGTTGGAACAAATGCAGTTCTCGAAGGCAAAGGTGCAAAGGCTGGATTGATTGTCACA
GCTGGTCATAAAGATATTCTGGCTGTACGGAGATCTCAGATACCAGGTGGTCTGGGAGCT
TGGATTAATTTCATGCCACCTGATCCTATAGTTCCTCTTGAATGTACAGTGCAATGCAAA
GGAACTATGAGCTATGATGGTCAGATTGTTACATCAATCGATGAATATTCACTTCGCAAA
GATCTTACACGCCTCAAGGAACGAGGCCTCGAAGCTATCACAATTAGTCTACTCAATTCT
TACCAAAACAACACACACGAGAAGCAGGTGGCAAAGATTGCAATGGAGATTTTCGGTCCT
GATGTTGAGATAATTTGTTCAAGTGATGTACTATCAGAGATGGGAGAATACGAGCGTACT
GTGACAGCAAGTGCTAATGCTCTCGTCAAGCCAGTAGTCAAGAAGTATTTAGCTAACCTC
CAAACTCTTCTTACTAATGATAGCGAGACCATTAGAATCTTGAAAAGTGATGGCGGTCTT
ACCACGTTAGACTTGGCCGGCGATCTACCTGTCAGCATCTTAATGTCTGGACCAGCAGGT
GGTGTCCGAGGCGTTGCAGATATCGTGGCTAAGAAAACCAAATATCGAAATCTAATAACA
TTAGATATGGGTGGTACCTCAACCGACTGTGCACTCATTTATGATGGCACTCCTGCGATT
AGAAGAGAGACGGTTGTTGACAATCTGACAGTAAGAGCTCCATCAGTGGATGTCAAAACT
GTTGGTGCAGGTGGTGGATCAATAGCACAATACGTTGAATTAACATCTACAATGCGCGTA
GGTCCAGAATCTTCTGGAGCCGATCCTGGGCCTGCTTGCTATGGTAAAGGCGGGAATGAA
GCGACTGTAACTGACGCAAATGTCGTACTCGGCTATCTTCCAGATAAACTTCTCGGTGGC
GATTTTCCACTAGATATTGCAGCTGCCAGGATTGCGGTCGAAAAAATTGCCAAGCAGATG
GGTCTTTCGATAGATGAAACTGCTCAAGGTATCTATAACTTGGTCAACGAAAAGATGTAC
AACGCTTTACGCAATGTTTCCGTTGAACAAGGTTATAATCCCGAAGACTTCTCACTCGTT
GCGTTTGGTGGAGCCGGTCCTCTGCATGCGAATGCAGTGGGAAAACTACTCGGAGCTTGG
CCAGTTATTGTTCCAATCGCTCCAGGTGTGTTATGTGCACAAGGCGATGCTATGACGAAG
TTGAGCCATGAACAGTCCATATCTTACATCAAAATTCTTACAGATGCCACAAAAAGTGGT
ATCTTTGATGCTCTATCTGAATTAAAGACAAGCTGTCAAGATGTAGTTCTTAGAGCACTA
AACCAGCCAAGCTCTCTTAAAGTCGATTACGAAGCAGATCTCAGATACAAAGGTCAGGCT
CTGACAATGTCTATCCCACTTCTCGTCGAAGATTTCGGACTTGATTCATTAAACTTTATT
GAAACGATTAAAGAACGATTTCACGCAGCTCATGAACAGCAGTATAGCTTCTGTCTTCCT
GATTTTGAACTGGAAATCATGCGACTCGGTGCAATTGTTACAGATGATTCCGCGGACGTA
GAGCTCAATTCTATCGGAATAGCTCCTCTTGACAGCATTCTCACACCTCCACAGGATGCT
ATCATTAGTCGAAAAATTATTAGTACCGATGGGAAAAGAATGGAAGCGATATTTTGGGAC
AGATCAAAGATCACAAAAGCTGGATATAAGGTTCAAGGACCTTGTGTGATATCCGAAATG
GATTCCAATACTCTCGTACTTCCAGGTTTTTATGGCGAAATTGATTCATATGGAAACATC
CTCATCTTTCCAGACGATGATACAAAATTTACTTCTAATATTGCCCATCATGATTGGGAA
AGCGCTCAAAATCTTGTTCAAAAGTCACCATTGATTCCAACTTTGATCTCCTCTTCATTG
CAGTCAATTAGGAATGAAATGGATACTCTTATGCTAAGGTGTAGTATGTCACCTGCCATT
CGAGATCAACAAGATGAATTTAATGTCATCACGAATAAAAAGGGCCAGATGTTAGTGGGT
CAATTTGGTAGCTTTATTACTCAGTTCCTGCAATCGTGGAAAGGGACTATTGAGGAGGGT
GATGTTTTCGTCACAAATGATGTTTATGAAACCAGTGGTGCTATAAGTCATCTCAATGAT
GTGATCGTACTTCTTCCAATCCATTACAAAGGGGATCTCGTGGGATGGGCGGCAAACTTT
GGACATATGACTGATGTCGGAGGCATGGTACCAGGAAGTATGTCTATTAACTCGACCTCT
ATCTTTGAAGATGGAATACAGATACCCGCCGTAAAGCTTTATTCTCGGGGTGTATATAAT
GCAGCGATGGTCGAAGTATTTTGTCGGAATTCTCGTCAACCGGATTGGTTTCGTAGCGAT
TTGACAGCCCTTGTAGCTGCTTGTAGAACGGCATCTACTAGAATCTGTGAGCTTAACGAA
AGATTCGGTCCCAACGTGTATAGTGCCTCTTGCGACGAACTTCTTGCACGAAACCGTTCA
GGCATCATGAAACTCATCGAGACTCAGATCGGTGACGAGGAAACCACATTCACTGATTTT
ATTGACGATGATGGTCAAGGTATTGGACCTTATGCAATCACCTGTTCCATGAGAAAAACA
AACGGAAAACTGGTCTTTGACTTCAATGGTACTTCACCACAAGCTGAAACAGCTATTAAT
TTCTATCTCTCCGTCACTATGTTCAAGATGTTTGTTGGGTGCTACTTACTCGCAGTATTT
GATCCATATTGTGTTGTCAATGATGGATTTCATGATATGCTTGAAGTCATCATACCAGAA
GGAACTATACTTCGTCCCGTGCGCCCAGCCCCTCTTAGCTGTCGAACTCACCTTCTAGGC
CGCACAATGGATATCATTCAGGCTCTCATGGGCCAGCGGTCGCCTCAATATAGTGCTGCG
GCTGGATTTTCCGACTCTCCGCATTTTTTCTACTCCGGGTTCAAGCCTAATGGTGAATGG
TATCAACTCTACCAAATTGGCTTTGGAGGTGTTCCAGCCCGTCCCATTGGTGATGGTCCA
GATTGTCATTGCTTGTTTCCAGCCATCAAATCTGTGCCCGCTGAGGCTATTGAGCTTAAC
TTCCCATTGCGTATTGAAGCCAATGAATCACTTGCCGATACTGGAGGCGCAGGATTCTAT
CGTGGTGGTAATGCACAAAGAACTTTGTACCGATTTTTGGCAAAAGGGGAATTTAGTGTT
CATGATGATAGATGGTTCACCAAACCGTGGGGAATTAATGGAGGGAAACCAGGTATGAGA
TCTTGGAAGAAACTGTATTCGTTGAACGGAGAGGAGAAAATTCTACAAAGCAAATGTGAT
CATGTAAAGGTAGTTCCCGGGGATTTGTTAGAGTGGGTTACTTGGGGAGGGGGTGGGCTA
GGGGATCCATTAACAAGACCGGCTGAGAAAGTTGCATTGGAGGTGGAGAGGAAATTGGTT
ACAGTTAATGGGGCTAAAAGAAAATATGGAGTGGTAGTCAATGAGGATGATTTCTCGGTC
AATAAGGAGGAAACAGAAAGTTTGAGAAAAAAGATGAAGAAATTGAATGAGGGAGAAGGG
GCAGTTTACAATAGAGGTGGTACTTTAGAGGAATTGAGAGAACGATGTGAGGAGGAGACA
GGATTGAAAGCTCCTATTCCACAATGGGAAAATGATCCATACGGACCACATACGGGACTG
GAGTATGTGCAAGAATGGTTCAAGGAGAAGAGGGAGATTAGAGGTTGGAAGTTGCAGTGA
>dccd0ad0-adf8-4b86-9082-e09866efa78d (mRNA) 678 residues [BFAB_07:96094-97199 + strand] [cds] name=Bfab07g00240.1
ATGGGACTTATCCGCAGCACCTTCACCACCGCCCTTCTCGGCGCCGCAGGTGCCACATCT
GGCTGGGCCTTTTGGACGCGCAATTCCAGATTCATCCCTGTCTCCCCGTCGGATCCGATA
TTTTCAAGTGCAGCCTACGTGCGACAAAACCCCAATCGCAATCCTGCTACGCAAGATTTA
TGTCAAAGAAAAGTGCCGCTGAGTAAGATAAAGCCGCATTTGTTAGAGAAGGAGGGAAAA
TTGGTTGAGGCTTTTTGTGCTGGAGTTTGGAGTGGTTTGGGCTATTCTTACCAACGTTCC
TACCTTTCAAAAAAATACCAAAATACGACTACCACCTCTCACCAACTCTGGGAACCTTCA
CAACTCCTCTCCTCCACTTATGAAGTCGGAACTCAAATAACCGACCATTTTGAAGTCGTT
TCCAAAACGCCAAGTTCAATCATCGTCCGCTGCGGAGATTCGCCTTTAGTAACCGGGGTA
AGGGACAGCGATGGACTTTTTGAGATGAAGGCTAGTGTTGATAAGAGTGAGGGAGTTGCA
GTCTTCGAGCTGAAGAGTGTGTTCTTTAAGGGAACCGGAAAAAGTACTAAGAAACCTATG
CCGGAATATGTAGAATTTGCGCATAGACTGTACACGAAGTTATGGATGGAAACAGCCGTG
AAAAATTGTGTTATGTAA
>99d66bb2-5b71-41b5-a2c1-768994a8845b (mRNA) 813 residues [BFAB_07:97262-98630 - strand] [cds] name=Bfab07g00250.1
ATGACTGGAAAATTTACACTCAAAGATCCGGCTCGTTGTGCCCACTATGCTCGATTCTTT
CAAAGTTTAACATTGGCCGAAGCGAATATCATATACTGGTCTTTGTTTGTATTCGTTCTT
ATTTTGATGAGTATATCGTCTATTCAACACCACAAATCAAATAACCTGACCGAACTCCTG
AAAAGTGACTCCACTTCTCGCCAAATTCGTCGCATTCGTCGTCGCCGCATACATTACCTA
TCGATAGTCTCTCTTTGTTTCATGATCGCTCTTATTTGTATCGTTCTTGAGGTATTCGCC
GCCTTCAATATCGAATACTGTGACGGCGAAGATCTAATTCAACTCTACTGGGGGTTTTGG
TCAATTCTTCAAGTCGGTTCCCTCATCGCTATTCTAGGAGTCATGCTGCAATTCTGGATT
GTTCTTGGGAACGTTCAAACACCGAGTTGGGCAGTGGCTCTGGGGACTCCTGTGTTGGTT
TTCGCTGCGTTGGGGTACATCTTCAGACATATTGGAAAAAGCTGGAGGTGGGGAAGAGGG
AAAAATCAGGAAGAGGATGTGGATGTCGAGGGTGGTAGAAGTGAAGAAAGCGAGGCTGAG
AATGAGGAAGGAGAGAAGAGGCGCAGTTGGGCTGAGAGGTGGATCACTTGGGCACCTGAG
GATCAAGAAATCAGAGATAGAAGAGAAGAGGATTTGAGTAAAGTGAGGACCATGAGGTCG
GCTGAATGTTCGGACATGGAGTTTGCTAGTAGAGCAACAACATTATACACACCAGGGCAG
CCAGGCGATGTCAGAAGGAGCTCGACATATTGA
>0935ca95-2cbd-498a-896d-9bb2f52b4924 (mRNA) 813 residues [BFAB_07:103568-106483 + strand] [cds] name=Bfab07g00260.1
ATGGCATCAAATAGCATAAAAACGACAGCACTCCGCGCTTTACGTACAAAATTGACATCA
ACAACCAAACCTACATTATCACCCATCCTCGCCAAAAACCGTGGTATCACAGGCACGACC
AGAAAATCAACCTCTCTTGACTCAACCACTTCTATACAACCCGGCACACCCTTTTTGCCT
AGAGATTTCAATGGCAATTTTCCCGTCTCCTTTTCCAAACCCACAACCACAACATCCTTC
AACACCCTGGTCAATTCCCTCACCACATCTCTCACCACAACATCCTCCCCTCATCTTCCC
ACTCTCACTCGCCTCCTTCACTCTTATGATTCCTCCTCTTTGTCCGACTGGCAGAAATAT
GCCCACGCAAACTCAAACAAGCAATACACAAGAAATCTAGTAGCAGAAGTGCCAGGAATA
TTTAATTTATTAATGTTGGTTTGGACACCGGGGAAGGAAAGTAAAGTGCACGATCATGCT
GCCAGTCATTGTTTGATGAAGATCATGAAGGGGGAGCTGAAAGAGACGAGGTGGGTTACT
CCTGAGGGAGGTGCAAGGACGCCGGAGGAGATGGATGTTGAGGGTGTGAGAGAATACAAG
AGGGGAAAAGTCGCGTATATGTGTGATGATTTGGGTCTTCATTCCATCGCCAATCCTAGC
GCAACAGAATATGCGATCTCTTTGCACTTATACACACCGCCAAACGCCGCAATGCACGGT
TGCCACATCTTCGATCCGTTGACTGGTGTAAAGACTCATGTAGCGCCTGGTGCTTATGAT
TCTGTCGGTGGTGTCGTTCATCCAAGCGCTTGA
>eaaedc48-5dc0-4821-9381-60a8b95084ed (mRNA) 642 residues [BFAB_07:107792-109260 - strand] [cds] name=Bfab07g00270.1
ATGGCAACTGATCTCCACGAAGTTATCCAAAAGGATCTAGATATTAAAGATAAAATCCAC
GTGGTTGGTCACGATATCGGTGGGATGGTTGCTCATGCATATGCAGCCCAGTTTCCTAAA
GATACGGCGTCTGTTGCGTGGGGAGAATGTCCTCTTCCAGGAACAGACGCTTATAACAAC
GCTGTTAAAGAAGGTATCACGGGAGGTCTGTGGCATTTTGTATTGCACTGGCAAACAGAT
TTACCTGAAGCTCTCACTGCTGGTCGAGAGAACATTTACATTAAATCTTTCTACGATCGC
CTATGCTACAATGCTTCGGCTTTCTCTCCAAATGATGTAGAGCACTATGCAAGTAAGTTT
GCTCAACCGGGTGGAATGCGTGCGGGGTTCGATTTGTATCGTGCGTTTCACCAAGATGCT
GAAGATAATCTTCGTATGCTGAAGGGTGGGAAGTGTAAGGTTCCAAGTATGTCTTTGATG
GGAGAAAAGAGTTTCTTGGCAACTATCGCGAATAAACAAAATGAACAGATGTATGAGACT
ACTTCGTCTGCTAGTATCCCTGGCTCGGGCCATTGGTGTGCGGAGGAGAATCCGGCTGGT
TTTGTGGAAGCTGTGCTTAAATGGACGAGCAAGAACTCGTGA
>49d5455a-feae-4a36-8ca0-84d5ef53fdf5 (mRNA) 1581 residues [BFAB_07:109613-111655 - strand] [cds] name=Bfab07g00280.1
ATGGCGGGGTCAACTTTACAGTTCTCGAAGCCCATGAGCATCAAAGAAATTTCCGCAAAG
GCCTCAGACTTCGAATTTAATCCTACTATCGCATTGAAATATTGGTTGAGAACAGCTGAT
ACACTTTTAAGAGAGGCATATATTTATCAAGCAGAGGACAACGATCAGCAAGCTTACCTT
TTGTTGATGCGATACGCTGCCCTAGTTGCAGAAAATTTGCCCGGTCACCCATCCGCAAAG
GATCCAGAAACTAGAAGTGCTCTCAGAGCTGCCCAGAAAAATCTCCCGGATGTTTTGGAC
GGATTAGAGAGATTAAAGCCCAGGATAAATGCGCGCTACAATGACTGGCAGAAGGCTTTG
GAAAGAAGGAAAGAAATCCATGCAGCGCAAGAAAATGACACATCGCGCCCATCGTCTCGG
GCAGATCTGGCGGCTTCTGATCCCGCGATAGCTGGAAATACAACCACATTAGGCGCCGCG
GAGAATAGCGACCTGGCCGTAAAATTGGCGCATAAGGAGTTTAGAAGAAGAGATGCTGCG
AGACTTGCTACAAGACAAGCAGGTGTTACTGAGGAAGAGGAGCAAGAAAGGCGGACTGCG
GGGCTATGGGACGATTGGGAATCGGCATTGTCTAAATCTGGTCGTAATGATGATGAGGAT
GTAATACGCCGAAATATGGAAGCTTCAAGGAGGAGGCTAGATGGCTCCCATGATATTTCG
CCAGATGGGACGAAGAAAAAATCTGCGGGACCTACACGACATGTCAAAACTAAGGCCAGG
AATGCTAGTAGCGCATACCGCTATCCATCTATCTCTAAGTCTCAACCACTCGTTAGTGAC
TCGGGACCATTCCCACCTCCCGGTCCTCTTCCCCCAAAGCCGCCCAAGGAAGAATTCGAG
ACGCCGCATTTCGATACGCCCCCCCCACGACCCGAAAAACAATCATCAGACACTCACGAG
ATTTCCTCATCAGATGTCGTTGGTCAAGACCCAAAATTCACTTTTCGACCTTCGGCATAT
CTCGAAAATGGCAAACCTCTTCGAACAGTCTTTCTACCGCCTACATTGCGACAACAATTT
CTGGCCTGTGCAGCCTCAAATACACGGGCGAATCTTGAAACTTGTGGGATGCTGTGCGGA
ACATTGATATCGAATGCCCTTTTCATATCTCGACTTGTCATCCCAGAACAGACGAGTACC
AGCGATACCTGTGAAACGACCAATGAAAGTGCCTTCTTTGATTACTGCGCATCTGAGGAT
CTAATGGTCTTGGGATGGATACACACTCATCCTACTCAAAGCTGCTTCATGAGTAGTCGA
GATCTGCATACACATTGTGGGTATCAAATCATGATGCCTGAGAGTATCGCAATCGTTTGC
GCTCCCAGTAAAAATCCTTCATGGGGAGTCTTCCGTCTGACTGACCCCCCAGGAATGCCC
GCCGTTTTAAATTGTAAACAAACGGGACTTTTCCATCCTCACGAGGAAAGGAATATTTAC
ACGGATGCATTACGACCAGGTCATGTCTTTGAGGCAGAAGGGCTAGAATTCCAAGTTGTT
GACCAACGGCCAAACCCATAA
>48fc6894-cb99-405e-90db-06f9883350de (mRNA) 2241 residues [BFAB_07:111819-114603 + strand] [cds] name=Bfab07g00290.1
ATGTTGCGCATATTCCCACGTTTGGGTAGGACCAATCTACTTAAGCATCCGACCATTTTA
CAACATTCGCGCCTTCGAGAAATCCATTGTTCGCCATGTTATAATATACCTCAAGCCTCT
AAATCCCCAGAACCCATAACACGTACCGATGTGGATCCCCCAGTCAAGCGAACGCACCGG
AAGGCTGTGACCTCAGGGGACATCACAGGAGAGGATGCTTTGGCAGTAGGACCAGTGAAG
CGTAGACCTAGAAAGGTTGCGGATGATGTAAAGGTCGATGCAAAGGATGAATCAATAGTT
GAGCCCGTAAAGCGCAAAAGAGGTCGACCCAGAAAAGTGAAAGAGGTGGAGGTGGAGGTG
GAGGTGAAGTCAGAATTGGAACCAGTTCCCAAAGCGAAACCTGTACCAAAATTGGAAGCA
GAACAAGAACCAGAACTAGAACAAGAACCAGAAGCGGAAGAAGAGGCTGTAGTAAATGAA
GTGAACGAAAGCGATTTCATACATATTCCCTTGGACCTCAGAAAATACATGAGAGATGCT
CACATGAAAGGGTCAATCATGGGGGACAGAACACGTTCGAATATCATGAACGAAGCACTG
TGTGATGATATCTTGGATCGCCTAAAGCCATCGCTTTTAAAGCATGTTGGCTGCGACGTC
ATCGATATAAATCCAGGCATAGGCATGTGGTCGTCTAAAATCCATAAAATCCTTAAACCT
CGAACACATCTCCTCATGGAACCCGATGCGAAGAAGTACAATCCTTTCCTCCAACCTCTT
CTTGATGCAGAAGATTCTACTTATCAACACATACCGAAATCTGGAACGGTCTGGGAACAT
CTAGGCCAAGTTACCACTCCGGAGTTCTTGCCCCATCAGGTAAAACTTTCGCGAGATGAT
CCCAAGATCAACGAACCGAACAATACCCTCCTCGTAATTGCGAATCTTGCCCACCACCCC
AGAAAGAGGTACCGCGGTTTTGAGTCCATTTCACAATTAGTTATGTATCAACTTCTTTCC
GCAGCAAGATCGCATGCCTTATTTCATCAATATGGCCTCATACGAATGCTGGTATGGATA
CCAGACGTAGAAAAAACTTCTTGGTTGGTACGTCATGTCGCCCAAATGCGTAAGAATGCC
GTGGAAGCACAAATAACTACGGAACATATTCAAGAGATTGCAAGCTCAACTGTAGATAAC
CACCGATTTGTAAGAGACGCCGAGGTTGCATTAGCAAATTCGATAGAGGTTGTCAGTAAG
ATGGATACAATGGGCATAACGACACCCAAACATAGGCAAGGCCCAATGGAGTTCAAAGCC
AGGCAGTCACTTGCTACAGGTGGGCACAAAGTAAAAAGCCAAGATTTCGATCGCTTCAAG
AGAGGCTGGTTCGATGAATTTAGGGATCTCCAGAAGCGATTGGATGAAGGGAAATTAAGC
AAATATACGACACCAGAAGGTGAGAAAGCCGGAAGTGCTGAAAAAGACAAACGAAAGAGG
GAGAAAAGAAATTATACAGAAGAATATGCACGCTATATCTTCCTTAAAGCGAAGAAAAAA
GTTATCAACCAACACGGAGAGCTGACACAGGATCTTGTCAATGACTACAACAACATCAAC
CAGCTTCACAGTAAGATCTTGAAAGCTGTTTCGGAGTCCAATGATACAGAGAGTTTAAGA
AATAAACTGGACACAATGATAAAGATGTATGAAGACAAGATTTCCCAGCTTCCTCTTGCT
GCTCAAAAGATCTACGGTGTCAGACTCGACGGTGCGCGCATCGGTACACAATTTGAGAAG
AGGCCAATGGAACCCCTCAAAGTATATCCGAAAGAATTTAGACCTGCTTCTGAGTTGTGT
CTTCTGGATATTCAGCCACAAGCTCTTTGGCCTATCCTTCGTCAGAATTACCCGGAGAAC
TATGATGTCTTCGAATACATAATTGGTAATATGTACGCACATCCGATTGATACAGTCTAT
GAGTCTTTGGAAGGATTATGGCCCGGTGCCCTAGAGCATATAGCAGGCGAATGTCCCTCT
TTAACAGATCCTTCGAAAGGAGGAGCATTTGATCTAAAGCATTTGTCTGTAAGATCCCTG
ACAACGGAAATGCTGAGGGAGATTGTGGAGGCATGGATGAGGTGGCCATTCCGTCCGAGT
CGATTCGAATTAATGACCAAGAGTGGCAGTATGGTACATGATCCAGATAGTCCTGATGAG
GATATCCTGGATGGCCCGTAA
>c58351a1-0f15-42cb-ad5d-0fc7cc754982 (mRNA) 762 residues [BFAB_07:115525-116792 + strand] [cds] name=Bfab07g00300.1
ATGGAATCTACAAAAAAATGGGCAGATGGCCCTTTCAAGCTACTTTCAACTCCGAGAGGA
TCGTTAGATGGCAAACCCGAATCGCTGGCATCCCGCAATGCATCAGAAATGGCCTTACTT
CATAATATCCTTCTTAGAGGTCTCAATTGCATTTATATCCAAGCGCCCAACGTGAAAGAG
ACCTTCGATATAGCAGATTTTATGAAATTCTGCGATGCATGGTCTTCCATTCTTCATTCC
CATCATGCCGCTGAAGAAACCATTTATTTCAGATTGCTCGATGAGCAAAGTTCTAGAAAT
GATGTTTTCATTAATAATCATAATGAGCATGAAAAATTCCTTCCGGGCTTGTTTGCTTTT
GATCTTTATGTTTCGGGAGTGAAAGATGATGCGAAACCTTATGATGGATTCAAATTGAGA
GAACTGATTGATGTTTTCGGACCTGATTTGGAGAGTCACTTGCATCATGAAATTGGCGTC
CTAGTGGACCTGGAAAAAGATGAATCAGTTGATTGGGAAGAATGTGGGAAGGCGATGGCT
CAATATTCGAAGAAAAATGCTGATAAAACGAGAGACGTCCCGTTCTTAATCACAAACTCA
GATGTGACTTATGAGTCTGGTATTCATGGGCCGAGATTCCCTCCCTTTCCGTGGTTTGTG
GGATTGATATTCAGGTGGATATACATCCCAAAGTTGAAGGGCGCGTGGAGGTTCTCATGT
TGTGATGATTATGGGGTGCCGAAGGAACTTCCTTTTGCATGA
>a17aee44-75f4-4090-be0c-2ed0b159ed93 (mRNA) 1128 residues [BFAB_07:116935-118379 + strand] [cds] name=Bfab07g00310.1
ATGTTCAATACTATGGCTGCAACTACTGGACAAACGGCAGATATTGCCACTGAAAACACA
CGTCGTGCTGCGCAGGAAATTCAAGACTATCTCCAAGCTCGTCTTGCCGACACCTCTGGT
CCTTCTTCATTCCGATCACTTCCAATTATCGATCTAACCCCTTCATTCTCGCCATCTTTA
GCCGACCGTCAAGAGGTTGCGAAGAAAATCAATGAAGCATGCGCGAATGTTGGGTTTTTC
TACATCACGGGTCATGGAATACCACGGCATGTTTGCGAACAAGTATTTAAGCTTTGCGAA
CGCTTTTTCAGCGAATTGCCTCAATCCTCCAAGGATGCAATCCACATGAAGAACTCAGAT
CAGTTTAGAGGATACGAGCCGGCTAGTTACTCATCTGTAAATGATTTCCAAACTAAGGAA
ACAAAGGAAGCTTTCAACTGGGGTTATGAGTATGGTTTGGATCCTACAGGTGGGGACGGA
AAATACGTCGAGCTTGATGGTACAACTGTTGGTGGTATAAACCAATGGCCCAACGAAGCT
GAAATTCCTGGTTTTTATCAAGGGATTGCAGACTATTACGGAAGGATTTTGGAATTGTGC
AAACACCTATTCCGCCTGTTTGCCTTGTCTCTATCTCTTCCAGAAGATTACTTTGATCCA
CTAGTCACACATCCTGGAGGGATTGCACGACTGATAAAATACAAGCCAAATGCCAACCCC
AAGCCTCTTTCTGCCTCAAATGAAGAAGAGGAAGTTGGTCTTGGTGCTCACTCAGACTAC
GAATGTTTCACTCTCCTTCTGCAAGACTCAACCCCCGGTCTAGAGGTCCTTAGTCCAGAC
GGAAAATGGGTCGCTGCCGAACCCGTTCAAGGAGGAATCGTAGTCAATGTTGGCGATTTT
TTGATGCGATGGACGAATGGACTTTATAAAAGTACCATTCATAGGGTTGTTAACAGGACA
GCCAAAACTCGATACTCGGTACCCCTATTTTTCTCAATCAATTACGATGAGATAGTTGCG
ACGTTACCGTCTTGTGTAAGTGATGAGAATCCTTCCAAATATCCTCCGATTACTGCTGGG
AGATATGTGTTGGATCGTTTGGCTATGACAGTTCCGGGGAAATACTGA
>3582fffc-2e7e-4306-83cb-46b39f3c328f (mRNA) 510 residues [BFAB_07:119074-119790 + strand] [cds] name=Bfab07g00320.2
TCTCTCAACGTCAAAGATATCTCGAAAACGATTCTCTTATTCCTCACCTCCTGGCTTACA
CTTTTCGCATCCACCAAAACTAATGCACCATTGTCATCTTCCCCCATTTCCCACATAGTA
TCCTGTCTCTTCGCATCTCATATCCCACAAGAACTCCCCTGTACCCCGTCCTTTGCCCTC
TCCATAATCCCCCTCAACACCCGTCTAAGCTACACCCCCTCAGCCTTTGCAATCCCTACC
ACAGTTCCACAAATCCAAGCCGCCGTTCTCTGCGCCGCAAAACATGGCATCAAAGTAAAC
CCAAAATCCGGAGGTCATAGCTACGCATCCCATAATATAGGTGGAGAAGATGGACATTTG
GTGATCGATTTGCGATATTTCGATCATGTGGTTCTGGATCCCGAGACGTGGATTGCAAAC
GTGGGGCCTGGGGCGCGGGTGGGAAACATGGCTTTGGCATTGTATAAACAAGGGGGGAGA
GCGATTGCGCATGGGGTTTGTCCGAGGTAG
>e2f1442d-e8e3-4715-8078-7f40b5a66512 (mRNA) 579 residues [BFAB_07:121088-122196 - strand] [cds] name=Bfab07g00330.1
ATGGTCTCAACACTCTCCTCCTCCTCAGGCGGCATTCGCGATCGCTCCACTGTCCTCCTA
ACCCGCACTCGCACAAAGTACCGCTGGCCACCTCTCCAATTGAACTTTTGGATTCTCATG
ATGTTAATTGCTTCCTCCACTATCCTCGGTATCTCCGCCTACTTTGTCTCTGTCCAAAAT
CAGCTACATCTTGGTGTTCCCTGGTATTTCCCTTACTGGATCGTCTCCGCTTCTCTCGGC
GTCGTATTCCTGATTATTATGCTCTGGCTCATCTCGCAGCGTCAATTGCTTCCTGGTATC
GTCATATTAGGGACTTTTATACTATTTGTATTATGGCTAGTAGGATTAATTGTGTGGAGT
ATTGAACTCTGGGGTCCTACGGGCAACGTAAATGGAAACTGCAATTTATATGTTACGGCG
AATGAACAAAGTGGCCCGTACTCGTCGACTTTGGCGTGGTTGATGCAGCATTCGATTTGT
CAGAGTTGGATTGCGGCGTGGGCGTTTATGTTGATTGGGGTTGTCTTTTTGTTCTGGATG
ATGATTATGAGTTATCAGGTTTATAGAATGGATGATTAA
>97b13a6e-d382-49ee-aec1-94b4f8011702 (mRNA) 987 residues [BFAB_07:122871-124974 - strand] [cds] name=Bfab07g00340.1
ATGACTACCACATCAATGGTTCAACCAAAATTCTTATCAAAGGCCGATCAACTTGGTGTC
GTCGCGGTTGGATTCTCCGGTGGACAATGTAAACCAGGAGTTGATGCCGCACCTTCAGCA
CTCATCAAAAGTGGTCTTCTGGATCAACTCGAAGAGGAACTAGGATACAAACTTCACCAT
GATAACACTGTTCATTCTTACAAGGAATTGATTCCTTCTGAGGATCCAGATCACCGAAAC
ATGAAGAACCCTCGTGGAGTCTCTGCAGTTACACAAAAGCTTTCTGAACAAGTTTACGAA
CATGCCAAGGAGGGTCGTTGTGTCTTGACTCTCGGTGGTGATCATTCTATTGCCATTGGG
TCGGTATCTGGAACCGCAAGAGCAATCCGTGAACGTTTAGGAAGAGAAATGGCATTGATC
TGGGTTGATGCACATGCCGATATCAACACCCCAGAAACTTCAGGCTCTGGAAATGTCCAC
GGTATGCCCGTTGCATTTTTAACGCGTCTCGCACAAGAAGACAAGCCAGAAATCTTTGGA
TGGCTGAAGGATGAGCATATGGTCAGCGTAAAGAAGATTGTTTACATCGGTTTGAGAGAT
GTTGATAGAGGAGAGAAGAAGATTCTCCGTGATAATGGAATTAAGGCATTCAGTATGCAT
GACATTGATAGACATGGTATTGGCAGAGTTATGGAAATGGCCCTCGGTCATATCGGTAAC
GATACCCCAATCCATCTTTCCTTCGATGTCGACGCTCTTGATCCTACATACGCTCCCTCA
ACTGGTACACCAGTTCGTGGAGGTTTGACCTTGCGAGAAGGTGATTATATTGCTGAGTGC
GTTCACGAGACTGGTTCTTTGATCGCTATGGATTTGGTAGAAGTCAACCCTACACTTGAA
CCTGGTGTCAATGATATTGGAGCACACGAAACTGTTAGAGCTGGATGCTCTTTGGTTAGA
TGCGCTTTGGGTGAGAGTTTGCTATAG
>e855061a-2dc6-44f1-9b00-3c8c02b8bcaf (mRNA) 447 residues [BFAB_07:125188-127032 + strand] [cds] name=Bfab07g00350.1
ATGGAGGCAAGTCATGATCCAGAGTGTCGAAGAGTCTCTAAAACAACCATAAATAGCCTC
GAATATCTCTACGACGGCGAGCGTATTACTTGTTTTGGGCACAGCTTCATAGAAATATGT
CTTGGCGATGATAATCGTAACAAACCTATTCAGTTCTGGAAGGCTCAGCTCGCATTCCGA
GGCTTTTCACCGAGAGAAAGCGATATCGAGGCTCTCAAGCAGCGTCTGGTTAATTCTAAT
ACCGATGAGCCGGATACCGTGGTCGAACAAGGTATTCAGAAAATGATGAGGGCATTTCGC
AAGAAGGATCGTGAAAATAAAGAGCCAGTGCACCAAGCTCAGCAGGCTCGACACGAGGAA
GAGGGTAAAGATTCTGATCAGGATTTAGTGAAAGACAATAACGAGGGAAAAGATCACTCT
GAAGAAATGCGACGACGATGCCGATAA
>18d56b61-d035-4fd2-adf3-247ddddbf7c7 (mRNA) 240 residues [BFAB_07:127604-128351 + strand] [cds] name=Bfab07g00360.1
ATGGATTTCGTCAAAAGTGCCCTCAAGAGTGGTTCAGGAAGCTCAGGAAGCACTGGTAAC
ACCAACCAAGCTGCTGGTGGCGCTGGAAAGGAGGATTATGGTGACAAGGCACTCGACTTC
ATTGAGAAGAAGTCCGGCCACACTTTAAGCCGCGATCAAAATGAGAAAATCACCGACGGT
GCCAGAGGATTGTATGAGAAGCAGACCGGAAACGCGGTCAACCCCAAGTTTTCCAACTAG
>c7573506-5307-4d90-8f4c-1a037be55259 (mRNA) 1233 residues [BFAB_07:129125-130577 + strand] [cds] name=Bfab07g00370.1
ATGACTAGCATAGAGGAACACATCGCCACAGCTGCAGCGCTTGGTTCCCTACCCCTCTTA
ATTTCTCCGTCAGGTGAAAACATTCTTCTCTCAATTGGATATATTCCTCTCCTCACAAAC
CATACATTAAAAGAAAAATCCAGAAAGGAACCCCGAAAACAAAACAGAGATGTCGAAAAG
AGTTCTCCGATATACTTCTCAGCACTCGAACTCGTACGTGATAATCAGTTTTTGCTACTC
GCCGGGCCCAGTGGAAGTGGAAAAACAACTTTCGCGAAACATCTTGCTTTTCGCATAGCG
ACTACCACTACGGAATCTATTGGAGGTGGTTTTATTGTGAGAAACAGTCCAACAGATGTT
CTGGATGAGTCTTGGGAGTTTGAAGGCATTGATATGATACCTTGCTATTTCTGCATCTCT
AGCGTTTCTCAGTTCTCGACATTGCTTCAGGAAACATTACCTCAGCTCATTGGGAGCTGC
AAGGATAGTAGCAAGTCATTTTGTCTATTGATCATTCTTGATTCTATCGAATGTCTTGGA
GGAGACGGACCGTCACTTTTAAAATCTATGGTTCATCTAATCCAATATCAGAAACAAGCG
TCCGTAAAACTACTCGTCCTTGGAGAAAGCAGCGTTGTGAAAAATTGGATTTTGGACTCC
AAAATAACAAAACATGATATATCACCACTTTCTCAAGTTAAGAGACGCATGTTCTTGCGA
AATATCACCGGCATAAATATTGAATACACAGATGTCGAGATCGGAATCGGTGGAGCAGCA
AGTCTCCCAGCATATTTTGCACTCGCATTAGAGACTTCTCACGGTGGAGAAAAAGCAGAG
GAATTATTAGATGAGTGGCTTCACGCCGTGCTTTCTGAGAATTATAATGATAGAAGAATT
ACACGAGAGGCACTGGATCATTCAATCCGGGAAGCGGAGCAGGGCATTCGAACTCCATTT
TCGTGTAAATTGAAAATCGCAAATCCGGCGATTTTCTCCAAAGCAATACAACACTTACTA
GCTGCACGACAACTTATTGAAGAGGACGCACAAATAGCCATTGATCTTTTTCATCAAAAT
CCCATTTTGTCAGAACCGATTATTCGCAGCTGGTTGGTTCGCCTTAGAGATGTAGGAAAC
CCAGAGCTACTTGCATCGCTTGAAGGTCTGGTCGCGGGCTGTGGAGTAGATGCGCAACTA
GGCGCACTGTTAGTTTCGAATTTCCTTCTTTGA
>65092d15-be05-4f97-a227-1edc1ea0c179 (mRNA) 516 residues [BFAB_07:130634-131374 + strand] [cds] name=Bfab07g00375.1
ATGGAGATTATGCAATATTCACCCAAGAGACAGAACGGAAATGGAATAGTCCAGAGCTCA
TCCCCTTCTACAGAAAACTTCCCAGCTACAGATCTTACCTGGTACGATGCGCACGCGTAT
TGTCCCTGGTTGACAACACGCTGGAAAGCATCTGAAAAAATTGCGCTCGATGAGGGAGTC
CGTTTACCGACTGAACCGGAATGGGAAATTGCTGCTCGAGGTTCTCAGACATCTGGCAAC
GAAACAGAATCGATGTATGCATGGGGCACAGAAAGGAACGCAGGATATGTTAATTATAAA
GATTTACTATTGAACGAGCGTTGTACCGTCGGTTTATTTCCTAAGAATATTTCTCCACAT
GGATGTTTCGATATGGTGGGGAATGTATGGGAATGGTGCAATTCATTGTGGGGTGAAGAT
TTGAATACATCATCTCTTCCATATCCTTATCAAGAAGATGATGGACGGGAAAATGTGGAT
GCAGATGCGGAAACCAGAAGGGTGATAAGAGGATGA
>4be680cb-125a-4cf7-a23c-c4ab38419381 (mRNA) 312 residues [BFAB_07:131531-132158 - strand] [cds] name=Bfab07g00376.1
ATGACCAACTCGGAAATCGAACCCGCGGCACAAAACCCTTTGGAGCTCTTGGTGCCAGTG
ATCAAAGAAATAGAGGATTATTCTTCTCGAGACATGGAATATATGAACAGGAGTGTTCAA
TCGTGGATCTCTGATCTCGACCATAACTTACCTACTGTATCCCGAGCTCGCCGGGACGAC
GCCTTGCTAAAGGTATGGCATAATGGTCGCGGATCTCTCGAAAGTTTTGAGAAGATTACT
TCAAGGATCGAGGGTTACCAGGAAGAAATGATAGCTCAGGGTGTAATTGAACATGATCAT
AACGATAATTAA
>c03f0bfd-63e9-4149-9f47-d0ffb8ac375f (mRNA) 4581 residues [BFAB_07:132904-138281 + strand] [cds] name=Bfab07g00380.1
ATGGCGGAGGGAGATGATTACACAATGTCGAGTTTGTCAACAATGTCGGAAACTGATTCA
CGGCCACGAACTGCACGACAGGATTCGGAAAACGAGGCCTTTACATTTCATAACATTGGC
GATTTAATGGCAGATAGAAGTGATAACGACGATTCAATGTCCATAAACTCGCAAGCTTTC
GAGCAGAACAATCGAACGGATTCTTACGACCATAGGAATTTACCTATTTTGTCCCCTCCC
ACTGATAGCAGTGTACTTTATGCACATAGCGACAACGGAGATAATCGAAGTGAAGGTCTG
CTGAGTGCCGTAGATGCAAAGGCAATGGAACAACACCTGGATAATGTCGAATCAAGTTTC
CTTCCTAGCGTTTCACCAATTGGTAAACATGGCAAGGCCGGTGCTGATGATACATATTTA
TTTGATGCGGGTCGGAATGGCGAAAAGTCCCCCGCAATGGAAACACAAACTCCCACGAGG
AAGAGATTTGCAATTAATGAAAATGAGGGTCATGGTTCTCCGACACCCTCTTCACCTCCC
ACGCCAGATGGTGCATACAAAACTCCAGGCCCTGCCCCTCGATATTCTGTGCAAGGAGAA
CACGATGATTCGGAACAAATTGGAAACACGACTTCCAACCTCGAAACTCTTTCGTCGTCC
CCAACAGCCGCTGCCGCTGCAAGGACCATATCTCGAGCAATGTCAATGGCAAGCATGGGA
GAGAATTCCGAAACAGCAGCACAATCTACTTCTCAATCACAGCAACAATCAGATGAGGAA
GAAGATATGGAAGCCACGCCCACAAGATCGCGCCAAAATTTACGTGCATTTGTCCAATCG
GTGAATGATAGCTCAAGCCTACCCAATGACTCATCGACTAGGAGTACAAACAAACATTTG
ACGGTCGATGCCGGTGCGACTCCAGGGGCCGCACTTTCAACGCGCAATACGTCTATACCT
AAGTTTCTCACCAGTCGACATTCAAGTCAACGATCTTCTGTTTCCTCTTTCATGACAAAT
TCTGAGATTCAAGACGATCGAAGCGATGTTACAGTTGGTGCAGATTATGCTTTGCAATCT
GGAGGCGCACTTCCTTCTGGGGGCTTATCTAGAAGTGGAAGTATGACTTTATCTAGGACT
ATAAGCTTGGGAAGTATGGCATCTGGTATTGACGAAGGTGGCGATTCATTTGGAAGAGTG
GAGGGACCATTAGCGACCCTGGCTGAAGAGGACTCAACTCGTGGGAGGAGTGAAAATCAG
ACAAATTCTGCTCCAGAAACACCTCGCGCATCTAGTCGACCCATGGACCCACCTACTGAC
ACAATCATTGCACGACATGTTCGCAATGTCCAAGTACCCGAATCAATGGCTAAAGACTTT
CGTACGAAGCATGGCGTGCATACACCCAGCAAGTCGGCGAGCTTTGCAGCATCCGCCCTG
GGCGGCCAAAGAGCCGGTAAAAATCTAACTTTGAAGGAACAGAGCAGCACGATCGAAAGA
TTATCTAAGGAGAACTTTGATTTGAAATTGAAAGTTATGTTTCTCAGTGATCGATTAGAC
AAGCTTTCTGAGGAAGGTGTGAAGGAAATGATATCCGAAAACGTTGAACTCAAGACAGGT
CTAGCCGTCATGCAAAGAGATAACAAAGCTCTCCGTAAAAAAGTAAAAGACCTTGAGAAA
CAACTCAAGGATGACGAAGACCGACCATCTACAGCTCGATCGGGTACATCTACAGAAGGA
AGTCAAAAGTGGTATCAAGAAGGCGTTTTTGAACGGGAGGAAGAGCTTCTTTACCTACGA
GAGAAAGTTGAAGAATATGTGACTGAAATTGAAAGGTTAAGGAATGAAAGTCTTGCTCGG
GAAAATGAGAAGAGAAATCTTACGGACTTGGTTCGCACAATGGGTGAGAGACGAGGTCAA
GATATCGAAACACGTGAAGAAATGGATGTCTGGAAAGATCTCCTTGAGCAAGAAACTGCT
CGCAGAGAGCAAAGTGATGATGAGATAAAAGTTCTCCGAGAAGAGATTTTCCGACTGAAA
TCAGAGACGGCTACCGGAGGACAAGGATTGAGTCATACGACTAATATTTACAACATCACA
AAGAGACGTGTCGGATCACCTTCGAGATCAAATTCCAATATGTCTGATCGCATGACAGAT
GATAGAAATGGTACATATAGCTCAGCAAGCACGTTAGCCGAGGAGATCAAACGGGATAAT
GAACAACTTCGACATGAAAATGCAGAGCTAAGACGAGAAGTTGGCGCACAGACGTCAATG
CTGACTTCAAGAAACCGCGAAAAAGAAAGGCTCTATCAAGAAATCGAGGACTTGAAGCTT
GGCCAAAGAAGAGGTGGTACATCGGTGGCTGGCGAGAGCATATTTGAACGATCAGCGTCA
CGGGCACACGAACGATCATCATCCAGGACTAGCGCGGGTACAAGACAGACGAGTATGAAT
GAGGCTGAACGGGAAGATTTCGAAAATAAGCAAGCCGAACTTCGAGACAGAATTAATAGT
CTTAAGATACATAATCAGGACTTACAACGTGAACTTGAATCTTGCATGGAAGATTTCGAG
ACCGCTGTCGAGCATAAGAAGGAAGCCGAAGGTCTAGCTCAAGAATTACAAGAAGCCTTG
GATGTTGCCGAGAATGATCTACTCACCATGCAAGCAGACCGAGATGAAGCACTTCAAGGT
CAAGAGGAAGCCGAACTGATGTTTGAATCTTTACGGAAAGAAGCTCAAGAAGAGCTTGAT
GGTTTTGCTGCAGAACAAGAGGAAGCCAACGCTGAGATAGAACGTCTTTCGGCTGAAGTC
GCTGATGAGAAAGAGAATTTCAATGCATTGCAGAATGAAATGAGAGAGATGAGTGATATA
GTTGTTAGGTTGGAGGATGATCATGAAAGAAAATCCAAAAAAATCCAAGACCTTGAAAGA
GAATTGGATGAAGCAAATAGAGAACTTGAGGAAATCGAGAAGAACTATGTCGAATCTAAC
GAAAAGGTCAATCGATTGAATGTGCAGCAAGAATCGAGTCAAAATGAAATTGCATTTCTT
CGAGAAGAACAAGATGGAGATAAAATCAAGATTGGGGATCTTGAGGCCGCTATCCGGAAC
TTGGAGAATGCTCTTAATGAAGAGCAAGAACGTGCTAGAGAACTTGATGAACGTCTTGAT
GAGGAAAGGCATCAAAGAGAAGTTGTTGCTAGTCAGGAAAAGCAAGAAGTTCAACAATTC
GTCAATGATCTTAATCGTGAGGCAACGACCGCCAAGGATGAAGCTAGAAGATTACGAAAG
AATCTCACTTCACGAGAAGTTGAGGCGGCAGAGTGGAAGCAGAGGCTTATGGAACTTGAG
AATAATCTCAGGGAAGCTCTTGGTGATCTGAATGGTACCAGGTCAAGTCTATTGAATTCC
ATCGCAAAACTTCAACGCGAACTCGAGAATACTATTCGAGATCTAGACTCCACCAAAGCT
TCTCTCGCCGAAAAGGAACGTATGATCAAACAACGTGACGACCTCTTAGAATCTCACGCT
CTCGAATCACGCAAATTAGCAGATATGCTTGACAAAGAACGACAAACCCATCGTCTCACA
AAAAATCAATACGAAACATCTCAAAAAACATCCTCTCACACAACTCGCACTCTCTCACAA
CAAGAATCTCGTGTTCTAGAACTCGAAACTTCACGTCAACAAGATAGGAGAAAAATAGCA
CAGCTAGAAAATAACTTCAAAGAACAACTTACAGAGAGAAATAACTTACTCCTGGGCTTA
TGGGGTAGACTTTCAAGTCTCTGTGGAACCGATTGGTCCCATAATAATTCCCTTATCAAT
GGTCGTGCACTTCCATCTCTCGAGGCAGTTTCTACCATGTTTCCAGGTTTCTCCAAGAAC
TTGTTAGCAGCAGTCAAAACAATTGAAACGTTAGTGGGTGATTTCAGAGGAAGAGTCAAG
GATCTCGATAGAAGGTTATGGAAAGAATATTCGACACTTGAAAATCGATTTGAGATGCAG
ACTAAGAAATTGGATAGATTGGAAACGATGGCGAGGAGTGCAGTGCCGTTTAGTAGTATG
GATAGTAGGGCGGAAGTGGTCAAATTGAAGGATTTGAATAGGTCTTTGAAAACGGAAATT
TCGAGTCTCAAGGCTGCCAATGATGTTAGATCTAGCGCTTACGAAACTTCTACTTCGCCA
TCACCATCTATTCCCACTGGACCTCGTCGTCGCATCGATAATTCTCTATCCAGATCATCG
ACCATGACACGTCACTCCTCTGCAGCTTCAAATTCTCGATCTCAATCTCAAGCAAACGGG
GAGATGAATACACCAACACGTGCAAGCACAATGACGCGAGTTGAAAGTAGTATAGGCGAT
CCGAGAGAAGAAGAATATAAACCTGATTTGCGCTGGCAAGTTAGATTACAGGAATTGGAA
TATAAGTTGAAGGCGGAAAGAGAAGCGAGGAAATTGGATCGCACGAGTGCGGCGCAAAGA
TTGAGAGAGAAGGATAGAGAGAATAAGGAATTGCAGGAGGAGATGGAGAGGGGAAGGGTT
AGAGGAGAGAGGGGAAAGTGA
>3556bdb0-5515-43b4-b92a-9a97eb10f684 (mRNA) 1920 residues [BFAB_07:138785-142264 - strand] [cds] name=Bfab07g00390.1
ATGCCAGTATCGTCACCCATTCTAATGGCTTATCCTGGCCCTCCGAGAAGAGCTGGAGGC
TTCATCCGATATATCATTGGCGCCATAGGAATCCTTCTCCTGGTCTTGTACTTTAGAAGT
TCGTCGGAATCGTCATCTTTCACATATACAACCCCCACAGTCCCTGATCCTCCAAAATCC
ACATTATCTCCCACGCCATACGCGGAATCTTCTTCTAACAATGAATTACCCATTTCCAAA
CCAAATCAAGAGCATCCGATCGATACTTTAATCGCCAATGCAGAAACGACTTTTGAAGAA
TTGTTGCAAAAAGAAAGTCATGATGTGAATGCCGCCGCCGCCGAATATCGCAAACGACGA
GGGAGACATCCACCTCCAGGATTTGATGCGTGGTTTAAATTCGCTCAAGACAATAATGCC
GTCATGGTGGAGGATTTCTTTGATCAGATATATCATGATCTAGGTCCATACTGGGGAGTG
ACGCCCGCAAGGATGAGAACACAAGCTAGAGATGCTGGCATGGTGATCAGTATTCGAAAT
GGCAATGCAACGGCAGATAGTGATTGGTTCTGGACACAGATTTGGTTGCAATTGATTGGA
ACCATACAAAAAGATTTGCCAGATATGGACATTCCACTCAATGCTATGGATGAACCAAGA
ATGGTGGCTCAGTGGGAATTGATTAATGCGAATATGGAAGTTGAGAGAGCGACGAGGCAA
CTTGCAGATATCAATGTAGTATCTCAGGATTATGAAAGTTTGCCAGCTCCAAGACGTTCT
GGAAGTGGAGAGCCAGACGCTCCTCGAAGAGAGTGGGAAACTTCAGGTCCGTTTTGGAAA
ATTGCTACCAGAGGTTGTCACCCAGATAGTCTTGCACGTCGAGCGGAAGTTATGACTGAC
TTTTCGAAAACGCCTGCTATTTCGATGGGCCATTCTTCTTTACATACTTTTAAAGGTTAT
GTTTCGAATTACAGTCTCTCGGCCGATTTTTGTCATCAACCAGATTTGCAATCTCTTCAT
GGAATGATGATAAATCCTCTCTCGATCTCTTCCACTCAAGAATTGTATCCTCTGTTCGGT
GGTTCCAAACTTCCAACGAATAACGAAATTTTATTACCAGCACCCATGTATTGGGTAAAA
GAAGAGAGATTTACAGGTGGTGATGATCATGGGGTTCCGTGGCACGCAAAATTAGATAAA
GCCATTTGGAGAGGTGTCGCTACAGGAGGACGAAACAGAGAAGATAATTGGAAAGGATTC
CAACGACATCGCTTCGTCTCCATGACAAATCACACATCAGTATCTCGAGCCGAATCGTGG
GAAGCGATCCCTCCCAATTTCGCTCTTCCAACTTCGATTTACAACATTGGTGCACAACAA
GAAAATAGATTGGGAGATTGGGTAAGTGAATGGGCTGATACAGCATTTATCGAATTGATG
TGTGATGAAGACAGAAAAGATGGAACTTGTCCTTATACAGATCCATATTTCTCGATTAAG
GAAGGACAGAAAATGAGTCAACAATTCAAAAATAAGTATATTCCTGATATTGATGGCAAT
TCTTTCTCGGGAAGATATAGGGGATTCCTACTTTCTTCGAGTCTACCAATCAAAGCGACT
ATTTTCCGCGAATGGCACGATTCACGACTTATTGCCTGGAAGCATTTCGTACCGATGGAT
AATCGATATATGGATTTTTATGGTATCATGCAATATTTCCTAGGTTATGAAGGAGATAAC
TTTCGAATTGAAGGACACGATAAAGAGGCGGAGAGAATTGCAATGGCAGGACAAGAGTGG
GCCAATAAAGTATTAAGGAGAGAGGATATGCAGATTTATGTTTTGAGGTTATTGTTGGAG
TACGCACGCGTCTCTAATGATAATAGAGCGAATTTGGGATTCGTAAAGGATCTCTTGTGA
>4e8789e5-51ae-446f-8ed3-b95421c27908 (mRNA) 936 residues [BFAB_07:151444-152875 - strand] [cds] name=Bfab07g00400.1
ATGAACGCCCTTATTGAGTCATTGACAAACGGTGATGACTCCAGTCCCCATCAAGGAGTC
CTAGCCTACAGAGCCCCCTCTCTCCTCCAACCTCACAGAGCCCGTGATGCTATCCGCGAT
GCTCACGATGGAAAGATCGCACCACTAGTTGGATTCTTCGTTGCTCTACCGTCTCCACCT
GTCGCAAAAGTAGCAGCTCAATTGGGCTATGACTGTGTATGGATTGATTGGGAACATACT
TCCATGAGTGTGGAAACTATGACCCAAATGGTTCACGACGTTCAGTTCATGAGTGAGGGG
AAGAGTTTTGCAATTGTTCGTGTATCGGGCCATGATCACGCATCGATAGGGTATGCCCTA
GATGCTGGTGCCTCCATTCTCATCCCCCAAGTCGATACAGTAGAACAAGCCAAGCAAGTT
GTATCATCTGCCAAATTCGGTGCCATTCGAAATGGTACTCGTTCAGCACCTCCAGCTCGA
TACCTAATGGGTATCTCGGACACTCCTATTGATTCCTCCAAATCTATCTGGGAAAACGTA
AATAATCAAGCCGCCGTAATAATACAAATCGAAACTCTCCAGGCAATCCACAATCTCGAT
GCTATTCTTACCGAATGCGGCGAACATATTGATTCTGTCTGGCTAGGCTCATTGGATGCG
AGGATTAGCATGGGACTGCCTGGTATGGGGGGCTCGGAGAAGGAATGGACTGATGCAGTT
GCGCTTTATGAAAGTACATTGGCCAAGCATAACAAACCTTCCAGCGGACTGGCTATGGGC
TTTAACGTGGATGATAAGATAGCGATGGCAAGAGGTAAAAGTTTGGTAGTCAGTGGGAGT
GATATCTTTCCGTTGATGATGCAGGCGACTGAGGCAAAACAAATGCATGCAGGTTTGAAG
GCTCACGATCATAAGGGAATTTACAAGATATTGTAA
>adc04922-1de7-46a7-86a2-12685ba47c3a (mRNA) 741 residues [BFAB_07:156820-157799 - strand] [cds] name=Bfab07g00410.1
ATGTCTCTACTAGAAAGACATCTGGAACAGATTGCTCTGTCGGCAGATTCAATAGCTTCC
TTACCCTTTCCCCCTCCTCAGATCTTTACCAATGCTCTTCTCTCCAACCAAGACATTACC
GCCCTAATTCGCGACACCGAACCTCACGAACGCGCTCTCTTTTCTGTTCCTCCACCCCCA
CCACCTCCAACCCAAATAGCTCCCGAGCCCAAACCATCCAAGTCCCGTCGCCAAACAGTC
TTCAACGTAACATCCGGCGAAGTAGCCCCTGCATCTGGTCCTAACGGTCGAGCACCTCGA
CGGAACACTGCTGTCGCCGCTGTACTTGGCGCAGAATTGCATTCTCAGGTTCGCAAAACT
GAGACGGGGAAGGGGGAAATTGATATCGAGGTTTTATTGAAGGGAGCGGAGAAATTAAAT
GGGGTATATCCTGTACAAGGGGTCCCTGAGAGGATAAGAGGATTGAGAAGTAGATATGCA
CAATTAAGAGAGAGCTTGAAACGACACGAACAGAAGGTGCAGAAACAAACGAGAGAATTG
GAGAGGATGAATAGGGGGAATGGTGCTGAGAGTGGTGAGGAGGAGAATCAGCAGGTGAAT
GAGGAACCTTCGGAGATAGAGATCACGGATGAGGATTTGAGGAGAGAGGAGAGAGAGATC
AGGGAGCTGGAGAGGAAGAAGAAGGCGTTGGAAGAGAGAGTAACTGGGATGGAAAGAGAT
CTAGGAGGACTACTGAGATGA
>9e1e57cf-072b-46a1-aa8e-f4971cd22a2a (mRNA) 933 residues [BFAB_07:159382-161017 + strand] [cds] name=Bfab07g00420.1
ATGCGACCTACGACTCCCAATTTCAATTTCGCTCAAAGTGTCGGCCCTTCGTCACCACCC
GAGACCCCGACTAATTCCACCTTTGCCTTTGCACCTCAACGACCATCAATGAACTTTCCC
CGTTCATCGCCTAAAACAAATGGGATTATACCCAATGGTCCAGGGCCTCACTTCAGCTAC
AATCGAGTCGAGAACTTATCTCCACGATCTACTTCTCCCTCGTCAGAATCTTCGGGCAGC
GCAAGTCCGCCGCGATCAGAGAGTTCCCAACGCGCGCAATCACCACTCTCATCGCCTATC
CACAGGCACTCGCGAGTAGTAGAAAAGGGAAATTTCACACTGGAAGAAATAACAGACAGC
GATCTCGAGGGCTACGATTGCGACGAGGGACTTATAATACGACCCCACCAATACGAAGAC
GCCGAGTCCGATGGAGGACATGTTGCGCCTATATCTACACCAGCCGAGCTCGATGCACGT
TTCCTCGATGATTTACGCGATCTCACTGCACACGACGGCACGGACGCATTTAACAACGAA
GAGCAAGATGGCTCCCCATTGGATGAGTACGAAGCTTGGGTACAGCGCAATCGGGAAGAA
CGTCGTCGCCGTCGTCGCAGTTCAGCTACTGTACAAAAACGATCACTAGCGCAAAGTATT
GGGAGTGATACTGACGATGAGGATTTAAAGCCAGATCACATTAGCGCAAATGAGGCCGGA
TCTAGTGCTAGGAGACTACGAAGAAAAACGTTTAATCATGGGGGAGACAAACGAGCGAGT
CTTATATTTGACGATCCACCACCCCGGATTCCAGAATTGGAAGAACCAGATAGTTGCGAG
GAAGTGCTCGAAGATGATACAGAATTGGATGATTTAAAGGAGTTGCCATATTATGTTTTG
GATGAATCTATGGATATCGACTCTTCTTCTTGA
>9f7d58c3-8c4d-4c48-8e4c-eae9c08e2455 (mRNA) 2109 residues [BFAB_07:161862-164706 + strand] [cds] name=Bfab07g00430.1
ATGAATAATAATATCCTTCCAAACCAGGGTCAGCCTGGGGGTTCGCAACCTCCTCGACCA
CAGACATTGTTCAAGCCCGAAATGATGCGCCAACTACCTGCGAATGTTTTTACAGAAGAG
GAGAAGGTTAAATGGGAACATGGATTGAAAGGACTTTGGTCTCATATTGAAAATAACCCT
CCTGAATCATCAGCACATCAAGAAGCCAAGCGCAAATTGGTTGAGTTTTCGAAGTCAGTA
TCATCCAGGATATTGCAATATCGCACGCAGCAGCAACAGCAACAGCGCCAGATGCAAGCC
CAGCAGAACCAACAGAATCAACAAAACCAGCAGAGTCAGCAGAACCAGGCGCAAGCTCAG
CAGGTTCAACAGAATCAACAGACTCAGCAACAGAATCAGCGAAGCCCGCAGGCGCAACAA
GCATCACAACCTACAACCGCTCCATCAAATGAGACACCTCAACAAGATCCAGCTTCACAA
CAGCAGGAACAAGCCACACAATCACAGGATAATCAAGCGACTGGTTTCAATGCTGGAACT
TCTTCTCAACAACAAGCAAGGCCTCAAATTGCTGCTCAAATACCAGAGAAGATCCTGCAA
CACGTCAGAACATTTCCATGGCATGCCCCACAACACCTAACCCCACAATCACCAGAATGG
ACTAAATGGATGGCGGATATGAAGAACAAGTATGCAAAGGGCTTGATGCAGATGGAAAAG
ACAAATTTGCAGGCGAAGAGTATGGAAGATTATATTAGAAAGAAGAGAGAAGAAGGGACT
GCAACGGAACAAGATGAAGCAGACCACCAGACGAGATTAGCAGAGGTTAAAAAACAACAT
CATATGGCCAAGAAGTTCGTAGATGACATTAGAGAGGGTCAGAAACGTCTCGCGCCAGGA
AACCCTCATCAAGGTCAAACTCAGCATCCTCAACAAACCCAAGCTCCTGCGCCTGGGTCA
TCCAATGCAAATGCGAATGGGAATGCAGATGCTACTGCAAGCCAGGGCAACCAAGGAGCT
CAAGGTACCACCCAAATGAATCAAACACAAGGAGCACCTAGGCCACCTATGAATTTGCAG
CAGCCACAAAACCCAGCCTTACAGAATACTCAGACTGTCAATGCTGCTATTGAGCAAGCT
CGTAACCAACAAATGGGTGGTGGTAATCGACCTCCTGGGCCACAAGGACAGCCATCCCAA
GGTCCACAAGTTCCTACGCCAAACGCACCTTCCCATCCACCTATGCCTCAATCTCAACCT
GGACAGGCGCAAAGTATTAAAAGCGAGCCAACAATGCCAGGTCCAATCAACACCGCCATT
AATCAAATGCAAAATAACCAGCAACGTCCGAGTCAAACAAATTCTCCTCAATCGGCTATT
CCTCAATCAGCAAATTCTATCAGTGCACCACATCCACCTGGACCTCCGAGAGCTTTAACC
CATCAAGCGGCATTGCAAACTGCAGCTCAAAGTTATTCTAGCGCGGGCGGTCAAACGACC
ACACCTAATACGGTCATGGGTCACTCGCACACTCACCCTAATACTATGCCCAGGGAACAA
CAAAATCCAAGCTCAACGAAACTTCCAATTCCAAAACATTTGCCAGAAAGAGCAATCGCA
CCCCCACAACCTGTCCAAATGGGCCAATCACGTCCTTCATTTACTGGTGGTCCATCAGGT
GCTGGTAACGGAGTTATGGGTCAGCCAGTTATTGCCAAGACTCCAGGTTACGTTCTGGAT
GGCGAGGGAGACCGCGTTTTGAGTAAGAAAAAATTAGACGAGCTGGTTAGACAAGTGACC
GGTGGTGGAGAGAATATCGCAGGTGGTGGTCTGACTGCTGAAGTTGAAGAGTCCATCCTT
ACAGTCGCCGATAACTTCGTCGATCAAGTCCTTCAAGCCGCATGTAAGAATGCCAAGGAA
CGTGGCTCCAAAATTTTGGAGATCCGTGATATTCAACTCACTCTTGAGCGCGGTTACAAT
ATTCGTATTCCAGGTTACGCTAGTGATGAGATTCGAACCGTCCGTAAGATCGCACCAAGC
TCTGGATGGATCAACAAGATGAGCGCCGTTCAAGCTGCGAAGGTCACGGGTGGAAAGGGT
AGTGATTAA
>3d30966c-218d-4d6e-9ffc-990699178529 (mRNA) 1740 residues [BFAB_07:165255-167752 + strand] [cds] name=Bfab07g00440.1
ATGCCTGGCAAAACACCATACAAGAAGGGCACCGATCCAGTCGAAAATGGTATCAACGGT
ACAAAGAAGGATGATGCAAAGAGCTCATTGAAGGGTGAAAAGGGAAAGAGGACCAAGGAA
GGCGAGGAGGAGATGACAGTCGTCGTACCACCTTCAAAGAGTTCGAAACTATCAGCTCCT
CCTCCGAAAGACGGTGATGGAGATGTAGCTATGGATGGCTCTGCGGAGGGTGAAGAGGGC
GCAGGTGTTGAGAAGGTTGATCCGGTGGCCAAGGCTGTTGCAGATATCAAGAGCAATTTC
CCATTATTAGAGAAAGCTGTTGCTTTGTTTGATGCTAGATACACACTCCGAGCCCTCAGA
TCTATTTCCTCTATTCGAAAACATCTTACAGCTGATATTCTGGCGCAAGTTATTACAGAA
ACTTACCCTACAGCAACTCAACAAGCAAAGGCTTTACTCATTGGTATCGACAGAGAGAAT
GCCGCATTTAACAAGGCATCACCAAGTGAGATGGAAATTGACTCTGATTCAAAATCTGCC
AAAAACGGGAAGAAGGAACCGAAAGAAATCATTCCAGAGATTGATATTTTCCTAAGCATT
CTCGTACAAATCTTCTTCCTCGATAATAAGATGAATGAGAAGGGCTTCACACTTTCCAAG
CATGTCACAACAGTCATTCATGGACTCAACCGCCGAACTCTGGATTCTCTCTCCGCTCGC
GTGTACTTTTACTGGTCTTTGTTCGCTGAACAATTGGCACCACTTCCACCTTCTCCCGCT
TCCCCAATTGTTGCTATTCGACCAGCCCTTCTTTCTGGCTTACGGACTGCTGTTCTCCGC
AAAGACATCGACACTCAATCAACTGTTATCGTACTTCTTCTACGAAATTATCTATCAACC
TCTCATATCACTCAAGCTGATCTTCTCATCTCGCATACTAAATTCCCTGAAAGCGCCTCG
AACAACCAAGTTGCAAGATATTTATACTACTTGGGACGAATCAGGGCCATTCAATTGAGA
TACACTGAGGCCCATGAACATTTGACAGCCGCAACTCGCAAAGCTCCTTCAAGTCCGAGT
GCTGCAGGATTCTCACAAACTGCGACGAAGTTACTTCTTGTGGTTGAGTTGTTGATGGGA
GATATTCCTGACCGTGCAACATTCAGAATTGCTAGTCTCGAGCGTGCTTTACAACCCTAT
CTTAACCTCGTTCAAGCAGTTCGAGTAGGTTTGATTGCAGAATTCGAGGCTGTGATTACT
CAACATGCAGAGACTTTCAGACGTGATGGCACTTATACCTTGATCCTTCGTTTACGACAA
AACGTCATTAAAACTGGTATTCGAATGATGTCCTTGTCCTACTCAAGGATCTCTCTTCGA
GATATCTGCATACGCCTGAAGCTTAACAGCGAGGAATCTGCGGAGTATATCGTTGCAAAG
GCAATTCGTGATGGTGTCATTGAGGCAACTTTGGATCGTGAGAAGGGATTCATGAAGAGT
AAGGAAGTTGGAGATGTTTATGCTACTAGGGAGCCTGGTGAAGCATTCCATGATCGTATT
CGTGCTTGTCTTGCTCTTCATGATGAGAGTGTTAAGGCTATGAGATTCCCAATGAATCAA
CATCGATTGGAACTCAAGAATGCTCAAGAAGCAAGAGAACGCGAACGCGAAATGGCAAAG
GAGATTCAAGATGGTGATTTGGATGAAGATGACCTTAGCGGAGACTTCGAAGGCATGTAA
>3aecfbaf-852c-45eb-b78b-23bca0ea8aac (mRNA) 2184 residues [BFAB_07:168133-171120 + strand] [cds] name=Bfab07g00450.1
ATGCCACCACGAACCCTCCGAAAACGCTCGCATAGAGCAAGCTCACGCGATCCGCATTCT
AATACAAATATGAATGCAGACCCGAGCGCAAATGCAAATACAAATACGACTGGTTCACCA
AATACAACCACGGTACGAACTACGACGACAACTACTACTACAATGATGGTTGATAAGGAT
GGTGTTGAGGTTGAGGGTAGTAGGAGAGTTAGTGGGGGGAGGACAAGTACTGGTGGGAGA
ACAAGTATTGGTTCCGGAGAGAAAAGACAGAGGGGATTGGCGGAATTTGGTATTACGAGA
AGTCCGCATCCGCAAGGAAAGAAACGCACGCGTGAGGTCGAGAAAGAGGAAGAGGGAGAG
GGAGAGGGAGATGAGGTTGGGAATACTGTGAATGGTGGAAGCATGGCGAATGGAACGAAT
GGAACAATAATTGGTCCAATGAGCTCTACCCAAGATCAAGAGCATATAAATACACCCAAA
CGCAGAAGAATCAGCACAACAAATCGTGTAAACGGCTCGATTACTGTTACCGGAACCGGA
GGTAGAGAAACACCAAGGGAAAGAACTAGGGAAAGAGATGTTACAGTCAGCATGGAAAAT
TCACTGCCGTCGCCGCCTGCTGAAGCAGGCGATAATGAGCACAATGTGAATTCGGTGGAG
GGTGATATTGGAAGAAGTTCCCCCTTAGAAAATAATAGGGCTGGAAGTACTGGTACAGAG
ACGGAGACGGCAAAGAATGAGAAAGAGAATGAGGAAGAAAAGGATGAACAAAGGGAAAGA
AATATCGATGAAGTCGTTTTTGGAGATTTATGCTTCAAGAGTTGGTATTCCAGTTTTTAT
ACCCGCGATGTCGTCGGAAATGGAATGATAGAAAATCATTCTCAGAGTGTTAGTCAAGGA
AGTGGGAAAAGCAGTAAGAGTGGAAAAAGTGGAAAGAGTGGCAAGAGTGGAAAGAGTGGA
AAGAGTGGAAAAGGGGGGGAGAGAGATTCGAGAGGACCAAAGGGTTTGCAGGTTGATAGA
TTATTTGTCTGCAATTGGTGCTTTGGATATACAGTCCATGGGGGAGAAATGGCGAAACAT
AGAGAATGCTGTGAGCGTGAAGGAAGAGTGCCCGGAAATTGTGTTTATGAACATGATGAG
AATGGGGAATGGAGTGTTTGGGAGGTAGATGGGGATGTTGAGGGTACATTTTCACAGTCC
CTGTCCCTCTTCGCCAAACTCTTCCTGGACAATAAATCAGTTCTCTACGATGTGCAGTCG
TTCAATTATTTCCTTCTCGTCCACACCAATCCCAGTACGAAAGAACAACAAATCGTAGGA
TTCTTCTCGAAGGAAAAGATGTCATGGGATAACAATAATCTAGCTTGCATTCTTGTTTTT
CCTCCATGGCAAAAGAAAGGACTGGGGAGTATCTTAATAGGCACAAGTTACGAAATCAGT
AGGAGAGAAGGGCTACTTGGAGGACCAGAAAAACCAATTAGTGAGTTGGGGAAGAAAGGT
TATGGAAGATTCTGGGGGGCAGAGGTAGCGAGATGGTTGTTAGAATGTGAGGTTGGTGTG
GATACTTTGATGGGAGAGGAGGAGGTGGAGGAGGAGGAAGAGGAGCTTGATGTCGAGGTG
ATTAAAGTGGAAAAGAAACCACCGGCGAAGAAGCCATCGGGGAAGGGAATGGGAAAGGGT
TGGAGGAAGGGTATGAAGGGTGTAGGCATGCAACCTCAATCTCTTTCTCAATCTTCCTCT
CAGCCGAAGGAAATCCCAGCACCAGCACCCAAATTAACACCAAAAGCAACAAAATCAGCG
CCAAAGTTGCCCGTAACACCACCTATGGAAGATACCTGCGGAGCAACTACTGTAGAAGCT
ATTAGTAAAGGCACATGGATAGCGGTAGACGATGTTCTTGGGGTTCTTAGATCAATGGGC
GTACTTGAAAAAGTCGGTAGCTCAAACAGAGAGAAATCGGGAAAGAAATATAAAGTCAAA
GTAGATAAAGAACAAATCCGCAAGTGGATAGAGAAAGAGGGATTGAGTTTGGAGAAGTGT
GTAAGGGAAGAGGGGTTTGTGGAGGGGTATGGATATGCGGTTAGCGATGCCAGTGGAGTT
AGTGGGGAGGAGAGCTTGATGGAAAGTATTGAGGGGAGTGGGGAAGAGGTTGATGAGGCA
GGAGATGAGGATGAGTTGGCATGA
>e5f41261-d146-4c94-924f-555abb29805d (mRNA) 312 residues [BFAB_07:173534-174164 + strand] [cds] name=Bfab07g00460.1
ATGTCTCGAGAATATCATGATGATGTAATTCCAAATTCCAGGCCGAAAATGACTGCAGAG
GAGAAAACAGCAGTGAAGGATGCAGAGGGGCCAAACATTGAGAGGTCAGCTGGAGTGGCG
AGAAATAAGGTAGATGGAAACAATGGGGAGAAGTCCGAAAAGAGGAGGAAGACAATTGCG
GAAATGGATGAAGAGTTAAGGGCGAAGATGGAAGGAAGAGAGGGTGCAGCTGGGGTTTCG
TATGAAGGAGGAAAGCCGGTGACCGATGGATTTGGTAGGGGAGTGAAGAGTAACATGTTC
AGGGTCATTTGA
>efda60f1-25f2-4745-9ed5-a603d9f39bf1 (mRNA) 222 residues [BFAB_07:181801-183078 + strand] [cds] name=Bfab07g00470.1
ATGGTTCAAACACCCACCCAACGCAAAGCCAATCTCAAGTTCGCTGCCGTCAATGAGAAC
AAGCAAGGAAAATCAGAAGCTCAATTGCACAAGAAGGAGTTGAAGAAACAGAAGAGCCCT
ATTAGTAAGGGTTGGCTATACCTTTTCGCATTCATCCTCATTGGCGGATTATTTGTCGAT
CTCCTTTTCCGCGTAGTCTCCTATTTCAGCGGCGGTAAATAA
>50131f00-7c1d-4715-b7ab-4dcd688c8d02 (mRNA) 3036 residues [BFAB_07:185869-189571 - strand] [cds] name=Bfab07g00490.1
ATGTTCGAAAAGTCCTTGTATGACCTCATTCGAGGTCTGCGAAACCACAAAGGCAACGAG
AAGGAATACATTCAAAATAGCTTGAAAGAATGTCGTGCGGAAATCAAAGGGTCCGACATG
GACCTCAAGGCTACTGCCTTGCTGAAACTGGTTTACCTGGAAATGTTTGGACATGATATG
TCATGGGCTTCCTTTCATGTTCTCGAAGTCATGTCCTCGCCAAAATACCTGCAGAAGCGA
GTCGGATATTTGGGCGCTGTGCAGAGCTTCCGACCGGATACTGAAGTTCTAATGCTGGCT
ACAAATCTCTTGAAGAAGGATTTGAGTTCCGCGACACCGATGACAATGTCTCTACCAATC
ATAACGTTACCGCATGTCATTACTCCTTCACTTGCACTATCGGTTCTCTCAGACTTATTA
CCTCGAATGACACATTCCCATCCAACGATTCGCAAGAAGACCATTGTTACACTTTATAGA
CTGGCTTTAGTCTACCCAGAAACATTACGTCCGGCATGGCCAAAAATAAAAGAGCGATTA
ATGGATGAGGGCGAAGATCCAAGTGTTACAGCTGCAATTGTCAATGTGGTTTGCGAATTG
GGATGGCGGAGACCTCAAGACTTTTTACCACTCGCTCCGAGGTTATTCGAGCTCCTTGTT
GATAGTGGAAATAATTGGATGGCCATCAAACTCATTAAATTGTTCGCTACCTTGACTCCC
CTTGAGCCAAGATTGGTCAAAAAACTTTTACCACCACTTACATCTATCATACGAACCACT
CCAGCAATGTCACTGCTATATGAATGCATAAATGGCATTATATTAGGCGGAATTCTAGGA
AGCAGTGAGGAATCCGCAGGCGGGGAAGAAATAGCATCTCTTTGTGTGAGCAAGTTGCGT
GGCATGATTATGGTTGAAGGAGATCCTAATCTAAAATATGTCGCTCTACTCGCTTTCAAC
AAGATTGTTGTTACTCACTCATTTCTTGTCGCCCAACAAGAAGATGTAATAATGGACTGT
ATCGATAGCCCTGATATCTCAATTCGCTTACGCGCATTAGACTTAGTTGTAGGTATGGTC
AGCAGCGACAATCTGATGTCGATTGTTGGGAGATTGATGAGACAACTTCGGAGTTCCCCC
TCAGTGCCTGCAAATAGTTCAAATCCTCGACCAGCTGGGCACATTGAGCCCGAAGCAGAT
TCAGACGATGAGGCCCCGGAAGTTGCGATCAAGTCTGATAGAGGGTCATCACAAGATCTG
TTATTGCCTGATGACTACAAGGTGGATGTCATCACCAGAATACTCCAAATGTGCTCGATA
AACAATTATGCTAATCTCGTCGATTTTGACTGGTATATCGACATTTTAATTCAACTCGTC
AGAAACGCTCCTATCACAAATGCGACCTCAAACCAAGAAATGGATGAATCCTCAGATGAC
GATATTTCTGAAAAAATCGGAGATGAATTGCGAAATGTCGCCGTCAAGGTAAAAGCAGTC
CGATCTCAAGCGGCCAGAGCCGCCGACTCAATACTGATACTAGCTTTTAACGATACTTCG
AGTCAAGTTAGCTCCGGAAATGGAGCGCTTCGTCCGATATCATGGATGATTGGAGAGTAT
GCTTCTTATCTGGAGTCCCCAGAAAATACAATGGCAGCCTTACTGCATATTGCCAAGGTT
TCGACGTCTGCTGAGAGTCTCATTGTATACCTCCAAGCACTGCCAAAGGTTTTTGCGATC
ATAGCTGATGACGAGCGTTCATTATGGACAGTTGAACGAAAGACAATGATGTCACTTTTA
ATGGCACGTATTATAAATGCCATTGAACCCCTAGCAATGCACCCCGATTTGGAGGTACAG
GAGAGGGCGGTTGAGTTCTCAGAGCTGTTAAAGCTAGCAGCGGAAGCAACAAATGGTCAA
GAGCCGTCCTCGGACTCGGTTCAGCAAGATGCACCGCTTCTACTTACACAAGCACTCCCT
TCTCTATTCAGGGGCCAAGAATTAAACTCTGTTGCAGCGAGTGCGCAGAAAAATGTTCCC
TTGCCATCTAATTTGGACCTTGATCAGCCAATCAATCCAAATTTGCACAACCTATTGCGC
AATGTAGACACGATATCCTTTGATGAGCCCGAAAACGACGAATTCGAAGTCTATTATCAT
CAGAAACCAGAGCCTACTTCAATGTCATCAAATGGGCCTGCTATTAATCGTCTTGGCGGA
AGTCCCGACCAACCTGCTCAGTCCTATCAACAAGGCAGCGAAGAGTCATACCTAGATCCA
GATATTGTTGCGCGACGGAAAGCGGAAAGACTTGAAAGAAACAAAGACGACCCCTTTTAT
ATCGCACTAAATGATGGCAGTATCTCTGGTACTTCGACGCCTCTTCATAACATTATTCAA
AGCAACAATGGGCCAGATTTAGACATCGATGCCATACCAATTATGCAGCTAGACCTAGGA
AAGACGAATCTAAACACAACAAACACTAAAAAGCCCTCAAAAAAGCCTCGTCAACGAATA
CAAGTGGCTGCCGATGAGACTTTGAACATGAGTGGAACTTCTACGCCTGCAAACGATTCT
GAGAACAGTACTGATGGACCCATGAAGGCGCGAATGGCAAAAGGGAAACAATCCCTTTTG
CAAGTAGACTCGAGCCATATCGGCCAATTTTCCCTTGAGGGTGACAATACTAGCGGGATT
GATTTCGAAAGGCAGCAGAAAGAGGATGCTGAGATGGTAAAGGCCATGAAAGAAGTAGAA
AGACTTCGATTGGAGATGCAGCGGGCGAATGAGAGAATCCACGCTGCACAAGATGTTCCA
CCAGAAGGAACGGTGGTGAAAAAGAAGACGAAGAAGAAGGCCAAACCACTAGAAGGCGAA
GAAGTAGCGACAGTGATTAAGAAAAAGAAAAAGGCCAAGAAAGCTGTGGTTGACGAAGGA
GAAGGCGAGATCTCCATGGCTCCAACGACTACAGATGCTGTGAAGCCAAAGAAGAAAAAG
AAGAAACCAAAGGTGGAAGAAGAGATCATGGAATAG
>eb99d4ed-cef9-4eec-b01c-084ad9b7433f (mRNA) 972 residues [BFAB_07:189730-191461 + strand] [cds] name=Bfab07g00500.1
ATGTCCTCTGCACTCCTACACCCACCTGCACATCTCCCGCCAGCACTGGCCTTACAAAAC
TCTCAACAAGCTCCCTCTATATTGCGGAACACTCCCTCATCGATATCATCGTGGTCCTTA
AGCTCGCTTTGGACAGCTGCGGAATCACCAGAATTATGGACCACTTACGAAAATCTGTTA
ATGTCATGCTTGCGGACTGGTGATGAGAAATCTGCGCAGCTATGCATCAAGCGACTCCAA
GAAAGGTTCGGGGTTGAAAATGAGCGGATTATGGCAATGAGAGGATTACTTTGTGAAGTT
AATGCAGAGGACAATGCAGCACTACAAAAAGTACTGGACGGATACGAACAAAACTTGTCA
GACAATCCAAATAACATGCCTATCTTGAAACGTCGAATTTCGGTTCTTAGGTCACTTGGA
AAACCCTCAGAGGCAATTGCCGCACTCAATGAGCTGTTGGATTTATCCCCCACGGATGCA
GAATCCTGGGCAGAGTTGGCGGATCTTTATGCTTCGCAGGGCATGTATCCACAGGCAATT
TTCGCATTGGAAGAGGTCCTACTCATCACACCTAATGCATGGAATATGCATGCCCGACTT
GGAGAAATTCTATACATTGCCGCGGGTGTCAATGATTCGAATTCGGATCGGTACCTTGCA
GACTCTATGCGAAGATTCTGTAGAAGTATCGAATTATGTGATGACTATCTACGCGGATAC
TATGGCTTGAAACTGGCTAGTAGTCAACTTCTCCGCAAGCCCCCAACAAGTCGAAACAGC
AAACCAGATAATAGTCTACCCTTTCCAGGCACAAACACAATCGAGAAGCTGAATGAGACT
GCTACGTCTAAGTTATCGGAGATCGTCCGACGAAGTGCTGCTAGAGAACCCGGCTGGGAG
GGTTATGACGAAGCTTCCCTCATCGCCGCTCGTGAATTGTTGAATAGAGATTCGGGTTCT
ATTACTCGTTGA
>b9111140-f9df-45d2-8877-dd8d4ce307ff (mRNA) 2763 residues [BFAB_07:193718-198689 + strand] [cds] name=Bfab07g00510.1
ATGCCTCTTCGTACAAGGGGTCAAACAACTCGAATAAGCATTTCACATACTCCTAATACC
CAAAGTCCATATACTACTCCATCACACTCTACTTCAAATTCTAGATCCAATTCATTCTCC
GAGGGATCGTCGGGTCACATTCGCTCAGACGACAGTCAGGAATTTTCTGATAATTCCCAA
GACTCTTGGAACGGATTAGATTATTCAGACGACATCGAACCCTCTGAATCTGCTTCACGG
CCACGCGCACAGGCAAGATACATAGACAGAGGGCAAATTAGTTCCCGAGAACATAGTGCA
GGTCGACCAGCTCCTAGTGAACGTGCGCACTCGAATTACGATCGTCCAGCACGCCGTCAT
ACTCCGGCCGCTGAACGAAACCACCGCCCACCTATATCTAGAGTGCACCGGCACACAGCA
CCGGGACCAGTATCAACCGTGGAGCAATTAGATGATTTTTCAGGCTATGGCCGAGGCTAT
CCTGCTCAACAAACCGCTCCGTATGGTGGTAGAGTAGCGCCTGCGCCTGGATATGCCTCA
AATGGATACCCCGCTAGTGCAAGTGCTCAATATGCACCCCCGTTTGGCAATCCCGCTGTC
GCTCCCCCTCCAGGCTCTGGCCCAGGAGCTTTAACACATTATGGTGGCGGATATCCTCAA
CAACAATACAACCAAAGTTCAAATCCATTTGCACCACAAAGCCAGACTTCATTTGCGCCA
CAACCATCTCCAAGCCCAGGCGGAGCTAGCTATTTCAACAGCCATAGTAGACACGATCCA
ATGGCATCTAGACACGATCCAATGACGTCTAGACACGATCCAATGCCGTCTAGGCATGAT
CCAATGGCATCCAGACATGATCCAATGGCATCTAGACATGATCCAATGGCATCTAGACAT
GATCCAATGACTGGGCACAGTGGACACAACACCCCTTCTGGATATCCTGGCCATGCTAAT
CAAGAGCTTATGCATTATGCACCTCAGCAAGGTTACCCCGGGAATCAGCCATATGGCGGA
GGTCAAGGCTATCCAGGGTACCCAGCATATATGCCACCTGCTATGTCTCCGGGAATGACT
CCAGGTATGTCTCCAGGTATGTCTCCCGGTATGCAAACACTGCAGCATGGACATCATGGA
CAGCAGCATGGACAGCAGCATGGGCAGCATGGGCAGCAAAATATGGCAATGGCTCCAGCA
GGGATGCAATACTTCCCTCCTCAATTTTCCCCGCCAGCTCCTGAGCCAGCTCCAGCTTCC
CCACCAGTGCCAGTAATTGATATTGAGATGGAGAAGAAAATGGTGTTGATGGAGGAGCAA
ATGAAAAACGCTAAGATAGAGTCTGATAGGGCTAAAGAGCAAGCAGAGGCCGCCCAAAAA
GCATCTGAAGCTGCACAGAAAGCATTGGCCGACAAAGAGGCACGAGAACTCAAAGAGAAA
TTAGAAGCCGAAGAAGCTGCTGCTGCTGCACAAAAGCTAGCAGATGAGAGGGCAGAATGG
GCAAGGAAAGCCAATGAAGCCCAAGCTGCAATTGAGAAGAGAGCAGCCGAGAAACAAGCT
GAACTAGAAAAAAGGGCTGCAGATATGGAGGCCGATTTAAAAAAGAAGGCCGCTGAAGCT
GAAGCTGATTTGAAGAAACGAATGGAAGAAGCTCAAACGTTACTAGCGGCTAAACTTGCA
CAGGAAGCAAAAGCAGAGAAAGAGGCAGCTGATGCCGCTGCACAAGCTGCTTTGAGGGCT
GAATGGGAGAAGAAGGCATCAGAAGCACAAGCAGATTTAATGAAGAAAGCTGCAACAATG
GAAGCAGATCTCAAAAAGATGGCTGCCGATAATGAAGCTGATTTGAAAAAGAAAATGGAA
GAGGCACAATCAGCATTGGCGACCAAATTAGCGAAAGAAGCTAAGGATGCCGCGGACGCT
GCAGAGGCCGCTCAGGCCGCAGCTATTAAAGCTGAATGGGAGGCTAAAATCGAAGCTGAG
AAACAATTGGCATTGGCGAAGGGCGCCGCGGATGCATTGAAAGCCAGGGAAGATGAAGCA
AAAGCTAGGGCAGCCGAAGAGGAAGAAGCAAAGAAAAAAGCAGATGAGTTAGCCGCCGCC
ATCGCCGCCGCGACCGCGGCTGCGACTGCAGCTGCAAATGCTGCTAATCCACCGCCACCA
CCTGCTCCACCAGTGGATGAGAAAAAGAAGCCTATCAAGTTCAAGGATGCCGTAGGCAGA
AAGTTCAGCTTTCCATTCCAGTTGTGTGCAACATGGGCGGGCATGGAAGAGTTGATCAAA
CAAGCTTTCCTTCACGTCGATATTATTGGTCCCCACGTTCAAGAAGGTCACTATGATTTG
ATCGGACCCAATGGTGAGATTATTCTACCCCAAATATGGGAAACAGTGATCGAACCCGAT
TGGGCGATCACTATGCATATGTGGCCAATCCCAGAACCGCCAAGGCCAGCACCTCCAACT
GGACCTCCTGGACCACCCCCAATGAATCCAAATGCACCTCCCAATGGCATCCGACCTCCT
GGGCCTCCCCCTGGTGTAGCTATGCCACCTGGACCTGGACCTAGACCACCGCCACCGCCA
CCCGGGCCTGGGTCTGGAGGCCCTCCTCCTCCTCCCTTTCCTCCCTTTATGTCTCACCCA
AGCGGCCCACCAGGTCCAAGAATCGTAACGGTCAAACCAAAAAAGAAGGTAGAATCCGGA
GTGCTGGGATGGATGGCAGGCAAGAGACCTGCGCCTTCATCTAAAAGTCGATCCAAAAAA
TAA
>633151e7-b921-42b7-bbaf-a9a5a36c6a72 (mRNA) 7626 residues [BFAB_07:204312-212416 + strand] [cds] name=Bfab07g00530.1
ATGCCTTCTTCAGAGAGAGAATCTTCTCGCGATGGCGATAGACTTGCTCTTGTACATAGA
AATTCCGCGCATTCCATATCCTCATCAATAGATTCTGGGCGAGCAATTGTTCCAATGTGG
GATAGTTCTGATCCAGAACGCGCACCTCCTCCACTTCCCATGAACCCCTCGTCCCCGAGT
GTCTCATCGCGAGGAACTTCGGCTGCTATCAAGTCTGCACATGCGGCGCTTACTGAAAGA
GCTCGCGACAATACTTATTTTATCAATATACCACCCCCAAAACGCCTCACCGAACCATCC
CCAGAACGTTTACTGATTAAGGGTGCTGCTCCCGGTCATAAACGAATGCAATCTTTGCAA
AATGGTAGTGTCAGAGATTTGAGTAGTTTTATTGAAAGTGGAACTTTCGGTCCATTGAAA
CCTCCAGAGAAAATATCAGCAAGACCTGCGACACCACACGCCAGCAAGGATTTCTCATTC
GACCCATCGCCAGAGAAGTTTTCCGACAAGATGTCAGATAAAGATTCGGCTCGAGCCACA
ACACCTACCAAAAGAGCCGAGTCGCCTCAGGAAAGACGCGACTCTATACATGTACGACCT
TCACTGCGCCGGCCACCCCATGGTATGTTTAGCGAAAACACGCCCCCTCAGTCAGCCACG
ATGCAGGCTCTTCACAACATGACGAGTAAGGAGACAGATCCACCTCTTGCCAATGTCACC
AATGGCTCTACTGCCTTAGTGCGACAACCTCAAACGTTCGACGCCATCTCAAATCAAATT
CTCAGTCTCACCAGTATATGCACCAGCCTGCAGAGGGAAATGGTGCAATTGAGTAGAAGA
AGTAAGGATAACGCTACAGATCTAGTCAGTCTCAAGGAAGCGACAAATGCCAGGGATGAG
GATATACGTAAGAGTCTCCGAGAACTGGTTACTGGCTTGTCTGATGCTGGCTCCGAGCGT
ACACTATATGGAGGCAATAATCTTTACGCGGACAACAAGGGACATGCTTCACCATCCTCA
TCACGCAATTCAAAAGGATTCTCGCTTCCTCGAATCCCTAGCCCAAACAGCTTCGCTGCT
TCATTGGATCGAGAAACCTTATTATCCACCCCGCTTACGAGAGATCATGGTCGAGAACAC
ATTAGCGACGCTGCTGCGCATGCTGCTAGTGTGGCTCTGCTCGAAAAGGTACTGCGAGAG
ATGGGAACTAAAGAAGGACAAGAGTTGTTGATATCTCGACTTACGGAAATCGCTGAGCAA
CTTGGTCGGGAAGGAATGTCGACAGCCAAAAAACTAGAGGACCTGGTAGAATTTATCAAG
AAAAATACTGAAATTTCTCAATCTCTAATTGCCCATCACAACAACAATCGCGAACAAGAG
ACCAGGGGACGTAAATATAGCTTTGAAGAGGACTCGCCAAGACTAGAACTAGATTTTGAT
AGGCCGGCCTCTGTCGCACAGAAATTAGAGGCTCTTGTCGCCACTGGAGCAAATAGAGAC
CGACACAAATCGCAAGGGCGCAGTCGATCAGGTGAAGTATTAGGTGATGATGTCATCCAA
GTTATACGAAGTGTCAAAGATAGCGTCGCACAAGGAGGTGGCCTTACCGCAGAAGTCAAG
GCACTAGTTCGAGAACTTCGTGGTGAGGTTTTGGGTATGGGACGAGAGATCGGCAGAAAA
TTAGATCAAGCCAGCAAGGATGGAGCTTCCAATGGTGCCGATGTCACTATTGTCGTTCAA
AATGGGTTGGAGGAGTTGAAAGAGCATATGAATCAACTTATCCGTGAAAGTCGACGTCAA
AACTCCGCTTCCGCTGCCACACAAAAGATTGACTACAAAGAAGTCTATAACGTGGTACGC
TCAGCGGTAACTGAAAAGTCCGAATCAAGAGAAGACATTATTGATGCGGTTCGAGAAGCT
TGGGAAAACTATAAACCGGATATCGAGTTGCAGCATTTTGGTCTCGAGAGAGAGGAACTA
TTGGCATGCTTGAAGGAGGGCATTCAAGAATTTGCGCCTCAGAACGAACCGGGAGCAACA
CGAGAGGAAGTCTTTGCCGCAGTCATTGAAGGATTGAAGCATTTCACTCCACCGCCAGTG
GATAACGAATCATTATCTCGAGACGAAATTCTCGATGCTGTTCGTGAGTGCCTTGAGGAG
TTTGAGTTTCCAGCTGCACCAATGCCAGAGCCTCGCGAACCTGAAATCACTAGAGACGAT
ATGCTTGATGCTGTGGCGGAAGGTCTTAGAACTTTCGACTTTTCTGCAAACCCCACGGCA
CTCAGTGCAGAGGTTCTTCAAGGGTTCACTCAAACTGAAATGATTCAAGCCGTTAAAGAG
GGTCTCAAAGAATTTGATTTTGCTGCTATCAACCGTGGTCATGATGACATCAAAAGAGAC
GATATGGTGGTCGCTATTCGAGAAGGGCTCCAAACATTTGGACTTGCTAACCAGAATCGC
GAAATGGATGGAGGTGTTACTCGAGATGACGTGGTAGGCGCAGTTACCGAAAGCCTACAT
ACGTTTGACTTCTCCGGCAGTATTCATTCACCACATCATGGCGAAGAATCCATCACTCGT
AACGACATGTTTGAAGCTGTGAGAGCAGGTCTTGAAAGCTTCGAATTTCCCACTTTGAAC
AGGGAAGTCGGAGATAGTATTAGTAGGGAAGACGTTTTCGATGCCGTGAAAGAGAGTCTC
CACAATTTCAACTTTGGCGCATTAATACCAGCCTCCGACCCCGAGGAAAAAGAAACAGGA
ATTTCTCGGGAGGATGTTTTCGAGGCTGTCAAAGATGGCCTGCAAACCTTTGATTCCGCT
CTCACACGCGAGGTTGGTGGAAACACCGGCATTAATCGCGGCGATATCCTTGACGCTGTG
AAAGAGGGACTTCATACTTTCGGTTCTGCTCTTACTAGGGAAATCGGTGGAAGCGGCAGT
CTTACACGTAATGATGTAATGGATGCTGTCAAAGATGTTTTGACCACTTTTGATTCAGCC
CTTATTCGAGGAAGAGCCGAAAGCGGAGCAACTCGCGAAGAAATCGTCGATGCCATGCAG
GAAGTTATGACAAAATTCCATGGCTCATCCATAGCTTCAGGTCCAAGTCAAGGAATTACT
CGCGATGATGTCGTCGATGCTTTACAGGAGGTTCTGGAAGGGTTCAACTCGGCTCTTACC
AAAAATGTTGGAGGTTCTGCAACTCGTGCTGAAATTTTCGAGGCTATCAAAGTCGGTCTC
GAATCACATGAATCTAGTGGTAATATAACTCGGAATGACGTCCATGAAGTTATCAAAGAG
AATCTTCAGAATTACCATATTGAAAGTGCCCTTACCCGCGACGAAGTTGTGGAGGCCGTC
CAAGAAGTATTGACGGCGTTCGATTCTGCATTAACCAAAGATGCTTCTTCAACAGTTACA
CGAGATGATGTTCTTGGGGCCGTGAAAGAAGGACTTCAAGCGCAGACATCTAGTATCACG
CGCGATGAAGTTCTTCAAGCCATAAAGGACGGCCTTCAATCGAAAGAAATTGCATCAACT
CGGGAGGATGTCGATTCAATCACTCGAGATGATGTATTCGATGCTGTGAAGAGTGGATTT
GAGATCCATGAAATTGGAGGAAGTGTCACCCGGGATGACATTCTCGAAGCAGTCAAAAGT
GCTAGTTTCACACGTGAAGACATACTTGATGCCGTGAAAGATGGACTCCAAACCTTTGAT
TCGGCATTGACAAGAGGTGTCACACCTACATGCACTAAAGCTGATGTTTTCGAGGCTGTA
CGAGTTGGTTTACAATCTCAAAGATTCCCACCAACAGTCACACGTGAAGATGTATTCGAA
GCCGTCTCAGATGGCCTTCAAACATTCAACTCCGCCATCGTTAGCGTTAGAGAGGCAAAT
GCTAGCAAAGGCGACGTCTTCGACGCTGTCAAGGAAGGTTTCGAAACATACAACAACGCT
CTTACTCTTGATATTCCAGTGGGCGTTAGTCGTGAGGATGTTCTAGATGCAGTGAAGGAG
GGACTACAAACGTTTAACTCAGCGCTCACTACCGAAAATGATGTCAAGGTTGACCGAGAG
GATATTCTTGAAGCAGTCAAAGAGGGCCTCGAAAACTTTGATTTTGCTGCTGCTAAGGCG
TCTACCGATCTAAGTCGAGAAGTTGTGGAAAATATCACCCGTGCCGATGTTATTGAAGCC
GTGAAAGCAGGACTAGAAAGCTCACCACAATCTGTTGACAACTTCACTGCTCAAGTCTCG
GAACGCATACATGAAATTATGGACTCTGTACGAATCGAATTCAAGGCAGTTTCAGACGAA
GCTAAACAACAGGTTGCTGCAAATGGACGGGATTCCGAGCAACTACTAGATGCAACTAAA
GACGGATTTGAGAAGCTCCGATCTGACATTGAAGCTTACGTTGATCGAGCCTCAGATGTC
ACAGGTAAAGATGAGATTCTCGAGAACATGCAGGATAACTTCGCTACGCTTCGTTCCGAA
GTGGAAGAACTTATCTCTAAAAGCTCAACTACTGGTCTTGAAAAAGTCCACAGTGAACTT
GAGCATCTTCGAGGTTCAATAGCATCAGCTTTGGTTCCATCAGGAGCAAGCAATGATAAA
GATGAGATTCTTGATGCCTTGAAGGAAGGATTCGATGGTCTCAAACCTGGTATGGAAGTC
TCGCGGTCACGAGATATTGACGAAGAAAACATGCCAGGAACCAGAGAAATCATCGACGCT
CTGCAAGACGGGTTCTCTGTTCTCAAAGCTGAGGTTGAAAAGGCTGCCAACAAGCCTATC
GATATGACTGTTAATCATGAAATTCTCGACACCCTCAAGAAAGGTCTAGAGAATGTCAAA
GTTGATTTTGAAATTCTCAAAGAGAATCAAAAGAAAGAGCAAGCACTGGTAGAAGTCTCT
GATCGCGCATTGGTTCCAGCTAAGGACAGCCTCTCTCATAATGATATTGGGAATCTAGAG
ATGCTTATTACCCAGCTTGGCATCAAAGTAGCAGCACTGGAGTCGAAGGAACAGCTTCCA
CCACAACTTGCTCCTGGTTCTGTGACCAAAGAAGATTTGGCTAAAGTCGAGGAGCTGCTT
CGAAGTGTTCAAGATAAAGTGGAGGGGGTTGTTACGCGCGAGGTTATCCCTGATGAAGAT
AGAGTCAAGAAGGAAGACCTTAATGCCATTGAGATTCTGCTTCACAATGCAAAAGCTAAG
CTTGATGAGATCGACCCTGAACAATCTGCTAAGAAGGAGGACATTGAGACTATGGGTGTC
TTTGTTCTTGAAATCCGAGATAGTGTCAATGCAATGATTGAACATCTTGAGGAAGTCTTG
AAGAAAGATGATATCACTTCTATCGAAACTGCAGTACATGATGTCATGAATGCCCTCGCA
GAAATAAAGGAGCAAGTCAGTAACGAATTCAAGAGTCTCGACAAGGTTACAAAGACCGAC
GTTGAAGCTGTCGAATCTGTATGTCTTGACATCAAATCTGCTATCGAGCAAACCGTTGTT
CCAGAATTTGCAGTTTTAGCTACGAAAGACGAAGTTACCACACTAGGTACCTTGGTGAAG
GAAACCGCCGGTCGAATTGAATTACATGCAACGACGAATGCCAAAGCTTTCGAGGACCGA
CAGGCGGAAACTGTTGGTGTTAGTGAACGTGTTACAGAGGTCAAATCTTTCCTCATGGAA
TTCAGGGATGCAGTCAAGGAGAAGCTCGACGAAGGTACAGCTAATGTCGAGACAGTTCGC
ACATTCCTTGAAGGTCTTGGAGAAACTATCAACAAAAATGGCACTATGTCCGAAGATCTA
CAAGCAATGTTTCATGCTATGACAGAAGAGTTTGAAAAGACTAATGCTGGTATGGTTGGA
TCTAAGCTCGATACTGATGAAAAGTTTCAACAAACATGGGACAAGCTCGATTCACATTTT
GATGAAAAGTTTACTGAAATCATTACCAAATATGATGAGCTCCAGAACTTCTTGGAAGAA
AGAGCCACAGCCGGTGTAGAAAAAACAACAGAAGTTGAGGCTAACATCATAAGCACGAAG
CAAGTGGCTGAAGATGTCAAGGGCCTACTTGATACATTAATAAGTGCTGTGACAGACTCC
GCCGAAAAGATGGATGAAGGCTCAAAGACCGTTTTCAACCGTGTTGATGAAACATTTATC
AGAGTAGAGGAAACTCACGCCGATGCTAAGGTCGAGCACCAGCTCACACGCGAACAAGTA
TTGAAGACTTTGGGCGTTGTGGAAGGAGTTCATGGAACTGTAACGGAGTACAATCCCCAA
ATTCTTGACATGATCAAAGATGTTCTTAAAATGGTTGGTCAGCATTACGAACATTCAAAG
AATTCGGTAGAGACAATTCAGGAGAAGATCGCCGAAATTCCTCCTCCACCAGAAATCCCT
CCTCCTGTTGAATACGATGATACACCTGTTCACGAGAAGCTTGATAAGCTTGTGGACCAT
GTGCAAGAAGCCGGAAAGTCCGTGGCACAATTGGAAATGCTTGACAAGATCCATCGACAA
ATGATGTCCACTGCTGCAGAAGTTTCTCAATTTGTCACAACTCAGACCCAAAAAATTGCA
GATGACCATGAAAGTAAGGAACAAGCTGCCGCAGAAGCTGCCATTGCCTTGGAGAGACGT
CTTGTTCAGAAAGAACAAGTCGAAGCATCGATTGCTTCACTTAAAGGCGAAGAAAGAGCT
ATGAAGGAATATATTACCAAGCTTAAGACCGACAAAGAAGATTTGCTTCATCAAAAAATG
AGACTCTCTTCTGATGTTTCTAGCTTGGAAACAGCCTTAAGAATCCGCCGTGAAGAATTA
CAAGAAATGGAAGAAAGAGCTGAAGGACTTGAGAGACGCATTCTTGAGGGAGTCATTGAT
CATTCCCGAGCCCTTTTGTTAGCAAATGGCAATAGAAAGAAAGCACGAGATCCTATGAGT
CGTAAACGGAACCCCACTCAACGCAACTCAACGGCTCATTCTATCGCCTCCAGCGTCGCT
TCCAAAGCTCCATCGATTACACAGGGCGCTGTTAATATGGCAATGAAAAACCGCTCTCCT
ACCAAAGGACCTCAAGCCAATCAGGCCCAAAGACGCATTCTATCCCTGAGTCAAATCAAC
AATAATCTTTCAAGTGGCAACTTCAAACGTAGTCACAGTGTCAAACAGCCCAGTGCTGCT
GCTACTCCACGTAAAACTAGCTGGGGAGAAGACTCAAACAAATCCCGCAATTACGGAGAA
CTTAACAAGGAGAATCTGGCTTTGAAAGAATATGAAGATGAAGATGAAGAAAACAAAGAA
CCAGGCCATCTTTCTGATCATGAAGGCGGAAATCAAAGCGATTCAAACACAATGAGAAGA
AGTAGTCATGGTACTACTGTTATTACGGGAAATGAAGGAACAGAGTATTCGGAGAGTATT
GATGGTGGTGGAAGAGATCGAGATGAGGATAGAGATAGGGATGAGGGGTCAGAATCGGAT
TATGAAACGGAAACGGACTTGGGAACCAATAGTCATTTGGGCACCGAAAGTGAATTGTCG
AGTAGTAGTTTGGGAAAGGGAAAAGACTATAATGCGGTGGTTTTGTATGAAGAGGAAGTT
GTTTAG
>69514aa8-49fc-4265-a41b-83ecc8f42461 (mRNA) 1521 residues [BFAB_07:212644-214544 - strand] [cds] name=Bfab07g00540.1
ATGTCAACGATAAAACGTTTTACATGTTTACGATGTCAATTCCAGTCCCTCTCACGTCCA
TCTCCTCGTCGTCCATACCATGTCTCTCCACGTTTACGTTCCGAAATACCCAAGCCCTCC
ATAGCACCCAAACAATCTATCGATATAAAACATATACGAACTAATCCCGAATTATACGAA
ACAAGTTGTCTAGAAAGAAATTACAAATTGCAGTCAACATACCCAGCTAAAATCATAAAT
CTATTCGAACAATGGCACGATTATCAGCGCGATGCAAGATCATTACGGGAAAGAAATAAT
AAATTAAAACTTCAACTTGCAAATCCAAAAGCAATACGAGATGACGGTTCAGAAGAAATG
CAAAAGTTACGCGCCCTTTCCAAAGAGGAGATCATCGCAGAAGCTAGAAGTCTGAAGGAT
AAAATCTCTGAAATAGAATCTTCAGAATCAATGCTCATGACAGAAATCAACACACTCGCA
TCCGCAATTCCAAACCTTACATCCGAGTCCACTCCCCGCGGCTCAGAACCAAAAGTAATA
GGAACCATCAACGAACATCCCGAACCCAAAGCCGCCTCCTCAGATCGAGTATGGCGGTCT
CACGTCCACATAGGTAGCGAATTAAACCTCCTTGATTTTTCCTCTGCAGCCAATACTTCC
GGTTGGGGATGGTATTATCTACTCAACGGTGCCGCACTCCTCGAACAAGCCCTAATCCAG
TATTCCCTCTCTCTCGCTCTCTCAAAAGGCTGGTCCATCGTTTCTCCCCCCTCAATGGTC
TATTCCCACATCGCATCAGCATGCGGTTTCCAACCCCGCGATCAATCAGACGAACAACAA
ATTTACTCCATCACCCAATCTCCTTCCGATGCCGAAAGCGCAAAACCAACATATTCCCTC
GCCGGAACCGCCGAAATTCCTCTCGCGGGAATGAAAGCAAACACCACTCTCCACGAATCC
CTCCTCCCTTTGAAAACAATCGCCACATCCCGCTGTTACCGCGCCGAAGCTGGCGCTCGT
GGCATCGACACCAAGGGACTCTATCGAGTGCACGAATTTACAAAAGTCGAAATGTTTGCC
TGGACCTCGCCTTCCCTCCCAGAAACCACAGAAATCTTCAACGAAATGCTTTCCCTGCAA
ACCGCCATCCTCACCTCCCTCGATCTCCACTGTCGAATCCTCGAAATGCCCTCTACCGAT
CTCGGCGCCTCAGCTATGCGCAAAATAGATATCGAAGCCTTCTTTCCCTCGCGCAGAGAA
AGAGATAATGGATGGGGCGAAGTAACATCATTAAGTATCTGCGGGGATTATCAAAGTAGG
AGATTGGCGACGAGAGTGGATATTGATAAGAATGGAGGGAAAATTGCATTTCCGTGGACT
GTTAATGGAACAGCGCTTGCGGTGCCTAGGATTGTGGCTGCCATTTTAGAAAATGGATGG
GACGAGGAGAGGAAAGAGGTTAGGGTGCCCGAAGTTTTGTGGCCGTGGATGGCGGGGAGG
AAAGTTTTGAAGAGGGAGTAA
>0259fd24-9371-4237-b7fa-a69c552d568e (mRNA) 1425 residues [BFAB_07:215424-217639 + strand] [cds] name=Bfab07g00550.1
ATGATTTCATCAAATCAATCAATCACAGAATCTACTGACGAGCCTGTTGCAAATTCAAAA
TTCCTGTTCATCGCGATCAACAATCCAGATGATTTGAGAGATCATGACACAAAGCGCCGA
GCCCGGTCTCATGCTGTGAAGCAAGCGCTCGAGAACAACCGAAAGCTTCAAAAAGAATCA
GGTGACAATTTCAGAGTTTCGTCGTCAAAAGATTACTCCAGAAGATTGGCGAGCAATAGA
ATACGTAGCCAACCCCGGGTCACAATACCATTGTCCCCATCCGTCAGCACGCTTGATCCT
TTCCAGACGCTGGCTGTGGATTCATCGAGACTGCATGCACTGTTTAGCAACTACAAAGCC
AGACAGGCTGCCGAGCCTGTTTTCAGTGTTAAGAATGAGCTTGTATATCATAGCTTTCAC
ACAGTTTTCAACGCAGGGCTAGATGACCCTGCTCTTTTGAATGCTGTTATGCTTACATTC
GCATTTGCGGCGACGGAGGGGGGCATCAATCAAGAATGCCTTAGGTACCAGAGTAAAGCA
ATAAGTTGCATTCGTAAAAGAATGAGTTCTATAGACAGGGCTAATATGACAACAACCATT
GGGGCCATATTGCTGCTTACTGGGGTGGAGGCTCGCCTTGGGATGCAGTTTCAAGTTCAA
ATTCATATGAGAGCAATAAAACAGGTGCTTGATATGTGTCAAACGGAGGGGATATATCTC
ACTAGCGGAATCAAGCGGGCTATATTTTGGCAAGACTTGAATTCATCTTTTATGACAGGC
TCGACGCGCATAGTTGATCATACGACTTTTAATGAGCTTCAGTGGAAAAGAGATTCGTAT
TCCCCAAGTCTTTTCCGGCTTCCGCCAGGATTCCAGGTCCGACCCCAAGTACTAACCAAA
GAGTTTGTTGAAATACTGGAAGATATACATGCATTGTCATGTATTCGTGTGTTTTCCGGC
CCCTCCAACTGTAAACCGCTAGCGATGGCAAATATTAACAACCACCAAGCATCTATTCAG
TCACGGCTGGTGGGATTATTGGGCCATTCTCCCATTTTAGAGTGTTGTAAGCTTGCTGCA
TATCTTTGTTCCAGTATGCTATGCTGCCAGGTTTGGTGTGCCTTAGTAATTCCGACCCAC
GTTTCCTCAAGATTACTTCGAGAACTACAACAAGCGAACGACGACCCTGTATGGGAAGAT
CACCCTGAGTTGTTACTTTGGCTCCTGTATATCGGCGGGGCTTTCACCACCACGGAAACC
GTACGCTCAGATTACGTTGTTCTCCTGCGCTTGAACACTTCTTCCAGACTTCGAGGCTTG
TATAAATCGTGGCAGGAACTGCTTAAAATTTTGAAGCAATTCATTTGGTCGGACGTCGCA
TTCACGTCGGATGTTAAGGCGCTCTGGGAAGAAGTCACAAATTAA
>a04d1ddb-3c55-43d0-bdb7-209b22ff8b65 (mRNA) 1113 residues [BFAB_07:217810-219592 + strand] [cds] name=Bfab07g00560.1
ATGGCTCAATCGCGCCTTTTCCAGCCTTTGACAATTGGCAATATGGAAGTGAAGCATCGC
ATCGGGATGCCTTCACTCACTCGCTTCCGCGCTACCGACGATCGTGTGCCAACCACTATG
ATGAAGGAATACTACAGCCAACGCGCCTCTGTTCCTGGTACCTTGATGATTGCAGAGGGT
ATCTTTGTGTCGCCATCAGCCGCCGGCGGATATCCCAACGCGCCAGGGATATGGAGCAAA
GACCAAATTGCTGCATGGAAAGAGATCACAGATGAAGTTCATGCGAAGGGTTGCTTTATC
TTCTGTCAGTTATTCGCAATGGGCCGTACTGCCAATGTAGAGGTGGCGGAGAGTGAGGGA
ATCAGCATCGTGGCGCCAAGCGCTATTCCGATCGATGAAAACTTCCCAACACCGCGGGCT
ATGACTATCCAAGAGATCGAACAATTTGTTGGAGATTTTGGGACCGCCTCAGAAAATGCT
ATCAGCGCGGGTTTTGACGGTGTCGAGTGCCATGGCGCGAACGGCTACCTCATCGATCAA
TTCATTCAGGATACAAGTAATCAGCGCAACGATGCGTATGGCGGGAGTGTGGAAAATAGG
TCTCGCTTTATCAACGAAATCATGAAAGCCATGGTCAACGCTGTTGGCCCGGAACGTGTT
GGACTCCGTCTTAGCCCTTGGAGTCCGTTCCAGGGTATGAGAATGACTGATCCCATTCCA
CAATTTATGGACATCATCTGCAAAGCCAGAAAATTAAACCTCGCATACCTACACCTAGTT
GAGTCGCGAATCTCTGGTGCGGATGACTACAGCGGCAGCAACGAGCGGCTAGATTTTGCA
TATCAACTTTGGAACGGACCTATCCTTGTCGCGGGAGGGTACAAACCAGCGGATGCACAA
AGGCTTGTTGACGAAAAACGTCCAGACAAGGATATCGTGGTCATGTTCGGAAGGTATTTC
ATTTCAAACCCAGATTTGGTATATAGGGTCAAGAAGGGCGTGGCATTGAATGCGTACGAC
CGGAAGACGTTCTATATTAAAAATTCGTCGATGGGGTACGTGGATTATCCGCCAAGCATA
GAGTATCTGAAAGAGCACGAGAGTGTCTATTAG
>dff58684-85ef-465d-a159-90f77e4d2d7c (mRNA) 2991 residues [BFAB_07:223866-227254 - strand] [cds] name=Bfab07g00590.1
ATGGCTTCTAAAAAATACGCGCTTCTTCCTATGGAGGAAGAGGAAATAGGTCCAGCAAAA
GTGGTAGCAAAGAGGAAGGAGAAAAAGTCACACCGTGAAAGCTCCTCGCGGCGCGACAAA
CACCGAGAAAGGTCACCTCGTCGAGAAAGGTCTCCACGTAGAGATACAGAGCAGCGCTCA
AAAACTATCCGGAATAAGGCAAATGATGATTATGAGGAACGATGGGGCGACGAAGAATAC
ATTTCCGAGGACGAACCCGAATTCCAGGAGCCTGCCTCAAAACGGGTCAAAACAGTACAT
TCAGATGACAATATCTCGGATTCAGAAAAAGAACGAAGGAAAGATCAAGCAGAGAAGGAT
GCTTTTGCGCAGAGGCTGCTGTCGAAGAATTCCGACAAATCAAAGACAATACTCGAAGAT
AGATCCGATCCTATTATGGCACAGAGGAGAGCATTGGCCGACGATGCTGCTGCAAGACGT
GCTGCAATGCCAGATCTAAGGGAAAGGTCGAGACAAGAATACCTGAAGAAGCGTGAAGCG
GAGCGTCTCGCTTTGCTGAGGAGACAGGTCGAGGATGAAACGAGGGAGCTGAATGATCCT
TATTCCAATTTATCAAAGAAGGAGAAGGCAGATTTCGCCAAGAATAGAGAGCTGCTTCGA
CTCGCTGATGAGAGATCAAGAATTGATGATCACCGTGATGGCTATGCTATGCCAGACGAC
TATATTACAGAGAAAGGGAAGCTCGATCAAAAGAAGAAACAAGATGCACTATACAAACGC
TACGTCGAAAGGGATGAATATGGCCAGGAGAAATTCGTTTCTGAACACGAGGAGTGGGAT
AGGCAACAAGAAAAGCTCGCCAGAAACCAGATCCAAAGCACAGAACGAGTCGATCAAGGC
GAATATGATTATATCTTGGACGAGGAGCAAGGAATTAAGTGGATTATGGATTCGAAGTTA
CCGGGTCAAGGCATGGATAAAGAAGCAAGATTCTTAGGTGAACAACTGAAGGCTGCTGAG
CAGAAGGCAAAGACAATTGAGGAGACGAGGAAAAATCTTCCAATCTATGCTTACAAAGAC
GAATTTCTGGCTGCCCTTGATCAGTTTCAGACTATTATCCTTGTTGGTGAGACAGGATCT
GGCAAAACTACACAATTGCCCCAGTATCTACATGAAGCTGGGTATACTAAAGATGGGATG
AAAATTGGAGTAACGCAACCTAGGAGAGTGGCTGCCATGTCCGTTGCTCAACGTGTGTCA
GAGGAAATGGGATGCAAGATCGGAAACGAAGTTGGTTACGCTATCCGTTTTGAGGATTGT
ACAAGTGACAAAACTCTCATCAAATATATGACGGATGGTCATCTTTTGAAAGAGGTCATG
ATTACACCTTCTCTGGACGAGTATCAGGTGATTATGATTGATGAAGCCCACGAACGGACT
GTGCATACCGATATACTTCTAGCTTTGCTCAAAGATCTTGCCAAAGAAAGGCCAACAATT
AAACTCCTGATTGCTTCAGCGACAATTAATGCACAGGCTTTCTCAGACTTCTTCGATGGC
GCTCCTATCTTCAATGTTAAAGGGCGTAGTTACCCAGTCGAAATTTATAATACCCCACAG
CCAGAAGCAAATTATCTTGCTGCAGCCATTACTACACTTTTTCAGATACATACCTCTCAG
CCAAGTGGCGATGTGCTGATATTTCTAACAGGTCAAGATGAGATTGAGGCAGCGGAAGAA
CGAATAAGTGATATTTCAAAAAAATTAGGTTCGAGAGTACCCGAGCTTGTTATTTGTCCT
ATTTACGCAAATCTTCCAACCGACCTACAAACCAAAATTTTCGAACCAACACCTAAAGGA
GCACGAAAAGTTGTGTTGGCAACCAATATTGCAGAGACGAGTTTGACCATTGATGGCATT
GTGTATGTCATCGATCCAGGATTTGTAAAGGAGAATATCTATAATCCAGCGACTGGAATG
TCAAAGTTGGTTACAGTAGCATGTTCACGAGCGTCTGCGAATCAAAGAAGTGGTCGTGCT
GGTCGTGTAGGACCTGGGAAGTGCTTCCGCTTGTACACCAAATGGGCGTTTATGAATGAA
ATGGAAGAAAGTACCACTCCTGAAATCCAGCGAACAAATCTGAATGGTACAGTTCTACTA
CTTAAGTCACTTGGAATTAACGATCTCTTGACTTTTGACTTTATGGACCCTCCACCGACA
GAAACTTTAATTGGTGCTCTCAACCAATTGTACGCGTTATCTGCATTGAACAACCGTGGG
GAACTAACCAAAATTGGAAGACAAATGGCCGAATTCCCAACAGATCCTCAAGTTGCGAAG
TCTATCATTGCTTCAGACCAACTGGCATGCTCTGACGAAGTATTGAGCATCATGGCAATG
TTAGGTGAAAGTTCGGCACTATTTTTCCGTCCCAAAGGAGAACAGAGAGTGCATGCAGAT
AGCGCCAGAGCGCGCTTCACGATCAAAGAAGGAGGGGATCACCTCACCTATCTGAACATT
TGGAATCAGTGGGTGGACAATGATTTCAGCACTATCTGGGCTAAAGAAAACTTTCTTCAA
CAACGTTCCCTTACTCGAGCTAGGGATGTTCGAGACCAACTTGCAAAGCTCTGTGAACGG
GTGGAAGTTACAATTGCCAGTTGTGGGGCGTCAAATCTGGAGCCCATTCAAAAAGCGATT
ACGGCGGGATTCTTCGCTAATGCGGCACGATTACAACGAGATGGAGATAGCTATCGGACA
GTGAAGAGAAATACTACAGTGTATATACATCCTTCGTCAGTATTGATGGCAAATGATCCC
CCTATCAAGTTGGTTGTGTATCATGAACTTGTACAAACTACAAAGGAGTACATGCGCAGT
TGCATTCCCATCAAAGCAAATTGGTTGTATGAGCTTGCACCCCATTATCACAAGAAGAAA
GAGATAGAGGAGATGGGAGAAAAGAAGCTGGCAAATCGGAGCAGGACATGA
>3b4041cd-572a-4ca4-bcb5-4581f838201a (mRNA) 321 residues [BFAB_07:227339-228230 + strand] [cds] name=Bfab07g00600.1
ATGAACCGCACTTCGATGAGTCTCTTAAGGGGCTCAAAATACCTGGCAAGGAGCGGCGCA
TCCATATCACAACGACGATTTGCATCCTCAGAAACTCCTTCACCTACTCGCGCATTCTAC
AAAACTTTCACTCGCCCTATCGCAAAAACTCTCCTGATAGCAACTTTCATATATCAATTG
ACCTATTGGGGTTGGGTGAAATTGGAGAAGGATGAATTAAAAGCAGGCAAACGTAGGGAA
ATAAAGGAACTCGAGGAGGAATTGGAGAAAATCAGTGGAGGCGCTATTAAGGGCGAAGAT
GTGAAAGTCAAAGGTATCTAA
>fbad3779-2b43-40a4-baf2-7a15a4010cb9 (mRNA) 4314 residues [BFAB_07:229067-233987 - strand] [cds] name=Bfab07g00610.1
ATGGATTCAAAATCTCGAATTGCGCAAGAAAAGCTTGCTGGGCTGGAGAAAGCATCGGCA
CCGTTCGAGGAACAAATCCGTGAAGCTGGAAAATTTGTTGATATTGATTTGGATAAGGTC
GCTACTGTTCTGGATCATCAAAAACATGAAGAGAAAGTCTTCAAGAAGAAATGTGCGGCA
GGTTCGTTTCATGGTAGAGAAGAATGGCTTCTACGATGGCTTTTGAAGAAATTGCAGTCT
CCTAAGGATAAAACTGCCAGAATTACACCGTCATCATGGCACCTATTCCGTTTATTATTG
AATGCGATCCCGCTAGCGAATACTGCACGCATGCTCACCGAAAAGAAGTTTATCGTAACC
CTACAACAGACATTACAGGAAGCCCAAGAGATCAACGACATTGACGATTCTGGCATGGAG
GCACAAAATGATTCAAAATCGGGGTCTGACTCAGGGGAAACATCAATCATCTCGAAAAAG
CGCAAACGGACCGGGGAACTAGTCACCCACACGTATCATGGTCCAGCCAACGGGCTTCGA
GCTTTAGTTATGGCGATTCATACTGCTATCAATAGTATCGTTCGATCGACCAAAGTTTCT
TTCTCCCAAAGAACGGCAGGGAATGGTCGAAGTCCAGCCTTTACCACGGAGTATATGCGA
GCCGTCGTACGAACCACGCCCGAATCGTCCGCCATGGTTCTAGGTTCCTGGGTGTCTCTT
TGCCAGATGGTTTTGAGTAAAAAGGCTGGTGTGGTTATATCGCCCCAATTGATGTCCCCC
TTTATCGACATCTGGGACTACCGCGTGGCAGGAACCGAAGATCTGATGCAATTTTCTCTT
CACTGCTCAGAACCTTTACTAGCATTGTTCAAAATGACGAAGGTAGATTCAGCCACACAG
GATTGGAAGGAAATCTTGGAAAAATTGATTGCTCGAAATATCATCATTCCTTCAAAAGCG
AGCGCCGGAGAGAAACAAGATTCTACGTTGTTGCAGAGTTTGACGAGAGTCCTAGTTCTG
CAAGATGTTGCAAACGCTCCTATTCTTTTTGATATTGCGATCCGGTCTTTGCAGTCGAAT
GGAGACCGCCGAAGACGACCATCAGATAATGCCTGGCTTCAGACAGTATTCACAACCTTG
AAAGCTGCCATGCCCCCAACTAAAACAGCGGCGCATAATTCTGCCATCCGCGAAATACTT
CAGCGCTCCATTCAACACGAAGTGGATCTTGGCCTCCCAGAACTTAAAAGTTTAACAGCG
GAGTATGTTGTACCTGAGGGAAGCACGGATTGGTACCTTCTAGAAACCGTGATGAAACTC
GATGCAAATGTTTTCCTCGTCGCTGATAACGACAAGAATTTATTGAACGATGTATTGGAG
CGAATTACTAACGTATACTTCGAATCTGCCTGGCCCGAGCAATCTCGACATATTGTATCC
GGGATTGTCGTTCCTTTAATGAATGAATTTGCCAAAGCTCGTGATCTGTCGGGATTTGTG
CGCCACTGGTACTCTCAGCTTGTTAAGTTTGAGCAAACACGAAAGGAAGACGCGATGTTC
CCGGCAGAAGCCTTTTGTGCTTGGGAGGATGAAGCATTGCAGATCGAGCTTCCTAAGGTT
TTGGAGAATTCCTTAACTGTTCAACAGATAGTACAGTTAGTTGATTGGCTAGCTATGGAG
ATGGTAAACCAACCTAACGCTGTCGTAACCATCCTTGAAGCTATTGCAAATTCAATTTCT
AAAGAAGATGTTGTAGACATCATTGGAACACGTTTGTACCATGTCATCTTTGATAACGGA
AATTTTGGCAAGTTGAGTGACAGATATAGCTGGCGGGCTTGGAGGGTTCTGACTCGATCC
TTCCAATGGATGCAACCTCTTCATCTAGAAGAAATTGCTGGGCTGTGGGAGCAGCAAGCG
AGCCCCTTTACTATATTGTCTACCCATACGTTTGGTGAGAAAGAATTGGATAATTTGGAA
ATCTTTCGATGTGCATGCTCAGCATGGAATGCGGCTGAAATTGGAACGAAATTGGAAAAT
CTTTCATCGCCAGTGGTTTTGCGCTGCCTTGAACAATTAGGCCCTTCTATTGGTGCCTTG
ATTGATCAAAAAATGGCAAATATCGAAAAGTGGCCCATCCATCTCAACACATTATCACGA
GGCGCTCAATGGACTGCATGGTCATTTTATAATTGCATCTTTCAGGAATATCCTCGTGCC
CTAGAACTTGGCATAAAGTTACAAGACAGTGCCTTTGAGTTGCTGTTAAAGAATATCCTC
TGGATAGCTTCTTTGGCTAAGACCTCTACAACTGAGCATGTATTGAATCATGGAGCATTC
GCCGCTTTATGGTTTGGAGTACTGCGTCAAGATTGTGTACTCAACCACTCGAGCATCATC
AGTCGATTCATCGATGTTCTGCTGAACTGTCAGACTCAAGAAGAAAATCCTCTTACTGCT
ACTTTTACATGTAATTATGCTGTCATTGAATCTCTAACACAACTTCCATTGGAGGTGATC
GGCAAGAAGTACAGAGAGCGGATTATGCAAAGTTGGTCAACAGATCTCTTGGCACAATCC
CCTGAGTGTTATCCCGCTGTGCTAGCATTGAAATTGAAGATCATGCATCGCCCTACATTT
TATACAGGCATGAAATACAAGGATTTCGAAGAAATTGAGAAATTGATCAAGAAAGTCGGG
TTCGAGGAGATGCCCAAGCGATTGGAGACTCTTTTTACATTGAGAGAGCTTGTTAAGTTG
ACTTTGTCACATGTGACTAGTAACTTGGATCAGTATCAAAATCGAAATTATGTCTTAGAT
GCCATAAGTTATCTCCAAGATAAACTCTCTAAATTTACCAGCGACGAGAAGAAGACCAAG
GGCGAGAAGGCTTTGCCTTTCATCTCCACATCACACTCATTACTTACTGTTCTTATTACC
AAATCGAAGCAACTTGATGATCTAGCTATTGTCAGCAACCAAGATTTGACTGACCTTTGC
ACATCCTTCAGAAAATTTCTTCTCGTCCAATTGCAAAGGCGACTGAAAAAGAAGCCTAAG
ATAGATGAGGTTGGTAATCATAAGGATGGTTCATTATCGGTCGTTGTTGTTCTCCAGGCT
CTGGAATCTCTGGACGTGGATTCATCAGAGCTTGAGCCTCTCGCAACAGAAGGTCAAGTA
TATGCTGCGAAGCTGAATGAAGGAAAGCCAGAAGTGGATGGTGTACGTCAACTATTGCCG
GAATTCTTTGCTACTCGTGCGTCGAGCAACGAAAATGGAATCCTCCACATCTCTTTGGAG
GCTTTTATTAACACATCTGCCGGTAGAGCTGGCATCAAGAAAAAGATGGACACAATTACC
TCCGGAATGGACAATGCGGAAAAGTTACAGCTGGTTCAACATTTAATGGGCGAAGAACTG
ATCGGCTTGAATCAACTGGATAAGTTGGTAGCTATCAGATGTGTTATTGGCGCCTGCGAT
AATATTGGACATGAGCCTGCTGATGCAAAGAATTCCCAAAGATCAATGGATCTCTGTCAA
GCTTACGATCTGTTTTGCACACAGATTATCAAGACCAATTCATACCGGGTATTTTCTCTG
CTAGGGGAAATTATGGAGATGATGTTAAAGACAAAACGTCGTGCCCTCTCCCAATGGTCC
GTTGATCGCACTCTGGCAATACTTGCTATAATATGCTCCAGCAAAGGACCTTCTCTTCCT
ACTTCACAAGCGAATAACATCTTCATTCGTCTGTGTGCGTTAATGAAGGTCGTCCTTACC
AACCACCGCTTCCGTCTTGAGGGTCATCTTCATTGTGTCATCCAAGTTCTACAGCCTCTT
CTCCGCTGCTTCTTTACAGCCCATTCGCACACCTCTAAGAGGCTTCTTCAGGCCTTTACC
CCGCCCCCTTGGCTCCCGCAACTTCAACCAGGCATAACTTCATCTTCCTCGAATACCCTT
TCTCCCATAGCCGCCGAATCTTTTACCCGTCTTCTCACCCTCATTTGCGACCCTACACCT
AATTCCATTTCTCATTCATCCATGAACAATCTCACGTCTGCTGTCGCCAAAGCCAAAAAG
ATCGCCGGTCAACATATGCACATCATACTTCAGACATACATAAAATTCAACCTCGAAATG
ACAATGAAGTCAGAAGTTAGAACTGCTATGACACCTGGCCTGTATGCAATATTCGGGTGC
ACAGATATGGAAGGACGTAAGGCTGTGGTTGATGGGCTGGATTCCAGTGCTAGGGCAGTT
TGGGGAACTTTATATAGAGATTGGGCTCGATTCGGAAAATGGAAAGGTGCTTAA
>88939bcb-2067-4d9a-8918-8bfcb073f4bf (mRNA) 1101 residues [BFAB_07:234145-235646 + strand] [cds] name=Bfab07g00620.1
ATGTCTCAAGACGAAATTCTACCAAGTAATGAAGGTACTATTGCTGTCGAGGGTATCTCT
GCCTTGACTATCCAGGATCCTGAATCATCCGTGGCTAATGATCGTCCCGAACTTCCCCAT
CGTTCTCATGATCCCGAAAACAACATGAAGAGATCAGATCCATTTCAATTTGGTTCTCGA
TATCTCAGTGAAAAAGACAACGTCTTCGAGTTCAATGCATGGGATCACGTCGAGACTGAT
GATACTTACAAGGAGTATGCAGAACTACAATATGCGAAACAACGCGAAGCTCCTGTATCG
GAATTTGACAAAAGCAGATTCAATTCCGATCCCGCCAAATGGTGGAACAATTTCTACAAG
AACAATACTGCCAATTTCTTCAAAGATCGAAAATGGCTCCAGCAAGAATTCCCCATTCTT
TCTCAAGTGACAGAGCCAACCTATGGGCCTTGCACAATTTTGGAAGTTGGCGCAGGCGCA
GGTAACACTGCTTATCCAATATTAAAACATAATCAAAACCCTGAATTAAAAATCCATGCT
TGCGATTTCTCCAAGAAAGCAGTGGAAGTGATACGTGCGAACGAGGCATATGACACCAAG
AATATCCAAGCAGACGTGTGGGATGCCGCTGGCGATGACCTTCCCCCTGGATTGGAAGAG
GGTAGTGTCGATGTTGTGATCATGATCTTTATCTTCTCTGCACTTTCTCCTAGTCAATGG
AATCGAGCCGTACAAAATGTCTTCAAAATCCTCAAGCCAGGTGGCGATGTGCTATTTCGA
GATTACGGCCGTGGTGATCTTGCTCAAGTGCGTTTCAAAAAAGGCCGTTATCTAGAAGAA
AACTTCTACATTAGAGGTGATGGAACTCGGGTATATTTCTTTGAAAAGGACGAGTTGGTC
AACATTTGGACCGGAAAACTTCCCGAGTCAGATGCTCAGGCTACAGATTCAACGACAGAG
CAAGAGTGTGGCTTCGATATTATTGATCTAGGCGTTGACAGAAGGTTACTGGTTAATAGA
GCCAAAGAACTAAAGATGTATAGATGCTGGATGCAAGGCCGATTCAAGAAGAAGAGCTTG
CCTAGCACCAATCCAAAATAA
>799a3632-eef3-481b-b199-823782cee5f5 (mRNA) 1269 residues [BFAB_07:237040-238894 + strand] [cds] name=Bfab07g00630.1
ATGCCATCGAGGAGAAAACAGCTAAAGAGAAAACAACCTGTCGCGACTCGCAGCTTAGCC
AGACTAGCTAAGAAGCATCGAGCCAACACGCCAGAAGAAGATGTACAAGCACCGCAGCGA
GATATTGAGGAGCCAGAAGTCAAGGCAGAGCTCGAGTCAAATGATAAATCACCAGTTGCT
ACTAATCCCGGAATCGAGGCCGAAATGTTTGATGATGGCGCCGATGCAGATGATGAAGCT
GAAGAGTTCCAAGGAGAAGGCAACGACGAGGATGAACGACACGAACCTTCCGAGAGGGGA
CCAGAGGTAGGAAAGTCCGATGATGAAACGGATTATGAACAGTACATAGCGTACGGCTCC
GACGATCCTGAGTATCAGGAAATACGACGCAAACGTGAGAATGAAGTATCGCCGTTGCCC
AGGATACCGACAATTCCTCGATTGATTACAATACTTCGTGGTAATGGCAGGGATACCTCG
GATCAACGTCTCACAGCCAGTTCTGGGAAGAATAGACTCCCGAACTTTTTCGATAAATAT
GGAACCCGGCATCACATCCCTATCGAGATCTTCAAACAAATATTGGACTACCTGTATCAA
CAGAAAGATTTCATTACCTCTACTTCGGTATCCCTTACCAATGTTTATAATTACGGGCTT
GTCTTCGATATTTTCGGACTCAGTATATGTAGGAGAATCAAGGACTTACTACAAAACCAG
CCAGTGGAAGCATGGGAAACAGGCTTTTTTGACCTCCCAGTTCTCTTTGCACCACCCTCA
AGGCCCAGAGTTTGTCTTCGAAACGTCCTTCATTCGTGGTTTCCAGAAAGGCTCACGTGG
ATCCAGTATGGTAATAAATGTATGTATCATGGTCCGATCTCACTCAAGCTTATACGAAGA
TATATAAGAAGAACTGAGGGGGAAGGACAACGGAGAGCGATTAAGGAACATGAAACACGA
CTTAGAGAAGGCCGGGAGAATAAACTACAAAGGCAGAGAGACAGAAAAGAGCGCATCGAA
AATAGACGCAACAGAAGAATTGCCAGGTTGTCAGAAACACAAGAAGCACATGCCGAGGAC
TCAGAATTCTCAGATGATCACGATTGCGTTAAGAGCCAATGCGCTCTTAACCCCGAAACG
GCCCATAAGAAAATACAGTATGTCTCTTCAGGGCGTGATCCGATAACCGATTCCGAGGCA
ATGAATTCTTTTGCCGAAGACTCGGATGATATGGGATGGTCGACTGAGGACTCAATGCCA
GCATCATAG
>632b4180-8924-4401-a8b3-2b01ea25992a (mRNA) 1071 residues [BFAB_07:239213-241056 + strand] [cds] name=Bfab07g00640.1
ATGGCACGCCAATTCCGTGTACATGTACCAGCTGTTCATGTGCAGCCAACCTTCCATCTG
ATCGAAGCAGAGATCCTGGATCTTTCATATCAAGCACTGGTACTACAGGTTGATGGCACC
GTGAGGCTGGATAAAACGGCAATAAACCCTGCCGCCTGGAGAGCTCGTGCAGGTGCTGAA
TTAGTGGGCGGTCCAAATGGCATCCCCCCTGGTCGTATAAGAAATAAATTGGCAGCGCTA
CCAACCGGCCCTCAGTTAAGAAATAGCTGCACAATGTCTTTTTCTGGTCAATTAGGAACG
TTTGGAACCCCTGGAGCAATGCCGCTTATGGTACTAGCTGTTCGAGTGGATGATCCTAAT
GATGGCACACTTCAGCCCCCTCCACTCGGACTGGCAATTGGAAAGGCAAATCATGATTAC
TTTTTAAGGAAAGGAATTTCCCATATAATGTCCCGTGCAATGAATATTAGGAAAGGTATC
CCCAACGATTATGACCCCAACGATATGGAACAAGTAAATGAAAACAAATGGCGATCCGAA
CCGCCTGTATCTATTGCGTTCCCTCTGATAGGATGTAGAACAGGGTATGGGTTTATTAAT
GCAGCCGAAAATATTCTGAGCGCAATCATTGGGTGGTACAGAGATCCACAACACAACGGA
CAGTTTGGAAATGCTGCAATGCGCGCTCTCAGCATTCCAGATATATATCTCGTCGTTCCT
CCAAGAACACCTTTAAACGTACGTCGTCTCAAGCCTGCATTGATTCGATCTGCCTGGGAA
AAGGCATGGAACCGATATATGCCACCACCTCCGCCTGCTGCTGGTGCTCCACCCGTACAT
TTGTCTAGAGAGGCCAATGGAAACCAGTTTGATCAGAATCGACAACACACAATGCCAGGT
TGGACACCAAATCTTGGTAATGTTCTATTAGTTGATGGTGTGGATGATGTAGCAGGAGGG
TTTCCACTCAACCTTACCCCATGGGTACGAGAGAATATCACTGATGCCTGGGTCAGACGT
AATTGTAAAGTATTTAGAGGAGGTAGAATAAGGAGAGTGACTGTGATTTGA
>965318b3-5081-4d20-ac72-a3c62cc43117 (mRNA) 885 residues [BFAB_07:242008-243414 + strand] [cds] name=Bfab07g00650.1
ATGACTTACAGGAACTCCATTATCATCACTGGCGGGACCATCAACCTAGGCTACCAGACT
GCTCTCAAGATAGCAAGAGAACATCCAGACTACCTCGTCGTCATCGCATCCAGGTCCGAT
GAACAAAACTCCGCCCAATCCATCAACAAACTTCTACATCAAGACAATGCTATTTTCATG
CAACTCGATCTTTCCGATTCGAAAAGCGTTCGAAATTTTGCTACGAAATGGATCGCTGAT
TCCACGAAACCTCAAATTAAAGCTTTAGTTTTGAACGCCGGTCTTCAATTCCCAGCCGGT
CTCGTGATCACACCCGAGGGATTGGAAGCAACTTTTGTGTGGGACATGCACTTCTTTTCT
TCCTCTTATGTCCACATCTCGCGCCTGATTCCCGCGTGGTTTTCACATCGAGCGGCACAC
ACGATCCTACGCAAAAGACTGCCCGAATACAATACCGCAGAGGATCTCGCCCACCCTCCA
GAATCCATGATTGAGATTCCAGGACGCAAGCAACGGGCCCCCGAGCGCCATATCACTGTT
ACAGCAATGGATCCTGGTCTTATACCCGGCACTGGATTGGCAAGAGAAGCAAACAAGTTC
GAACAATGGCTTTGGAATTCTGTTCTGCCACACATGATTTGGTTGCTTCGTTTACTTGCA
ACACCAAACACGCATACACCAGCAGAGTCAGGTACTGCACTTGCTAGACTTGCGACTGCT
GCTGATGTCGAGGGCACGACGGGGAAGTACTTTGAAGGACTAAGCGAGATCAAGTCGAGC
AAGGATAGTTATGACGAGGGTAAACAAGAAGACTTATGGAATTGGACAGTCAGCTATTTG
GCAAAGGACCCACTCGAGAAAGCGAAATTCGAGTCGCTCAGATGA
>7a5f8835-b7b6-4013-9e2e-8cc22bae8984 (mRNA) 1611 residues [BFAB_07:243711-246034 + strand] [cds] name=Bfab07g00660.1
ATGAGAGACTATTCGAATAACGCATCGAGTCCTAAATATGGCGGTACGGATCAAGTTAGC
GAGACCCCCAAGACGGGAGTTGGAACACAAAGCAATTTCAGTCAAGAAGAAGGAGAATCC
GCTTATCAAACTAATGATGCGCGCCGTCAAATTGGCCCCATTTCCGCCATTTTCTTGATC
TTCAATCGCATGATCGGAACCGGAATCTTCTCGACCCCAAGTACCATTGTTGCACTTTCC
GGATCTGTTGGGCTGGCACTATTTATCTGGGTTGCAGGTATGCTGATTGCAGCAGCTGGT
CTTGCAACATATATGGAATTTGGTACCGGACTTCCACGAAACGGTGGCGAAAAGAACTAT
CTCGAATATGTATTCCGAAAGCCTAAGTTTCTCGTCACTAGTATGTATGCTATGTATGTA
GTACTACTCGGTTGGGCGGGTTCGAATTCCGTGGTATTTGGGGAGTATATTTTGAGTGCC
GCCGAAGTTGAGGTAACTCGTTGGAATCAACGTGGAGTAGGATTGGCCTGTATCACAGCC
GCTTTCTTGATCCATGGGTTTTCTATAAAATGGGGATTGAGACTTCAAAATCTTTTGGGT
GTTATCAAGCTTCTAATTCTTCTCCTGATCATCATCTCGGGCTTTGTTGCGCTTGGTGGC
CATCTCAGAATCGAGAAGCCAAACAATTTTACAAATGCTTTTGAGGGAACGACTGGTAGC
GCCTACGGAGTTGTCACAGCTCTGTACAACGTCATCTGGAGTTATATCGGCTATAGCAAT
GCCAATTATGCGCTTTCCGAAACCAAAAATCCGGTCAGAACACTCAAGATGGCCGCGCCT
ACAGCTCTCGCTATAGTCGGCGTGCTTTATATGCTTGCAAACATTGCATATTTTGCCGCT
GTACCAAAGGAGGAAATCATGACTTCGGGTCGTATTTTGGCTGCTTCATTTTTCAGAAAC
ATGTTCGGATCCCGTGCCGAGCGTGTATTGTCTGTTTTCGTTGCCCTTTCAGCATTTGGG
AATGTCCTGAGTGTCATATTCTCCCAAGGCAGAATTGTACAAGAAATTGGTCGAGAAGGA
ATCTTGCCATTCTCCCGACTTTGGGCAAGTAACAAGCCTTTTAACACACCATTCATGGGC
CTTTTCGAACATTGGCTGGTGTCTGTGATCATTATGTTAGCTCCTCCACCTGGAGATGCT
TACAACTTTATTCTGAATGTTATCTCATACCCACTTGCGGTAGTAAACGTCTTTGTATCT
CTAGCTTTGCTTATCCTTTATGCTCGACCATTCGCAGCTGATCGCCATCCACAACATTGG
GCCCCGCCTTTCCGTGCTACTTGGCCTGTGGTTTTATTCTTCCTTCTCTCGAATGTCTAC
CTTGTCGTTGCACCATTTGTTCCACCCGATGAGGGACAAAATGTATACGAGAGTTTGCCA
TATTACCTTCATTGTGTTGTGGGTATTGCATTCTTCGGCGCGGGAGCTATTTACTGGTTG
ATTTGGGCCCAAATACTACCCAGAATTGGTGGATATAAACTCGTTCGAGAGAATATCGTT
ACTGATGATGGATGGAGTGGAAGTGTCTTCAGAAGGGTCAAATCAGAATAG
>b8f0de41-773d-47a2-9361-0d4bcf18bb9b (mRNA) 1299 residues [BFAB_07:246131-248294 + strand] [cds] name=Bfab07g00670.1
ATGGCACCACTACTCGAAGATCCTCGTATCCGACAGACCTGGAATCAATTCTCACAGAAC
GCGGAACATGCAACAGAAAATGCTGCGGCAGGAATATGGACTTTTCAACATAATTATTTA
AATCCTTGCTTTTCGACCATTGGGAACGGCTTCAATTCGTGTACCGCACAATGTTTCCCA
GGACAAGAAGAAAGGGCGAGGAGATTAAGAGAACGAGGGCGGACGAGAGGACGCGCAGAG
TTTAGTTTCGATTTCTATGACGATTGGGATGAAGATGAAGGCATTTTAGGAGGGTGGGGA
AATGATGAGTTGGATAGATTATTGGCAGGAAGTGGATCGCATTCTGGAAATGTGAATGAA
GCACCAAAGAGAAAGAGAGGGATGAGTTACGGAACAAGAGGAAGAAAGAAAGGATTAGAA
GGCGACCCTACAATTATACCGAGTACAAGCGCTATAGGATTTCTAGGACGTTTACCTTGG
AAGTTAGGGGGAACGCTAAGATACAAACCTAGCGCTGCAGATTTGCAAGAACATCCTGGG
GCGCATCGATCGGATTTTAATGGAGTTGGAGAGGAAGCAGATGCATTAATGGGAGATGAT
CTTGATGATGATGTGCGGGATTTCATGAGAGGACATACGAGAAATAGGAGTTCGACGCAG
AGTTCAGGGGAAACTTCAGATTCATTTCGATCGAGAGGGGATTTATTCCCCAGTGATGAA
GAAGATGCCGTGCCTTTGAGTGACGAGTTTGCAATGGTACTTGAAAGGCGAAACACAAAT
TCTGGTACGGACGATAAGAGTAGTGGGAAAACGCGAAGTAGTAAAGGCAAAAGACCTGCG
CAGTCAAGGGATGTTTCACGAACCACACAATCATCACAAACCCTACGACCAAAAGGAGTC
CGTTCGGGTTCAGGGACGTCATTACAGAGTAACCCAGATCTATCAGAACATGACTTGATC
AATACCTTGTCAATTGAGGATTTGCAATTAGAGGAGGAAAGGATACGTTTAGAAGAGGAT
GAAGAAGTGGAAAGAAAACGACAAGCTGCGTTACGACTGGCGCAGGAACGAGGGCTTCAT
GCAGAGGGTAACTCGGAACCTATTTTGTCAGAGCCAAAACAAGATATAGAGGAAGTAGAC
GAGCCAAGCCCACCTGAAGTAGTCGACGTAGTACAAGCCACCGAACTACCTCCAGCTCAA
GCAAAAGCACAAGATGATAAAAATACAACAGAGATAAAGGATACTGACAACGACAAAGGA
AATCATTTTGTACCTGCGAGACTACCGAATTTTGGTTGA
>be62dc66-e0c1-40db-a66a-597041ab2799 (mRNA) 1071 residues [BFAB_07:248682-250139 - strand] [cds] name=Bfab07g00680.1
ATGGCGACTCAAGGTCCAATAACCACTCCCCTAACCACCCTACTTGGTATCAAGCATCCT
ATAATCCTCGCCGGTATGGCTCGTACATCCGGTGGTCCACTGGCAGCTGCAGTCAGTAAT
GCAGGTGGACTGGGCTGTATAGGAGGATTAGGATACACACCTCAACAACTCCGCGAAATC
ATCCACTCCCTCAAATCCAATCTGTCAGACCCCTCTCTCCCCTTTGGCGTTGATCTCGCT
CTCCCTAAAGTCGGCGAAGGCGCTCGCGCTACAAACCACGATTATACGCATGGCCAACTC
GATGCGCTTATCGATGTGACAATCGAAGAAGGCGCACGACTTTTCATATCCGCTGTGGGA
ATCCCGCCTCCACACGTCATTAAACGATTGCACGATGCGGGGATTCTAGTGATGAATATG
GTTGGGGCTCCTAAACATACGGTTAAAGCTTTGGATGCGGGGGTCGATATTGTGTGTGCG
CAAGGAGGAGAGGGCGGAGGACACACGGGGGATATACCAAATTCTATTTTGATACCGGCG
GTGGTGGATGTGGCGAGGAAATATAAACCTGCGATGTTGAAGGGAGAGACGGCGTTGGTT
GTGGCGGCGGGGGGGATTTATAATGGGAGGGGATTGGCGAGTAGTTTGATGCAGGGCGCG
TGTGGGGTGTGGGTGGGAACGAGATTCGTGGCGAGTGATGAGGCGGGGTGTAGTAGGATT
CATAAGGAAGAGGTTGTCAGTGCGAGATTCGAGGATACATTGAGGACGTTGGTCGTGTCG
GGGAGACCATTGAGAGTGAAGATGAATGATTACATACAATCCTGGGAATCGCAGCCAGCC
AAAATCCAAGAGTTAACTCGCAAAGGCATCACGCCCCTCGAATACGATATGGAGCAGGGG
AAAGATGTCGATATTCCGCATTTGATGGGGGTGGTGGCGGGCGTGATTGAAGATATTAAA
CCTGCGCGGGTGATTGTGGATGAGATGGTTGCGGAAGCGGTGGATATGTTGGGGAAGGCG
GATGGGTTTTTGAGTGCGCGGGCGGGGAAGGCGGGGTGGAGTAAATTGTGA
>d34bca41-8ade-40aa-b356-d43af3a5f48f (mRNA) 546 residues [BFAB_07:250355-251540 - strand] [cds] name=Bfab07g00690.1
ATGTCCACTTTCCCAACGATCTACGAGGGGGTACAGAGTGGGACGAGAGAGGAGACGAAA
GAGGAGACTTTGAGATCTGGAGAAGAAAGATTAGAAAGAAGACAATCTCACGATCGGGTT
GAAATGGCATCCAGATCATCCTGCGAATCAGAGGTACCCGGAGAACATTCAGACTCTGCC
TTGCCACCTCCATACGTGAGATCTCGACTCGCAGGCTACCTCGAAGCTGAACTTCGCTCT
TTTCCTGGCGGAGACGAAATCACCACCGCAAGCGTCCCTCAATGGACTTGGCCTCGATCG
GCATGTCGTCTTTGGATTTATCTCATGGTTCTGGAGAAATGCGAACGTGGTGCCATCATC
GCCTACGAAACGGCATGCAGGTTCAACGGATTTGGCCCGGCGTTGTACATCATGTTCAAG
AGCGAGTGGCGTAGCTTGCTTCATGAAAGTCCGGAGGATAGTATGACGATTTACTATCAT
TTGCTGGCGTTGAGGAATGAAAAGGGTGCGGTACCGCCGGCGTTTGAGATTTCACATTCA
TGTTGA
>c0fa65ee-402e-436f-a69e-ac33469d3014 (mRNA) 1224 residues [BFAB_07:252663-254653 - strand] [cds] name=Bfab07g00700.1
ATGTCCCCAATCCCCATAACGATTCTTACCGGCTTCCTCGGCTCAGGGAAAACAACTCTA
ATCCTCAACCTTCTCCCACAACTGCACGCCCTCAACCCCTCCTACCGTCTCGCTCTTCTC
AAAAATGAGTTCGGAGATCTCGCTGTCGATTCCCAGCTTGCTTCTTCATCCTCCATAACT
TCCGTGCGGGAAATGCTCAACGGGTGTATATGTTGCAATCTCGTCGGTTCTCTATCTTCG
GCGCTTCAAGAATTGCAGGAGAGTTTCCCAGTCAAAGTCAACGGATCAACCGGGGAGGAA
GAGAAGGGAAGTTTGGATAGAATTATAATTGAAACATCTGGGTCGGCATTCCCTGCTACG
TTGGCTATGGAGGTTAATAGGATTGCGAGGGAAACAAAGGGGGCTTATGTATTGGATGGT
GTGATTTCGGTGATTGATGTCGAGAATTGGAAGGGATATGAAGATACGAGTTATACGGCG
AGATTACAGGCCAAATATACGGATTTGGTGGTTTTCAATAAGTGGGAGGGGGTCAGTGAG
AGAAGGTTCGATGAATGCTTGGATAGATTAGGGGATTTGGAAGTTCAGGTCGCTTGGGTC
AAGAGTGATAAGGGGTCAGTGGGGGTAGATGTTGTATGTGGAGTTGACGGAGGACTGGCT
AGAGGGTTGGTCGATGATGTTGACGGAAAGGAGAATGGTCACAGCCATGACCATACAAAT
GGCGATCATAAACACGAACATTCCCACGACCATCAATCCGAAGTCGAAGTCCTATCCATA
ACCCTCACATCATCTTCTCCATCCTCAACAATATCTCTCGATCCCCTCAACAAACTCCTC
ACAAAAGCACCCAAAGATGAAGTATACCGCATCAAGGCAGTTTTATCCTCAAGCTCTCCC
ATTCCACCTTCTGATTCTTCACTGTCGCCGCCCGAATCTGACATCTCTGCATCCTCATCC
TCATCGAACTCTACTTCTGATCTCACACCAAAACCTGCCAAGTATATTCTCAACTGGGCG
TTTGGTCGTTGGACAAGCACAAAAATGGAAGTACAGCAATTGGAAAAGGAACACGAGAGT
AGCCAAGGAGAAGGCGTAGTATTGAGAATGACGATTGTGACGGCGAGAGATGAGAGCAAT
AAGTGGAAAAAGAGGATTGAAGGAGGTGGTTGGGTGGAGATTGATGGGGGAGAGGGAGAA
TTGAAGGTGGTGAGAATTTTGTGA
>448333f1-d1bc-48ea-807a-3ec18520fcda (mRNA) 1917 residues [BFAB_07:256809-259860 + strand] [cds] name=Bfab07g00710.1
ATGGTTTTCTCAACATTGGCCCTCGTGGGCACATTCGCCGCTTCGGCCACTGCATACTCT
GCAACTGCAAGAACTTTCGCTGTCAACCATTTCTATGGAACGGGACCTCTTCTCACCGCC
CGTATAGATCCAATCATCAACCCAGGAACTGTTGGATCACACGTTCATACGATTCAAGGA
GGCAGTGCTTTTGGTATGACTATGGGGGATACCACTGCTTTGGATGATTCTAACTGCACT
TCCTCGCTTGTCAAGAATGACAAGAGCAACTATTGGACTCCTTCATTGTATTTTGTCGAT
CCCAAAGATGCATCCAATATTACAGCCGTACCTATGTTCTACATGAACGTTTACTATTTC
TTTGAGCCCACCACCGACAAGATTACCGCTTTCCAACCAGGTCATCGAATGGTAGTTGGA
AACCCAGCTCTTCGTACGCCTCCAGCAGGAGGCGGAGCATCTATCGTCGATTATAAGCTC
GGAACACCCCAACCAGTCCAAGTTACCTGCCCACGTAGCAATTATGATGTTCCATCTTAC
CCCGCAGACTCAGATGGATTACACGGAGTAGGAATCCAGGACCCGCAAAACAAGGGAGCA
GGTGTTGGATTTCCAGATCAAGAGTGTGATGGAGTTGCTTCACCAATGCGTCTCGATGCT
CACTTTCCTTCATGTTATAACCCTGCTGCTGGATTGAATGATTATAAGACAAACATGGAT
TGGCCTACAGATGGAAATTGTCCAGAGGGCTGGATTCACACTCCTCATATCTTCTATGAG
GTTTATTACAATACTCCTCTCTTTGCAGATCAATGGGCCCCGGGTCAAGGAAAACAACCT
TTTGTTCTTGCTAATGGAGACCCAACTGGCTATTCATTCCATGCTGACTTTATCTCGGGT
TGGGATGTAGAAACTCTCCAGCAAATCATCGATAACTGCGACGCAGGTGATAGCGGTATG
GATAAATGCCCAGGTCTCATTGGTGGGCTCAATGATCCACAAACATCCTGCACTATCAAA
TCACCAATTAATGAGATTGTTTCCGGGTCTATGTCTATCTTGCCAGGTAGCAATCCACTT
GGAAAATGGGGCGCTGGTGTTGCTAGTGTAGCTTCTTCCTTCGTCGCATCCGCTACTTCT
GGTGTTGTTTCTCAAGCTTCTTCAGTAGCTGTCGGTGCTTCTTCAGCTGTTTCTTCTGCT
GTAGCTGGTGCTTCATCAGTTGCTGCTTCCGTATCAAATGTTGCATCGTCTGTATTAGAG
GATGCTACATCTGCAGCAAGTATTTCCATCCCAAGCATCTCTCTACCTCTCTACCAAGCG
ACACCTTCAGACTCAGCCCAACATTCCCAAACCCATACCCGCAACGGTGCGTTCACAAAG
GTCGCAGCAGCATCATCAGCCGCTAGCGAGGTCGTATCTTCTAGGGTCATCACATCCGGA
GGTCAAGTAATTACATCCATCGTCACCGTTCAGGCTTCCACACTCATCTACAAAACCGTT
TCGGTCACAGCAGGTCAAGTTCTTCCTACCGGGTCAAGCGTCTCTTCCAGCACTCCAGCT
GCTATCTCCGGATATTCATATGCTGGTTGTTACGCAGATCAAGAATCAAATCGCGCGCTT
TCCGGCGTCACATTTGCTGATTTGGGAGTGGGTGCTGTTTCTAGCACAGCTTGCGTGGCT
TATTGTGAAGGAAAGGGATATAGTGTTGCGGGAACTGAATATGGAGGACAGTGTTTCTGT
GGACAAAATTTACCTAGTCAGACATTGAATGCTAGTGAGTGTGCCATGGCTTGCGAGGGA
GATGCAAATGAGATTTGTGGTGGTTCGTTGGCGTTAAGTGTTTATTCTAAGAGTGGCGCG
AGTAAGAAGGAAAAGAGAAGTTCGAGACATTTGCATAGACATGTGCAGAGGAATTAG
>4b8291b1-57d6-414c-aee4-ef9b25a76230 (mRNA) 2859 residues [BFAB_07:266265-271153 + strand] [cds] name=Bfab07g00720.1
ATGGCGTCAACGACGACCTCAACTTCATCCTTGTCGTCAAGGCGGCAAAAGACTGGCGTG
GGATCTTTTACTATCAATGAGCAAATTGGTAAAGGGAGTTTTGCCACGGTTTATCGGGGC
ACACATATGCCCAGTGGAAATCTCGTGGCGATAAAGTCGGTAAACCTATCCAGACTGAAT
AAGAAACTCAAAGACAACTTATATGTCGAAATCGAAATATTGAAAAGCCTTTACCATCCT
CATATCGTTGCCCTCATTGATTGCAGAGAATCTGCCTCGCACATACATCTGATGATGGAA
TATTGTGAACTGGGGGACTTGTCATATTTCATTAAGAAGAGGGATAGATTGGCCGATAAT
CCTACACTTTATGATATGGTTCAGAAATATCCTATGCCAGTCGAAGGCGGACTCAACCAA
GTTGTAGTTCGTCACTTTTTCAAACAACTATCCAGTGCCATGGAATTCTTAAGAGAGCGG
GACTTCGTACACAGGGATGTTAAACCACAGAATTTACTTTTGATACCATCACCGGAATGG
ATAGCAAAGAGGGCGAAAGGTGGACCAGAAGCCATGAAGGCGAGCAAGGAATCCGTTGTG
GCTATGGTTGGAATTAATTCATTACCGATGCTTAAATTGGCAGATTTTGGATTTGCTCGA
TCCTTACCATCTACTTCGCTTGCAGAGACTTTGTGCGGTTCACCCCTTTACATGGCACCC
GAAATTTTACGTTACGAGAAGTATGATGCACGAGCTGATCTCTGGTCTATTGGAACGGTT
CTTTATGAAATGATGACCGGAAGACCTCCTTTCAAAGCAATAAATCACGTTCAATTGTTA
CAAAAGATTGAAAAAAATCAAGATGAAATTAGATTCCCTAGTAGGGGTATCTACAGCAGA
GATTTGAAAGATATTGTGCGACGTCTCCTCAAAAAGAAACCGGAAGATCGAATAACCTTT
CCAGAATACTTTGCTCACCCCGTCGTGACCGAACCAATTCCTGGCCTGGTTGGGGATGAT
CGACCAAAGGAAAAATCTCCGGAAACTTCAATTGTTCGCCAGCCATCTTTGAGAGATCGT
CAACGTGAAAGTCCAACTGTCAAGCATATTGACACGGCATATGAATCATTGATTACTAGA
GACATTGGGGAGCAATCTCCAAGAACTCCTAATATAGAATCTAATCAACCTTTTGGAACA
CCAGGTCGTAGCTCGGGTCGTCCTGACTCCAGAGATCGACCTTCTCCAGTTTCTGCTGCA
ACTGCTCCAAATGTGGATACCTTGCCACGACAAAGAGATCGCAAGGATCGCACGGAACCA
AATTATGCTCCTATTGTAAGAACTGGGTCCACGAAACAACGTTACGATGAGCAAGCGAAT
TTGCAACCCAAAAATGAAGTTCAATCGAGTAATTCCATAACTGAAGCCGAGCAAGATGTT
CGCGATGCTAGAGAATATGTTCTCGTTGAGAAGAAAGCTGTTGAAGTAAATGCTTTTGCT
GATGAGATGGCTGCAAACCCACGACTTGGACGTGCTAATTCAGCACCTAAACAATTGCCC
AGAAGACATACATCAATGGGAGAACCAAATTCGACAACAGGAGCTGTAGCTGTACCACCT
TCACGTATAGTTCAAAGAGCGTCAGGAAGAGCCCAGCCTGATACATCGTCCGCCAGAAAT
TCATATGGTTCTTATGGTAAAACTGGTAGTAGTCCATCAACTGCTTCAGCTATAGCTAAA
GCACTCCAAGGCGCGAGCGTCAGGGTATTTGGAGTTTCTTGGTCACCAACCCTCATTGGA
AAAGGTCCATCTCCACCACAATTATACAATCCTTATCCCGCTTATCCTACACCTAATGCT
GGGTTGATTGGAGATGGTCGACCTATTGATGAGGACCAAAGAGTTGTTAATATCATTGAG
GATTCTGCAACTCGAAGTGATGTTGTTTATGGATTTGCTGAAGTCAAATATCGACAGCTT
ATTCCTTTAGCACCTTCTATGAATCATGGCCTAGGAGGTCCAAATCCAGAAAGAACAGGT
GATGCTATGGATGAAGATGATGGTCTAACCGTGGAGGCTATTGTCAACTTATCCGAAGAA
GCACTTGTGTTATATGTCAAGTCATTATCACTTCTTTCAAAATCTATGGATATTGCAGGA
GCTTGGTGGTCACGAAAGCAACGTGGTGGAATTGTCAGTGGAGGTCACACTCCAGGAAGT
GATTCATCTTCAGCAGCTCAAGCAGGAAACCGTATTAACGGTGCAGTTCAGTGGGTTCGC
ACTCGATTCAATGAAGTTTTAGAGAAAGCAGAACTTGTTCGACTCAAATTGGTCGAGGCT
CAAAAAAGACTCCCCGAGGATCATCCAGGACACCCGAACAATCGTTCAACAGCCTCAAGA
TTGGTTGGTGGATCTTCAACTACTGATGGTGTTGTATTGAGCTCCGGTATAACCGCTGAA
AAGCTGATGTATGATCGTGCTCTAGAGATGAGTCGTACAGCAGCTATCAATGAGTTGGCA
AATGAAGATCTCCCTGGTTGTGAAATTTCATATACCACTGCCATTAGAATGCTTGAAGCA
GTTCTCGAAAATGATGAAGAACTTATTCCTCGAAAGAGATCATCAAGTTTACGGGAAGAT
AAGGAGAAATCTGAAGGGGGAGAAGTTAATGGTATCAATTTTGGTGATAGAAAGGATGTC
TTGAAAGTACTGCAAATGATTCGTACTCGTCTTCAAGTCCTCAAGAAGAAGATGACAGCT
ATTGCTAAACATCAATCAATGCCACCTCCATCATCATCTCCACGTCGAAGCTATAGTGGA
GGAACCACTCCTACCATCAATAATACTCCACCGAAATGA
>b85a8108-053b-47cd-ab3a-8042b28823e7 (mRNA) 1431 residues [BFAB_07:271599-274468 - strand] [cds] name=Bfab07g00730.1
ATGGCTCCCCACGCAGACACCCTGTCCACCAACGGTGACGGTAGCACACTCAAAGCCACC
GCCCCCACCTTCTCCCCCGTAACCAGCATCCCCGAGTCCAAATACCATTCCACCTCTACC
GCCTCCGCCATCCACGACGAGCACGCCTACGCAGCCCACAACTACCATCCCCTCCCCATC
GTCTTTGCACGCGCCTCAGGATCCTCCGTCTGGGACCCCGAAGGAAACCACTACATCGAT
TGTCTCTCTGCCTACTCCGCCGTAAACCAAGGCCATTGTCATCCAGAGCTCGTGGCAGCT
CTGTGTGCGCAAGCCCAACGTCTAACGCTTTCCTCAAGAGCATTCCATAATGATGTCTTC
CCTAAATGGGCTGAGAAGATTAAACAAGTGTTTGGATATGATATGGTTTTGCCCATGAAT
ACAGGAGCAGAGGCTGTGGAGACCGCGATCAAGATTGCGAGAAAGTGGGCGTATAAGGTT
AAGGGCGTTGAGCAGGATAAGGCGCTCATTTTTGCAGCGGCGGAAAACTTTCACGGAAGA
ACGATGACCGCAATCTCCATGTCTGTCGATCCTGAATCTCGCGATAACTATGGTCCATAT
GTTCCAGGTGTCGGTGCTGCATGCCCAACCACCAAGAGACAAATTAGATTCAACAATGTA
TCTGATCTCGAAATTGTCCTCGAAGCCCACGGAAAGAACACTGCTGCCTTTATTGTCGAA
CCAATTCAAGGTGAAGCCGGTGTTGTTGTCCCAGATGATGATTATCTTGCAAAGGTTCAT
GCTCTTTGCAAGAAACATAATGTCCTCTTGATCTGTGATGAAATCCAAACCGGTATCGGT
AGAACTGGACGTATGCTTTGCTCAGAATGGTCTGGTATTAAACCAGATATGGTTACCCTC
GGAAAGGCCATCTCTGGTGGAATGTACCCAGTCTCTTGTGTTTTGAGTTCAAAGGAGATT
ATGCTTACTGTTGAACCCGGTACTCACGGTTCTACATATGGAGGTAACCCATTGGGTTGT
GCAGTTTCTATTCGTGCTTTGGAAATCATGGAAGAAGAAAAATTGACTGAGAGAGCTGAA
AAGTTGGGTCATGTCTTGAGAAAGGGATTGGAAGACATGAACAGTCCTATGATTAAGTTG
GTTAGAGGAAAGGGCTTGTTGAACGCTATTGTCATTGATGAGACAAAGACTGGTGGTCAC
AGTGCATGGGATTTGTGTATGTTGATGAAGAGCAAGGGATTACTTGCCAAACCAACCCAC
GAGAACATCATTCGTCTTGCACCACCTCTTGTTATCAGCGAGGAAGACATTCAAAAGGCT
CTCGCCATCATCAAGGAATCTATCGCCGAATTACCAAACCTCAAGGGTGAGAAAGAAGAT
GACGTTATTCCTGCAGGCGAGAAGAATGTCCACATCCCATTGGAAAATTAA
>dcf2ddd9-d361-4431-9e08-d300564576cf (mRNA) 2145 residues [BFAB_07:275591-278510 + strand] [cds] name=Bfab07g00740.1
ATGTCAAATTCAATCCCGACCTCTAACAAAGAGGTAAAATCTTCTTCACCACCTACAATA
CCTTCACCTCCCCCCCATCACCTCAACCACAACCTCCCAAATCCAGATATTCAAGAAAAT
GGTCTCCACGCTCTCGTAAATATCCAAACCGCAAAAGATATCTGGACTTTCCTTCTAGTA
TTTAGAGTCTTTAATTCTTTTCTCGTCAAAACTTTCTTTCAGCCAGATGAATATTTTCAA
GCTCTAGAACCGGCTTGGGAAATGGCTTTTGGAGAGGGGAGTGGTGCTTGGATTACTTGG
GAATGGCATTATCAATTAAGATCTTCATTACATCCGACTCTTTTTGCTGCTGCATATTAC
TTAATAGATAAACCTATGGAATTTGTGAATTTCTTTCCTCAATTTAGAGCTGAAGTTTTA
GCTGTATTGCCAAATATCATTCAGGCTATTTTTGCCGCATGTTGTGATTACTATACTTGG
AAAATGGCAGAGAAAATGTATGGATTGGGTAGTAGAACTGGTTATGTTACTCTTCTCATG
AGTGTATTAAGTCCTTGGAATTGGTTTTGTTCAACAAGAACCTTTTCAAATTCTTTGGAA
ACTAGTTTAACAATTACTGCATTATATTTTTGGCCTTGGGACATGGCAATTAGTTCTGGA
GAGAAAATTAAAGAGGGAAGGAAGGAGATGTCGACTACGTCTATATCTAAAGGTGTTTTC
AGAACGACAGAAACCGTAAACCATCTTCGATATTCCCTTCTTCTTGCAGGTGTTGCCTGT
ATTCTTAGACCAACCAATCTTTTGATATGGTTTTGTGTCATAATGCCAGTCATTATGTCC
CTCATACCCGGAGTATCTCCAAAAACAACTAAACCACCTATCCCACAAGATTACATTATT
CTTCTCAGAGAAGCTATCTTATGTGGTTCGATCATCCTCATCATCTCAGCTATTTCCGAT
CGTCTCTACTTTGGAGAATGGACATTCCCACCTTACCAATGGCTTCATTTCAATATCTCT
CAAAATTTGGCCGTATTTTATGGCAAAAATGATTGGCATTATTTCTTTTCCCAAGGCTTG
CCACTTTTGTTACTCACTTACCTGCCATTCACGATTCTCTCGACATTCAAAGGCTATACA
CCATCTACAATGCCAAATCCGGAATTCACTTACAACCTCCAAATAATTCTAACACATCTC
ACTGGTGTGATGATCTTCGTCTTAAGCACAATCTCCCATAAAGAAGTTCGATTCATTTAC
CCACTTCTTCCTATTCTTCTCCTCCTAACCGCACCATCAATCACATCATTTTTCACACGC
GAAACTCAAATCCCTACAAACGACTCTTCCAAATCGAAAATCGAAACCGCAACAATCCGC
AAACCACTTCTCACCATTCTCATTCTCCTCAATATAGCCTTGGCAGCTTATACAACAATC
ATCCATCAATCCGCCGTGATATCCGTAACTACATTTATCCGCCACAAATACGAAACAGAA
ATGTTGGATGCGCAAGGAATCCCTCTTCATTCTCCAGACGCATACACATATCTAAAACAT
TACCCCGCTTCATTCGATGAGCACGCGCCCCCTTCGCTAAATATCGACTATGATATTAAG
AAAGAAGAAAATTCTCAATATGCAAAAAAGATGATGGGGACTTCCCAAAACCCGGATTGG
GATGGGGAAAATGGGGAAGGTGCGATACCCTTTGTGGGATTTCTAATGCCCTGTCATAGT
ACCCCGTGGAGAAGCCAATTGGTGTATAAGGGATTGGGGGCCTGGGCTTTAGGATGTGAA
CCTCCTGTACATTTGGAGATGGGGCAGAGGGATATGTATAGAGATGAGGCGGATAGGTTT
TATGATGATCCGCGTAGGTTTTTGAGGGAGGAGATTTTGATAGAGGGGGATGGGGATGGG
GAGGGTGATGGAGATGGAGATGGGAAGAAAATGTGGCCCCGCTATCTGGTGGGATTTGAA
GGGGTTGAGAAGGATGTGAGGGAATTTTATGAGGGGCTTGTGGAAGGAGCACAGGATGGA
GCGGGTAGAGGAAAGAAAATGAAAGAGATTTGGAGGGAGAGAAATACCCAGTGGATTGAT
GATTGGAGGAAGAGTGGCGATGTAGTGGTTTGGGAATTTGTATAG
>6d638fd5-7107-4237-b229-ebd3869166de (mRNA) 3042 residues [BFAB_07:279298-283028 - strand] [cds] name=Bfab07g00750.1
ATGGAGGAAGGGTTAGATTTGAATTTGGGTCTGCAGACTGCGATACGGGAAGACTCGGGA
TCCAGGATACAGTTGCAGATGCAAATGCAGCAGATACCATCGACTATGCAGCAATCGCAA
TCGCACACCCAACAATCGCATGCGCAGAAGTTGAGGGAGGAAGTTGCACGAAGAGGGGAG
ACGAGAGATACATTAACGGGAGAGAAGGCCCCGAGATTGGAAAGAAGTCCACATCCATAT
CATAAACGACATGAGGAGATTCCGTTTGGGAGCGAAAGAAGTGAGAGGAATCCGGTTATT
AGGAATTCGAAAGGAGAAGAATGGACTTCCCGAGTGCCTGCCAGGAAACCTTCTTCCTTA
AATCCCTCTTTCAATCTGAGGCCTTCTAACTCCCAAACGAGAACATCTTCTTCGGGAGCT
CCTGCGTCGCCGTCACCTCTACGTTCGGCACAAAATACCGACGATGAATTATATAATGGC
GTTAGAGTAACGATTGATGGATCATCAAATGGGTATATCGAATCTACGAACAGCGATAGC
GGGACTGAGGCAGATGATGAACATTTTCTCAAAGGCCGGCCTGCTCCGAGGACGAAACCA
CACAAAGGATTGAGGGGTGTAGATGGTAGTATGTCAAATACGCCCAGTCCATTGTTGAGT
CCGGCTATTTTGGATGATGAGATACGATGGAAGGAAAGTGGGAGGATTAGGTCTACAATC
CCGACTTCGAAGATAGTTACGAAGGAGGAACAGAGAAAATTAATCGAGAAGTTTAAACAG
AGGAGGAAGATTGAAATTGTCAGGAGAACAACTGAGGCGTGTTTATTATGTTTTGTGGGA
GGTATTATATATCAGAGTCAAGGAGCTAAGGAAATACTCTATCTGTGGAAGAATGAACTT
GGATGTCAAATTCTTATTATAAGTGGTTTGATAGCTTTATATCCACTTCGACTTTTACGA
CATCTAAGCTCACGAACACCATGGAAATCTCCATTCCCTCTTACTATACCTGCAACATTC
GATCCTGCTCCTTTATTATATCCTCCTACGATAACAATGCTTGTTTCGATTTTACTTTCA
GTCAGTGATCCTAGTGGTCTTTTACCAAGTATGATACTCGCGATATCAACATTACCGAAA
AAATTAATCCCTGCTATTGGAGGTCTTGAAGGAAGAGATATGTTACATTGGGTATTGGCA
TGTATGCCATTATTCACGACGACATTAACCAGAGCTCCATTCTTGAGTAAAGAGTCATTG
CCTCTGAATCCAGAAGTATTGGTTTTAATACCACCACTTCATCAAGCTTTATGTAAAACA
CTTTATTACCTCACAACTACTAGTCTCCTGGCAGCTGAACTACAATTACTATCAACCGCG
CTTATAAGCTTATTACTCAGAGCATCATCTCCGCAAGCAGTTATTCTAAAAGCACTTCTT
TGGGGTGGTGGTATAGGAATTCTAGTTACTTGTACACATGTTCTTAGATGGGGTGTTACA
TTAGCTCGAGTCCCTACATGGAGATTTAGAAGACCGGATCCTAAAAACTCGGGGTTCAGA
TTCAGCAAGAGATCTTTATCATTTGGTACAAATACGTTAAGTGTATTTGCCAAAGATAGA
TTCATCAGTGATACGAGTGATGACGAACTTCATAGCCGTTATTCACAAGAAAGGGGTGGG
AAACTACATTCTTCCGAATTTTCTCCTTTAGATGGAGAGTATTCGGGTATCTCGAGGAGA
AATAATTTACCGGGATCTAGTCCCTCCAAATTAAAAACTAGAACACCTTCTGGTCGGAAG
AAAAGATCGGCATCTATCAGTCTTCAATCATTTTCCAGATTAACTTATAGACAGGCTACA
TTCCGGAAATGGGGATATGCTATTTATGTATATATCTGTATTCTCGTTATTGTCCTGCTT
GGTATCAGAGAATACGTAGGGAAAGAAGCATTGCAAGGTTATGAACCCGTGGGTTGGGCT
CTTGGGTATATGTTTGGAGATTTGCCACGATTTAGACTCGAGGTCGTGAAGGCGAATTTG
CAGAGATGGATTCCGTTACCTTCTCGTTCCCATTCTTCCGATGATCTAGAGTTACACGAA
CGAACAAAGATTTGTTTAAAAAGAGGATGGGTAGAACGCATTCGTACCCAAGATTTCGGC
GCGGCAAATACGCGGTTGATACTCTTGGGCTACTGGCTCCTCATTATCATTACGGGTCTA
GCGATTGTTTTCCGTCTTTCGAAAATATATGAAGTGGATACGAGAAGAAAAGTTTTTCAT
TTCATGATGGTTTTTATTCTCTTGCCATCGACATTTGTGGATCCGAATTATTGTGCGTTG
GCTATGGCATTGGTGTTGGGTGTGTTTTTACTACTGGATTTACTGAGAGCGAGTCAGTTA
CCGCCGATTAGTAGGGCGTTGGCGAAATTTTTAATGCCGTATGTCGATGGAAGGGATTTG
AAGGGACCGGTGGTTGTTAGTCATATTTTTCTTGGGGTGGGATGTGCGGTGCCTTTGTGG
TTGAGTTTGGGGAGCTTGCCGTCTTATTCTTCTTCTTCAATGGAATTGCTTGATTTTGTC
TCGGGATCTGAAATCGCTTCTTCGAAGTTTTTGTCGTCTTCGTCTTTTGAAGGAGGAGCA
GAAGGAGAAGCGATGGATCCGTGGAAGGGATGGGAAATTCCACAGAGACAGAGAGAAATT
GCTATGGTGGCAGGAGTTATATGTGTGGGATTAGGTGACGCAGCGGCGAGTTTGGTAGGA
AGAAGGTGCGGGAAGAGAAAATGGTATTGGGGAGGGGGAAAGAGTTTAGAGGGGAGTATG
GCGTTTATGGTTGTGGTTGCTGTGGCGTTGGTGGGGGCGAAGGGGTGGGTTAGGGGAGGT
GGATGGGAGAGAGAGGGGAGCGATGCATGGAGTGTTACGGTGGGAAAAAGTATTGTTGCG
GCGGGGGTGGCGAGTCTAACGGAGGCGGTTCTGACCGGGGGGAATGATAATGTGGTTGTG
CCGGTGGTGCTTTGGTGTTGTGTTAAGGGGTTGGGAATTTAG
>1661f23e-42b5-47e9-a93c-53be70957ca6 (mRNA) 3312 residues [BFAB_07:283345-288845 - strand] [cds] name=Bfab07g00760.1
ATGAGTGCTCCTCCTATATCGTCTCTCGCATCGGGCGATACGGGTGTCGATCTCGAAGCT
GCATTCAAAGAGTCGCTCGGTATCGCTCGAGACGTTGTCAAGGGAGTGTTATTAAAGTCT
CTTCGTGTGTCATTCGAAGGTCACAATATTAGTTTCCCAGCTCAGCAAATACTTTCTGGT
GATGAGACATATAATACTCTTCTTGCCCTGCGAGATTCAGATTCACCCGCAGGCATGATG
ATAGACAGTGATGTTATTCAGCTTCCATATTCCGGAAATACCATCAGTTCAACTTCTCAA
TCGTCTGCGATGGGCGGTCAAATGAATCAAATGTCCTTCTCACCCTTGACTACGAGCAAT
CTCAACTCTCACACTCGTCCTGGAAATCCATTACAGCAACAACCATTCAATAATTCCAAT
CATCGACAACAATCTTCTTTTAATGCCACCCAAAGTCAAACCGAACTTCCACAACTTTCC
AATTTATTACGAACAGTGAACACAAACAACTACACTCAACAACAAACTTACCCCTCCAAC
AATAACTCGTATTCACTCTCTTCGAACCAACCTCTACGCCCTCAACTGCAACAACACATC
TCTGCCACTAAATACCCCCAAAATATGGACGACCTTTTCTCCCGATCCGATTCAGTCCTG
GCCTCGCAAATTCCCGCAAATCGAAGCAACTATCAACAGCAGATGATTGCTCGATTGCAG
AAAGATTCTCGAACTTTAGCAAATCAATCCTATTCAAGCTACGGTGGACAGGGCCCAATT
CCTAATCTAGAAAGATCGAGTTCGAGCAATTCAGTTTTGTCCAGTTCATCTTTACCAACT
TTGGCTCCTGCGCAAAAACTTCCACAAACCGAAAATCTACTTGTTGTAGAATCTCGATCG
AGTACGCAAAGTCGGTCAGAAACGCCCATGGACTTGGAAATGACTAAAGCTACCAACATG
AGGAAGCGCAAGATACAAACAGACGAGCAGAAGGCCGCCGCGAAGAAGGCAAGGCTATTG
AAGGTTTCTGGAAAGGCCGAAAATGCTGAAAAGATAAATAAATTGGAGGTAGCAAAGAAG
AAGGAACTTACAATACCAGCCGACGTTGTCATCCGCATTCTCGAATTTTGCCCTCCTATA
TTTCTCCGAAAAGCTCGTACTATCTGTCACAGCTGGAACAAGTGGGTCAATGGGTTGCAA
TCTATCCATATAAATTGCCGCAGAGAAAACTATGGTTACAACTTGCCTGATGAGATTCCA
GGTCTATCGGCAATGCAATATGTTGATCTTCTGGGAGGAAAAGGTTGCATGGAACCTGGT
TGTAAGAACAAAGATGCAAGCAGAACACACTGGGCTTGGAAAAAGAGGTGGTGTCTCAAC
TGTTGGAAGGGAAAGATTGAGAGAGAAGATCGCATCCAGAAACATCGCCAGCTCAAGTAT
TCCCTCCCTGTCATTGACAAACTGCTGGCATGCATTCCAGTCAGCATGTACGACTCTTTT
GGTAAACCTCATGATTACGTCGAAGAAGGAGACCCTGGAGCAATTCAAACGTCAACGCAC
AGACTATACAAATACTACTTGATTGCCGACGTCGAAAACATCATAAAGGAATATGAAGCA
CTCACACCCGATCCATATCGTGAGGATCCTACACATAACGATGCGCAGAAAGCCACCGCC
CGCCAGATTTGGGAGGAGAAGATGGAAAAGTTAGAAGAAGATCGTGATGCCTTCTTCGAA
GCGAAAAAGGCTAAGAACGCAAAGGTCATGCAACTCGTTTTACAAGTCGAAGCAGCAGTC
CGTGAGAAGAGGGCAAAAGGTCGCAAGCCGAATGATGCTAATCGCGAAAGCCGGAGAATC
CTCTTCTCCACACTTGCGAAGCGTGACCTTCCAGATATTCCAGAGGACTTTATCGCCAAC
AGCAAGCCATTCAAAGCAGCCGTTCGAATCTTCAGAGATGGTGGCTCAGAACGAGGTTGG
AGAGCTTTGAAGCCGAAGATTCAAGCAGTCTACCAGCAGGAGCAATCGAGAAGGACTGAC
CAACAAGCCATCGTTCCTGCACAAGACGTACCAAGCCGGGGTAATTTAGACGAAGACTTT
CAAATGACTGGGCAAGATCTCGAAAACTTTGAGCAAGCTAACGATGCTCTCCGACAAATT
GGCAATCAAGGTCTGCAACAAAACACACAACAAAGTCAACTGGAAAGATATCAAATTCCC
ACATCAGTTACAAATAATAGGTCGTCTCTTGCAATGATCCATGCTGGTTCATTTGATTCT
GGCAAGGGCGCTATGGCTACAACGTTACGACCATTGAACAATCCAACAATGTCATTTCCA
GGTGGTCTTCCGCTCCCCAATGACTCTTTGCTCAACACTTCTCATAACAATGCCGGTCCT
TCTGTCAATTCGTTGAGCAACATTTCTCACAACAGTGGCTTTTCTGCCAGCTCATTGGGT
CGCCTCTCTGGAATCAACAATGGCTCTTTGATAGGCTCAACGAGCATGTCTTCTCGCAGC
AATAACGGATTTCCTGCCAGCTCAATGAACTCTCTTACTCAAAATCACAGTTCCATGATA
TTATCTAACAGCGCTTATGGAAACAGTGGGCTTCCTGCCAGTGCAATGTCAATTCTATCT
CAGAACATGGGTTCATCGAGCAGTGCTTCCCGCAACATTTCAATGGCCTCTCTTCCTCAA
AACGGCAACAACTCTTTCATGGGTTCACCGAACAATGGTCCCCACAGCGCAAATAACAAT
CTCACCAATTCCATGGCCTCTCGGTCTCAAAGCATGAACAACTCCTCCATGGGTCTGTTG
AGTAACAGTTCCCGTGGCACTCAAAACAACATTGGTGATTTCATGAAAAGTGCTTCTTAC
GGCAACAACAACTTTTCTGCAAATCCAATGGCCTCCCTGTCTCAGAGCATTAATAGCGCC
AATGCTAGTTCACCAGAAGACTTTTTTAAGATGAATCCTTATGGTACTTCAAACCAAATG
TCTCAGAGCAATAATGTATCCTCTGCCAATGCCCTGGGCGACTTTTCTAGCCACTCTACC
TACAATAATGCTATTAATTCTGGCTCTTCGAATCATCTTACCCAATGCAATAATACTTCG
TCGCTCTTACCTCCTCCTCACTTGAGTTACGCCTCTCAAAATAACAACGCTTCTTCTGTC
AACCCATCGAACCAGGTTTACCAGAACAATGGCAGCTCATCCAATTCATCAAACCCGGGA
TCATCTACAACTTCACGAAGTGCTATGGCTATCTCCTCAATTCTCACGGGGACCCAACCT
CATGGCAATTGA
>9d31d1a4-c7a3-469c-893b-78254b223563 (mRNA) 1542 residues [BFAB_07:291110-293499 + strand] [cds] name=Bfab07g00770.1
ATGGGTTTACTTGGTTCAAAAAATAAAGAAACGGGATCTTCCCCTCAACCCTCATTCTCA
GAGGATCAAGAAGCCGCTTACAAGGGAAATAATAGCTATGTACCAGATATTCCATCGGCG
GAGGGTCAGCCAGAATTCGATGAATTGCACGTGGTTTGTCCTTCGCATACAACGGAGGCC
AAACTTATGCGAAAAATCGATTTACGTGTGATTCCATTTTTATGTATCTTGTATCTTTTG
GCCTTTTTGGACAGAGTCAATATTGCCAATGCCAAATCTTTCAAACTCTCAACAGATTTG
AAATTGACCGGCACTCAATACAATACCGCTTTGACCATCTTCTTCGTCCCATATGTCTTC
TTCGAGATTCCGTCAAATATCCTCATGAAGCGCCTGAATCCAAACATCTGGCTTTCATCC
CTCATGTTCCTTTTTGGCCTCGTAAGTATCTGTCAAGGACTCGTACAAAATTTCTCCGGT
CTCCTCGCAACCCGTTTTTTCCTCGGTCTATGCGAAGCTGGTATGTTTCCTGGCTGTTTC
TACCTCATCGGTATGTGGTACAAACGATCCGAAGCCCAACGTCGTTACTCCTTCTTCTTC
AGTAGTACCACCTTAGCTGGAGCATTCGGAGGTCTTCTCGCTTCCGGTATTGGAAAAATG
GATGGATTAAGAGGATATTCCGGTTGGCGTTGGATTTTTATCATTGAAGGAGTCCTTACC
TGCGTTGTCGCCCTAGCATTCTTCTTCCTCATTCCTTCATTCCCAGAAGATGCAAAATGG
CTCACTCCAGACGAAAGAGCATATGTAAAAGCTCGTCTCCAAGTAGACCAAGGAAGAAGC
GCAGCAGAGCGTAAAATCACTTTCAAAGACGCATGTAGGGTCTTCAAAGACTACAAAGTC
ATTCTCGGAGGTTTCATGTATTTCGGCATGATTATCCCAGCCTACGGATACGCATTCTTC
GCACCAGGTATCATCTCCACCTACGGTTACTCCCCAATCCAAACACAACTCCACAGTGTA
CCTCCATGGGCGTGCGCATTCGCATTCGCAATGTGCATTGCCTTCGCATCGGATTTCACA
CGTCATCGATTCGCCTTCACCATCGCGCCGATTTGCGTCGCAATCACCGGTTTTGCTATC
CTCCTCACCGTTCACGATAATACCAAACTTCAATACGCTGCGCTTTTCCTCGTTGCAATG
GGTGCCTACGCCGCCATGCCCGTCATCGTCTGTTGGTTCAACATGAATCTTGGCGGTCAT
CACCGTCGCAGCGTGGGCACGGCGTGGCAAGTCGGATTCGGTAATATCGGAGGAATTATC
GCTACCTATGCTTTCCTTGCTAAAGATGCCCCGGAGTATAAGACGGGATATGGAATCTGT
CTGGGATTTTTATGTTTGAGCGCCATGTCGTGTTTGCTTTATTTCGTGGCGGTCATGTTG
GAAAATCGCCAGAGGGATAGGAGACCTAGGGATTTGGGTCTTACGGAGTATGAGAAGACG
GAATTGGGAGATTTGAGTCCGGATTATAGGTATTTATTGTGA
>1823ac26-b395-4699-ab5d-7066a70b9a8b (mRNA) 966 residues [BFAB_07:295370-296640 - strand] [cds] name=Bfab07g00780.1
ATGTTGCTCTCTGCAACCTCGCTTTTACTCCTCACGGTACCTGCTTTCGGGCAGACCCTT
AATGCCTGGAGACAGACCGTCTACGGAGAAGGATGCTGCGGCTATGCTGTAGACGGGAAT
GTAACAACTTCCGATGAAGTTGTCTCTTTACCAGATACTCTTGCTCTTCTCTTCAACTTT
CAAGCTGGATATATCGGTTTTTATGTTCAGTCCTCCGGTGCTTACATTACCGACTACTAT
GTTGAAGCTGTTGAGAGTGTGACGTTCAAAGAGATTATTGTTGGAAAGGTTTCCAACGCT
ACATCCAACTTTACTGTTGTCAATTTTTACGACTCTGTTGGTGAAGCCGGAATTTTTACA
GATACAATGTTTTTCCATGTTACTGGAGTATCTGGTGGAAACAGTACCGCATTTGTCAAC
GAGATATATCCCATCTACCCAGGCGATACCATTGTATACCCCTCCGGGCAATCCGCCCAA
CCCTCCCCAACCCAAACTACAACTGCAATCCCAGCACCAACCACAACCGTCTATCCCACA
CCCACAGCTCCAGGTATAACCCTCAATGCCTGGCCCACCATCTCCGCCACCAAGCCCGTC
GTTCAAGACAACGCAGGCACATACGTCGATGGTAATCCATCCACCGGCTTAATCTCCTCG
CGTTATTTCCTCCTTTTCAATAGCGCTAGCACATACGAAGGATTCTACATCTTATCCCAA
TCACCCGACTATATTACCGATTACCATGTCATTGCGCAAAATCCTATCACGTATGCAAAC
GTTGAAGTCTGTCGCGTCACAAATGCTACGTCAAATTTCACTCTTTGTGCATTTAAGGAT
GAGGATGGGAATCCAGGGTTTAGGAGTGCAACGATGTTCATCTATCAAGATGGTGCGGAG
GATGGGAAACTTAACGATGTTTATCCTATTTGGCCGGGTGATGTGATTGTTGACCCCAAT
GCTTGA
>cc28f77f-b262-4317-aa19-86dc28a6a611 (mRNA) 1200 residues [BFAB_07:297399-299210 - strand] [cds] name=Bfab07g00790.1
ATGGAAGGAAAGAGCACAGAGAAAAAAGCCAAGGACATAAAAGCTAAAGACATAAAAGGT
GCACGGAAAGAGAAAACTGACAAGAAAAAGGAAGAGAGACCGACTCATTCCTCATCTCAA
TCATTACCACCACGAACAATCTCTAAGCCTAAGCCTGACGATGGAGATGTCTACAAAATA
TGTGTAATGTTCCTGCCACAGATGCAGAGAATTGTTGAAACCGGAATGGTTCCTTGCGAC
GGAATTATTCAGCAAACACTGCGTGGGTTCTTGTGTGGACATGGAATAGTACCTGTAATT
AGAGAGTTGGCTTCCAAAGACGATTCGGAACCAGGTGAAAGAGCTCATCCAAAGGGTACT
GGATCTTCGAAACTCACAAGTGCTCTTGTGAAGCTTTTTAATGAGAACGCGCTTTTGGGA
GAGGGAATGGACTTCTGCCACAGTCTTCGAGATCCAGAAAAGGAGAAGGCTATGCGTATC
GAATTTATTCCAGGCGGTAGCATTCCGGTTCAACTGCCGCTCAAGGAGAGAGATGTCTTA
TTTATTGAAAGCCATGAAACAGATGATCGGCCATATCTCATGCAGGATAATTTTCCGGAC
CACATCAGAATTTCTGAAGATGTCTTATTTAAAGCTTGTCCTTTCATACACTCGGCATTC
GGTGCGAAGGATATCGGGAAATTCGCTGACCCTGACGATACTTGCTTGTACGATCCCGCA
TACACGTCGAACCGAAAGAGATGTATTCGTCAAGCAAAACTCGTATATATAGCCGATCTG
ATTGCTTCATCCTATGGGCGCACTGCACAGGATTATCATTCCTTGAGCGATTCAAAACAA
ATTGATAGCTGGCCAAAGGAGAAATTGTGGAAGCACACTAAGTCTTGGGTCATGTTTCTA
AGAAATAACGACTTTAGTGAGCGCATATCTTCCAACCATGAGCTTGACGAGCTATGCATG
CTTGCCGCCTTTTTCGGTGCTAAAAATAATGCAACCACCGCTTTAAGAAATGTGTACCAG
GCTCAGAAGGAAAGGTTGATCAGAGAAAAGACACATCCGAGACCTGTTTTGTTACCAAAA
GAGGAACCCGAAAGAAAGAGATTGTCTCCCGAGAGAGCAGCGAGACAGAGCGACTATGCC
CCAAGCGAGATCTGTAACGAGATGCTCGGTACTACTGGTTGGCGCAGTCGAGATGACTGA
>eb49fea4-d530-45cc-982a-22dcdf36b3ff (mRNA) 1404 residues [BFAB_07:299954-301943 - strand] [cds] name=Bfab07g00800.1
ATGGCTAACGTGAATCACCAACCTGGTCTGGCTAACGCAGCTACCCAACGTGAATTTGCT
TTTAGAATATTCCTACATCCACAACGTCCTATTGATATCAATGCCACTGAGATATGCGGT
TCGTTTAACACACCTCAAAAGCCGCCCTTGTCTGGTAACCATACCGTTATGAACGCTGGA
ATTATTTCGCGACAAGGAATCTTTGCTTGGGTGAGAGGAATCATCAATGAGCTCATATCA
TTCAACCTAAATAGTGTGAATTTGGTCCCTGCTCTCTGGGGACAACTATTCAAGATCATC
CAGAATCATTCCTTCTTTAAGCGTTGGATCTTTTCTCGTCCCAGACCTGGTCCAATGGGT
TTTCTGACCGTTGTTCACGATCCTAGCGAGGAGATACAATATACTGGAGAAAATGTTCTC
GGTAGAGCTCAAATAATTTGGCAAGAAATTGAAGCCGATTTGAAGAATGAAGAGCCTAAT
CAATTTATCGGCGAGATCTTCCAGCAAGTATTTCATATCTGGCAGTATAAATGCTTCATG
AATAACATGTTGATGGATATGAGAGGTCGCCCACGTACAACGGAACGTGATACATTTTCA
GAGCTTGTACGCTATGGACTAATTCGACCATTACCACTCCATAATCATCCAGCACCCCAA
ATTAATCCTCCAGCCCCAGCTCTCCAAGTTCCAGCTTATCAGCCCGCTCACCCTCCACAG
AACCTCGTTGGTGCCGATGTTGGCATTGTTGGTCATCCATCCATCATCGGAAACCCTAGT
AATAACCCTACCCGTGGAGCTTCGGGTGCTCGGGCGGGTGCTGAGCCAGTGACCGGTGTG
TCTGTGGCTGCTGGTACTTTAGAGATTAGCGACGATGAATCAAGTGGACAATCTGACAAC
ACAAATTCTGCTTTCAATCAGCCCTATCCCCGCATGCCCACGCCTGAACCTAACACCGGC
AGAATGGTGAGCACTCTCATGCTTTCAGGCAGCGCCCTTGCCCACACCCTACGCGGAGCA
AATCACGTCGTCTCGTCTGCTATACCTAACGCTGTTCAGGCAGGTAGATCTAACATTCCC
GCTGCTTCGGTCCCTCAGAGTAACGGCAACCAACAAAATGGCAATGCCCAAGGTAATGGA
CAGCCACGTCCAAAACCAGGTGCTACCATAGAACAATCTAGACCACCTCAATCAAACCTC
CATTGCCATTCGAGCACGAGACGTCAACTACACATACCCCAGATCCCACCATTTAAGTCT
GCAGTTCCAGGTAGCTCTACCGCTGGTCCAGTAGCAACTCAAAAGCGACCTGCAACCACT
AGCAGCAGCACTAGCTCACCTTCAGATCCCTCGAGACCTTCTGGCAAGAAGTTCAAGATG
GAGAGACCTGACGTTGATCATTAG
>53c768e2-9d35-4dc7-bd2f-8325a775e6e6 (mRNA) 2232 residues [BFAB_07:302699-305396 + strand] [cds] name=Bfab07g00810.1
ATGTTCAACCCATTTGCGCGATCCAAGAACGATCTCCCATCGATGAATCGACATAGCATC
ACAGCCTGGGCCCACGATATTATCGATGAACTGCAAAGAATCGGTACCTTGAATTCAGGC
GATGAGAAGGCTGCAGATGATATTTTTCGAGTGTACCAAAACATGCTTCAATTTTATTCA
TGGGTGTGCACACGTCCTAGAATTCATGTAACTCATGCCCAACGTCCTATCCAACAGCCT
TGGGCACAAAATGACATTTTTGCTTCGGCACATAAGGTCTGGAGTGATCTTGAGTGGGAA
CTAAGGCTAGAGAAAGATGGCGCGTTTGTTGATCAGATGATTGAACATCTCGGGTGGTTT
TGGAATGTTAAGAACAATTTGGTAAATCAAGCCCGCCATACCCGTGGACTCCCTGTCCTT
TCAAGCATGCAAACAATGGCGGAAGCGGCAAACTATGCTAGAATTAGCAGCATCGATCGT
GCGAATATAATTCAAACTCCAGTGTCGAGAACCATAGCATCGGGTTTTCACTTCCACCGT
CCCGTGGCGCCTGCGAGCAGAGACAATCCGAGAAATGTTACAGAAGCTTTTCCTGCAGGA
CAAAACACAAGACGAGGAAGCTCAAGCGATGATAATCTGCGTCCGAGTCAAACATGTTCA
TCCGAAATTCCATCTATACGACAGCCGAAAACAGGTCATTTGCAACTCCCAAAATATTCT
CAATCAGTTCAGGAGCCGCCTAATTCTGCAATGCCAGTCGCTCTATCGGTAAAAGGCAAA
CATTCGCCTCATTTACACCCCGGTGCATGCTACCAACCACCCACTGCTCGTGATAAGTCG
TCGCACAATGTTGTTAACATGTCGGGTGATAAATATAACGACGGTGTTGAATATTCGCAG
ATCTCTCAGGTTCCTGTCGGCCTGATCCTACCTGCACCACAAACTCGAAATGACAGGTAC
CCCAATAGAGCCCAGGGGTTCGGTGATGGATCCAAGCGTCTTACGACTAGTATACCATCT
GTCAAACCAGCTTTTAGTGGCCGAGAAAAGCATGGAAGAGATTTACCGAACTCTCACGAT
GGACAGTTAGCACAATCTCATAGCGATATAACACGTACCACGGCCGGGAGTTATTCATCT
AACATCAGACATCCTGTCAATACCCTAAGTAACGATGTGATCGTAATCTTAGATACGCCG
TTACCGGAATCAATAACTACACCTATCGAAAGACTCAGGCCGAGAGATTATCGCTCCCAT
CCAAGTTCACCCGCTATATCTTCTGAAGATAAACATGAAGTTGAACGTCCTTTCTCAGTA
GGAAGACCTCCTGTACATAGCAGAGACATAACTAGGCATTCTATCTATCCGATTAATCCT
GCGGGACCTTGCAATCAACGCTTAGTAGAATCTGCAGAAGTAGACAAAATGAGAAGCGAA
TCTTCTGATCGACGATCAACCAAACAGGGAAGCGATGGTACGGGAGAAAAAAAGCAGAAA
AGAGTCACTGAAGTTAGTGATAAGAAGGCCAATGCCATGGAGAGCGATCTGAGCACACCC
AAGGAGAAAAAATCCACTCCTATCAATGGCGATCAGCGCAATATGAAGATTGACTGTATC
GGAAAAGACGAGAAGACATTGACTAGTTCTATCAACTTGATACAGAACTACAGGATGAAT
GACTTCCGAAAAGCCAATACAACAAGACCTGAGCCTATCAATACTATTTCGGCAAATCAA
ATCAAGAGAGCGAGGATCAGCGAAAATTCCACAATTTCCTCTCCTGGTTATACTTCTCCT
TACACAAACTTCCTCAAGCAGTACCAACTGAGCAATCTTAATAGTCCTAAAGGATCGGGA
ATAATCACAAATTTCGCCGGAGATAAGGGGGAGGAAAACGAAGCTGTTGGCGGTGGGTAT
ATTGGCGAAAAAACTGGCAATGAAAAGTCTGTTGGCGAGAAAACCCTTGAAGAAAGCACC
ATCGGTAGCAAACATATGAACCAGAAGTCTATCAACGAGGAGCTGGTTAGCGACAGATTC
ATCAACGAGAAAGTTGTCAACGAAGACTCTACTGGCGATGAAATAACAGTAGAAGCTCCA
GCTATGGAGGACGCTGTGAGCAAGAAGACTTCGAGAAACAAAGTCGCATCGGAAAAGTCG
TTGAGAAACAAGCCACTTTCTGCGAAGGGCAAAAAGTCCAAATCACTCTATCGTCCTTTC
AGCATGAGATAA
>3fc4849e-5276-4b61-bcd6-488302973ee0 (mRNA) 360 residues [BFAB_07:308478-309573 - strand] [cds] name=Bfab07g00830.1
ATGGTTTTCATCTTGGGGATCTCGTTCGCTGAGAGGAATCTGGTGAAGAAATCTCTAGAG
TCTTTCTATGGCTTAGGGAACCAAGCTTCAGCTCGTATCATGGCCAAGCACTACATCCAT
CCCACGGCGACTGTCGGTTCCTTGTCACAAAAAACGGTCACATCTTTGACCGCTGAGCTT
TCCACCATGCCTTTAGAGACCGAATTGAAACGAAGGTTGCAGGATAACATCGAAAGAATG
CGGACAATGGGTAGCTACCGGGGGAGGAGGCATGCGATGGGCCTGCCAGTAAGAGGACAG
AATACGAAGAGTCAGATATCAACGGCCAGGAAACTCAATAAAGTACATAGAAAAGGATGA
>7fb72513-cf82-49ae-abdd-d77494194673 (mRNA) 879 residues [BFAB_07:309723-310959 + strand] [cds] name=Bfab07g00840.1
ATGCTCACACTTCAACGTTTTGTAGTCTCTGCACTACTTATCTTAACTGTCACCTTTCTC
TTCTTCGCCCAAACGGCCGAAGCTGCCAAAGGACCCAAGATTACCCACAAGGTCTACTTC
GACATCAGCCATGGCGATGAACCCATGGGTCGTGTCGTTCTAGGTCTTTATGGAAAAACT
GTCCCTGAGACTGCCGAGAACTTCAGAGCTTTGGCAACTGGCGAGAAGGGATTCGGATAT
CAAGGCTCTACCTTCCACCGTGTTATCAAGGGTTTCATGATCCAAGGAGGTGATTTCACA
AAGGGTGATGGAACCGGAGGCAAATCAATCTACGGAGCTAAGTTCCCAGATGAGAACTTT
AAGTTGAAGCATTCCAAGAAAGGTCTTCTCAGCATGGCCAACGCCGGAAAGGATACCAAC
GGTTCCCAATTCTTCATTACTACTTCTACTCCTGGTCATCTTGATGGTAGACACGTCGTC
TTTGGCGAAGTTTTAGAGGGATATGAGATCGTCGAGGCAATTGAGAACGTAAAGAAGGGA
GGATCTGATAGACCAGTTGAGGCTGTCAAGATCACTGAGAGCGGGGAATTACCAGTACCA
GAAGAAGATGAATACGGTACTGCTGAATTTCAACACGGCATGGAAGAAGTCGAAATTCCT
CTTACACCAACCGATCCTTCAACTCCCGCTGCTGCCACTGCAGTCATTCCAGTTGTTGGT
ACCCCACCAAAAACCGAGACAGAGGAATTTGGCTATGCTGATGAGGCTGGTTACACTCTT
TTGCAAAAAGGATTGTTTTTGGCTGTTATTTTAGGATGTGTTGCCTTCTACGTACGAATG
AATAGAAGAAACAAGAAGTTTGAGAGGTCACTCGTCTAG
>d2aa0df7-8136-4170-8655-f370317f09a1 (mRNA) 1221 residues [BFAB_07:314322-316097 + strand] [cds] name=Bfab07g00860.1
ATGGATTTCTCTTCGGAAATCAATAGACCTACCGTCATTCGAAAGTTTGCCCTAGATAAA
GACCATCAACCCCCAAAACTAATAACCTTTCAATCAGTATTCCTCAAGAATGATCAGGAA
AAAATTCGCATGACCGAGGCATCGGAAGCCATTATCTTTAAAAAGTTACCTTTGATTCAG
ATACTATTTGACTTAAAGCTCAATGGGATGTTGAAAGACGACAAAGACCAAATTTGTTAT
GATCCAGAGCACGCAAGAACGGAACGACCCGTATTGCCCAAGGTCCCGGGAAAAATAGTC
TACATGTACGAATTTATCCAGTCGAACTTTCAAAATAGAGGACAGGATTACGATCAAATT
GCGAAATGGAACATCGGGACGCTTTGGACAATGATTGATTGCCTTGTACGTTTCTTGGAT
GGAAAACCTTTACCTCTCGATTCCAAGATGGGTCTCATGAAAAAACACTGGGACCTCGAA
TTGATAGGTATTGAAATACTTGCAGTATACCTTGGATGTATTGAAATGAGTGATGAAGCT
GTGCGCAACGCGTTGATTTCATATATGCGCCGGCTTCCTACCCCTGGATCCACAAACTCT
AAAGATAGCTGGGAGAGAACATTCGAAACAACGAACCATGCGAAAGTGTTTAATGGGAAC
AAATTCAGACAGCCTGAGATTATTGACTTGACCGAAGACCCGATTGCTGCCCCAAAGACT
TTGGAGAAGAAAACGCAATCAGCAACCAAGTCACAGATGATAAACATAGGTCAATTAGTT
TCTGTTACAAAGAGCTTGGGTATAGAGCCTCCACCATCTTCTACATTAGAAAATTCTGTT
CAAGTAGCTCAGTCAAAATTGATTTCACGGAAGTCGAAAAAGGGGAGCCAGCCGTCTGCT
ACATTGCAAAAGTCGAAGAATACAATACAATCGAGCAAAGAATCCCATCAAACTACCACC
CCTCAGACGTCAATCGAAGCAAGTCGATCGAATTCTGCTCGTAAAGGCCCTCAACTTATG
CCGATCGACGCATATATTAGCCTGAACCAAACATACGGTTGCTTTCTTCATGTGCACATA
GGCTCAGCAATGAAGGGCTCAGGCTTGATTGGCCGACTTCTACAGGACTTGCATATGGGA
CTCTTCAACACCGGAGATATGTCGAAAGTAGCTGGAAATAATCGCAACGGAAAACTATGC
TGGTTTGGGATGAGGTTTTGA
>8c3ad956-f502-41ce-a070-21afa56abcf4 (mRNA) 1491 residues [BFAB_07:316135-319013 - strand] [cds] name=Bfab07g00870.1
ATGTCACAGGCTAAAACAAAGCAGTCGTTTCGGTCGTTTATATGGGACAACGACACGCAC
CTCAAGTCTGTTGAAGAGCGAAAGCTTCTGCGGAAGCTTGATGCTGCTATTCTCAGCATT
GGATGCTTAGGCTTTTTCCTGAAATATCTTGACCAAAACAATCTTACAAATGCCTATGTT
AGTGGTATGCAGGAGGACCTCAAGATGTTCGGCAATCAATACACCTATGCTGGAACCTTT
TATAACTGCGCATATGCTATTATGCAAATACCATCGACTCTCATCATCCAAAAAGTCCGA
CCGAGCTATTGGCTAGGGCTCATGGAAATTGGCTGGGGAACTTTTACTTTTGCACAAGCT
GGAATGCACAGTGTTCCTCAGCTGTACGCATTTCGCTTTCTAGTCGGGCTTTTCGAAAGT
TCATTTTTCCCATGCATGCTCTTTATACTTGGCTCGTGGTATACCAAGACTGAGCTCGCA
AAGCGTATTGCTATATTTCACATGACTGCACCTCTTGGAACAGCGTTTAGCGGTTATCTA
CAAGCTGCTGTTCACACCAATCTTAACGGACGCCATGGGCTTGCGGGCTGGCGATGGCTA
TATATTGTGTGTGGGATCATGACTCTTCCCGTCGGGTTTGCAACAATTTTTCTTCTCCCG
GACACACCGCATAACACGCGAGCCTGGTACTTAACAGAAAATGAATGCGCGCTTGCAATT
GAGCGAGTTGAAAAGGCCGGAAAGGCAGCTCCAGTACCAATAACATGGGCCAAAATTAGA
CGCATGTTCACTAGATGGAGGTGGTATGCGCTCGTATCAGGCTATATTCTGTACGGAACA
AGTTGTGCAGCAAGTAGCTATTTTGCTATTTGGCTCAAATCTGAGAAGTTCTCAGTTACC
TCGCGGAACGTTATCCCATCAGGTGCTAGTTTAATATCCGCTTTCTGTGTCATTCTATGG
GGTTTTGGTGCAGACTACTCTGGCAGCCGGTTTGCATTTGTGATTGGACCATTAAGTTAT
GGGTTGACTCCTAATGGTATTCTTGCTGTTTGGCCGAAAAGCGTGAAGCTAAAGAAGTTT
GCGTTTCTCACGGACGGTGTTCAAATAATGACTGCAGTCTTTTATGCATGGGCAAATGAG
ATATGTGCAGGAGATAGTGAAGAGAGAGCTATTGTTATAAGCAGTATGAATGGCTTGCAA
TACGCTGTCGCAGCCTGGCTTCCCATTGTCATTTTTCCGCAGACCGAAGCACCCACATTT
CGACGTGGCTTCCCAGCTACATTTGGATTTGTCATCGCGGCTCTCCTCGCCATTTTACTT
ATCCAGTTCTTTCACAAGCGCGAGTTGAAGCAACAAAAAAAATTGAACCACGAAGATTCT
GAAGCAACAAATCATGAAGAGGTTTTCTATGTCGAGAATGAGCCGACTAAGGGGGTTGAG
GGCGATGGGTTTCGAGAAATGGCAACAGCTGGGGCTGTTGCTTCCCACTAG
>6e1f24a9-41b1-4285-921c-0633e5673876 (mRNA) 1188 residues [BFAB_07:319513-321331 - strand] [cds] name=Bfab07g00880.1
ATGGCTATGCGCAACTTGTCGTTGGAACCTGATGATTCAGATTTTGTTGGTTTATGTTCA
GTCCTTCTGCCTGAGATCCAGAAAATTGTGAAAGATCGCAGAGTGTTGGAAGATTCCCCA
GTTCGGCCATTTTTAGAAGATATATTGCGCCATGATGGAACACTTCCCGTTCTCAGAGAA
CTTACTAAAGTCACAAAGTATCCCTCAGTCAGGAGAGCACATCCAGATAGGATACCAAGT
ACTAAGTTATCTAGAGCGCTGGTTTCCACCTTCAACAAAAGCATTGGACAGGATGAAATA
ACTGTGCAAGACTATGTACGCAATAAACGATTGAACAATAAGAATCATTATCCGGCGATT
CAAACAACCAACAGGCTTTCATCCAGTTATTTTGGTACTACAATAGTAGTGCCACCTCCA
AGGCCAATTCAATCGGTTCCAAAAACGTCAAAAAAGCCAATACCTAGTATCTCGGAAATT
TTGCAAATGCCCCCGCTGAAAGACCGAAGAGTTTATTTTCTCAAAAGGCATGAGACTTCA
GACGTACCATATTTGGCACAAACCGAATTCCCAGAATTTATTACCGTGGGAGAAGAGAAA
TTCTTTCAGATGTGTCCCTTTGCAGGTTTTGCATTTGATGTAAAGCGAATCGGGATATTC
TCAGATCCTGATGACAAGGCAATATATGACCCTGAATCAACCCGGAACAGAAAATTATGC
ATTGGGAAGGCGAAGATCATCTACTTGGCTAACTTGATAGACTCTACCTATTTCCGTGAA
ATACGAGGTTCTCAGTCCTCGTACGTTACAAGAATACTTTGCGGATGGAGTATCGAAAAG
ATATGGTTGAACACGAGGACTTGGGTACTGTTTGTTGATGGGAAATCTTTCGAAGAGCGA
ATTTCTTCTGCGGCGGAGTTGGATGAAGTGTGTATGCTTGGTAATTTTCTGGGTGCAAAC
AAAGAAGCAACCGGTCTCCTACGGAAGTGGTACCGTAATCATAAGTTGAAGGATCATCAT
GGGAATTCTTCAATAAGTGGTAATTCTCTTGCGAATAAGAGAGCTCTGCAATCAGATGTA
TTGCCGGTAGAGGAGGAACAAAGTAAGAGACACCGTGGAAACGATTATGTTGCGGATGAA
GTTCAAAACGTGACTTCAGACCTGGGATGGCGACATCGTGATGATTAA
>9365fb66-a3c0-4cf4-bdf0-7f9dd845f7b0 (mRNA) 1269 residues [BFAB_07:324415-327314 - strand] [cds] name=Bfab07g00890.1
ATGCCGTCGCTTTCTGCACTAGCTCCTCTCGCGGGCATTGTTGCCAGTATTCCTTCTGTT
ATGGCGGGCTTTGATCCGACCTCCCAGAGTAATGTTGCGGTTTATTGGGGACAAAACTCA
TACGGACAGGGCTCTGGAGCTTACGTTCAGCAACGGCTTTCATATTATTGCCAAAATACG
GAAATCAACATCATTCCACTCGCTTTCTTAAGTTCTATCAATACCCCAACACTCAACTTT
GCCAATCAGGGAGACCCATGCACGGTAATCTCAGGATCTACATTATTTTACTGCTCAGAG
CTTGAAGCCGATATTACAACGTGTCAAAAAACATATGGCAAGACAATTATGCTATCAGTT
GGCGGGGCCACATATACCGAGGGCGGCTTTACATCAACACAAGCTGCTACAAGCGCTGCA
AATAACCTTTGGTCATGGTTCGGACCTGATACTTCAGGCGATATCCGACCTTTCGGAACT
GCTGTGATAGATGGTTTTGATTTTGACTTCGAAAGCACGGTATCCAACATGCCTACATTT
GCAAATCAGCTCCGCTCGTTGATGGATACAGATACAACCAAAACATGGCTTCTATCCGCT
GCTCCACAGTGTCCTTACCCTGATGCCGCAGATGGGCCCATGCTTGATGGAACAGTAGCG
TTCGATATCGTCTGGGTGCAATTCTACAACAATTACTGTGGCGTGCAATCATTCGTCCCC
AGTGCATCAATACAAAACAACTTCAATTTTGACACTTGGGACAACTGGGCCAAGACAGTA
TCACTAAACCCTAATGTCAAGGTTATGCTGGGCATACCATCCAACACTGGAGCTGGAGCC
GGGTACACTTCTGGGGCTGCCCTTGCAAGCGTCATCGCATACTCAAAGAGTTTCTCCAGT
TTTGGAGGCATAATGATGTGGGATATGAGTCAACTTTACGCAAATGCCGGATTTCTCGAT
GCAGTCAATGCGGATCTTGGAAAGCCAGCGGTAACGGTACCAGTAACAACAACCACCGTT
ACTAGAACTGTTACTAGCACCACTACTACCACCACTACTTCGACTACCACCTCCGCTACT
ACAACGTCTCCAGGCTCTACCCTCACGACCATAACAACAACTAGTGCCAGCCCTACTTCG
ACTGGCGGTTCACTTGTTAATGAGTGGAACCAATGTGGTGGACAGGGCTGGAATGGAGGT
ACTGTTTGCGTTGCTGGCACAAGTTGCGTCGCATATAGCATCTGGTATTCACAGTGCAAT
CCCAATTAA
>744db7ce-d1f9-4820-ac6a-7afecc73028f (mRNA) 792 residues [BFAB_07:332891-334325 - strand] [cds] name=Bfab07g00900.1
ATGGACAAGCAAGTCCCACAAACTATAAGTGGTACAGAAAAGAAGCTGATTGCCACTTCA
CAGGCACATTCCAATGTCGGAGATTTCGAGAAGCGTGCCCAGATTTGTGATCCTAAGCTC
ACATTCGACGGAATAAGACAGTGTGAACAAGTTAGAACTGTTCTGAACTCAAATCGCAAC
ATTCGGCAGATCTTTTGTTCTCCGATGACCCGCGCTATCGAAACCACCTTAATTACGTTC
AGAGATGTAATGAAATTCTCGATGGAAAATTCAGACATCCAAACTACGGCCTGGGATGCA
CTTCGTGAATGGGGCTCTATCCCTTGTTGTACAGGCAGTTCAATAGCCAAGCTACAAGAA
GAGTTTGGCCACAAAATGGACGTCAGTCTCATCAAGCCTGGTTGGGAGCACAACAAAGAG
ATTTTCGGCGATATATCTCGGGCTGATAAGGTCAAGCAATCGCTCTTCAAAATCGCTAAG
AACGTGCAAGAATTGACACGTCTTGGCGTGATATATGATATCAGAGACGGTAGCTTCTCG
ATACGTGGCCAATATTATGCGCCATACGAGATTGTAATTGTGTCACATGGTGGATTTTTG
GAAACGATGTTGGAAGCAGAATTGGGTGGCAAAGCCTCTAAATTTCCTTTTAGAAATTGT
TTCCACAATGCGAACTTGAAGTCTTTCTCTTTCGAAACCATCAATGGTCCCGGCGGCGTT
CGATACGGATTGGTCGAAACAAAAGAGAGCAAGATGAGGAAATATTCTCGTAACCCGATA
CCCCTAGGCTAA
>1fdb4ec4-c0a0-4a95-b110-194ead14c694 (mRNA) 960 residues [BFAB_07:335644-337286 - strand] [cds] name=Bfab07g00910.1
ATGTCTGCGAAACAATTTCCCTCGTCCATGTTTCCATTGAAGAACATGGAAGGCAACTCT
GTTCAGATCCAAGCAGAGTATGCCGACCGCGACCCAGACAACAACAGAATTCAGACTGCT
TCTCTCAAGATCAACTTACAAACCCTCAAGGTCAGCAATGGCTCCCCAGCCAAATCAGGA
AATAATAATCTGAATGATGATGTCGACATGTCAGGCCTCGATCATCCCGTTGGCGGAATC
ATAAACAATTTGAAAAATCGCAGATCGAGGCATAAATCACACTCATCTATCAACACCGGT
CAGATTCATCAGCAAGCTCAGATGGCACGCATGTTACAACCCGCGATCCGAGCACTTCAA
TCTGCCACTGACAAAGCTATCAACAAAAGCAAAAAGATCTCAAGCCAAGGTGAAGCCTTC
ATAGGACCAATTTTGCCAAGTAATGTAAAGAAATTGCGACGTAACCTTGAAAGCGATTCT
TCCAGAGTGAGAAAGGAGAATTCCACAGAAAAGAAACGCAAACGAAAGGAAAAGCGCAAC
ACTGTTGTCAACGCACCCAATACAAAGCCGAAGAAAGAAAAGAAGAAGAAGGACCAGGCT
GTTAACGCTAAAGCCAAGCCGTCGGAAGGTGCTATCAAGAAGCGTAGGACCAGAAAGTCG
AAGGAGGGGAAAATGGACCACATGGAATATCTGATGGAACGTCGCAAGCTTGGGGATACG
AAAGCGCTTGTGCTTGCCGATAAGACTGCTAGATCAAACGCGGACGAGAAGGTGGATCTC
TACGGTCGTGGACTAAACCCCGCAGATTGGGAGGCAACGTATCAACAGGAATACCAGGCC
CGTACTGAAAGGCTTAGAGAAAGACAAGCTAGGGATGAGCAAGCGTTGATGTCGGCGTTG
AGCGGTCTCTCTCTTGTTGGAACAAGAATTGGCGGTGATGATTATGATCTAATTCTCTAA
>1741806a-cfcb-469c-9184-7deb41e15b08 (mRNA) 624 residues [BFAB_07:337922-339461 + strand] [cds] name=Bfab07g00920.1
ATGAGCAAAATTCAACACATTTTCATGACCGGAGCCACTGGCTACATCGGATCTGTCATA
ACTGAACTTGCCATTGCAGAAGGCTACACAGTCCATGGACTTTCTCGATCTGAATCTGGA
GATGCCAAGTTGCTCAAAGCCGGCGCCGTGCCGATTCGAGGCAATCTTACTAACCTCGAT
GTTCTCCGTCGCGAAAGTGCCGATGCAGATATTGTCCTCCATCTTGCGACTGATTATCAT
ATTACCAAAGCCAACGCTAGCTATGATGCCGCGTGGCCAATTAACAAGGCGGCAGTTGAA
GCTATCGCAGATGGATTGGAGGGTTCCAATAAGCCACTTGTTGTGACCGGTGGTACATTA
TTTGTCTCGCCAAATCCAGATGGTGGAGAGACTACGGAAACTTCTCCGGTAGATCCAGAA
CCTATCAATAATCGTCATCAAGCTGAAGCTCATGCTCTCGAGCTGGCAAAGAGGGGAATC
AGAGTTATCGCGATACGATTGGCACCATTGGGTTTTTGGGAGAGGGGGCAGTGGAGTCAA
GCTATTCACGGGTATCTCCAAGCATGCTGGCGAAGTGATGTGTGTAGATGGAGGCAAGAA
TCTCACGACCACTGTTCATATTGA
>5c2139c1-6e59-4a02-a3af-1c166349146d (mRNA) 1839 residues [BFAB_07:341954-344370 + strand] [cds] name=Bfab07g00930.1
ATGTCTTCCGACGGGGACAGAGAAGACCAGGGTGAAGTGTCAAGCCCTCTTGACTCAAAT
ACTATCGATGGTCAAGAGGTTAAAATTAAGGAAGAGCCTTTCGAGGAAGATACTAGGGTC
AATCAAGATATTCCTCTTTACGATCCAGCTTTTCGTCCAGATCTCGAGAGCCAAGCTATG
CCGTCTCGTTCCGAATCACCAGCTCTTTCAATTCGACTACGAAGACCTGGAAGAGCTTCA
TCTGAGATGCATGCATTCACGACAGCTGGTGTAGCCGCTTTGACGAACAATCGGCTTTTG
CAAGCACGTCTCAACAAGTTAATGTCCATGCCGCACTCAGAAGATGAATTCCCTGATGAT
AAGCTAGCTCAAACTTCAGAGTCTCAATTCGATTCACAGGTCCACAATGCCGGTTATAGT
CAGCCCAATCCTGCTTATCCAGCAACCTTTTACCAGCAATATGAGTCTCAACAACACCCA
GCTCAATTATCAGGTTATCTTCAAGATCCATTTTTGCCAGAGTACTCCAATCAGTTTCAC
GGTTCCTTCGATCGAAAATTTCCACAATCTCCCTATGTCGAGGATCTAGATCAGACCATC
GTAGTCGACTCGACCATGTCCAACTCCTCGGTTCCTCCCGAAGACTTCTCCGCCAGTCCA
ACCCCTACTCCGCAAGAAGAAGTTTTCCTTGAGAATCGAGCACCCTCTACACCTCGTGCA
GGTCGTCAAGCAAAACGCGAGTCTGCCAAGTCTAGAGCCCATGGAACTCGTACTGCTGGT
CGAAGACTTCGTGCCCGACGTGCAGAAGATTTTGCTCCTCCCCCTGGTGCGATGACTGCT
GCCGACGTTATGGCTGTTCACGAAAACAACATTCGTCGTAGAAACAAGCGATACAAGAAG
GCTGGCATCAAGCCCCCAGTCCTCGACGATATCGAACAGGACGTTGTTGACACACTGAAC
GAACTTGGTGTCCCGATTGACTACAACGACATGTATCTCCAACAGGTCTATTCGAATAGA
GATACGACGCTCGATGGAAGTTTGGACGAGTCTGCAGACAGCACCATAGATACTATGGAT
ACCGATGAAACAATAGTACCACTTCCTCCTAGTCTTCCTGCGGAACCTGATTTTCCAACA
AGCGCACGCTGGCGAGAACGTGGGCCAAATGGTCAGGCAAGAGCGAGATGGGGATCTGCT
CGATTGCGGGCAAAGAAAAAGGTCCAAAAAACGGAAGCTTGGAAAGAAGCGACTAAAGAT
GAAAGAGACGCAATGGAAGCAGCAGCAGCAGATGCTCTCGTATTCATTGCAGACCCCATT
CCAGTCGGCCCCGTACCACCAGGATCTCATGCACCATGGTTACGATCAGAGAGAGCCTTT
CTTCTACAAGAAGTGACCGAAAACAGCAAAAGGATCAATTCTACGGGCAACAGATTGGCC
GCAGTGGCCGAGACCTACAATCGTCGCATGCAATACAAAACCCAAAAAGCAGGCGAGCTT
TGCATTGCTCCTGGCAACGGTGAATCTCGAAAGAATTCGCGGTTAACAAAAGACCGCACT
CCACCACACAGAACAGATGTCGCCATCATGTCGAGCATCAAAAAGTGGTCGGAGTTGGGC
GATATCTGTATATGCCGACAGCATCAGCGGTATCCTGTCGGTGATTTTGAACGAAGTGGA
GATTTTCCCCATGGTCACGGGGTTAAAGAATGCATACCTAAAGATCGTAAGGATGATGCT
TGCCATTGCGATGATCACCTTAGGGATTTTAATGGAGAGTTCCCGCCAGGACATACAAAA
GCACGATGCAGTCACCTTCTCATTCGATCGCACAAGTGA
>82253d53-5f9e-46f6-b604-5178b0d10833 (mRNA) 2736 residues [BFAB_07:349092-353458 + strand] [cds] name=Bfab07g00940.1
ATGGCAAAATCTCCATCCGATGCCGAGACTGGCACATTGTCGAATCAAGAAGTTCTTCGC
AGGATGAGTTTGGCTCCTGGTCGCGAGAGACAAAACTCCTTATCGGACCTTGATCCGCGC
GCGGCGCATCCTTCATTAAATTTGACGGGAGGAATCATCTCTGCGACATTTTGCATACAG
CAATCTTTGATGTACAGAAAAGGCTCCGATTGGACATGGTCGCAAAGACATGGCGGTTCT
TCGCAATTCGACTCTTTCAGATACCTTGCATCGGAGAAATCGCCCTGGCATCATACATTA
GTTGGCTGGACTGGCGAAATCAACCCGGTGGAGGATCTTACCCCTCCAGATACCCCTCCT
CTTGGAGGCCATCCTATACAATCGCAACCTCCACAAAATAGGGTTCCTTTCAATAAGAGC
TCTGCGCCAATTCCAGTTGATGGTGTTACCATGCCTCCAACACCACCAGAGACCGATGGA
TTATTTGTTACAAGTGACGATAGGCAACGACTGGAAAGACAACTCGCACATCAACCACAT
GGAAAGATCGTCCCAGTTTGGCTATGTGATGATGCAGATACGAGTGAGGACGGAAGTGTT
TGTTTGAAAGACCAATCAAGATGGAGAAGATTCGCCGAACACGAGTTATATACTCTATTT
CATTACAAACAACACGAACCTACGAATGGTCGACAAGAACGACAATCATGGGCGGATTAT
TATCGAATGAATCAGAAATTCGCAAACCGAATTCTCGAAATTTATAAACCTGGCGACATT
GTCATGGTTCACGATTATCATCTTTTGCTTCTTCCCAGCATGTTAAGACAACGGGTTCCA
CATATGAGCATTGTCTTCTATCTACATATCCCATTTCCCAGTAGCGAGTTCCTTCGCTGT
TTACCAAGAAGAAAGGAGATATTGGAGGGCGTACTGAGCGCAAATTTGGTCGGACTACAA
TCATTCAGTTACACGCGACACTTTAATTCTTGCTGTACAAGAATTTTGGGATTCCCATCT
ACGAGCGCGGGTGTCGAAGCGTATGGTGCGAGATGTGATGTAGCGGCTTTCCCCATTGGA
ATCGATGCGCGAAACGTTGAGCAGCTCGCTTTTAATGATCCTGCTGTTGATGAGAAGGTT
GCTGCATTGAAGAAGTTGTATGCGGGCAAAAAAATCATTGTCGGTCGAGATCGTCTTGAT
AGTGTTCGAGGTGTGGCACAAAAGCTCATGGCCTTTGAACGCTTCTTGGAAAACTTTCCA
GAATGGCGTGAGAAGGTTGTTTTGGTACAAGTCACCAGTCCAACTAGTGTTGAAGAAGAG
AGAGAGGATTCAGGAAATAAGATTGCAGCCAATGTTGCCGAACTGGTTGCGAAAATCAAT
GGTCTCTACGGATCTTTGAGTTTCTCGCCCGTCCAACACTATCCTCAATATCTCTCTCAA
GAAGAGTATCTCGCTCTTCTTCGTGTGGCAGATGTTGGTTTGATCACTAGTGTACGTGAT
GGTATGAACACAACAAGTTTGGAGTATGTGGTTTGTCAAAGAGAGAATCATGGTCCTTTG
ATTATCTCTGAATTTTCTGGATCGGCCGCAGTCTTGGATGCAGCCATTCACATCAATCCG
TGGGATTTCAATACTGTTGCCGAAAATATTCGACTTGGATTGGAAATGCCTCCTTCCAAG
AAAGCAGAGCTTCACGACAAGTTATCCGAATATATCTTCAGTAATGATATCACAACCTGG
ACCAAGAGCTTCATTCGAACATTAATCACAAAAATTGGCTCCAATAGTCATGCTTTCGCA
ACACCCCTCTTGGATAAGACTTCTCTGTTGCTTCAATACAGAGCCGCCAAGAAGAGATTG
TTCATGTTCGATTATGATGGTACTCTTACCCCTATCGTTAGAGATCCTGCTGCAGCTTTA
CCTTCTGATAAATTATACCGAACCCTGAAAGCACTTGCTTCCGATCCCAAGAACGCCATT
TGGATTATTAGTGGTAGAGATCAAGAATTCTTGGGACAACATCTGGGACATATTCCAGAA
TTAGGATTCAGTGCTGAACATGGTAGTTTTATGCGTCATCCAGGTAGTCAAGAATGGGAA
AACCTTGCGGAACAATTCGATATGGGTTGGCAAAAGGAAGTTATGGAATGTTTCCAGAAA
TATACTGAGAAAACTCCAGGGTCCTTCATTGAGCGCAAGCGTTGCGCTTTAACGTGGCAT
TACCGTCCTTCAAACCCAGAACTGGGTGAACGCATGTCTCGTGAATGTCAAAAAGAACTC
ATGGCCACCGTTGGTAAAGCTTGGGACGTCGAAGTCATGACCGGTAAAGCAAATCTCGAA
GTTCGTCCTACTTTCATCAACAAAGGATCAATCGCCAAACGTCTTGTTGATGCTTATGGT
AAAGAAGTCGGACAAGCTCCCGAATTCACATTTTGTGCAGGTGATGATACGACAGATGAA
GATATGTTTAGATCTTTAAACAACAGTGAATTGAATGTAAATCACGTTTTCACCGTTACT
GTGGGCGCATCAAGTAAACCGACATTGGCTCAATGGCATCTTCTGGAACCGATGGACGTT
ATCAGTAGTATTGCACTCCTTGGGGGAGGTGATACGAACGTAGCGGACCTGGGACCGGTT
AGTGTTATTGAGGGGAAATCCCGGGAGGATATGATGGGAAAGATTGAGGCATTGGATATG
ATTCCTGGGGCATCTAGTACAGGTGAGGGAAGATAG
>3e67fd56-998e-4a26-a2d5-f8aa2b6107f6 (mRNA) 927 residues [BFAB_07:355394-357037 - strand] [cds] name=Bfab07g00950.1
ATGTCTCAAGAAATCGACATTGACCCCAATGCATACACCCTCCCATTCAGCCTAACAAAG
ACCATCCGTCGGGACCCCTATCCCGCCATCCTCCCATCCAACCCAAGTAATTCTCAAGCT
GGAAAAATAATCCTCATCACAGGCGGCGGCACGGGAATCGGTTCCTCTGCGGCCCGCGTC
TGGGCCCACGCATCCGCGCTCGGCATAATAATACTCGGACGCCGCATCGAGCCACTCGAA
GAAACGGCTCTCCAAATCCGAGCCATCAACGCCGAAACCAAAGTGCTAGTTATAAAAACC
GATGTGAGCATTGATGATGAAGTGAAACATGTATTTCAGCAGACCCATAAAGTGTTTGGG
AGAGGTCCGGATGTAGTTTTGCTTTGTGCGGCCGTATTGGAGCCGTCGAGATTGGTGCAT
GAGATGGGGGCGGACGAGTGGTGGGGTTATATGGCTATCAACTCTAAAGGCGTATACTCC
TGCATACACCACTACATAAACACGCAATCCAACCCCGCCCACCCCACCGGAACAATCGTA
GTAATGAACAGCGCATCGACCTCCATCCTCGACATCCAACACCCCGCCAACGGAATCGGA
AAACTAAGCGCACAGCGCCTCGTCGAATTTGTAGACGCCTCGTATCCCACTCTCCGCATA
TTCTCTCTCCTCCCAGGACTCGTCGCCACGCCCAGTCAACAGCCGCAAAATCTTCCGTAT
GCGCGCGACGATCCCGTAATGAGCGGGATGTTGACGCTGTATTTGAGTCAGGCGAGAGCG
GATTACTTGAGAGGCAGTACCATGTCTGTGAATTGGGATGTAGAGGAACTAGAACAGTTT
CAAAAGGAGATCAGAGAGAAGAATTTGTTGAAGTTGAGTTGGATACCTATTTTGCCCATT
GGTGGGGGGAAGGGTCTTGCGATGTGA
>c922dbf9-b65a-4444-b354-bef0e530b8d4 (mRNA) 1047 residues [BFAB_07:357887-359719 - strand] [cds] name=Bfab07g00960.1
ATGGAAGGGAAAAATGCGCTGCTCGGCACACCAGTGGCATTCACCATTTTGGCCGTCATT
GCTGTTGCCATTCGCTTTTGGGTGCGCATTACACATAATGCTGGGTTAGGATGGGACGAT
TGGCTTATGCTTATAGCTATGGTAGACCAGATTGTCGCCCGTGTTTTAACCACCATCTCG
ATAGCGTATCAATTTCGCAACCCCCCCAGCTTTCAAGACCAGGTTAATGCGTTGAAATAT
AATTACATCGCGGGCCCACCTCAATTGACAGTCTCTGTCATCGCAAGACTGTCGGTCACC
ATCTTCTTGATTCGCTTATTTGGTGTACATCTTTGGTTGAAGAGATATTTGATCGTCTTG
ATGACGATTTTGAGTCTGCTTACAGCGGGTGTGATCATTATCTCTTTCGCCCAAATAACT
CCGGTTCAAGCTATTTGGAACCCGATGGTACCTGTGACAAAACAATGGAATCCAGATCTT
TGGCTGTATTTTGCTGTCTTCAATCAAACTACTTCGACACTTTCTGATATAACCTTTGTC
TTGTTCCCGGCTTTTATTATTTGGCATTTAAATATGCCACGACGCCAAAAATTCGGTCTC
ATCTTTCTCTTGGCACTATCACTCTTCGTCATGATCATGTCAATCTTGAAAACCGTCTGG
GTAGTCGATTCATACCACGGCAGCAAGACTCTTGAGCATTACAACCAAACCGCGATTCTG
ACACTCGGTCTCTTGGAAGGAGACATGGTCATCATCATGGGATGCATCCCGACATTCGGG
CGCTCCGTCATCGACGCTAAATTCTCTCTGCTATGTCCGACCATTTTAATTTATTTCGGC
AAATTCAGATCTACGAGAGATGCATCTACAGATAAAGACAAGTCCGATAGATCATACCGC
ACTTCTTCTAATCCGTATGAGAATTTGGAGTTGAGCTCAAGGAGGTTACCTCTCAATTCA
GATCATAGTCTTGGAAACACAAAGTCGGCGGAGACACGCACGAAGGATATAAGTCAAGAT
AGATTGGTGAGGGAATATGAAGTATAG
>c9310b51-c711-440d-894f-7568a6645869 (mRNA) 1599 residues [BFAB_07:360206-362618 - strand] [cds] name=Bfab07g00970.1
ATGACAATAGCAATTATGTCTTGGACAATGGGCACTCAATTACTTCTATTAGTTTTGTTG
ATTACAGTTATCACACTCTCACGGCTTCTTTTTCACACATTCTTCCAAAACAAGGACGAA
GTTGATGTATGGAGCAAAGTTGAACCCATTGGTGTCTCATCCGGCGGCATTTTCTCATGG
ACTCGTGCTGTAATCGGATCCGCATTCTCCTATCAGCAGAACACGCAAGATGGGTACGAC
AAGTTTTGCAAAGCTCAAAATCGGCCATTCATTCTCCCTACTATGTGGACAGGAGGCTCT
GTAGTTGTGCTTCCACCATCGTTACTACATCTAACCCAGAAGGTCTATCCTTCGATGGCT
CGCCATCAAGCCAAAATGGATCACCTCCAGCTACCTTATATGATTTCCGACCACGATGTG
ATAGACAATCTCATCCAATTTGATATTGCTCGCAAGAAGCTTAGACAAGCAGAAGTAGTC
AGCTCCCTCGCTGCCATAACAGAAGAAGAAATTGACGTAGCATTCCGCAAATATTGGGGA
ACCTCTGAAACGTGGACGAGCATAAATGCTTGGGACAATTGCACACGAGTTATCACGCAG
GCCGGATTCCGCATTCTCATCGGATTACCTCTTTGCCGGGATGAATCCTTGTTGGAGAAC
GCAAGGATGTATGCGAATTATCTCTTTAAAGGAACATCTATCATCAACTGTCTGCCCCCC
TGTTCCAGGCCAGTGCTAGCGAGAATCATATCATGGCCATCAAAGTACTACCAGGCACGT
TGCCGAAGAATACTTAGGCCGTTGATCGAGCAGAGGATCCGTGGATTCCAAGATCACAAG
GCAGGGTCCGAAAAACCGGATGATTTTCTCCAATGGTTAATTGAACATTGCAGTAAATTA
GACGCAAAAGAAATGGAACCCGACAAGATTTCTGACCGAATTCTCGTCTTGTGCATTGCA
TTTGTCTTTGCAATGGGTTACATTTTCTGTAGTTCTGTGCTTGATCTCTACAAGAGTTCA
GAGAAGACCTCATTTGTCGCTGGATTGGTTGCTGAATGCAAATGTGTATCCGCAGAGCAT
GGAGGCTTGTCGACAAAACAAGCAGTTGACAGCCTATTTCGTGTCGATTCCGCGTTACGC
GAGTCCATGCGCGTTTCTGATGTTGGGGCCACCAGCATTCCAATAGATATCGTCTCAGGC
AAAGTCGACCTCGGTAACGGAATTCAGATCCCTTCAGGCATGCGAATGGTTTTTGCTACA
CAGCCAATGCACCTCGATCCCGACTCCTACCCAAATCCTCTGCGATATGACGCTTTCCGC
TTCTCGCGAAAGTATGAGGAAATAGAGAAATGCGAGCAAGAGCTTGGCGAGCGAGAACTT
TGCACCACTATCACCGAATCCTTCCTGCCCTTTGGATATGGGAAATTTCAATGCCCTGGA
CGCTGGTTCGCCACCCAGACAATCAAGCAAGCTCTTGCTTATGTTGCCATGAACTATGAT
ATTGAGTTTGATGGCAGGCAGTATAAGAGACAAGCTTTGCTGAACATGATGCTACCGCCT
GAATATGTGGAAATGAGTGTTCGTCGTCGAAGGGCATGA
>d3d8b4f0-79fc-4860-a793-91c714a277fd (mRNA) 1725 residues [BFAB_07:363042-365731 - strand] [cds] name=Bfab07g00980.1
ATGGAGAACACTGCGACAAAATCCTCATCTCCAGAAGATGACGAGAAGACAGTTGAACGA
AACCCTAGCTCCAGCGATTCCAAAATCGATGGCTCTAGACTGAGGTTAGAGACTAAACCA
GTTGACGAGGTTGAATACCAGGTGGAATATGTATCCGGAGTGAAGTTAGCAATTATTATT
GCAAGCGTCGCATTTTCCTGTTTTCTTGTTCTAGTAGATAATATGATCGTTAGTACGGCT
ATTCCGCGTATAACTAATCAGTTCAAATCTCTCAGAGATGTTGGATGGTACGCCAGTGCA
TATCAGTTTGGAAGTGCAGCTCCACAGCCTTTGACAGGCAAAATTTACACCCATTTCAAG
ACGAAGTGGGTCTTTCTGACCTTCTTCTCAATCTTCGAGCTAGGATCGCTTTTATGTGGT
GTGGCCAATTCTTCTGTTATGTTGATATGCGGCAGAGCCGTCGCTGGTTTGGGCGCTGCC
GGCATTCTAAGTGGTGCTCTTACTATAATTTCTAGCTGCGCAGCGCCAGAGAAACGCGCA
AATCTAATTGGGATAACTCTAGGCCTCAACCAACTCGGACTTGTCGTAGGACCGTTACTC
GGTGGCGTATTCACAACGTTTACTACATGGCGCTGGTGCTTTTATATCAATCTGCCACTC
GGAGCTGTTTCGTCGATTGCCATTATCTTACTTCGCATTCCCGAGCAAACGCGCAAAGCA
CCGATTCGAACTATTCTTCCTAAGCTACATCACTATCTCGACTTGATCGGATTTTGTCTC
TTTGCACCAGCCATAGTGATGCTTCTTCTCGCACTTCAATATGGAGGGAATCAATTTGCA
TGGAACTCTTCACAAGTCATCGGGCTATTCTGCGGCTTTGCAGCAACTATTGTTGTTTGG
TATTGGTGGAACAGTCGGCTTGGTGACAAAGCTATGCTCCCGCTTTCATTGGTTACCAAA
CGGGTTGTCGCGATGGCTGTTCTCTATCAGGCCTTCATGATGGCCTGTCTTTACGGAGCG
ATCTATTTTCTTCCCATCTATTTCCAGGCTATCTTGAATACCAATGCCATGCTCAGCGGT
GTATACTTGCTGCCAACAATCCTTCCGCAGCTATTTATGGCCGGACTTTCGGGTCCAATG
ATAATGAAAGTGGGATATCTGATCCCTTTCGCGATCTTCTCGACGGTTCTGATGTCTATT
GGCGCTGGCTTGTATTCGAAACTAGGTCCTAATAGTTCAAGTGGAAAATGGGCTGGATTT
CAAGTCCTTTCTGGAATTGGCTCAGGCGCTGGTCTTCAAGTGACCATCATTGCAATACAA
GCAGCAACAACAGGAGAAGAGCTTTCATCTGCAATGGCCTTCCTTATCTTTGGACAAACA
TTAGGCCCTGCTATCGTCCTGGTTATATGCAACGTAATCTTTGATAACGCTCTTGAATCA
CAACTTCCCCAGCATGCACCACACATCAACGCTACTGCCATTATCGACGCTGGAGCTACA
GGATTCCGAGCCTTTGTTGATGAAGCTGATCTTCCTGGTGTTTTACTGGCATACTCTAAT
AGTATAGATCGCGCTTTCTACTTAGTGGCTGCTATGGGCGTAATGTGTGGGTTCGTTCTT
TGGGGATTGGGTTGGCAAAATGTGAGCATAAAAGCAACGGATGAACAGAATGGACAGGAT
GAAAAAGTAAAAGAAAGCACAGAGAATGGAATCACAAAGGCGTAG
>f6e894f0-da91-49be-aac5-b9f752eaa38f (mRNA) 1149 residues [BFAB_07:366796-368755 + strand] [cds] name=Bfab07g00990.1
ATGGAAGCTATCTTTGGCCAAATCAGACAAATCGCCAATAAACTTGGTGACACGGCGAAG
TCATCCTTAATCCGTGATCTTCATACTTTAGCACATTCGCTAGAAAGCGTGGATGACACT
GTGAAAAGAATAAGCCACTTGCATGAAGAAGCCGCGGTGATTCGCGTCGGTATCGATCTC
AAACTATTTGATATACTGGAGGCTCGCAGAGCTCCACTCAGTCTTGATGAAATTGTCAAA
ACTACTGGTGGTGATAGCCAACTCATTGGGAGGTTGATGCGATTTTTAGCTTCAGTCGCT
GTAATCGAAGAAACTGGTAAAGATTTTTTTTCTGCTACTAATGTAACCAAGAATTTGGTG
GTTGAAGGGAGTCAAGCTGGTGTTTGCCACGGGTTTGAGACTTCAGGACCAATGTATCAA
ATGCTACCAGAGTTCCTGAAGAAAACGAATTATCAAAACCCAAAAGACCCTTTTCATACG
GTTTTTCAAGATGCATTTAACTTTCCCGGGTCAGCTTTTGAATGGTTTGGCCAGAATCCC
AAAAACCTTAGATACTACCAAGAGTATATGGCTGGTCGTCGTCAAAGTGTACAGGAGATG
TGGATGTCAGTTTATCCAATAGAATCCGAGACAAAAGAGCTTGATCCGAAGGCTCCCTTA
CTTGTTGACATAGGTGGAAATATTGGCCATAACTGCGTACACTTCAAGACAATGTTTCCT
AATATTCCTGGTAGAATCATTCTTCAAGATCTGCCAGAGAACATAAAGGCCGCTCTTTCA
ACGCCGGGAATCGAACCAATGGTTTACGATTTCTTCAAACCACAACCTATCAAAGGTGCA
AAGTATTACTATTTGGCTCATGTTCTTCATGATTGGCCAGATGATAAGTGCCGCGAGATT
CTTCAGAATACGAAAGCAGGTATGGGTGAAAATTCGGTCATTCTCATTGATGAAATGATT
CTGCCAGATACAGGGGTCTCTATGAATGTGACTACGATTGATCTCGAAATGATGTGTGCA
CATGCATCTCAGGAAAGAACACAGTCGCAGTGGGATAATCTCCTCACTACAGTGGGACTC
AAGAGAATTGAAACTTGGGTTTATAATGCTCCTGTATATGAGAGTGTGATGAAAGTTGTT
CAAGCTTAG
>9cd9311f-6a81-4ce2-944f-9dee17a4f9a4 (mRNA) 921 residues [BFAB_07:368751-370344 - strand] [cds] name=Bfab07g01000.1
ATGGCTCCACGTCTTGCATTTATCGGTATGGGTTTGATGGGCCAGGGTATCACAAAGAAT
CTGGTCGAAAAGGGAGAATTTGAAAAACCTCTAATTCTCTACAATCGAACACGAAGCCGC
GCCGAAGAGCAAAGCGCACGTATTGGACACTCAATAGTGTCCAGTTCTTTGTCTGAGGTC
GTCTCAAAAGCCGACATTATCTGGTCATGTATTCAAAACGAGGAGGCCGTAACAGAAATG
TTCAAGTCCCTCTCCAGTTTTGATATCCGTGGGAAATTGTTCGTGGAAAGCTCAACGATC
CCGGCTGAGACCGCAGATAGTCTCTCGAAGCAAATCTTGGATGCTGGTGCCGAGTTTGTT
TCTATGCCTGTTTTTGGTGAGCCTAGTCTAGCATATGCTGGGAATCTAGTTTGCGTTCCG
GCAGGCCCTCGGGAGTCGGTTGCCCGTATAAAACCTCACCTTGTGGGCGTAGTAGCAAAA
GCAATTATCGACCTCAGTGGGGAGAGTCCCGGTAAAGCTGCTCTATTAAAGATGATAGGA
AATGTTCTAATCGTGTCGACAATGGAGACTGTGGCTGAAGTGAGCGTACTTGCAGCGAAA
ACTGGAATAGGTAACTCCCATATCCAAGAGTTGATCTCGAACTATTATAAAGTCGGTCCC
ACAATATACGCGAAGAAAATGCATGCAGGTGATTACTACAAACATGAGCCAATGGTCGAG
ACTTCCAAAGCTATCGATCTTAGTTCAAAAGTTCTTGAGCTAGCGGCATCCGTCGGAGTG
CCGCTAAAAGGGTATGAAGTTGGAATCGAGCATATGGTTGCTGCAAGAGACTATGCCGGT
CCAAAAGCTGATATTCTCAGCATTTATGGAGCTGTCAGAATGGAGAGCAACTTAAAATTT
CAGAACAGTGATGAGAAATAG
>578e2d67-5b1c-441b-bd0f-72734fc244dd (mRNA) 2799 residues [BFAB_07:371065-374597 + strand] [cds] name=Bfab07g01010.1
ATGGCCCCAGCCAACATAATAAGCATTCTGAGGCTCTGCGCTAGCAGAGACGACGGGCAC
GGTATCGTCACTTATCCACTGGGGAGCAGAAACAGTGTGAAGACTTTATATAAAGATTTA
GAGTTCCAAGTGATCCACAACGCAAGACTCCTGTCACGCATCTCCAACTTCAGACCAAGA
TCAATCGTTTTACTTCATTTCACGGATCACCTTGATAACATCGTATGGTTTTGGTCCGTA
ATTGCTGCTGAAGGCATTCCTGCACTATCAACACCATTCAGCAATGTTGAAACCCAGCGC
CTGAAACATATTGCACATTTACACAATCTCTTGAAGGCTCCCCTCTGCATAACGAGACGT
TCCTTGTTAGATCAGTTCTCGGATCAGGATATACTGAAACCATACATTATCGAAGACATC
TTCTCCGCTCAAGTCGCCTTAGAAAATGATACTATAGACGAACTTGGTCGAGTTGCAAGA
GAAGAGTATCCAGAAGACTTAGCTATATTAATGCTTACCTCTGGCAGCACGGGAAACGCA
AAAGCCGTCTGCTTGACTCATGGCCAAATTTTTGCCTCAATGGCTGGAAAGTCTTCAGTT
CGGAAGGATATCCCCAAGGATTTCTCTGCCCTGAACTGGATAGGCTTTGACCATGTCGCC
AACTTGACAGAGATACACCTTGAAGCCATGTACCTTAATATAGACCAAGTTCACGTACAG
GCTCCAGATGTCATTTCTAACCCTCTGTTTTTACTGGAACTCATACACAAGCATCGTGTG
GGATGGACATTTGCACCAAACTTTTTCTTGGGAAAATTGAGAAAACAGCTAGACACAGTT
GTTGTGGACACTAGTCTCTACCTAGACTTAAGCTGTCTCCGTCTTTTGGTTTCCGGTGGC
GAGGCAAATGTCGTGGAGACATGTGATGTTCTTTCCCGCCATCTAGAAAAATACGGAGCA
CCATCAAATGTGATCTCTGCAGCCTTTGGTATGACAGAAACCTGCGCTGGGTCTATCTAT
AATCTCGATTGCCCTGGATACGATGTTCATAATATGCAGCAGTTCTGTTCTCTTGGGCGT
TGCGTACCGGGAATAGAGATGCGGGTTACAATCCCTCAGGCTGGCGATGAAATTGTCCGG
GCTTCAGCCAATGAACTTGGCCTTCTTGAGCTTCATGGACCTATCGTGTTCAAGTCCTAT
TTCAATAATAAGTCCGCCACAACAGCTTCCTTCACTCCAGATGGCTGGTTTAGAACAGGA
GATCACGCCACGATCGATCGAGCTGGAATGCTCCATCTGGCAGGGAGGACAAACGATACC
ATGAACATCAATGGCGTTAAGTATCTCCCGAACGAGCTAGAGGCTGCTATCGAAGAGGTT
GGAATTGAGGGTGTGACACCGAGTTACACAATATGTTTTTCCTTTCGTCCACTTGGTGCG
GAATCAGAGCAAATCGAAGTTGTTTACTTGCCCTCCTTTGGACCCCAAAATGTCGATGCT
CGAATTGCAGCTCGTGACGCCATTATTCAAGTCACAATGTTGCAAACTGGCTCTCGACCT
TCAGTTCTGCCATTGAACGATGCTTTGCTGCAGAAAACGACACTCGGAAAACTCTCTCGC
GCCAAAATCAGAGCTGCATTTGAACGTGGTGACTATAAGAAATGCCTGGAGTTCGATAAG
ATGCAGATCGAAATATATAACTCATCCCATATGCAACAACCTTGTACTGAGAGTGAACGC
ATCATTCAAGAAGTATTTTGCGAGGATCTAGATCTCCATCCGCAAGAGTTTGGCGTCAAT
ACGCATGTGTTTGAGATTGGCATTACCTCCATCCATTTAATCCGATTGAAGCAGAAACTT
CAAAGCCGCTTCTCTATCCCAGAGATTCCCATTCGCATGATGATGCAAAATTCGACCGTT
CGAGAGTTAGCCACGGCTTTGGAGAACCTCGGTAAACCACGAAACTATGAACCCATCATA
TCACTTCAGAATAACGGAAAAAAGGCTCCTCTATGGCTCTTTCACCCAGGAGTTGGCGAG
GTTCTCGTATTTCTCAATCTCGCAAAGTATCTTCCTGATCGCCCAGTATTTGCTCTTCGT
GCTCGAGGCTTCGAAAAGGGGGAAACATTTTTCACAGATATTAAAGAAGCAGTAAACACA
TATTTCGAAGCCATAAAGAGCAAGCAACCGAAAGGTCCATATCTTCTCGCAGGTTATTCG
TATGGTACAATGCTCGCATTTGAAACCGCGAAACTGCTAGAAACGAGCGGTGATGAGATT
TCCTTCCTTGGATCCTTCAACCTGCCCCCACATATCAAATTCAGAATGAGACAACTTGAT
TGGACCGAATGCTTGCTGCATCTGGCCTACTTCCTTAGTCTCATCGATGTCGAGCATTGC
GAGATAATGGCACCACAGCTCCGACAATATTCCAAAAAGCAAGCTATCCAATACATCAGC
AAAGTCGCGAACCCAAATCGTCTTCTTGAGCTTTCACTCAATGAAGAGATGCTTGGAAAT
TGGGTCGACCTCTCATATAGGCTGCAGAGCATGGCAAGTAACTACGACCCCTCGGGAACA
GTTGCGATGATAGATATATTTGTTGCAGATCCCTTGCAAGCTGTGGCAGCGAATAGAGAG
GACTGGAGGAAAAATTCCTTAAGCAAATGGGCGGATTTTAGCAGATCGAAACCAAGATTT
CACGATGTAATGGGCGAGCATTACACAATGATTGGGGCGGACCATGTTTTCAGTTTCCAG
CAGACTTTCCGTAAGGCATTAGAAGCAAGGGGATGTTGA
>dc775c42-5a77-4289-a825-c1357e7f2cad (mRNA) 1311 residues [BFAB_07:375611-377426 + strand] [cds] name=Bfab07g01020.1
ATGTCCGAATCACTTCTATCGGAGTTCCCCCAAGGTGTCTCCGATGCCATTCAATACGAG
CGCTCTCTGTGGGCACATAGTGCCGAAGAGGATGCCGCATTCTACTCGGTGTCTGGAATA
GACATGGCATCTGCTCAACCGGGAACACCGATCAAAGTGCAAGAAGATGCAAACGTGCCA
CAGAACTATACTCTTCCACCTAATACTGCGGTATCGCGATTCATCTATGTATCGGAGAGT
CTATCTGGAGAACGTCGTCCTGTTTCTGGCTATGTCTTGTGGCCTTATATGCCTCGTCTG
GATGCGAACGGCGGAAACCAAGTTGTTGCCTGGGCTCATGGCACATCAGGAACAACAGTC
TCAACTGCCCCATCCAAATTCAAAAATCTCTGGAACCATTTTATCGCTCCCTACCAATTA
GTTCTTCAGGGCTACGTCGTAGTGGCCACGGATTATGCTGGTTTGGGTGTTGGTAAAGAC
CAGAATAACCACTCGATTGCCCACGATTTTTTTGCCTCTTCTAGTGTAGCCACCGACGTT
GTTTATTCTGTTCAAGCTGCAAAGAGAGCTTTTCCTCAACTTTCTGAATCGTTCGTTGTG
CTTGGACATAGCCAAGGAGGTGGCGCTACTTGGGGTGTCGCCCAGAAACATGCTGTATCG
AAAATTCCAGGTTATCTCGGTGCCATAGCCATCTCCCCAGCTACCAGTGTTCTTGATAAT
CCTGAGCCCTTCGGAAGTCTGATAGCTGCAACCATGGCTCCCGGAATTGCAGCGTTATAT
CCGGAATTCGACTACAATGATTTCTTTACGCCTGACGGCCTAGAACTATTCCAGAAAATC
GTCAAGCTCGATTGCGCCTCTTCTACAACCATACCAATATTACTCACGCTTGCTGGCAAC
TTACTAAAGCCTGACTGGACATCTAATGAATGGCTTTTGAAATACGACAATCTGACTGCG
AATGGTGGACGAAAGATTTCTGGACCTCTTCTTGTAATCCAAGGCGACAATGATCCAATG
GTCAATTATAATAACACGGTGAAAAAACTTGGGGCTGCACTTGATCTATCTCCTACATCT
CACGTTCAACTTTTCCGCCTCCCAGGGACCTCACATACCCCTGCTGTAACAGGCTCTCAA
AGAATATGGATGGATTGGATTGCAGATCGATTTTCTGGAGTTCCACTTCAACCTTTTGAT
AAGAATGCAAGTTTTACTAGTGTAGTCACTCCCGCCAGAAATTTGTCAAGCTACGTACCA
GAACTTAATTGGTTTGTTGGGCCTGCAACAGAACCTTATCAAACCCCATAA
>0a9ba1ff-0e2b-49ba-8f23-fd655de7a3ee (mRNA) 861 residues [BFAB_07:378795-379987 - strand] [cds] name=Bfab07g01030.1
ATGGCAAGAACTCAAGCAACAAGTTTTATCGTGTTGTCTGACACACACGATTACCAATTC
GGCGATAATGCATCGAGCAAATTGCAGCTTCCCGCACCAAAAGTTGATGTTCTTCTCCAT
TCTGGAGATTTAACACAAGTGGGAGGTATTTCCGCCTTCAAGAAAGCCCTCAAAATGCTC
AGCAGCTTTGACGCCGAGATTAAATTGGTTATCGCAGGAAATCATGATCTGGAGCTTGAT
GAAGGATGGTGCAAAGCACACCTCGAGGAAGACGAGGACTATCTTGACGACCATACACGG
GCCATGGAGGTAATGAAGGGGCAATTAGCGAAAGAAGCGGGTGTTACTTATTTGGAGGAG
GGAACACACACTTTCAATCTTAAGAGTGGTGCAACATTCAAGATCTATGCTTCTCCATAC
CAACCCGAATTCAATGATTACGCCTTCCCTTATAAACGCAATGAAGATCGTTTCAATGCA
TCTGGGGAAACTGCAGAGGGTGTGATTTCTATTGCTGAGAATCCAATCCCAGCTGGTGTA
GATATTGTCATGACCCACGGACCACCAAAGGGCTTTCGTGACGAGAACCTGGGCTGCGAG
AACACCCTTCGCGCTGTCCAACGTGCTAAACCTTTGATGCACTGCTTTGGTCATATTCAT
GAGGGATATGGTGCCAATAAAATTGTGTGGGACGATGAGAAGAAAGCAAAGGATGACCTG
GTTAATAAGTATCCACAGGCTATGGACTTGCATATTGAGTCTGGCAAAGAAACTCTGATG
GTTAATGCGGCGATCCTGGATGGGGAACACCAGCCTACTAATGCTCCCTGGATCATCAAC
TTAGAATTGCCTTCTTCTTAG
>da8c3cdf-e67e-4b36-ae11-1e888b0d1c14 (mRNA) 2496 residues [BFAB_07:387634-392551 - strand] [cds] name=Bfab07g01050.1
ATGAGTACCGATCCTCAATCAACTCGGGAGCCAGCAGCTGGCCCGAGATCCGGTCCCTCC
TTTCTACCTACCAATATCATCCGTATAAATGATCTCAATGGTTCCGAGGTCGAAGGAGCA
TTCGGCGGCCATAATCCCCAGGAGTCGGCGGTTACGACACCTCGACCCAATACCGCACCC
AATACCCAACCTCGGCCGATGCATGGATCGGAAGATGCAACGACTCCTACGACAGTCACA
TTCAGACCAGCCTCAGATGCGCTTGCCAATCAAAGACCTCTCCCACAAGCCCCTTTCGAT
GTCGCCGCGACCATTCCAGAAACTGTGGCAGGTTTGACAGCCATGAACCGAGACAATTCG
ACGAGGTCAAACAATTCTGTTGGTTCTGAAGACGTTGATATGGATAAATCCGATGCTGCT
AGTTCCAATGGCAATAGCCCAAGGCCGCACAAGAAGAAGAAGAGTCAGAAATTCTATTGC
ACGGATTATCCGCCTTGTAACCTCAACTTTACCAGGACCGAGCATTTGCAGCGTCATATA
AGAAAACACACAGGAGAACGTCCCTACGAATGCTTTTGTGGGCGTTACTTCTCTCGAAGA
GACAATCTACGCCAGCATGCTCAAACGGTGCATCAAAAGGAGGAAATCCCCCCAGGATCG
TTGGCAGCCACTAGCACAAGATTTCCTAGACAGCCTCGTACAGATAGATCTAAGCCCCCT
GGAAGACAAAGAGCTGCCACGGTGAGCGAACAGGTACCTTCATATCGTGGTCATCATCGA
AATTCCTACTCCACTTCCAGCATAATGTCGAATATGTCGCACGTATCCGGTTATAGTCAA
GCACACAATCTCAGACGTCCGCTCGCACTACAGATGCCGAGCCCCCTAACAAGACGCCCA
AGTTCACCTGGAGGTTATAGTACGCCCACTTCCGCTACTTTCTCAACCGGTCAGAATAGT
CCGCGATGGCCAACACTTGGGTTTCAATCATCTCCTGGACCAGGCGTAGGTGTACCAATA
CCAGCTGGTCGCATTTATGACGGGCATCACACGCCCGGTCGAAGATTGTCTACACCCTCG
GCCGCAAATCCGTTCTCTCCTTCTGGTCCCGCTTCCAACCCTTTTGGCACTTCATCAACT
TACTCTGCAGCGGCACCCTATTCGCCAAGCTTGATTTCAAGCCCTACTAACTCGACATTC
AACAATGCTGGACAATCAATGGCTGCCCATCATTCAGATATGGATAATAGAAGGAGAACA
TGGCACCAGGGAACCAATGCGGCTACACTAGCATCATTTACCACAAGACTGCACAGTGTC
ATGAACGCAAACCACTACGCTGATGGTCCTATACCTGAACCCGCCGCGATTCTTCGCAGT
AATGCTCCTCCACAAGAACATGCAAGACTTCCCGGAATTTCAAGCTTGTTACCTGGCAGA
GGAGAATCCCCTCCGCCTCTCCGCAGTCGAGAACAAATGATGATTGACAGACCACACTCT
TACCATCAGCCAAGCCTTAGCATGACTGAGCGTCCAAGAGAAAATCCTGTTGATAGACCA
GCGTCCTATTACCAGCCGATTTCTGACATGGCTAATCGTGGTCCAAGCCAAAGGATGATT
GATAGACCACCGCCTTACTATCAGAACAATACTCCCATGTCCGATGACCCTCGCCCGAGT
CAACTAATGAACGATAGACCAAATTCTTACCACCAGCCAAACCCGATTGTGCCTGAACGT
CGTCCAAGTCAAATTATGACTGATAGACCAAGCTCTTATTATCAACCAAGACATTCTATA
TCAGAATCTGTTCCCTATTCTAGCTCAAGACCCATGACTTCCAGGGACCGACCTCTTAGC
TCTCACCTTGATCGACAATTCAACCAACTAGAAATCCAAGGCCCACCACATGCGGATGCT
GCAAGCTGGGCTACCGAGACAGCTCGTGCTGTTCATGCAACTGCGCAGCAATCACAGGCC
AATCAGCCAAGAGTCACATTTGAGCAGCCAGCACTTGGTCCTCGAACAGGGGCTTCTTCG
TCCTATCATCACAAGCATACTGCTAGTTTACCTGTCAACATGCACAGATCAAACAGACGC
GATGGATGGTACAATGGTCCAGTGGTATACCAACAGACTTCTGATAACAGATTTCAAGGA
ACCTCTCCGGAAGGGTCAACTGGCTCCGAAGGTGCAGCGCCTATAACTCCACAGAGTGCC
ACCGCGACAGATTATAACCCTGCCGTTGTACGATCAAACGGGTACCACGAGGAACATTCC
CGAACCGTTCATCCCCAACAACCAACTGTTCACCACTACCACACACTATCGAATGGCAAT
GAACATTCTTACACACATAAGCCCCCTACGTCAACTCAAACCATGTATCCACAAGTCCCT
CAGTCATCTACACAACATTATCGCACTGAAGGATTGGACGCTCTGGCAGCAGCCGCAACA
AGTGGTCAGATCAGTGTACACAACAATGCATTTTGA
>c02c89a3-d5bf-4a91-aa34-a3197fba5ac9 (mRNA) 3948 residues [BFAB_07:397028-402098 - strand] [cds] name=Bfab07g01060.1
ATGGTCACATTTGAGCATGACGCCTGTGAGAAGATTCCATTAATTCGCCTCCCAACTGCG
ATGCCAGCCGAGTTCAGTTCGGAAACACCTATTAGGGTGTCTGAAGTTCATAGGGTACGA
GAAGTTTACAAATATCTTCCCCCCTTTGCAGCACCCCCCATCCCCCCGCGCGAACAAAAT
GATAAAAATGCAGAAAGTTCCAAAAACTACCCCAAGGCTTTCTCGTCATCGGATAGAGCA
CTCAATGCCTTTGCACAACTTGGTGCTCTGCGATTAAGGGCAAGGCGGGCTATGATCTCC
CTTGTTGATCGCACACATGAATATATTTTGGCAGAGTCGACCAAGACATTATCATCACAG
AATGATGATGTGCACGATGATGGAGATTCCCTATGGCTAGGCTTACGAACTATACCTCGC
GAAGACTCATTATGTGCTGCTTTTATAAACACACCACGATCAGAGAGCCAGCGCAACGAT
ACTGAATTTCGACCTAAGGTAATACCAAAAGTTATAAACGATCTGTCTGGAGAAACTTTG
CGTTTCGACCCCAATATTATTGGATGCCCGAAGATCCGGTTCGTGGCTACTGTGCCAATA
CGATCTCGTCAAGGATTTGACATAGGCGCATATAGTGTGTTTGATGACATACCTCGGAAC
GGATTGTTGCCAGAAGAATTGGAATTTTTAACGGACATAACTGATACAGTGATGGAGCAC
CTTGAGAACATTGCTGTAAAGCGAGACCATCAGAGAGGAGAGAAGATGGTGAAAGGATTA
GGATTGTTTGTGGAAGGCCATTCTAGCATCAAGTCTTGGTGGCTGCGCACTCGAAATGAT
CGCGAAACATCTGTTCGGGGCAAAGATTCATATGCTATAAGAAGCGTAGGGAATCCGACG
ATTCCTACTGAAGCTTCCCTTGAGAATTTAGCGATTGCTGGCCCTGAAGCAAATTCATCG
TCTGCCAATCGATTTCAAAAGATGGAGGAGTTGACATCTCTACTTCCGACCTCATCCTCA
CCTCCAAGTAATCTTTGCAATGGTCTGCCGCTCAGGCCGGGAGGTGAACATGACGAATCA
AATAACCATTCCTATGTTCAAGTGAGGAATATCTCACCCTGCTTCAAGGAACAACTCGAC
CAACCATCCACCCTCAATTCACCCATTCATTCTCCTCAAATACCTCTTGACTCGCCATCA
AACGAAACCCCTAGAAGCTCATTATCCAAGTCTCTCGATCAAGCGCATACACCTATGACA
CCTAGAGATACAACTATCAACGATGTTAAAACTCGTTCTCCTTCCGAAAAAGCCGAAGTT
TTAAAAAGAATGCTTTCTCGTGCTAGTAATCTCATACGTGAGTCGACAGATGTGGAAGGC
GTGATTTTTTTTGATGCTAAAGAAAGCTCTTTTGGACGTCAATCTTCTTTGAATGATCAA
GAGAGAACCGCTGGCTTACACGATGCTGCACAGATTTCCAGCAGCGAAGATGCTTCAAGA
ACCTCTTCGCGGCACGATACCTCGGATAGTGTTGATGGAAGGGATTCTGACAGGGGGCCA
GAAGTGAAGGCACAGTCGTCGCAAACACGCATGTGTGAAGTACTAGCATATTCCACAGCC
TCACGTTGTACATTGCGTGGGGATGCAAGTTTTCCAGAGCACCTCACTGTTAAAGAAAGC
TTTGTTCGCCGCCTTCTCAAGCGCCATCCTCATGGCAAAGTTTTTGCCTTTGACGAAGGA
GGTCATATGTCGTCAAGTGAAGATGAAATTCTCGACGCTGCGTCGACTGGAGAAATATCA
ATCGTTGCGGAAACTTCCCAAAACTCGATATGTCAGAAAGCATCTTCTAAGGTTATGGAA
GGTCGAACTATGCTACAAATATTTCCCGGCGCTAGATACGTAATGATTTTACCATTATGG
GATTCACATAGTGAGCGCTGGTTTGCTAGTACTATGCTTTGGACCTCAGATCCAACTCGA
GTACTTAGTCTAGATGACGATCTAAATTATGTTGCTGCTTTCGGAAATAGTATCATGGCT
GAAGTCTCTCGTCTAGAGATAGTCGCATCTGACCAAACGAAGACTGCTTTGATATCATCA
ATAAGTCATGAACTGAGGAGTCCGCTACAAGGAATTCAAGGATCGATCGAGCTTCTACAA
GATACACAAATTAGCACATATCAAAGGAGTGCGTTGGAGACAATTGGACATTGTTCTACA
ACTCTACTCGATACATTAACTAATGTACTTGACTATGCCAAAATCAACAATTTTACCACG
GCGCAAAAGACGGAACAAAGAGTGGTACGCAACTCGTCTAACAGAAGAAGGGCCGTTCCA
GCAGAGAAGTTTCAGATTTACGGGACAATCAGCTTGACCTCAGATCTTGATATTGCTTCA
ATTACAGAGGATGTCATTAATGGGATATATGCTGGGCACATTCATGTTATTCACTCGAAT
CCACATTACACTTACACTGATATTGACTACCTAAATTCGCCTACCAATTCTGATTTTCAA
GGAACGAAGGACTCAGCGCCGTTAACTGTAATTCTTGATGTAGACCACAAATCCAACTGG
ACTTTTTTAACTCAACCTGGGGCTTGGAAGCGTATTCTGATGAATATTTTTGGCAACGCA
TTGAAATATACCACATCAGGATTGATCAAAGTCAGTCTTGGGTGTAAGACTGTCACATCG
AAAAACTCAAGAGTCAATCAAGCGTTAGTTACTTTGACGATTAGTGATACCGGTAGGGGA
ATTGCGGAAGATTTCCTGAAGCGTCAAATATACACCCCTTTTGCCCAGGAAGATAGCTTG
ACACCTGGCGCTGGATTGGGTCTCAGTATCGTTCGTCAAATTGTCGGAGCACTCGATGGG
AAAATCGATGTTTTTAGTATCCAAGGTACCGGTACAGTCGTCAACGTTGTTCTCAAACTA
GATCAGTCCCAACCACAATTTGGCGACCTACCTCGCATGCCAAACAATATCGAAAAAGCT
AGAAGTTACACTCATGGCCTAGAGTTGGTATTGATAGGAATGGAAATTTCACCGCCTGAA
CCTGAGAGAAAGGCAGGTGGGGAATCTAGCTATGATATATCTGTGGGTCCAGCAATCTCT
AGGATGGCCAGGAATTGGTTTGGAATGAAGCTTAGTGAAGCTGTTGGACTTGATGCAATG
AGTGCAGATGTCTTCATGGTAACTTCCGAAAAATTCTACGAACTGGAGGATCATTGGAAA
ACTCTCTGCTCGGAAACTACAGGTGATACTCATAAGAAGCATTTGATTGTTTTAACAGGC
TTTGAACAATCTGAAAGAAGAACCTTGTTCAAGACCCACCAAAATATACATTTCCTCAGC
AATCCAATTGGCCCCAAAAAGCTCGCAGATTGTTTTCTCTCTATATTCGAAAGATCTAGT
AGCCGGAATAATAATTCCTTCCTCACAATGCCTCCTAATCCACGACGAACCACTTCTCCT
GCTCTTAACACAAGTAGTGCTAAACCAGAACACAATCGTTCACTATCCGAAATTCTCTTG
ACCACTAAGCCGATCGCACTCCTCGTCGAAGACAACACCATTAATATGAAAATTCTCATC
GCCTGTATGAAAAAATTATCTGTGCAATATTACTGCGCAGTAAATGGTCTACATGCAGTA
ACCACCTACCAAAACGCGAGAGTGAAACCTGATATTATTTTTATGGATATAAGTATGCCG
ATCATGAACGGGTTTGAGGCATCTCGAAAGATTAGGGGGTTGGAGAAGAGAGAGGGTTGG
AAAGCAAGTGTTATAGTGGCGGTGACTGGGTTGGCTAGTGATGAGAGCCAGAGGGAGGCA
TATAGTAGTGGGATCAATCTTTTTATGAGTAAACCTGTACCTTTGAAGGAATTGGAAAAG
ATAGTGGTGGAAATGGAGAAGGAGAGCGAGAGGAGAGGGAGTGGGTAG
>dcdbd6bf-ef4a-4b52-83d0-90c34bbc8aa1 (mRNA) 1416 residues [BFAB_07:402569-405539 - strand] [cds] name=Bfab07g01070.1
ATGATCATCATTACAATTCTTTCTTTTCTATATCTGGCATTACCAGCGAGATCAGCAACC
GGCCAAGCATCAAACTTCAATGTCAGCATAGTTGAGCTCCAATCATATGGGTGTAATGCG
TCCTGTCAAGCAATCCTATCCATATCTAATACTGCCGACCTCGAAACCGTCGGTACAGAA
TTCGACTTTGATTTCTACAGTACAGCAAACAATTTCTCTTCCTCTACTCCAGGCGACCTT
CTAAAACTGCAACCAGTCGATAGCTCTGCCCTGAGCATACCCGATGGCATTGCAACTTTT
CGATTTCAGTATACTTCCATAGACTTAGATGGTAGTATCGTACCATCGGGTGGCTTCATA
GCATTTCCTTTTGCCTCACCAGCAAATGGGAGTCAGCTTCCCCTTGTCGCCTACGCCCAC
GGTACAATTGGTGTTCATCGAGGATGCGCGCCATCATCTTCCCCAAGTCTTTTCAACTAT
AATAGCTGGGCTCAATTGATGTACAGTGGCTATGCTGTTGTAGCCACCGATTACGCCGGT
CTCGGAAACAACCATACCTTACACAAATACAGTGCTTTCACGGCTCATGCCAATGATGTA
CTCTATTCCATCCAGGCAGCTCGGAAAGCATTTCCCGGTGTGTTCACAAAAGAATGGGCG
AGTTTGGGGCATTCTCAAGGTGGTGGCGCCGTGTGGAAGCTATCGGAGCATCCTCTTATA
CAAAACCATACCTCTGGATATCTTGGAACAGTTGCCATATCTCCCGCATCCAAGATTTTT
GACATGGCGGTCGAGACCTTCGAACGCATAGTCCCTCGCCCTGGTTTTCACCAGTTTGTC
GTTACTGCCGAATTGGGCCAAGTTATTTACGGCCTCAAAGCAATCTTTCCCAATTACACG
TCGCCATTTTTGGCCTATGGGTTGAAGAAGCGGGTGGAGTTGGCCAATGTAATGCAGTCT
TGTACTCTGGCTTTCATGGGCCTCTCCCTAGACTTGCCACGGGACCAGTTCGCAGTCGCT
AATGGAACACCTGCGAATGATGAACTTTTCAAAAAATTTCAGGATATGAACGCCCCAGCA
CAAGGTGATCGAGCTTCGAAGCCAATATTGATCATTCAGGGATGGAACGATACTTCGGTT
CTCCCTCAAAGCACCTTGGCGTCATTCCAGGAAACCGTGAAAGCAGGCAATGTTGCGCAT
TTGGTTAGATACCCGGGACTGGACCACTCTGCGACAATCACAGCTTCTACTCCTTTGTGG
TTGAAATATCTAGCTGAGCTGTTTGCTCATAAGAAACAATCTCACAAGTCGTCGGATACC
ACGATTGTGCCATTCAATTTGGACGTGGCCAAAACCCCATTAGAGCTTCCTCTCAACGAG
GAACCTCTGTTGAGCTTACTGGGACGGGGTGAATGA
>e9e25daa-0734-42e4-b591-e5b39b7cb4a6 (mRNA) 1614 residues [BFAB_07:405675-407744 - strand] [cds] name=Bfab07g01080.1
ATGGGCTCTGTCTTCTCACTCTTGCGAGATGGCTATTTCGGCATCTTGGGCCTCATTGCC
ATTATTGCCGAGAGCAATAAGGCCGCTTCTGCGCTGCTTGATCGCATCACTCAAGTGAAA
TTTCCCCACGAAAATCCCACAAGCTCTTTTTGGGAACAGCAGCCTTTACATCCTGAACTT
GTAAATATTCAGTCTGAGCAATTGGCTCCACGTGCAGATATTGTGATTATTGGGTCTGGT
ATGACTGGAGCCAGTGTCGCATATACCATCCTGAATGAATGTCTGGCTATTGCGAGACCA
GTAAAAGTAGCTATTCTAGAGGGGCGGACTATATGTAGCGGTGCAACGGGCAGGAATGGT
GGACATATCAAAGTGGCCCCTTTCTATGAGTACAAAAAATTTAAGGATAGGTTCGGAGCC
GCAAGTGCGCAAAAGATATTGGAGTTTTATTTGAAGCATAGACCTTTCCTCCTCAACTTA
TCTAGAGAAGAAGGATTGAAAGAAGGTGAAGCACGAGACGTTACGACAGTGGATGCTTTC
ACTGATGCGGAGAGGCTTAAAGAAGCTACTGAGATGCTATGTATCCTGCGAGAAGATCTA
CCCGAGCTTGCCAAAGGAATTGAGATTCTAGACGGAGAGACAGTCCAGAAGCAATTTGGT
TTCAGTAGTCAGTTCCATGGAGGGATTACCTACACCAGTGGTGCATTATGGCCATATCGA
TTTGTCACTGCTATATATGCGGCTCTGCTATCAATATTTCCAGAGCAGTTCTCTATCGAG
ACAGGAGCCATGGTGCAATCAATTCAAACTACGAGTAACCCAGATAGTCCGTTCCTTCTG
AACACCTCACGGGGCGACATCACAGCCGCACATGTCGTCCATGCAACAGAAGCCTTCACC
GCAAACCTAGTACCCGGATTGGTTGGGAAACTTCTCCCTCTGCGTGGATACATGTCTGCT
CAACGACCAGGAAAATCTTTTCCTCACTACGATGGTAAGACCTCTTGGTCTATCGTTGGT
AGTCGAGACTATGAATATATCACGCAGCGGCCTGGAAAGCCCGATGCGACGGATGGTTTG
GGGGCTGAGATTATGACCGGAGGTGGATCAGTCCATATGGATGGCACCGGCTTAAATGAA
GTTGGTCAATGGGACGATGACAAGATTGAACAACCCATCGGATCATATCTCGCAGGTGTA
CTTCCGGTATCTTTCCGCTCCAGTTTTTGGGGAGAAGATGCCAATGGCTCTATCGTGAAA
AGTATGTGGACCGGTGCCATGGGACTAACTTGTGACTTCATGCCTCTCGTAGGAAAACTT
TCACCAAGTCTAACCAAGCGTGCTGTGAACTTAGGAAACAAGCAGGTCACTGCGAATACA
AATGCTGCGCCAGCAGAGTGGATAGCAGCAGGATTCAACGGATCAGGCATGGTTACCACC
TGGCTAAGCGGGGTGGCTGTTGCACTCCAGGTTCTCGGTCGCGAAAATGTCAATTCTAAT
GGGCAAATCTGGAAACCAGATGGAGTAGTCAGCGACTGGTTTCCAGAAGAGTTTATTTGC
TCTTCGAAAAGGGTTGCTCGAAGCAGCATCCACGAGCTTCCCCGTCTCATATGA
>78742ba7-735d-4b84-a6d0-59d53b7cd15b (mRNA) 2214 residues [BFAB_07:409113-412127 + strand] [cds] name=Bfab07g01090.1
ATGAAGGTCTCTCATCCACTCTCTTTTTTTAGTACAATTTTTCTCTCTCACCTTGTTGCG
GCTGGTCCGTTGTGGCGCAACGGAACAAGTAGGAACTTTATACGAGGGGGTGAAATGAAA
AGGGATAGCGTTACTCCCATCGCGATCACTATTCTACCTGGGACGGTCACTTCTTCGATA
ATTAGTTCTACAGCCCAAGCCGAATCCACATTGTCGATAGAAGGCACCACCTCATCCAGC
ACAACAGATTTTACTTCACAGTCGAGCAGCACTTCAGCTACGTCCATAATACAGTCAACG
GAGGGATCGAAAACGACAGAATCAAAAAGCGAAACGAGTACTTCTAGCACATCATCGGAC
AAAGATAGCGAATCGAGGACTCCATTGAGCTCTGCTACATCCTCGCAACTAGCGTCTTCA
ATTATATCGAGTATAGGAGGTACAGCTCCGATACGATCAAGTAAATTTTCAAATACCGAA
ACCATAGATGGAAGCGTAATTCCAAAAGCAACAGAATTAACTCTTACTCTTACTCCACCA
CTAAGCACAACGTCCACCGGGAAATCTTCTACGAAAACTGAAACGTCAAGTCAGGGTACA
TCTGAGTCACAAGCTGGTTCTCCCTCATCGAGCCAGGTTTCTTTGCAGACTACAACGTTT
GCGCCTCTTCCTACTAGTTTACCTGAGAGTAGTCTTACGGCGAAAGCTTCTTCAGTCTCA
CTAGATAGTTCGACACTGTCAAGTCTGAATTCTGTTCAAACTACAACATTCCCACCGCTT
CCAACTACCTCTCCAAAGGCTACTACAACCCCAGAAAGCTCTTCGGGTGAAACTTTCGAG
GGATCTCCGTCAGCAACTTCATCATTCGTGCCGACATTAGCGTCGAGTATATCAGTCGCA
CCATTCGGTACTGGAAACTCAAGCACGGCAGCTACAGGAGATCCGCAAAGTTCCGGTAAT
TCGGATCCGAGTTTTGGATCCACGATTGGCATCACAACGGAAGCTTCTGGGATCACTTCT
CAAACTTCTATAAGGGAAACTCTGTCACCTACCACGGTTTCATCAAGCACTGCTAGAGCT
TCAAGCTTGGTGGAAAGTGTCGTTTCGACGAAGGAGACTTCAAAGGTTACCGCTCAACCG
CAAAGCACTATCGTGCAGTCTAGTGTGGTGGCGACTCAAGACTTAGGATCTACCACAGGA
GCATCCGACCAGAGCATTACTTCTCAAACCCCAATAACTGGAGGTCTGTCTCAGGCGACA
TCGATTGATTCTTTACAGACAACATTTGTATACGTAACCACAGTTGTTCCATCTTCAACT
CTTGGAGTTATCCCATCCTCCTCCTTTTTATCCAAAACCTCAACTTCATCTACACAAGTA
GAAACCACAAAACTTGAATCTTCAACATCTTCACTCTCTTCGGCAGCAATAACCATCAAG
ACAACCGAGGTCTCTTCGTTTTCCTCGTCCTCGGAGCCACAAACTACAATTTTCCCCGAA
CTACCCACTACACAACCTGCTAGTACAGCAGAAATTCTCGTAACAACCGTAACACTATCA
AGTAAAACAAGAGAATCGACTTCTAGTACCACAAAAATATCCACTGCTACATCCTCCATC
AAAGAAACCACAACCCAAGAATCTATCCTCCTACCTACCACCCAGATCACTACAGCTGAT
ATCCCCAAGACTACTGAAATAGCCAGCACTATAATCATCAGTATAAACACTGCAGATTCG
AATAATGGAGCTGTAACTGTATTGACCATCATTCCTGTTACTGCTGGTTCAGGTTCAGGT
TCTGGCAACGACATTGGCATTACCAAAACCAATGATGGAAACAGCGGCGCAACCACATCC
ATAACCATCATCAACACCAGTCCCACTGCTACCACAACAGCCGGAGGTAATGGCCTAGCG
CAGACTACACCTACTCTTTCGCCCACTTCTCCGACTCCCATACGCACGTCTATTTCTATA
TCTACAAGTGCGATAGATGATGGGTTGAGAACAACGACGTTGAGTATTTCACCACCGAAG
GAAACGATTATTACTAGTGCGCCTGCAGTGACGACTACGAGCGCGGCAGAGAATATTTGT
TTGGGGGTGGGAGGGGATGGGAAACTTACTAGTATGAGTAGCTGTGTGGGTGGCGCGACG
GAGACGGTGAGTGTGACGGTTACGGCAAGAGAGACGGTTACGGTTAGGGGGTAG
>eecc58fc-621a-4542-82e9-3f7dcf2d50e6 (mRNA) 1005 residues [BFAB_07:412317-413736 - strand] [cds] name=Bfab07g01100.1
ATGGGTTTCAATCAACGCATATTACATGTATTCAAGCGCAATAGATCATTTACATATGCA
GAATTAGACCCCTCACATGTAAGCTCGGATAACGAATATCAAGATGAAGATCGACTTCTG
AATCGCCTTTCTGTCGGCGATGATTCATTTGAACATGCTGAAAAGGGAGAAACTAATTGC
TGCCATAGGCATCACTCATTTGTGAGATGTCTGGGCTGGCTGAATGGTCTTTTCTTTTGT
CTGTCTTTGTACTTGTTCACCGCTGCCATGCTTAATTGGAAGCAAGTCCCAGGTGGAAGG
GAGCGAAATTGGGCGTTGAAACAAGTTTCAGAAAAATCTCCAATTCTCGACGCAATCGAG
ATTCCGCTTTCAACCTGGCGACTCAACGGCACATTTCTAGAGCGCGAGGACGAATCCATC
TATCGAAAACCCCCATCTCCCGAAGTCGATGCAGCATGGGCTCGTATCGAGACACAAAAT
CCCATTCCCCTATCCCGACAAGATCTTGTCAATCAAGGAAAAGATCCAGATATGTACGCC
AAATTTCCCGAATCTTTTGGTTTCGGCCCTGACGCCTTCATCGGACGCATCGACGTCTTT
CATCAAATTCACTGTCTCAACCGATTGCGTATGCATCTCTATTGGAACGTAGCATACTAC
TATCCTGACGAACAGATGGGAAAATACCACCAACTGCACGCTTCGCATTGCGTGTATGCG
CTGCTGCAGAATCTGATGTGTCAGGGAAATGTGGATACGTATGGTCATTACTGGGTGGAT
ATGCAGGAAAATGCAGTGCCGGATTTCAATATCAATCATAAGTGTAGGGATTTTGAAGCG
ATACTAGAGTATCATGATGAGATTGCGGTGCCGTTGGAAGAGTTTGGGGCGTTGAGGAGA
CCGCTGAATGAGCCGGTTAGACATATGTCGCATGAGGCAAAGGAGATCTTTAGGTGGTTT
GATAATCATGAGGATGATGGACAGGATGGAATGGAGATTTTGTGA
>05e629e6-a875-4d1b-9122-363e2d744ea3 (mRNA) 1605 residues [BFAB_07:417823-420263 - strand] [cds] name=Bfab07g01120.1
ATGGCGGACGTGGTACAAAACATCACTTATGCCTCACCCGTGGCAGATGCAAAACTTGCG
CAGATTATTGGGCATCCCCAGCTCAATAGCTATCTAGCCAAGCTGGCAGAGGTCAGCGCA
TGGCAGATTGTGCTCACGATTCTTTGCCTGATGGTAGCGTATGATCAGTGCAGTTATATC
TGGCAAAAAGGTTCAATCATCGGTCCAGCATGGAAAGCCCCCTTTATCGGTCCATTTTTA
CAGTCTGTCAATCCTAAATTTCACGAATATCAAGCAAAATGGGCAAGCGGCGACCTCAGT
TGCGTATCTGTTTTCCACAAATTCGTTGTCATTGCTTCTACTCGTGACATGGCGAGAAAA
GTTTTCAATTCCCCAGCATACGTCAAACCATGTGTAGTCGATTCAGCACATAAATTATTG
GGCGAGACCAACTGGGTTTTCCTTGACGGAAAGGCCCATGTTGATTACCGAAAGGGTCTC
AATGGATTGTTCACTCGCAAAGCTCTCGACTGCTATCTCCCAGGACAAGATGACGTCTAC
AATCAATACAATGAAAGATTCGCCAAGGTTACCGAGGAAGCTGGAGGAAAGCCTGTACCA
TTCATGTCCGAATTCCGAGAATTGTTGTGCGCCGTTTCCTGCCGTACATTCGTTGGTTTC
TATATCTCAGACGAAGCTATCAAGAAGATTGCGGACGATTACTACAACATCACTGCTGCC
TTGGAATTGGTCAATTTCCCAATCATTCTCCCATTCACCAAGTCTTGGTATGGAAAGATT
GCTGCTGATATGGTTCTCGAGGAATTTTCCAAATGTGCCGCAAAGAGTAAGGTTCGCATG
GCTGCCGGTGGTGAAGTTTCTTGTATTATGGATGGATGGATCAAGTCTCAACTCGAGTCT
GTTGCTTGGATCGAGGCAGAAGCAAAGGGTTCAACTGAAGGAATGACAAAGCCAACACCG
TTACTCCGTGAGTTCACCGACTTCGAAATCGCTCAAACCGTCTTCACCTTTTTGTTCGCT
TCCCAAGATGCTACTAGCAGTGCCGCCACCTGGTTATTCCAAGTTATGGCTCAACGTCCT
GAGGTTTTAGATAAGGTCCGTGAGGAGAACTTACGCGTTCGTGGTGGCGATAAACGAGTT
AGACCAAACATGGATATGATGGAAAGCATGAAATATACTCGTGCCGTGGTTAGAGAATTG
TTGAGATGGCGCCCTCCTGTTCTCATGGTCCCATACGTTGCGAAGAAAGCATTCCCAATC
ACCCCAGATTATACTGTTCCCAAAGGAGCCATGATTGTGCCAACAACATACCCAGCTTTA
CGCGATCCTGATGTATATGACCGACCTGATGAATTTGATCCCGAACGTTATTTCTCTGGC
GACGCAGAAGTAAAGGGTGCTAAGAACTATTTGGTCTTTGGAACTGGTGCTCATTATTGT
CTGGGACAAGAATATGCCCAAATGAACCTTGCTCTTATGATTGGAAAGGCATCGATGGAA
CTTGATTGGGTCCATCATCCTACTCCAAAATCAGAAGAGATTAAGGTCTTTGCTACAATT
TTCCCTATGGATGACTGTCCATTGACCTTTACAAAGAGATCTTAA
>479352d8-cb9c-46b9-910b-6b25ed626d6a (mRNA) 582 residues [BFAB_07:427165-428091 - strand] [cds] name=Bfab07g01130.1
ATGTCTACCCCTCGAGTATCTCGCACATTAGCCCGCGCGTTCCAATCGCGCATGGGAGCT
TCGTCTGCAAAATGCTATACCATGTCGCATTTCTCCACGAGCAGTCGCAACAGTTTTAGT
GCTCAGATTCGAGATGGCGGGTTGAAGAGTACGGGGATCTTGGGTCGGGAGTCGGCTCGA
CATTCAAGACAAGTTCGGTCGTATTCGCAAGAATCGGAGGCGAAATCTAAATACTACACT
TTTGAAGACATGCAAAAACTCACGTCTGCTCCACATCCCGATACTCACATCATCGATGTT
CGCACACCCCTCGAAGTGCAGCAAACGGGACGCATTCCCAGCGCGGTGAATATTTCCATA
ACGTCGTATCCGGATGCGTTTAGTATTAGCGAAGAAGAATTTGAAGATCGCTTTGGGTTT
GAGAGGCCGGGGAAGGAGGAGCACTGTGTGTTTTATTGTAAGGCGGGGGTGAGGTCTCGG
GCGGCGGCCCAGATTGCGAGGGGGAATGGGTGGAGCAACGTAGGGGAGTTTGAGGGGAGT
TGGGGGGAGTGGAGTGCGATGGGAGGGGAGGTGGAGAAGTAG
>5bf7d6bd-2148-41d2-9162-f455f729fcd7 (mRNA) 864 residues [BFAB_07:428467-429830 - strand] [cds] name=Bfab07g01140.1
ATGTCAGGAGCTGGATATGATGTCGTTGTCGATGTGGATGAGGAAGGCGATCTAGGCCAC
ACTGATCTCCAAGAAGATCTCTCCTTCCACAATTCCAATTTCGAAAACAATCCATCCTCA
TCCCGCCATAAGCCCACATCGCCTGGTCTCCCCGCTCCAGCAACTGCAGGTGGTCCCAAT
ACCTCGAAACGTTATCTCTGGTCCCTACATTTCTACTCACAGTTCTTCGATGTCGATACT
TCTTCCGTTCTAGCACGATGCTGGGCAGCTTTATATCCTCGTGCAAATTTCTTGGATGTG
TTGGAGGGGAATCCGGACTTGTATGGTCCATTTTGGATTGCTACGACGGTTATTTTTATA
TTGTTTATGGGAGGAACGGTTAGTTTGTATCTGGCGGAAAGAGGAGAAGGAAGATTTGCA
TACGATTTTGGGCTGTTGAGCGGCGCCGCAGGTCTAATCTATGGATATACATTCGTAATT
CCGATCCTTCTCTTCCTAGCCCTTAAATATTTTGGCAGCGAATCTGCCAATCTTCTCGAA
TGCGCCGCTCTTTACGGCTACTCCAATCTCGTATGGATTCCCGTCGCATTGGTCTCCTGG
TCATCCTTTACAATCATGAATTGGGTATTCGTAGGAGTCGGATTTGGGTTGAGCGTTGCT
TTCCTCCTTAGGAATTTATATCCAGTTCTCAGCGCTACGGATAAACAGACAAGTAAAATA
CTACTTATCTTAGTGGTTGTTCTACATGCAGGTTTGGCAATTGCTATTAAGGTGTTGTTT
TTTGCCCATGGAAGTCCGGTAGCCAAGAAGCCTGAGGCGGAAGACCCTGCCAAGGGGGCC
GATCCAAGTAGGATGTTGTTTTAA
>4a5b5cf9-1a15-42a5-a59a-8fff1710578f (mRNA) 1698 residues [BFAB_07:431736-434017 - strand] [cds] name=Bfab07g01160.1
ATGTCATCGGCGATTGATTATCATAAGTTTCGCAGAGGGGAGACATGTAGTGAAGAAGGA
TGTCGCGCTCGAAAATTCTATATTGAAGATGGTAAAAAGTTTTGTCAACGAGGCCACGAG
CAAGCGGGTTTTACGCAAACTCAACAAGATGAGGATGACTGGAATCAACAAGGAAAGAAG
TCAAGAAAGCGGCGGGAGGAAAAGGAGCAGGTGGAAAAAGTTTTCGGGGGTCGTGATGCC
ACACAACTCTACTTACAATGTTACCAATTAATTCTTTGGAAACAGACCCACTGGCTAGTG
ACAGTGAAGGGCTTTCCAAAAGAATTAGAAACTATCGTAAGAGATTTGTGGGAATTGAGA
CTGAGAGTTTTACAAGGTTCGGGAGATGAGAGAAGTGAGTATGGGACGGAATTTGGGTCA
ACGACAGAAGGAGACGACACGGATACGGATGGGACGGGGTATAGAAGTACGGCTTCGACT
GTTATGAGTAGGAAAAGAGCATCTAGGGCCAAGAAGAATCTTCCAAAGTTGATTGAGACT
CTGGGATTTTGTTACCTTGGAATATTGCTTTTGCGATTGCCAACAAGTTTAGGGGAGATA
TACAGATGGGCAACCAGGGATGAGATTCTTTATACTCGAGCGATTAAAGAAATACCTAAA
GAGATGAGATCTCGATTACCAGGTCATTATTTCAGAGCACTCGAAATCCATGGTATCTTG
AATGGGCATAGACTTCATCAGACAGTACTTGACATGGTTTCTTTTTTCAATTTCAATTTC
GAAATGGTGTTTCCCCCAATAAACCACAAACTACTTCTATACAAGAGTGTTAGAGATCTG
GGTCTCACAGTTGACATTTACATGGCTGTAAATCATCTTGCTGAGATTCTGGAATACAAT
TTTTCATACCCAATCCATAACAAGCGGCTACATGGAACAACTGGATATCCAGAATATCAA
CTCGCCAGTCTGATAGTTATTGCCACAAAACTCAGCCAGCCATTCGATGACATACAACGT
CACCCAGAAGGCAATCTAGATGCCACAGCTGCAAGAATCAACTGGGCTAAATGGCAAACT
ATTATGTTCAATAATCCGATTGAAGGTATGAAGCGTGGAGACGAGATCAAAATTACAGAT
GCAGACGTTTTTAATATGACTGGAGAACAAATGGATGACTGGATGGATTGGTATCACAAA
ACTTGGATCGATGATAGAGATCAAAAAGTTCCTCAGCAGATTTTAGAGCTCTTCCCATTG
CCGGATATTATACCTGAGACGACAATGGGAATAGTTGATCCCGATCCAATCAATCGGGCC
AAGGAAGTTCACAAAACATTGACCCTTCAAAAGCCAGTGGCTCGTGTGGACGATGGAGGA
TCCCAAGATATTGTTCGTCCAGGTGAGAAGTATAGAAGATACCGGACAGTTGAAGAATTA
CCTGAAAGTGCCAAGGCCTTTTTTGAGATTGCTGCGAGAAACATTGGAACTTCTATTGAA
AAAATGGTACACGGCGTTTTTACTACAGAAATCCAATTAGAAAAATGGATGTTGGATGAA
CGTAGGAAAGAGTTGTTGGAGCAGGAGAGCGAGGAAGAAAGCGCTGCTCAGGAGATGACA
CATGTCGTCGGGATGGATCGCGAAGTCGGGGAGGAAGAATTCGATGAGGGCGACGTTGAT
TCTCCTTTGAAAGAGTGA
>52971f1d-ced7-4fae-bb14-41d1e7e07e59 (mRNA) 498 residues [BFAB_07:434095-435308 - strand] [cds] name=Bfab07g01170.1
ATGTCTGGAGAAGCCCCAGTTGATGACTCTCAACATGAGCACACCTTCGATTCTGCCGAT
GCCGGTGCATCTACCACCTTCCCCATGCAATGTTCTGCCTTGAGAAAGAACGGCCACGTC
GTCATCAAGGGCCGCCCTTGCAAGATCATCGACATGTCTACCTCCAAGACTGGTAAGCAC
GGTCACGCCAAAGTCCATCTCATCGCCACCGATATCTTCACCGGAAAGAAGCTCGAAGAA
CTTTGCCCATCCACCCACAACATGGATGTCCCTAACGTTTCCCGTATCGAGTACCAATTG
CTTGACATCGATGATGATTTCCTCTCCTTGATGTCTGAGGGAGGTGATACTAAGGATGAT
GTCAAGTTGCCAGATGGAGAGGTCGGACAAAAGATCCGTGCTCTTTTCGACTCTGACAAG
GACACCAACGTCATTGTCCTCACTGCTATGGGTGAGCAACTCGCTATCGATGGAAAGGAG
GCACCAAAATCTGGTTAA
>70481d4d-06f5-411b-a84b-65b48c317d70 (mRNA) 2016 residues [BFAB_07:435972-438505 + strand] [cds] name=Bfab07g01180.1
ATGTGGTCATTAGATCGATTATCCGGACACACAACACCGTCTGCCTCTCCACCTCCCCCG
TTAAATAGGATCCCAAATCTCCCTCGTCGTCCGAGTCATCTTGTGCCATCCCCAGTTGGT
GGTAGACCTCCTTTCAACCCAAGATCGTCTTCCCTGTCGTTAATCTCCAATGACTCTAAT
TCATCGTTGCTATCATCACGGAGACCCAATGGTTCGAATCTCAAACAAGCAGTCACATCT
CCGAATGTGCCAGATCCTTTGGAGGTTTTGGGAACACTACTGGATAATGGGGAAGAGACA
AAATTGCCATCAGCGAAAAGCCCGGGGGCGACAAATGGGACAGTTGCTCCCATTGAAGAG
GAAGACGATGAAGGCGAATGGGATTTCGGAGGTTTAAGTCTGCAACACATTGTAGCAGGA
GAACCTCTCGATGTTGAGGATGAGCATGTGTATAAATCTCAAACGCTGGAAGAATATGAG
CGCGAGAAAGAGAAGTTCGAAGACCTCCATCGATCAATTCGCGCCTGCGATGACGTTCTT
AATTCAGTCGAGATAAACCTCACAAGCTTTCAAAACGACCTTGCTATGGTATCTGCGGAG
ATTGAAACTCTGCAAGCACGATCGACGGCTTTGAGTGTAAGGTTGGAAAATCGCAAAGTA
GTAGAGAACGGACTTGGGCCTATAGTGGAGGAGATCAGTGTCTCTCCAGCTGTCGTTAAA
AAAATTGTGGATGGAGCTATAGATGAAGCTTGGGTTCGAGCATTGGCGGAAGTTGAGAAA
CGATCAAAAGCAATGGATGCTAAATCGAAGGAGCAACGTACTATAAAGGGCGTGAACGAT
CTTAAGCCTTTACTGGAGAATCTAGTTTCCAAGGCATTGGAAAGAATCAGAGATTTCCTC
GTTGCTCAAGTGAAAGCATTGCGATCGCCCAATATAAATGCACAGATCATTCAACAACAG
CACTTTCTTCGCTATAAGGATTTATATGCATTCTTGCATAGACATCACCCAAAGTTGGCT
GAGGAGCTTGGTCAAGCATATATGAATACAATGCGATGGTACTTCCTTAATCAGTTCACG
AGGTATTTGAAGGCGTTGGAAAAGATCAAGCTTCATGTGTTGGACAGATACGATGTGCTC
GGATCAGATGACGGGTCTCGTAAGGCTACTCTTCTTTCAGGATCCAAACAGACAGGTCCA
CCGCACGACGCATTCAATCTAGGTCGACGAATCGACCTTCTCAAGACGCCAAACCAAACT
GCACTTCCCTCTTTCCTAGCCGAAGAAGACAAACAAACCCACTATATGGAATTTCCTTTC
CGTAACTTCAACCTCGCACTGATTGATAACGCTTCCGCCGAATACTCCTTTCTTACCTCT
TTCTTCTCTCCCTCTCTAAGCTACGCTACCATTTCCCGACACTTCAACTACATCTTCGAA
CCCACTTTTTCCCTCGGCCAATCTCTCACCAAATCCCTCATCCACGAGTCCCATGATTGT
CTCGGCCTCCTCCTATGTGTGCGCTTGAATCAACACTTTGCATTTTCCCTTCAACGCCGC
AAGATCCCCGCTGTAGATTCCTACATAAATGCAACATCCATGCTCCTCTGGCCACGCTTC
CAACTCACAATGGATATCCACTGCGAATCCGTCCGCACCCTAACATCCGCTCTCCCTACC
CGCAAACCCTCAGCTTCGGAACAAGCTAAACAATCTGCAGCTCCACACTTCATGACCCAA
CGTTTCGGTCAATTCCTACAGGGTATCTTAGAATTGAGTACGGAAGCGGGAGATGATGAA
CCTGTAGCGAGTAGTTTGGCAAGATTGAGAGGCGAGATGGAAGCATTTTTGACAAAGTGC
GCGGGGGTTATGCCGGATAAGAGGAAGAAGGAACGATTTTTGTTTAATAATTATTCGTTG
ATTTTGACAATTGTAGGGGACGTAGAGGGTAAATTAGCCGGGGAACAAAGGGCGCATTTT
GAGGAGCTGAAGAAAGCTTTTGGAGATGGTGTCTGA
>33f2599a-839d-4543-b030-0bdcf791a799 (mRNA) 1263 residues [BFAB_07:438467-440302 - strand] [cds] name=Bfab07g01190.1
ATGGAGTCTAATGAGCAGCCCATCAAGGAAGAGAAGTCCTCGGCAAGCTCCTCAAGAGCC
TCGTCCCGCTCCCCCTCACATTCCATCAAAGAGAAGCAACCACGAGAGCCTACTGAAAAG
GAAGTAAAGATCTTGGAGGCGTGCAAATGGAAGGATTTGGAGGCTATTAGAGAATTAGCA
ACATCGAAAGATGGCTTGATCTCAGATGAAGTTCGTCGTCAAGCATGGCCTATACTCCTC
GGTTGTGACGATAAACACGGCGACACAAAGGGCAACTTGACGAGCTGGAGGGAACTGCCA
AAGCATGGGGATGAGGATCAGGTTGCTCTGGATGTCAATCGGTCTTTCATATACTACCCA
AATGATCAAACCTCGAAAGAGATTGGCCATAGGAAGGAAGAACTTTCTGACCTCATTATT
GAAGTATTACGTTGCAATCCTTATCTCTGCTACTTTCAAGGTTACCACGATATCTGCCAA
GTACTCCTTCTTGTTCTCCCACCTGCTACTCGCACCCCCTCAGTTGCCCGGCTTTCTGCA
CTTCGAATTCGCGACTTTATGCTTCCAACTCTATCCCCAGCTCTCGCACAACTTCGCCTC
ATTCCATCCATCATAAATACTGTCTCTCCTGCTCTTTGCACTCACCTCTCGCAAACCCAA
CCATTCTTTGCTCTCTCGGGCACCCTTACAATGTACGCACATGATATACAAGAATATGGT
GATATTGCTCGACTTTTCGACGTTTTATTGGCACGAGAGGCTGTCTTTTCTGTTTACATG
TTTGCACAAATTGTCCTTTCACGCTCCGAAGAGCTTTTCGAGACACCTGCCGATGAACCG
GAAATGTTACATTCCATACTTTCGAAACTACCTAAACCTCTCGATCTCGAATCTCTCATT
TCCAACACTGTCAAATTATTTGAGGAGCATCCGCCTGAAACTTTGCCCTCCTGGAGATGG
ATATCTTCATCTAGCGTCCTTAAAACCGCTCGTTGGTCTGATCAGATCACAAAACAGAGC
CTTTCAGATGGCCAGAGGTATTTTGCGCAGCAAGTCAAGGAATTACAATGGGCTGCGAAG
CGTGATGAGCTGTTAAAGATGATGTGGAGATACAGACGGCCTGCTAAGGCTATTGGTGTT
GCAATTTTGGTCGGAATTTTCTCATATCATTGTTTGCCTAGGTCAAATGTAACAGGAAGA
CGCTGGACGTCTGCAGTTGGACTTTTCTGGGAATTAATGGGCGGGGGTTACAATGTCCAT
TAA
>c9f6564f-b43f-417b-928d-979973666344 (mRNA) 4104 residues [BFAB_07:440399-445823 + strand] [cds] name=Bfab07g01200.1
ATGGCCTTTCCTTTGCAAACACAAGTCTTGGTTGACGGACAATGGGTTACCAGGACTGTC
GATACCCATACACTGCTTCAACGCTACAATCAAATGGATGATAGAGAAGTTGATCATACC
ATGGAAACGATACGTCCTCCAGTCCGTGGAGTTCTGACTCAAACAATCGTTCCCAGCCCT
CTTGTACATTGGATTTTGCCCATTAGGATTCGTGGTCAGGAGTATAATGATGTAGCATAT
ATTGGAGACACATTTGTTGAGATTAGACGATTAGGGGTTGGCCCGCATCTATTCGAAGTC
ATCCGAAAGGATGACTTTGGTTCCAGAATTCGCAATGCGACTGTCCTAGGATCGCTCGAA
GACTACGAAAAGGAGCAAGTTTGTGTCAAAGAGGAGTACGAAGACAATGACATGATCAAC
TTTTCGACATCGTCAGACAGCCCATCATCTTCCAAGTCACTCTTGCCTCCTCAGACTCTA
GTACTACAACTCGAAACGGATACGTCTAGCGATTCAGTCTTTTTAACGCTGCATCAATCC
GGCGATGGATCATGGAAGTTTAAGTCTAGCAGGCGACGGTTATCCAGAGCGATGGATAAG
CTCCAGCCTGGAACACATTTATCAATTGACCCGAGTTCAAAATATATGGTCATAGGTTGT
TCTGAACAATGTTTTACAGTGCAGGCATTGAAGCCAAGAACGGAGTTGAGTCTTCAACAT
ATCAATGGAGAAGAACTCCAGTTTATCGAGTCTGAGAAGATCATTCTCTGTAAAGGAGCA
ATTTTGAAATTGGAATTCCTTCATCCCCCAGCTGGATCCGACAATGACGTTATTCTGCTA
CTGATCGTAACCGTGAATGGCAAGATAAAGATGCTCATATATTCATGGAGAGCTGGGGAT
CCTCTGTCAACCATTAAATCGCGAAATTCTAGAGGTAAAAAAGGCTATGCCTTGATGGAG
ATGCCCCTATTGCTCATACCTTTACGCTTTCAATCCGCGTTTGTTCTAGTAAACAAGAAT
TCCATGGTGGCTTACAAAGGCATCTTGGAGGGCGCACCTGAATGCATACCAATCGGAACC
TCTCCAAGGAAACCCCTCGACCTTTATCAAGGCTCAGACGTGCCCTTATGGGCAGCCTGG
GCAAAACCGACTCGTTTGCCCCACTATATAGCGGAATATGATGATATATATCTCGCTCGA
GAGGATGGATGGATCTGTCTATTGCAGGTGAATCACGATGGAGAAGATCTTGATCTTGCT
ATAACCGACGTTGGCGATATGCAATGCAATATCGGGAAAGCTTTTGCATGTGCAGACTAT
TCACTCGATCCGGATGTTCACCGCCATGGTGATGTGCTTGTTTCTGGGGGTGACGCTAGT
ATCGGAGGAACTTATTTGGTAACAGCTCGAGCACAACCTAATGTAAAAAAAGACACACAA
AACTGGTCACCAGCTATGGATCTTGTAGTAATTAGGAAAAATTCAAAACCTAACTCAGAC
ATCAATACTAGGATCCAAAGCTTTGTTCCTTCGCCAGATTCGATATTTGTTTGCAGCGGA
AAAGGAGCACTATCATCCATAACAGAATTGAGGTCTGGTATCGAAGCTATTCTTGGTCTG
GACCTTGAGTTTCATTCTGCGGTTACGAAAGCATGGGTTTTAAATTCAGAAACTTACTCA
GGTTCAGCTGGTGGTGACGATTGGGTATTGCTTTCACTCGAGGATCGATCAGCCATTTTA
CAAATTTCTCTAGACCGAACGAATGCAGAAGAACTTGACCCGAATCATATAACATTAGAT
CTGATGAGCCGGACTATTGCAATCAGCTTCTGTGGAAATCGTGCAATACAAGTAACAGAA
CGATCCATTGTTGTTCTCGACTCTGGCAATTGTACTATACTTAACGACTTAGATGTGATG
GGCTATCCTCAAGCCCCACCCATTTCAGCCTCATTCATTAATGATGCCATCATTTGCAAT
GGAAAGGTATTATTTACCACACATTACGAGGAAAGGCGTCTACTTCGCATACTCGATACC
GCCATTGATGAGAGTACATCGCCACCTACCATACTGTATTACCCCAAGACAGTTATTGAG
TGGACCCACGACGATGGAGAAGTAACGTGCATCGCGATGTATCTGCATCCACAAGATCAT
CAAGAGCTTATTATTACCGGTAAGAGGAAGGATGGGGAAATCTTCTTGATGTTCATTAGA
CGGGGAGAATTCCACTTACGCGTACCTACCACCTACGAAGGGTGTAGCTATGACCTTCGA
GCACTGGCCAGTATTCTTGTTATACCCTCGTCAACTCCTGACAGCTTTACGTTACTGTGC
GGAACACTCACTGGATTAGTTATTTCTTTGGAAATTTCTCAGGTCGGACAAGACTTCCAC
ATTCACAGGTCTTGCTGCGTTAGATTCGGAGGCAGTGTGGCAATTTTGACTCAAGCTGAA
CATTCGAGCTACTTGTTTGTGAATTGCGACGAGAAGATTTTTAAGATTAATCTAAGTACT
GTGAGTAGTGATGGAAACTCTCCAAGGAAGCAGACAACGAGAATGACTATCGGAGCGGAT
CAAATTTGGCTGGTAGATGCACTGAATACTACCCTACAACAGCCTAATATTAATTCCATA
TTACCACTCGAATCTGAATCACTAGCTGATACTGATCTTCTTCTGATATCATACAATCGG
CTTCTACTTGCCAGAATGGGGACGAAGCAGAAAACGGTACCTCGCCGCATCCCCATCAGA
GGAACACCATATCGAATCATCCATTCGGAAATTCGCAATGCGTTTGTCGTTGGCGCTTCT
ATAGACGGTCGAAGTACACTCTACTTTGTAGACCCTGAAACTGGCGAAGATTTATCTGAC
CCAAGGGTCAAGAAGAACGGGCCACAAACAAGTTTTGTAGCAGGATTGGGTCGCTTTGAT
GAGAAAATTCTTTGCATTTATGAGTGGCTGTATTGCCATGGGACTTCCATTTGGAATTTT
ATTGTCGTATGTACCAGTGGAGGTCGAGTCGTGATTGTATCAACTAACAGTGACGACACT
CCGTTGACACATTCTGGTCGAGCTAAGATATCGTTTTGGCAAACGACTCAATTTAAGAAT
TTCACTTCTGTGTATTCAGTTGTTGGAGACTCTGAAGGCTTGTACTACTGTGCGCAAAGC
GGCAACGAAGTCAAATTATACTACAGCACGCTGAATAGGGCAGAAAGAAAGTTTAATGAA
AACGTGGCAGAAGCCAAACTACTTTCACCAGCAACTTCACTGTCTTATGATGCTGGAAAG
ATATATGCTCTCACCAGACATCATTCTCTACAAATTCTAGAGGTCATCAAAACTGATGGA
ACTGTTCATCTTCGTCATACGCATACTGATCAGCTTCAACACGAATCTCTCCACCATATG
ATTGGCAGACCAAATCCTCTTGGAGGATCTGATAGCAGTCAAATTGATCTTGTCTCAGAC
AGGTCAAAATCTGTTATTGGTTTGTGGGCTAGTTCTGGCTTGAAAGTTGACACACTCGAT
ACTATATTTGAAGCACAACTACCGGCTTCAGTAATCCGATTTCGATCTGCAAATTGTCGT
CCTGTATGGGATGCAAGCTGGAAAGTTCATAAAGTTGGGGATTATATCGAGGACCCCACT
CGTCTTCATGGTCTTGGTGCGATCTTCAATGATGAAATGAATTCAGAGACCTTGGGATTA
GGAATTGATGGATCATTATACCATTTCACCACCCTTGATGTCCGAGCGTGGCAGTTTCTC
AAATATGTTGCCAATCTTGCAGGAAATTCTGGTCTTGTTGGAGGGCGACCATTGGATAAA
TCAGCCGACTTAGAACCAAATCAGACCCCTGCTAATATGCAAGTTGACGGTGATATTCTG
AAGAGGGTTTTAGAAAATCACAAACTCGAAGAAATGTTTGGGATTGGGCATCGTCAAACG
GATGAGAACAGAAGACAGTTTAAGCGATTTTGTATGCTACTCGAGAGTATGCATGGGGGA
AAATTGGAAACTAATCATGGCCCCAATGTCTATATAGAGCAGGCTTATGACGATTTAGGA
GTGTTTTTGAGACCAGTCATTTAA
>6a4685a1-5bb4-4763-ac6f-410df57a733f (mRNA) 3171 residues [BFAB_07:446186-450043 + strand] [cds] name=Bfab07g01210.1
ATGGCACCCAAGAAGAAGAACAACAAGAAGCAGAACGATGACTGGGAGGCGGAGTTAGGA
GAGACCGTTGAACCTGTCAAGGCAACGGAACCCGATGCCAACGCGGCAGAGGCTGATCCT
GAGGAGGAATTTCCTGCAGGAGGTCTCATGGCTATGATGCGCAAGAAGCAAAAGAAAGGC
AAAAAGGGAAAGCAAATGGAAGATTTTGTTGAGGGAGAGGACCCACCAGCCGCCGATGAG
CAACCTCAGGATGATTTCGCCGACAAAGCTCCCGTTGAAGCTTCAATAGACGATGAATTT
GCCTTGCCAGAGAAGAAGGGAAAGGGAAAGAATGCGCAAGCTAAGTCTGCAAAGGATGAC
GATGCAGGAGATGACGATATGGGTGCGGATGGAAAAATGCTCACAAAAGCGCAAAAAGAA
AAGTTAAAGAAGGAGAGAGAAAAGCAGAGGAAAAAGGAACAAGCGGCTTTGAAAAAGAAG
ACCACTCCAGGTGGAAAATCTGCTGAACCTGAGAAGCCAGTTGAGGAAGAGAAACCCGTC
GAGGTCGCACCAACTCCTGCTCCAGGTGGAAAAGGCAAAAAGATTCCAGCTGCTCTTGCA
AAGCTACAAAAACAACAAGAGGAATTGAGAAAGCGGGAGGCTGAAAGAGCTGCTGCCATT
GCAGCCGAGAAGGCTCGAATCGAAGAAGAGGAACGCCGAGAAGCTGAAGAAGAGAAGAAG
CGTGAAGAGGCCAGAGCCTTGCGAAAACAAAAGGAGAAGGAGAAGATTGAACAACAAAAG
AGAGAGGGTACCTATCTCACCAAGGCTCAACGAGAAGAGAAATTGCGAAATGAAATGAAA
CTAAAGCAAATGATCGATGCCGGTGTAAAGGTTGGAGGTGGAGAAGGCGGAGAAAAGAAA
AAGGTTGTTTATGGCAACAAAAAGAAGGGTGGAAAGAAGAATCCCGCTGAAATCAAGGCG
GACGAAGAGAAAGCCCTTGCCGAAGCCGCCGAACGCGCAAAGAAGGAAGCCGAGAGAATT
GCTGCAGAGGCTGCAGCTAAAGCAGAAAAAGAAGCTGCTGAACAAGCCGCCAAGCAAAGC
AAAGACGAGAGTGAGCTAGAAGACTGGGAGGCAGCTGCTGACGAAGAAGATGAGGATGTC
AAGGATAGCTGGGATGCGGATTCTGACGAAGAAGGGGAGAAGAAGGCTGTCTCTTCCTTG
CCGGTTAGGAAGAAGGAGGAAGAAGATTCTGAATCTGAATCTGATTCAGAAGACGACGAT
TCTTCCGAAGACGAAGAAGCCACAGCGAGAGAATTGGCTGAACTCAAAAGAAAGAACGAA
GCCGCGGAAAGAAAACGAAAGGCACACGAAGCAGCATTGGCGGCTAGATCAAAGGATAAC
TTGCGATCCCCTATTTGCTGTATTCTTGGACACGTCGATACTGGAAAAACGAAGCTCTTG
GACAAGATTCGACAAACAAACGTGCAGGAAGGAGAAGCTGGAGGTATTACGCAACAAATT
GGTGCGACTTACTTCCCAGTCGAGGCTATCAGGAAGAAGATTGCAGTAGTGAACAGAGAT
GAGAGCTTCGATCTCAAGGTTCCTGGTCTCTTGGTAATCGATACACCTGGTCACGAGTCT
TTCTCTAATTTGCGTTCTCGTGGTTCATCCCTTTGTAACATTGCCATTCTTGTCGTTGAT
ATTATGCACGGTCTTGAGCCTCAGACTTTGGAATCGATGAAACTTCTTCGGGATAGAAAG
ACACCTTTCATTGTTGCTCTCAACAAAATTGATCGTCTATATGGTTGGAAGAAGGTTGAT
AACAACGGATTCCAAGAGAGTTTGGCACTTCAAAACAAGGGTGTACAAAACGAATTCGCA
AAGCGTCTCGCAGATACAAAAGTTGCTTTTGCCGAACAAGGATTTAACGCTGAAGTCTTC
TACGAGAACAAATCTATGGCCAAGAATGTTTCCTTGGTTCCTACATCAGCTCACACTGGT
GAGGGTATTCCAGATATGCTCAAGTTGATTCTTCAACTCACCCAAGAGCGTATGGTCGGT
GCTTTAATGTACCTTTCAGAAGTTCAATGTACTGTCCTCGAAGTCAAGGCTATCGAAGGT
TTCGGTATGACTATCGATGTCATTCTATCCAACGGTATCCTTCGAGAAGGTGATCGTATT
GTAGTATGTGGTGTAGATGGAGCTATTACCACAAATATTCGAGCACTCTTGACACCTGCC
GAGATGAAAGAACTTCGTCTTAAATCCCAATATGTCCACAACAAGGAGGTCAAGGCTGCT
CTCGGTGTCAAGATCTCTGCACCTGGTCTCGAAGGCGCTATTGCAGGTTCAAGATTGATG
GTTGTTGGCCCTGACGATGACGAGTCAGATGTCGAGGCTGAAGTTGAGTCCGATCTCGGT
GCACTCTTTAGCCGTGTTGAGAAATCTGGACGTGGTGTCACTGTTCAAGCATCTACTCTT
GGATCTTTGGAAGCTCTTCTTGATTTCTTGAAGGTATCTAAGATTCCTGTTGCCAACGTC
GGCATTGGTCCAGTCTTCAGGAGAGATGTAATGAATTGTGGTACCATGCTTGAGAAGCAA
AAGGAATACGCAGTCATGTTGTGTTTCGATGTTAAGATTGACAAGGAGGCTCAACAATAC
GCGGACGATCAAGGCATCAAGATCTTTACTGCAGACATTATCTATCATCTTTTCGATTCC
TTCACCAAGCACATGCAGGTTATTGCTGAGGCAAAGAAGGAAGCTTCCAAGCTTTTGGCT
GTCTTCCCTTGCGTTCTTAAGCCCGTAGCTGTCTTCAACAAAACCGGCCCTATTGTTATT
GGTGTTGATGTTGTCGAAGGAAATCTTAGATTGCACACCCCTATAGCTGCTGTCAAACAA
AACTCGGTTACTGGTAGCAAAGAGATCGTGGGTATTGGAAGAGTCACATCCATTGAACGT
GATCACAAGCAACTCGAAAAGTGCAAGAGGGGAGAACCTTCCGTTGCTATCAAAATCGAA
ATGGGCAGTTCACAACCGACATATGGTAGACACTTGGAGGAGGCTGATACATTGTACTCG
TTGATTAGCAGAAAGAGTATCGATACCCTGAAGGAGTTCTACAGAGATGAAGTCAAGAAG
GATGAGTGGGCACTGATTTTGAAGTTGAAGCCACTTTTCGATATTTCTTGA
>5c23aa35-da57-462f-98fb-00c64496d6d4 (mRNA) 3063 residues [BFAB_07:450323-453860 + strand] [cds] name=Bfab07g01220.1
ATGGGTAGCAAAAGGAAGCGTTCAGCTCAAGATGCTGCAGTTGCAGCTCCTGCTGCCAAA
AAGCAACAAAAAACATCCAAGCCAGCGACCAAGAAGCCCGTGGAAACTCCTGTTCTCGAT
ACATCTCCATTTGTCAACAACCCAAGAGGGGACGATTTGAAGCGTGAAGTCAGTCTTTAC
GATATGCTTAGTAGTGAGGATGATTCGCAACGACTTGATGCCGCCAATGCTATTGTGTCT
GGATTGTTAGGCGGAGATGGAGTCGAAGAATCGACATTACAAAAGCACTTGGAGAGAAGA
TTGTTTCGGGGACTTGCAAGTGGCAGGAAGGGTGCGCGATTGGGCTTCAGCATTGTACTT
TCGGAGTTGTTGGCTCAACTTTTTGGTTCGGCGAATCTAAGTGCGACAAAATATCCTGGA
TTAACCTTCGATAACGTCTTCGAATTTTTAATCCTCAAAACAAAACCCGAGGGCGATCTG
AGCGGACAGGAACAGAAAGATCATGCTCTTGGATTGTTATTTGGACTGCAATGCTTTGTC
AGGTCCAAGATTCTTTTCTCAATCGATGGGAAATGGGAATTGGTTCTTGATAAGCTATTG
GATTTATCCAGCAAAAAATCCTGGACTCGGGAGGAATGCGGTTGGGTAATCATGGAAGCT
TTGGAGCAGATGAACCAAGATCAGGCAGAATCTACTTTGAAGAAATTGTGCGATGTTGGA
TTGGGACTCTCACCAGAAGGTGTTGGTATCTGGCTCAGAGCAAGGGACAAGTTTCCGAAA
ATGAAGTTTCCAAGCAATCCTTGGGGGCAGAGTGGCAACCCATTGGAGCATCTCAACTCC
CTTGCAAAAGCACTCAAGGAGAGTTCTTCTAGCGAGGAAACTTCGAGCAAAGGACAACAA
GCCAAGCAAACTGGAACATGGAATGCGAAGTTACATTTTGTTTGGGACATTGTCTTAAGT
CAATATGTTAAAGCAGCTAATAACAAGGCCAAGAACATTATGTCTGAATTCGACAAATTC
TGGAAGGTCACTGTTGATGAAAATCTGTTTTCTGCATCTGCATCAAGAGAGCGTAAATTC
TGGGGCTTCCTGGTCTTTCAAAGAATGATTCAAAGCCATATTTCGTGTACAAAACTCATC
ACTAGTATCTTCAGTCACAACCTCGTCCGTTGCCTCATCAATCATGTTCAGGAAAAAGAT
CGTTTCCTCAATCGGGCCGCCGACAAGTCGCTAAAGGTTCTTACACACGCAGTGGAAGAG
AATCCTGAAGCATTGGTTGTTGTCCTTCAAGGATTGATTGACGGCAACGGTGCATACAGT
TTCGACCGGGTCACAAAGACAAAAACGATAGAAAAACTGTTGAGTATGGTTGATGACACA
AATGGCGAGGCCGTTCTCGATGTTCTCACTTCTCCTGTCTTGCTTGTACCAAGCTCGGAA
ACCAATGACGCCGAAAAACGTCGACAAATGTTCGGAGACTATGTTTTAACCGCAATTCGA
CATGTTGATCTCACAGAAGCGTCACAAAACTCAAGTTGGATCAAAACCGCTGCGTTACCT
CAACTTGCCTCGTTAGCATACTCGAATAACTCAGAAGCCAAACCTCCCATTTCCGAAGGA
ACCCGTACATTAATCAGAAACCGGTTGACATCGGCATTTACTCATCTATTGTCTAACATG
GATGGCTATCATTACCCCTGCGATTTAGTTATTTCATGCACTCCTGATGCAGTCGCCATG
GATGGACTCATCACTGGTGCTAAAGATGCCGCATTCACTACATTACAGAAACTCATGAAG
AAAGCAAAGAAAGGAGGGAAGGATAAGGCAACTTTCCAAACTTTGTCATTGTTATATGCT
TTAGTAATCTTCCAATTGTATAATGGAGACGTTGAAGCTGTGTCCATCTTGGATGAGTTG
AAGTTATGTTACGATAACTTAATCAAACACAAATCGATAGAGGACTCGGAAGTTGCACCT
TTCGAGGTTCTTGTGGAGCTCTTATTGTCATTCCTTTCTAGGCCATCCGCTCTTCTCCGA
AAAGTCACTCAACATGTCTTCACTGCATTCATGGGTGAGATGACCGAAGGTGGATTAAAA
CTGATGACAGATGTACTGGAAACTAGCGAAAACATGAGAGGGCAACAGGAAATGTTTGAT
GAGAACCCAGATGATGAGGACGCGATGGATGTTGATGAAGAAGATGACGAAATGGATTCG
GATGTCGAAGTCGTTGACATGAATGGCGAGGAAGGTCACTTAAATGCACATCTTGCAGAG
GAAGAGGAAGAGAGCGATGAGGAAGATAATGAAGAGGAATCGGAAGACGATGGAGATGAG
GGAGATGATGAAGCTAACAAAGAGCTCAATGACGCATTAGCAAAGATCCTCGGCACATCA
TCATTAGATCAAAATGAAGAAGACGAAGACGGCGATAGCGACTCCGATATGACTGATTCG
GGGATGGATGCTCTAACTCCAAAACTAGAGGAGGTTCTCGGAAGAATGCAAAAGAAGGGG
CCAAGTAAGAAACAAGAGCAAAAGGACGCCAAGGAAAATATGGTCAACTTCAAAAGCAGA
GTTTTGGATCTTCTTGATATATATGCCAAGAAGCAAGCGTCTGATCCCTTGGCTGCAGAA
ATTCTATTACCTTTGTTACGATTGATCCGTTCTACCAAAGCCAAACACTTGAGTGATAAG
GCATTCTCAATAATTCAAGCTTTCGCAAAGTCCAAGTCGAAGGCATCGTCTTCGGAAGCC
GAAGTAGAGATTAATGTTAAGGCACAAATCGCATTGATCAAGGGTTTTCATGAAGAAGTA
CTCAAGGACCAGTCTAAGGTCTTCGCCAAAGCTGCCAGCATAGCTAGTTTATCTTTGGCC
TCTGGTATATATAGAGCGGACAAGAGTCAGTTTGAGAAGATTGGAAAGGTTTACTTGCAA
ACGATGACAAAATGCGATGTCGAAGGTGTGAAGATTCAGGCTAGTTTTGTAAGCGATTGG
GTTAATTGGTGGCAAAGTCATATTGCCCAAGCTACGGCAGGGAGTGCTGCGAAGGAGGAG
TAG
>b78005f6-b764-4d19-9db1-95b68b8d7d38 (mRNA) 2190 residues [BFAB_07:453936-457559 + strand] [cds] name=Bfab07g01230.1
ATGGCTAGCGACAACCTGGAACTACCTGGTCTCTCCGAACCCTTTGAAGAGAATGAAACC
ACAACCCTCTGTGAGCTTTGCAATAGCATAATTTCTCACCATACAGGAATTGGAAGTGAA
ACTTCGGTTACGCCAGAGTTCAAATTGTCCGAGGAAGAAACACCTACCATGTTGTTGATT
TTGAACGGTGCACAAGGAGGCTGTCGTCTATGCGCCGTGGCTTGGAGAGTATTTAGGGAT
GGGGGGACTTATCAGAACTTCTGTTCAAACAACGATACTAATGCATTGTCCTTGAATGAT
ATTGCAGAGCTTTTCGTTATAAGCTATTTGCATCTTGAACGTTCGAAAGACATTTCTCTA
GGCCTTTACAAGCTGTCCTACAAAATAGCCTATGAGAAGACAAATTGGGGAGGTAGTGGC
ATCCTGGTGCTAGTTCTAGACACATTCGAGGGTTCCCAAGACTTCCATAAAGCGTCAGAG
TCTCACACAGATACCAATTATCTTTCTGAAGAGAGGTGGAGGAAATTCTGTTATTCATCA
ATCAGAATGTGTCAAAGAACTCACGAAATATGCAATTCTGCACCAATATCTGACAAGGCT
TCGCGTTGCTTACCCACACGTCTCATTGACGTCAAAAAAGATCCTCCAAAGTTAATCTTG
TCATCCAGCGCAGAACCTGCAAGTTCATACGCGGTTCTAAGTCACTGCTGGGGCAGAGCA
CCGATCCTTACTTTGACGACGAAGAATTTGGAAGCTTTTCAACAAGGATTGCCCATTTCT
CAGTTAAGTAAAACCTTTCGAGATACCGTCGATGTAGGAAAGAGACTATTACGAGACTTC
AATGTAAGATATATTTGGATTGATAGTCTATGCATCATTCAGGATTCTAAATCAGATTGG
GAGAATGAAGCACCAAAAATGTCCCAGGTTTATGGGAACGCCTTTTGCTGCATCGCAGCC
ACTTCTGCCACCGATGGATCGAAGGGTCTTTTTTCCCCAAGGAACTCCATGGTGGAAGAA
GTAATTCGTATAAATATTGATAGATCAAGATATCCATATCTGCCAAGCCCAGTAAGCATA
ACAATACTCAACAAGGACAAGTGGCTTCAGTTCATTCGAGAGGCACCCTTAAACCAGCGT
GGCTGGGTTGTGCAAGAAAGGGCTCTTACCAAAAGAGCATTGCAGTTTTTTGATGGTGAA
GTAATGTGGAAATGTCAACAAAGAATGGCATCAGAGACATTTTCTGCCATAAAATCTGGC
TTAAAGATACCCGATGATCGCCTTCTATTTCCTCAGTCTCTTACAGCAAACTTCAATTTC
CGGGAATTCTGGAATCAACTCTTACGGATGTATAGCAAGACTATCCTTACGTATCCAGAT
GACATACTCATGCCAATAGCTGGTGTGGCACGCCAATTTGGGGAATACCTACCGACCAAC
AACAAGGCATATCTCGCCGGAATGTGGTCATTCGAACTTGAGAGGCAATTGGGATGGCGA
ACAACCTCACCTGGCTCTAAATTCGATCTCGATCGTCGAGGATCCCCTAGCTCTAATGTG
GCGCCATCTTGGAGTTGGGCTTCATCAACAGGCAGGTTAATCTCGACTGCATGGAAAAAC
AGCTCAAATGAAGATAGAGTTTCCTCTGTGCCCTGGTATGACTGGACTCCGGCAGAATAC
AAACGTCACATGATTACGGATCTAAGTCAGGTTCAACCTCCTCAATTCACCATAATCGAT
GTCGGAACCACTCTTTCTACCAAAGACCCATTCGGATCCGTTACTTCGGGCTTTCTTCAA
CTTCGTGGTCAGTTGAAGGTTGGGCGTCACTCTTTTACATTATCTAAAGATAATCTAGCA
ACCTGGAATAATAAAAATCTTCACTACATCCAGGTACTCGGCAGATCCTACCTGTCCCCG
GTGGTTTTTGATCGTTTGCAGTCTGATGACGAGCTAAGAGAGATTAGAGAAGGGATGTTG
TTCGTTTTCCCCTTGCATTTCAAAACTATCCGGAATTCCCGTGCTCTTATTCTGAAGCCA
AGCAGTGTTCGAAAAAGTTTAGTGAGGGTGGGCTGTCTATTGCAGATTCCAAACATTATT
GACGTTGATTCGGAGAGTGATAAATTGATTGGGGAGGAATTTTATGAGGAATACCATGGG
AATGGAGAATATACTATACGTATTATATGA
>32968abf-0d12-441d-94d2-cc5abddf9e5d (mRNA) 828 residues [BFAB_07:458162-459550 + strand] [cds] name=Bfab07g01240.1
ATGTTCTCCCCTCCAATAATGACATCCAGAACGTTCCTTTTCCTTCAAGTTGTCTTCTCC
CTGTACATTTCCTCTGTCTATTCATTTCCCTTTTCTCTCCTCAAAACAAACCTCATCGAC
CCCCGCGATCTCTCCGCCGTAGCCAGCGAGCTCGGCACCCTAGGGAGCGATCTCCAGAAC
TCCAGCACTCTGAAAACCTTCCTCGGCGATAGAGGAAATGTGATTACGCAGAACGATGTG
CTGGATAGCAATGGAAGTTGTGCTACGATGACTGTGTTATTCGCGCGGGGAACGGGGGAA
GTCGGTAACGTAGGAATCTTAACCGGTCCTCCATTTTTCACAGCCCTAGCCGCATATATG
AATGAAACCGGAAGCATGTCGATCCAAGGCGTAGATTATTCCGCGAGCGTCTCCGGCTTT
CTCGCTGGTGGTGATCCCGCCGGTGCAAAAACTATGGCCGATCTAATAAATAATACTCTA
ACCAGCTGCCCCGATACGCATCTCACTGTGTCCGGCTACTCTCAAGGAGCTCAACTTGTT
CATCTCGCTATGAGTTCGCTGCCCACTACCACAACATCACGCGTTAGATCCGTCGTGATG
TTCGGAGATCCAAAGAATGGTACTGCGTTAGCTGGTATCGATTCGAGTAAAGTCATGACG
ATTTGTGATCCTAAAGATGATATTTGTAAAGGCGGGGATGCCATATTACCAGCCCATCTG
GAATATAGTGCAAATGCCGGAACTGCTGCCAAATTTGCATTGAGTGGGCTGGCGGATGTG
GGTATCACGAGTGCGAGGAAAGTCAGTGGAGTTGATGGGATATCTTGA
>dc9a2d2e-9655-458c-8ead-6436e94558ed (mRNA) 3276 residues [BFAB_07:459333-463118 - strand] [cds] name=Bfab07g01250.1
ATGCTCGAGCGCACGGCGGGATGTCTTGAAACAGGCAGTCTGCGGCGCCTTCTACCAGGA
CCAAAACACTTAGCCAAAAGTCGTCGCGCACTTCATTCGGGATTCTGGACCCACGGTGCA
ATTGAGCTTGAGCTCTCGCCATTATGGCAGCTCATGTTACAAGGGCCTGATGTTACTGAG
GGCTCGAACTCACGATTGCCCAATGATGGAACTGTTAGCGAAAGTCCTGGTATTTTTTTG
GACTTTCTCTATCCAACCAGTACCCTCAAATTTCTACGGCAATATCCAGGGTTGGGAGTT
GATAGACAAGATGGGAAGAGGACTAGACTGGGATTGAGAGGTTCTGGCTATCGGCTCTAC
ACATCTTCTGCTAAGAAACCTTCGTTGGCCTTGGTTCCGGTAGATGCAGAGACGAAAGAA
TCCGCCGAGATTAAGAAGCGTCCTATTATACACGAGGCGCCTGACGATGCAGCAACTATT
GCAACTGTTCTAGGAATAACAACATCATCCCGATACGAAGAGGTATGGCGAAAATATCGA
CGTCTGGAATTTGGGAGTTGGGCCGAGGAGAGAATTCGAATTCAAGTGTTGGAATATATG
GCGGCTTCAAATCGGATAGTAGATGCGGAGAGGGCCACTTCATTATTCGAGAGATCTGAT
GCTCGTCGAGAGAAACCAGAAATATACGAGATCGTGATTCGTACTTATTTGAGACTGCAG
AATTTCTCGAGAGCGAATGAACTTTACCACTACTCCCTCGAAAAGTTCAACACGACTGCT
GGAGGATCAGATATCATGTTACATCTCATGACAAATGGTTTGTGGTCGCAAGCCTTCACT
CTTTGGACAGAAGTGCAGCTGCACGGTAGTCTTACCGGACCACGCTATGATATGTTTAAA
AGTTTACACCACATAGAAGATCTTCCTAACAAAGCTCTACTTTTGGCAAAGTATGTCAAC
AAGTCGCTTCACCATCCCTCGGAAGTTGAAACTCTACCATCTGAAGCCCTCACGAAATTT
GCTACGGCAGTGATCACCTCAGCTCTACTAAGTGCCAAACACTTTTCATATGCCACGTTT
TGGCCCCTTTTAAGACATATTCAGGACTGGGAAACTGAGTCTGTTCGTCTTTATACACAG
GCAACCAACATGCTACTGTCTCTTGGTCAACTAAAAGCAGCCGTCGTTCTTTACAGACAG
GCCCGAGAAAGCCCAATGAAAAACCTCTTACTTCCAAGATCCATGTTACAATCCGTACTG
CAGATTTTCTTCAAAAATCATGATTTGATTGGAATTCAAGAAGTGTTTGCAGACATATTT
CGATTCAATCAGACTTTAGATCGAGCGTCGCACAGGAGATGTATGGATGAATTTGCACGC
TATGGAGATGCTGACACTGTTCATGCCTTGTTTGAACAGTTTGCAGAAAAGTATATGCGA
TTAGAAAGTGAATCTGCAACAACTCCTAATCCTTTGGCATCGGCCGATGACATGGCCCCT
CTCTTGCATGTTCACGCAAGGCGAGGAGAACCCAAAATAGTCCTCGACGTGTTTAAAAGC
ATCCGAAAAAAATATCGTCTCAAGCCGACCATAACATGTTGCAACATCCTTATCAGTGCT
TATGCACAGGTTGGTCAAGTCGATGATGCTTTGGAGACTTTTGAGTCTACTGTCACAAAA
CGAAAACTTCAACCTGATGACTATACTTTCGGAACACTGATGGGAATGTGTGCCTCACGT
GGTGATCTCGAAAACACCATTGAGCTCTATCGGGTGTCTGCTACTTATGGAGTTGAAAAG
AGCGCAGCCATGGTTAGCACTCTCGTGACTGCCTATCTGGCAGGTGATCGATTGGAAGAA
GCTGAAACCATTTGCGAAGAGGCCATGAATTTAAAGTTCTCGGATTCACGAACCCGCATG
TGGAATTCTTTGCTTGTTGCTTGGGCATTGCGTTATGACCTCATTAACGTCAATCGAATC
CTTCAAAGAATGTCTAAGCTTAACATAGAGCATGATGGTGATACTTATGCGGCTCTCATG
CAAGCGCTGGCTATGGTGAAACAACCCGAACGTGCCTGGCAGATTTTAGCAGAAGTTATG
CCAGAAGCTGGTATACCTGCGACTAGTCTTCATTATGCGATTGTTATGGGTGGCTATCTT
GCTGCTAAACGCTACAAGGAAGTTTTTGTAATCCAAGATCGAATGCTCGAGCAAAAAAGA
ATGAAAACTGCAAGCACAAAATTCTTGGAGTTGAGAGCGGCAATTCATGCAGCTAGGGTC
ACTTGGGGAGATCCACATGGCGCCATGGAGATTTTTGAACAGGTTGTCCAAACAATGAAT
CCTCGCGACATTAGTGACAAAGTCAGGAAAGGTATCCAGCACGAGCCACTTGACATTGCT
TTTCCTACCACGTTTTTCGGGTATATTGTATTTGTACTTTCCAAGAATATGGAGATAACA
TCCGCCAAGGATATGCATCAACGTTTCTTAAGATTGCTACCTACCGATAGAAGAGACACA
CAACCCGGGAATATTACCACTGCTTTGATGTCATTAAAACTTCAAGAGTTAGATTATGAC
GCCGTGGAGGATCTGTGGCAGCAGTTCGTGTCTGATACCCGCAAGCGAGCTCAATCTCTT
CGACTTTCAAAATTACTCTCTCGTACCAATGATTCTGAAAAGGCAGAAGTGGCTGAAAGT
GATGTCGACCATGCATCTGGAGAGGGCGCTCTGGAAGATACCAAAGCCAATCTGCAAGAG
AACAAGGAGCCAATTAAGGCAGCACATAGACTTGCTCTGACAAAAGCCTTGCACTTTTAC
ATGATGGCTCTTGTAAGGCAAGGAAAAATCAACGTCATGATACGAACTGTCAATGAGATT
ACGGATATGGGATTTCAATTAAGCAATCAGAATTGGAACGAATATATTCAACATCTTACC
AAGTTTCGACATTTCAAACTAGCATTTAAGATATGCGAAACGGTCCTTATGGATCATTGG
AAAGGATGGGCGAAGTTAAGATTTTTAACAAGCGAGAAAAACAGATTACCGTTAGAAATT
CGGAGGAAGGGAAAGCTATTGACGTCTCTACGTCCAGAATACCGCACATTCTTGTACCTA
ACCAAAGGCTTTCTCAATATACAGGCTATGGCTGCGGAATCGAGGGCTAATCGACTTTTG
CTCAATGATTTGGAGCATGATTGTTCAAGGACACTGAATGCAATCAAAACCATGGTTAGA
ACAGGAGATTCTCTAGAACGAGAAATTTTGGGGTGA
>61d613f6-06b9-4951-a784-b05e604dac19 (mRNA) 1857 residues [BFAB_07:463360-465971 + strand] [cds] name=Bfab07g01260.1
ATGGAAATAACCAAATTCGTCCTCGAAGGACGAGACGAGGCGAAGCTATATGGCGATTCT
TCTGCTTATCGAACTCGACTTTCAAATCGCATTCACACCTTGAGAAAGAAGCTTGGAATT
ACGACGAAACCCCGCGCAAAGTACTCGAACAAGCCTGTAACTGCGGAGGACATTAGTCAA
AGCCATGATTATATCCATCTCCTATTGCTTACCTCCGAAAGAGCGTGGGCGCATGCTATG
TCAATGAAAGAGATACACACTGTTGATACAAAAGGGATAACTGGTTCAACTCGATCGCAC
ATCGTTTCTCGATTACACAAAGCCACGATATATGCCAATGATCTTTTCCGATTACTATCC
GATAAATCAACTACCAATGCGAACGATGTCGATGTATTGGAAGCTAGAGCATACGCTGCT
GCTCTCGCTGGAGCAATGGAATTCGAAAAGCAAAGTTGGGAGGCTTGTGTGAAGAGATAC
GCGGAGGCTAGGATTATATACACTGCACTTTCTAAGGTCACCAAAGCGGACATCTTCAAG
GATCTCTTGGCCGACCCTGTTGATCCCAGTATACGATACGGGGCTTATAAGATGGGACTG
CCTCGAACACTAGCTATATCTGCCATTGCACGCAAGAATTTCCCTTCGGATCAAGAGTTG
ACAGAGCAGGTGGAAAAGTTAGACCCCGACTGTCTGAAAGACGAAGCGACAATATCAAAA
GCTGAAAGTCTGGAATCGGGCGAGACAATCAAAACTATTGTCTGGCGATCACGGACAGTG
GATTTAGAAGATGCGGCAATAGCTACTGCCCTTGGATCAGTAAAGGCAGCGTCATCAAAA
CTGTCTAATACTCTTTCCTCGTCTACTCCTAAGGATAGGGGCTCCGCTTATGACGATATT
CTAATCGCTAGTCAAGAAGTAGTAGACGCTACAAAGCATGCTATTGACGAGCTAGTTTCG
GAGGGTGTTGGACAAAGTGATAAGCGAATGCAAAGCCTATTAGTGACTAGGACCGCTGTT
AGCTATGATATGATTGGTTGGCGTATAGGCAGAAACAGAGTCATGGTAGGGGAGCAAGAC
GGGATTATCGATTACGTTCAATCATTTCCCGCAGGGAAGGTCAAGAAATCAACCAAGGAT
GAGCCTATAGGGCGTAAACTTGCCAAATTACGCGAGAAGGTTGTTCTCTATGACGCAATC
CTGCAAAGTGTTGAGTCAATTAAAGAGCTCCCAGGTGTTGCAGCAGATTCTAGTCTACAG
GAAGAGCTAGATGCAAAATATAGCTATTTCCAAGCTCTTAAATGTTTGATAATAGCCCGC
TCTCACGCAATTCTTTCGAATCCCAAAAATTCACTAGCTCTCTTGAACCGCGCAACAGAA
AAATGCACAGCTGCCCATTCAAAACTATCTTCGTCAATGGACACCACGACTACAGATACT
CCGCCTAACCTAACTGTCACTCCCTCTGAAACTGAAAACCTCCTCGCTTATCTTCAATGC
GAACTTCAACGCTACCGCGCCTTGGTCGAAATATCTAACCTCACCTCCACTATCCCGAAA
CCTGGCGATGAAAATGTACAACAAATTCCCCTCGTTGAGCGTCTCCATGAGTACCCATCC
GATGGAGTTGTTGACCTGAAGAATCTCGTAAACTATCCTCCAAAATTGGAGGTTGTACCC
GTCAAACCACTATTCTTTGATTCGGCGTGGAACTATATTGATTATCCAGGAAGAACAACG
GAGAAAGCTGCAGAAAAGGCTGCAGTGGAGGTGCAAGCGAAGGAGCCAGAGCCAGAGGAG
CCACAGGAGCAGCAACAACAGCAGCAGAAGAAAGGATGGTTTGGTTTCGGCAGATAG
>71f973ff-53a1-4d7c-874f-c2ce14180442 (mRNA) 2763 residues [BFAB_07:465976-469102 - strand] [cds] name=Bfab07g01270.1
ATGGATTTGATATCTTATACGGAAAAGAGAATCTCAATGGCTAGTGCTCAATCCATGAAT
GAACACTCTTCCGAGGCTGATGCGGAGATATCGAAAATGATTCCTCAATTGCCACAGACT
CCGCCAGATTCCAATGAGAACAGCTCGGATGAGCTGGGTTCTTTATCAAGTCATTCTAGT
TCAACCTCATTGTCATTGCAGCGATACACTCTTCCACCTCCGACAAATCCACCAACAGAA
ATTCTCAAGGAAGATTTGAAAACACCGGACAATCAAGTGCCCCGGGACCCTCGACTTATT
CGGCTGACTGGAATTCATCCCTTCAATGTCGAACCTCCTTTAAGCGCTTTATATGACGAA
GGATTTCTCACATCGCCTGAATTGTTCTATGTCCGGAATCACGGAGCTGTACCTCATGTT
GAGGACTCATCAATACCCGACTGGGAATTTTCTGTCGAAGGATTGGTCAAAAAACCCTTT
ACTCTTACACTCAAAGATCTCCTGAGAGAATACGAACAAATCACCGTACCCATCACACTT
GTCTGCGCCGGAAATCGTCGTAAAGAACAGAACCAAGTCCGGAAATCTAAAGGTTTCTCA
TGGGGTGCTGCAGGCGTGTCAACGGCACTATGGACAGGCGTACCAATGTACGAACTGATT
AGAAAAGCGATGCCAATGAGAGGTGCAAAGTATGTTTGTATGGAGGGTGCCGATAAGCTT
CCTAACGGCTACTATGGAACCTCCTTAAAGCTTAACTGGGTTATGGACCCAAATAGAGGA
ATCATGGTAGCCCACAAGATGAACGGGGAAATGCTTCGACCCGATCATGGTAAACCTTTA
CGAGCTGTTGTTCCCGGGCAAATCGGTGGCCGCAGCGTGAAATGGCTGAAAAAGATTATT
GTTACCGCAGCTCCTAGCGATAACTGGTACCATATCTACGATAACCGAGTCCTTCCAACT
ATGATTAGCCCAGAGCAGAGTGCCAATGAACCCAAGTGGTGGACGGATGAGAGATATGCC
ATCTATGATCTAAGTACAAACAGCGCCACCGCATACCCAGAACATGAAGAGCGACTATCT
TTGGTGAGCGGACAACAAACATATCGTGCGAAGGGCTATGCGTATGGTGGTGGTGGGCGA
CGCGTTACGAGAGTCGAGGTAACACTTGACAAAGGAAAATCATGGGCGTTAGCTGATATA
CGATACCACGAAGACGATTATCGAGACCGTGCCTACGAGAATGAAACGTTATTCGGAGGT
AAATTAGATATGGAATGGAGAGAAACGTGTTTCACATGGTGTTTTTGGGAGGTTGATTTG
GATGTCCAAGATCTCGCAATGTCGGGAGATATCATGGTAAGAGCCATGGACGAGAGTATG
AATGTTCAACCGAGGGATATGTACTGGAGTGTGCTTGGCATGATGAATAACCCATGGTAT
CGAGTGACCATTACCAAAGAAGGTGATTATCTACATTTTGAACATCCCACACAACCAGCG
CTTATGCCAGGAGGATGGATGGAAAGAGTAAAAGCCGCCGGCGGGAATCTCGCCAATGGA
TTCTGGGGCGAGAAAATGGGCACTGGAGATGAATCTGTCGCGTTGGTCGAAGTCAAGCAA
GAGATAAAAATGACAAAGGACGATGTGAAGCGTGAAATCTCCATCGAGGAATTACGTCAA
CATGACAATGAAAAGGAACCTTGGTTTGTCCTCAACGGCGAAGTCTACGATGGAGCCCCA
TTTCTGGAAGGTCACCCGGGAGGCGCAACAAGTATTACCGGAGCCGCAGGCCAAGACTCC
ACCGACGAATTCATGGCCATCCATTCCGAAACGGCAAAAGCAATGATGCCCGCCTACCAC
ATCGGTACTCTTTCCCCCTCCGCCCTCACTTCCCTCCTCAACCCCGAACCCCTATCTTCC
TCATCCCAATCTCTCCGTCCCATCTTCCTCCAACCCAAAAGCTGGCAAAAAGCCGTCCTC
ACCGCTAAAAAAGTTATCTCGAGCGATACGCGCATCTTTTCTTTTACTCTCGATCATGCG
GAGCAAGTCATCGGGTTACCGGTGGGTCAACATCTCATGATGCGCTTACGGGATCCCGTG
ACCAGGGAAGCCATCATACGATCCTACACGCCTCTTTCGCTCGGGACCGACAAAGGGGTC
TTAGATATCCTGATCAAGATCTATCTGAAAAATGAAAAGGGGCCCGGAGGAAAAATGACA
ATGGCGCTGGAAAGTATCCCCGTTGGTCATTCCATTGATTTCAAAGGACCGATTGGCAAA
TTCGAGTACGTGGCAAAGGGAGAGTGTGTAATTGGGGGCAAAAAGAGGAGGGTAAAGCGA
TTCGTGATGATTTGTGGAGGAAGCGGCGTTACGCCTATCTTCTCGGTATTGAGAGCGGTG
CTTAATGAGGAGGAGGTGGGAGATGCACCGAAATGCATCGTGCTAGATGGGAACAGGAGA
GAGGAGGATATTTTGTGCAGAGAAGAGTTGGATGATCTGGTAAAGGGGAACGAGCAGAGA
TGTAGATTAGTGCATGCTTTGAGTCAGCCGACGGAGGAATGGAAAGGATTACGAGGGAGA
TTGGGAAAAGAGGTTTTGGAGAAAGAGGTAGGGAGGTTTGAGATGGATATGGATGGTGAG
GGGAATGGGTATAGGGATGGTGAGCAATTGGTTTTGATCTGTGGACCGGAAGCGTTGGAG
AAGAGTGTGCATGGGATATTGTCGGATTTGGGATGGAAGGATCAAGATATACTTTTCTTT
TGA
>4289c04f-fac5-4870-a81c-5fde25b7163a (mRNA) 3480 residues [BFAB_07:471425-476637 + strand] [cds] name=Bfab07g01280.1
ATGGATCGCAGGAGAAAGCGCGAACTGCGCGACTTAAACACTCGCGCTTGGAATGGCGAG
AAAGACATTTATGCCGTGAACAAGTCACTGGATTCATCGCTCAAGAAGAACACGGCCTTT
ATCAAGCGCCTTCGAACCGCAATTTCAGCTGCGACCCTCAGCACCTTCCTACAAGAAATT
CGAACTCTTAGCCTACACAAATATCTCTCGGAAATTATATCGGCTTGTTATGAAGGGCTT
TGCAGACTCAAGTCGCCGGGAGAGGTTGAGGCTGGTGTAGAAATTGTCAGCGCATTACAT
CAGCGTTTTGGGCCGGCAGAATTTACGGAATTTCTGGGATGGTTGGTAGGAAAGGGATTA
GCTACACCGGAAAAGTCATTATTGAAGAGTCTCGCAGCCGAAGCCCGGGAGAAGGAAGAA
AAGGAGCGGATTGTACGACAGAGAGTACTTTTGAGAGTTGTCACCGAGTTGTGGTTGGTG
GGAGTTTTGAGAACGTTGGACGATGTTGCTCGACCAGATGACGCATCTCACGGCAAGGAA
TCTCTTTCAGGATCGTCGAACAAGGCACCAGATACTAAAGCGAAACCAAACGGAGTTGGA
AAAGGAGGAGGTGCGGAACCATTTCCTCTCGAAGTTCTCAAGGACCTTCTGGGCCATGAT
AGGGATCATGCGAACTTGCCCCTACTGGTGATCTTTGTAAAGGCGTTTGGTTGGGACATA
CTCGGTGTCAGAGAAGCTGGATACGAGGGCAGAAAGACTGTAGAGGAAGACGGCACCACG
AAGACAACGCTTGATGCCACCGAGGGCGAAGGTGAGAATGAGGATGGCGACGAGAACGAT
TCGGTGGAAGAGACGTCACCCTCAGTGGACTCAACCGAAGATGCCCCTCTAGCTTCACTC
GAACTCCAGGAGCGCTTCCGCAACATCCTTAACCGCTATTTTGAAGATGTCAAGGCACAT
ATCATTCGTGATCAGAAGGCTATTGCTAAACAGGCCCGCAAAGACTCAGAAGCATACGTC
AAATCTGGCCAATTGTTTGAAGATCGCCAGGCAAATTATGAAAAGGCTCTCAAAGCGCAA
GAACGACTTGTATCGAACGCTCAAGTCCTCGCGGAATCCATTGGCGCGGAAATGCCAGAT
CTTAAAGACTCCGATGACTCTTCGGCCTTGGGCAATGGAGGCATTGGGCTTGTGAAGGCT
GGCGATTATCTGAGAGGAGAAGGCGAGGGCGCAGGTATCTGGGAGGACGAAGATGAGCGG
AGATTCTATGAAAATCTAGTAGATCTTAAAGGAAAGGTCCCGGGTATGCTCCTCGAAGAT
GGTAAAAAGAAGAAAACAGATACGGATGAGCAAGTGGGCAAAAAGGTCGATACTTCCGAG
ATCATTCCCGCAGAGACCACTGCGCCCACCGCGAAGACCACAGATGACGACCAATCCACG
GCCATTGCCAACAAAACCATTGGCGCCCAGGTCGATGCATTACTTGCTAGACTCCCTGAT
CTTACAAACAAAGACCTAATTGACGAGGCTGCAATTGACTTCTGTTTCTTGAACTCCAAA
GCTTCTCGCAACCGTTTGATCAAAGCTGTGCAAGAGGTTCCTAAGGGTCGTAGTGATCTT
CTGCCATCATACTCAAGACTAGTAGCAACACTGGGGAAGTACATGCCTGATATCATAAAA
GGCTTGGTTGATCACCTTGATCAAGAATTCCGCAGCCTTCAACGTCGCAAGGAAAAAGAA
TTCTTAGGTCAAGCCCGACTAGGAAACATTCGCTACTTGGCTGAGCTGACCAAGTTTGGC
GTGGTTCCTGAGCATGTTATATTCCATTGCTTGAAAGTCAGTCTTGACGACTTCTCACGG
ATGAATATTGAGATCATATGCAACTTGCTAGAAAATTGTGGTCGATACTTACTTCGCAAT
CCAGACATGTCCCCTCGAATGACATCCTTCTTGGAAACACTAAAGCGCAAGAAGTCGGTC
CAACATATTGGCCAACAGGAGCGCATGCTGATCGAAAATGCCGTTTACTATGTAGACCCA
CCTTTGCGACCAACGATCCAGCAAAAGGAGAGAACGCCAACTGATTTATTCATTCGCAAG
CTTGTCTATTCTGATATGACTACACGAAACTATGCTAGGATTATCAGGTCGATTCGAAGA
CTTCACTGGGAAGAATCAGAGGTTGTCACTATTCTCGAAAAAGTCCTTTCCAAACCCGGA
AAGGTAAAGTATGGTAACATTTATCTTTTGGCAATTGTTACAAGTGCTCTCTTCCGTTAT
CACCAAGGGTTTGTAATCACAGTCATTGACAATGTATTGGAATACATTATCGTTGGTTTG
GAGCAAAATGATTTTAAGTTCAACCAACGTCGGATTGCAGAAGCCAAGTACCTTGGGGAG
CTGTACAACTTTCGAATGGTAGATCATCCTGTAATATTCGACACAATGTACCGTATCTTG
ACATTTGGTCATGGTGGACCGCCTGTCCCTGGTCGCACCAATCCTTTCGATATGCCTGAT
GACTTTTTCAGAATTCGTCTTGTAGCAATTTTATTAGAAAGCTGCGGAGTTTTCTTTAGT
CGTGGCGCGGCGGGAAAGAAACTTGATTACTTCTTGTCATTTTTCCAGTACTACATTTAT
ACGAAAGATCCTCTACCCATGGACATTGAATTTATCGTCAGTGATGTTTATGCAGCCACC
AGACCTCAATGGAAGCTTGCCTCAAATATCGAAGAAGCTAGTCGTGCGTTCCAATTGGCC
ATGGCCCAGGATCAAAAGACTGCTGGCATTGAGAAGGTTGTTGAACCAGAAGAGCCTGAT
AGTGAGGCATCATCAGACGAAGGAGATGCAGGCATTCCGGAAGGAGATATCGACGATGCT
TCCCTCGATTCCGAAGAAGAAACGGAAATTGATGCTAATGCCGACAACTTAACATCACCA
ACAGGGAACGAATCAGAAGAAGAAAACTTCAAAGTCACTCGCCAGGAAGAAGAAATTGAT
CCTGAGGATGAAGCCGATTTCGAACGTGAGTATGCTAAAATGATGGCTGAGAGTCTAGAT
TCCAGAAAATTTGAACGAAAAGCGACATTCGATGTTCCACTTCCCATGAGACGCAAAGAC
CGTGAAGTCGCAACCTCGAGCGAATTGCCTAGTGAGACTACCTCAGGAAATGGTCCATCC
AGTGGTACAATGGCATTCTCACTTTTAACAAAGCGTGGCAATCGACAACAGACTCGAACG
GTAGCCCTCCCTTCAGACTCAAATTTCGCAATCGCTATGAAATCACAACAAGCTGCCGAG
CGCGAGGAGCAACAACGCATCAAGAATCTAGTTCTGAATTATGATCTCAACGATGGCGAA
GAACAAGATGGTTTCGATAAAAATGCCACTACAACGTTCTCCAGATCTGATAAGTCTGGT
AGTAACCGTAGTGGACAGAGGTCAAGAAAACTACAGCTTAGTGATGTTGATTGGACATGA
>75ec9326-271b-49a2-96ef-dbb5aa2dc029 (mRNA) 2241 residues [BFAB_07:476890-479830 - strand] [cds] name=Bfab07g01290.1
ATGTCTGTCGTCGGTGTAGATTTCGGTACTCTTAACACAGTCATCGCGGTCGCAAGAAAC
CGTGGTGTCGATGTCATCACAAACGAAGTTTCGAATCGTGCAACTCCCTCCCTCGTAGGT
TTCGGACCCAAAGCCAGATACCTCGGTGAACCAGCGAAGACACAAGAAATCTCCAACCTC
AAGAACACTGTTGGATCCCTCAAGAGATTGGCAGGCAGATCGTTAAAGGACCCAGATGTC
GCTTTAGAACAAGATTATGTCTCGGCTCCTCTCGTCGACCTTAACGGTCAAGTTGGTGCG
GAAGTCACATATTTGGGCAAGAAGGAAAGATACACTGCTACTCAACTCGTGGCTATGTAC
CTGAGCAAGATCAAACAAACCGCTTCTGTTGAGTTGAAGCTTCCAGTATCAGATATGGTC
ATGAGCGTACCAGCATGGTTCACCGATGTTCAACGAAGAAGTTTGATGGATGCTGCTGAG
ATTGCCGGTGTCAAGCTCCTCCGTTTAATGAACGATACCACAGCCGCTGCATTGGGTTGG
GGTATTACCAAATTGGATCTCCCAACCCCAGAAGAGAAACCCCGTCGTGTGGCCTTCATC
GATATTGGTCACTCCAACTATACCGCCTCGATTGTGGAATTCAGAAAGGGTGAACTCACC
GTCAAGTCAACTGCTTACGATAGACATTTCGGTGGACGAGACTTCGACAAGGCTTTGGTT
GAGCATTTCGCCGCAGAGTTCAAGGAGAAGTACAAGATCGATATCAAGTCCAACCCTAAG
GCTATGGTCCGTGTTGCTGCTGGTGCCGAGAAGTTGAAGAAGATCTTGTCCGCCAACGCC
ATGGCTCCTCTCAACATTGAATCTTTGATGAACGACGTTGATGTTAGCGCCATGTTGAAG
CGTGAGGAGCTCGAGGCACTTGTTGAGCCACTTCTCAGTCGGGCCCACGTTCCTCTGGAG
CAAGCTTTGGCCGATGCGGGGTTGAAGGCTGAGGATATCGACATTGTTGAACTTGTCGGT
GGTTGCACACGTGTCCCAGCTCTCAAGGAGCGCATCCAACAATTCTTCGGAAAGAACCTT
TCCTTCACCCTCAACCAAGATGAGGCTATCGCGAGAGGATGTGCTTTCAGCTGCGCCATT
CTCTCCCCAGTTTTCCGTGTCCGCGACTTCGCCATTCACGATATCGTCAACTACCCAATC
GAATTCACATGGGAGAAATCCCCAGATATCCCAGATGAGGATACTAGCCTCACCGTTTTC
AACAGAGGTGGAATTATGCCATCAACCAAGATCCTTACTTTCTACAGAAAGGAGCCATTT
AACTTGGAGGCCAAATATGCCAAGCCAGAATTACTACCCGGCACAATGAACCCATGGATC
GGAAGATTCACCGTGAAGAACGTTAAGGCTGACTCCAAGGATGATTTCATGATCTGTAAA
TTGAAGGCCCGTCTCAATTTACATGGTATCTTGAACGTTGAACAAGGTTACTATGTTGAG
GATATGGAGGTTGAGGAGCCAATCCCAGAGAAGGATGGTGAGAAGAAGGATGATGTGAGT
AACCAAATTTCTAATAATATTCAACCCCCTTTCGAAGACGAGCCTATCGCAAAACGTCCC
CGTTTACAGGGACATAATAAACTAACGCACACCACCAAGGCTATGGACACCGATGATAAG
CCAAAGACCAGAAAGGTCAAGAAGCAAGTCCGAAAGGGCGATCTTCCAATTGTTTCTGGT
ACCGCTTCCCTCGACACCGCCGCCATTGCCACTGCTTCCGAACAAGAAAACACCATGAAC
ATGGAAGACAAATTGGTCGCCGATACCGAGGAGAAGAAGAACGAACTCGAGACTTACATC
TACGAAATGAGAAGCAAGATTGATGACCAATATGCCGAGTTCGCAAGTGATGAGGAGAAG
GAGAAGTTGAAGGCTAAGCTTGAGGCTAGCGAGGACTGGCTCTACGATGAAGGTGAAGAT
GCAACCAAGGCTGTCTACGTAGCAAAGATGGACGACATCCGCATGGTAGCAGGACCTATT
GCTCAACGCTACTTTGACAAGGTTGAAGCTGAGCGTGAGGAAGTCAGGAAACAAGAAGAG
GCTGAATTACAGAGGAAGAGAGATATGGCCGAAGCTGCTAAACAAGCTGCAATGGCCATG
GAGGCAGCAGAGAGTGGAGCAAATGGTGACGTGGTCATGACGGATGCCGAGAATGTTGAG
CCAGAGGTTGAGGAGAAGTAA
>49577df6-d0f5-44f6-bfef-64ca39764da0 (mRNA) 2328 residues [BFAB_07:480758-484695 - strand] [cds] name=Bfab07g01300.1
ATGGTTCAATACGATACTTCACCATGGCCGGTGAGAGATATCGTCTATACCGCTATAATG
GGTTCAGTCATGCTTGCCGCATTTCTCGAGTGGTTTCTCTGGCTGGCGGCGTTCATGTAT
TGTCTATTCAAAGTTTTCCAAAAGGCCGAGCACTGGTCCGTCCGGGTTTTGTCAATAATA
GTGGCGATTATTTTCTTTCTCTTGAGAGCAATTTACCTGCCCATTATGGTTGTCACACTC
CCTTTACCAGAAGGAGTCACTCAATACTTCCCCAAAGAAATGGTCAGCTTTCTTCAATGG
TTCGGATTTTGGTCATTCGCGGCTCTTCTTACGATTCCATGGCTCTTTTGCGTCTACCAA
ATTGTAACAAATTCCTTGGGACGAAAAAAGCGTATAAAGCAAGTGTTGGATGAGCACTCA
GCACCAAAGGTTGTGATTGTCATGCCATGTTACAAGGAAGAACCAGATATTTTGGTGACG
GCTATCGATTCAATTGTGGATTGCGATTACCCTCCTTCTTGTATTCACGTCTTTCTTTCC
TTCGATGGCGATCAAGAGGATGAATTATACCTTAAGACGATTGAAGCACTAGGAGTTCCG
TTGTCTCTAGATTCCTACCCAAAGAGTATCGACGTCACCTACCGAACTGCCCGGATTACA
GTCTCTCGATTTCCACACGGCGGAAAACGACATTGTCAGAAAGCCACATTCAAGTTGATC
GACAAAGTTTATACCGAATACCTGAAGCGCAATGACAATCTGTTCATTCTTTTTATCGAC
TCCGATTGTATTTTGGATCGTGTTTGTCTCCAGAACTTCATGTACGATATGGAGCTGAGC
CCGGGGAACACCAGAGACATGCTGGCAATGACAGGTGTGATTACTTCGACTACAAAGAAA
CACAGTCTTATTACTCTGCTCCAAGATATGGAATATATTCACGGCCAACTCTTTGAGCGA
ACGGTCGAGTCAGGTTGTGGTTCCGTCACGTGCTTGCCGGGAGCTTTAACGATGCTACGA
TTTTCTGCCTTTCGCCGTATGGCCAAGTACTATTTTGCTGACAAGGCTGAGCAATGCGAT
GATCTTTTCGATTACGGTAAATGCCATTTGGGAGAGGATCGATGGCTCACCCATCTTTTC
ATGATTGGAGCAAAGAAGAGGTTTCAGATTCAAATGTGTACCTCTGCTTTCTGCAAGACC
GAAGCTGTTCAAACTTACCAATCTCTGATTAAGCAGCGTCGTCGTTGGTTCCTGGGATTT
ATCACCAATGAAGTTTGTATGTTGACTGACATCAGAATCTGGAAGAGATATCCAATCCTG
GCCGTCGTGCGATTTATGCAGAACACGATCCGAACAACAGCTCTACTATTCTTCATTATG
GTACTTTCAATTGTCACAACTACAAAGAAAGTTCAAGATCTCCCAGTTGGATTTATTGGT
ATATCACTCGGCCTCAATTGGCTGATGATGATCTACTTTGGTGCTAAACTCCGTCGTTTC
AAGATTTGGCTCTACCCATTGATGTTCATCATCAATCCTTTTTTCAACTGGTATTACATG
GTTTATGGCATCTTCACTTGCGGACAACGAACTTGGGGTGGACCTCGAGCAGATGCTGGA
GCTGCCGATTCGACCACAAGTCCACAACAAGTTATCGAAGCAGCAGAGGAGGCTGGAGAT
GAGCTTAATGTTATTCCAGAAACATTCAAACCCGCTGCCGAAGCTCGAAACAACCAAATC
GTTCGCCGCCCAACGCTTCCTTTATTGCCTCCGACTCGTCTCGAAGGTCGTTTCGCAGCT
GCGGAGAGACTCCCAGGTGGATGGTATGAACATGTCAATGACTCTCTTACTAGCGTTGCT
GTCGGACGCGTTGCACCTTCTGGGCGAAACCCCACGGGATCTAGAGAATCTATCGATAGT
TACGTGTCAGGGTTTACCGGTACAAATTCAGTGTATATGCCAAGACGAGTGGAGAGTATT
ATGGGAGAAGAGGATCGAAAGAAGTACGAGATTGCTCAAGCCAATCAAAAGGCACCAGCT
GGAGCATACTACAACCAGGGATACGTTTATGAAATTCCTGATGGACCTGAGGCCAAGGGT
AGCTTCCAAGATTCAGTGGAATCTTTGGCGTCCATGGATGGAACGACATCAAATTCTTTG
GCAGTTCCTCAAGCATCTTCGTACCGAAATGGACGAAGTCCTCTGGGTCGTTTGTCTTTG
ATTCGTTCCAATTCGAGGGATGACCCAATTGAGATGGACGACCAACGATCGGATAGAGAT
CACCATTCTGACAGTTCAAACTCTCCCGAACCGAAACCAAAACGTTGA
>7562af49-e1a5-49e7-8910-4e32cb917855 (mRNA) 2433 residues [BFAB_07:489929-493275 - strand] [cds] name=Bfab07g01310.1
ATGCCCATGTTTCAAGATGACCTCGGTGACGGCCGAGAGATATTGCCCGTTCAAACCCCC
AAATTGACGCCTGTTTCAATGACACCACCAGAAAGAAGAACGATCGTGAGGAAAGATAGT
GAAGAAAGCATTCGGACGGAATTATGTGAAGGCCCTGTGCCAGATACCCCCGAGGGATCA
AAAAGCATACCGGCTTTGGGTTTGGATACAAGCTTTAAGAATTCATACAGCGGAACATCG
GAGAGAGAGGATCTTATTGAAAGGTTGAAAAGGGGCGAAAATTCGAGTTGGTTCCCGAAT
TTAAATTTGGAATCCCTCCTTCATGGCCAAAGCCCAGAAACTCCCATTCGAAAGACCTCG
AATCATTCGAATTCGTCTTCCCTGTTGCCATCTCCCGATATATCCAATACTATCAGACCC
TCGTCGGTAGACAAACCTAGCTTACAAGCTGGTCTAGAGATTGAACGGCCAAGGTCCGCA
TTACACAGTGGAAATTTTACTGAAGGTCCGCGGCGAACTATATCTGGTAGTCCTGGGCAG
GATATGAAGAGATTTGGCACAGTAAATTTACCATGGCTAGCTACATCTCCACCGCGAAAT
TTTACTCCCTTTCAACTCGATCCTCGGTTTCCATCAGTAGATAGAGTCGAAGCAGAGTTA
AGAACAAGAACTCGTGCACCATCGTTATCCTCTTCATACTCTTCTAGCTTTGTATTGAAA
GCGCCAACAAGCCCTCTAGTACAATCAGAAAGTAACGACGATTTAGATTATACGTCAAAT
TTAAATCCAATAGACATTTCTCCCGGGACACCTACAACTAACTCAAGACGTCATACTCTA
CAGGCTTCACATTCAATATATTCAAATAATTCTATACCGGGATCCACTGCTTTCAACAAA
CCTTTCCCGAGTCTTAGGAGAGACAATACATATCCTTACCAAGCTCATCAACCTCGGAGA
TCTCTCGCCTCCAATACAATGCCACACTCGGCATCTTCTCCGCAAACACCCACCTTCCTG
CGGTCAAGGAGACCTTCATTTTCTGATTTATCACCTCTGCATGCTTCGATGGTGGGATCC
TACGAAGAGAGTATCCTTCGGGGTCGAATGTCTACTACCCCCTCTAAACCGCTCGATTTC
GTTGCTCAAATAGGGGTACTGGGGTTCGGAAAGTGCAAATCGAGTCTCAAATGTCCACCT
CATGTGACCTTGTCATTTCCGGCAGTATTTTATGCCTATGAATCCACAAGTCACGGTCGG
AGAGGGAAATCAGATGATGGGCCTAGTCCATATGTTGGCTGTATTGATTTAGAGAATGGA
TTGCCAAGCCCTGAGAAGGCAAAAGACAATCAAAAGAGGAGGAGACATGCTACGCTTGAC
CGAATACATATGGACGATCTCGACACCAACCCATCAAGTTTAGGACAAGTCTCAGAACAA
GAAATTCGTAGAGCAGGAAAGCAAAAACGTCGATCCACTTCTCCACGAGAACCCCCAGGT
GGTAGCTATCGTATCCCCGAAAAAGGGCAATTGCAAATCATCATTAAAAATCCTAACAAA
ACAGCTGTCAAATTATTCCTCGTCCCATATGATCTCACTGGAATGGAACCCGGTACCAAA
ACATTCATCCGTCAGCGTAGCTACTCTGCTGGACCCATTCTTGACTCGGCCCTCTCATCT
TCACCTCATCGATCTGCACCCATTATTGATCCACTCGCCGAAAGACCTACCCTCCGCTAT
CTCGTTCATATCCATATTTGCTCACCAGCTCGAGGTCGCTACTATCTTTACAAAAGCATA
CGAGTCGTCTTTGCCAATCGTGTTCCAGATGGTAAAGAAAAGCTTCATAACGAAATCACT
TTTCCAGAACCGAGATTCACTACTTATAAAGCAATTCGCGATTCGAGTCTCGGGGGTGCA
GGTGCGGCATTGGCGGCGGAAAAAGCATTTCGGAGGAGAAGTTCTGGATTTCCTCTGAGT
GGAAATAAGAATTTTGATTTTGGAGGTGATGACGGTGCATCAAGTAGGGGAGTGGTGAAT
CCTATTCCTTTTCAATTTTCTGCGAAGAGGGGTATGATAGGTGGAGATAATGATATTGGA
CCATTGGATTTAGGGGCAAGGGAATCATTGAATTTGGAACATAACGTGAGACCGGGTACG
GCGTTTGAAGAGGTGAAAATGGGTAATATGGGGACTGGGATAGGGACGGGATTATATGAG
AAGTTGAAAAAAGGCGATTTGGGGTATGGTAATGATGGGTTCTCTCCAACGAGAACTAAC
ACTCCCGATAGGGAGGGGAGACAATTTCCCGCAGAAGGATTGTTGGCAACGAGATTGAGG
GAATTAGGTGTAGGGCTCTCGATGGGGATGGCCGATGGAAATGACAAAGAAAGAGCGGAT
CTTGAAAGTGAGAAGCTAGGGGGAAATTCATAG
>f918aceb-84bf-4fa9-a52c-2e403fa2228e (mRNA) 672 residues [BFAB_07:493453-494722 + strand] [cds] name=Bfab07g01320.1
ATGGCTCCTACCAAGCGCCCCTGGGAAGAAGATCACCCATCACGCTCAACTACCAAGAAA
CCTCGCCACGGCTTCAAAGTCGGCCCCGACAATTTGCCTGATGGAACTTGGCGTCGAAAG
GTCATTGCCATTAAGAAGGATTTGATTCACAAGGCGAAAGTCAAGAAGTCGTATGCGAAA
CTAAAGGCGAGAGAGCCGTTAAAGGATGAAAGGAATATATATGCCGATGACGAGGACCAA
GCGGACGAGGCAGCAAAAAATGAGGAAAGGGAGGATGCTGTCGAAGGAGAGGAATCAGTG
GAGCTACACCCGCAGAGAAAAGCTATGCTTGATGAGCCCGAAGCCGATACTGCAGCCAAA
ACTGTTCCACGTTACTCGAATAATTCTGAAGATGCGAAGGACAGGAAGAGGGAAAGAGGT
GAAAGGAGAGCAGCAAAGCCGGCATATTTTGCAAAAGAATTAGCATTTGCCGAGAAGCAA
AAGGCAGAACAGCAGGCGCGAAGAGAAGAATTTGAGAGGAAAGAAAGGGAGAAGAAGGCT
AAAATTGAGGAGAGGGAGAGATTCAGGCGGCAGATGGCAAAGGCTAGAAGTGGAGGAAAG
AATGGACAAAGAAAATTAGGAAGGGAGAGTCAGGTTTTATTGGAGAAGGTCAAGAGAGTT
GTTGGTAATTGA
>d510374d-0aa9-4608-a548-7dbb0cfa07de (mRNA) 2304 residues [BFAB_07:494639-497534 - strand] [cds] name=Bfab07g01330.1
ATGGAACAACATAGAGGTACCAATTCGTTCGGGAAACGCGACAATGATGAATCACCAAGG
CGAGAGGAATATCGGTTCAGGCCACAAAGAGAGATGGCGCAAAATCATGAAGTCTCGAGA
AGAGATGCAAACTCGTACGCTCCAAGATACAATCACAATCAAATGAGAAGAAAAATGGAT
AGCTATAGACCAGGTAGACCACACTGGCCTCGGGTTCCACATCGCAATCACGTAGCTAGA
AACTCTTCGTATCCCGGTCCTTCTACGCATGACACCACTACTCAGGAATCACGAAGTTCA
CCCTTCGAAACCGCGAGGACTTCACTTAGCCGTGCTGCAGGAGCTGCAAATACATCAGAG
GAGTCGGAGTCGGCTCCACTGGTCTCACATCATGCAGAAGCCGTCCCTTCTACGAAGGAT
AAAGAAACTCCTTCATCGAGAGATGAGGATGAGTACGAGCTCATTTGTGAGCATGCCGGA
GGTCCACTACGCCGATTCACCAAGAAAATGTGTGATGTCATCACTGAAACGATTACAGAA
CATTGCCATGACGATACCATGAGCGCAATAGATATTCTCAAACAAGCGTGCATAAATCTT
TCGGTAAAAACCGGTACTACGCTCGAAGTGCACGACTGTTGGCTGTATTGGCGCAAGAGG
GGTATGAGAACCAATATCGCTCAGTGGTGGCCTGATAGTCTAGATGATGTCGATAAGGAG
GTGGCAGATTATAGGCGATTGAGAAGTGCAAAGTCCAATAGAGCGAGAGCAGCATATGCA
GCTAGACTCGCTACAGTACCAGTCGCCTCCTCTAAGACCGCTGGGACTACCGAGGCTTTC
GCGTCATCAGACCCAGTCGAGGAACCTAAAGATTGGCCTCGAGAAGAGAAACTTCTTCTT
TTTGCAAAGCTTAAAGCTAAGAGACCTATTCAACATCGTCTACATACGAACATGCTCTGG
ATAATGGTTGGGCGAGCGATGAGAAGAGAGGGATATACCAGAGGAAGGGATGAGTACCGT
GAGTGGTTTGAGAAGTATGGTCGCGCGTATTTCGACTACGACGAAACCCGCTATTTTTCA
CAACCTGGTAATCCTCATGTCGGCACTGGCAGAATGCAAAATGGGATTATGACACCAGAA
GACTCCCCAGTCGGCGATGCTCGCAGAAGAAGAAGAAATTCGAATTCTGATGGCGTCAGG
GCAAGACTTCGTGGTACCATGGCACCAATGTCTCCCAGCGTTCCCAAAACGCCCAAACCC
AACAAGCCACGGATGTCAACCACGGTACTACATGATATGAAAAGCTGGTTGGGTGGCTAT
AGAAATGTAGACAAAACAGCAAAAGTCGCGGAGGAATTCCCTCTGCCATTAATTAAGCCA
TCCGAAGGCGAGCGTTTCGGACCTTTCACTACTGAGAAGCAGGAAAATTATGAACCTCCT
TCATCCGCAGCGGGCTGCCTGCCCGGAAGCCTGTTGTTCGTTACCGAAGATGAGGCGCAA
AGCGAGCGAGATCTCTTCCCGTCAGCTCTTGATGCGACTAATTCTCACTCGTCACCAGCG
CCTGCACTAACCGATGCTCCATCCACGATATCAGATGAGACAGGTACGCCTAAGGAGAGA
GTGGAATCAATTGGGGAAATCAAGGCAGGAGAAACGATGGCCCCCGATGAGAAAATCGAA
CCGGGAGAGACAATTCCAGAAGATGAGAATGATGCACCATCATTACAGCCCAACGAGACA
AACAGCACACAGGATGGCATACAGTGTACCTCTGACGAGTGGGGATTCGCCACTCCGCCT
TTCATGCGACCAAGTGAAGTGGATATGGCGTGGATAGATGAGTACAGCGATTTCGAGTCC
AGCCACATCTCAGCAACCACAAATGCGAGCGATCCTTCTACATCTGCAGGACATCCATCC
TTTGGCAATTCCCTAACATCAAACGAGACAATAGAAGAAGTCCCATTGACCCAACCGAGC
ACAAGTGATGACGAGTCCAAAAACAACACCAGCTCGGAATCCCAGGCGCAATTGTTGCGA
GAACAGCAGGAGCGAACTGATGTCGAAATTTCCAACTTGCGAGCGAGTTATCTCAGAGTC
AAGGAAGCGGAAGAGGACGAGGAGAAGAAACTAGATGACACTGCGCAGGAATTAGATATC
ATGGTCTTGAGGAGAGCCGAGCAGCTGAAAAGCCAGACTGCATATCTAGCCGAGATGCAA
AGAATCGAGGCGGAACTTGAGGAAAAGAAAAAGGCCAAGCAAGCTTTGAGCATTGCTCTG
GAAGAACTCGAGTTTTTTGGATAG
>786cbbda-c0e8-41e3-9b1d-4eaf4d095eda (mRNA) 1527 residues [BFAB_07:498658-501004 - strand] [cds] name=Bfab07g01340.1
ATGGTAAAGGGTAAAAGATGGCAATCTGAAGAGGTTGCCAAGCTGAGGGAGATCTGTAGC
CGTCAGGCATATATTAGCATACGCGGATCGAATAATCCATTCTGGGAGATGGTTGCCGGT
GAGATGGAAACATATGGATGGAATCGTCAAGCACATGCCATTTATTTTAAGTGGATGCGT
CTGAATCAACCACCTCGACCGAAATCGTCAAAGAAAAATTCATTTGGTTATGGGGATTCC
AGTGATACGGAGGGCGAAGAAAGAGGCGAAGGGGAAATTGAAGACTATGAGGGAGAGACT
GACACTAAAAGTGACGTTCTGTTTCAAATTAGGTCCGGAGACGATGCTTCTAAACCTTGG
GCGAAAGGAAGCAACTGGTCGGATGAGGAGAGTGAGATTGCATACCAATGCATCAAAACC
CAGCGAGATAAGGAGAAAGAACTCAAACTTGAACCCATCACGGCGGATCAAATTTGGCAT
ATGGTGGCAGAGGCTTTAGAACAGCATCAGATCTACCGAAAAATTCCAAACATTTACACC
TACTGGAAAAATAAGGGGCGACAAAAGTACAACTTCGATGAAAGAACTGCAGATGCGATT
GAGAAATCCTCGCATGGAATACCTCGAGTTCGTGGAGGGAAGGCTGCACAAAATTCTCCG
GGACATACAGCGTCTAAAGTTCATACTTGGCTTTCGATGCCTGAATCCTCAACCGAAGAC
CATTTACAGAACAATTCGAAGGCTGAGATGGCTATGGAAAATCTACAAGTCCTGATTTCA
CCTTGGCAGCATGATCTGCTGATGATTGAGTATAAAAAATACAATCGTCTAGACAACCCC
GTGATGAACCAGTTGACGGAGGATACTGGTTTGAGCAGAGAACAGATCAAGTTGTGGTAT
AAATATCAGAGAGCTATGGATGCGAAAGAAGCAAACCTTCAGAAGGAAGTTGAGCTACAG
ACCGGAGAACTATCCACTCCTATTCTTGATGAACCGGAACTGCAAAGCACAGGATTAAAG
CGTTATCGCGTGTCAGACATTGGTTATTATCATCAAGCAGAGGAGGAACCAGCTAAAAGA
GTCCGCCACAGTCTGGGCCCGGAGATTCTGATGAAAGATCATGGAGGAATTCTGGTTGAC
TCAAAATCTCAGGACAAACCCGAGATTTTCGGTCGCCACTCAATTGTACCAGAACAGAAT
GAACTTTCAACAAATGATGTTGCAATATCAACTGTCGAAGTCCAACAACCTTCTCTCGAA
TCTGCAACGCAAAGAAAAATTCCGGACATCACATCTAATGTGACGAGCGTGATGAGAGAA
AATCGGGAATTGGAACAACAAAAAGTACACGCGGCCGAGGAGAAATATAGAGAATTGGAA
CTCGCTATCATTGCTCACAAGAACAGAGCAGATCTGGAGCTTAAGGCTGCAATTGCAAAA
GAACAGGAGCTTACAGTTCAGCAGGAAATCCGCGAGAAAGCCACGAAGCGTATTGCGATG
ATTGAAAGCTTCATCGACGACTACTGA
>64677fea-30df-436b-bc6e-a5ff37ce0702 (mRNA) 873 residues [BFAB_07:501836-502956 - strand] [cds] name=Bfab07g01350.1
ATGACCAAGAAAATCGGTCTTCAAGCTTTCCTTCGCAGAGAGGTTATGAAAACTAAACTT
CAGGTTCCCACAGAAAATGAATCCCCAAGGTTTACAAAGGAAGCTTCTATGCTATCAGCT
CAGCCGAAAATCTACGAAGAGCCGGAAGGAAATACCTTTCGGAACGTATCTGATGACAAA
AAAGAAGACTACAAAGCCCCACTGGAAAGATTGAGACATTCAAGCACGCCATTTGCAGTT
AGGTATGAGATAAAACCAAAATCCGAACTAAGGATTCGGATCCAGGAACTTAGAAAGCAA
CTTCTCGCTGTCATTGATACTTCCTTCAAGAATTTGCATGAGAGAGCTATCAGTGCTAAA
GAGCGCGATCGTCTGTTACGCTCCATCGAGTGCTTAGAGGCTCAAGAAAAGAGAGAGAAA
GATAATGCACTACGAGCTACTGGAAACCTCCCTGAGCCCATCTCCGAATCTGAGAGAAGA
CAACGGCAAAAGGAATTAGAATTAGTGAAGAATGCCCTAGCGGGAAAAGAAAAAGTCAAA
TCCCCAATCAAACGTCCCTTTCGTCCACTTGACGACGATCCGGATGGCGAAACTCGGAAA
GCGTTAGGACTGCCATTGAGAAGACGCAAGCTCAAGAAAACGGGCAAGTGGGCAAACGAG
CTTTGTTATGCAGTTCCGGAGTTGAGGTATAAGGATTATGGAGTCGAGGTTTTGAAAGAA
ATTTTGATGTGCGGAGCGGATGAGGAGCAAGAGGTGTGGTTGGGAAAGTGGTTTAGTAGA
TTGGATGCAAAGATTACTACAAGTAGTGAAGTGAGAGGATCTGCAAAGGAGAAAAGTACG
CGAAGAAAAGAGAAGGGCCCGGCCCTTTGGTAA
>92944867-b7cd-4571-b030-80f7d36f9a1d (mRNA) 1173 residues [BFAB_07:506301-508021 + strand] [cds] name=Bfab07g01370.1
ATGGCATCACCTGATGAGATTTCTGTCAAGGAAGTACCAGCTCCCACTAAGGATGGAGAG
GTAGAGAAAGCAGGCGAACAGAGACAGGTAGAAGTTGAAAAGCTCTCGACACTTCGATCA
GTAAGTCTCGATGTCGTTGGTGTCGAAAGTGTCAATAAGGAGGCCAAAAAGCGTCGTACA
TACAAAAAATGGTCAGAAAAGGAAGAAGTAATTGTCCAAGGCATCGTTGATAACCATAAA
ACCAATCCCGAGACATCTAACATGGGTCTTGTGGAGTTGGATCGATATTCAGTCACAAAG
CTGGCAGATGCAGGATTCTTCAGAACACAACTGGGAGTTAGTGGTTTCCGTGGAAGAAAA
AGTTCTAAACCCGATTACAACCCGGTCGTCGATCTTGTTGCTAATATGCCTGAATCAATT
CGTTCTATGGAGGCAAATTATAAGCCATTTGCCTCGGTTGCAAGAGAGCCAGTTCGTAGA
CCAAGTACAGTCGTTTCCCAGAGTGCAACTTCATTGCAGGAGTGGAATACTTTGAGTAAA
TTGAAGAACAGTCCATACGCTCTTAATGGCAAGCGAAATTACGGAGATTTCAACGGCGAT
CTGGCAAGAGAGAGAGCCAATGCTGCTACTACTGCTACTTGGAAGCCACAGGCACAGGCA
TCTTCCATGGGAACCAACGGCCAGGGCTTCCTAATGACTCCTGGATCCAAGTCCTGTGAA
GTTTCCAAGTCTCAAATTGAGATGGGTTTAAACATGTTGCCACCATCAAAGCGGATGTGT
GTCACCAATGGTAGTAGAGGAAATCCTATTGAAGCCCGAAACGACCCACTATTAGGTCAA
CCACAGTCAGAGAGTGATCGGATTGAACAAGCCAGAGTCTCAATAGTTAGTCTAGGCAAG
ATATTATTGGGAGCTATGACAATGCAAGCGGCGCATGAGAATATTGCAATGACACACGAG
AATATTGCAATGGCACACGAGGCGCGGCGCAAGGAGGCAGAGAAGCTGGCAGTGGAGTTC
AAAAAGAGAGCTCAGGCGCAAAGAGACGAGATCGTCAGAATCCAGACCTTGAACCCCGAG
TTAAAGAACTATGATGTGTGTTCAAGCCCAGAGATAGAGGAGGATATGCGAATCTTTGAG
CTAGAGTTAAAGAACAATCAGGTATTCCAATGA
>66b5a92e-6ae0-4766-bbd7-613c5d77d825 (mRNA) 3693 residues [BFAB_07:511578-517550 + strand] [cds] name=Bfab07g01380.1
ATGGAGTCGCCAGACAATAGCACATATCTGGAATCCCCTATGGAGGGTGACGATGTGGCA
TATCCGTGTAAAGGATGTGGTGATATCCTCGAGGAGGGAAAAGCCTTCGAACTTGCTGGC
AATCGATGGCATTTAAATTGCTTCCGATGCAATACTTGCGGAACTCTCCTGGATTCCGAT
GCGAATTTGTTACTCCTGGGTGACGGGTCCCTTATCTGCAATAATTGCACTTACAGCTGC
AGTGCTTGCAATAACAAAATTGAAGACCTCGCTATCCTCACCGGTGACCAAGCATTTTGT
GCAACATGCTTTCGATGCAGGAACTGCAAACGCAAGATCGAAAACCTTCGTTATGCTCGC
ACATCACAAGGAATATTTTGTATGAGCTGTCATGAATCACTAATGGCTAGGCGGCGTAAA
AAGTCAAGGGCCGCTGCGAATGCGAAGAAAAAAGACGACCAATCTCCCATGCTTGTCGAC
AAATCACTACCCGCCCTACCACCGAACGCCGTTCCACAAAGCGCCTTCTCCCCTGAACGT
GAGATCCCGGATCCTCACAATGCAGATAACCCTACAGAATTATCACCAAGGCCGCGGCCA
ACATATTCTCGTGCAGATTCCTCATCTAGGAGTAGTTCTCGAAAACCTCGCGATGATACT
TCCTCTCATCGAGCGTCCACCGATACCACAGGCCGGGATGGATTGACGCTTCCAACGACG
ACGTATCGAAATAATAGATATTCAGGGATATCGCAAATGTCCGAGATTGGAAATGGGGAT
GGAGAGAGCTTTTTCATACCTCTGGCTCTGGACCCAAGCCCTGCGCCAACCTTGACACCG
AGATCTACGTCGACATCATGGGACACAAAGAAGACGAAAGAGAATCAAGCACCAGACCGG
GATTATTTTGGCGTGAAAGACAATGTGCGAAGTCAAACCGAACCACAACCACAGAGACGA
TCAAGGGATCTGAGGGATACGAGTTCAACGTCAACACCGCACATCGCATTCCAAGATAAG
AACCAACCATCCGACGAACAGTTGGCACAGATCAAGGAAAGCATACGCAGAGCAGCCAAC
GGCGCAGGCACGCCTGCCAAAGAATCATCTGCATCTACGAGTGATGATACTCTATTACAA
CATGCAACCTCGCCAACCGCTGACGCCCCTGATGGAAAGACACAAGGATCTAGTGAAAAG
TTCAGGTTAGGTGATGTACCCAAGGGAAAGCGGACTGGAACAATGAGAAGCGATTCTCAA
TCGGATTATACTGGCAGCGAGAGCAACTCCTCGAAATCTGCCTTGTCCAACATACCCACC
AGGAAAGACAGCAACATGCCAAAAATGGACTCTCCAAGGACTTTACTGGCAGCAGACCAG
ATTACGTCCAGAGCTTCACTGGAATCACGACCAAAGGACATGGAAAGTTCTACTGTTTCA
AGAGTCAATTCTGGGAGTTCCAAAGTCTCAATACCCCGCAAGGAGATAGCCTCAGGACCC
GTGAAAAGCCACGTTAGTACAATGAGCTTATCCTCCGGAACAGAAACCTCTCCATCCACG
GAATCCTCTTCCGAAGGAACAGCCCATACCCCGACAGTGAATGGCAAATCAATCTCTGGC
CCCTTGTTACAATCGCCTATAGATGATATGGTACCGCCAAATCGCTCGTCAATTCGTCCT
TTACCAAAACAACAACTCAGTGATACATACATGACTCCAAGAGCACCCCCAGCGCCGCCA
TCGGCAGGCTCGAATGGTACCGCTTCATCGCCTAATCTACCGAGGTGGAGTGCTGGCGGT
GACCTTACCATGGATGAAGATATGGCTAGAATATTTGGCAACGATGAAGGCTCACAATCT
ATAATTCGCAGAGTTTCCAATGCTGTACGCCACGTTCGAAATACAAGCAGTGAAGCAAGC
ACTTCTGCCCGTGGCCATGGTCGTAGCGTCAGCGAAACAACCGCACGTACTCCTAACTCA
CCACGATGGCCAAAAACACCAATTGTAGAAGACACTAGCGGACCTAGAGATATTAGTAGC
CCGATTTCTATGAGCTCGCCCAATCCTGGGGATGATCCAGCTTTGCTCAGAAGGCAACTT
CGCAACTCCGAACAAAGAGTTGCAGAACTTGAGAGGCAATTTGTAAACGAGAAAGATTTA
AAAACACTAAACAAAAAACTCATTGAAAAACGAAAAACTGTCTCGGTTCTAGATTCTCAA
ACGGAACTTATGATCCGCCAATTAGAGGTTCTAGCTGGCTATGTGGAACGTGCCAAAGGT
TCGAAACAGCCACTTGACATTGCTGAGCTGGAAGATTCTGCCATCAAAGAATTTGTTCAA
AAGCTTGATCGCCTTAAGCAGTCGATGTCTAGCGCAATTGAACAACTCTTTGAGGAGCGA
GATGAATTACTAGAAGAAAAGAACCAAGCTATTGCCGATCGTGATAGAGCTTTAGTTGAG
TTTGAGCAATTATCATCTAAGAATGCACAACTTGCAGACATGAATAATGATCTTACCCAC
CAAATCCAGGAACGCTTTAAATCGGCCAATACCAATATGGAAAGCCCAAGGCCACTAACA
AACGGTCTGGGAATCTACACTCACCATAATAAGGATAAATCTAACGTTTCCGTTCACCTA
GATAATGCAAGCCTCCGCCCATCGGAAAGCAGTAGTGCTACTTACAATAACTCGATCAAT
AGCTATCCACACCCAATGGAACAGGACCCCAGCATGGAGCCAGCGACGTTATTATCAGCT
CCCCATGTCGTCAATATCCGCAAGGGACAAGCAAAGAAGTTTAACTGGAAGAAGGGTGGT
CAAACTGTTGCTAAGGGAGTTACTAAAGGTTTCAAGGGTGCTTTCTCCAGCGGACAAGAG
CGGCCATTAAACCAGTGGCCAGGTCAGACTGGTGATAATATTGGCATGCCTTACAACATG
ACTATGGAGCACGTGCAATCTCCGGCACCAAATGCCTCTGGGACAAGTTTACCCAGGTCT
ACATCAAACGACCCCTCTCGTCAAGGGTTTGGATTATTCAAGAAATCACAAACTATGCAA
AAGTCGATGTCCAGTGGTAATATTCTCGCTGCTGAGAGCCCGTCAATTCTGTTCGGTTCT
GATCTTGTTGAAAGAGCTGATTATGAGCGTCGGCAAATTCCAAGTGTCGTCACTCGTTGC
ATTGAAGAAGTTGAATTGCGTGGAATGGACATTGAGGGTATCTATCGGAAGACTGGAGGT
ACTGGGCAAGTCAACATTATCAAAGAAGGATTTGATAAGAGTGAAGACTATGACATTTCA
GATCCTGACCTCGATATCACCGCGGTTACAAGTGTTCTAAAACAATATTTCCGAAAGCTT
CCTGTACCACTTCTGACCTTCGACGTTTATGATCGAGTATTAGAATCAATCTCCATCGAA
GACAACGCAGAACGCTGCACACATCTACGGAACACAGTCAACATGCTACCTCCCAAGCAT
CGTGATTGCCTTGAGTTTTTGATTTTCCATCTTGTGCGTGTAGCAAAACGAGAAAGCGAG
AACTTGATGACACCTAAGAATCTGGCAGTGGTTTTTGCACCGACCATCATGCGTGATCAC
AGCATAGACCGTGAGATGACGGATATGCATGCTAAGAACCAAGCTGTTCAGTTTGTCATT
GAGAACAGTTACGACATATTTGCCGGCGCTTAA
>8cb105c5-e219-4016-acab-1bc45e0fff81 (mRNA) 3270 residues [BFAB_07:518297-522192 - strand] [cds] name=Bfab07g01390.1
ATGGGTGAAAAGATCACCGAAGATCAAGTAGCAAACTTGCTGGCAATACTTCGAACAGAT
GCTTTGATAGACTCCAAGGTCAATCAGATCAACAACATCAAATCCAGTATCAAACAACAC
AACGTTCCAGAACCATGCATACTTTCACTATTCGAGGCCTTGCGCCTAGCAATGTCGTCG
CAGCACGCCGCACTGGTCAACGCCGGATTCTCTACCCTCAATCATCTCCTCACCAGACTG
TCACGCCAGGAACCAAAATACATTGTCAAGGAAGCTGCCCGGACTCTGCCAATGATAAAT
GATAAGATGGGCGACCAGAGGGAGAAATATAGACAACTTGCTGCGCTATGTCTTACAACG
TTCTGGAAAAATGCGCCGATGGATGTAGAAAGAATCGTGAAGAACGCAGGACTGGTAGGA
AAGAACTCGAGGATGAAAGAAAATTCAATGAATTGGATTGTACAGATGCACCAAGAGCAT
GGAATGCCATTCAAAAGCTTTGTAACTACACTAATGGAGCTACTCGAAGATGCCGATGGC
ATGGTAAGAGATACCGCGAGAAATACTGTCATCACCTTATTCCAAAATGCCCCCAATGGA
GCCAAGTCCGATCTCAAGAAGCAATTGAAGAATTTCAATGTTCGACCAGCGATCGTATCA
GCTATCACGAGTCAACTTATATCAGGAGGAGCCCCAGTGGTTGTGGAACCGGAAAGAACT
GAAGCCCCTATGCGCAATCCTTTAGCTAGTAGTGCATCTGCGATGAACGTCTCAAGACCA
GCAACACCAGAAGTCAAAATTGAGCAAGTAGACCCTGCATATGTGAACACACAAAGAGAG
TTGGAGGAAACTTTTCAAGAAATGCATCAATGGTTTCAAGACAAGGAGTCTGAAGCAAAT
TGGTTTAAGAGAGAACAAAGCTGTACAAAGTTACGGAGATTGAACGCTGGAAACGCCCCA
AGCGACTACCATGATGCTTTTCTGGCTGGTATCAAAAGCCTTCTGGATGGTATCTTGAAA
GCTGTTAATTCATTGAGAACTAGTCTTTCAAAGGAAGGGTGTAGTGTCGTTCAAGAAATT
GCTCGAACTGCTGGGCCTGGACTGGATCCTATGGTCGAAATTCTTCTGCAAAACCTTATC
AAACTCTGTGGTGGCACCAAAAAAATCAGTTCGCAGAACGGAAATTTGACAGTTGATATT
ATTATCAGCGGCGTTACTTATAATCATCGGATCATGCAGCATATCTGGCTCGCATGCCAA
GACAAGAATGTTCAGCCTAGAACTTATGCCACAGGCTGGCTCAAAACATTGCTTAAGAAG
GAGGCGCAACACAAGAGTCACGTTGAACATAGTGGAGGCTTAGAACTGATTGAAAAGTGT
ATAAAAAAAGGTCTAGCCGATGCCAATCCTGGTGTTCGCGAGAACATGAGATCAACCTAT
TGGACTTTTGCTCAGATATGGCCAGCAAGGGCTGAGTTAATAATCGAGGATCTAGAACCG
ACTCAGAGAAGACTACTAGAGAATTCTCCAGACAATCCCAATGCGCCAAAGAAGGCAGCG
GCAGTCAGTTCGACAAGGCCTGGCCTTGGTTTCTCCAAGAGCACTACTGGACCTCCTAGA
CCCTCCTTGAGGGAGACTATGTTAGCACAGAAGAAGGCACAAATGGCCACCAAAACTATT
CCTACTCGTCCTGGTTCTGCTATGTCAACATTTTCTCCAACAAGGACCGTGCCAACCAAA
CACTCGTCTTCAGAAGTAGCTCCCACAAGACCTCATTTAGATGCTACTGGATCTCGTGGC
GGTCTTTCTGTTGCACCCATGCGACCAAGTAAATCTAAGAGACCAGAACTTGCTGCTAGA
CCTGCAACAGCCGGACCATATTCTGTAAGAAGAACTAATCAAGCCTCCAGCGAAGCAAAT
GCCAGCCCTTCATCCTCCACATCCGCAAGACCACCAAGATCCAAAACTCCTGTTGCTACC
AGCTCTCCCCAAGCTAAAAGAGCTCCAATTCCGAGACCCAACACAAGCCATTCTAGCCAT
CCCACGCAATCTCATCATCCAACCCAATCCACTTACACAAGTCCTGCAGCAAAAAGTGCA
TCTGGACGAGTTACGACTGCTTCTCCTAGACTTGCTGCTTCCCCTCACATTAGTAGTCCT
GTTAGGACAAGAACTAAGTCGGTACCTGGATTGCCTGGACCTGGATCTAGTCCTTCAAGA
GCAGATGAAGATTTTACGATGGTCGTTCCCACGATTACTGGGTTGGAACGGATACAATCT
GATAAACTCCCTCAGGTCTTTGAACCATCTGAGGTGAGAGATATCAAAGCTCCTGTCAAT
CAGCCAATGAAGGTTTATGAAGATCCATTCTCAAGCACAGATGATACTACTACTCCAGGA
CCTGCAGTTCCTCAGTCCGTTTTAGAAGAAGTGCCTGTGAACGAAGATGCTATAAACCTG
TCAAGAAATAGCATCAGCGAATTTGATGGCGAAGGAGCTATGAATCCGCCAATGTCACCG
GACAAACTCAAACATAGCACAAAATTACTCGATAGCGGTATCTCCAAAATCAGAGCTAAA
TCTCTAGACGTCCACGGTTTCCGAAAACTTCAAGCCATGATCAGAGATAACAAAGCTGTT
TGGGGAGATGGCAGGTTCCCCGCCCTCTTGTTAGGACTTTTTGAATATCTTGAAGAACCA
TTAACAAATCTCTCGCCCGCAAAAGTTCAGGATGTCAAAGCACAAATACTAGCTACAGTC
AAACTCATGTACAAAAATTACCGAGAGTATTTCAGACCACATATCGCAAAAGGCTTTCAT
TCTATTCTTGTAACTAGATCCTGCTATGATGCACGCGCCCATATTGTTAGTGGCCTCGAA
CTTCTTGCCGATGAGCTTGTTACACTTGCCAATCCCAAAGAGACCATCATTACCATTCTC
AACTCCCTCTCCAACGAAGAAATGACATTGGAGGGATGCCGAAAATTTAGTATGGGATTA
CATATACTTAAGCAGACGTTAGATATCAAGTCCGATGTTGAGTTGGAAGATGCGGAAATT
GATAGCATCTTGGAATTGGCAGCAAAGTGTCTTGAGAGCAAGGAGAGCGGAGTGAGACTG
GATGCTGTGGTACTCTGTGTGAGTACGCATGCAAGAATTGGAGAGGCAAGATTCTGGAGT
GGAATTGGTGGAAGAGTGAGTGGCGATCCAAAGAGCTTGATCACGTACTACATTGTCAAG
AGGCAGAGGGAGCTGGAGGTAGAAAATTGA
>b3a56976-855f-48f8-889e-e73cb7649aeb (mRNA) 969 residues [BFAB_07:522390-525032 + strand] [cds] name=Bfab07g01400.1
ATGCCCACTTCCCCCGCAACCAGCCCGGTTCCTCCACCTGTGTTCATGCCTCAATTCTCC
AGCACCTCGCCGGCTCCAACTCCTGTACCGATGCCTCCTGCGAAAGAAAAGTCGGCTTCA
AAGCCTAGTAAAGATGATGGTTCCATTCCGGCGATCAAATTCCCTCTACCCAAGTTACGC
CTCGAGTTACGGGATCTCAATCATGCAGGATCGCATACTTTCTTGACCGCCGTTATAGCG
GACGACGCTCTACAGACGGCAGTTCAAAGCGTTCTTACGCTACTATATGAGTCCCCCACT
TGTCCTACCACAACTCCGACTCCAACTCGATCGGTGACCCTCATCCTCCGTTCCATGGAA
GGTGTGGCATATACAACGGGTAGCGACCTTGACAATGACCATAAGGAGATACATTTATCC
CTAGATTACATACAGCACGAATCAATTAAGCCGGACCGAAAGAAGCATGAGATCATGGGT
GTGTTGACTCATGAAATGGTACATTGCTGCCAGTACAATGGATTCAATACTTGCCCTGGT
GGCTTGGTTGAAGGAATTGCAGACTGGGTTCGATTGAACGCCAATTTGAGTCCACCTCAT
TGGAAAAGAGAGGCCAGTGGGAAATGGGATGCAGGTTACCAACACACCGGCTACTTTCTT
GAATATCTGGAACAGAGATTCGGCAAAGGCACTGTAAGGAGGGTGAACGAAAAATTGAGA
GTTGAGCGATACGAAGAGAAACGATTTTGGACAGAGCTTTGTGGAAGGCCGGTAGAACAA
CTCTGGAAAGATTATTCAAAGTATCTGCAGGAAGAGGAGAGGAAAGCAGAAGAAGAAGAG
TGTGTGGTTGTGGAAAAGGAAGATGCTATAACACCCAAACAGCCCAAGTGTGAAGGAGGT
AAAGTGACGCTTGCCACAACAACAGAGGAAACGAAAGATAACCCCACAAACACTGAGAAG
CTTGAGTGA
>85f18bb9-f526-4512-bec2-622cfad1ac4a (mRNA) 1200 residues [BFAB_07:526084-528048 + strand] [cds] name=Bfab07g01410.1
ATGCCTAATCATCCCGTTTTGGTTTCAGGTGCGGTAATCATAGCTGCTGTGGCTGTAGGC
GCGGCGATAGCAGTATATGAATCACCGCAAGCCCGTCAACTTGCTGAAGATGTTCGTCGT
AGAATTGCAGTCGCATTACATTCCCTCGGCGATGGAATTAATCCGAACAGTCGACAGCCT
CGATTCAACCGACCTGAGGATGCAGAGGGTTTTATGCAGAGTGCTTCGGAAGTAGGTGTC
GATGCCGATGAGGATAGCAGGAGAAAACAGAGAGAAGAATTGATGTATTGGAATGCAGTG
CGCATGGAAAGAATGGAAAAGGAGCAGAAAATGGATGAGAAGAGACCCGCGGGAAACCCA
ACTCGAAAGCCGAGTTTTGAGGATTTCTTACAAGAGGATCCCAGCGCTGAGAAAGGCACT
TTTGTTTACAACACTGGCACGGATTTGAATGGTCAAGCTGAAGAGGGTCTTACCCATCGA
CGAGGTGTCCGAGGTTTAAATCGATCGACAATCTACGCAAACCCATTTGCAGATGAGCAT
GGTATTGACAGCGAGGAACAACAAGCTATGGATAGAAGTTTAATGTCTCCTGAAGACGGC
GAACAATACGAATCTGACTCTGAAGGATTATACAGTTGCCACGAAGGCCGAACTCGACCC
CGCTCTCGACAAAGTACTTCCACTCTTTCACCAGCAGAACCTATAGCCCACGAAGACGCC
GAAACCCTTGTTGATCTTTCTGAACCATTCAACCCAGATCCACCAGTCTCTGTACCTACC
CTTGAGAATTTGCAAACTGAGCCAACTTACACAGCAAGAGCACAAGACAATGAAAATCCA
TTTGCATCCATCCACGCCTGGGCCGATCATACTGATAATGCAACCGGATTTTATTCCCCT
CTCCCTGTTACGCCTCACGAACGTCCTTCAACCCCAACTGCTACCCAGAGCGCTCAAGTT
ACTCCCCCTTCACCCACCATCTCCGATCCCGATTACTCTTCTCTTGAATCCCTCGATGGA
GATGGAATGATCACTCCTACGGATTCTGCATCATTAGCTGGTTCGGGTGAAGAAGTATGG
CACCCAAGAAGCGGCGCTACCAGTGACGCCGACGTCATGAGTGTGGATGATGGTATCGTC
ACACCTGATAGCTGGTCGGAAATTGGAAGCTTAGCAAGCGAAGATGAAGTACACCATTAA
>a3fe132a-8a87-47d1-8867-f08327840081 (mRNA) 1959 residues [BFAB_07:528363-530946 - strand] [cds] name=Bfab07g01420.1
ATGAGTGAAAGTTATAGACCAGACAATGACGCTTTTCCGGAGTCACCTTATGATATAGCA
TTTCTGTCACAAAGAGATCTGGGCTTAAACATACCAATCAATTATGCTACGGCTCCTGGT
GTTTCTTTGACGGCCGCATGTTTCTCATCTCTCAAGTATGAGGATGATGATGCGACTACT
TGCATTTCCAATTTATTGGCCAATGGATTCCGGAGACTGGAAGTAGATTTATATTGGGAT
GAAGCAAGGCAATTATGGAGTTTTTGCCCTGCTGCTGTGCCAATTTCGAGTTCGGATGTT
GCCTCTACACCAACTCCAACATCGACGCTTTCATCCACCACAGCCAGTTTAACTTTAGCC
CAGCAAACTTCGGATTTGATTCCTAGGCAAAATGCAGCCACGAGCCCTATCATTCCTTCA
CCAAGTACATTAGATGTTACATTTAATTCAAGACCTACTTCCCATAGTTCGTCTACAGTG
AACGTAATAGCAAGCTCTCTCGAATCAACCCTTCCTGTAGCCTCTGCAATCCCAAAGCTT
TCGAACAAATCGCTGTATGATATTGGAAGCTACACTTGTACTAACACTATCAACCTTGAT
ATGCTAACAAGCCTTCTTTTGGATTGCATACAAGAAACACAAAATAACATTGATGCATAT
ATGTTGATATTGACTCTCAATATCCACGAAGCAAAATCTGGTTTCGGCATTGATGACCCT
GCTCCTCAGCCAACCGACCTTCCAGATCCTTCAGAATCTCTAAAATTCCTTTTTGCGTCA
AATTTTTCAGCATACATATATACACCAAATGATTTAAGGATTGATCGAGCAAATTTAAAC
ACATCTTGGTATCAAGTTGCAGCAAGATATCGACCTGATTTAGATTATTATACTACCGCC
ACGGAAGAATTTGGTATTATATCCACTAAAGATGGTTGGCCATCAGAATCTTACATTGAG
TTCTCTCAAGGCAAACGAATGCTTTTACAGTTTGGCTCTGTGGACCCTCAAATGGAGAAT
TACAATTTCAGTGGAGACGCAGGGACTATCTTTCCTCCAGGCTATCTTAGCAACCGCCGC
GACGACGACACATTAGCCAGTGCTGATGGAGTAATAGAAAGCGGTTGCTTCCTTGTTAAT
GCCACCGAAGACGTTTCTCAAGTAAACTCATCCTGGGCAACAGCAGTAAACATAGCCGGA
TTCGATTATCCCACCGACTCGAATTCTAGCCTCACTTCCCTCCTCAACCTAACATCCTCT
CTCACAAACTGTGGTATATCCCCAAACCTCAACACAACCCTCCTCAATACCAGCGCCAAT
ACCAACAACTTCCCCTACCAACACTACACCTACTCCACCATCTGGTCCTGGGCTCCCCAC
GAACCCCGCTCCTCCAACAGCAGCAACGACAACGACGACTCCCTCTTCCGCTGCGCCACT
CTCCACCCCGCCACCACCCACTGGCACGTCACCGACTGCTCCACCAAACTCTACGCCGCC
TGTCGCGCCCCTTCGCAACCCTACAACTGGACCCTCACCACCTACCCCATCTCCTACTCC
TACGCCTCACAAGCCTGTCCCACCCCCTACATATTCTCCGCGCCACGCACCGCCCTCGAA
AACGCCTACCTCTCCCAAACCGCCACAAACCTCTCTTCCGCCCGCGACTTCGACTCCGAC
GATCCGAAAATCTGGCTCGATTTCAACTCGCTCGATACCAAAAATTGCTGGACCACCGGC
GGTCCCAATATCACGTGTCCGTATAGCAATGAAGATAGCGACGATTATGCGAGAGAGAAA
GTCGTGGTTGTGCCGTTGGTAGCCACGACTATTGTTTTGATCATTTTTTTCCTCGTGCTC
TGCGTGAATTGCGGAAAGGGGTTTTTGGGGAGGAAGGGCGAGGGGAAGAGGAGAAGGAGG
GTTAGAGAGGGCGCGGTGTATGAGGGAGTGCCGGCTTGA
>7f0fadbe-c7ff-443b-bb8f-a8b8ccbc2b66 (mRNA) 1536 residues [BFAB_07:531237-533311 + strand] [cds] name=Bfab07g01430.1
ATGGATTCTCCAGACGCAGATCCCCAACAAGGGCCACCACCAGGACTAGGTCAAATTCAA
TTCAGATTACCAGACGGTTCGCAACCAAGTCCCGAACAAATACAGATAATGCAGCAGCAA
ATCGCTCAGCAGGCAAAACAACAAGGATTATCGATACCTGATTTCATAGCAAAGATGAAT
GCGCAAAATCAAGCCCGATTACAAGCCCAAGGCCAGCAGCCATCTCCAGAACAAATCCAA
GCCATGCAGAAGCAGCTAGCTCAAGACGCCGAAAAGGCAGGAATGCCTGTAGCTGAGTTT
GTAGCAAAGATTAGGGCGCAACAAGCTCAACAACAAGCTCTACAACAAGGCCAACAGCCA
TCTCCAGAGCAAATTCAGGCCATGCAGAAGCAGCTAGCTCAAGATGCTGAAAAGGCGGGA
ATGCCTGTAGCTGAGTTTGTAGCAAAAATTAAGGCTCAACAAGCTCAACAACAAGCTCTA
CAACAAGGCCAACAGCCATCTCCAGAACAAATTCAGGCGATGAAAGAGAAATTGGCTCAG
GATGCAGCAAAAGCTGGTATGTCTGTACCCGACTTTGTGGAAAAGATAAAGGCGGATGCG
ATGGCCCAACAGCAGCAACAAAGAGAAGCTGCAATGCAACAGCAGCAGCAGCAACAAACT
CAGCCAATTAACCCCGGCCCTCCGAATCCAGCTGCTGTTGCTCTCGCAAACTTCTTGATG
GGTCAGGACTTGAAAGCAAGAACATGTATCTTGAATGGTCAAAGAAAGGACATGTTTAAA
GTGAAACGTGCTCTACGAGCCATTCAATCACCAGCTTATGAAAAAGCTCGCAAGAAGAAC
CCACTTCTCCCCGAAATTACTGATCGCGCTTCACTCGAAAATTGCTTCAAACTTCTCCCA
CTTTCTCTCCTTGCACTCCGTGTTTCTAAAGTCGACCCTCATGAAGGTCATGATCATGCC
CCTGGTGCTCACAATACAAAGCGGGTGAAAGGACTTTGGACTGTCAAAATTGAACCGCAG
CAAGAATGCAAGGAAGAGCTCCATTTCGTATGGCTTTATGAAGGTACACAAATCAAACAG
AAATTGTACGCTGCTGGAGCATTAGCGATTGTATTTGCAATTGTCATGTTCCCACTTTGG
CCAATGAAGATGAGATTGGGCGTATGGTATCTAAGTATGGGTATGCTTGGATTGTTAGGA
TTATTCTTTGCGATGGCAATTTTCAGATTAATTCTGTTTGGTATTACAATGTTTGCAGTA
CCTCCTGGATTATGGTTATACCCAAATCTGTTTGAGGACGTTGGATTCTTCGATAGTTTT
AGACCAGTCTGGGGATGGCAAGAGGAGAAAAAGAAAAGCAAGAAAAAGTCAAAGTCGAAT
GCCTCTGCCAGCGCAAGCGCTATTGGAGCAGCAATGACAGGTCAACCAGCTCCAGCATCG
GCAACCACGACAGGATCAACAGCACAAATTTCTACCGGAGAAACCACACAGCGAAACCTA
GCACCAAGAGTCGAAGAGGTGTTTGATGAAGAGTAA
>3e9044ce-8f1b-478d-9dda-c00c4df3921f (mRNA) 1113 residues [BFAB_07:533399-534837 - strand] [cds] name=Bfab07g01440.1
ATGAAACGAACAACCCGCAAAGCCCTCGTGCATCTCACGCTTTTCTGCAGCGCCCTCTTC
CTCATCATCTTCCTCAACCGCTCTTCCAGCAATACCTCTTTCCCCTGGACCCGCATCCGC
TACACCCATGATGCACAATCCCGGATCCCCGTCCCCCCTGCACACGGCATCTGTCCCGGG
CTCTCCACCACCACCAAACCGGTTCTCGTCGTCTCCCGCGTCGAAGCCGACGGCGATTCC
AGCTGGCTGGATTCGCTCAGCCACAAATACCACATCTGCCTCTACAATATCGATTCCTCT
GCTCTCCTGAAATCCTCTCAGAAAGTGCTCCAAGTGCCCGCTAACAGAGCGCATGAAGCC
ATGCCCTATCTCACATTCCTCATCGATAACTATGCAAATATCCCCGCGACTGGCGCGGTA
TTCGTCCATGGAAATCGCTATCAGTGGCATAATGATCATCCGCAATACGACAATCTTGAT
CTGTTATCTCGGCTTGATCTCGAGAGTGCGTTAGCGGAAGACGGATACCATAATCTCAAA
TGTGATTGGAGTCTCAGCACGTGTAGCGATAAAGCAGTCGCCCAGGGAAGTCTCGAGACG
AGTATGCAAGCATCCCTGCAACCGTGGGACAAAAGAGCAGTTTCTGATGCGGCGATGCCG
AAGGCGTTAAGGGTGTTATTCGGAGAGGGCAAACAATTGAGCAGAACGGATGTTGTGAAA
AGTCAATGTTGTGCACAATTTGTCGTTTCGAGGAAAAGTATTTGGAAACATGATAGAGAG
GAATATGTGGCGCTCAGACAGTGGCTGTTGAACCCTGATGGCGCACCTAAGGATGATAAG
GTAGCGGGCAGAATATTGAGTTATTTGTGGCACGTTTTGTTTTTGGAACAAGACGGTGGC
GAGGTTGAGGGAATGGTAGATTTGGATAGACTTAATAGACAGGCTTGTCCGAGTGCACAA
AAGTGCTATTGCCGACTCTACGGGAAGTGCGATCTAGATTGTAGGACAACGGGGACTTGT
CGAGGACAGTATGTATTGCCGAAAAATCTCAGGCTTCCGGAGGACTATGGAAGACAGTTT
GAGCATTTGGATGATCACTCGGATAGTCTTTGA
>9d06e8a6-ae77-4828-81c9-1333756c6eb4 (mRNA) 2307 residues [BFAB_07:535932-538935 - strand] [cds] name=Bfab07g01450.1
ATGTTGTTTCCAGAAGAAGATGCAGGAGAATTGAAGAAATGGATTATAAAGAGACTGGAA
AATACATCAGATGCAGATGCTGATGTTCTTGCCGATTATGTTCTTGCTTTATTGCGACAT
GATGGAGACATCAATACAGTTCGACAACTTTGCATGGCTGAAATTCCCGATTTCTTGAAA
GAGGATACATCAATTTTCGTCCGAGATGTCTTCGATGCCCTCCAATATAAGACATATTTG
AGTGGTGGACCTCCTCGTCGCAATTCGCAACAATTCGCGCCACCTACCGGTCCATCAGCT
CCAGCCTTCAATAACCCAAATATGGGACCTTCGATGGGCCATCAAAACGGTTCCCGAAAG
CGCGCATTTGACGGACGAGGTGATGGAGACTCTCAAATGTATATGGGGGGCGGAGACCAG
AATTCGCGCGCATTTAAACAACCTCGAAGAGGTGGCGCGGCAGGACGTGGAGCTTTCGAC
AATTTCAATAATGGCAGAGGAGGATTTCAAGGTCGTCCACAACATATGCAAATGCCGAAC
GCGCAATTCATGTCTAACATGCCTAATATGCCAGGTTCTCCAACGGGCTTACCTCTCGAT
CCAAACAATCCAATGGCAGCTATTCTTGCTATGCAGCAGGCTATGGGTGCGATGGGTATG
CCTCTTCCACAAGGTATGCCAGGATTTCCTCCTAACGGAGCCAATCAAAATAGAGGACAC
CCAGGTCCAACGGGCCAGAGGAAACAAAGATGTCGGGATTACGACCAAAAGGGATTTTGC
GCGAGAGGAAATACTTGTATGTTCGAGCATGGTCAAGATTCGATATATGTTCCTGGAGGC
GCTGGCAAACCTACAGACGAGTACGATCCAAGCAATGCGTCGCTTATGACCGGAAGTCAG
AACCAGAATGATAACAACCAAAGACCGCCACCATATAACGGCTTTGAAAACAACCGTGGT
GGTATGGGACGTGGCAGAGGGCAGTCTATGGGCAGAGGTGGATCGCAAATGCATTCTAAC
AGAGGTGCGAGACGATCGGAGTTCTCATCAGATCGAGCAAACTTCAATAAGAACAACACT
ACAATCGTAGTAGAACAAATTCCAGAAGACAAGTTCTCAGAGGAAACCGTTCGAGAATTT
TTCTCTCAATTCGGTACCATCAAGGAGGTAGAAATGAAACCATACAAACGACTGGCATTG
ATCACATTTGATGACTGGAATGGGGCGAATTCAGCATACAGCTCACCTAAGGTCATTTTT
GACAATAGATTTGTAAAGGTCTATTGGTTCACAAATAATGAAGCGCTTCCAAAACCTCCT
GCTAATGGACTATTCAATGGCGCAAATAACAACGGTGCATCTGGCCCAGTCCCTGCAAGA
GAGACGGATGAACCTCAAATTGATATCGAGGAATTCGCGAAAAAGCAGCAAGAAGTACAG
AAAGCCCACGAGGAAAAAATGAAGAAAAAACAGGAAATGGAAGCCACTCGTAAGGAGCTG
GAGAGACGCCAAGAAGAGCTTCTGAAAAATCAAGCTGAGGAAAAGAGAAAGTTGATGGAA
AGACTTGCAGCCAAGTCTGGTAAATCTGTATCCCCAGGTCTTAATACAGAGGGTGGTTCT
CCCGCACCTGCACCTTCATCTCAAACAGAAGCCTTGAAGAAACAACTTGCTGCTTTAGAG
GCGGAAGCTCAATCTTTAGGGTTACCAAGTCTGGATAGCCCTCTTTCTGATGATACATGG
GGTGGACGAGGTCGTGGACGTGGTGGCTATAGAGGAAGAGGTACTTTTGCTCCACGTGGA
TTTCGAGGTGGCTTTAGAGGACGTGGCGGTGCTGCTTTTGGTGGTGGTGCTCCGGCCCGC
TATAATCTTGACAATCGAACGAAGAAAATTGCCGTTAGTGGTGCCGACTTTACAAATCCT
CAGATAGATGAGAGTTTGAGAGAGCATCTTTTGGGTATTGGTGAATATACTGAACTCACA
AATACGCCAAGCGGTTGTCAAATCACTTTCAAAGATCGTCACATAGCTGAAAAATTCATG
TATGGGCTTCAGAACGGCGAAATTCCATCAGTAGGGAAGGTTGAACTATCATGGATTCAA
ACGCCCCTACCACCAGTTACATTGCCAAACACTCAGAGCTCAACCGGAGGTGGTAACACA
GAATCAGATTCCAAGATGGAAGGTGCAATGGAAGGTGATGCCATGGCACAAGATTCTAAT
GCAATGGGTATGAGTGGACATGGTGGTGAGAGAGAGATGCAAGAAAACATCGATTATGAT
GTTGCGGGTGATGACGATTGGCAGTAG
>f923ad31-218f-45d7-8772-94dff23c1e84 (mRNA) 2748 residues [BFAB_07:539239-542833 - strand] [cds] name=Bfab07g01460.1
ATGTATCTTTACACTGCCCTGTTTGGGCTCATGACGGGAGTGGTAGCTCAATCTACCGTA
GATTATTCACAATATGTTCTCACATCAAATGGCGAGGCCAGTGGAGGTAATACTTTCCCT
GGAGTTTCTTTACCTTTTGGGATGGTCAAGCTTGGGCCTGACATGTTCACGGGAAGTGAT
AGCTATTCTGGAGCTGCATTACGTGGCAACTTTACCGGATTTTCCATGATGCACGAGAGC
GGAACTGGAGGATCACCGAAATATGGTGTTGTCTCACAGATGCCGATACTTGGGAATATA
ACTAACCCGCTGGTTAACCTGAATGATACTCGAGCCTCTGCCGATATCACATCGGTAGGA
TACTACAAAGCCTCGCTAGGAAGTAACATCACTGTCGAATTGGGAGCAACAAGTCGTGCG
GGCTTTTATCAGTACACATTCCCAGAGGGAAGAGGTACCCCAAAAGTAGTTGTTGATGTG
TCTCATGTATTACCATCCTACCGAAAACAAGGCCTTTCTCAAAATTACCTTGGCGGAAAT
ATTACCGTACTAGAGGATGGACATTATGAAGGATCTGGTGATTATAACAATGGATGGAAT
ATGGCACCTGACTGGAGAATATACTTTTGTGGCTACTTCGAAAGTCCCGCAACGACAAAG
ACATTTACCGGAACGAGCCTCAATGGAAGCGTAGTTGCAAGTTATGGTACGGAGAGATCG
GCTTCTTCCAAAACTCGACTGGGAGCCATATTCAGCTTCAATACTACAACGGTAATCTCC
AGAGTAGGAATATCTTTTATATCATCAGCCCAGGCCTGTGAAAACGTCAATTCACAAATA
CCTTCTGGTACAACGCTCTCCGCCTTGACCAATGATGCGAAAAATGTCTGGAATACCGAG
GTTTTATCCAAAGTCACGACTACCGAGACCAACAAAACCAATTTGCAGTTGTTATATAGT
TCCCTATATTTCATGCACCTACTACCATCCAATCGGACTGGGGAAAACCCACTCTGGATT
TCATCAGAGCCGTACTATGATGATACCTTTACGACTTGGGATCTATTTCGGTGTACTTTT
TCGTTACTTCATATACTTCAACCGGTAGCATATGAGGAGTATATCCGGTCATTGATTGAT
ATATTTCGATTTGAGGGTTATATGCCAGATGCCAGGTCCTCAAATTTTAATGGCGCAATA
CAAGGGGGGACTAACTCTGATAATGTGCTAGCTGATGCCTATGTAAAGGGAGTAAGAGGG
GCAGTGAATTGGACCACCGGTTATCAAGCTATGGTCAAAGATGCTGAAGTTACCCCAGCT
AATAATAACGATCCTCGAGACAATTCATCTTCGACAAAAGAAGGTCGTGGAGCACTTCCC
GATTGGTTACAGCATGGGTATATTACACCAAAATATGGCCGATCTGTGTCTCGAGCTGTC
GAGTATTCTTTTAACGACTTTTCCCTTTATCAAGTAGCGACTGGGTTAGGAATAAAAGAC
GACGCAATGAAGTATTTGAAGAGGTCCCGTTATTGGGTAAACCACTGGAACCCAAATGCT
ACTTCTCTAGGGTTTAATGGATTTCTTGTTCCTAGAAGTGCTTTAGGATTTATCAAGCAG
GACCCACTCTCATGTGGTGGATGTTATTGGGGAGATGCTTACTATGAAGCACTGCCTTGG
GAATATTCCTTCAACATGCATCATGACATGAACACACTGATCGCATTATCAGGTGGACCA
TCAACATTCGTCAATCGTCTTGGCACCATGTTTAAACCTGGAATCAACACCTCTGGGCGC
TCCTCAGCATTCAACAACACGATTTTCAACCCAGGCAACGAGCCATCATTCACCACACCT
TACTTGTATAATTACGTGGGAAGACAGGATTTGAGTGTGATGCAATCTCGATACATTGCA
AAGTCATATTATTCACCTACACCTGGTGGGTTACCGGGGAATAGCGATGCTGGCGCAATG
GAATCATGGTTAATTTGGAATATGCTTGGTTTATACCCTATGGTAGGGCAAACCACCTTC
TTAATTGGCAGCCCATGGTTTGCCAACACAACTATTCAACTTGGTGGCGGAAAAACACTT
GCTATGACCACTGTTAACGGATCCGAGTCTTCCTTCTATGTCCAATCTCTCAAAGTTAAT
GGGAAACCATGGAATCAATCATGGTTTACCTGGAACGATGTCTTTGCGAATGGTGGAACA
ATGGATTTTGTTCTTGGATCTCAACCCTCCAATTGGACAACGGGGCCAGCACCACCAAGT
CCAGCGAGCATGGTCAGCGATACTGCCGATCCCAACAGTATTCTGACGCCGGTGCCCACA
GCTCCCGATCCTAAGTCCCATAATGGCTTTGAGAGAGAGAGGAAAAAAGCAATGATGAGA
ATGATTGCTTTTGTGATTTTAGCTGTAACTGTAGTAACAATTTCTTGCGCAGGAATTTGG
CATTGGCGAAAAAGAAATGCTACAGCGAAAGTTGATATTGTTGATCAAGAAAAAGGGCCT
AAACAGGCAGATGTGTCTGCACGAGAAAATGAATCTAGTAGCAAAGGCTACAAACAAAAG
TCAATGAGATGGATTAGATGGATACCAAATGGTGCTCCAAAGAAGGATTTGAATAGGTCA
ATCACTACAAAGAATGACGTTGGGAGTATCAGTGAAGATACTATGGTTGATATGAAAGAC
TCAGACAATCAAAGTCCTGGGAAAGCACCTATGATTAAAGTGAAATGA
>1fc22b1a-4217-468d-bf3d-33bd7ffc3ac9 (mRNA) 1473 residues [BFAB_07:544696-546989 + strand] [cds] name=Bfab07g01470.1
ATGCAATCTCTGAGCAGGTTTCTCACTGATGCGCAAATGGCATGGTTGACATCTTCCATC
AATTGTTGTGCGGCGGGGGACGAAGTGGAGAGCTGTGAACCAGAGAAATCAATGCGAATA
ATAAATGGACAGCCTCAATTAATATCCCCCCCATTGTCACAATCTCCAGAAAGGCCACCA
ACAGCATCTGCTTTTGAAAGACCAGATACTCGAGGAAAGGAGCGAGCGAGAACTCGATCG
AGGACGTCAAGTCGTGGAAGCAGCTTTACTTTGAAAAGAAATGTATCATCTCGTGCTTCC
AATCGAATGGTGATTAGTGCGCCATATAACTTCCAACATCATACGGAAACGAGTTATGTG
AGAGAGCCCGAACGAGTCGTACTTCGAAAAGAACCGAGATTGCGACCGTTGGAATTGAGT
ATATACTTACCAGGAAATCGATTATCACCACTGCCTGAATTTGGACCTCACTTCAATGAA
GACAAGACGAATCGTCCTTTGGTTCATATGAGAAGCGAGTCAGCGTTGGAATTTAGGGTA
CCTAGAAAGCCAGTCCTATCGACAGTCATGGAAAGGAGATCAATGAACACTGAGGAGTTG
TTGAATGCTTTGTCAAATGATCTGCCTCACGAACGTCCTACACGATTGAGAGCAAACACA
GAACCACTTGCGTATGAGAGAGTCAAGTCCGCGTTACTAGAGAATATGGAATTGGACAAA
AAGTTAAAAGAACTTGATGATGCTATCGAGAGACGAAGTATTTATCTAGCCAGTCGACCG
GTAAGTCATGCAAGCCGAGCCGAAAGCCGACAAGAAAGACGCGAGAGTATATACTCGGAG
TTCACAGAACCCATGCCAGCCATCACCGAGCTGCCACTCCACCATATCGATCATCGTCCT
CAAACCGCACCCTCTCGTCCTCGTCGCATGAAGTCCCTAGACTCTTCTCTGCACGCACCC
AAGCTTCTCAAAGAGCGTCCATTACCTCCCCCTCTTCCATTAGTTCTCCAAACACCTCAA
ATTACAAATCAAAGAAAATCTCTATCGCGGGTCTCTTCCTGGTTATTCCCATCTGGTTCG
GAACAACAACACTCCCGTCACATGTCCCTCGATTCCGTTACCAACACTCCCAAACCCGTA
ACATCTAGAGATGGCTTCTATCAATGCATCGAAGTCAAAGAAGTTCATAATCCACACAGT
GTTAGTAGTGTGAGCAGTATCAGGAGTGAAGTTGACGGCAATGAAGATTACGAAGCGACG
AGTTGGAGTGATAGTCCAAGTCTGGGATATGGGCCTAGATATGCGCGTGGATTGGGGTAT
GAAGTGAGAATCGGTGCGGATAGTAAGGGGTTGCAGGTAGCGCCACCAAGTAGAGATGGA
GCGAGAACATTCGGTGGAAGTGAAAAGGGTGAGGAGGCAAGATGGAGTATGGCTTATGGA
TATGGAAAAGATAGTGTTGGAGTCGCAATTTGA
>af6751c2-4cf0-4113-9470-67c6ff6a7def (mRNA) 3531 residues [BFAB_07:549664-554246 - strand] [cds] name=Bfab07g01480.1
ATGGCCTCAATGAATAACAACTTCTCTGGTAATTTCCCAACCCTCGCAAACGGAGAGTCC
CTGCATTCACACCAAGGGAAACTCTCTGGAAGTTCAGACCTACGCCCAAGTTACCCTACC
GATTTTGATAAACCTGTTACTTACAATTTCTCTGTCGCACAAGGCCAAAACCCTCCAAGA
TCGAGACCGAATCAAAATGAGAACAATCCTGGTATACCACTTTCGAACGGTCATGCCGCA
AATGCCCAAAATTGGAGTCCCGCGCAACTGCTAAATCCTCGAAGCATTAATCAAAACTCA
CGACCCTCGCCCAGTTCATCACCTCATCCCCAACCAAAATTTACACCGGCAGCACCTGCT
CCCCAGCCTCTATTTCAGTTCGACGCGCCCGGCGGATCGTATACGCCGTCACCTCCCGCG
AACCCGAATTATAACGTGAACTCGTACTCGAATGGGCAGAATGGCTTTGCACCATACGCG
AACCCAAGTGGGCAAATGCCAGGCATGGGAAGTTTCGTGGATCGAATGCATAATATTACA
GATCGCGACATGGTACCTCAAAAACGCCGAAGAGTAGAAGACTTGACCGGAGAGGGAAGC
AGAGCACAATTTAATGGAAGTTCTAGTGGAGGTGCATACGGACAATATGTGAAAAACAGG
AGGGTTGAAGGCTCGAAGGATGGCTGTACCAAACAAGTACTCGACTTATCTTTAGTGGAT
GACGATGATGTTGTAGTTGTCGGGAATGAACAGGATAGGGAAGTTTGCTACGGACGTATT
GAAGGATCTCAACTCAACGCTCATCGAGTACCAACCCCAAAACCTGGAGCCCAATCACTT
ATACCTGAAAACTGGCCGCAGATAAAGATTGTCTTGCGAAGGAAGGAAGGGGATAAGACA
AATAATATTCACGCTCTCGATTGTACTCGCGAAATTATTGGCTGCGTCGATGTGAACACT
GCAATTGGACTCGCTCCTATTCTCGACTCCCCCAAAATGGGTGTCAGAACAGCTGCCCGT
ATTCTTACAAGAAGGAAGGCGCCTGATGATCAGCCCGTGGGTTCCCCATGCTCTGTTCGT
TACAATCTGGATTTGAATCTTTACGGTCCAAAAAAGTACGCTCTTCAAATTGGTCGTCAC
CTCTCTCACAAGCAATTGTGGTTACGAACCCCACTTTCTGTAGAAGCCGGCATTCCATTG
CACAATCCCCATGCTATAGAAAAACCTTCAAGGGCCTTGCAGCCCACATCTAGTACATAC
TCGTCTTACGCATCTCGTTCTCAAGCCCCTGTTCGGACAACGGAAGAAATTCGAAATGAC
GTTTTGGGAGTTTTCGACTCATTGCCGAGATCTGAGAATTTACCAGAGATGGAGCCAAGT
TCTTTAATTACTACGGAGCTGCTCAAACATCAGAAACAGGGTCTATACTTCATGATGAAT
AGAGAAAAGGAGCGAAATTATGAGATGAATGACAAATGCGATTTGTGGAAACTTAGACAT
GGGAACAATGGCCAGAAGATATACTATAATGTCATCACCGGTGACGAGGAACGCAAAAGT
CCACCACAGGTACTTGGTGGAATTCTTGCCGATATGATGGGACTTGGCAAAACTCTCAGC
ATTCTCTCCTTGGTAGCTACAACGCTGGATGATTCAAAAGAGTGGGCGAAGCAAAGACCA
TCACAATCCGATCAGAGAGAGCAGCCAGTTCTCAAATCAGGCAAGGCTGCCTCTCAGCCC
AAGTTCGAACCTGCAACTCTCGCTTTGAACTGCAAAACTACCCTTTTAGTTGCTCCGCTC
AGTGTCATTTCTAATTGGGAAGATCAGATCAGGGCACATATCAAATCCGATGCTTTGAAG
TATTACATCTATCATGGCGCTAATCGCATCAAGGATGTTACGAAATTGTCAGAATATGAT
ATGGTCATTACTACATATGGTTCTGTGGCTAGCGAATGCAATAACCGGAACAAGAAGAAA
GATGGTAAATATCCTCTCGAGGAGATGAATTGGTTTCGAATTGTACTCGATGAAGCTCAT
ATGATCCGGGAACAATCAACTTTGCAATTCAAGGCTATTTGTAGGCTTTCAGCACAGCGT
CGATGGGCATGCACAGGTACACCAGTTCAGAATCGACTTGAGGACTTGGGTGCATTGATG
AATTTCCTTCGCGTCAAACCATTTAACGGAAGTGGGTTTGCCCAACATATACTATCCCCT
TTCAAAATTTGCGATCCTGAAATCATTCCCAAACTTCGATTGTTAGTTGACAGCATTACT
CTTCGTCGACTTAAAGACAAAATAGACCTTCCTAAGCGTCATGATCAGATTGCTAGGCTA
GATTTCAGTGATGAAGAGCGTATGGTTTATGATATCTTTGAGAAAAATGCAACAGATAGG
CTTAAAGTTATTACTTCTCAGGGAGAAAGCGCATTGGGAGGTAAAACCTTTCATCATATT
TTGCAATCAATATTGCGTCTTCGTCAAGTCTGCGCTCATGGCAAGGATTTGTTGAGTGCC
GAGGACTTGAAAATCATGAACGGTCTAAGTAAGGACTCTGCTATCGATCTTGACAGTGAA
GAATACGAAGATCACGATGGAATGACGCCCAAGCAGGCTTATGAAATGTATAAGTTGATG
AGAGATACGGGTACAGACAGTTGCTTGACATGCAATCGGAAGATTGGTCCTCAGGATGTT
GCTGACTCTGATGGCGAATCTAAGGAAGAAGTGATTGGTTACATGACACCATGTTTCCAC
ATCATTTGTGGCTTGTGTATTGGTGCTTACAAATCTCAATTGGAAGAGTTGGCTGTTGGT
GGTTCTTTAGTCGGATGTCCTACTTGCCACCAACAAATTTCCCCGTCCATGTTCTTTTCT
CTCAAACAAGAGGAAGTAGATAAGGAAGAAGAATCCCGATTGAAGACCAAGGAATCGGCA
AAAGCGGGCAAGGATTTGTCGAATTATGGTGGACCTCATACCAAGACAATAGCTCTTATT
CATGATCTTCTAGCATCCAGAAAGGAATCACAAGCAAGACCGAACGAGCCACCAATCAAA
AGCGTTGTATTTTCTGGTTGGACAACTCACCTTGACCTTATTCAACTCGCTTTGCAGGAG
AATAATATCCCTTACACACGTCTCGATGGTAAAATGACTCGTATCGCTCGCTCGACGGCC
ATGGAAAATTTTCGCGAAGATCCATCAATCGTTGTTATTCTAGTTTCCATCGCTGCCGGT
GGTCTCGGCCTCAATCTCACTACAGCTAATAAGGTCTATGTTATGGAACCTCAATTCAAT
CCTGCAGCGGAAGCTCAAGCCATTGATCGTGTACATCGATTGGGTCAAAAGAGAGAGGTA
CAGACAGTAAGATTTATTATGAATAAAAGTTTTGAGGAAAAAATGCTGCAAATTCAAGAT
AAAAAACAAAAGCTGGCGAGCTTGAGTATGGATTCGCAGAAGGGAAGGTTAGATAAGAAG
GAAGCGTCGATTAGGAGATTGGAAGAATTGAAAGATTTGTTCAGGAAGTAG
>d977eee1-c2c2-4145-9e79-847726b03ad2 (mRNA) 3396 residues [BFAB_07:549656-554246 - strand] [cds] name=Bfab07g01480.2
ATGGCCTCAATGAATAACAACTTCTCTGGCCAAAACCCTCCAAGATCGAGACCGAATCAA
AATGAGAACAATCCTGGTATACCACTTTCGAACGGTCATGCCGCAAATGCCCAAAATTGG
AGTCCCGCGCAACTGCTAAATCCTCGAAGCATTAATCAAAACTCACGACCCTCGCCCAGT
TCATCACCTCATCCCCAACCAAAATTTACACCGGCAGCACCTGCTCCCCAGCCTCTATTT
CAGTTCGACGCGCCCGGCGGATCGTATACGCCGTCACCTCCCGCGAACCCGAATTATAAC
GTGAACTCGTACTCGAATGGGCAGAATGGCTTTGCACCATACGCGAACCCAAGTGGGCAA
ATGCCAGGCATGGGAAGTTTCGTGGATCGAATGCATAATATTACAGATCGCGACATGGTA
CCTCAAAAACGCCGAAGAGTAGAAGACTTGACCGGAGAGGGAAGCAGAGCACAATTTAAT
GGAAGTTCTAGTGGAGGTGCATACGGACAATATGTGAAAAACAGGAGGGTTGAAGGCTCG
AAGGATGGCTGTACCAAACAAGTACTCGACTTATCTTTAGTGGATGACGATGATGTTGTA
GTTGTCGGGAATGAACAGGATAGGGAAGTTTGCTACGGACGTATTGAAGGATCTCAACTC
AACGCTCATCGAGTACCAACCCCAAAACCTGGAGCCCAATCACTTATACCTGAAAACTGG
CCGCAGATAAAGATTGTCTTGCGAAGGAAGGAAGGGGATAAGACAAATAATATTCACGCT
CTCGATTGTACTCGCGAAATTATTGGCTGCGTCGATGTGAACACTGCAATTGGACTCGCT
CCTATTCTCGACTCCCCCAAAATGGGTGTCAGAACAGCTGCCCGTATTCTTACAAGAAGG
AAGGCGCCTGATGATCAGCCCGTGGGTTCCCCATGCTCTGTTCGTTACAATCTGGATTTG
AATCTTTACGGTCCAAAAAAGTACGCTCTTCAAATTGGTCGTCACCTCTCTCACAAGCAA
TTGTGGTTACGAACCCCACTTTCTGTAGAAGCCGGCATTCCATTGCACAATCCCCATGCT
ATAGAAAAACCTTCAAGGGCCTTGCAGCCCACATCTAGTACATACTCGTCTTACGCATCT
CGTTCTCAAGCCCCTGTTCGGACAACGGAAGAAATTCGAAATGACGTTTTGGGAGTTTTC
GACTCATTGCCGAGATCTGAGAATTTACCAGAGATGGAGCCAAGTTCTTTAATTACTACG
GAGCTGCTCAAACATCAGAAACAGGGTCTATACTTCATGATGAATAGAGAAAAGGAGCGA
AATTATGAGATGAATGACAAATGCGATTTGTGGAAACTTAGACATGGGAACAATGGCCAG
AAGATATACTATAATGTCATCACCGGTGACGAGGAACGCAAAAGTCCACCACAGGTACTT
GGTGGAATTCTTGCCGATATGATGGGACTTGGCAAAACTCTCAGCATTCTCTCCTTGGTA
GCTACAACGCTGGATGATTCAAAAGAGTGGGCGAAGCAAAGACCATCACAATCCGATCAG
AGAGAGCAGCCAGTTCTCAAATCAGGCAAGGCTGCCTCTCAGCCCAAGTTCGAACCTGCA
ACTCTCGCTTTGAACTGCAAAACTACCCTTTTAGTTGCTCCGCTCAGTGTCATTTCTAAT
TGGGAAGATCAGATCAGGGCACATATCAAATCCGATGCTTTGAAGTATTACATCTATCAT
GGCGCTAATCGCATCAAGGATGTTACGAAATTGTCAGAATATGATATGGTCATTACTACA
TATGGTTCTGTGGCTAGCGAATGCAATAACCGGAACAAGAAGAAAGATGGTAAATATCCT
CTCGAGGAGATGAATTGGTTTCGAATTGTACTCGATGAAGCTCATATGATCCGGGAACAA
TCAACTTTGCAATTCAAGGCTATTTGTAGGCTTTCAGCACAGCGTCGATGGGCATGCACA
GGTACACCAGTTCAGAATCGACTTGAGGACTTGGGTGCATTGATGAATTTCCTTCGCGTC
AAACCATTTAACGGAAGTGGGTTTGCCCAACATATACTATCCCCTTTCAAAATTTGCGAT
CCTGAAATCATTCCCAAACTTCGATTGTTAGTTGACAGCATTACTCTTCGTCGACTTAAA
GACAAAATAGACCTTCCTAAGCGTCATGATCAGATTGCTAGGCTAGATTTCAGTGATGAA
GAGCGTATGGTTTATGATATCTTTGAGAAAAATGCAACAGATAGGCTTAAAGTTATTACT
TCTCAGGGAGAAAGCGCATTGGGAGGTAAAACCTTTCATCATATTTTGCAATCAATATTG
CGTCTTCGTCAAGTCTGCGCTCATGGCAAGGATTTGTTGAGTGCCGAGGACTTGAAAATC
ATGAACGGTCTAAGTAAGGACTCTGCTATCGATCTTGACAGTGAAGAATACGAAGATCAC
GATGGAATGACGCCCAAGCAGGCTTATGAAATGTATAAGTTGATGAGAGATACGGGTACA
GACAGTTGCTTGACATGCAATCGGAAGATTGGTCCTCAGGATGTTGCTGACTCTGATGGC
GAATCTAAGGAAGAAGTGATTGGTTACATGACACCATGTTTCCACATCATTTGTGGCTTG
TGTATTGGTGCTTACAAATCTCAATTGGAAGAGTTGGCTGTTGGTGGTTCTTTAGTCGGA
TGTCCTACTTGCCACCAACAAATTTCCCCGTCCATGTTCTTTTCTCTCAAACAAGAGGAA
GTAGATAAGGAAGAAGAATCCCGATTGAAGACCAAGGAATCGGCAAAAGCGGGCAAGGAT
TTGTCGAATTATGGTGGACCTCATACCAAGACAATAGCTCTTATTCATGATCTTCTAGCA
TCCAGAAAGGAATCACAAGCAAGACCGAACGAGCCACCAATCAAAAGCGTTGTATTTTCT
GGTTGGACAACTCACCTTGACCTTATTCAACTCGCTTTGCAGGAGAATAATATCCCTTAC
ACACGTCTCGATGGTAAAATGACTCGTATCGCTCGCTCGACGGCCATGGAAAATTTTCGC
GAAGATCCATCAATCGTTGTTATTCTAGTTTCCATCGCTGCCGGTGGTCTCGGCCTCAAT
CTCACTACAGCTAATAAGGTCTATGTTATGGAACCTCAATTCAATCCTGCAGCGGAAGCT
CAAGCCATTGATCGTGTACATCGATTGGGTCAAAAGAGAGAGGTACAGACAGTAAGATTT
ATTATGAATAAAAGTTTTGAGGAAAAAATGCTGCAAATTCAAGATAAAAAACAAAAGCTG
GCGAGCTTGAGTATGGATTCGCAGAAGGGAAGGTTAGATAAGAAGGAAGCGTCGATTAGG
AGATTGGAAGAATTGAAAGATTTGTTCAGGAAGTAG
>9f581a42-e3cc-40d2-b225-9cc23d7d3321 (mRNA) 1002 residues [BFAB_07:555966-557219 - strand] [cds] name=Bfab07g01491.1
ATGGCAGACAATAAGAGCAGAATTCCCTCGTTACGACTACAGCCTCTGTCAGTCGATTTT
ATTGATAATCGACTGTCTCAGTATCGTCCAGCTTTTGGCCATCCACCTTCCCATTTCGAT
CCAGTCAGCGGCAATTTCTATGCCGATAAAGTTTACACCCAAACCATATCAAGATCCGGC
AATCTTAGCCTTCCAATGCGCACTCAATCGAGAAATGTTGGAAATACAGAGCCTCAGCGT
AGTGGATCACATCAAGCTTTGTTTCCAGAAATGATGACGAATTTTATAAAAAAATACGAC
AAAGAACCAAAGGGGAGATGCAACACAGAATACACTATTCGAAGCCAAACAGATTGGGAT
GGGGTACTGCAAATACTTATTGCAGCTCAAGCTACCAGAGGTGATGCTCGATTCGGAGTC
ACAAGAAAATTAAAGGAATTAAAGGAGAAACTAAATGCCCACGCTACTAAAGTCAAGAAA
CTTGTCCCTTTAATCCCAAGCAATACTTATACATCGCCCGTGATCATTGTGTTGAACGTG
ATATTTGATGCTATGAAAGCGTCCAACACTGTTCGAGAAGAGCTCTTGAAATCAATGGAC
AGTTTTCGTGACTCTTTTGAGGTTATTGGGACCTATTTTTCAATTTATCATGGATTTCCG
GAAGTATCAAAGGCAGCTATATCCTTGGGAGTTGCCATCTTGAAAGCAATTGAAGAGGTG
ATTGGTTACTATCTTCAACACGCAGTATTTAAAGCATCGGAGGCGCTTTGGGATGGTGAA
GATTACAAAAAATCAATCACAACGAGTCTCGAAGATACTACTATGCATGGGAAGCGTCTT
CATCTTGAAGCCCAGAGGGCCAATTTCAGGGAAAATCACGAGACACACACTGGTGTGATT
GATGCAAATAATGGTATCCAACAAGGTACAGCCCTTCTAATGAAACTTTATAGATCAAAC
TTAACTTTCCGTTCTGACCTGAAACATTCGAGTTCACACTGA
>e2b0ba5d-a107-4b7d-9fe0-cec755aad5c3 (mRNA) 2328 residues [BFAB_07:559660-562311 - strand] [cds] name=Bfab07g01510.1
ATGCCAAGATTTCGTCCAGCTACTACGGGTTATGCCCAAATTGCCCAAGCCGAAGAGTTC
AGCGATGACGAAGAGGAGGACCCCCTCGCTGCCAGCCATGCTTCCTTACAGCCAGCAGGC
GCACCACGATATGCTTCTATTTCACAGCCTCGACCGCATGGTGGAATGTATACCGATGGA
TACAGCTCACCGACAAATAATCGAAAGTTTGGGCACACGAGAAGGCGAAGTCGTATGGGA
AGCAATGCCTCCGGTGTGGACATCAAAGCTATAAATGCTAGATTGGAACGATGGGCAGAC
GAGATAGCGTCCAAGTTTAAAATCAATAAGGTAAAAGGGAAATCACATCAGGAGGAAAAA
CTGGAAATCCAGCACTCAGTATTTCAAGCACCGGAAGGCATGCGACCCCTCACTGCCGAT
ACTTTGGCATCAGAACCCGATCATGGACGAATGACGAAATCCGAATTTGACGACGTTGTT
GAAAGTGTTCGAGTTGCGATCGAGCAGGGGATGCATCCAAAAATGATATCTCAGGGTAGT
TCTGGAAGTTATTTTGCTCGAAATAGTGATGGAAAAGTAGTCGGTGTGTTCAAGCCGAAA
GATGAGGAACCGTACGCCGCAGGAAATCCGAAATGGAACAAATGGATCCATCGCAATTTA
TTTCCATGCTTCTTTGGAAGAGCATGTCTAATTCCCAATTTGAGTTATGTCTCCGAAGCT
GCAGCATACACGCTTGACTGTAGGCTACGAACCCACCTTGTGCCCTACACCGACATAGTT
CACTTATCGTCGAAATCTTTCCATTATGATTTTTGGGATCGAAGGAAGTTTTACAGGAGT
AAGAAGCCTCTGCCTCCAAAGGTTGGCAGTTTCCAAGTCTTCCTCAAAGGTTTCAAGGAT
GCGAATATCTTCCTCCGTGAACACCCTTGGCCAGATCATGCAAATGGAACATTCAGAATG
AATGATACTCACAGAAACAAAAGAGGGTGGAAAGAGACTTGTCGTCCAGGTTCATCAAAG
TCAGACGAGGGTAATGAAGGGGCAGGGGCTAGCAGTCCTTCCGGATCTGGAGATGATAAC
CAAAATCGACGTTTTGTTTGGACAGATGCATTACAACAATCATTTCGAGAGGAGTTGGAG
AAACTAGTTATATTGGATTATATAATGCGAAATACAGACAGAGGCCTTGATAATTGGATG
ATCAAAATCGACTGGGAAACTCAGGGCGTTTCCATTGTTTCAGACCCTCCGCAAATGAGG
AACAATCCAGATTCAGAACAGCCACCTCGAGTAGTTTCTAGCTCTGACAACATCAGTATG
TCCCATCTACCGGCATATCCCTACCGTAGTCAAGAGCCTATGGAAGCTACAAGTAGGTCG
GCAACACCGTCTAGAATGGCAGCACCAACAATGTCTATTGGTGCGATTGACAACAGTTTA
TCGTGGCCTTGGAAGCACCCCGATGCTTGGCGAAGTTTTCCCTTTGGATGGTTGTTCTTA
CCTGTATCACTGATTGGACAACCATTTTCACAAAAAACTCGGGAACATTTTCTTCCTTTG
CTAACTTCAAAGCAATGGTGGAGCGAGACTCAGCTAGAGTTAAGAAAGGTTTTCAGTCAA
GATGCGGATTTTCAAGAACGCATGTTTGCTAGACAAATTGCTGTCATGAAAGGACAAGCT
TGGAATGTCGTGGAAACCCTCAAAACAGTAGACCATGGTCCTTTAGAATTGACTCGAAGA
CCGAGAGTTTGTGTTTGGGATGATCTTGTTGATATACCTGTTGCGGTTCCTATGAGAGTG
CCTTCTGCAGAAATGCGAAGGCGTAATGAGGCTCGCAATAGCCTTGATGATGAGATGGAT
ATTAGTGCCGCCAATGCGACAGCACCGCAACCAGATCTTCTTGGACTTGCAAGTCCATCT
ACAGAATTACCCAATCCAAATCGGTTCGAGTTAGCTAGTCCACGATATAGTGGAGATGCT
TCCCCTGACCTCGAGTCTTCTCAAACATTTGCAAATTCAGGATTCTCTCGAGATAATACT
TTCAAGGATGGAGTGAGGTTTTCGGATCGACCACACCTTCAACATTCTAGAAATCGTATG
AGTTATGATGGACCTGCAAGGTCACCAAATGGCAATCGTTCAGAATCGAGAAGATTCTCG
TTTAGCTCGAGGAGTCGTGGAGCTGTTCAGACATTGTACGACGGTGATGATCTTGAAGGG
GACTTGGGATATGCAGCAGCTGAAGGGATGGAGGGACATCAGAGGAAGGTGATAGTAGAA
AGACTTGAAACAGTCAAAAGCAAAAACCCAGTTTTTACATGGTGTTAA
>593f7254-aed3-41e1-a6c1-1d8bcf04311e (mRNA) 540 residues [BFAB_07:562566-563503 - strand] [cds] name=Bfab07g01520.1
ATGTTTTCACGACCAGCTGTTAGAGCTTCGAGGATTTGCTGCCGCTACTATGCAAGCCCT
GCCAGTACCCCTCCGCCTATGCTCTTGAAGATCAGGAATGATATGAAAACTGCCATGAGA
AACAAAGATAGCAATCGACTCTCAGTCCTTCGATCGCTTCTCAGTCAAACACTCAATGCC
TCTAAGACTTCCTCGCCTATCAATACCGATATGCAAATGTTAGCTCTCCTCCGAAAGACT
GCGAATGCCAGTCGCGCTGCAAGTGAAGAGTTCAAGGCAGCAGGTAGAGAGGATCTCGTT
GAGAAGGAAGAACAGCAATTGAAGGTCTTGGAAGAATATGCCAGTGGTGTTGAGACAGTT
GGCGAGGAAGAGATCAGAAACACAGTCAAGGAACTTGTCAACGCAATGAAGGCTGAGGGG
GTCAAGATGCAAATGGGAGATGTGTTGAAAAGAGTGTTTGCTCCTGAAGTATTGGGAGAA
AAGAATGTAGAAAAGGGGGAGGTCGCAAAGATAGTAAAGGAGATCATGGCAGCATCGTAA
>b907cddf-7c7a-4f5e-9aaa-862129925099 (mRNA) 540 residues [BFAB_07:563940-565307 + strand] [cds] name=Bfab07g01530.1
ATGACACCCATTGACCCTCGCCCCGCAACCCACCTACCTTCCAACGAACCCTCTCCTCAC
CGCGGTCGTAAACGTCGTCGATCATCTGCGGCTTCTCCACCACCCATCACAACCAGTACA
TCCACGAATTTCCGAGGTCGAGTTCGTCACCGATCACCTCAGACATCTCATTTGACAACA
TCCTCGCAATTGCCATTATCCTCGCCCCTCAATATCAAATCAACGAACGCAAATGCAACT
ATGTCATCCCTTACAGCCACAGCCCCTAAAGTCAAATACCAAAAGACTCGCGCCTCAGCA
ACGACAACAACAACGACTCCCTCCCCATCATCATCTCTCCTGCTTTGCTCTCCACGCTCA
AAGACCCGGAGAGGCCAATCACCCTCCCGTTCTCGTAGCAAAGACCATTCAGATGACAAG
GAGGTTCCCAGGAGAAGACAGAGAACCAGAAGCAGAAGTCGATCTCACAAAGTCGCGAAT
GATGAGAAGGATAGCAGTAAAGGAAAAATGAAAGCTGTATCCGGGACAGAAAGAGCTTGA
>f94de115-9c8d-4451-b896-aa095fda984b (mRNA) 2535 residues [BFAB_07:566506-569824 - strand] [cds] name=Bfab07g01540.1
ATGGTTAACTTCACCGTTGAGGAGGTCCGCCAATTGATGGACAAGGCTACGAACGTTCGT
AACATGTCCGTCATTGCCCACGTCGACCACGGAAAATCTACCCTTACCGATTCCTTGCTC
TCCAAGGCTGGTATTATCTCCGCCGCAAAGGCTGGTGATGCCAGAGCTACCGATACTCGT
GCCGATGAACAAGAGCGTGGTATCACCATCAAGTCCACTGCCATCTCCCTCTACGGTAAC
CTCGCAGACGATGAAGACTTGAAGGATATTGTCGGCCAAAAGACCGACGGAAGAGATTTC
TTGATCAACTTGATCGATTCACCTGGTCACGTTGATTTCTCCTCTGAAGTCACTGCTGCT
CTCCGTGTCACTGATGGTGCTCTCGTTGTCGTCGATACCATTGAAGGTGTTTGTGTGCAA
ACCGAGACTGTCCTCCGTCAAGCTCTTGGTGAGCGTATCAAGCCTGTTGTTATCATCAAC
AAGGTCGATCGTGCTCTCCTCGAGTTGCAAGTCTCCAAGGAAGATCTTTACCAATCTTTC
TCCAGAACCATCGAGTCCGTCAACGTCGTTATCTCTACCTACTTCGACAAATCTTTGGGT
GACGTCCAAGTTTACCCAGGTAAGGGAACGGTTGCTTTCGGTTCCGGTCTCCACGGATGG
GCTTTCACCATCAGACAATTCGCTCAAAGATACGCCAAGAAATTCGGTGTTGACAGAAAC
AAGATGATGGAGCGTCTCTGGGGCGACAACTACTTCAACCCACACACCAAGAAGTGGACC
ACCAAGTCTTCCCACGAGGGTAAGGAGTTGGAGCGTGCTTTCAACCAGTTCATCCTCGAC
CCTATCTTCCGTATCTTCGCTGCTGTCATGAACTTCAAGAAGGACGAGATCCCAACTCTC
CTCGAGAAGCTTAACATCAAGCTTTCTGCAGATGACAAGGACAAGGAGGGCAAGCAACTT
CTCAAGGTTGTCATGCGTACTTTCTTGCCAGCTGCTGATGCTCTTTTGGAGATGTTGATT
CTCCATCTCCCATCCCCAGTTACTGCCCAAAAGTACCGTGCTGAGACCTTGTACGAGGGT
CCTCCAGATGATGAGGCCTGCATTGGTATCCGTGACTGTGACCCCAAGGCTCCTCTTATG
TTGTACGTCTCCAAGATGGTACCAACATCTGATAAGGGACGTTTCTACGCTTTCGGTCGT
GTCTTCGCTGGTACCGTCCGTTCCGGTTTGAAGGTCCGTATCCAGGGTCCTAACTACACC
CCTGGCAAGAAGGACGATTTGTTCATCAAGGCCATCCAACGTGTTGTTCTCATGATGGGT
GGTAAGGTCGACCCTATCGATGATGTTCCAGCCGGTAACATTCTCGGATTGGTCGGTATC
GATCAATTCTTGTTGAAGTCTGGTACCCTCACCACTAGTGATACCGCTCACAACTTGAAG
GTCATGAAGTTCTCCGTCTCCCCTGTCGTCCAACGTTCAGTCGAGGTCAAGAACGCTCAA
GATCTCCCCAAGCTTGTCGAAGGTCTCAAGCGTCTCTCCAAGTCCGATCCTTGTGTTTTG
ACTTTCATCTCCGAATCCGGTGAGCACGTTGTTGCTGGTGCCGGTGAGTTGCATTTGGAA
ATTTGCTTGAAGGATCTCGAGGAGGACCACGCTGGTGTTCCTCTCCGTATCTCCGACCCT
GTCGTTCCATACCGTGAGACCGTCACTGGCAAGTCCAGCATGACTGCTCTTTCCAAATCC
CCCAACAAGCACAACCGTCTTTACATGATCGCTGAGCCTCTCGACGAGGAGGTTTCCAAG
GAGATCGAGGCCGGAAAGATCGGTCCCCGTGACGATTTCAAGGCTCGTGCCCGTATCTTG
GCCGATGAGCACGGATGGGATGTCACTGATGCCCGTAAGATTTGGTGTTTCGGTCCAGAC
ACCAACGGTGCCAACTTGTTGGTTGATCAAACCAAGGCTGTTCAATACTTGAACGAAATC
AAGGATTCCGTCGTCTCCGGTTTCCAATGGGCTTCAAGAGAAGGTCCAATTGCCGAAGAG
CCAATGAGATCTTGCAGATTCAACATCATGGATGTTACCCTCCACGCTGATGCTATCCAT
CGTGGTTCCGGACAAGTCATGCCAACTACCCGTCGTGTCTTGTACGCTTCTACCCTCTTG
GCTGAGCCAGGTCTCCTCGAGCCAGTCTTCTTGGTCGAGATTCAAGTACCAGAATCTGCC
ATGGGTGGTGTTTACGGTGTTCTGACCAGAAGAAGAGGTCACGTCTTCGCTGAGGAGCAA
CGTCCAGGAACTCCTCTTTTCACCATTAAGGCATACTTGCCAGTCGGTGAATCTTTCGGA
TTCAACGCTGATCTCCGTTCCCACACCTCTGGTCAAGCTTTCCCACAATCCATCTTCGAT
CATTGGCAAATTCTTCCAGGTGGATCGCCAATTGACGCAACCTCCAAGACTGGACAAATC
GTCCAAGAGCTCCGTAAACGTAAGGGTATCAAGGTTGAGGTTCCAGGTTACGAGAACTAC
TATGACAAGCTGTAA
>5a8630d9-df71-4032-9c01-c34e35ff9db2 (mRNA) 9756 residues [BFAB_07:570789-581049 - strand] [cds] name=Bfab07g01550.1
ATGGCGAGCAGTAGTGGTTTGACAGCATCCCCTCTGCGAGCGGATCTGGGATTCAATTGG
ATTTTCCTCATCGAGTTGATTGTCTGTGGGATTGTCACATTATTCTTTCTTTTCTATTTC
AACCGTGTTTTTGCTGCTATCGTATCATTTGGTCTTCGAAAATGGACATGGCATCAATAT
CAAGTTTATGTCGACATCCAAGCTTTACAAATATCTCTCCTAGGAGGGCGTGTGTTTTTA
AAAGGTGTTAGATATCACGGCGACAATGAAACTATATTGATACAAAATGGATACATTACA
TGGAAATATTGGCTCCGCAATGTGAGAGAATTGGATTTAGAAAACGACGAATCTACAAAA
AAAGAGAAGGAACGGGAGTCGACTGTCGATACGGGACTAGATCACGAGGAGGGGCCGAAA
GAAAAGAAGAAACTACCGTGCCGATTCGATATCGTTTTGAACGGGGTGGAATGGTTTGTT
TACAATCGAAGTGCGGCATATGATGCTATTATCTCGGGAATTGCTGGAGATGATGAGAAC
ACAGATCGTGCTGCGCAGAGCCATGGAGAAGATTCCTATCAGCATGTGAGATTGAGAAAG
AAGGGCGTTGTAAATGAGCGTGGGGATGTGCAAGACTTGTCCAAGAAATCTACAGCCGAT
TCTCAAACCTTACCGTCACATATCGAAGAACAAGCTAAGCCTGGAGCACCTCACATAGAG
GATAAATCTGACAGATCTTCCGCGAATTCTCAGACAGCCGATATGGACAATGATGAGTCT
CATGCAACTGTGGAATCAACTTTCTTACTTAGGTTTCTTCCAGTTCATATAGAATGTTCC
AAAGCTGCATTGGTACTAGGGAATGAAAACACTAAGAGCGTGCTCATTGTTAAAATGGAC
AAAGCCGAAGGGGATTTGGACGCCTCAGCATCGACTAAACTGGATCAGTATAAACAGCTA
ATAAACTTTCGTTTCGAGCATCCTGTTATACAAATGCAACCGAATGATGATTACAAAGAA
GATCAAGCTACGGCAGCCTGTAAAATACAACGCGGGGTTCCTGAGCAGTCGGACGCTATT
GAAAGCCGCGTCCCTTCCCACAGCTTTTTCCATCGACAGCGCAAGAGAGCATGGCATACT
ATTCAAGACCTCGTACCTTACTTTCGAAGTTCTGTAGAATCTTTCTCGTCAAATGATGAT
AGCCGTTCGAACTCGCCCATTCAAAGAGGACCCAACCCTAGTAGCTGGCAAGGTCTCTCG
AGGTATCTGGATGAAAGTGAGCAGGATGATAATGCGCGGTGGTCTTCCAACGAATATGCA
ACAGTCACCACTATCGCTGATAGCCCTAGCGCTACTATGAGATTCTATTGGGATGTTCCG
GCTAAGATCCCATGGCGTCGTGAAGTATCAAAATCAGCATCTAATAACATCAATGGTGAT
GTTCCTCCTGAATGGGGGATTGATCTTGTTCTGGAAGGTGCAATTATCAATTACGGTCCT
TGGGCAGATAGACAGCGGGCCGAGATCCAACGAGTCTTCTTTCCAAGTCTGTGTAAAGAT
GCCTCTCCGGCCAAAATGCTTAGACCTGGCCAATATAGAGTGCCAACACAATTCAAGCTT
TACATTGAACTTGACCATGAAACGACACTTCGAGTGCCCATTAGAGAGGAATCGAAGAAT
TGGAAATGGACAAAGCAAGCAGAGACTGCTGGTGCCCGGCAGAACGAGCAAAAACGAACT
AGTAACAGAAATCGCAGGAGAAAGGATGACAAGGGGACCCCTGGGCCCGAGGTTAGACCT
TTTGGTTGGCTGGATATTAAGGTTGGCGCGAATGCAACGATTCGATACCTGATGGATATG
GTGGCAGGGGATGTTGGATTTTCAAACAAGCTTCAATTGGATTTGCCCAACACGGAGATA
ACTACAAGTGTTAATCACGGGCTACTTTGGAGATCTACTGGAAATGTGATTAGTTGTGAT
TTATCGAATCCCTTACAATGGAACGGTTTCCGAACATGGAATTTCGATATTGGCAGTCGC
GGACTGGAACTCTTTATTCTAAGGGAACACATCTTCCTCCTCACAGATCTTGTTGGGGAC
TGGGCCAGTGGCCCGCCGCCAGAATATCTCACGTTTACTCCGTTTCGATACTTGGTGAAC
CTCAATCTTCAGGAATTCAAACTCTACCTCAATGTCAATGACTCCAACATAATCAACAAT
CCTGCCGACTTTGACGACAATACCTTTATCATCATCTTCGGAGAGTCGCTGATTGCGGAC
ATTTGCATCCCCATCGATGCATTCCGACCTCACCGAAATGATATATCATTTGATGTTTTC
GCTAAGCACGGTGGTCTGAATCTGCATGTGCCCCCATGGAATACGCAGGCTACTTTTCTA
AATTCCAAAGAGATTGCTGAACTCGATTCCATAAAACTTGGAGGAAAATATCAATATTGT
GCAACCACTTCTTCCAGTAATACCGATACACTAATACTTGATGTGCATGGCAATGGGGCT
ACAGCGCAGTTCTATGGGTTCGTCATTCGATATTACCTCAAGGTTAAAGACAATTACTTT
GGTGATGATATCCATTTCAGGACCTTAGAGGAACACCAAGAAGCAATTCGTGTCAAAACC
GCCAACAGCCAACAGGACGCGAACGTTCAACCTCACAAGAAGAGCAACGATCTCGATGTG
ATCTTGAGCATATCTGCTGACGAGTCCAGTGTAATTTTACCCGCAAACTTGTATTCAGCA
AAGGACCATATTCGAATCGAGATTGCGACTCTGGCTGCCGATCTTCGCTTTACCAACTAT
TACATGGACTTGGATGTAGAGCTTGGCACACTAGCCTTCTCTTTGGGCACTGAAAGTGAC
AGCAGAATGTCTTTCGCTAGCGCAACGTCTGGTACTCAACTTTTCATTGACGGTCTTAAT
GTCTCGGGCAACCGCCTTTTTGGCCTACCTCCTATTGAACCGACTTATGTCTGTAATTGG
GACTTTAGTGTGGGCGCAATCACTGGCGAGTGTACAACCGAGTTCTTTGTGCGATTACTT
GGAAGTGTCAAGGCAGTTGCATTTTCCTTCGACGATGATGAAAATGCTCTGCCGCTGACT
ACCGAATTAATATTGCACGATGTAACATTTCTCCGTGCCTCGGTTGATTCTATACGAATT
TGGATACATGTCGAAGAGGCAGCGTTTCTTTTTTCCACTTCTAAAATTATGTTGAATTTC
GATGATTGGGCTGGGTCCCATTACTCCAAGAAGTTAGATCTTCAAATACCAAATCTGAAA
TTTGGTTGTGTTGATGCGGAATCAGCTTCAAGACACAGGTCAAGAGCACAACATCCCGTT
GAGACGCATGGCCTTATCCAAACAACGATCTCATTTGGGATGATCCTGAAGAAGCTTGCA
TTTGTAGAAGATCGGCGCCTGCAGCAAGCACACCTAAGACGTCATGATCGAAGAACGCAC
AGGACCGATTTTCTCTTACATGATTATGTTATGGCAGAGGTAGATCAAGATATTGTTGAA
CCGCCTGCAATGTGTGTTCCGCCAATGCCCCCTCCACTCTTCTACAGTGACGACCTTAGC
CAAGACAGGCCATCTACTTACAAGATGTCCTCCAATGTATCGTCGGTTCGTAGGAATCGA
CTTCAGACTGGGCGTAAAAGCTCATTCTTGACCGCTTCTAGTTCAAGCTTCAGAAGCGAT
CAGAGTATTCTTCGACCTCATTCATTTAATCGTGAGGGAACATCCATCTCTGCTTCACGC
TCCCGAAGTATACATGCTGGCCAATCACATCTCAGGGACCTTTCCGTTTCGACCGGTCGT
CAATCTTCATTCTATAGTGCTGTTGGCGAGCCTAGAAGCCTACCTCCCTCTAATGTTACC
TTCTCAAGCTCCTATATGGCACCATATTTTCCTCTTGAGGCTGTTGAACCTGATGTTAAG
GATCTTCCAGTTCTAGATCCAGAAGCTCAAACAGAAATCACCATGCAATCACCTCGCATG
AATTTAGAAGACATCCAGCCAGATCGAGTGGGCGAGAACGCCACTCACGTCAGCTTTATT
GTGGAAATGCCCGGTGGCATCAAGGCAGTGCTTAGCCCGAAAGCAGTGGGAGCTGTTGCG
GATTTGCTTACTGCAATACAGCCTGTAGATCCTGTGGATATGATAGATGATCTCCAGATT
AGCTCTATGGGAGAGATATTCGGCAAGGAAAAAAAAGACAAGGTACATGGCGAGGTTCTT
GATATAGCTGTGCGGACTCCAGGCATATGTCTTCGATTCTTAAATTCGCCCGATGCGCAT
GACTTGACCAGTGATAAAGATGAAACGCATGATCAGTATGATCTTTCTATTGCAAAACTT
GCTATTACCTCAAGAAGTGAAACAACTGGAACTTCGGACCTCATCGCCGCCCAAGCTGGT
CGGCAATCCTCTGCAATCCATTTATACCTCGGCTCTGCTGTCTTGGCTGCGAAGGAACGA
TTCGGTGATCTAAATGATCCTCAAGCAGGTGTGAACGTCATTCTTGAAGATGTAGTGTTC
TGGATTTCTTCTGGACATAACACGGCGGCAAATATAATTTTCAAAACTATAGAAGCCAAC
ACGGCTAGCAGTAAGATTGAATATCTTGCATCATTGGTCCATCGTACCAATGTCCTCGCT
GATCGTGTAAGTGAGACGTTTGCATCCAAATTAAGCCAACAACGAAATCGTCTACAACTA
TTCACATATCTCGTCGCGACTGCAGGGGAGCATGCCACAGATCCTTTATTTTTGACAAGG
CCGGCGTACGTCCTTCGAAGCGCACAAAGACATTTGAGAACCCATGATTCGTGGAAAGTA
ATTGCTCGGCTTCGACATATGTATTCAATACTTGGTCCATCTTCGCAACGCGATATCATT
AGCCGTTGCGCAAATAATTCAGAAAGCGTTCCAGAAGACGCTGCTCAGCGAGTTCTCGCT
AGCTTTTCTCAATGGAGGAGCTGGGATCTCAACAATCTTGGCACTTGTGTCTTGATGAGT
AATGTTTTCGGGTTTGTAAAAGATGATGCCACGGTAGCTGTAGCAGAAGCACCGAACTTA
AGCATATCATTTCGAACAGAACTTATAAGGCTTGTGATAGATCCAGGCCCGAAGCAAAAT
GAGGTTGCACTACGTTCTTTGTCGGCCAGGGTTTCGGTAACTACGAGTTTTCCCATGAAG
TCTCCAATATCTGTGTCGCAGCATGGCTCAGATATAGACACATTTCAGAACATTGTCGTG
CATGTGTTCTGTGAGGACATTTCAATCAATTTAAATTGGGAACTGTGTGAGCTTGTGCAA
GATATCTTGAAATTGTATCAACAGAGCGAATCAAACGCAAAAGTACCAGAAAAACCTTCA
CCAATCACGCTAGCTCGCCCAAAAGTGAAAGCTAAACAAAATCTTCAGGTCGTGATTGCA
ACCAACAAAGGTTCTATCACACTTGACACAATAAACCTCAGATCTGTTTCCATCAGTAAT
GGCTTGAAAGTATCTGTTGTTTCGACAGAGGACATTGCTAACACGACTATGGTCAACATC
ATGCTTGCCGCAGAAGCTGCGACCTCGAAAATTCAGAGTCATTCACAACCTTTAAGTCTG
TACCAGCTGCGAAATCCGAGTGTCTATGTGTCGTTCGAAAACTCAGTGCTCGACGAAACT
CCCCTCAACGTTTTTAAAGTTGCAGCAAACTCTCAAGAGTTGTCATTTATAGTCCAGCAA
GATATTGTCGCACTTATCGAAGTCTTAGACTTAGTGATTGGGGATGAAGTTGCGCAGCTG
AATCGTTTGATACCGAAACTTCCTACAGCCAAACGACCTGCATCGCCGCCGAACATTTTG
CTACCAAATGTTCAGGAACCAAAGCCCATCAACAGGATTAATTTGGCACTGTTCCTAAAT
ATGTATCAAATCAGCATACCTCTCATACAATCGTTGACATATACCATTTCAGGTGTTGTT
GCTAGAGCTTCCTTGGCAGCTCAGTTTGGGTCTGAAATTGTCTTTGATTTTGACATTAAA
GAACACTCACACGATGTGCAAACAGCCCAAAATGATAAACAACAAAGCATATCGTTATTG
CAAATGCCACCAACAAATGGTCGTGTCGTTAGCAGTATGTCCGTGGAAGAGAATAAGATT
TCAGTCTTTGCTTCTGTGGAACCCATAGAGCTCGATGCAGCTGCTGTTCATAGTCTCTTT
ACTGCACTCAATCGACCAGAAATATCTAGTGTTGTTTCTGATATCCGTGACGATATCAAA
GCAATACAAGCACATGTTGAGGAAATATTCGGTCCCAGCAACAGTCCAGTACCGGATTCA
CCGCCGAAAGCCGGTCCTGCTCTAATATACGATGCTCACCTGACCTTTGCAGGTTTGGAT
GTTTATGCAAACGCGGAACCTTCACGAGAGGGAAAAACCACTGCAAGACTTGAATTCAAC
GTTGGATGCGTGCAGCTTCTAGTTGCAAACAGGCTGGAGACACATGGGGCAACATATGAA
TTTCCAGAGATCCATATAAGTCTGCATCGAATCATGTTTGAGTTGTCTCGCCTCAACAAT
GGGACAATGGAACCTTGCGGAAATCTTGCATTCGCTGCTTTCTTGACTGCCACGAGTAAA
AAGAACGAAATTGGGGACGATGTTAGATCATTCAATCTTACTAGCAATGGCCTCGAAATC
AACCTTTTCGCCGAAACTGCATCTTCTGTGGTAGACGTCATGGGTCATTTGCAAAATAAA
ATCAGAGACATCGACTTCACTAGGGAAAAACAGTATTTGAAGAAATTTCGTAAGTCTAGA
CCAAGGATCACAGTCAACGATGAGCCCAAAGATCATGATAGCGTTGCTGGCTCAACGTCT
ACTATTATGTTTGCTTCAATGTACACTCTCGAATTGCTCAACATCCAAGTTAGTTGGCTG
GTTGGGAATACAGAAAACGATCGCATCTCGCAGTCTGAGAAGGAAAATCTGGTTCTTTCA
TTGAAACGCATTGATTTATCAACGAGGAAGGAGAATTCTGCTCGACTTACCATTGAAGAT
CTACAACTGCAAATGGTACCCTCGTCACAAGACAAAATCCAACGTTCGCTTAACTCAGCT
TTATTGCCAGAAGTTATCTTCAATGTTGGATATATCTCTGGTCAAAATACTCGTAGATTG
GCATTTCAAGCGGCAGGAAAATCACTTGATCTGCGACTGACTTCTCAATTCATCATACCT
GCCGCTGAGCTTCAACGATCAATTGGATCTGCTACCGAGATGGTACGGGTAGCATCAGCT
ACATGGAGTGCGAGCCCACCACCGACACTATTACCTCCAACGTCTCCCAACAAAAGGCAG
CCCTTCTTCGGGAAGAAACGTATGGAGTCTTTACTAGTGGATGCAGACTTTGCTGGAGCC
GTTGTATATCTGTCGGGTAGAAAATTGACAGAGACCACACAAACAAATCAAGCAGGCACG
ACGGGTCGCGTGCCTCATGCTGGAAGATATGGGCAGTTCACACATAAGGATGCGGGTAGT
AGCACAGTCTTACGTGCACCTGGCCTAGCTTGGAAGATAGAGTACACAGATAATGGCCTT
GATGACCCATCTCTGAATGCTGAGGTGAAAGTGGACGCTTCGACAAACATACTATATCCA
TCAGTTGTGCCTCTCATTCTCGAGATATCTTCTTCAGTCAAAGACATTGTAAGCGAGGAT
GGTAAGGATAAAAAGTCGGTTCCAAAAACATCACCACAAAAGTTCATAGGCGCCGATGAC
GATAACATTCTGGCAGCTGATCCCAGTACCGTCCTTGGCCGCACCCGCCTCAACCTAGGG
CTTAGAATCTGCAAGCAAGAATTCACTCTCAGCTGTCAACCTATAGCTCGTGTTGCTGCT
AGCGCGCGATTTGATGAAATTTATTTAACTGTCAACACGGTCCGATCGACCGAGCATGGG
CATTTCTTTGCTGCATCCGTTGCTTTCTCAAGGCTGCAAGCCTCAGTACAACATGTTTAC
TCCAGAGAATCTACGGGGAGCTTTGATGTTGAATCAATCTTCCTATCTCTCATGAATAGT
AAGCATGTGAGTGGTACCAGTGGAATGTCTGCAATATTAAAGATTAGCCCCATGAAAGTC
TTGATCAACGCCAAGCAATTACAAGATTTTTTGCTCTTTAGGGAGATTTGGGTTCCACAA
GAGTTGCGTGAAGGCTCTACAGCTCATGTATCATCAACTGACAATGTACAATCATCAACT
TTTCTCGTGCAGAGATACCAGCAAGTTGCAGCAACTGGTGCTTTCCCTTGGAATGCTACA
GTCTCCATTGCTGAGCTGGACGTTCAATTGGATCTCGGCCAGGCTATTGGCAAATCTGCT
TTTATTATATCAAATTTCTGGATCTCATCCAAAAAGAATTCGGACTGGGAGCAAAATCTC
TGTCTCGGCTTTGACAAAGTTGGTGTTGACAGTTCAGGCAGAATGAGTGGATTCGTGGCA
CTTCAGGATTTCAAAATGCGTACCTCAATCCAATGGCCAGCACGCGAGAAGGCACTGAAT
CAAACACCACTAGTCCAAGGCTCTTTGGGTTTCAGCCAATTGAGAGTTAAGGCTGCATTT
GATTATCAAGCCTTCTTAGTTGCGGACATCACTTCTTTCGAATTCCTTATGTATAATGTT
CGTAATGGCACGCAGGCAAAGGGAGATCGACTCGTTGCCATCTTAGACGGGGAAGCCGTA
CAGATTTTCTGCACGGCAACGACCGCATCACAAGCACTCGCTCTATACCAAGCATTCTTG
CGACTTGCTCAAGAGAAGAAGAGTAATTATGAAACGTCCCTTTCGGAAATTGAAAAATAC
ATTAAACGTAAATCGATCTCTCAGGCAATGACACCCAATCCCAAAGCACCTGTTACGGAG
CCGAAATTAAAAAAGTCGAAATCACCCGTCTCACTGCACACTGATGTGATTGTCACACTG
AAAGCATTGAATATAGGGGCGTTTCCAAGCACATTCTCCGACCACCAAGTCTTTAAAATC
GAGGCACTCAATGCACAGGCACGATTTGCGGTAACCATGGATCGGGGAAAGATTCATAGT
ATTTTAGGTCTCACTCTTGGTCAGCTTCGCATTGGGCTTGCTGGAGTGAAGCAAGATGAG
GCGCCAAAGTCCGTTAGCGACCTTTCTGTAGAAGATGTGGTCAATAGTGTCACGGAATCT
CGGGGCGGTACCATATTGAAAGTTCCCCAGGTCGAGGCCACGATGCAAACTTGGCAGGCA
CCTGGTTCCAACCACATTGATTACATATTTAAAAGCTCCTTTGAAGGGAAGGTCGAGGTT
GGATGGAATTATTCTCGTGTCAGCTACATCCGTAGCATGTACGGTGCACACACAAAAGCA
TTAGCACAAAGACTAGGAAAGCCTTTACCACCCTCGGCTCTGAAAATTACGGGTGTACCA
AACGCAGAAGATCCACAAAGTCAAGAGCGCGAGCAACAAAAGATTACAGCCGAAGTCAAC
GTTCCTCTATCGAAATACGAATACACAGCCCTTGAGCCCCCTGTCATCGAGACACCTCTC
CTTCAAAGTCTAGGTGAAGCAACGCCACCCTTGGAATTTTTTGGGTTACATCGAGAACGA
CTTCCAAATCTCACACATCAAATAGTGATTGTAGCGTTATTAGAATTGGCTGGGGAGGTA
GAGGATGCTTACGAAAAGATTTTAGGGTCTTCTTGA
>2fd9be69-70c7-418f-bd78-07fd2a99af37 (mRNA) 2016 residues [BFAB_07:581213-584112 + strand] [cds] name=Bfab07g01560.1
ATGATGGCAGGAAGCAGTGACCTATCCGGTGGTACTGGTGAGAAATTGACAAATGCAACA
ATAGTAGTAGCTGGTTCTGCTGCATTGCTTGCCTCTATTCTATCGATCGTGTCGGTTTGG
TTGCAAACTAAAAACTATCGAAAACCTCTCTTGCAACGCTATGTCATTCGAATCCTACTT
ATGGTACCGATATACTCAATCTCGTCATGGACTAGTCTAGTTTCTAGAGATGCAGCGATG
TTTATCGATCCTATTCGTGATGTATATGAGGCTTTCACAATTTACACATTCTTTCAACTC
CTTATAAACTTCCTCGGGGGTGAACGAGCATTGATTATTATGATGCATGGACGAGAACCG
GTTCATCACCTTTGGCCATTGAACCACGTCTTTCCCAAGGTCGATATATCCGACCCTCAT
ACATTCTTGGCCATCAAACGTGGGATTCTACAGTATGCTTGGTTGAAGCCTCTTCTTGGA
CTTTCAGCTATAATTATGAAAGCTACGGGTGTCTATTCTGAGGGTACCATTTCTTTGACC
TCCGGCTATATGTGGAGTGGTATTATTTACAACATTAGCGTCACACTAAGTCTATATTCA
CTCGGAATGTTTTGGGTTATCATGTCCAAAGATTTACAACCTTTTCGACCTGTGCCGAAA
TTTTTGTGCATTAAGCTTATTATATTTGCCTCATACTGGCAAGGATTTCTTCTTTCGATT
CTGGTTTTTCTCGGAGCAATTCCAGACAACGTGGAAGATTATACAGCCGATAGCCTCGCC
GCGGCAATACAAGATGCCTTAATCTGTATCGAGATGCCTATTTTTGCCATCGGACATTGG
TATGCCTTTTCATGGCATGACTATGCAGATGTCACTATATCTGCAGCTAGAATGCCGGTC
CGCTACGCTATTCGAGATGCTTTTGGCATTCGTGACCTCATCGAGGATACGAAAGAGACA
TTTAGTGGGAAGAAATATGAATACCGGTTGTTTGATTCAGGAGACAACGTATTGGCGCAT
GAAGGGTCATCGTCAAGAGTAGCTCGGATGATGGAAGGTATGCGATACGAGCGTGGCGGG
AAAGGAAAGTATTGGATTCCCAAACCAGGCGAAGCAACCGCAAGAACACCGTTGCTTGGG
AAAAACGCTGGATCTCCTGGAAGTCAATCTCCCGTACAACCCCGTGATGGCGATTCTGAC
TACATGGGGTGGGGAAATGGTGGGGTAGAACAGCAAGGTCTTGATCCCGAAGAAGAAGGT
CTTTACGAGAGAGCTAGACAACTGGAATTCGGGGATTGGAACTATCATGTGATCACTGCT
CATGAACCGTCTAGGGAAAGATGGCTCACTGGGCAGCCTGATCTTCTGACAACTTCGGCA
AATCGTCATCTCCTTCAACCTACTGATGATAACCGTATTCGAAGAGCCAGTAACATTAGA
GAAACGGTTGAGGATGTCACTAAGCGAACCAAGAGAAAGTCTTCAAGGAATAGTCGTAGC
AGAGATTCTAAAGGCAAGAATAAAGAAAATTCACCGCTGAGTGAAGAAGGAAGAGCGCCA
ATGCTCAAAGGCATGTTGCGACAGCATTCGTCTGCCTCCAGTTCAGCCAAATCCGACAGA
AGTCAATTAGTTGATGTCATCGTCGAAGATACTGCTGCAGAAGAAACAGAAAGAGTTCGG
GCTCGCAAAGAAGGAAGCGCGGGATGGAATGAAACTGAGCCCCGTCGTTTTGTGCGAACA
TATGGAGACGGTACAGGTGAGGACATTCGGGAAGGATTCGAGCCTGATGATGATGTAGAG
GCTGTGGATCCCAAACCAGGTCTTGATGAAGAGTTCGGAATTGATGGGGATAAGAATCAT
GGCAGTGATCAGGACAACTCGGAGGAATCACGCCATTGGAATGAAGCTCGACAAGAGAAC
GTGCTATTAAAGCCTAAATACGGAGTTGATGGAGAGGCGTTTGAGAATGTTTGGGGTAGT
GGGGAACCATCGACTCCTCCACGGGAAAACCCCTGA
>d78cd354-261b-40cf-a24e-60991efe2af9 (mRNA) 729 residues [BFAB_07:585303-587822 - strand] [cds] name=Bfab07g01570.1
ATGAAGAACTCGGCCAGTACCAGGCAGATGGCTGAGCACCATCAGAAGTATTGGAATCGC
CCAGACGGTCGAGTGCTAATATTCATGCAGGTTATAGCGATTGATATCTATCCGTTCCAG
CCAGAAACTGTACCCGAAAACTTGTATTTGCAAGTGGACGATCTCAACAACCGATTCACT
TTTCAAGCCCACAACTTCGACCTTGTCCACAGTCGATTAATGTCGGGCGCTATACATGTG
AACAGATGGGCTGGGTACCTTCGTGATATGCTTCGTGTGCTTCGACCTGGAGGATGGTGC
CAATTGGTAGAGCTGCATCATAACGCTCAATCAGACAATGGAAGTCTAACAGAGGCCCAT
GCTCTTAGACAATGGAGCACTAGGTACAATGAGAGCCTGAACGGCGTAAAAGATCTTCGT
GTCGCACCCCGACTTCCAGAAATGATGAGAGCTGCAGGGTTTGTCGACATTGAACATAGG
ATGATTCCCCTCCACACTTGTGGTGCGATAGATGCCAGAGACTACGATATTGGTACTGCC
AACAGAGAAAATGTCCAGCAATTCTTGGGTTCCATTGCGATTTATCCATTCGCGGAAAGA
CTAGAGATGCCGATCCAAGATGTTCAACTTCTTGTAGCGCAGGCTCGAGTAGAGGCCGAT
GACCCATTATTGAAGGCGTACTTCCCTTTGTATGTATGCATCGGAAGGAAACCTCGCTCG
CGTCGATAG
>a7344a31-c15e-4cfa-9770-3dd4a55b51e9 (mRNA) 1959 residues [BFAB_07:593089-595605 - strand] [cds] name=Bfab07g01580.1
ATGAAGACCACATGGAAGGATATTCAACCGGTTCCAACCTCCCAAGAGTTTCTCGATATT
GTGCTGAGCAGAACACAACGTCGATTACCTACACAAATTCGTTCTGGTTTTGCCATTACC
AGAATCAGAGGTTTCTATACTAGAAAGGTCAAGTTCACAGCTGAGACTTTCTCCGAGAAG
CTCTCTCTCATTTTGGACGGATTCCCACGACTACAAGATATCCATCCATTCCACAAAGAT
CTCCTCAACACCCTCTACGATGCCGACCATTTCCGTATCGCTCTAGGACAATTGTCAACT
GCCAAACATCTCATTGAAATTGTTTCTCGCGATTACGTTCGACTTCTCAAATATGGTCAA
TCTCTGTTTCAATGTAAACAACTTAAGCGTGCTGCATTGGGACGAATGGCCACTATCTGC
AGAAGACTCAAAGACCCTCTTTTGTATCTCGATCAAGTGCGTCAGCATCTCGGTCGTCTT
CCATCCATCGACCCAAATACCAGAACACTTTTGATCTGCGGTTATCCCAACGTTGGAAAG
TCCAGTTTCTTGAAGAGTGTTACTAGAGCCGATGTGGATGTTCAACCATATGCCTTCACT
ACTAAAAGTTTGTTCGTCGGACATTTCGATTATAAATACCTCAGATTTCAAGCAATTGAT
ACCCCCGGTATATTGGATCATCCTTTGGAAGAGATGAACACCATTGAAATGCAATCTATC
ACTGCCATTGCGCATTTGAGATCTGCCATTCTTTACTTCATGGATTTGTCTGAACAGTGC
GGTTACACCGTCCAAGCACAAATGCAACTTTTCCAAAGTATCAAACCTCTCTTCGCTAAC
AAACTCGTTTTCATCGTCATTAACAAGATTGATGTCACACGCCCCGAAGACTTGGATCCT
GAGACTCAGGCTCAACTCCAGGCACTCCTCAAGCCTGGTGACGTTGAGTTATTGCAACTC
TCGTGTACAACCGCCGAGGGGGTTCAAGAAGTTAAGAATGCTGCATGTGAGCGTTTGATC
GCTGATCGTGTTGCTCAGAAGCTCAAGGCTGGTACAAACAGCAGTGGTGCTGTTGGTGGA
AGATTGGGCGATGTCCTCGCGAGAATTCACGTTGCCAGACCTATGGATGGTGTTGTCCGT
GAGGCCTTCATTCCAGAAGCTGCCTTGGCCAAGAAGAAGTACGACAAAAGTGATCCAGAG
CGCATCAGGCTTGCTCGTGATATTGAGGAAGAAAATGGTGGAGCTGGTGTTTACAACGTA
GACTTGAAGGATAAATATATGCTCGAGAACGACGAATGGAAGCACGACAAAATTCCCGAA
ATCTTCGACGGAAAGAACGTTTACGATTTCGTGGACCCAGATATCGAGGCCAAGTTGGCC
GCTTTGGAAGAGGAAGAAGAGAAGCTCGAGGCAGAAGGATATTACGATTCTGACGACGAT
CTCGAGGATGCTGAAGATGCTGAGATCCGCATGAAGGCTAACCTTATTCGCGAGAAGCGT
GAACTCATCAAGAATGAAGCCAAGATGAAGAAATCTCTCAAGAACCGTGCTCTCATTCCC
CGCTCTGCCACTCGCAAGAAGCTTTCCGAGATGGAAGACCATCTCGACTCTCTCGGTCAC
GATACCACATCTATTGTTGCCCGCGCACGCTCTCAATCTAGAGGCCGTAGCCAAGTACGC
AGCCGCGCACAAACCGAAGATGCAATGGATGTCGATGATCCTGATTATGAAGCCAAGATG
CGTGCTAAGAGCAGAGCAAGAAGCCAGGCCAATAGAAGAGATGATGGTGTCGCTGGAAAT
GAAGAATCCAGGACAAAGGCTGAGCGTGCTCAGAAACTCGGCCAGAGAAAGATGAATCGC
ATGGCCAGACAAGGTGAAGCCGATAGGCATGTTGCTGGTGTCAGACCAAAGCATTTGTTC
TCCGGCAAACGCAGTATCGGCAAAACAAACAGTCGTTAA
>1236e899-7503-49de-abfa-2f95a122d9c8 (mRNA) 699 residues [BFAB_07:596203-597077 + strand] [cds] name=Bfab07g01590.1
ATGTCCACCCTCTCTCCATACAAAGCCGAATTTCTCAAAGCCGCAATCGATGGCGGGGTC
CTCAAGTTCGGCAGCTTCGAATTGAAATCGAAACGAATCTCTCCTTACTTTTTCAACGCC
GGCGATTTCTACCGCGCAGATCTCCTCCGTGCCATTTCTACTGCTTATGCGAAGGCTATT
ATCGAGGCACAAGAAGCAAACATTCTGGACTTCGATATTGTGTTTGGACCTGCATACAAG
GGTATTCCACTTGCGACAGCTACCGTGGACAAGTTGGCCGATTTGGACTCAAAATACAAT
ACTATGTGTTATTCTTTCGACAGAAAGGAAGCAAAGGATCACGGAGAGGGAGGAAATATC
GTAGGAGCTCCTTTGAAGGGAAAGAGAGTTTTGATTGTGGATGATGTTGTGACTGCTGGA
ACTGCAAAGAGGGAGGCTATTGATAAGATTCGCAAGGAGGGTGGTATTGTAGCTGGTATT
TTGGTAGCATTGGATCGCATGGAAAAATTGCCTTCGCCAACTGGTGATGATAGCGCACCA
ATGCCAAGTGCGATTGGCGAGATCAGAAAAGAATACGGTATTCCGGTTTTGTCTATCTTG
ACATTGGATGATATCATTGGAGGTCTCAGTGGCATCGCATCAGAGGAAAATGTCAAGAAT
ATGGAAGAATACAGGGCTAAGTACAAGGCCAGCGATTAA
>cdff457a-a4e0-4a12-889d-1136fea042e3 (mRNA) 819 residues [BFAB_07:597064-598514 - strand] [cds] name=Bfab07g01600.1
ATGTCGGAAAACGAACAACGTGAAGGAACACCTCAATCACCCATTTTATCAGAGAGTCCC
AATCCCGTAACCCCACGACAATTCGACGACCAGCAAGAACCTCAAAGAAATTTTGTAATC
ATACCTGAAGACCAGCGAATCAAAAACTTCCATATGTATTCCAATTCTCATCGGGATCTT
CACCCGTATACTCGTCCTCTGACTGTCTCCGATCTGGAGTCTGTCTTTGCCCTCGAGAAT
ATCGCCTTCGAAGATCCAAACGAGAGAGCATCTAGAGAAAAGCTAAGGTATAGACTTACC
AGATGTGGTGAGCTATGCTTGGGTATCTTCTGCACCATGATCCCCGGCTCCGATCCCAAG
ATCGAGACTCTTGCCACAGGACATCCTGTTGAAACCAGTCGAAGGAATGGAGCGATTAGT
GTTCTCATCGGTCATGTCATTGCAGCCAAGACACATGACACGACAGCTTCGGATGCATCC
ATGGGAGTTCCTGAAGGGTGGGAAGCTACTAAACCTCCACGTACAAATGTTGGCCATCAA
GAAGATGGCCGGACTATAGTACTTCACTCGGTTGCAATTCTGCCGGCATTTCAAGGACGA
GGTTTGGGGAGAGTTCTCATGGCTGCGTACATGCAACAAATGAATGGTGCTGGAATTGCT
GATAGATTGGCTCTTATCGCGCATGATCATAAAGTGAATTTCTACAAGATGCTTGGCTTT
TTAGAGAAGGGTAAAAGCGATGCTCAATTTGGTGGCGGCGGCTGGTATGATATGATTTAT
GAACTTAAGACTCCCGAGGCACGAACAGCTTATGGTTAG
>53a1111c-3a2d-491e-ad32-4ad27c88fffe (mRNA) 1302 residues [BFAB_07:599813-601704 + strand] [cds] name=Bfab07g01610.1
ATGCGTATCACTTTGACCATTACTGCTCCTACAGACGATGATGCAGATCTTATATCTCTC
GAAATACCCCAAGATACCACGGTGGGCACTTTGAAGGAATCCGTCCAAGCCGAATCTCGC
ATCCCTAAGAGAGATCAACATCTATACCACAATGGACAACTACTACACGATGACAACAAG
ACCATGGAGCAACTGCAGATTGGTGATGGAGAGATGCTTGCTTTGCACGTTAGGGAATAC
AGAGATCCTCCTGCTGCCACCGCACAACGAACTTCACAACCTTCTCGCGCACCTCAAGGC
AGAGGAGGCCAACAACAGCCAGATCCAGAGACAATCAGATTACAGTTGATAGGCAATGCG
GAAATGAGACGAGAGGTCGCTCGTCAAAATCCGGAACTGGCAGCAGCTGCTGATAGTCCA
GAACGATTTGCAGCAGTACTGAACCAAATGCGAAGCCGGGAAGCAGGTGAGGAGGCTAGA
CGGAGACAGCAAATTGCGGATCTAAATGCCGACCCTTTTGATGTTGATGCGCAAATGAGG
ATTGCGGAGATGATCCGTGAGCAACGAGTGCAGGAGAACTTGCAAAATGCTATTGAGCAC
AATCCCGAAGTATTCGGTCGTGTTCATATGTTATACATCGATGTCGAGGTCAACGGACAT
AAAGTTAAAGCGTTCGTCGATTCCGGTGCCCAAGCTACCATCATGTCTCCCAAATGTGCT
GAAGATTGTGGTATAATGCGACTGGTCGACAAACGTTTCGCAGGTATCGCACGAGGAGTT
GGTACTGCCGCTATTCTTGGTCGAGTTCATTCCGCGCAGATTAAAATCGGAAGCATGTTT
CTTCCTTGCAGCTTCACTGTCATGGAAGGCAAAGATGTCGATTTGCTTTTGGGCTTGGAC
ATGTTAAAGAGACATCAAGCTTGCATAGATCTGTCCAAGGATAAGCTCATCATTCAAGGT
GTCGAGGTTAGCTTTTTGGGAGAGGCGGATATTCCTAAAAATATGGAGGATGAGAGGGCA
GAGGAACCACAGCTCGAGGGACCAGGAGGAACAACCATTGGAGCAAAATCTGGAGCAGTT
TCAGGGCCTTCGACAGGGCAGCAAGCACCTCAGAGCGCATCATCAGCACCAGCTACTTCT
GCTTCATCGGCTCCACCACCACAGCAGCAGCAACCATCGTTTCCGGCAGAAAACATAGAT
CAACTTGTAGCTTTGGGATTCTCGCGCGATGAAGCTGTCAATGCCTTGGCAGCTTGTGGG
GGTGATGTTCAGTATGCAGCTGGTCTCCTGTTCCAAGGATAA
>2faf188e-796c-4212-bca0-34c515493e07 (mRNA) 1497 residues [BFAB_07:601702-603612 - strand] [cds] name=Bfab07g01620.1
ATGTTCGCGGTTCCAGGATGGTCAGTCTCATCGAGTCTGTTAAAAACTCAAAAAGCGGAG
CCTGTCGCTGCAGCTTCAAAGGCTGATGAAGAAGGAGCGCTTGCCGAGACGAAATCGAGC
AAGAAACGCAAACGCGCAAAGAATCCAGATGTTAACGCAGCAAACTTGTCGGAACTTTGG
GATTCGGTCATTGAAGGCAAACCAAAAGCAAAGAAAGTAAAGAATTCCGAAAAGGATGGA
GAAACAAAAGAGAAAAAAGAGAAGGTAGCCAAGGAAGTCACCACAGACGAGGTTGAGAGC
AAACCTGCAAACCTTTCAAATGAATCGACAGAAGTTTCGGAATCTAAAAAAGAAAAGAAA
CAAAAGAAAAATAAGAAGGATAAGAAGGACAAGGACTCAAAACCATCCGATAATGATCAA
TCTACGAAAGACGACACCTCGAGCAAAGCTCCTCCACCTCCTAAGCCCGCTGCGAAATTA
ACACCACTTCAAGCTTCTATGCGTCAAAAGCTCATCTCCGCCCGCTTCCGTCACCTCAAT
CAATCTCTATATACTACTCCGTCCGCCGAATCCCTCGCCACCTTTCAACAAAACCCCGAA
ATGTTCACCGAGTACCACGAAGGCTTCCGCCGTCAAGTAGAAGTCTGGCCCGAAAACCCC
GTCGACGGCTACTCTCTCCAAATTCGCCAGCGCGGTAAACTCAGACGAGATATGCGAGGC
CAGCCCGCCCAAGAAAAGACTGATCTCACTCCATTACCAAGAACAGACGGCACATGTCGC
ATTGCTGATCTGGGGTGCGGTGACGCAGCTCTCTCCACAGGTCTCCAAAAAGATCTCAAA
AAACTCAACCTTAAGATTCACAGTTTCGATCTCCAAAGCCCCAGCCCCCTTGTCACTCGC
GCGGATATCGCGAATCTTCCCCTCGAAGACGGAAGTATCGATATTGCCATCTTCTGCCTG
GCACTCATGGGAACCAATTGGATCGACTTCATCGAAGAAGCCTTCCGCATTCTCCGCTGG
AAAGGTGAACTCTGGATCGCCGAAATCAAATCCCGCTTCGGTCGCGTAGGAGGAAACAAC
AAGAAAGTCGTCGAGCACAGCGTAGGCCACCGCAAAAAGAACCAACCCGTCAACAAAAAA
GCCATCAAAGCCGCCGACGACGAGGAAAACGAGGCGGATCTCATGGTGCACGTTGACGGC
AACGAAGACAACAAGCAGGAAACCGACGTATCGGCTTTCGTTGAGGTTCTGAAGAAGCGA
GGATTTGTTCTGCAAACGGAGAAATCGGTCGATTTGAGTAACAAGATGTTTGTCAAGATG
CATTTTGTCAAGGGTGCGACGCCTATCAAGGGCAAGTGTGTACCAGTGCCTAAGGGTATG
CCAGAAGGAGAGACATGGAAGAAGAAGCCCAAGGCTAAGTTCTTGGATGAGCCCGAAGAT
GTACCTGTTTCCAGCGAGGCGTCAGTTCTAAAACCTTGCGTCTATAAATTGAGATAG
>e24197be-1d9e-4dc5-89ce-3f56de099c3b (mRNA) 3087 residues [BFAB_07:605108-609707 + strand] [cds] name=Bfab07g01630.1
ATGAATCTAGAGAAATCGCAGGATCTTGAAAACGAGGAGGAGGAGGAAGAAGAAAGTCTC
GCAGGTGTAAGAAAGCCTGGTTCCAAGGCTCAGGGTAGGAAACGCACGAAAACGGGATGT
TTAACATGTAGAAAACGACGGATCAAGTGTGGAGAGGAAAAGCCAACATGTCAAAATTGT
TCCAAATCCAAAAGGCACTGTGAGGGCTACATTCAGCGAGTTGTGTTCAAGGATCCCTTA
AGTGCAACCCGGGGCCCATTTGCCAATTCATCCCAGACAACTTTCTCGTCGGGATCTGGT
CGGTCAAATCAGCGTCGTGTTGAGGCCCCCAAAACTTCTCCTATTCCGCAAGTACAATTA
CCAAATCTTGCACCGAAACCAGGTGACTCGGGCACATATACCAGCCCTCCATCTAGACCC
CCCAACGAGATAATTCAAGGGTTAGAACAAAGCATACACGTTTTCTCTGGTCGCGCGACT
CAAGACGCAGTAGTCCAAAGGAACACTTCTCGAGAAACCCCGGAGGCAAAACCAGCCCAA
AGAGATACCGTGGATCGTTCATACTTACCAACTCCCGAACACAGATCACCTCCAGGTTCT
GGGCCTACTCATTATGATTTTAATGCTCTTTTTGAGCAACAATCACCGAGTGGAAACTTC
CCCGTTATGCAATCAAGTCCCTCTCCGTGGATTGTGGACCAGAATAGTACACCCCACGCC
TACCCTCATAAATATGCACAAAATACAAATCCACAATTTTCGCTTCTCTCGCCACCTATG
GTGACTACTCAGAGTAATTCAAGCTGGCAACAACCAGCCTTTTCTCACCCACCTAATTTG
AGTTCAAGCATGTCACATGCCCCACTTACAAACCAAGTAACGCCGATTCTTGAAACAGCA
TATACACCTCCCTTTGACATGGCACAGCAGGCCAGTCATATATCTGATGGGACCTTTTCA
CATCACACGGTCACAAGAAATACAGACGATCATATCATCAACAAGAACAACTATGCTACG
ATTGGACGGGGAAATGAACGGACATTTGACGATGATGAAATGAGCTTGGATAATGATCAG
TGGGCTGATAACTACGAATATGATAATTTCAATGCTCAGAAGAACATGGAATATGGCATT
GGACAAGTGATTGCCCTCCAAGCTAGACAGAATGCACAAGACCAAAGTCTTCGCTCTTTT
ACCTCACTGCTCGATCGATCTAACATGCTATCGGCTTACAATCCTTCACTACGGTCATCT
CCACTCAATAACAGCATGACAGCTAGGATATTTTGTCATTTTATCAATGTGACTGGACCG
AGTATTTCAATGTTCGAGCGGAACCCCGCCAATCCTTCTTTGATATTTCAGGGGACACCT
GTGCCATCTTCTCAACAACACATCTGGACTTATACGTTTCCCATGCTCGCCTTGAAAAAT
GAAGCCCTTCTCCACGCAATGCTCGCTTGCGCCAGCTTACACATTGCAAAACTGCAAAAT
ACCCACATAACCGCATCTTTAAAGCACTACGCAATTTCTTTACGAAGGATTGCAAAGAGT
GTATGCGTGCCTGGGCGCCGAGAACATCCCGCTACTTTGGCTGCAACAATGTTGCTTGCG
TTCTATGAGTGTTGGTGTGCTGATCATCAAAAATGGAGTAACCATCTGCTTGGAACAAGA
ACCCTTGTGAGAGACATTGACTTCACTGGCATGACTCGCCATCTGAAGGACATGCGGGCA
CAGCTACGTCAAGAAGACCGTGCAAAATATCGTCAGGAGCAAATACATATGGGCAAAACA
TTTATCGAAGAAAAACGTAAATTTGCAGCCTCATTAGAAGATGTGGACGAAAATATTGTT
GGAGTATTGATGGGCCGGAGACTCCGCTACGATGACTTTGGACACATTATCGATGAAGTC
TGGGAGGATACCGAAAACAGAATTTATAGCCCAAAGGACATTGAAACTTATGAAATGCAA
CGCGACCTTGTGTGGTGGTACTTTAAACAAGATGTTTATCAGAGCATATTAAGTGGAGGG
AAGCTCTTCACTGAGTATGACAAATGGAGTCTTTGCCCTCCGCGTGCACCACTCGGTCGA
TTAGATGCAGTATACGGCACTTTTGATCATCTCATTCTTTTGATGGGAAGGCTTGCAGAT
TTTGCCGCCAAAGACTTGAAGAGGAAGACATTAGCCATGAAAGCTGCCAACAACCCCATG
GGTAATCAAATGCCAAATTTTGCAGGCATGGTACCAAATGTTAAGGAGCCGACTCTTCCT
ATGGGATTTTCACCAACGCATACTTCATCTCCTCAAAGCTCAGAGGGCGGAGATGTGGAT
CTTGAAACTCAAAGGCTTGAGGCAGAAGAAGAGTGGCAGGATATTCGCAATGCATTCAGC
GTACTTGAAGACCATTTTGGTGAAGACTTTCAACCTTTAGGCGACGAATTTTCGACCCCA
GCTCAAACTCCTTTTGGTCCAGCTTTGCAATACCGAACTTATGGTATTGCTGGCATTTGG
ATGAATTATTATATGGGTCTTATTTCTTGTCACCGATCTCATCCTTCTATGCCACCAGCA
GCAATGTTAGCCGCAGGTATGGCGGCTCGTAAGACGGCGTTCTTTGCAAATGAGCTCGGC
CGTATCGCTGCTGGCATTGCACCAGATCTAAGCATGACGCCTCAAGTCAATCCGGGAGTC
GGCGCAGCACTTATGGAAAGTACAACCTGTCTCTTTATGGCAGGGGTTCAATTTCAAAAT
CCGGACCAGCGGACATGGCTGATATGCCGGCTGAACGATGTGGCTCGTTTGACGGGCTGG
GAAACATCACTCGCTATTGCTACCGGCTGCGAAACATCTTGGGTCAAGGCCGGAGAAATG
GGGAGAGGTCCACCGTACACAAGGACGAGGGACGAGCGAGTAAATCCACAGATGGTCAAT
GGTGCACGCAATGTGGAAAGACTTAAAATACAACATCAGCAAGCTACTGACCAGGGATTC
GTGATTAGTATTCATCAGAGGGTTCATTATGCTATTGGTATTCTGGGTGTCCAAGATGAT
CTGAATAATCTTGACTTGGATCAATGA
>fc6c41ad-967a-49df-8b78-b24350ad76e1 (mRNA) 1410 residues [BFAB_07:609936-611841 + strand] [cds] name=Bfab07g01640.1
ATGTTTTTCGGAAAAAGTACCGGGAAAAAGAAGGCTGGAGAGTCCTCTAGTCAGAATGAG
ATCCCTAATATGGCCCAATGCTTGGCTGCCAATCGAAGCAAACACGACAACGAGCACATA
AACGCAATGGTGTTTCAAGACGACTACTATCGGGATCGCATGCGAAATATGCAGGCCACC
TACAAAGTCAAGCTAGACAGTCTTCCCGGTCTAGGTTATGTTTCACGCATTAAACTGATC
TGGGACCATGATCGTCTCTTGGGGACTTTCGAAATGGACGTTTTCAGAGGTTCTTTGCTT
ATTGATCCTGGTCCTAGTCAAGAGCACTTTAGGGCAGATATCGAATACTCAAAGTTTCAC
GAGGCACGAGCAAAAGATAAGGAATCGAGTGAAGAGTCTGGAGATGATAAGGATGACGCA
GATGACGGAGATGATGAGATTGCTACTACTCGAGAGTATCGTTTCAAATGGCGTGGCATG
AATTCAAAGATACCGCATAAAACCTTCAACTCATCCTTTACTGTCGGAAAGATTCGATTT
GGTAACGGCAAGATCTGGGGATACTTCGAGGCAATGTCTGGTGTTGGGTTTCCAGGTGGT
CGTTGTGAATTTCATGGCAAGATACCACATGGTCCTTGTCTTGTGGATATGACTATTCAA
CAGTTTATTGATAAATGGAATGGATATGCAGAAATTGAGGAGGATGAAGAACCACGATCT
CCGACTCCAAGATCTACAATGGCAATGCCACAAAGTGAACGCGATGGTGCTGATTCAACA
CCTTCACCAAAGGGTGATACATTACAGGTCGAGGAATGGACAGAGGACGATCAAAAGAGT
TTTGTCGAGATGATTACGGGCATTTATGATATCACTAGTAAGGAGATAGAAGAAGATTGG
TCATCAAAGTCAAAGGGTCTGATGGTTCGTCTTCACGTAGACCAGCAACAAGGAAGAGTT
CTAGGGTTTTTTGACATTGGCATAGTTGAAGGCTTCTTCTGTTTGGATGATGAAATCAAA
GACCTCGCACACAATGATTCAATGGGTTTCAAATGGCACGGAAAGGGAACATTCTCCGGG
TCCTCCGAGAAAGGTACTGGTACGATAACCATTCGAGCACGAGGGGGAAGAACAGTAGAA
GGTGTCTTTTGTGGTATGCCTGATAAGAATGATGGCGAGATTGATTTCCGTGGTACAAAG
CGAGTTCTCCCATTGGGAGTTTCGGGTCGTGGTGCGGGCTATTATCGCGCGCAATGGGCG
GATTATACACGTGCTAAGCTGGATGTTCCACAGCAGATTGGTCACAAAGGACGATGGGGA
GTCAGGCAAGAGCTTGCTAAGAGAGTGAGCTGGAATCGTTCTGCCGAATCTGCTAAAGAG
ACTGGAGCACCAAAGAAAGGCTCTGGATGA
>540adb05-b2a6-45c8-82cf-3ca5b0a1e20a (mRNA) 2121 residues [BFAB_07:615080-618142 + strand] [cds] name=Bfab07g01650.1
ATGATGGATCACGCCGGGCATGCTCTCCTGGCTGCGAACCTCATATATGCTAGAGCAAAT
ACGACAAATGGCACAACCACTGCAGATGCGGACACGGAAGTTCGACCACCTATATATAAA
GCAATTGGAATTTCATTGGCGGTGGCTTCGGGAGTATTCATCGGAATATCTTTTGTTTTG
AAGAAGATTGGATTATTGAGAGCCAATGAGAAATACAATGAAGAAGCAGGAGAAGGATAT
GCGTACCTTAAGAATGCCTTGTGGTGGTCTGGTATGACTCTCATGATTCTTGGAGAAATT
TGCAATTTTGTTGCATATGCATTTGTTGATGCAATTTTGGTCACTCCGCTTGGCGCACTC
AGTGTCGTCATTACCACTATCCTGTCCGCAATTTTCCTGAAGGAGCGACTGAGTATGGTC
GGAAAAGTTGGATGTTTTCTCTGTATCGTTGGATCTGTGGTTATTGTCATGAATGCGCCA
GCGGAAGCTTCGGCAGCGACCATTCAAGAAATGCAACATTTTGTGATTGCTCCAGGGTTT
CTAAGTTACGCCGGCGTCATCATCACTGGATGTACCTTTCTTGGATTTTGGGCTGGGCCA
CGATACGGAAAGAAATCCATGCTTGTGTATTTGTCAATCTGCAGTTTGATTGGAGGACTT
AGTGTTGTTGCGACACAAGGTTTGGGAGCTGCAATTGTTACTCAAATTGGTGGGACAAAA
CAGTACAATCAGTGGTTCTTATACGTTTTATTCGTCTTCGTCGTCTGCACGCTTTTAACG
GAGATCATATATTTAAACAAAGCACTTAACATTTACAATGCGGCATTGGTAACTCCTACA
TATTATGTTATGTTTACGAGTTCTACCATTATTACTTCAGCCATTTTATTTAGAGGATTC
AAAGGAACTCCAACCTCTATAATTACGGTCGTCATGGGTTTCCTGGTCATTTGTTCTGGG
GTCGTCCTTCTTCAACTATCGAAATCAGCCAAAGATGTTCCAGATGCTGCTATTTTCGCT
GGTGACCTCGACCAAATGCGCATTATTGCCGAACAAGAGCAACCAGAAACGGAACCAAAG
GCAGATGCCATTAGAGGAACAGCTGCCATTGTGAGAAAATTCTCTTCAGCTAGACACAAG
ATGGAAATGGAGGAAGCCAAGCGACTTCATGAAGAGTCTCACTTGCAGCCACTTGGTGAA
GATGAAATTGTTGAATGGGATGGTCTCCGAAGACGTAGAACTACGATTGGTTCGAACTAC
AGCGCGAGTATGAGATCTCGTGCTAATTCATCTGTTCCTCCTTTACCCGAAAACATGCAA
CATCCAACTCATAGAGCAACTCTTCCTAGAACACCTATTGCTCACCCACCTCTCGGTATG
TCTCATTTCCCGGATCCAGAAGAAGACCGCGACGAAGAAGATCGCCCCGGTACTGGTCTT
AGTTCTTCCATCTTTGGCACTATTCGCAACCGTGTAGCTCGTGGAAAATCTCTGTCTTCG
GGCACAAATCCTGTTGTCAACCTACAAAGTCCTACCCGCCCCGTTCCCTTGACCGACATT
CGTACCTACAGAGGTGGTGATGGCAATATTTACAAAAGCGAGAATAGCGATGTAGCTTAC
TATATTCATGATGATAACACTTCGGGTTTACCACCCGCTTTACGCGATCAGAAGACTGAG
TACACTGGTTCGGGAGGTAGACATATTACTATTGCAGAAGATCTAGTCCGTCCTATCTCC
AGGGCCAGTAATCTAGTTCCACCTACACCCCCACCTCACTCTGCCAAGAGACAATTTTCA
TTCCAGAATGTTTTCAGAAAGGGCGGAGGACCACAACATGCTGACGGACCTCCACAAGAA
GTCCGTTCACCTGATAGGAAACGTATGGGTTCTCGACATGGAAGTGACGAGATTGTTAAG
GGTGCAACTGAAGAAGAAAGATTAGGACTCGTCAAAGGCGATACTAGAACACAAAGTCCA
TCTGGTACATCTAGTGCTCCATCATTCGAAGAAGAAGAAGAAGAATTAGAACCGTGGAGT
TCTGAAATCAAGGGATATAGAAGAAATCGTTCTCCTCCCCGAAGAGATCCTGCGTTGGGA
GAGAAAGGTTCGTTTCTCTAG
>19150545-89a2-474e-a37a-7ce305702f52 (mRNA) 1101 residues [BFAB_07:618586-620216 - strand] [cds] name=Bfab07g01660.1
ATGCTCAGCACCGAACTAAACTCACCACTCAACACTCATGCCGCAGACGTAGAAGAACCT
AACTGGTCTGAGGAAAGACCTCCCCCGTACAACTCAACTAGTTCTTACCTTACCGGACCA
GACAAGTTTGAGAATCTCCGTCTCGATGACCCCAAAGACACCAACGATGAAATTTGCAAC
AAAACAGCACAAGCCTCTACTAGATGGACCCATACATCAGAAGTGATCATCTCACCACCC
AGCCAAGCCTACTTTTCCGACATGAAAAGCCAGACGGGTATCACCCCGCCCCCCTTTTCA
GAATCTCAACGGACCCAGGAACAACCGCCTCCTATTTCCAAGCCGCCCGAAATCCAACAA
ACAAGAATACAAGAATCCGCATCCCAACCCAACATCGAAGCACCACAATCCTCAACCTGG
TGGTCCACTCGCTGGTCCACAGCCTGGGCCCAAGCATTCGGAGAAACAACCACCACACCC
AACCAAATCCACATTCCCTCTCCAAAAGCCCTCAACAAGACTCTCTCCAGAACCCCCAAC
CCCAACCCCAACCCCATTCACACAGGGCGAAACCCACACCAAGGATTCCAGCAGACGCAA
ACCCTCCTCGCAAACCAACTCATGAATCGACGTCGCACCTGCACGAACAGCAGGCCGCAG
GAGCCCAGCCCCGAACTCCGCAAAATATACGAACAAGCCGCACGCACCTTCATCGACCTG
ATCCAAACACTCATTCTGCAATCCGAAGGCCCGAACCAGCGCGTAGACGACTGGACGATT
CTGGGAATGCTCGATGCCCAGTATGCGATTGCGGGAGAGGGAGAGAAGAAACCATATCTG
TATGGCGAGTGGGAGTATCTATGGGCTGTGCACGAAGATGAGATTGCGACGGGCGGACAC
GCGATGCGCGGGGATGATTCGGGGGCGGAGAATTCTGCGCAAGATGGTGGGGTGCGGAGA
ATGGAGTATCGTGTGCCGACGAGGGAGGATTGGAAGTGGTGGTGTGGGGAGTGGAAGAAA
GTGCCGGGGGCGATGAGGGGGTGGAAAGCGAGAGAGGAGATTTGGCCGTGGCAGCGGAGA
TTTTGGGCTGGAGTTTACTAG
>018e1d5a-d4d9-4c2e-999c-ca01fad8c6f7 (mRNA) 771 residues [BFAB_07:620320-621312 - strand] [cds] name=Bfab07g01670.1
ATGCTTTTCTCGAAATACCTCTCGAAAACTCCCAATCAACTCGAACTTCACAAAGCCGCG
CTTCTTTACCACAAACAAAAGCACGCTTTTCGACCTATGCAACAAGTGCAGAAATCTCCA
ATTCATCTACCGGAAGAATCTATACGACAAAAAGTAGGCGTATCATCAGATTCCCCAATA
TCCATCGGCAATGTCTTTCAAGATGGAATATCAAGTCTCCCAGTGATGCATCTGCCCGAA
CATCATCTTGTCCGACTTCGAAAATCGAGAACGCAAAAATCTGATAACGTCTCACACAAG
ACATCAATACACACGAACAATCTCTCTCGAGCTCGTGCTCCCAAGCCCAAAATTCGTATT
TTCTCCAACAGACACTCCAAAGAGCCACCCAAGACGACAACTGAGGAGAAAACAAACACC
TATATCAAAGCAGCAGCTGAAGCAGCAATCAAGCCCAAACCAACTCGTCTAGTTCTCACT
CCCGATTCTAACTGGTCTTTATCTCCACCCGAAAATGCATCGACTTGCAATCTGGCTCGC
GGGGCTAGTACGGAGCAGAATCACGACTACTCCGAGAATACCATCACGGTGGAAAAAGAC
CACACAGACGAGGACGTTTATCATGACCTGCAGTCCAAGGAGATAAATGAGACTGTCGCA
GAAGAAAAACTTGAGTTAGATATTAGACCTTCGGAAGCAAGCAAAGTGGGAATATACCAG
GGGTGGAAGAGACGAATCTTAGAGCGAAGCGGGGCAAAAGAGGTTCACTAG
>e051e057-bff4-4a97-897b-31da6bd7e359 (mRNA) 570 residues [BFAB_07:623158-624239 - strand] [cds] name=Bfab07g01680.1
ATGGTCGCATCTGAGGCTTGGTTAGCGTCCGAGAAATATTTGATGCTATTGAAGGATTCA
GTACCTGACGAAGACCCACTAATTCCATTAGTGATAACATCTTCGCTTTCCATTCAAACT
GCTTGCTCAGAAAATCCTCCACTGCCAGCTCTAGCTAAAGAAGTATTATGGTATAGCCAT
GAGAAGAAGATCAAAGAATTCCACAACATTCCATATTCTCCGTATGTCATAAGGCTTCAA
GAATTCTCCGCGCGTATCAACAACAACGACAATGACAAGACGCTACCCATTCCTCTGTCC
TGTGCGACCTTATTGACGAAGAACGACTTGCAGGATGCAAAGCATAAACTAATTGAGCAG
TTGATTCGAAATCAGATGAAGGACTTTGATAGTACTCATGGAACTTCCTACAAGCTCACA
AAGTTACATCAATTCGAAGGCTTGGAATGGTTCGACGAATCATATGACAATGCTGTCATC
GATTTCTGTGGTGCTCGAAAGGACCAGATTGAATTGGACAAGCTCAGATATGAAGCGTGG
CAAGCTGGAGCTAGGTGGAGGCACGCATAA
>e6a143b2-5a86-4e4f-bc18-7af9416e874b (mRNA) 1725 residues [BFAB_07:626144-628133 + strand] [cds] name=Bfab07g01690.1
ATGGAGAAAACTATAGGACTTCTGGGAGGAGGGCAATTGGGGCAAATGCTCTGCGAAGCT
GCGAACCCTCTTGGTGTCAAGGTTATTATTCTCGATGCACCAAACTCTCCAGCCAAGCAA
GTCAATGCCAAGAATGACCATCTTGATGGCTCTTTCATTGACGCAGAAAAAATCCGCGAA
CTTGCAAAGAAAGTAGATGTTTTGACAGTAGAGATTGAGCATGTGGACACATACGTGTTG
GAAGAGCTCGCAAACTCTGGAGTGGAAGTGCAACCCAGCTGGAAGACATTGCGAGTCATC
CAGGACAAGTATTTACAGAAGGAGCACCTCATTAAAGCCGGAGTACAGACTGCGACATCA
CAAGCGGTGGAGGCTGGAAATCTTGAGGAGTTCGGGCGCACACACGGGTACCCATTCATG
CTTAAGGCAAGGAAAGACGCCTATGATGGACGGGGTAATTGTCCTGTAAAGTCAGAATCC
GATATCAAGAATGCACTTGAGGTACTGAAGGATCGATCATTATATGCCGAGAAATGGGCG
AGCTTCAGAATGGAGCTTGCGGTAATGGTTGTGAAGACAGAAAATGAAGTTTCCAAAGAT
GGGGACTCTACGATTGCATACCCGGTCGTTGAGACAATTCACGAAGATAGCATTTGCAAA
TTGGTTTATGCTCCAGCAAGAGGAATATCCAGTGAGCTCCAAAAGAAAGCACAAAACTTA
GCTCGCAAGGCAGTGGGTAGCCTTTGGGGTAAAGGTGTTTTCGGAGTTGAACTATTTGTT
ATGGAAGATGGTGAAATACTGGTTAATGAGATTGCTCCTCGCCCTCACAACTCGGGACAT
TACACAATTGAAGCATGCCCAACCATGTCGCAATACAAATCTCAACTTCTTTCAATATTA
GGCATCATGCCATCTTTCCCCAACTCAACTATTCCTTCAATGTTTCCCGCAACGATCATG
TTGAACATCCTTGGTGGGGCGTCAAAAGATTCTCACAAGGAGTTAATGCAACAAGCCGCT
GCGATCCCCACGGCCAACCTTCACATGTACGGAAAAGAATCCAAGCCAGCCCGCAAAATT
GGTCACATCACTGTCATTGGTAGCTCTATGGCTCAAACCGAGCAACTCATTTCCCCCTTA
ATCGCGCTGAATGATAACATGCGCGCCGAACGAAAAGGTCTCCCTAAATCCACATCTACC
ACAATCTCATCTCCATCTTCACCTCAAAAGCTCGTCGCTATTACTATGGGTTCAGACTCA
GATCTCCCCGTTCTCAAACCCGGTCTTGCTATCCTCGATTCACTTCAAATTCCATACTTC
GTTACCATAACATCCGCGCATCGCACACCACAACTCATGGCAGATTTTGCACGCGACGCC
GCTTCCAATGGCTTCAAAGTCATCATAGCTGCTGCAGGCGGGGCGGCACATTTACCTGGT
ATGATCGCTGCGCAAACGCCCCTTCCAGTCATTGGTGTACCAGTAAAGGGAAGTACATTA
GATGGAATGGATAGTCTTCTGAGCATTGTACAAATGCCAAGAGGAGTTCCTGTTGCAACT
GTTGCTATCAATAATAGCGTAAACGCAGCGTTGTTAGCAGCTAGAATTATTGGAGCTAGT
GATAGTGCAGTTTTTGCAAAAATGGAGGACTACATGAAGAAAATGGAGGATGAAGTTGTA
GGAAAGAAAGGAAGATTAGAAGAAGTCGGATGGGAGGCATATTAG
>47b2edf7-c582-4306-a7ca-64df21f734c9 (mRNA) 972 residues [BFAB_07:628134-629819 - strand] [cds] name=Bfab07g01700.1
ATGTCAATAAAACCGCCTTCCAAGTCTGTATTTGTTGGAAATATTCCTTATGGTCTCACC
GAGGAACAGATAATAGATATCTTCAGCAGCGCGGGAAATGTTGTCAATTTTCGGCTTGTC
TATGATCGCGAAACAGGTAGACCCAAAGGCTTCGGTTTCGCAGAATATCCCGATTCAGAT
TCTGCAGCTTCTGCGGTAAGGAATTTAAACGACTACGAAATTATGAATCGAAAATTGCGC
GTTGATTTCTCAAATGATGGTGGCGAGGAAGAGAATTCTGCGCCAACCTATCAACCCCCC
CCTCTCAATACAAACGGCCTTCCAGTTCCACCTCCATCCCTACCAATTCCTCAAGCCTCG
AACACCTCCCCATTGCCGCCTCTACCAATAGGCATCGATTTACCCCAAGGTCTCACCTGT
CCTGACGCTATCTCTCGCACTCTCAACACTCTCCCTCCATCCCAACTTCTTGACGTCCTC
TCCCAAATGAAGACTCTTGCCTCAACCGATCCTCAAAAGGCGACCGAACTCCTCCATCAA
GCCCCCCAACTCTCCTACGCCATTTTCCAGGCCCTACTTCTGATGGGTCTCGTTCAACCC
GAAGCCCTCTCATCCGTTATCGAGTCATCAGTCGCAGCACCAGTATCTGCTCCCCCTGTC
TCAAGCATTCCTCCACCAGTTGCGGCTATTCCTCAATATGGAAATTCCGCATACCCATCT
GGATACCCACCCCCTCCTCCACACATGTCAGGCCAAATGGGTTTGCCAATGATGGGTACT
CCACCAGTACAAGGCTATGCGCCACCTCCTCCACAACAAAGACAAGCCCCTCCACCACCA
GCTCAAGTAGCCGAACCAGATGCAGATGCGTTGATGGCGCAAGTTATGGCTATGCCACAG
GAATTGATCGATAGTTTGCCACCAGCTGATAGGGCACAATTGATGGCGCTGAGAGCCCAG
TTTCGTGGATAA
>d5af9da7-43d9-4ccb-8030-6bb5c580652c (mRNA) 924 residues [BFAB_07:629951-631341 + strand] [cds] name=Bfab07g01710.1
ATGTCGAACAATCCGCAAGATGTTTTCAAGAGGCTGCAGAGGATGGCAAGTGAAGCAGGT
AGAAATGGTGGCGGAGGACCGGCACCAAAAGGAATAGCAGGCGGAGTGGCTACACTTATT
GCACTGGGTGGAATCATGGTCGTTGGAAATAATGCGCTTTTCAACGTTGATGGTGGTCAC
CGAGCTATCAAATATACGAGATTAGGTGGTGTTGGCAAGCAAATCTACAGTGAAGGTACA
CATATCAAGATCCCATGGTTCGAGACTCCTATAGATTATGATGTTCGAGCAAAGCCACGC
AATGTCGCCTCCCTCACCGGTACAAAGGATTTACAAATGGTCAACATTACCTGCCGTGTT
CTCTCAAGGCCTCGAGTCGATGCTCTTCCTCAAATCTACCGAACTTTAGGTACCGACTAC
GATGAGAGAGTATTGCCATCCATTGTGAACGAAGTTTTAAAGAGTGTAGTTGCGCAATTC
AACGCCAGTCAGTTGATCACCCAACGTGAGATGGTTGCAAGATTAGTCAGAGAGAACTTG
TCGAAGAGAGCAGCTAGGTTTAACATTATGCTTGATGATGTTTCCTTAACGCATCTCGCA
TTTTCTCCCGAGTTTACAGCAGCAGTAGAGGCCAAGCAAGTTGCACAGCAAGAAGCTCAG
CGTGCTGCATTCGTAGTTGACAAGGCACGTCAAGAGAAGCAAGCTATGATTGTTAAGGCC
CAGGGAGAAGCAAGATCTGCAGAGTTGATTGGTGATGCTATCAAGAAGAGTCGATCATAC
GTTGATTTGAAGAGAATCGAGAATGCTAGAGCAATTGCTCAAATCATTCAAGAAGCTGGT
GGACGCAACAAGATGTATTTGGATTCGGAGGGATTGGGATTAAATGTCACTGAGGCATTT
GAGGATAAAAACAAAAAGGCATAA
>5601332d-6864-475a-be6b-97eab14602f8 (mRNA) 2208 residues [BFAB_07:631967-634688 + strand] [cds] name=Bfab07g01720.1
ATGCTCTTTACCATGAGGAGCTCTTTGTCGTTGGTGGCACTGCTATCCGCAGGGCTAGCT
AATGGTACCTACACCAATTCTACACCGACATTCACCCCTCAAGCTATGTTGAGTTCTCCC
CGACGAGGATCGGCCATCCCAAATGCAGATGGAACGCTTGCACTTTACACTGTGGCTACC
TATTCATTTGAGGAACATCACAATGCTCATGAGCTTCGTGTGATGAACCTTGCGAATGGT
ACATCTTGGCTATTTAGCAATTCCAGTGGCATCAGCAATGTCAATTGGCTAGGCGATGGA
AGTAAGATCATTTGGTTCGTTTCGGAGGAGGATGGATCCACTAGCTTTGTTGTTGGAGAT
GCAACGGCACCAAGTGCGGAACCCATCTCGGCAGGTTCTGTTCCTGGAGCAGTAGACAAC
CTCAAGCTAGTTAGCATTGGCGAGGGAACTCTTGGTGTTGCATTCAGTGGCCAAGCTTTA
CCCAATGGTACTTTGTACAATTCCGAACTTGCTCCCACACCTTATTCAACCGGAAGAGCG
TATACCAAAATTTTCGTGAGGCATTGGGACACTTACATCACACCTCAGAGAAACAGTATT
TGGTATGCTGCTTTATCAACCACTGGAAACAACTATACTCTCAGCGAGCCAATTAATGCT
TTGAATGGATCTGGGCTCGAATCGCCCGTCCCACCATTCGGTGCCACAAACAGCTTTGAC
ATTAGTAGCAAAGGTTTGTCTTTCATTGCAAAGGACATCACTTTGAATCAAGCCACCACA
ACCAAGTCGGATGTTTACTATGTACCATTGACGACATTTACCGAAACCTCTCCAGAATTG
AAGGTGATTTCCACCCCCAACCTCGAAGGTGCTTCGGACGCCGTAGTCTTTTCACCCTCT
GGATCCTCACTTGCTTTCGTTCGTATGGCGCATATCAGCTACGAAAGTGACAAGAACCGC
GTTCTGCAGGTAGCGGATGTCACCTCCGACTTGACTGCCATTGAATTCTTTGCCTCGGAA
GATGGAAAGGGAGCTTGGGATCGTAGCCCAAGTACACTTCTTTACAGTCAAGATGGAGAG
TCTATCTACGCAGTAGCCGAAGATTTCGCTAGAGTTAGACTGTTCACATTTACTTCAGAT
CCCACAAACACAACCCTTCCATCCATTATCTTCAAAGATGGTGGTGTGACAGATCTTCAC
TATCAAGGAGAAGACAAGCTACTTATTAGCAGTTCAAGCTACCTCGATAACTCGGTATTC
TCTTCCGTTGATCCCATCGTTTCAGCTGCCACCAATGCTTCATCTGGTATTACCACTATC
TCAGCCAATCTCAACAGTCTTAAGGCCTATGGACTTTCCCGTGATTTTATCTCCGATGTT
TTCTACCAAGGCGATGGAGACTACCTTGTCCACGCATGGATCATCAAACCAAGTACATTT
GTTGAAGGTCAAAAATATCCCTTAGCATTCTACATTCACGGTGGACCTCAGGGAGCAACT
GAAGATCTTTGGAGTACCCGTTGGAATATGGCCGTATTCGCGGAACAAGGCTATGTTGTT
GTAGCCTTTAACCCCACCGGTAGTACAGGGTTTGGTCAAAATATCACCGACGGAATTCAA
AACCAGTGGGGTGGTAGACCATACAACGACCTCGTCAAAGGTTGGGAATACATCGAAGAG
AATCTCTCATACGTCGATACCGATCGAGCTATCGCTTTGGGTGCCAGTTATGGTGGATAC
ATGGTGAACTGGATTCAAGGCCAACCTCTCGGACGTAAATTCAAGGCTTTGTTCACACAC
GATGGATGTTTCTCCACTCTTGCCCAATATTCATCCGAGGAACTCTGGTTCATGCAACAT
GACTTCAACGGAACACTCTGGGAAAACTTTGACAATTACGCACGCTGGAACCCGGCAAAC
CACACCGATGCCTGGTCGACTCCTCATCTTATTAATCATAATGAGTTAGATTACCGTCTT
CCAATTGCGGAAGGTCTTGCTGCGTTTAACGTTCTCCAGGCAAAGGGTATTGAGAGTAAA
TTTTTGAGTTTCCCGGATGAAAATCATTGGGTTTTGAACCAGGAGAACAGTTTGGTGTGG
CATAAGACGGTGATAGATTGGTTGAATGAACATGTGGGCTTGCCTGTTTATTCCAGCCCA
GATGATACCGATTACAGAGCCGTTTTACAGAACGGTCCTTGGATTTAA
>0a91fa1d-8617-46ff-b776-8905a36431b5 (mRNA) 684 residues [BFAB_07:635257-636366 + strand] [cds] name=Bfab07g01730.1
ATGTCTTTTGCTTCCGAAAAACGAAATGCAAGTCGTGCTAGTTCCTATACTTTTTCTCCA
AAGGCATCTCAAATACCTGAAGCTCCTTCTCCAGTTCTTCCGCCAAACATCCATCCAACA
ACTTTCTGCGCCATTGGTGCTCATGCCTGCGATCTCGACATCCTCTCCCGCCTCCACACT
CAAACCGTGCGAGCCATGGGCCGCGACGTTTCCCGCGAGGAATTCTATCTCCGTATGGAA
GGACGTCCTGCCAGAAGTCTTGTCCCCATTTCTCCCCATTCAAGCATCAATCCATTTTCA
TCTTCCAATACCAAAATCAATCCTGGATATCAAACATCTGGGAAATCTGGAACGGAAGGT
GGTAGTGCTGGGTCTAGAAGTAATAGTTTAAGAAGTGGTGTTAGTACAATGGAGGAAATA
GAGCCAGATCAAAAATTCAGAGCATTTGTAGCACGATGTGTGGGAATTACACCGCGGGCT
TTGTTTATGGGAGTTGGAGCTACAGAGAGGGCCGATAGAAAGGTGGGGAGGGGACCAGGG
TTGACGGCTAAGGAAGAAGAGGAAAAAGGGGTTTACGAGAAAGTTGATTGGGGAGATGGG
ATTTCTGAGTTTGATGCATGGGTCGACATGGTATGCAAAGAGGTCCTGGCTATGAGAAGA
AGGCTCGATGCTTCAAGAGGCTGA
>245e3ec7-f6ba-4ffe-8521-3f84bcb389ad (mRNA) 1815 residues [BFAB_07:637280-639744 + strand] [cds] name=Bfab07g01740.1
ATGATTGTTTTAGATGATCGAAGCACGATGTATGGATTGCCTGCAGCAGGTTCCAGTCCC
CAAATTGATAGGAACTCGTCTACTACACGTGATAGGACAGAAATACCCAAACCAGAAGAC
GAAGAGCTAGTCACGGTTCCTCTCGCAAAGCTACAGCAACTAGTAGAGTTTGGAATCCAG
GTACTGAAAGAAAGTCGAATGAGAACGAACGTTCGTGCAATTGACCTAGAGTACAACGCA
CCTCCGGATCTCCAAGACTTTCCTGTGCTTCAATCTTACCAAGCACGATCGAAAGTTCCG
CGCCCACTGAATCGCCCAGAGTATCTACATCAATTCTTAACTCGGGCTTGCGCAAATCCT
TGGCCAGTTCGTAAGATTGAAGTGAACCGTGACCAGGTGATTCACCTGGATCATCTCAGG
CAACCTTTTAATAGATTCAATTCTGCACATTTTGAGGCCATTTGGGAAAACCACTTTAGG
ACCTTCTTTGGTTATGGGCAAAGGTCTGTGACTGCTACAGAAAAGGTGCGAAGAGGATGG
TTTTGGAAAAGAATACTTAATGAGTGCGAAAAAGAAATGGTACCTTGGTTGCTCGAAATT
GGGACTGATGATCCAGATGTTCGAGCAGCAATTCTTGTAAAGATTATAATTTGCATCATC
CAGTCGTCGATTGAAAGGAGATATTCTGCTACTTCAACAATTGGGGCTATTCTCGAGCGC
TGCTACACGAGCGGAGTACTACGCCAACCCGAAGATATCCCCTCGAATCCTGATAACATC
CAGTTACAAACAGAAATAAGGCAGGACTATTGCTTTCATATAATCCTTGTGGCAATAGCA
CTGAATATATTTAATGACTGTTTGATGGAAAATAAATCGGAACTGGGTCTCAATAGCCGT
CAGATGTTATGGTCCCCTAAGGATTTATTGAGAGAAGCTTGCGGGGGTGCTAATTTAGAA
CAAATTCTTGCTTTTCAAGGACCAGAACTTGTGGTATCAATCCTATCTGTATCAAAATCT
TCCGATGTTCCAGTGCGATTCGAAAGCCTAGCCACAAACTCTGGACGTATTGACGATCTG
AACATTGGGTCCTTGCAAACAATCGGAGGTCTTCGAATAGTCTGGACAGATATTTTTGAG
GAACATCTACTCCTGAATCATCAAAGTAAATGTTTGAAAGTTGCACGACTGCGGCCGTTC
ATCTGGGGGATGCTAAGCCTTTTCCAAAACGATTGTGTCCGTTGGTCTAGTATATACCGT
AAGCCACGAGAGCTTTCAGTCTTAAAAGAGCTAAAAGCCGATATTGAAAAGACATGGGCT
ATTCTATTCTCAATCACGACTCTAGGCGAGAACTCCAAGAACAAATTACGGGTTAGGGAT
AAGCTCAAGCAAGAGTACGAGACCATTATTGACGAGGACCGAAATCCAATGCATATAGAT
ATTCAAACCCTCAAAGAATATCATATGCCATGGATAGAAGACGATTCGGCGACCGGTAGA
GTGCAATCATACTACGAGTCACGATGGGAAAATCTCCTAGGAATCATTAAAGCAAAACAA
GACAAAAGTACTATTGCCTACTCTAACTTCGGCATGTTCGAAGACCGTGTGAGAGATTTG
AGACAGTATATGGATAATCAAGAACAACACGGGTTGCGACAGTTACTGCGAGATTCTAGG
GATGCGCTTAATTATTATACTTTCATGGGAGTCATCATTTTTGGACTGTTGACTGTCTTT
CTTGCTCTGGCATCTTTTTTTGTGAGTGTCGCTCAGACGTATGCTGCGTTTAAAGCATTG
GATATGCCTTCTTAG
>49c64c6d-5276-49fd-ae91-ecbae42f2829 (mRNA) 3609 residues [BFAB_07:642459-647135 - strand] [cds] name=Bfab07g01750.1
ATGGAGGTGTTCGTGAGTAACGTACCAGTTCAGACTGGAGAGCACGATTTTCGGAATTTT
CTCAGACCGAGGGTCAATAGTCTCGCAATTCGTGCATTTCATTGTCATACTGCGCGAGGC
AACAACTTTGCGAAAATCACCTTTCGGACGGCTACAGATGGGGAAAAGTTTCTGCGCAAG
TTCGGGGAACGAAGACCAAACAATAGACAACGAAATCCAAGGGCTAGTCAGCCAAAGCTT
ATTTACCACAGTACGCCGATTTATTGTGAGAAGAGCAATCAGATTGCTAATCCTTACTTG
CTCCGGTGCTTGGAGAAAGAAGAGGTAGAACGTGCTGAGACATCTTATCTTAAGCATGGC
CCACCAATTGCTAACACTTCGTTTGAATGCTCTTCAATCATGTGTGGCAACTGGAATTAT
GTTGGAGAGACTTTGGTCTTCATGCCGGAGTTGATATGGCAAAGTAACATCATCGCTCAT
TTCAAGGAGAGAGCAATGATATTGATTCTGGGCAACGGATTAAGGATGGTAATTCGGTAT
GATACAATAGAACTTCTCACCACCGATGACGGCCATTACCTAGGAATTACTGCGACACTT
CACCAATCTCCTCACTTTTTCAGATCTCCTCCCCAAGAAGATCTCCTATTGCAAATAACT
TACATGTTGAGCAATGCGAACCTCAGAAACGGCAGCAGGCCTCAGCCAAGGTCTCGAGTC
GCTGGTTTTGACGAGAGGCACAAGGAGATTGCGGGTAGCTCTCTTGTGTATCGCTGTACA
TTCAAAAATGTAAACGGATTCTCATCGGATATCGAGCAAAAAATAGAGTCATTGAAGAAT
GCTCGAGGGATTCCTCCAATGATTCATCATTCTGCTTCAATCATTCGTCCTAGAGAATCT
CATATTATCGGACTCAGAAAACTTTATCAAGCTTTAGAGAGTTTCAATAACGAACTACCA
TTCCCATTGACATTTCAAATCCAAAAGCTAGCCCAAAACGGATACCTTTCTCCTCGTCAA
ATAATCGATCTTCTCCCGACCTTCACATCGATGTTTGAAAGAACTACTCTTCCAATTTGC
GTCACGGCGATGAGGAGGCTGTTTTTGCAGATCCCGTACCCTGGACCTAATGTCAAAGCG
GAAGATTTCGACAAAAACGCCATCATTGAACTGCTTTTGGAAGTTGAGAAGGCTTCGACT
CGAGAGGCTCTGTACGCCGAAGGATTTGGAGGCACAGCCTCTCAGAATGCTGCTTTGATT
CATCGGGTTACCATTACTCCTGCCGGATTTTATCTAGATGGCCCTGAGCCTGAGAGTAAT
AATCGCATACTCCGTAAATATGCTGGCAACCATAGTAACTTTGTACGTGTGACCTTCTGC
GATGAAGATGGCGATAGACTTCAATATGCATCAAATGCCTCTAACGACGAGATTTATAAC
GGAGTTTTCAGGAAGGTTCTGCAAGATGGCTTTTCAATCGGAAAACAGAAATATGAGTAC
CTAGGAACATCACATTCTTCTCTCCGTACACAATCTTGTTGGTTTGTGGCACCTTTTACG
CAAAATGGTATATATTATGATGCTCTGCACATCACCCAAGACTTAGGCCGGTTTGGAGAT
ATTCGCTCTCCGGCCAAATGTGCAGCACGAATCGGACAGGCATTCTCTGATACACCAAAC
ACTCTCACTCTTGATGAAACTGTCACAGTAGAAACAGTTCCTGACATCGAACGAAATGGC
AGAGTCTTCAGCGATGGAGTGGGCACCATGTCGGAGAAATTGATGAAGAAGATATGGGAT
AGACTACCGGACAAATACCTTGTGAAGCCGACTTGTTTTCAAATTCGTTATCGAGGCGCC
AAAGGAATGATTTCTCTGGATAGCCGTCTCCCAGGCGTTCAATTACGACTCAGAGAATCT
ATGATTAAATTTGAAGGATCGACTTCGAATGATCTTGAAATATGCGGCGGTGCATACAAG
CCCCTCCCTATGTATCTTAATCGACAATTCATTAAAATCCTGGAAGACTTAGGAGTGGAG
CCCGGATACTTTATGAGGCTCCAAGCAAAGGAAGTTTCACGATTGAGAGAGATTACAGCC
AGTGCATACAATGCATCGACATTTCTTCAAAGTAAAAGAGTCGGAGATGTTGTTCTTCTG
CCACAACTTATTGAACACTGCTCTGCTTTAGATTTGGACTTCAGAAATGATTTGTTTTTA
CGGGATATTCTCGAAATGACAGTCTTGATTGAGCTTCGTACTTTAAAGCACAAGGCTAGA
ATACCCGTTGAGAGAGGTTATCATCTACATGGAATCATGGATGAAACTGGAATTCTGGAG
GAAGGCGAAATTTATTGTTGTTGGATTGAGGATGGAAAGCGCACCACTCTAGTCGGATCG
AACGTTGTTATCACTCGTGCTCCTGCACTTCATCCTGGAGACATTCAATTGGCGAATGCC
GTGAATGTTCCAAGTGATTCTCCGTTGAATAGACTTTACAACTGCGTTTGTTTCAGTCAA
AAAGGTGCTCGGGATCTACCAAGTCAGTTATCGGGTGGGGACTTAGATGGGGATCTCTAC
TATGTTATTTTTGATGAAGACATGAAATTGAAGAGGACTGTAAAGCCCGCGGACTACTCA
AGATCGCTACCTCTAGACATCGGCCGCCCAGTCAAACAAGAAGACATGGCAGACTTTTTC
TTGACTTTCATGAAGACCGACCAACTTGGTGTTATATCCAATAGACATCAAGTGTATGCA
GACCAAGATGTGATGGGAACCGAGTGTTCCAATTGCCTTAGATTGGCGGAGCTTTGCTCT
ACTGCAGTTGATTATTCTAAAACAGGCATCCCGCCTAAACTCAATGACCCAAATGTACCC
AGGCATAGTCTCTGGCGTCCAGATTTTATGGCACCAGGCCCTCATGTCAAAATCTCTCAT
CGGCCTGATGATCGTCTGGGATTCGCGGAAGAGTATATTCCAATTGAAGCAATGGACGAA
GAGGACGAAGTCACGAATATCAAGTACTATGAGAGTAAAAAAGCTTGCGGGCAGCTTTAC
CGTGCGATCGATGAGCGAAAAGTCTTTGAGGATATTCAAAAGCTGAACGTTCAAGCTAAC
GATAGTCCTGATGTCATACAGCACATGTGGGAATTCGTTAAGTCTCGTTCCCAGGGCATT
CAATGGCAACATTTGCGCAAAGATGCCCTCGAGATTCAGGAAATTTACGACAACAACATG
CTAGATATAATGCACCAGTACAGTGAGCATCCAACTCGTCCCATCAGCGAGCGCGAGGTA
TTTGTCGGCAACATTCTCGGAAAAGTTGGATCTGTGAGCAAAAAGCAAAGAGAGTTATGC
ATCAGCATGAAAGAAAAATACGACGAAACCGCGGTGTTTATCATTAATTGTATCATCAAG
GTCGATGATGAGTATTCGGAGGAGGCTCTCGAGAGAAGCATTGCTTGTTTTGCAGTTTCT
TTAGATGATAGAAAGAGAAGAGGTGCTCGAGAAGAACCTCTAAAGAGCTTCAGATATTTA
GCTGCGGGCGTGTGCTTGAGGGAAATGGAGAGAGTACCTGGTCTTCTTCCAAATAGTTGG
CAGGGATAG
>39f1f252-6c9b-45ef-ae63-2b882eb0d2ac (mRNA) 2121 residues [BFAB_07:651587-655322 - strand] [cds] name=Bfab07g01760.1
ATGAAGGGCCGTTCTCATCAACATGCACGTCATGCGAAGCGCGCCGAATTAAATCAGGAA
GATATAATTGCAGCACCCATTGAGGTCAGGCAGCCAGATCCAGAACCAGCTTTACAAACA
ATTGTATCAGTGGTTTATGTAACAGCTGCACCAACCTTTAGCGGATCGATTGCAGGTTAC
TCAACGGTCGGACAAGAAGATGAAACAACATCGGCTGAAGAGACACACTCCTCAACTAAA
GCTACAGTCGCCAAGACAACTGCTACCTCTTCAAGTGAAAGTCACTCAACAACGGCTGCC
TCCACCTTGAAAACTTCGGCTTCCAGTTCTTCCAGTTCTTCCAGTTCTTCCGACCTTCCC
AGTTCCCTCGTCGCGACAACTTCTGTAGGAAGTTCAGTCGCTCTTCTCGCAGCCACTGAT
AATGTACCAACAAGTACGGCAGTCGCCTCTTCGACAACTGCTTCCTCTGCCAATGCTTCC
TCCACGGCTGCAGCAGATTCATCGAGTTCCGGTATGAGTGCTGGTGGTAAAGCAGGATTG
GTCGTTGGCATTTTATTACTGCTTGGAGTTGGACTGGCTCTTCTCTTGTTCTTCTTTAAA
AAGAAGAAGCAAGCGGCCAAGGCGGAACGTCTTGATGATGAGAAATCTGCCATGGTTGCT
TCATCAGCTCGACGCGCAGAAGCTACACGTGCAGAAATTCAACGCCAAGCAAGTCAACGT
TCCAACCGAGGAGGAGCAGCCGCAGCAGCAGCCGCTCATCGTCTATCTCTCCGCCCTGTT
ACACAATTCCAGCCTTTTAACGAGAAAAATGGAGCCAGTCAAGCATCTCCTCAAATGGGT
GGCATGTTAACACCAGTATTAAGTGCGCCTAGCTATCACTCGCAACAACCTCAAGACCAG
AACAGAGACAATCCATTTGGTAACCACGCTGAATCTATTGATACCCCTAATACCAACGGC
CCACCTATTATAGAAGGTTTCAATGATGGAGGTGAAGTAATTGCTGCTTCTGCCGTTGTT
GCTACTGCTGCTGCTGCATCTGGTTCCAATGCCCAAGCTCCAGCCCCTGTTAAACCAGTT
GGTTTAGCTCGCAGTGCTTCTAAAGCCGGCAATGGTCTCAAGATGGATTTCACTACTAAG
ACTAACACAGTTTTGAGCCCACCAAGTCCTTCTGGTTCTGAATTCAGTACTGCATCAGGT
GCCACTCAAGCTCAATCTGTAACTGGCATGGCTATTGCTGCAGCTGGAGGTCCTCCTAAT
ACTACTGTTCACCGAGTTCAACTTGATTTCGTTCCTTCCATGGATGATGAACTCGAATTG
AAAGCCGGTCAATTGATTAGAATTTTGCATGAGTATGATGATGGATGGGCTCTTTGCATT
CGTCTCGATCGTTCTAAACAAGGTGTTGTTCCCCGAACTTGTCTCTCTACTCGTCCTGTC
AAACCACGTCCTCAACAACCTGGTCCTCAAGGACCTCCAGCTGGACCACCAAGACCAATG
GGTCCAAACGGACAAGGCCCTCCTCGTGTTCCAAACAAGGATGGTCCACCTTATCCATCA
TCTCCAATGAGACCAAATGGACCTCCCAATGGACCTCCAAGACCCATGGGGCCAAATGGA
CAAGGACCTCCTCGTGGTCCTGGTATGATGCAAGGTCCCCCAAGATCTATGTCACCAGCT
GGACCACCAAGACCAATGGGTCCAAATGGACAAGGACCTCCTCGTGGCCCTGGTATGATG
CAAGGTCCTCCAAGATCTATGTCCCCAGCTGGTAACCGACCCATGACACCACAAGGTCAA
CGCCCAATGGTTCCTCCAAATCACCCAAATCAACAAAGACCAATGACTCCACAAGGTCAG
GCAACTGAACAAACACCAGCTTCTCCACCGGCTCAGGTGACCGAACAACGACCAATCACT
CCGCCAAATCATGAAGTGACTCAACCAAGTGAAGGACGTGCTCGAAGTGATTCGGATACC
GATCCTATATCTAGACAACCAAGTCCTACATTGAATACTTCCGTGCCAACAATTAGTACT
TCATCTCCTTCATCCCCACCATCTGTTCCAAATATCAGAAGTCCAGTGGAGAGAAAGCCT
GTTCCAGGTCAAGCCATGTAA
>19eb18cd-a656-4792-9639-67c3d05cb89b (mRNA) 1866 residues [BFAB_07:660098-662393 - strand] [cds] name=Bfab07g01770.1
ATGGACTATTATTCGCCCCCACCAGCATACAGTGAGACCCCGAGGTCACCACGGCCTCAC
GACGGTGCGAACCCCTCTCAAGTTTGGCGGAAGCCCGTAGCACCCCAACAGAGTACCGCG
ACACCCTCCGGAAGCGATATCGATAATTTGACAAAGTATGGTCGAAATCCACCAGAGGAC
AACAAAGCGGGAAATCATAGTAGCAGCTATGCTGCTCAAACGGTGACGTCGCAATCGCAG
ACAGCTCCTATTCAAGTTGCCGACTTTGAGACCCTTCAAATCCCCCAGACAAGGACGAAC
ATTGAAAGAACAATATCCGCCCCGGCGGCCCCTTTAAATGTACCAGCCTTCCATGACCTT
CCCAAAGTCACAAACGAAACATCAGAACCATCATCCTACGTCTCAAAAGCATTTCAAGAA
GCACGACATTTCGCGGGAGGACTCATAACCCATCCATCAGAAAGCACAAAACACTTTTCT
ATTCTACGACATTCACACGGTCTAGTATTTTATCAAGGTTGTTCTACAACTCTCGCGGTT
TCAATCTTCTCCGACGCACCCTTACCGCCAGATCGGCAAGTATGGCTACAAGACAAAGGT
TGGTCTGGAAATACTGGGATGCGTCTGAAAGCTTTTGTAGGAAATAATGCTAGTTGGATC
AAAGTTACACCGACAATACCCATTTCAGCAGAGCAACTGAAAGAAAGTGATGAGCGAGCC
TGGCAACGAGATATCAAGAAGTTTTTGAAGAAAACAAAACATCCAAAACATATATTGCGC
GAGACTCTCATAATCCGCATCCCGGTTGAAGCTAGTGATGGGTACTTTCATCTTGTACTT
TGTCAGGGAGAGAAGAAAAAAGTGTTATGTCCAAGTCCGGTTTTCCGTATTCTTTCTGCT
TCGGCGAGTCCTTCTTCAATGAGAGGTGCGAGTTTGAGTACCTTACCATTGGAAATTGGG
GCTATGGCTATGACTGTTTACGCTAACAAGATAATTGGAGGGTTGGTTTCTCCAGTTACA
TCTACTGCAATGAAAGTTGCTCAGCCTTTCATGCCCTCTAAAACCCGGAAGGAAGCAGCC
GTGGCACTTTATGGAAAAAGTGGGACAGAGGAGATGGTTAAATCGACCATCACAAATGGA
AATATTCAATACAAGGGAGTAAGAAGTTTCTCATATAATCAAGCTGGGAGTGGAGACAAT
GAATCGGGACCAAGAGCTCCTTATCCAATTTGTTTCATAGCCCGATCTGAGATTGAAATT
AAAGAGGGAGATTATTTTAGTATGCCTACTATGACTTTGTCCGGTATTGCAGAACATATA
TCTCATCAACTCCGAGGACATTATTTCGCATGGGTTCGACGACGTCCTGATAAAGGAGCA
CCACGTCTCGATACAGATATCTGGTCTCAAACCGTGATATCCTCATTACCAATGCATCCG
TCAAATCTTCACAAAGCGACGATTATCGAAGCCAGTAAAAGAATATTCAAAATCCACTTC
ATATCCGATTGTTTCGAATCCCCAGTCTACGATATGAAGAATTTGGAAATCAAAGTTATG
GGATTCATACGTCCGGATGCGCATCCTGTGTCTTCAAATGAGATAGAGGAGGAGTTGGTC
GCGTCGCTTAATGATATTATTTTTGCTCAGTCAATACTTGATCAACCGGTTTTTGCACCG
GAGATCGAGGGGGAAGGGCAGGGGAGAGGATTGTTGGAGAGGGCTACGACGGGATATGCA
GATGTGAGGTTGAGGGCTCAGAGGGAGATGGATAGAGTGCCTTTGCATAGGATGGGGTTG
AGGATGGAGGTGGATAGGTTGAGAGATGAGGGGGTGGGTTTGAATGGATTTTATGTTGTG
AGGTAG
>7099cfef-e71e-4d68-9a40-dcff81eb4ec9 (mRNA) 1578 residues [BFAB_07:664900-666967 - strand] [cds] name=Bfab07g01800.1
ATGTCGAAGTTCAAAAACTCAACACTGGCAGGACTCATAGGATCAGACTCAGAGGATGAT
CATTTGGTAGAGCGCGCAATGGCGAAACAACAACCAAAAGATAATACAGCTGCGAAGAAA
GTGCGAGGAAGGCCTAAGACTGCTCCATCAAAAGTTACAAAAATAAAATCTCCGGCGCGT
CGCACAAGTGGAAGAATCAATGGAAAGCCAACACCAGAATCATCACCCCAGGCGAAGAGG
GGAAGAAAGAATGTTCATACAGCCAAAAATAATCGACAGAAGAATGCTGGAAAGGAGGCA
GAACAAATTGATGAGACAGAAGACGTTACTATGGAGGACGTGGTTTCGGGTGATGAACTA
GATACTGAGGTAACTGTGCCAGAGGAAGTTGAAGCAAAATCTACGAAGAAAACAACTGCG
ACTCGAGGTAGAGCTGCTAAAACAGTAGTTCCCGAACCAGAAATCGCAGAAGAAGTCGTA
GCACCCGTGGGCAAAAAGGGTAGACCTGGGAGAAAGGGCAAAGCAAAGGTACAAGAGGAG
CCCGTTGCAGAACAAGAATCGCCTGAAAAAGTCATTCAAGAAACTCAAGTACCAGAAATG
GATATGGAATTGGAAGAAGATATCGAAGAACCAGAGCAAGAAGATAGCATACCTGAGGTG
AAAAGGAAAGAATCTCGCTCGCACAACGACTCACGGCGACGACAGATGCCAGTTTCGCGG
CACCGAGCTGGCAGTGCTTCAGATACAGAGAGGAATGAGCCAGCTGTCAGGCGCAGGCTT
GGTGAACTTTCCAAAAAACTTGAGCATGTGGAGGTAAAATATCAAGATCTTCGAGACGTC
GGGGTCAAGGAAGCGGAGAAAACTTTTGATCGATATAAAAAGGCAGCGGAAGAAAAAGCA
AAGGTTTCAAATGAGCTCATCGCTTCTTTAAAAGCCAATCTAGCAACTCAAACTTCTTTA
GCAAAAGAAACTAGAAATCTGAAGAAAACAATTGAATCGCAAGATGCATTAGTTACGAAT
TTACAAGCCCAGATCCATCAATTGGAATTGTCGTTATCAGAAGCGCAAGTGGAAAACAAG
ACATTATCTACTAAGCTTGCTGCAAATCGTAAAATAACAGCATCATACGAAAGTGCAAAT
GTCAAAGTTCCAGGCAGTGCTATAAAAGCCAATGGTGGTATGCGTATTATTGGAAGTCAA
GAAGCAGCTCAAGCTGCACAAGCCGCCCAATTGAAAGAAGATCTATACAGTGATTTAACC
GGACTGATTATACGTGGTGTCAAACGAGAAGCCGAAGAAGATGTCTTTGATTGTATTCAG
ACAGGTCGTAATGGCACCCTTCACTTCAAATTAGGTGTTGAAAGCGAGAAAATGGCAGAT
GGTGATCCAGATTGTCGATATACGCCACTATTGGATCCAAGCAGAGATAAACCCTTGTTG
GATTTGTTACCAGACTATCTTGTTGATGAAATAGAATTTCCAAGACCACAAGCTGCCAGG
TTTTACGCACGAATTACGAGAGCACTTACGGAGAAGCCTGCAAGTATGGGTGGACCTGTT
GAGGAAAGTGATGAATAG
>b44c6731-2e40-40ec-aa4d-958ebe8b875d (mRNA) 1260 residues [BFAB_07:667138-668870 + strand] [cds] name=Bfab07g01810.1
ATGATGGGGGATGGTAACAGCAGGAAGTATGGCCTCTTACAAGATCTATTATTGATCGTT
GTTTCTACTGCCTCTTTTTACTACGTCGCAAAGAGTTTAATACCGGCTCTACCCTTCCAG
AACGATGCTGAGAAAGAACAACACGAAGAAGCAAGGTTAAAAGCCGCGGCGAACCTCCGA
AGATTAAACAGAAGGGGTAGTGATGATGAATCAGATTCAGAGGGAACAGTTTCGGGGAGA
GGAAAGTCTCGCCGTCCTCGTAAAGAGGACTTGATTCTTGATCAATATGAAAATCAGATT
GCCATGGAAGTTGTAGCTCCAGAGGATATTCCTGTCGGTTTTGATGATATTGGTGGTCTG
GACGATATTATCGAAGAGTTAAAGGAATCCGTTATATACCCTCTTACAATGCCTCATTTA
TACTCGCATTCATCCCCTCTTTTATCTGCACCTTCTGGTGTACTATTATATGGTCCTCCA
GGGTGCGGCAAAACCATGTTGGCAAAGGCTTTGGCGCATGAAAGTGGAGCTTGTTTTATC
AATCTACATATCTCGACTCTTACAGAAAAGTGGTATGGTGATTCGAATAAGCTGGTTCGC
GCAGTATTTTCTTTGGCCAGAAAATTGCAACCCAGTATCGTGTTCATCGATGAGATAGAT
GCAGTATTGGGACAAAGACGAAGTGGTGAACATGAAGCCAGTGGTATGGTCAAAGCAGAA
TTCATGACACTCTGGGACGGTCTCACTTCGTCAAATAAGAGTGGATTACCAGCTAGAATT
ATGATTCTTGGTGCTACAAATAGAATTCAAGATATTGACGAGGCAATTCTACGAAGAATG
CCCAAGAAATTTCCTGTTTCATTACCCTCGAACTCGCAAAGAAGACGTATCTTGAATTTG
ATCCTAAAAGATACCAAAACCGATCCAAATAACTTCGATATTGAATACCTCACAAGAGTT
ATGGCTGGCATGTCAGGAAGTGATATCAAGGAGGCATGTAGAGATGCAGCTATGGTTCCA
GTTCGAGAATTCATCAGAGAACAGAGGGAAAGAGGTATGTCCATGAGTGGGGTTGACCAT
TCGAATGTTCGAGGTGTACGGACAGAGGATTTCTTCGGTAGAAAGGGGGGCGGACAGATT
ATCAAGGACAATCATGCACGACAAATAGCTGCAGAAACTTCATCAACAACAAGAGGCACC
ACGACTTCTAGTGATGGCTACGAAGATGTTGAAGAGAGCGTTGCTGAATCAATGGACTAA
>c994c7d4-4a29-440f-8a42-6fbb3fc9c7cc (mRNA) 1380 residues [BFAB_07:669102-671080 + strand] [cds] name=Bfab07g01820.1
ATGTCTTCACCATCAGGCTCCTCACAAGCATCGGGAGCTGGCAAAGCTAATGGTGCCCTC
AACAAAGCATTCCCGCACATTGACCTTGATGGTCACAACCTTCCTCCCTCGCCTGCACCT
TCCAGTCCTCACAATGGCAGAAGATATGCCCTGGCCACCGAATTAGTCTATACCGAGACT
AAGGATCAATATGGAGCTTCAAGTATGCCAATATATCAATCTGCCACATTCAAACAGAAT
TTGGCTGGTGGTGGATCAGAATACGATTATACACGTTCCGGAAATCCTACAAGAACACAT
CTGGAACGACATCTCGCGAAGATTATGAACGCCAATCGCGCCCTCGTCGTCGGTTCTGGC
ATGGGAGCATTAGATGTTATTACAAGAGTTTTACGACCTGGAGATGAAGTTATTACAGGA
GACGATTTGTACGGAGGTACCAACCGATTGTTGACATACTTGGCTGCGAATACTGGCATA
ATTGTACACCATGTTGATACGACTACTCCCGATAAAGTCAAAGCAGTTCTGGGTCCTAAA
ACAGCCATGGTTTTGCTCGAGACACCAACCAATCCTTTGATAAAGATTGTCGATATTGCG
ACAATTGCAAGGACAGCACACGAGTTGAATGAGAAAGCCTTAGTTGTCGTCGACAATACT
ATGCTTTCTCCTATGCTATGCAACCCCTTGGATCTCGGCGCAGATATAGTCTATGAGTCA
GGCACAAAATATCTCTCTGGGCATCACGATATCATGGCTGGTGTTCTAGCTTTCAATGAC
CCCGCCATTGGAGATAAAATGTACTTCACAATTAATTCTACTGGTTGCGGGCTCTCACCA
AACGATTCATTCTTACTTATGAGGGGAATAAAGACTTTGGCAATCCGCATGGAACGACAA
CAGACAAACGCACAAGCAATTGCTGAATTCCTTGAAACACATGGTTTCCGTGTAAGGTAC
CCTGGTTTGAAATCCCATCCCCAATATGATCTTCACTGGTCTATGGCTCGTGGAGCTGGA
GCTGTATTGTCTTTTGAAACAGGCGATGTTGCTCTCTCTGAGAGAATTGTTGAAGCAGCA
AAGTTATGGGGCATTAGTGTCAGTTTTGGCTGTGTCAACAGTCTGATCAGTATGCCATGC
CAAATGAGTCATGCCAGTATTGATGCAAAGACGAGAAAGGAAAGACAGATGCCTGAGGAT
ATCATTAGATTGTGTGTCGGGATCGAGGACGTGAATGATTTAATTGACGATTTGAGCCGT
GCTCTCGTTCAAGCAGGTGCTGTGAAGGTAACTCTTGATGGATTCCATGCTATAGACGCA
GCTCAAGCTATTGCTGAGGTGCCAATAGCCGAATCGGATGCAGCAGCAGCTCCATTGTAG
>f28bf1ac-7982-427e-bc3f-0e0165f6ead2 (mRNA) 1380 residues [BFAB_07:675738-677728 - strand] [cds] name=Bfab07g01870.1
ATGTCTTCTCTCCAGAACACTGCTTCTCCTACCATGGATCGCAGATCTTCATTAAGAACT
CGAGTTCCAAAACTAACCGATATCAAAGGACCATCAAGTTCGGCTCGCAAATCCCTTAGA
CAGCTTCTCAGACAACCCACGACTGCCACCGAAACAGTTGCCCTGTCGCCAATGAATACT
ACGGCCGCAGAATTCGTAACGGCTTTTACACCTAGAACTTACCGGTCAATTTATCCAAAG
CTTGATGTCGTACCAGTATCAAGTGAACCAGCTGAACAAATAGCTATAGTTACCAACAAT
TCCTCCTCTTCTGCCTCGCCAAAAAAGAAGATGAGACTTCGCAAACAGATCCCACCTTCA
TCAACAAACAAGCATGCGGTCTCTGGAATATCTTCTCTAGATTTGGAAACTTCGACTCAA
GCAAATTCTACAAAAGAATCCCCAAAGGCATACGACAAGCAGTCAGTTATCAATTCAGCC
AGAACATCCATTCCTCTTGCTTCTACTCATGGAATTATTTCCGATCTCGACTCCCAAGAC
GAGGATAAGATGCCAGCTAGAAAGTCAACAATGATGCCAAAGCGATCCAGGAGTTCATCC
CAGAACTCATCCCAGAACAACAAGAAGCGTAGTCGCCAGATGTTAGAGGAACCTGAAAAG
ATTTGCATGATCAGTTGTGGTATCGGTGGCCAACTAGATGAATACGCAACCTTTTACTTC
ACAGAAACAGATTTCAAAGCCCTACTCGAGACCGCACCCCATTTTAACAAATTTCGCAAG
CCTTACTCCAACTCTATCTATATCCGCGGATACATGGCCTTATCTTCTAGAGTCATCATT
CAATGGCTCACTAAGGGTACAATTATGCCACTCGAATTACATAAGCCAGGACGAGCCGAT
GGCTTTTCTAATTACCCTTTTGTCCACACGTACATCATGGCAAATGATTTCGATCTCCCT
GAAATGTGCGATGAGCTCATGGATACGGCTATGAGAGAGCTTTGGGGTAGTGGCGATGAA
GCAGTCATCTTACCAGATGCTCGGGATTTGTATACCGTTTATTCGCAAACCCATCCCGGT
AATCCTTTGAGAAAGCTCTACATTGCGGTTTTCGACTGGCTCTTGACCTCCGATGAATGC
AACCGAGACACTGGTAGACCCAGAATCTCCAGCTCGGAGCTTTGGAATCTCCTGTCCCGC
TCTGAAAATGCTGGGATTGACTACATCAACTACTGCAGAAGCCAAATCACCGATCGAGGA
ACATATGAACATCCTCTCGATCCACGAAAATGGAATCTATGCGAGTTGCATCAGCATTTT
CCCTTTAATGATTGTCCTATGTGGATTAAACAACGTAATGCAGTTCTAGAGGACAACTGA
>331bfd8c-6811-4084-a4b3-73e5ff30228a (mRNA) 4269 residues [BFAB_07:678174-684530 - strand] [cds] name=Bfab07g01880.1
ATGGCCGATATAATTGGAAGCCGCGGACGAGATCTACCTGTCCTAAGACCCGGGTCGTTG
ACTTCACCACAAGGGACGACGCAAAGTCTACGTGGCAAAGCAGAGGTTGCACGTAGTTCC
AGCAGTCACGACTCGGTTGATCTTTCGGGAACATTACAAGATCTTGATGAGCAACCTGCA
AATCTTTCGCGTGTTTTTCCTGGTGGTCTTGGTGGAGGAGGTGGTCCTGGATTACCGGGG
ATGGGAGATGGTAAGACTGATTTGTCTGGTATTGGGAGATCGGCCCATGATGCAGAAGCG
CCCATTCCCAAACCTGCAGGGACCGATCAGGGTCTAAATTTCATGATTCCTCCGGCTCCG
GTAAAACCAAAGCCACAACAAGTGGATATTACACAGTTCAAAAATCCAGATGGTAGTTAT
GATATGAATAGACTAGAGGTTGTATTATCGACTCGGGCCCGGAATGTGGCTCTAGAAAAG
AAAGCGGAGCGTCGGTTACAAAGAAGTCGGAGCCCCAAGGCACCCGTACCGGCAACCAAA
TTCCCTGATACTACACAAAAAACAACACCTTTGGGTAGGGCAGAAGAGGATCACCCTTTG
CATGGCGGGCGAGGTACACAACCACTAAGACCGCGAAGGAATCCCAATCTCTCCCCTATT
GCTGAACGAAGTTCGATAGGTAGTAAGGACACGGAAAATATCGCAGGTCAAAAGATGACT
GACCTGCCTGGAGGTGGTGATGATTTGGGGACTGGGAAAGGAGATTCGGACAAGGGAAAA
CAATCCACTGTGGAAGAGGACAAAGTAGACAGCCCAGCTGCTGTGGTATCTATAGCAGAT
GATGAGGGCACTTTATACGGTGCATCTCCCCCAGGAGAACCTGATCAAAAGCCTCTACCC
AGCGATTCGAATACTTCTTCTGGCCAAAGTGAAATGTATCGTAAATGGGCTGCCGAACCT
GCAGAATCACCTACTATCGAAGAAAAGTTCCAGGAATGGGTGAACCGTGGTGAAAGCTCC
GAAGGTAAAACTGCAGCTCAAGAACTCGAGGCGTGGGCACTAAAGGATCTACATGATGCA
CGCGAAAAGCATTTGGCATGGCTTTTTGAACAGAGAAGTAAAGCGAATCTCCAGCTCAAA
ATTGAAACTGATCGGGAAAAAATACTCCGATTGCAAAACATCCTCAATAAATGCACGATT
GCTATCAGAGAAGCTATCAAGTTAGAAGATAAACTACACAATCGGGAATTGTTAAAAAAG
AATGTGGAATTGGAAACAAATATCCCTTTAAAACGCAGACTCGATGCGCTACTTCAAGAA
ATGAATCGCGATATTGAACGCGACGAACAGGTCGAAAAAGAGAGACTCAAGATTCATATG
AATACTGAAAACGTTTGGAAAAGGGTGTTAGATATGACGCCTGCCGAGCGAGAGGCGTTA
GATATACAGACTGTACATCACTTTGCGGCGCCTGTACAACGCCCACCTATGATACTTCGA
GAGTCTTTTGCTGAAAAACTTCTGAGGGATAAATGGGAAAAGGAAGATGCGCCCCAAGGT
TTTGAAGAACTTTTCGGTCGCATTGGTAGTTTTTCCGATTCAGAAGAGAGAGACTTGTAT
TGTGGAGCTTTCCCAGAGATTCGTCTGCCCATATTACTCCAAAGGAACAAGGAATTGGTG
GACCTTTGGAAAGAACAAGCAGATGAGGTGAAAGCTGACCGGCAAGATAATTGGCTAAAA
TCGGAAGCTGAAGCTGAGGAAAAGCTATTGAAGCTACGTCAACTTGAAAAGCCAAGGAAT
GAAGAAGAAGAAGAGGAAAAGAAGCGTCAATTTTTAGACGCTTTAGCTGCAACGATAGCA
AAGAGAAGGGTCGAAGATTCTGAAGTGGACGAGAAGATTGAGGATATTGAGGGAGTATTT
AAAATGCCTCGACCATCTACAAAAACTGGAGAGGGGCCCGGAAGAAAAGGTCTACTCAGT
GTCACCACGGTGCCTATAGTAGCGGGAGACGGTGGAGAAGATGAGGCGTCTGTATCTGTT
AATGTAGCGTTGACTCCGAAAAATTCCGAGGAGACAGTGCCTCAAACATCAAATCCAACC
GAAGAAGAAATACCTGTGCCTGAGCCCCGTCCTCAGTCGCCCTTTAGAGCTAAAAACCCT
CTTTCACCCATTCTAGATCAAAGATCGGGTATCACTTTCGAAACGAATCGTGAGGTTACG
GATTTCCTGGAATATTTGGCAATGGTAAGACATAACGAGCAGGTAGTTAAGACAGGGAAA
GGCGAGCGCATTGATCCAGAGTTAATGCGGGAGAAAGAAAAGAAAGTGATGGATCCTGGC
CCGATTGACTCAGGCGAAGAGGAGATCACTCAAAAGCGTATTCGGATCGCGAAAAGAAGA
TTGGAAATAGCTGCTGATAGGCGAAAGATGCCCGAAGATGAGTTAAGGGCTCTTGAGGAA
AAGGAGGCCAAGCAGAGGAAAATAGCCAAAGCCAAAAAAGATCTTGAAGAGAGGGCCGCA
CGGGAAATAGAGGGAGAGTTGAGATTGGAGGAGGATAAAAGGAATCAAAAATTGAAGGAT
GAGGAAATAGCAAGAGGAATGGCCGAAGCTGAAGAAGAAGAAAAGCGGAAGATCAGAGAG
GAACTTGTCCAAAAAGCCAAAGCCGAGAAGGAGAGAATAGAGAGAGAGAAAAAGGAGATG
GCTGTCAGAGATAAGATCAATAAGGAGAGAGAAGAAAAAGAAAAAGCCGATAAAATTGCT
AGAGACAAGATTGCTAAGGATTTGAAAGACAAGGAGGGGAATAAAAAGCCAGATACTCCG
CAAAATTTCGCTGAAGATATCTTAACCAAGATAAAAGACGATATTCTGAAAAAAGTTCCA
GGGGTCTATGATTCCAAGACAGCAGATGCAGAGAAGATGAACCTGGGTAAAAAGGATATA
GATAAATATATTAAAAAATCCGTAAAGAACTTTGAAGAGGGACATACGCGGAAAGAAAAT
ATGGGCAAGGGCAAGGACAAGCCTGAGGAAAAACCACCTGCCGAAAGTGACGCTGCCAAA
AAAGAACGTGAGAAAAAGGAGAGAGCAGAGAAAGTCGCCCGCGATGCGGAGGAACTCAGA
GTAAAAAAAGAAGAAGAGCTTGCGAAAAAGAAATTGGAGGCGGAAAAAAATAAACCGAAG
AAAGATTGGGCGGCTATAGAAAAAGCCGAGCGATTAGCACGCGAGGAACGAGAACGCGAA
GCTAGAAAACGTTTGAGTTTGGCCAAGGAGAGGGCAGATGAATTGAAAAACAGGCCGGCA
CTGACTGCGGAGCAAAAAGCACTAGCTGAGAAAAAAAGTGCTCAGTTACAGAAGGAGATT
CAAGCTACGGAAGATGAGAAAAAAAGGCAGGATAAAATCGTACAAGATAAAATGGAACCA
TGGAGACGGGAATTCCGTGAGCAGGAGGAAAAGAATAAACGAGATAAGGAAGAACGCGAA
AAAATCGAACGTCGTCTGAGGAAAAAGGAGGAAGATCGGTTGTTACGTGAAAAAGAGGAA
TCCAAGAAGAAGGAGAAGGCTAAAGGATATCGAGAAGCAGCTGCACTTAATGATGGGGGT
CAAGCAGTCGGACTTTTGCAAAATATCGCCCGTAGAATTAGGTTTCCCGATCTCTCCTGG
TTGACTCTCAGAGGTCCTACACACTTGCAACAGAGAGCTGAAGATGTAACTTCCAATCCC
CCACGTGCATCAATTCGTGGTCCTGCTCCGGTCGATTATGAATTAGCCCCTGCAACTATT
ACTTGGATGCACGCTCATGCTTACAAGTCTTCTGCTCTTAGAGAAATTAGTCTGAATCTT
ACGATTTTGACCTCTTCGAGACAACACTTGCCAGATGCTCCACCGCCGCATTATTTGGCC
TGTCATGATATTCCGGTGTTCTGGAATATATCACAGTTGAAGCGACATCTCTCAGCGATC
ATGCGAAAGGCAAAAGTGGGAGAGAAAAGAACTATGAGGTTGAGGATTGAGAGAAGGTGG
TTGAAACATGGGAGTAAGACATTGGCGGAAGAAGGAATCAGGGATTGGGAGAACATGGTG
GTGGTGATAGTTAAGAAGGGGGAGAATGTCAGGGAGGGCGATTGGAAAGATTGTATCAGG
GAAGCGGATGGAATGGCGGGGTGGATAGAGGGTTGGCCGGGAAAGGGAGAGCTGATGACG
CCGGAGGATAGAAAGGCTTGGCTTGCGGAGGCGTTTAAGGCAGTTTCTGGGCCTTTGGAT
AATCTGTGA
>d715ab02-7928-40b4-b2c7-388a8bdbaef8 (mRNA) 1230 residues [BFAB_07:684969-686715 - strand] [cds] name=Bfab07g01890.1
ATGTTCTCGAGAGCATTGAAGACACGATCTGCCGCACCTCTGCGCAGAAATGCCATTTCC
AGAGCTGCTCTCGTAAAGAGAACGGTTACCACAGACGCCGCCTCCGCGCACGCCGATAAA
GATGCTGTTCCTCAGGAAGATGACAAGCCATTCACATTACAATTATCGGACGAGTCTTTC
GAGACCTACGAGCTCGATCCTCCATCTTACACCATGGAGACCACCAAGAAAGAGTTGAAG
CAGATGTATATCGACATGGTTTCTATGCGTCGTATGGAGATGGCAGCCGATAGACTCTAC
AAGGAGAAGAAAATTCGTGGTTTCTGCCATTTGTCAACCGGTCAAGAAGCCGTCGCTGTC
GGTATCGAACATTCTCTTACCAAGGAAGACGACATTATTACTGCCTACAGATGTCACGGT
TTCGCTCTTATGCGCGGTGCTTCCGTAAAATCTATCATCGGTGAATTGTTGGGTCGTCGT
GAGGGTATCGCCTACGGAAAAGGTGGTTCCATGCACATGTTCACCAAGGGTTTCTATGGT
GGAAACGGTATTGTCGGTGCCCAAGTTCCAGTCGGTGCTGGTTTGGCTTTTGCTCACCAA
TACAATGGCAACAAGAATGTCTCTGTTGCTTTGTACGGTGATGGTGCCAGTAACCAAGGT
CAGGTTTTCGAGGCTTTCAACATGGCTAAATTATGGAAATTGCCAGTCCTTTTCGGTTGT
GAGAACAACAAATATGGTATGGGTACCGCAGCCAACAGATCCTCTGCTCTTACCGATTAC
TACAAGCGTGGTCAATACATTCCAGGTCTTAAGGTCAACGGAATGGATGCTCTCGCTGTT
AAGGCTGCTGTCAAGCACGCCAAGGAATACGCCAACGCTGGTAACGGTCCATTAGTCCTC
GAATATGTCACATACCGTTATGGAGGACACTCCATGTCCGATCCAGGAACCACATACCGT
ACTCGTGAGGAAATTCAACGTATGCGTAGCACCCAAGATCCAATCGCTGGTCTGAAACAA
AAGTTGATCGAATGGAATGTTACAACCGAGGATGAGTTGAAGGCCATTGACAAGGAGGCA
AGAGCAAAGGTCGATGCAGAGGTTAAGGAGGCCGAAGAGATGCCTTTCCCAGATGCGACC
CCGCAAATTCTGTACGAGGATATCTACGTAAGGGGAAGCGAGCCTCAATACATGAGAGGA
AGAACGAACGATGAGAACTACTATTATTAG
>93fb624b-759a-4aa4-b72f-08ecb546c43b (mRNA) 2094 residues [BFAB_07:686925-690498 - strand] [cds] name=Bfab07g01900.1
ATGGATAATTTCAGACCTTTGAGCTTAACAGACAGAAGGGCTTCTATTGCACCCATTGAA
AGAGACGGCGAAATGTCTCCCACCCGAGCGTTAACGGTCGACACGAATGGCGAACACATT
CCAATGCCGCAAAGGTTAGAAAAGATTCTAAGTCGACCAAGAGGTCCTCCGACTCCGAAT
ATGACGACTTCTTCCGCCGATATACAATCTCCCACACACTCGAGTCATGACCCCCCTCCT
CCCCCTACACCGGCAGCAAGTCCAGGCCCTGATCACCCTCAACCAGATTGGAGCGAAGCG
GGAGAAAAGGAGGACATATTTTTATCACAAATCAGAATATACTTCGCGCAAAGCTCAGCA
CCTGAAAGAACGAGAATATTAGGAGATCTTTTGAATTTGTGCACAAGCCAACAACTAAGC
TTTGTACATCAATATGTTAGCCCGTTACTGAAGAAAGACCCATTTACCACTTTACCAGAT
GAACTATGCCTTCGTATATTGTCTTGTATCGACGACCCGAAAGTACTTGCGCGCTCATCC
CAGGTTTCAAAACGTTGGAGAGATCTTCTTGCAGACGATGTCACTTGGATGAAATTATGT
GCGAAGCACGATTATGGTCGAAGAATGTCAGAAAATCATCCTGTTGCACCTATAATACCG
TCACTTCGACCGCCTCCACACCCTGTCCATAAAGCATTACAAGCAGGAGAGAATTCGGCC
CTTGCACAATCTTTCCCCAGAATCAGTGCAGGGCTGTCACAAGTCCCTGGAAGTTCCAGA
AGCTTTGATAGTGCGACGGCCTCTGGCGCATTGAGAAGACCAAAGATCAGGTCATATAAA
TCACACTTTAAACAAAGATATTTGGTCGAAACCGCCTGGAGGACTGGAGGACAGAATATC
GCAAGGCATATTACACAAGATCAGGGTGTTGTAACAAGTCTACATCTGACACCAAAGTAC
ATTGTTGTAGCATTGGACAACGCTAAGATCCATGTTTTCAACACGGATGGAAATGCACAA
AAGACCTTGACCGGACATGTAATGGGTGTTTGGGCAATGGTACCATGGGAGGATACCCTC
GTTAGTGGAGGCTGCGATCGTGATGTACGAGTATGGGACATGGCTGCTGGTGAGAGTATA
CATACTCTGCGTGGACATACTTCCACAGTTCGATGCCTGAAGATGTCTGATGCAAACACG
GCAATTTCAGGTTCTCGAGATACCACATTAAGAATCTGGGATATCAAAACTGGGGTTTGC
AAAAATGTCCTTGTGGGCCATCAGGCAAGTGTTAGATGCCTAGAAATTAAAGGAGATATT
GTTGTTTCTGGAAGTTACGATACTACAGCTAGAGTGTGGAGCATTTCAGAGGGAAGATGT
CTACGAACACTCTCGGGACATTTCTCTCAAATCTATGCTATTGCTTTTGATGGAAAGAGA
ATAGCTACTGGAAGTCTTGACACCAGTGTTCGGATATGGGATCCAGAAAATGGATCTTGT
CAAGCTATTCTTCAAGGCCACACCTCGTTAGTTGGGCAATTGCAAATGCGAGGAAACACT
TTGGTCACTGGTGGTTCTGATGGGTCTGTTCGTGTTTGGTCCCTTGAAAAAATGGCCCCA
ATCCATCGATTAGCTGCTCATGACAATAGTGTCACAAGTTTGCAATTTGATGATACACGA
GTGGTTAGTGGAGGTAGTGATGGTCGAGTCAAGGTGTGGGATCTCAAGACCGGGCAACTT
GTTCGTGAACTCACTGCTCCTGCCGAGGCTGTCTGGAGAGTGGCCTTTGAAGAGGAAAAG
TGTGTGGTTATGGCAAGCAGATCGAATCGCACTATCATGGAAGTGTGGTCATTTTCTCCA
CCAGAAGATGTTCTGTATGAGAACTCCTATGGCCAACAAACCCCTCCCATCACTGGGCCC
GCTAGGCCATCAAGTGCCATCGAATATAGGAGCGGTAGTCAAGATCAAGCTATGCACGGG
ATTATGACACACGAAGCATCTTATCAGAGGGACGATATTGAAATGGTCGATGCTGGACCA
TCGACAGCTCCTCCACAAGCTACCCGGCCTACTTTCTTTAACGAAGAGGACTGA
>8e4868f8-4d3b-4dff-a94c-2f89d7adad3e (mRNA) 1218 residues [BFAB_07:691794-693665 - strand] [cds] name=Bfab07g01910.1
ATGTTCGACGGCTTATTTATGCTGCTCGTTTTGAGCGTGATAATGTGTTTGAGTTGCTTT
CTTGCTGGAGCAATTCCACTATCTATGGCCTTATCGCCGTCCCAGCTTCGATTGATATCT
ACGATTGGGATGGGAGTACTTGTCGGGACTTCGTTGGTTGTTATTATACCTGAAGGAATT
GAAGCAGTATATACTGCAGGATCCTCGGCACATGCTCATGGAGCACGGAGTATAGCGATT
CAAGAGAGAACTTCGGAGCTATCATGGGTTGGTGGAGTCAACACAATCGCATACTCGAAC
AAAGCAGTTATCAACCGAAGACGTCCCCATCTTAATTCAAGGACCTCGCAGCCCATGGAA
GTTGAGATTGTCACCAGGGAATCTCTGGCACAGGAAAAGGAAAACGGTGCACCAGAGAAG
TCGGAGGAGAAACCAGCGGGTGAAAGCGATGTGCATCACGATGAGGACGAATCACCTACA
TTTTGGATTGGTTTATCTCTGATTTTAGGATTCATTCTTATGTTCTTAATTGACAAAGTT
CCAAGACATGCTTCCGAGAAATTACAAGCCCCGGTAGCTCCAAGGCAAATTTCCCTTAAC
AATTTATCTCAAGGAATATCAAACATCTCTTCGTCTGATGAAGAATCAGACGGCTTTTTC
CAATCACTCACGCCGAGCCCAAAGCAAAGTCGTAGTCTGGCTACAACAACAGGGCTTGTG
ATACATGCATCGGCAGATGGAATAGCTATGGGCGCATCCGCCTCCACATCCAACACGAAG
TTAGGGTTTATCATTTTCATAGCAATCATGGTCCACAAAGCGCCCGCTGCCTTTGGACTG
ACATCCGTCTTACTGAAGCAAGGACTTTCGAAACGAGCTGCACGTGGTCATCTCATAGTC
TTTAGTCTCGCAGCTCCATTCGGTGCCATCACGACGTTTCTATTAGTGAATATCTTAGGG
GGTGGGAACATCGAGGGAGCCAAAGGACAGTGGTGGACGGGAATGCTGTTGTTGTTTTCC
GGTGGAACTTTTCTATACGTCGCAATGCATGCTATGCAAGAAGATTCGGGGGTACATTCC
CATGAACACACCAATTCCAATGGGTATCTTGACGGCATTTCACAACGTAAACAAGCGAAA
CCGCAAATGAGAGACACGCTCGCGGCGGTTGGGGGAATGTTGATCCCTCTATTAACACAA
TTTGGTCATGACCATTGA
>5af89a7e-46c4-4152-9fb8-320c26240ad6 (mRNA) 1509 residues [BFAB_07:693938-696032 + strand] [cds] name=Bfab07g01920.1
ATGGCTGGAATCGATTCCGATTGGTCGTCCGATTCAAATGAGGCCATTTACATCTCCCTT
GTCACTCCAGGCGCAGAAGGCATAACCTCACTTCATACTTTCAATCCAAAATTCACATAT
CCCATATTCGGGGACGAGGAATCAATATTTGGATATCAGGGATTGAGAATCAACTTAAAA
TACAATGCCTGTGATATGCGACCTGGCCTACAAATCACCTACAACAAGAAGTTTAAAGCA
GTCGGTGACATAGAACCAACAGACCTGAAGGCAACGCTGGAACCATTCTTACCAAAGACT
GCTTTTGAGAAATCAAGTGTTTTTGAATCGCATATTTCCGCCACCCCAGCAGATTGGCAT
CCACCAGGAGAGCTCTTTCGCGCAATTGAGGTCGGTGGAGAAATATTTGAAATATGGAAA
GGCAATCTCTCCGATCCGGTCATTCAACAAACCATCAAGCGAGTGCAAACTCTAGTCCCA
TTGTTTATTGAAGGAGGAACATTGCTTGATCTGGATGAGTCGGAAGATGACCTTGGACGT
TGGACAGTATTCTTCTTGTACCACAAGAAGCCAGCCGCAGCCTCATTTTTCGAGAAATCT
TCATCTTACGTGTTCATGGGCTTTTGTACTGTTTATCGCTATTTTGTTTATACGCCTGCT
ACCCCTCCACAATCCCCCAATGGCGACAAAATAGCTCCCGAGTTTACAATCCCTGTTGAT
GGTGTATCGTTTAACACGCTTCCATGTCGTTCAAGGATATCGCAATTTCTCATTTTACCC
CCTTTCCAAAGCGGGGGCAAAGGATCACTATTCTACAACGCCGTATTCGACTACTTATCC
AGCGACCCATATACAAGAGAAATCACAGTGGAGGACCCGAATGAAGCATTTGACGATTTA
AGAGATATCAACGATCTGGGTCGTTTACTCAAAGACGAGCGTTTCCTTAAATTAAAATTG
GACTCTAAGGTGAAAATTAACCCTAAAGGTCCAGCACCAGCCAAACTCTTTGATACCGAT
GCATACGAGAAGCTACGAATTCAATCTAAAATCGCTCCTCGACAATTCGCTCGCCTTCAT
GAAATGTATCTCCTGTCTATAATCCCCCCATCCGCCAAAGCAGCCCCTTTGCGCGACACT
GGAAAACCTCAAAAGTCTCTCCCGCCCCCCAGAAAAGAAGATGAACATATGTATTATCTC
TGGCAACTCCTTGTGAAGCAACGTCTCTATCGTCATAACAAAGATGCATTGGCGCAATTT
GATCGTGGAGAAAGAATCGATAAATTGAACGAGGCTTTAATGGGTGTAGAGGCTGATTAT
GGAAGACTAATTGAGATAGTGGAGGAGAGAATTGACAGGGAATATTCGACTGTTGTTGGA
AAGGGTAAGGGGAAGAGTGTGGCTAATGGAAATGGAAAGAGGGCTGTTAGTGAAGAGGAC
GATGAGGATGAGGATGATGAAGATGAAAATGAGGAGCCTTTGGCTAAGAGGTTGAAGTTT
GCTTCTTGA
>56676c61-f076-4303-a7cd-ca9b25121747 (mRNA) 906 residues [BFAB_07:696984-698516 + strand] [cds] name=Bfab07g01930.1
ATGGATCCAGCCAGACCAGCTCCACTGCGCAACAGTAGACTTCTCAATTCCATTGAAGAG
CCGACTTTTCGCGCAAATCTACCAGATCCGATACCAACCAAGCCGCTGAAAGGGAAGGTT
AAGTCAGCGCCAACAGAGATGGACCCCTTCGAAGTGCGCATTCGCTTTACGCAATATTTG
CAACATTTGAATGCAAGTGTTACGAGTGCGAATAAGACGGCACAATATGCGTTGAAATAT
AGAGATATGGATGAGGATTTGCATAGTTGCATTCTAGAACAACTGGAGAAAAATTCTATG
AACAACAGAGCAAACATCATGTTTTTTATCGAAATTTTATGTGATATGGCATCGAGAGAT
GGACACGACGATTATGTACGCATGATGCAAAGAGACATTCTACGGGTAGTTGATGCAGTT
GCGCCAGAAGATGGATCCGGAGCAGCAAATGTCAAAGTAGTGCGCAAAGTTCTCCAAGGT
CTTCAACAAAAATCCTTCCTCTTACCACAAACTGTCACGGAAATCGAAGAATGTCTCAAG
GAACGCGACACCCAACCCGATGCACTCATGTCTTCTCCGCCCGCAAACGAAGCCAATGGA
AATGGAACTTCACAACATGCTACTCCCAAACAAGCTAAACCAAACGGGGTCGCGAGATTG
GATAAGAGGCAGATTGAACAGAGAATTGAAGAGGATCGCGAGAGACACAAGAGATTGAGA
GAACATATCTGGGCTGTACCCGCCTCGGGTCCTAATTCGGAATTCGATAAACTGTGGGAT
GAAACGAGCGATTTGGGAGATGATGATATGGATTTATATGAAGAAGAAGCTATGGAGAGA
AAAGAGGCCGGAAGGGAATGGTTTAATGAGCAAGTTCATAAAAGTAGACTTGAGGGTCAA
TCTTGA
>299a5841-1126-4a8f-bab1-487f64356146 (mRNA) 372 residues [BFAB_07:702810-703244 - strand] [cds] name=Bfab07g01940.1
ATGTCTGAATCTAGCAGACACAGTTTAGCGAATAATGTCGACGAACTAGTCAGGGATTTC
AAGCTTCTCCGCCAATTTAAGCGGGATAGTTCACCAAAATATAGACAGGCGGAAAAAGAT
CTTGATGACATGATGAAGACACTCGATGCTCAGAGTAAGCAAGATCGGGAAACTGTTGAA
CGGTTGTGGCTTAGAATTCCCAGATTGAATGCGGCCAAGATCCAAGCACACGCGAATGAC
GATCTTGGATTATGCAATGAAATTGATATAGAGCTTGGAGCTATTCAAATTCAAGTTGGA
GAACTTGCTACCGGGATAAACAGTATGGAGAGGGATATAACCGAAATATCCAATTTATTG
ACTGAACAATGA
>0b7066d9-bb6f-49a0-b48d-bf30ff4658d8 (mRNA) 381 residues [BFAB_07:704065-704498 - strand] [cds] name=Bfab07g01950.1
ATGTCCACATATCATAGCCCAAGACACTCTCTTTTTAGAGAGGTCGATTTTATGAGAGGA
GAAATGTGCCGTTTCAGACAGCTGCCACTCGATCATGTTGATCGCCAAGCAACTTATCCG
ACCCTGCGGAACAATCTGCAAAGTCTTTTGATCAGTCTCCGCTATGAAAATTTTATATTA
GAGAATAGAATCTCCGAATTGCAAGATGAAATCAGTAGATTTTCAAATGGCGAAGGTCGG
ATGCAAGTCGTGGGTAGCAACGTGGCTGAAGGGAATATCGCGGAAATTATTGTTTTGGAG
GGTCAGCAGGGAACTATAGATTCAGACATAGATACTGTAGAAGACTGGGTGAGCGAAATC
CAACTCATGGAATGGACATAG
>61e7dcb9-2779-429f-9ea5-42a19973e439 (mRNA) 3018 residues [BFAB_07:707347-711842 - strand] [cds] name=Bfab07g01960.1
ATGGATCAATTGGTATTGAAGCCACGGGCGCCCGTGGAGGACGACGTGGAGAATTGGGAT
GATGATGACCTTGACATTGGGGGCGACGATTTTACATTTCGAAGTGCTTCAGCAGCAACA
ACTGCAACCATTGCGTCGACACGCAGAGAGTCGGTTTCTTCACGTTTATCGATAAGATCG
GACTACAACGAGGAACGACAAGTACATCTACCAGAAGACGACGAACGAGCCATGAACGAT
GCGATCGCTACAGCTAAAAGAGCCGGCATACCGTTACCGGAAAACGTACCTTCCTCGGCC
TTATTAGGAGGAAGTATAAAAAGACTAGGGGGAAGAAAATTAAGAAAGGTAATTTCAGAT
GATTGGGACGATGGAGATATCGAAGTACCAGTCGGAGAGGCCCTGAAGATCAAACAACAA
GATGGGTCTCAATTCCCGGAAACACTACGTCAAGTCAGCGGTTCTGGATCTCTAAGTCCG
CAAAAGACATTGATGGCTGCCCCAATATTCCACGTTAGCCCACGACCCGAATTGAAAACG
AAGGCAGCATCCTCGAACATGCTTGATCGCTACAGAGACGAGGAGGACGATGAATTCTTT
GGAGATGGCGAAGCAACCATCAAAGTCGCAAAGAAACGGAACCCTCAGTCTATGGCACCC
TCCATCAAATCACCGACGCCAGAGAAATGTAAGGAAACCGAAGAAGATTTCGAACATGAT
CTACAACTCCCTTCAGATGGAGATTTGAAGCTCACTACTCGTAAAGATATCCCGAAGACC
CCCCAGAGTATCCAGGACGATTTTGACGATTGGGGTGAAGGCAGTTTAGGTACTCGATTT
GGTGGAACAAAAAGAGATGGTCGATCCAATAGGAACTCAGATTCCTTTGCTATGAGCCCC
AGTATTGCCAGTTCCATGACTGCTGAGAGTGAAGATGAAGGTCTTGAAGGTTTAGTGTTA
CCCAGTGGCCCTCTCAATTTCGAAGACATTCTTAAGAGGCGTCAACTAAATGATTGGCCC
GAACGTCCAGTAGAGGTAAAGCAACCGAGAAAAAGTTTGGGTGGAAAGGACGACTTCTTG
ACTGGGCTTGAGATTGGCGATGGGGATGTCTTCGATTCAAAGAAGCTCACATTGAATCGT
AACGTAAAGGTCAACCCTGCTAAACAACAAAGCCCAACTCGACCCAAGCCATCAGTTTCA
TTAACTTTCACAAACAAACCTGCGCTCCCTTCCACCTCACGACTTCCTAGGCCACATGGA
CATGAACGTATTCCATCATCTCTCGAACCTGTTTCGGAGAGTGGTGGACCAATTCCAAGT
CGAAATCGTAGGTCGCAGTCTAGGTTGGGACATTCAACCCATTCTTCAATCAATAATATT
GGATTGTCTAACGCACCATCTTCTAATCAACCAATACCTCCATCAACTCCTCGGCGTCGT
GAATTAGGCACAAAATTATCCACATCAACTCTGCGCAATGAGCCTACAACGACCAGTTCC
CAGCTATTAAAGCTCAAACGGTCAATGCCAACCATGAAGACTTATCAGCCTTCGCCAGCT
AAGCCAATGCCTACACGATATGAGAGACCTCCGTCTCGAACGGAGATCAATAATAGGCCA
CTCTCAATGTCTCGGTCCAAGGAACCTGTTGAAAAAGATCGATCCGGAGCTGAGTCCAGC
ATGTCCTTTGTTAGAAAAAATCACGTTCCATTCTTACCTGCTGGTGGTCCTTCCAGTTCT
CAATCACATCATGTCACTGCAAAACCAACTCGGCATCTTCGCCGTAACGACTCTGAGTCC
TCAATCAACAGCGCCGATTTTCGACCACCATCGAGAACGCTTTCAAGGCAAACATTTCGA
TCTCCCAGTCCGCGCAGATCTCTTCGGGGCGCCGATATGCTTGCTCGTGAAGCTACTTTG
AAGCGACAAATCACAAAGCCTGTTCGACGAAGACATTTTGGTGATGGCTGTGAACTTGAT
GCTTTTGATGATCTACCTACCTCACGAGATGCAGAGCAAAAGTTCATCAAAGAGCCAATT
GGCCGTGGTCCGCCTAAGCAGCTTTCACTTCGCAATAGAGCTCATCAACACATTATGCCG
ATCCGAAGTTCAGCTCCTGTACCATTGACACCATTGACACCATTGACACCAGCAAAGAGC
AGGAGTGAATTACCGCGCTTTGCGCGTGATACTGCCGCCAGCCGCATGGCTCGGGAAGCA
ACATCATCCAACCGCACCGTCTCTGGGTCCGGAGCTCCTCTTGCTGCCCTTACAAATCAA
TGGAGGGCGAAGGTTTCAGCAACGACTGGACTTAGTCCTGTTCATGCACAAGGTTCAGTT
CGGTCGAAAAAGAACAAGGTCCCTCAAAAGCCACAACTTATTAAGCCTATGGGAAATATA
AATAATCCTAGATCTGTAAAAGGAATGCAATACGATCCTGTTAATTACCGATGGGAAGGA
AACGAAATTGAAGTATCGGCCTTTGATATGCCAGCTTCTGCAACCCCGACAATTTCAATA
CCTGTACAAACACCAAGAGCGACAGCACCGCAAATATATCGAGAAAAAGAGTGCTCGACA
CCTCGTCCTGCGCTCATCACCAATATAAATTCTGCTCAGAATGTTCAAGTCGTTGGTGGA
ATGGTCTTTGACCCGCAACGAATGTGTTGGCTTAAAATGCCGGGGGAAAACAAAAGAGCA
AAAAGCGAATCAGGTGATACCATGGATGGTTTTGATGCTCTCGAAGATGAGGATGATGTT
TTTAAGGATGTTCCTGATCTTGAGGAAGGGCCCTCTAAAGAGTCTGATGAAGTCTCTGGT
TTGAAGGGTGAAGGAGCCGCTGGTCTTAGCGATTGGCTTGTTGGTGAAGAGTTTGACGTT
GGTCCAGAATTTGTTAGACGACAGAGAGAAGAGGAAGACCGCTGGAGGAGAAAATGTGAG
AAATGGATTGGCGCCGCACGCAACACTGAAGGAAACTCCTGGAGATGGAGTATTCGAGAC
GTAGTAAATGAATTATGA
>d4f8a271-c686-4dd3-8c24-5778ccf8e18d (mRNA) 1119 residues [BFAB_07:712415-714711 + strand] [cds] name=Bfab07g01970.1
ATGGCGGCGAAGCAACTTCCAGCGGTTCTTCGCATTACATCGAGCGCTACGAATCAGGAT
GAGGGTTTTCTCATGCACGTCGAATCTGCTGGGTCGCGACCTCTAGATCTGAAGTTGGTT
GGAACGGATGGCGAACTCGTATTTGCGGTCTCAGTGAAGCACAGCAAATTATCTTCACTC
AAGTCAAAGAATTCTCCATGTAGCGACGAAGAATGGATTCTGATTTTGTCCTCCATGCTG
CTTCATGAGCCGCCGACGGAAGGAAATGAGAATGTGACCAGAGGAGTTGAGATTCATGCT
AAAGTGGAGAAGAAAGCCGTGACCCTCGTGATCCAAAAAGTTATTGAAGGGATCAAACAA
CGTCTCGGCGCAATCAAACTGGATGAAAGTGAAGAAGAAGAAATTGGCCTTTTTGAATGG
TGCGCTCTAGCAGCAAGAGCGGCAGAATCGGCAAAGGATGAGTTGGAAACATTGCGCACT
AAGTACAGGGAACAGCAGAAAATGTTAGATGGATTCAATGAAACTTTCAGGGAAGTAAAC
AAAACAAAATCCGACTATGAGATTCAGCTGTTGGAGAAGTTTAGCCTCTTGCAGAATGAG
AAGAAGCTCAAAATAAGGGACCAACAAACCTTATTAGCAAGCGCCAAAGTTGATCCAGAA
AAATTCGATACAGTGCGAGCTACAAGATCTGGGAAGCTCAGAACCGCCGGCGCATCGAGA
ACTGGGAAGCGCAAAGCTGGAAAGGAAGTGCAGGCTGAAAGCTCAGATTCAGATGATGCG
TTTGAAAGAATGGATATTGACAAAAAGCAACAGGAGGATGATACTGCCGACGAATCAGAC
CAGCAAGAGATACAAACTCCTGATCGCTCGGATGAAGAGACTGAAGATGAGGCAGACGAT
TCACAGCCAAAACCTCAACGTCGCAAGGGAAAAAATATTGTTCAAGATGATTCGGATGAG
GGAATGCGAACGGCACCTAAACCAACAGAGACAACAAAAATCGCCGAGCTACCAGCTAAA
AGGGAACTACCATTTGCCAAAAAGGCAGCTCCGGTACCTGCGCCCAAACCTGCAGATGAT
GGATCTGAGACCGAATCGGGCTCGGACGATGAATTATAA
>5096e574-a207-43bf-84b2-84acd8b20678 (mRNA) 702 residues [BFAB_07:717467-718565 - strand] [cds] name=Bfab07g01980.1
ATGTTGGAAAAGTACCAATTGCGCGAGGCTAGGCGGGATAAGGAAAGATCTTTGGAGGAT
CAGCAGATATATTCTCGTAAATTTGATCTCCATCAATACTTTTCCCCGGCTAGTAGAAAT
ACCAAGAGATTTATTTATTATGATAAATCTACTGGTATCTCTCATGTTCATGATGCCAAT
GAGATAGCTGGCGATCCAAAATCTTTGGTCGTCGCTGTTGATGGAACTTGTGCTCAAGAA
GGGAGTGGCTCGGAAAGCAAATCATCTTATGGAATATTCTTCGGGGAGGATTCGAGTTTC
AATATGTATGACACGATAGAGACATCTGATAGGAAACAGCACACCGACGATTATGCGCAT
CTTATGGGCATAGATCGTGCCCTGGATCTCATAAAGAACAGTCCAGTTCTTGAAAAGTGG
CGGTCCACTGGCGAGCGTGAAGGAGCATTTACAACTATTATCATGACGGACTCAGCATAT
GTTTACGACAACTTCACTACGTCGATTTGGCAATGGCGCAAAAATGGCTTTGAGAGTTCT
GAAGGTAAACAGGTGGTTTACGGTGAGTTGATAGACAAGATTGATAAGGCTATTTTGGAT
CTCGCGGAGGACAAAATTTTGGTTCGGTTTTGGAGCGTTCCGAGAGAGGATAATAAAGAA
GCGGAAAAATTGGCAAATCGTGCTTTGGAAGAAGAAATTTAG
>6222e74e-e16a-43a6-a851-f910632a36bd (mRNA) 1053 residues [BFAB_07:718986-720533 - strand] [cds] name=Bfab07g01990.1
ATGAGTACATTGATCAAATCTGCGTTCAAATTTTCCACTCGTCCTCTCACGAAACGATCT
CACAATCTCCCTTTTTCTACAACTACCGCACGCTACATCATGAATTCTGAAACCTCGGCC
TATCAAAGTTCTTTTGGAGCTGAAGGCAATTCAGGAAATGCTCCAAAGCAAATAGGCCAA
TGGCAAAGTCTCAAGTTACATGATGGAACTGAAGTTCCAATGCTTGGGTATGGTCTTGGA
ACTGCTCGTTTCAAATCCAATCCAGATGCGGGGGTCGATAATAAGATTGTGAAAACGGCT
GTCATGGCCATCAATGCTGGCTATTATCATCTAGATGGAGCTGAAGTGTATGGAAATGAA
ACGGAGATGGGTATGGCAATCAAAGAATCCCGTGTTCCTCGGGAGAAATTCTTCATAACT
ACCAAATTTTTTGGTACCAAAATACTTGACACTCAAGCTGCATTTGAGGAATCTTTGAAG
AAGCTACAACTCGACTATGTCGATCTCTACTTGATCCACTCTCCATATTTTGCCCAGACC
CCCCAAGATTTACAGAAGAAATGGGCAGATATGGAAGCAATTTATGCATCCGGAAGAGCG
AAATCTATTGGAGTGTCTAACTTCCTACAAAAGGATATAGAAACTATTTTGGAGACGGCA
AAGATTATCCCTTCAATCAACCAGATTGAATATCACCCTTATCTCCAACATGGATCTCTC
GTTCCTTTCCTTCGCGAAAGGAACATAGCAGTCGCAGCCTACGCTCCCTTGACCGCTGCC
GTCAAGGCTTCTCCTGGACCTTTGGACGATACCTATTCTATTCTAGCTAAGAAGTATGGA
GTCACACCCGGTGAGATTGCATTGAGATGGGTTATTGATCAGGGAATCGTAGCATTGACT
ACTAGTGGAAATGAGGACCGATTGAAGGGATATCAAAAGATTAAACAATTCAAACTGACA
CCGAAGGAGGTCGAGGATATCTCTCGGATCGGTAGCGAGAAACATTACAGAGGGTTTTGG
AAGGATAAGTTTGCGCCGGATGATAGGTCATAG
>54f78a0f-14a1-4a92-a888-1d5aca00f871 (mRNA) 1929 residues [BFAB_07:720739-722919 + strand] [cds] name=Bfab07g02000.1
ATGCTCTCGCATTTCTTCTCACGACTTCTGGTACCCCGCATGCGCATAGCTCAGATGGCA
TCTCATATCTCCCAAAGCAGTGCTTCAAAGGCGTCTTCCTTTGCCGCAAAATCACTCGCA
GACCTTCCCAAATCATGGACGTTCACTTCATCACTGCCTCCCGATCCTCTCTTTCCAACA
CCCGCCGCATCACACCAAACTGCCCGCGATGAAATTGGACCTCGGCAGGTAAAGGGCGCA
TTATTTACGTGGGTTCGACCTGAACATTCGATAAATCCAGAACTTCTGGCCGTAAGCCCT
AATGCGATGAAAGACTTGGGAATCAAGGAGGGAGAAGAGTCCACGGAAGACTTCAAAGAA
ACAGTTGCGGGCAATAAAATCTGGGGATGGGATGAAGAAAAATTAGAGGGAGGATATCCA
TGGGCGCAATGTTATGGTGGGTGGCAATTTGGCTCTTGGGCAGGTCAATTAGGCGATGGA
CGAGCAATCTCTTTATTCGAGACGACAAATCCGAGTAGTAATGTTCGATACGAATTACAA
TTGAAGGGTGCAGGAATAACGCCATACTCCAGATTTGCAGATGGGAAAGCTGTGTTGAGG
TCAAGCATAAGGGAGTTTATTGTCTCGGAGGCTCTGAACGGATTGAAAATCCCTACTACT
CGAGCTTTATCCTTGACTCTCTTACCGTTTTCGAAAGTCAGGAGGGAAATAACAGAACCT
GGGGCCATTGTGGCAAGATTCGCCGAATCTTGGTTACGTATTGGAACATTCGATATACTA
CGAGCGCGGGGTGACAGAGCTCTAATAAGAGAGCTTTGCACATACATTGCGGAAAATGTA
TTTCAAGGATGGGAATCATTACCAGGAAGAAATTCTGCAGACGATGGCAAAGCAGAAAAT
ATTGAAAGAGGAGTATCGAAAGATACGATTGAAGGTCCGGCAGGTTTCGAAGAGAATCGC
TTCACTCGTTTATACCGCGAAATTGTACAACGCAATGCAAAGACAGTTGCAGCATGGCAA
GCATATGCATTCACAAATGGTGTACTTAATACGGACAATACATCCATCTTTGGTTTATCC
ATTGACTTTGGACCCTTCGCTTTTCTCGACAATTTCGACCCTAGTTATACTCCCAATCAC
GATGACCACATGCTACGCTACTCCTACCGCAATCAACCAACCATAATATGGTGGAATCTC
GTCCGTCTAGGTGAATCTTTCGGCGAACTAATTGGCGCTGGTGCTGGTGTCGACTCCGAA
GAATTCATCGAAAAAGGTGTTCGTGAAGAAGCCGCCGACGAACTAGTCTCTCGAGCAGAA
GCTCTCATAACTCGCGTCGGCGAAGAATACAAAGCCACCTTCCTAGCAGAATACAAGCGT
CTGATGACCGCCCGTCTCGGACTCAAGGTATTCAAAGAATCAGATTTCGGAACCTTGTAC
AGCGAACTACTCGATACAATGGAGAGCCTAGAATTAGACTTTAACCAATTCTTCCGTAAA
CTCTCCTCCATCCCCATCTCCTCCCTTGAAACCAGCGCCTCGCGAAAAGAAGTTTCCACC
CAATTTTTCCATCACGAAGGCGTAACTGGACTTAACAACACCATGGAATCAGCAACCACT
CGTCTCGGCGACTGGCTCGAGAAATGGCAAGGAAGAATATATGAAGATTGGGGACCGGAC
GGTGACGACGAAAATCGCATGATAGAAATGAAGAAAGTGAATCCAAAATTTATACCTAAG
GGATGGGTTCTGGATGAAATTATCAAGAGGGTAGATAAGGGAGGCGAGAGAGAGGTATTA
AACAGAGTCATGAAGATGGTGAGCGATCCATTTAAAGAAAGTTGGGATGGGGATAAAGAG
GAAGAAGAAAGATGGTGCGGAGATGTGCCCAGAGGTGATAGAGCTATGCAGTGCAGTTGT
TCTTCGTGA
>1568ebfe-ab77-4c68-b9ab-d7ab0fab9724 (mRNA) 1686 residues [BFAB_07:722947-725785 - strand] [cds] name=Bfab07g02010.1
ATGTCTGAATTCATAGGATCAAGGATATCCTTGGTATCAAAGAGTGATATTAGATACGTC
GGTACACTTCATGAGATCAACTCGGAAAATGCAACGGTGGCCTTGGAAAACGTCAAGTCT
CATGGGACCGAAGGACGAAAGAACAACCCCGATGAGGAGATTGCAGCTTCGGATAACATC
TACGAGTACATTGTCTTCCGTGGTGGTGATGTAAAGGACCTGCGTATCGAGGAAGCGCCT
GCGCCCAGAGAAAGCAACCCCCCACAGGTGCCCAATGATCCTGCGATTCTCGGAAGTGGA
ACTCGTCCAGCTCCCACATCCGCGCCAGTACCCCCAACCCCTCAAAATCAAAACCCACGA
GGACCTCCACCGCAAGGACAAAATGCTCCCCAGCAACAAGGACCACCTCCAGGCATGGCT
CCTTTTGGGCAATATCCACCTCCTGGATTTTACCCTCCTCCGCCTGGAGGATGGGGTAGA
GGAGCTCCTCCTGGTCCAGGGTTTCCAGGAATGTCACCATTTGGTGGTCCACCAGGCTGG
TATCCCCCACCTGGACATGGATTCCCTCAACACCCTGGCCAATTTGCCCCTCCTCCAGGC
TATGGCTTCCCACCACCAGGTCAACACTTCCAACAGCAAAATCAGCAACAAAAGCCATCG
CCAATTGGACCTGGTGCGAATAAACAGCAGACTCCGACTTCCGCAAACCCAACAGACAAA
CCAGCAGATGCTCAAGCTCCTGATGCTGGAAACACTGCTGCACCAGCTCCCAAGCAAGCG
ACACCACCTCCTTCCAAGACTTCACCAACTGAAGTAGACGCAAGCACTACGAAACAATCT
CAGCCTACAGCCCCTCCCGCTGCTCGAGCTACCCCAAGTGGACCTAGAAGCGGCGGTCGC
GTTCAACCAGCAATTCCATTAGCTAGTCCTGCAGTAACCAAAGCTCCATTACAAAACACC
ACTGCCCCTGCAGTTCCAAAACAAAATGACTCTTCTGCAAGTTTGAGAGATGCCACACAA
GCTGCGACTGCCGCTGTTGCTGCCGCAATGGCTAAACTCCCTCCAGTTGGAGGTCAACAA
ACCAATGGAAGCGCCGTTGACAATCTAACCAGAAAGGTCAACGAAATGCGAACAACTGAA
CCTGTTCGCGCCCCCAGACAACCAGGCACTAATGGATTTGCCGCGAGAGGGCGAGGCCGT
GGTGGCCGTGCTCCTGGTCCAGCTAAAGTCGATGTCCCCGCAGCCGACTTTGACTTCGAA
TCTGCTAATGCAAAATTCAACAAGCAAGACTTAGTTAAGGAGGCTATTGCTGGATCCCCA
CTTGGGGAGCAGCCTCCTAACAATGCTTCCGCGCCTGAAGTTGAGACTGAGGAAACTGCA
CCCAAGGCATATAACAAAGCCACATCATTCTTCGACAACATTTCGAGTGAGGCGAAGGAC
CGCACAGAAGCTGCCGGAAACAGAGCTGGTGGACATCAATGGCGAGGCGAAGAACAAAAG
AAGAATGTTGAAACCTTTGGCCAGGGAAGTGTTGATAATGGCGGCTATCGTGGAGGATAC
CGCGGTCGTGGTCGCGGCCGTGGTGGGTACAGAGGAAGAGGCGGTTATGCCGGTAATGGT
CAGCCTACACGTGGCCGTGGTACGGGATATCGAGGTCGTGGTGATTCCCAAGCTGTGGCA
CAATAA
>696fcf18-2d2e-4043-af1d-389aa2d8a4e2 (mRNA) 618 residues [BFAB_07:726074-727898 + strand] [cds] name=Bfab07g02020.1
ATGGCGACAGAGACTTCAGATCAATCAGCAAGCAGTGATATCAACATTTACAAGGATCTC
GCATCATACTCGTGGGATACCGATAATGAGTTCCAGGGCGGTCTATCAGCTATATTGGGC
AATGCATCTTCACCAGATCAAATCCGAGAATTGACGCTTCGGGCTCAGTGTTTCTATCTC
TCTCGTAAGAAGAAGATTGATATCAATTTTGATGGATACAAGGCATATCTGGCATCTCAT
ACATCTACATCTTCTTCTATTGATGCCCCTGCGCCTGATAGCGCCACTTCATCAAAGGAC
ACTTTATCTTCCAATCCTCCACATCCCGATCATGAAAATGACCTACCGCCTGCTACCACC
ACAGCCGATGAAATGGCCCCGCCACCGTATCCTCCATCCTTTGCTGAAATTGTCGCTTTA
ATTACAACCGGTGCTACAATCCCAGGTATCCGTGATATTCCCGATACAGTTCTGACGGAT
CAGGGTACCAAGCCAGTTGCACGAAAGCGTCGTAAGCCATGGGAGAAAGACGTTGACGAG
GAGACAATTCAGGGTGGGGGGACATTTGGCGACCACCGAGATACCATTATCCAGCAAGAA
TATCCAACTGACGTATAG
>a178a541-789f-4ed0-87ee-ce0be541c764 (mRNA) 513 residues [BFAB_07:728456-729549 + strand] [cds] name=Bfab07g02030.1
ATGAAGGTCTTTTTGTTCATCTCTGCACTTGTTGCATTCATCACAGCTACCCTGGCTGGA
ACCGTCCCTCTCGAATCCAGACAATCCATTGTCGGATTGTGGGGAAAATCAACTGACATT
CCGGTTCAATATTGCTACATGGACGCCGCTTGCATGCAAACGCGAGAGAACTGGCAATTC
TGTCAAGTCGATCTGTTCAAGAACGTCAGTGAACCTATTGGCAATCCGAATGCTCGCAAC
GAACTAGTTGCAGACTGTCTTTGCAAAGCCGGCATGCCTGACTTAACATCCGAATGTCTT
GCCTGCATCAGTCTTGATAGCCAAAATTTCTTGGTCCAAGAAACTTTGCACACACATGCT
CTAGATGTGTGTGCTAAGAAAACTACTCTTAGTCAATATGAAATTTATGCATTTCAGTTC
GGAGGCGCGGTGCAATTTCCTCTTATCTTGCCATCGCTTTGGCTTAATGGTACTAAAGTT
ACTTCCCCGGATCAAATTCTCATTGAGCAATAA
>696cb677-4a6b-460e-ae27-8a6e295ca59b (mRNA) 1311 residues [BFAB_07:729924-731573 - strand] [cds] name=Bfab07g02040.1
ATGCTTCGATTTATTATTGATTTACAAAGAAAAAGACTCGAGAGAATTTCAACAGCTGTC
GCAGATCATGCTATAGTTCACGGGTACCAACAAGCTTCGACTGAAATGGAAGAATCTCAC
AGAAATCTTCTATTTTTCCACAAAGTCAAGACCATCTCGAAGAATTTGTTTTCCAAGGTT
TATAGTTCGCCATTGAATCATAACTTGGGCACAGATACTACAAGTGCTGATAAAGTACAG
AGTAATGGAGAAGTTCTCCATGATGATCAGTCGTGGGAGGACGATGAAAGGACGTTCAAT
AGATTTCAAGACTTACCGATTGAGTTAAGACTTGACATTTTGGAATTGTATCTCCAAGAA
CCACGTATTACGACATTGAATTTCGTTTCATCTGATCTTCTACAACATGACCACATGTTT
GGAAAACGCTTTCGTCTCACTTGCGGTTCCTTGCCTCCAATATTATGCCTCAATCATGAG
TATCGGAATATGTTTCTTGACAGGTTCACTAAGCCAGGAATAACAAGATCGCAGACAACG
CTGAGCATTGAGGATGCATTAAAATTAATCGACAATGAAGAACGCAATACAGCCTTGCGT
GATTCATTCAACGATGGATCACCCAGTGTGTTTCCGATATATTCAACGCGCACGCAAAGA
AACATAATTTACGACCCTGAAGATGTCATCTGGATCCAAGGGGACTTTTGGCTCGACGAA
CTGCGAAGATCAGCACTTGCTCGCTCAACCTTTCACAATCTAAAATATCTCGCGATTCCA
TATAAAACAAGGCGGAAATCTCTTTTCGAGCTGGAAGACATGTTGAACTTCCTCAGTTGC
ATCATCTCAACGTTTGCAAATCTCAAGGGCCTCATCTTGGTATTGGAAGTCGAAGATGTG
GTACCGGAGAGACCAATCTACAACGGTGAAATCCATTTTTATGCCCCGGAAAAAATTCGA
ATGGTCTCAAGTGTCCCTCAGGATGTCTCTGCCAAATCCCGGGAAACTCTCTCGTCACGT
TGGAGGAAGACATTAGGCAAGCCAGTGGCATCGCCAGAAGTACAACTTCACACTGAATAC
TGGTCAGCAAGACTATTAGCATCAGATGCATGGCACATACTCGACTACATTAAAGCGCGT
GCTATTAACGCTGGGAATCGAGGCTTATCTGTTACTCCCTGGAAAGATCCAAGCGAGGTA
GCAAAATGGGAAATACCGTTCATTCAAGTGGTTACTGCGGGTCTGAGTACATCCAAAGGC
GAAAGAGATATAGTGCCCACAATCAGATTAGAGAATTGGATCGAGGAATAG
>69297165-8178-46f4-bceb-9ff06cf6bbcb (mRNA) 1176 residues [BFAB_07:733644-735056 - strand] [cds] name=Bfab07g02050.1
ATGTCTTCCAACGAGGATCAAGAGCTTTCGGCCACCAAAAGAGATTCAATTTCGAAAAGA
CCAGACTTCTTGCACTCTGCACTCAATAATCTTGGCCTCAATTATGTGCAAACACGTCTA
GTGGGTATGCTTGGTGTGGAAATTTTTGATTCTAAAACCCCTAAAATCACCGACAAAAAG
AGATTCAACATCACTGTCGCAGGAAAAAGCATTACTGTGATCACTAACGGGGGCGATTTT
GGGTTATTTGAGTGGTTTCCAACCGAAATCAAACTTAAAATATGGGAATACGCATTGGAG
GCTCCAAGAATAATTTCCATATCATCCAAAGCTATGAAACGGAATTCCTTCGGCATCATT
CCTGCTCGATTTTTCTATAGTGGTCCACAAAATTCTCAGCTATATGTCAATCATCTTGCT
CGTCAACAGGCCATTCGAAGATCAAATCCTTTAAATGAACCCAGGTTCTCTCATGATAAT
TCCAAATCATTACTAACAACCACATATGATGCCGCTAGTGATACAATTTGGATCCGCGAC
ATCGACTTTTGGACATATCGAGACAGAAGAGGTCACTGGTTCGGTATTCATTTCAATTGG
ATGACCCGAAGTTTGGCCATTACTGCATCATCTCCAGAGGCTCTTATGAAATGGACAAGT
TTTCATTGCTTATCTTATATTCTTGCTCATTTCTTCAGTGAGTTGAAGGAACTGATCGTC
ATCATGGATTATCTTGATCTCACAACTCCTGGTGTATGCGACGAAATTACTTTTATAAAT
CTCACGCCAAAAGGTTTCTCGGAGGACCGCGCTATGAACAAGTATTTACCAAAAATTCTT
TCCTTGTCTGAAGAGTTTATAATTGGTGTGATTTCTGGGGAATGGAAGCCAGATTATTGG
TACACATCGGTCTGTTCTATGACCCAGTTATTGAAGTCCTGTTTCATGCGGAAGCAGGAG
ACAACGCAGGCAATACCAGATCCAAATAAGACTATTTCAGCAGAGGATGTGTACTGGGCT
TTTCGGAATAAAAAGAATACTATTGAGAGGTTTAATGCTCAGGCAGACGAAGAGAGACGT
AAGAGAACTGAAGTATATCGAAAATGGACTGTGCCATCTGTGAAATTCCTAGCCGCTACT
ACTTACAAGCAACTCAAGAAAACAGATCGCAAGTAG
>4a4815c0-2f13-4eaf-8001-7286a1ad3f10 (mRNA) 1425 residues [BFAB_07:736081-737760 + strand] [cds] name=Bfab07g02060.1
ATGACAGATCACGCACCAGGTTCTCACTTATGTGATGACAATGAACCTAGAGAAATGAAG
CTTCAACAAAATATTGAGAATGAAGTTAGGGGTCTAATCAAAAAAGCAACAAAAAATGCT
ACTCAGAAAGATCTTCAAGGACTCAGAGATGGAAACTCAGAGATCAAAGCAAGACTGTCC
CCCTTAGATGAAAGAATCCTAGAGCTCATCAGAAAGCAAGGTCTTTACAAGCTGGTAGCA
GGAGGCCCTTTTCATGGAATGACACCTTCTGCTTTGGATTTTATCTACAAAACAATTGAG
GACAAAGACGTATCCAAAAATACCGAACTTCGTAAGAAACTCGAAAAAGCTCTGTCTAAC
TTGCAAGAGGAGATCTTCAAAGAAGATAAGAAAGCAACAACCTTGGAAAAGTTGCCCATA
TTTCCTCTCGAAATTCAGAAAACAATCTGGAATTGCGTACTTCTAGAACCAAAAGTTGTG
CGCATCGGTATCCTGCCAACAGAACGCACAACAGGAGAACCGGAATACCTCTGCGGCGAA
CTTTGCCAAACCGATAAGCACACACTAATGTTACTCGAACGAAATCACATTCTCAAGAGC
TCTCCATGTCCTCTTCTCGCCGTCAATAAAGACTCTCGAAGACAGGCATTAGAAGTGCTT
GGCCTCTTTTGGGAACAGAAACGCCCGTGTGAACAAGCCGATGGCGGTTATGTTTCATTC
AATCACATATATGTCAACTGGGAGATCGACACCGTATGGTTGGACTACAACCTCGCCGCC
GCATGGCGTGATAATAAAGTGGACCCAAGCGATAGACTGATCACACCAATGCCAGCATAC
GAAAAAGTGCGTCGTCTTGCGATACCAGCAGAGTCTATCGAATGGCCTTGCGAGAAATAC
GTATCGAATATCGGAGTAGCGATTGCAGGTTTCACAAATCTAAAGCACTTGGCTGTCTTA
GTTCCGCAGAAAGAGACAGCATGGAGCGACCCGATTTTGGTCACAACATTACCAGCCAAG
ACATTCTTCAACTTTCTAGATAACTTCGGTTTGGAATCACTTGGGATTGGTCTCGAGGAC
TTTATCAATGAAGATAGATACGGAATTGATATTGAGGAATTCAATATGCGTGAGCTGAGA
GATTGTGTATATGGTGCTTTTCAGCACACTCTCGAGGAATTCAATGCTTCAGATCGAGAG
GATCAAATTGCAGGGGGACATATACGCGATCTCTCCACCTGTGAATGGCCAGACGTTCAA
TACATGGAATTGAGCACAACAAAGAAGGAGAAAGTCAGAGCTAAAGCTAAGGCTCTACTT
GATGCTCTGCCAGCAGGTTCCTGTGAAATTGATGAGGAAGACACAAACGGAAGACGCAGG
GGTGTCAACCTCATTAGAGATGTTTTAATACATTCGCGAAGTTAG
>111d110c-241b-4e2a-8f71-d980dd6e0ebc (mRNA) 6747 residues [BFAB_07:738177-745632 - strand] [cds] name=Bfab07g02070.1
ATGACTCGACCGCACACATCACCTCGCGCCCGCTCTCCTGTGGATCGATCTCCAAGGCGA
TATCTCGACTCCCGCGATTCCGATACTTACAGAGGGGCTGCGCGCGGCGGTGACAGGCGC
CGATCGCCATCGAGCTCAAGAGCGAACACTGCCGCATTTAATCACAATCAAAATCGAGAG
CTTTTCTCAGATAGGCATACACTGTCACGAGATACAAACCGAGATTCATCATTACGCGAT
CCTCCTCGAGGACCCCGAGCTGGATCTAAAAGTTATATCGACCCCCCAAGCGGCCCTAGA
GGCAACAGTTTTGGCGATGGATATCGAGGCGACTTCGGATATCGGGGTGATTTCAGAGGT
GGCAGAGGTCGTGGCCGTGGAAGAGGTAGCTGGCGGGATGAGAGTAGGGACCGCGATCGG
GAACGGGATCGAGATAGAGAACGTGGCCGAGAAATAGAAAGAGATAGAGACTATAGGGAC
ATACGAAGAGATAATAGAGGACCTTTGGTACCATTTCGCGATGATCGAAGTCGCGATCGA
GAATGGGGCAGTCGGGACAGTTTTAAAGGACGAAGGCCTTCCTCTCCTCTTGGTAGGGGA
AGATCCCCTAATTACAACAGTAGAGATATTCGTGATGTGCCTTCAAGCCTGGAACTTGAT
CGTGCTCGAAGAGGCTCACGAGACGGTCCAATGTCTGTCACCTCGCCTTCATCCGAATCA
TCTCAACCATTTGTTCATGGCTATGGTAGGGCAAGAGGAAACGGATTAGCACGTGGACGT
GGACGGCCTTATAATTATGATGAACACTATCATCGACCCCAAGTCCGCAGTAGATCTCCC
GAACCGAATTTCCCTCGTAGAACTCAACCTTCTGCAACCCCCCCTCCACAGGTTCCTGCA
TTTGGTTCAACTGGAGCATCGGTTAGTGAAAGTCCTGTACCTGGTGTATCGGTCCCAACT
GCGCCCCGTTTTCATGCTGGCCGTGGGGCTCCAGGCAGTCTCTACGTCCCTGCAAAGTCC
ATAGTTCCGCAGTCCATTGAAAATCCCCCACTAGAGACCAGATCGGACACACAAGTCGGC
GCAACACCAGAACACAAATTCGATGAGTTAGCACGAGTTGACAAAAAACGTCGCCAGCGA
AAGCCCTTATTCGGTAGACGTCCACCCAAAATCTCGATTAGTGATGATTATTCCGACTCC
GATTTGGACCCCTTCAATGATGATGACCCCGAGGATGAGATTAATTTCGAGAGTGAATTG
GCGGAAGTCAGACGTAGCATGAACGATGCCCGCAACAGGCCCGACTTACCTCCTCTTGAT
CATTTCTTTCTTGTCAATTCGTTTAGAGATCTACCTTTGCTATTAGATACAAAAGAAGTT
CCGGATACTTTGATTGAATCTATTGGCTCCAAATCCGCAGCCGATATACCTTACACACCG
ATTGAGGAAGAAAATAGGTCTGGGCCTGAGCTTGAATCTCATTCCCAGCCTCAGCAGCAG
CCCGACGTAGTGTTGGAACCAACGAAAGACATACTATCCGCCGATTCCAAGCCCCTTGTC
AGTGAAGATCATCAACGCCCAGCTTCACCTTCTCTGAAATCATCTATTGCAGTAGCAACA
ATCGACTCGAGCCAAAATGAAAAACAACAATGGCATTCAAGGCAGCCTCGAGCTCCTGAT
CCAATAAATCCAGCTATTCCTTCCGAGGAATCCCAATCGCCAGCCACTGCAGTCATCGAA
GATACCAATTCCACTGCTGATGTGATTACAAAGGATTCTATCGCCAATGAAACAGCTTCA
GTGCCAGCAATTCATCCTACTCCATTGCCCATTGAAAGAAGTCAATCGCTTTTCGAAGGA
GAGTCTCGCGGCCCCATCAAACCCACCGAGACCAATGTTGATATTCCCAATTCCACAGTC
ACAAAGGTAGATGATGTGAGCTCAAAGGACCAGTTTATTGAAGAGAGTTTCTCTAAAGCT
GGTGTATCCGAAGAAGCTTCCCCAAAAGATGATGCATCTAAAGATACCGCACCCTCTGTC
ATTCAACCTGCGACCATTGAGCTCACAGATTCCCAAACTCCTACGACTGAGTCATCACTA
TTACCGAGAACTGATCTTGAGAACAACGCTTCCAAGAACGACACCCGAGATCTTCCCCCC
AACTTGGAGCTTCAGCATGCTGGTGCGAACGTCTCCAGCTCAGAGAGGCCACCTTCGCCT
TTGTCATCAAGAATCTATTCCGAACGTATCTTGCCGCCTCTTGATGACAAAATAATTGTG
GAAACATCTATGGATACAGCACCGCCTGTGTCAGACGAAGCATCAGGATTGGCTGCTGAG
AAAGATAGAAAGTCAGAAACCGAACCAGCTTACAGATTTCCATTATCTCTAGGACCTATC
GATACTGAGATCCTCCCAGATGCTCAAGCACCTGAAGATGATTCATTAATCAGCCCCAAG
ACACAGGGTCCAATTCAAAGACCAATGGATAAAGATGCAGATGGTGATCATCAGATGGAG
GGTACAGAGACATATGGAAATGATGAATCTGTAAACCAGGAGGTAATCAATGATATAGGC
AATTCTGGAGAAGATGATCGCCGTATTCAAAAAGAACAAGATGAACATTATGAGTTTGGA
CCGCCAAAGATGCCTTCGCCAGTGCCACAAGCCCCAGAACTCACTATGGAAATTCCCGAA
GAAAGCGATGATGATGAAGATGAAGCCGAACAAGCCGGATTCCAGCTTTTACGGCAAAAA
CTTGTTCAACAAGAAGCCGCTCTCGAAGAGGATCGCCAGTCTAAAATTCTCGACGCCGTC
AAGCACCCCAGAGATACAAAGACCCCTCCCCCGGAATCTTTGCCAATTTATGATTATAAC
AAATGGGACGAGGATCCAGAGTTCTTGAACTCCCTCGAAATAGCTCCCGATGCCGAACCC
TCTCTTACGAGATTCATCGAAGAAAAAATGGCGCAGAAATGGAGAAGACAGCAAGAAGAG
GGGAAATTGTGGGCGGACAACTATGCCAAATACCGCACATTCACTGATATAGATATGGAT
CCAATTGCTGTGCGGAGTAGAGAAGCATTTGCTAAAGCCCAAGACAGGGAAGCCGAGGAA
TCAGTCGAACGAGGCAAATCGGTAAATGGTTCAGATCCGAAAACAGAGGGTCAGCGGCGC
ACTGGGAGTAGATTTGCGACAGAACACGACATAGAACGCGTCCTTCGTGAATCCGAGCGT
GAAGCTAAAGAATCGAAGGAACAACAAGAACAGGATGCTAGGGAAGAGACTGCAAACTCC
AAGGAAGCGAGCATTCCAGATATGTGTTGGGATGATGAATACAAAGAAACTATGTTTGTG
GATACTACGCATAAAGTTCCATTTGAACGATCATTTCGTATGCTTGAGTTCGGAGAATCC
ATCGACAATTTTACGGAAGAAGAGGCTCTGATTTTTCGAGAGAAGTACTCCCATTCTGGC
AAACAATTTTCTGTTATCGCGGAAAGCCTTCCACATCGTGATTACAAGGCTTGCATTCAG
CACTATTATATTATTAAAACAACCGATGAATGGAAAGCGATCTTCAAGAAGAAAAATAAT
CAAGTTAAAACTGGCAGGAGGAAAGGAGCGAAAAAATCTAGCGTCCTCATTACCAACATA
GAGAATGGAGGCGGCAACGACACTGATGCTACACCCGATGTCGAGAATGGAAATGAACGA
CGTCGGCCTAGGAGAGCTGCTGCTCCAACTTGGAATTTTGAAGCACCGCCTCCCACTGAC
AATGAAGGCGCAAGCCCTGCACCAACCCCAGCGAAAAGAGTTGCTACCCCAAAAGGAGAG
GCAAACGGTGACTCAGCTCCACCCAAAAGGAAAGTAAAGGTTCCACGAGAGAAGGTTCCG
AAGCAACCTAAGGGCAGTCAACTTCTAGCAGCTGCCCCATCTCCTGCTGCTCGAAACGAA
GAATCGCCAAACCCTCCTCCATCAACCGCTGCACCCGAGCCTACTCCAATTAGGCCTCCT
GTAGCTCCTGCTCGGTTCCCTCCATATGACAGCATTGTTCCTCAACAAATCCCATCATTT
TCACCACCATTTATGACACCTGAAAGACCTACACCAGCTAATCTAGAGGTTCCAATTGCA
CCCGAACGTGTTGGCTCTGCCCCTCCAACAACTGTTGAAACTCAACCAGATCGTCGCTCT
GCTGCCCAACAACAAACTTCTAGTTATTGGAGTGTTCCAGAGGTGCATGATTTTCCTGAA
TTACTGCGACATTTTGGTACAGATTGGCAAGGAATTGCAAAACATATGGGAACAAAAACA
CATACCATGGTCAAGAACTATTATCAACGCTCGGTTGATTCTGGAAGTAAAAAAGAATGG
GAAACGATCACTCGAGATGCTGACTCGAAACGCGAGAAAGGCGAATCCACTGGACCGGCT
CCAACACCGTCAGCTCCGACAAAGCGACGATATGACCCCACACCCGCTCCTCTATCAAGA
TCAGCTTCCGCTATGGATCTCGATGAATTGTCTGCTAACCAACCTATAACTCTTTCCCAA
ACCTCCCCTCCTCAACCCACATTAAGTACTAGGTTCCCAGCTTTAGCTCAAGCTGGACCA
GTTCCCCAATCAATGAATCAAACGATAACACCTAGTTCCTTGCCGTCTAAACGCTCCCAT
CATCAGGCTAATCAGCACAGTTTAACTCAAATCCCGCAACAGCAACAACCGATATCAGCA
TCACCGTCAACAGCAGCCTCTCAGTTACAACCACAACCACAACCAATTCAGAGTCAGCAA
GTCAGACAACCAAGAGGTCCTGCTATGGGCTTCTTCACGACTGACAATCAACGTCCCACA
TTACAGAGTAATCTTTCTCAACAATCTCAAACTGCTTCACCAATTTCCGATCCAATCACA
CTTGCTTCTCAAAGATCAGCCCGGGTCGCCGAGGAAGCCCATCGAGAGAGGCAGAAGGCT
CTCGAGCATGAGGTAGAACGAATGTCACAGGAACAACAACAAGCCATAAAACGGCTAGCT
TTACAAGACCAGGCCAGACGAGAACAGCAGGCTATTCGAGAACAAGCTGTTCGAGAGCAA
GCGATTCGAGAGCGAGAACAAGCCCTTCGAGAACAGACACATCGTGAGCAACAACAGCAG
GCTTACCAAAGACGAGAGCAGATAAGAGAAATGGAGGCTATCGAGAGGCAGCAACAAAGG
GAAAGGGAATCAAAACAAGAGCAGTTGGAACGAAATTTAAAGAGAAAACAAGAGCGTGAT
CATGAGCAGCGTGAACAACGAGAACAACAAGATCGAAAAGAAAAGCGAGAACAGCGAAAC
TTTCAATTGAAGCAGGAGGAAATTGATGTCCGAAATCCACAACAATATGAACTATACCCT
GCACACTCTAGCCGTACAGGATCAATGGCACCTACAAGACCCGAGGTTCCATATCCAGCA
GTCACCGCAACGGAGGTCCGAAGACAAGCACCATCTTTAGCACCAAATCAACAATATCCG
AGAAATCAAGGTGTCAGAAATTTGCTTAGTGATGGCATGAGTGTTGCTCCAAACTTGATT
CCATCTCCCTCTCCAGCTTTCGGTCGATCAGGCATTAGTACCCCACCAATTCAAGAGCAG
TATTCAACACCACCTCCCCCACCAGCGGCTGTTGCTGCTATCCGTCAACAAGACACACCA
AGAAAGACTTCCAATATCATGTCACTGTTGAACGATGAATCCAGTGAACCTAGCAGAGCT
CCTCCCGTAGCACAAGTCCAACCGAAGAGAGTAGGTGGTGCAGTGGCAATTCCCATTCAA
AATTCTCGAACTCCACCACCTCAGCGTTCATTACAGACTTCACGATTTTCATCGCATTCA
TCTCAACAGTCGCAACAAATATCCCAACAGATCCAACAAAATCAGCAGATGCAACAGGCT
CAACATCAAATTTCTTCTCAAACGAATCCACAGCATGGTTATTCCCAATCATCTTCCCAA
CCTATGCATCAACACTCATCCTCCGTGGGTCGCAGTTACACACCAACATCTTATGAAGGC
CGAAGTCATGCACCCCCACAAACTGTACAGCATCACCAGATGTATTCTCAACCCCCTCGT
CAAACAATTGGTTCGCAGTCTTCATCTATTCGTCGAGAGCCTCTACATGAAATAAATGCT
CCGAGCGGATATACACGAAGCCCAATTACGAAGCTTAATGAATCGCCTTATTCTGCTACT
CCTCCTCCTGCTAGTCAACAGATGGCACGTCAGACAATGTCTTCCCCTCATGACTTACCT
CAAGCTTCGGATCGTGATATTTATAATCGTCAATCACAGTTCGCTGTGCCACAACAATCA
AATACACCAGTAGATTTCCACTCAGCACCTCAAGTGGCAGCCAGTCATCGATCTATGGCA
TTCGGACAAAGTGGACAAAGTGGACACCGAACTCCACCGGCACCACGTGGTCAATGGATT
CAAGGTCATCAAGTCGGTCATCATGTGCACAATTCACGACAAAATAGCTTCGATGCCCGG
AACTACAATGCTGCTCCATCTACATCAGTTTCAGGCCAGCAAGGTTATGCCCAAGCACCT
TCCCACCACATGCAATATCAACAACAACAAAACCAAGAGCGATTTGATCATCACTATGAG
AGAGAGCGTGAGAGAGAGAGACAAGAAAGGGAAAGAGAACAACAATATTACCGAAGTCGG
GATGACCAACGGGACCCGCGAAGATAG
>03cda27e-3284-4654-99be-37a0a0b45e95 (mRNA) 1122 residues [BFAB_07:746255-747653 + strand] [cds] name=Bfab07g02080.1
ATGGCCTCGACATCCAATTCCGATGGAGCACCTCCATCCTCCGTCATGGATGCAGTTCTC
GTCCCTTCAAACGAAATGCCAGTCAATGCACAAAAAGTCGAAGAACTCGACTTTAACAAA
CTTGCCGGCCGTCCTATTACCGTTGATGATCTATTGAGTGGCATGAATAATATGGGCTTT
CAAGCCAGTTCCATTGGTGAAGCTGTTCGAATAATTAATGATATGCGTGCATGGCGTGGT
CCAGAACCATCAGATCGTACCACCATTTTTCTTGGATACACTTCAAATTTGATCTCAAGT
GGACTTCGTGGTACTCTTCGCTATCTCGCTCAACATCGTCACATTTCTGCAATCGTCACC
ACTGCCGGTGGTGTCGAAGAAGATATCATTAAATGTCTTGGTCCCACCTACATGGGTTCA
TTCTCTACTCCTGGAGCTGAGCTACGTGCCAAAGGTCAAAATCGTATTGGAAATCTTATT
GTTCCCAACAACAACTACTGCGCATTTGAAGACTGGGTAATGCCCATTCTCGATACCATG
CTCGCTGAGCAAGAGGAATCAAAGAAAGATCCTGATACTGACAACCACATACACTGGACT
CCCAGTAAAGTCATCAGAAGATTGGGCAAAGAGATCAATAATGAAGATTCACTACTTTAC
TGGGCTTACAAAAATGATATCCCTATTTTCTGCCCAGCACTTACCGATGGTTCCTTAGGC
GATATGCTTTATTTCCACACTTTCAAATCTTCTCCAGCTCAACTCCGCGTGGATCTTGTT
GAGGATATCCGTAAGATAAATACTATGGCTGTACGAGCCAAGCGAGCAGGAATGATTATT
CTAGGTGGGGGTGTAGTCAAACATCACATTGCGAATGCCTGTCTAATGAGAAATGGAGCC
GAGAGCGCTGTTTACATCAATACTGCGCAAGAGTTCGATGGAAGCGATGCTGGAGCAAGA
CCTGATGAAGCAGTTAGTTGGGGGAAAATTAAGGTTGGAGCAGATAGTGTTAAGGTTTAT
GTTGAAGCAACTGCCTGTTTCCCACTGATAGTGGCAGGTACCTTTGCAAAGGACCAAGAG
AAGAGTGTATCTCAAGCAACTTCAAATTCTTCGGAAAATTAA
>dfb8d112-dd74-4e1d-9eda-e93193ddaec9 (mRNA) 660 residues [BFAB_07:748696-749690 - strand] [cds] name=Bfab07g02090.1
ATGGAGCCAGGCAACGAAAGAAGAGTTACCCAAAAAGTGCCAGAGGATGATGTAATTAAA
GGTGTTGAGCTTTTGTTTTTCATGAAAGCAAAGCCTGTATCCGATGCCGACGCTATCTTC
ATTGAATCTCTGCGTCAACAAGGGGGATCCCCTATATCCGATGAACAGCTCGAAACTGGG
AGCTGTCAAGACACAATTTCTTGGCGAGGGTCTCCTACACCCGAGGACCTCCCAATGTCA
CCACTTAAGTCGGATAGCCCATGGGACAGCAGGGATACCAAGCCGACTCATGAAGCTACC
CCTCAACCAGTCGAACACGGTCCCGCGAAACGACAGCGGGGAGCCAAGGGTACCGGGCGT
ATCCCTGCTGCATCTGCCGTCAAAGCTGCTCGTCACCAAAAGAAGAACGACACCAGAAAG
CGACGAGCTGCTACACCCGGGCCGCCAATGACCGCGGAACAAAAGAGGGCGGCTAAAGAA
GCCAGGGACGCCGCGGACAGGATGCACCTGCAACGGTCGTTCAAAAAGCGCGACAGAGGA
GAGGTCGGTCTTGCATTGAATGCCATCGGTGCTCCACTACCAGGGGCGGGGATCCCAGCC
GAGTTGAGCATTAATGAGAGAAAATCTCGCTCTTCCAAACTCATACCAAAGCAAGAATAA
>7cf847fe-9875-4db5-b232-2c2e47d70f12 (mRNA) 1893 residues [BFAB_07:763702-767370 + strand] [cds] name=Bfab07g02100.1
ATGATGAGTCAACAGTATTCCGAGATGTTCCAGGATTACCCTCCAAACCGATCGCCAGCG
AGCAGTCGAGGAGCTTATGGCAACATGACGCTTAATCGCCAGTCATCGCGACAATTTATG
GACAATTATCAAGCACCTCTCCAAAATGGGGCCGGACTTTACGCTTCTGAAGACGCATCA
CAGTACAACGGAAACCAAGCCGGCTATAGAGGTCCTTCCAGCAACGTGAATTATGCCTAC
GAAAGTCAGACTTGGAACTATGGAGGTGCGAATGGAGCGGGTACAATGGGCACAGCAGGC
CGTATGAGACCTCAACAACAACAAGCTCGCAGAGCTGAAATTCCATCTGGTTGGATGAAT
CCAGGTACTCCATCCCTCGGCGGTCCAATCACCCAATCTTCCTTACAACAGCATAACTTG
TCTGGCATGTTTGAACAACCTCAGCATGCCCATCGTTCACCACCACCACCAAATCAGCAA
AGCGACCACGAGGAGCTGATCCCAACCGCTATTGTCATTAAAAATATTCCTTTTGCCGTG
AAGAAAGAACAGCTGACTGAAATGATGTCGAATATGGGATTGCCATTGCCATATGCCTTT
AATTACCACTTTGATAATGGTGTTTTCAGGGGTTTGGCATTCGCCAACTTTACTGATGCT
CGCGAGACGCAACAAGTCATCGATGCCTTGAATCACATGGATTTGCAAGGACGAAAGCTC
CGAGTCGAGTACAAGAAGATGCTTCCAGCTGCAGAGCGCGATCGAATCGAACGTGATAAG
AGAGAAAGACGCGGTCAACTTGAAGAGCAACATCGCGCACCAAATGTGATCTCCACAGGC
TCCCTTCATACCGCAGGATCTATGACTTCTATGAATTCCGGCCTGAGAACCACATCCCCT
TCACCTGTAAACATGCGTCAAAATGTTGCCGCCACCAATGGCACCGCTGCAGAGTACGAT
TTAAATGATCCAACCACATTGAACTACTACACTGAGCTGCTCTTCTTCAAACAAGACGCC
GAAAGAGAAGTTTTAACATTCGCGCCTACAGTTTCTCCTGCCGATCGAAGGATAATCCAC
ACCTTGGCTCACAACATGGGATTGGATCACCACTCCCAAGGGCATGGGGAACTCCGTCAA
GTTCAAATTGTCAAGCCCAAGCTTGCCAGCCCACCTTTAAACCAAATCCAAGCTGGATAT
TACAACGAATCCCAACGTCGTGGACTCAACCGAGCTGCGACAATCGATTTCAGTGAGCAG
CGAGCCAACGACGCTGCCTACCAAATGCATACGCTCGGCCGACAAGGTTCCGGTCTTCTG
GATATCCCAGGTTCCCCAGGGGTACGTGACCTGCTCAGTGGTGATCGTAATTTACGAACC
GCCAAATCGTTTGCGGACTTGCGCTCTTACACGCCATCGCCTGTACCATCTTCGGCGAGC
TTTCCAGCTAATATGACCCAGAATATCGCTAGGTTCCAAGGCAACGATTATGGTCTCGGA
TCAGTTACAGGTGGAACTCCTAACTTGACTCCTACCTCTGCAGGACCCTTGGGTCTTAGA
GACGACGCATTCCTTGCCAACGGCATGAGTAACATGTCACTTGCATATGATCGTCAACCC
CGTTCGAACGCGCCCGGACGCATTGGCCAAGAAAGAGATAGCTACACACCGAATGCTGGT
CCCATTGGAAGCCAGCGTCCAGTCAATGGAAGCCTCGAAGATAGCAGCTCCAGAAATGGA
TCAAGCGCGGTTCCCGAGAGACAACCAAGAGGCCCTACTAGTGATCAATGGGGATCAGGG
TTTTCTCGCAACAGACAAAATGGTCATGGTAGCAAAAGTAGTGATGATTCTTCTGAGCGA
AATGGATTCACCTCTGCATCTCGGTTCATGTAA
>e5b733e8-e0b7-440d-8a24-113d09665e79 (mRNA) 1635 residues [BFAB_07:767869-770058 + strand] [cds] name=Bfab07g02110.1
ATGTCATCACTCTACAACCTCGAACCTCAACCTACTGCATCATGCATTCTACACACCACC
TCTGGCGACATCTCTCTCGAGCTCTGGGCGCAACAAATTCCCCTCGCATCGCGCAATTTC
CTGCAGCATTGCCTCGATGGCTATTACGATAATACGGTGTTTCATCGACTGGTGCCGGGC
TTCATTCTGCAAGGTGGTGACCCTACAGGTACTGGATCTGGTGGAGAATCGATCTACGAT
GGCGGCGCATTTTCCGAAGAAAATGGCGTGTGGCCGATGGAGGAGCGAAAAGGTCAAAAT
GCGGGATCGAGAGGAGTGGGATTCAAGGATGAGTTCCATAGCAGGATAAAATATAATCGG
AGAGGGTTGTTGGGGATGGCAAATGAAGGGAAGGATACGAATGGGAGTCAGTTCTTTTTG
ACTCTTGGAGATACGCCTGAGTTGATGGGGAAGAATACGTTGTTTGGGAGGGTGGAGGGA
GAGACGATCTATAATTTAGCGAGGATGGGGGAGGCAGAGTGTGGAGAGGGAGAGAGACCG
TTGTATCCTACGAAGATTACGGGGGTGGAGGTGTTGGTGAATCCGTTTAAAGACATGGTT
AGGAGGGAGAGGGTTGCAAAAATTGCGGTTCCCGAGAAGAAGGCTCCAGAAAAGAAGAAG
AAGAGGAAAGCTGGGAAACAGTTGTTGAGTTTTGGGGATGATGGGGAGGAAGGGGTGGAA
CAACCGGTTGTCAAGAAAAAAGCGAAATTCGACACGAGGGTTGTAATGGATGATGGAACT
GCAGATAATGAACCGGAACCGGAACCTAAGGCTAAATCCGCATCGAAAAAGAAGGCTCCC
AAAGCACGATCATCGGAATCTCCTCAATCGTCACCGGAACCCGAAGCAAGAGCACGTCCC
AAACCGTTGCCCAATAGAGCCGCAAAACTCGAACGAGATATTTCTTCCTCTCCAGAGCCT
CAAGTTGAAAAGGTTGCCTCTTTGCTAGATCGTACAAATGCGCAAATAGCGGAACTAAAA
GCATCCATGAAGCGAAATGTTCAAACAGCTCCCGAGCCTGAGAAGAAGAAATCCGCTTTG
GAAGCCATGATTCCAGCAACATCTGTTCGTGGACGAAAGCGCAATGCAACTGGAAAATCA
AATGCTAGTAACGATCAAGCATCTCTAGATATCTTACGAGCATTTCGAGAGAAACTGGAG
ACTGCACCACCTGAAAAGGAAGTGGCTAAGCCTGTATCACATGACGAAGCTGAATCCAAA
CACGAGGAAAATGGAACAAACGATGATGAAGAAGCTGCATTGTGCGATTTACACTTTATT
GCAAATTGTCAGTCTTGTCAATCATGGGAAGCGCAAGGGGAAGAAGAAGAGGAAGAAGAT
TTCAATGACAAAGGGTGGATGTCTCATGCGTTGAGTTTCAAGGAGGACAAATTAGGCAAG
GATCTCAGTTATAGGAAGAAAGCCGAAGAAGAATTGGTGGTTATTGATCCTAGAGAGAAA
GCTAAATCGCTGAGGGAGGAAATGAAGGCGAAAAGAGATGCGAAAGCTGGAGGTTCGACG
GGGAGAGAATGGGATATCAAGCGGAACGAGAAATTAGCGAGAGGATCGGCTTTGGCTGGG
AGAGGAGCTAAGTAA
>495e83a9-21cd-4934-bfc8-de598238e5b5 (mRNA) 2256 residues [BFAB_07:771392-774789 + strand] [cds] name=Bfab07g02120.1
ATGTATTCTCGTCATATGTCTTCCACCAATCCCAGAAAAAGAGCTGCACCGGGAGCCTCG
TCTACTATTCAAACACCGCAGATGCAACAAACATATGATGCAGGTATCCAGTTACCTAGT
GCCGAATTCTTGCGCTGGAATCAAAACTCTGATTCTCAGAATTTCGCAGATCCCACCGCG
AGCAATTACATGAATATGTTTGGAGCGAATGCCGGCCCACCGCAAACGACCACTGGCTTT
GACCATTCTATTGCCGCGCAAACTCATTCTACACAATTGGCTCGCCGTCCGAATGTGAAT
AACAATCGCCAACTGGTTGCGCCGCGGACGTACGACGGTCCGGCTGATGCTTGGGGACCT
TTTGACGATTCGATGATGGATTTACAGAATGGGCATGGGGTGAATGGGGAAAATGATGAT
ATTGAAGCTTTGGAGGAAAAGGCTGCGATTGCGAAAAGAGATGCTCAGTCAAAGAGAAAA
CAGATCCCACCATTTGTGCAGAAGCTAAGCAGCTTCCTTGACGAATCGAAGAATACGGAA
CTTATACGATGGTCTGATCGAGGTGATTCGTTTGTGGTGTTGGATGAAGATGAGTTTGCG
AAAACGTTGATTCCGGAATTGTTTAAGCATAATAATTATGCCTCTTTCGTGCGACAACTT
AACATGTATGGCTTCCACAAGAGAGTAGGACTTTCCGACAATTCGATGAAGGCGAGTGAG
AGGAAAAATAAGAGCCCGAGTGAATATTACAATCCTTACTTCAAGCGTGGACATCCAAAT
CTTCTATGGCTCATTAATAAACCGAAGGGTGGAACGAACAAGATTCGAAAGGAGGGGCCT
AGAAGAGGAAAGGCCGAGGAGATGGGAGATGGAGATAGTGATGATGAAGCTAGAGATATT
GAAGAATTTGGTCAGAGTAATTATACCAACAATGCCGCCACACATCGAGCAATATCAGCC
GCGCCGGAAGCTGGGCCATTACAACGACGAGAGATTGCAGTGGTCCAGGGCCAAATCTCT
GATATTCAAAAACAACAAAATACCATTTCACAAGCCATTGCACGTCTGAGAAAGGATCAC
AATCAACTCTATCAACAAGCCATGGCGTTTCAAAATCTTCATGAACGTCATGAGAGTTCG
ATCAATGCTATTCTCACATTTCTTGCTACGGTTTACAACAGAAGTTTGGATGGACAAGGA
GCTGAAAATATTACTCGGATGTTTCAAACTGGGTTAAATCAACAAGGTCCACATCAACAA
CAAGGCAATGTTGTGGATATCGGTGATCTTGGAACTCCTCAGCAGCAACAACCAGCTGGA
AGTGTCAGTCCGGCCATTCGTAAAACTCAAAAGTTATTGACAGCAGGACCACCGGAACGA
GAAAGTAGTCGAGTGACCGAGGCTTCAACCGCTAATTCTAGTCCAAGGAATCAGTATTCT
ACTCCACGTTCCGGAACAGTTGAAGAGCTTTTCGAATCTCCCAGTGATAGCACGACAACG
AAGACTGAACCGCAAAGAGATATGTTGAACATTATTCAGAACGCTAATTCACAAAGTCGA
CCCGAGAATAATGTCATGGACTTTCCGGATATGCTCACACATTACGAAAACGCCAATGGC
AATTCCCCGCTCACCTCGGAACAGCGCAGCAACATGCTTAATATCATTGCTAGCACTTCA
TCAGCTCCAGGTTCCAACAATGCACTGGTGAGCCCGGCACCTCAAGCTCCGGATCTAGCA
CAAATGGCCTACACTCAAGCTGAGATTGAAAACTTGATGGGGTTACAACAACAGCAGAGT
GATCGTATCGCAAGTCTTTCTGCAAATATTACACCTCTCAGTCCTTCTGGTTCTATTCCT
GGTGTTCAAGGCGACTCATATTTTAATGGTGCTGAATCTATTGATCCTCATAATTCACAT
CTGGATTTAGATAAATTTTTCGACTCCCAGGCGTTTTATAGTGGAGGTAGTCCCGGAAAT
CCGAGTTTTAACTTTGATGATTTTGGTAATGGGGTCGATGGGAGTGGGTATGGTGGTGGA
GACAGTCATTTTGATGTTGGTATGGATGGTGTGAATGATGGAAGTGTGAATGGTAACGGA
TCGAATGGGAATGGAGCGAGTAGGATTGTGGAGACGGTAGCGAGTAGCGAGTCGACGAGT
CCAGCGGAAGATGGAATGGGAGATGGGAATGGAAATTCGAATGGAAATAGTAATGTGAAT
GACAACGCTAGTAATAAGCGGAGGCGGAAGATTTGA
>eb3ddaa9-5f2e-4805-9013-fa1f79f84f06 (mRNA) 1809 residues [BFAB_07:779788-782790 + strand] [cds] name=Bfab07g02130.1
ATGGTTGAAGTTTCGACAAAACAGGTTATAAAGAAGGAGCTTCCTAAACGCTCTCGGGCG
TTCAGCACAAGAGCTAAGACGGGCTGCAAAACTTGCAAGGTTCGCCATGTAAAATGCGAC
GAAGGGAGACCCGGATGTAGGAAATGTGCTGCAACAGGTCGTCAATGTGACGGCTATGCT
CATTGTACGCCTAGTCCAAACCCCAAACCCAGTGCGCTTTCGTCTTCAATCGTCCCGAAA
TCTTCCAGCCGTGCTACACATCAACTACCTACAATAGTTCCCGACTTTTTGTCCCCGTCG
CTGGCTGTCAGTGACCAGGAACAACATTCGTTCCACTTTTTCCACACACAAACTGCGCCT
CAGCTTAGCGGTTGCTTTGGCTCAAAGTTTTGGGATTATTTCGTTCTACAAGCTTCACAT
CGTGAGCCGGCTGTACGACATGCAGCTATTGCGCTCGGGTCTTTGCATGAGAGGTTTGAG
TTGGAAGATAGATTTATCTCCAAGGTAAGGTACGATACTGAGGAAAATTCCTTTGCCGTA
CGTCAATATGTGAAGGCAATAAATTGTCTAGTGCAACCGAACATGTCCAAGCATACATGT
AAGTCGGCAAATATCGCGTTAACAACCTGCATACTATTCATATGCTTCGAGACTTTAAGA
GGGCACCACAACTCTGCTCTGGCGCATATCGACGGCGGAGTGAAGATATTTTCAGAGCTA
CAGGTCTCCAAACACTCAGCTCCTGTTTCACATGATCTGCCTGAAGATCATATTCCCGTC
TCAATATTCCGTATGTTATTCGGCAGATTAGATACACAAGCCTCGGTTTTAACTTCGAGG
GCACGCATAATTGATGGCGAATCTGGGTCTTCCCCAAACTCTATTCCAGACAGATTTTTG
AATATTGAACAAGCGCGCGAGGCAATGGAATCAATTTGGACATATAGCGCAAGGAATCTT
CTGTCTTGTTCCATGTATAATGGCGTTCCCCTTCCTCTCCCTACCAGCCAGGAAACCAAA
TTTCAATTGTTGGCTCATCTCGAGAATTGGAACCGAGCGTTTGAGTCATTTTCATGCATA
TCAACCGAAAGAGGTTATGTTGAGATAGTCAGCCCAATGGAAATGAGGGCGAGGGACCTT
CTCCGCCTACACAAAACCATGACTCAAATATTGGTCACGACATCCACAACACATTCTGCG
AGGTTTAACGAATCGAGTGAGCTACTTTGGGACGATTTTCAGTTGGAATTCGAGGCGATG
GTAAATTGGGCATCCGAGATTATCCGTACGCCATCAGATATCCAGATAGGAGGTCGTAAA
GCCGCAAGTTTCACACTAGACAGCGAAATACTGCAGCCCTTGTTCTTGATAGCCACGAAA
TGTCGACATATACGCATAAGAAACAAAGCTATCCTGTTACTAAACCAGGCTGATAGGCAG
GAAGGTCTATGGAACAGTCTGTTAACTGCAAAAGTGGCCGAGAGGATCCGAGAGATTGAA
GAGAGTGGATTGGGCGAGATGGTAGCAATAGTTCCAGAATCAAATCGCCTACGAAATATC
GATATGAAGTTTGAATTTGAAGGTTATAATGGAAGAAGAGCTTGGCTTGGATATAGGACT
TTCTCTGCGTACGAGAGCGGAGAATGGATCCAAATTCATGAACGCAACATCCCGTCTGAG
ACGTTCCAAACACCGAGTGGGTCGGGAGATTCGTCTTTTCAGGTTCATGATATTCAAAGA
ATGGAAAGAAGCAGGGAACACTCCTTCGAATCAGCATGGAGAGTCAGTATCAAATCAGAA
TCGTTTTAA
>add90964-355d-4427-9a6f-9b16fa45c9df (mRNA) 1362 residues [BFAB_07:784711-786480 + strand] [cds] name=Bfab07g02140.1
ATGATGGATCGCCGACCACCATATATAACTGTACCCAGCTATTCCTCTCTTCTCAAACAT
GGAACATCCCATCCCTCGCCTCTTTCCCCCCTAACTCCACCTCGACGACTCCATCAACGC
AGCCTGCTACCCAGCCCACCCATCTCGCCACATCTTCACAAACCCTCACCTCCTATACCA
TACCCATGGATTTGGCGCTGTCATATATGTCACTCCGTTTATCGTCTTGGAGTCACCCGT
CGCTGCCTCGAAGATGGCCATTACTTCTGTTCCATGCCCACTCCACCCCCATCTCCACAG
ACTGCCTCTCCCGTATCCCCATCTCCCTCCACTAGCTCCCTTTCTTCCCTGATTCCCCCC
AAAAAGAAAAAGAAGCGCCGTCGCCAACCCCGTGGCTGCCGCGCCGAATTTGACTACACA
GGCTGGGAACATTACAACCACTGGCGACGGGACGTCTCTCTCCTGAAAACCGAATCTCGT
TCTCTGAACAACCCACACTTCATCCCTCCATTAAAGATAGGCAAAGATTGTTACCGCGAC
TGCGATTTCCCCTCGGAATGTCAAACCCTACACTTACGACCGGCAGTAACCCCCAAAACG
CGACAAAAAAGCGAGCCGGAGTTAATTTTCCCCATTTCTCCCATCAGTGCCGAGGAACGT
CAACGCATAGATGATGAACGAGAAGATCAACAGTTGATATTTGATATAGCAGCTACTACA
CCCCCAGCTACTCGTGCTCATGGCGAATTCCACAATTCCGCGAATCTCATGCCCGATATC
TTGTCTCCCGATTTAAGTGTGCTCGTTGAGCGCGAACGACGCAAGAGTTTGGAAGCGGAG
AAACGCGGATTAGAGCACGAGGCACAATTTATTGTCAGTCCTCTAACAAGCCATACCGCC
TTTGGGGATATAAATTATAGCGGTAGTGGATCTACGAGTCCGAAAGGAAAAGAGCGTGAA
AATGAAAGACAGGAACCGAAAGATGGTTTGGGAGTCTCGTATCCTCCTGAGCTAGATGAT
CTAGCAGGAGAAGAAGAAACAGAAGAGAATGAACAGGGATATGTGAGGGAATTCATACGG
GTGAAGAAACGGAAAAGTATTGCGAAGATTGAACAGCTCACGGGATTGAGGTTATCAGAA
GTGCAGTATGGAAAAATGGTAGGAGAGGTGGTGGATGGAGATTCGGAGGGATCGATGGTG
GGAGAGGGAGAGGGAAGCACAAGTCGGCGAGCTAGTGTAGAGATTGAAAGTCCACCCAGT
AGTCCGTTGAAGATTTTTTATACAGTAGAGGATAGTGATGATGAGGATGATCTTGATGAG
GTCACCCCTTGGGATGAACATAGGAGGAAGCATATTCGATAA
>7dff7984-760e-4b07-a1a3-2ff5b0d12acb (mRNA) 432 residues [BFAB_07:786495-787699 - strand] [cds] name=Bfab07g02150.1
ATGGCCGGCGGAAAAGGAAAATCTTCTGGTGGAAAGTCATCTGCTGGAGGCAAGGTTGGC
GCAGATGGAAACAAGAAGCAACAGAGTCATTCAAGCAAAGCCGGTCTTCAGTTTCCTTGC
GGTCGTGTCAAGCGTTTCTTGAAGAACAACACCCAAAATAAGATGCGCGTGGGAGCAAAG
GCTGCAGTCTATGTTACAGCGGTCCTAGAATACCTAACTGCTGAGGTACTTGAGCTCGCA
GGAAACGCTGCCAAGGATCTCAAAGTCAAGCGCATCACACCCCGCCATCTACAACTTGCC
ATTCGCGGTGACGAAGAACTCGATACCCTCATTCGCGCAACTATCGCCTTCGGAGGTGTG
CTACCACACATAAACCGCGCTTTACTTTTGAAGGTAGAACAGAAGAAGAAGAAGACTATC
GAGTCCGCATGA
>8bca108b-dfcc-45d3-befb-697fa9a9be3d (mRNA) 1140 residues [BFAB_07:789225-790723 - strand] [cds] name=Bfab07g02160.1
ATGCAACAGCCTCTTGAATTCCCAAACGAATCCCTACTTAATCAAAATCGCACCTTATCC
TTCCACTCCCTCCTGAATCTCGCATCTCTAAGTCCTTTACGCACTTTCCTAGCCCGCGCT
CCCATATCATCGATTAGTTCATCTGCCTCCTCAACCAGCACACCAGCCCCTCGTATTCCT
CAAATCCACCCAGGCGAATATGAGACCTACAAATCAGTCAATAAACTCCTTTCAACATTC
AACTCCCGCTCTATTGCCAAAGCCCGTCGGGCAAGTGCCAAAGCCAAAGCCCAGCTTCCT
CAAAATGAAGAGGAAGATACATATCGTAGCATTCACTGCGGCGATCAAAATTGTTGTTTT
TCCTCCCCTTATTCATTTTATCGCACACGTTCAAGCTTTTCCTCCTCCACTACGCGATCT
AAAAATATCCGATCACAATCTCGATCCATTTCGAATCCAAATCTACGACTCGCGAGTTTG
AAAGGCGACGAGAAATCTGTATCCCCGCCTGTTTCCTCGTCGTCCCTACATCCTTTTCGC
AGATCCCTTACTATCACTGGAAGCTCGAAACGGTCAAATTCGCTTTTTTCGGGCAGTCCA
CCGCCACCGGGAAAAACGCTACGGCCTTTGTATGAATACCCTGAGCCGGTTGGACCGAGA
AGCTCCAGTTGGTTGAATGGAAAGCTAGGTATGAAGGTGGAGAGATCGAAAAGCGTGAGT
TGGGCTCGAGACATACCGGACAATTGTCAAAGAAGCGACAGTCAGCATTATCGACCAAGT
AGCTTATCTCTACTCTCATGGACGGCAGAGGATATTGAATTAGGCTTAATGAAAGAAAAC
AGACTAGTGAAGGAGAAATTAGGAAGAGAAATTGCTTATGAATGGGATGGTGCTTTTGGA
TGGACACAAGCTTGTAAGGAATGTGGAAGAGAAAGGTGTGTCAAATGCTCAGGAATTGTG
TTTGAACAGGTTGTTGCGGAGGGAGATACGGTGACTAGGAAGGAAGGGATGTTTAATATT
TGTACGCCGTGTGTACATGGATTCTGTCCTGGGACAAAAATGTGGTTGATAATTAGATGT
AAGAGGTGCGGAGAAGTAGAATGTCCGAGGGGTAGCGAGGTGTGTACTATGGAGGGGTAG
>2a5051bc-6d1f-4b96-bc19-9c68ee4f39e3 (mRNA) 1527 residues [BFAB_07:790787-792989 - strand] [cds] name=Bfab07g02170.1
ATGCCTTACTATGTTTTGAATCTTGGGTTTTTACCCGACCGAATATCGTTTTACGGGATC
ATAATACCATTTCTCACAATAGCACTCATGGTCAATCGATATCTCGTATGGTCTCGCCTT
CGCCATATTCCTGGACCAAGATTCGCACCATTCTCAAATTTGTGGAAGCTAAAATCAGTA
CTATCTGGCAGAATGCCAGAGATATTGAATGATGTGTCCGAAACATATGGCGAATTGGCA
CGAATTGGGCCAAATGATCTTATTTGTAGCGACCCTGATGTCATTCGACGTATGGGTACT
GCAAAGTTAGGATATCGTCGATCGAGATTTTATCAGTCTTTCGCTTTCAATCCTGACCAA
GATTCTATGTTATCGACTACAGATGAGAAAATTCATGCTGACCTGAAAATGAAGACTGCT
GCAGGTTATTCGGGCAAAGAAGTTGAAAACCTTGAGCAATCAATTGACAGGCAACTCAAT
GCATTCATTGACTTGATTGAGCGAAAGTATCTTTCAACACCGACTGATTTCCGACCTTTT
GACTTTGCCAAGAAGATTCAATACTTCGCGTTAGATGCAATTACAGATGTGGCTTTTGGT
ACGCCATTCGGATGTCTAGCTCAAGATCATGATATGTATGGTTACATCAAGACTGTTGAA
CGATTGCTACCGGCTGCTGTGGTTGCAGGAGTCTTGCCATGGTTGTTAACTCTATCACGA
AGTTTTGTTCTCAAACCATTCCTGCTAACAGAAAAAGATAAATTGGGTTTTGGAAAAATG
ATTCACGTTGCTAAAGACATTGTTGCGAAGCGATTTGGAGAATCAAAAGAGGTCCAGAAT
GATATGCTTGGCTCTTTTGTCGCCCACGGCCTCACTCAAGAAGAAGCTAATTCTGAGACA
TTACTTCAAATAATTGCTGGTACGGACACGACTGCCACGGCTATCCGAGCAATGTTGCTT
CACATTGCAGCATCTCCAACTTGTTACGCGGCCTTGCAAGCTGCTATCGATGAGGGCGTC
GAAAATGGCAAAATATCTTCCCCGGTAACTGATACTGAAACAAGAGCCCTTCCCTATTTG
CAAGCAATTATCAAGGAAGGTCTCCGAAAGTTTCCTGTAATCGCTGGACTTCTACCAAAA
ACGGTACCTGAAGGCGGCGATATTATTAATGGTTTTGTTGTCCCAGGTGGAACCGACGTT
TCACTCAGTCTGATTACTATTACGCATTCGAAAGCCACGTTTGGACCAGATGCACATATT
TTCAGACCAGAAAGGTGGCTCGAAGGTGACGACAACAATAAGTTAAGAAAAATGAATCTC
GCAGTCGATTTAGCATTTGGATCTGGGAAATGGTCTTGTTCCGGGAAGAATATAGCCATG
ATGGAGATGGGAAAGGTTCTTGTGGAATTATTTAGAAGATTTGATATATCCTTGGTAAAT
CCAACCAATCCATGGAAATCATTTAGTGCTGGGGCATATATACAATCCGATCTTTTCGTT
CGATTTACGAAAAGATCACATCAATAA
>b434383c-5462-4c61-9d4f-a61abb9c2e40 (mRNA) 1614 residues [BFAB_07:793250-795252 - strand] [cds] name=Bfab07g02180.1
ATGTTCGACCTAGCACCCCGCCCCGATGAACCTATCGTTATCTCAACGACCCATAAATCA
TATCGATTGGGAAAAGATAGAGGATTGCCACCCCACCTTGTTGGCGAACAGAGCAATTAT
CTCGTCGAACTAACCGATGAAAATGATCCTGCCAATGCGAAGTCATGGACTTTCAAAAGG
AAGATGAGAACAGCTGCAGTTCTTGGATTTGATACTCTCATCGCATCTTGGGGTTCATCT
GTATACTCGGCAGCTGTGGCACCAGTTGCGTATGAATTTGGTGTCAGTGAGGTCGTGTCT
ATTCTTGGTTTAACTTTGTATATCTGTGGTTTTGCAACTGGTCCCTTGTTCTTTGGTCCA
ATATCTGAACTCTATGGTCGAAAGAAACCTATCACTTTAGCATGCTTTGTTTTCACCTGC
TTTATGTTTGCTGCGGCAACGGCCAAGGACTTCCAAACATTGATGTTATGTCGATTCTTC
GCAGGTGTCTTCGCTTCTTGTCCTCTGGCTGTCGTCGGTGGCGCTTTTGCTGATATGTTT
GGAAACGAGACTCGAGGTATTGCTATTGCTGCTTTCTCAGCGTTGGTATTCATCGGTCCC
TTCATCTCGCCTATTGTTGGAGCATTCATCACCACGTCTCACCTTGGTTGGAGATGGACC
GAATACATCACTGGTATCATGGGTGCTCTCGCTTTCATTCTCGACATCTTGTTCCTCGAG
GAAACATATGCCAAGACACTTCTCCAAAGCCGAGCAGGAAAGATTCGAAAGGAGACTGGC
AACTTCGCCATTCACCACATCAGTGAAGAGGAGATTATCAGCTTTGATGATCTTGTCAGA
AAGCACTTGTTCCTTCCATTCAAGCTTCTCTTTGGAGAGCCAATTGTTTTCCTTATCACT
ATCTATACTGCTTTCATTTATGGTATCTTGTATCTTTTCTTGGAAGCCTACCCTATTGTG
TTCGCCGAATATCGTGGAATTGATCCAGCAGTTGCAACACTGCCATATGTGGGAATGATC
ATTGGTGTTCTCTCCGGTTGTGGTATCGTCATTGCCTTCGAGCCAAGATATAATCGCAAA
CTCAGGGAGAACAATGGTATTCCAGTTCCAGAGGAGAGACTTGTTCCCATGATGGTTGGT
GCTTGTATATTCCCATGTGGTTTATTCTGGTTTGCATGGACAGGAAACTATCCATCTATC
AACTGGGCCGCTCCAACTGTCAGTGGTATATTGACTGGAGCTGGCATTATGACTATCTTC
CTACAAGCTTTGAATTATCTTATCGATTCATATCTTTTCGTAGCAGCCAGTGCCATCGCT
GCCAACACATTTCTCCGATCTTTCTTCGGTGCTGGATTCCCATTGTTTGCCACAGCAATG
TTCCACAATCTTGGTGTACAATGGGCTGGTAGTTTGTTGGGCTTCTTGGCTATCGCATTT
TTACCGATTCCTTTCTTGTTCTACAAGTATGGTGAAAGATTGAGGAAAATGTCTCGTCAT
GCTCCAACCGATTTTGGTGTACCTAAGAATCAGCCAGTCGACGAGGAGACTGGTACTGCA
GTTACCACTGCAGCACCTTCGATTGAGGAGGAGAAACCAGAACCGGTGGTGTAA
>47d68888-0f26-4a73-9055-182016b0b483 (mRNA) 528 residues [BFAB_07:795821-797212 - strand] [cds] name=Bfab07g02190.1
ATGCTCTTCCTTAATACAAGCAGAATCATGCCAATGATAGCTGGGCTTCTCTCACTCCTA
TTGGTCACTGCCCCAGTCGTCAACGCGACCCCGATTGTCTCCAAGGCAGTTGATGTCAAG
GCTCTTGACGGAACAATCGAGGCTCGTGATGGAGGAATCGTTGAGGCTCGTGATGGAACA
CTCGCTCGTCGAGGAGATATTTGCCATCATGCTGACGATGGCTATTGCACCATAGCCGTC
ACAGTCACACGTGCAAGTCTTAATGCGGGAATTGATAATGATATGGTTTACCTTTTCGAT
AATTCTTGCCGTCCAATTGGAGGCATGTTTTCGGGCCAAAACATTGATATGGCCAGTCAG
CTTCCATACAAGATTATCGGTCACATGGCATTTGAGAACAAACGTCTTACTGCCTTCCCC
GATTTTTGCTATGCGGGAAGATGTACCACTGCGTACAATGGCTGCTGGATTCATTCCGAT
ATTGGCGATTTCCAATGGGTCAATCGTTGTCAATTCCGCTGCGATTAA
>2cb3319d-3550-4362-aecf-ef2a8ee5b9ef (mRNA) 1446 residues [BFAB_07:801806-804317 - strand] [cds] name=Bfab07g02210.1
ATGGCCAACCACATGTATTATGAACTCCCAGCGGATCCCATAGAAAGTACCCCCAGACCT
CTTACTTCATCACAAACACAACAGCAACAACAACCGCCGCCGCCGCCACCGCCACCGTTA
TTGCCTCCCCGGAATCCTTTGGCTTCATCACCTGACGATAATGAGGAATCAACAATTCGA
GGTGTTCCTGGAGATGACCCATCGGCTATACCTCTACCACTGTTTACTCGTCGATCGAAT
TCAAATCTTTTAAGTCAAACTTCGGCAAACTCTACCCACAATACTACACCAACGCCTTCA
AATCGACCTCCTGCACCCACAGTTGAATCATACGAAACCAACTCTTCCGATAACCCATCA
CCTCTCCCGCGTCACAGATCAGATTCAAATACCCACACCGGTCCAGCTCTTCCACCCCGA
AGAATCTCTCAACACAATCCAAATGAAGTTTACTATACCCGAGATTCCCATAGAGTGATC
GCATATCTCATACCTCTTCCTAAACCAATCGATGTTTCCGATGCAGACTTTCCTCAGCGC
TATCTAATATATACACCACCCGCTGCTCATCTCCTTAAACCTGCTGAAGGCATTAAAGAG
GGTAAACGTCATAAGGGAAAGAGAGTCTGGCAGCGCGAGGTCAAGAAAGCCAAAACTTAT
GATGGCAAAACGATGAGTCTTAAAGGACTTCATAGTAAAACTACCAGAGGAGTCGTCTGG
GGAATCAATTCCATCAAAAACACAGACATAACATTTCTCAACCGAGTGCCACGAAAAGAA
ATCGAAGAACTCCACCTGATATACCCACCTACTATTTCTTACTCACCAATCGACCTTCGC
AACCAATTTCTTTCTCAACTAACCCGCACCAAAGCCCGTGCTAAAAAGCACGCTGCAATA
TCTTCTCTTCTTCTTCTTCCCACACTTTTAATTGACACATTCGCTGCCGTTATCTGGCCG
TTCGGTGGTCTCTTCGAAGTAGATGCCGTATGGACTTTCACCTCTGTTCGCGGCTATCTT
GTATCTCGCTCCGTGACTAAAAGATTATCCTCCCAAGACACAATTCACGACCACGAACAA
ATGCGCATCCAAGACAGGGAATTGTACCTCCGCTTCCATAAATCTGAGCAATTGAAGATC
TTGGAAAGATATGTGAAAGAATTATGTCATAAGCAGAACCCAAAGAGATTTGCTAGTGCG
GGGGTGCCACCGACGGAAACGGAGGTTTTGAAAGCGATGGGATGGGAACCGGATATGAGG
GGGAGAGTTAAGAGTGGAGAGAGGGGTGGGATGCCTGAAGGTGGGATGAGGGATTGGGAT
GATGAGAGGTGGCAAGAAAGAGAGGTCAAAGATGATCTCCTGGGAGTTTTGGGGAAAGGT
GCAAAAAGCTGGGATGGCTGGTGTAAGAAGTGGGAGAAAAATCCAAAGAAGGCGGAGAAG
AAGTGA
>cf7b703b-5626-4074-8d40-47036e728026 (mRNA) 4578 residues [BFAB_07:806049-811536 + strand] [cds] name=Bfab07g02220.1
ATGGCTTCTGCTTCGGGTCATGACCATCATGATTATTTCCTGGAAAGATCGGAGAATATT
CTGGATCCTCAACCTCAATCTATATCAAATCACCAGCAGGATGTCGAGAGACCAGAATCA
TCAAGCAGCGACGACTCTCTGGATCCAGATACCACGTTGGAGCCTGTTCTAACCAACGAA
ACTGCACGAGAACCACAGTTCGAACCAATCAGGGCAGGAGATCGAGAACAATTACAGAAA
ATAGCTTCAGGGTTTGGGGGTTCTCAGCTGGGGAGATCCCTTACCAATGGAACGGCTGCA
ACACATGAGTTGGAGAAACAAGACACCCTGTATGGGGTTAAGTTGGGGGACTCAACATTG
GACCCCAACTCCCCAGATTTTGACGTATATAAATGGGCTAAGATGATGATGAGGCTGGTT
GATGAGAATGGAGTCATTCAAAGACGTGCTGGAATTGTATTCAAGAATCTCAAAGTGTGT
GGTTCGGGATCAGCAATCAACGTACAAAAGAATGTCGGCTCTCTATTAATGGCACCTTTA
CGATACAAAGAGTTCATCGGGAAAGGCCCCGAGAAGACTATTCTCAATGATTTTAATGGC
GTTCTGAAATCAGGAGAGATGTTAATTGTTCTTGGACGACCTGGTTCTGGTTGTTCAACG
TTTCTTAAATCTTTAATGGGGGAACTTTACGGATTGGACATGAAGGCACAATCGGAAATT
CATTATAATGGTATCACGCAGAAGCAAATGCTCAAACAATTCCGAGGTGAAATCGTATAC
AATCAAGAAGTTGACAAGCATTTCCCTCATTTGACTGTTGGAGAAACTTTAGAATTCGCT
GCTAGTGTACGAACGCCGCAACAAAGACTTGTTGAGGGAACAACTCGTTCAGCTTGGGCA
AAGCACATGACTAAGGTCGTCATGGCTATCTATGGATTATCCCACACGTACAACACCAAA
GTCGGTAATGATTTTGTACGAGGTGTATCTGGAGGTGAGAGGAAACGTGTTAGTATTGCT
GAGATGGCCTTGGCTGGTTCGCCAATTGCTTCATGGGACAATGCTACACGTGGTCTGGAT
GCTGCAACTGCTCTGGAGTTTACAAAATCATTGCGAATGACAGCCAATCTGAGTGGTTCA
TGTCATTTGGTTGCCATTTATCAAGCTAGTCAACAGATTTATGATCAATTTGATAAAGCT
ATTGTGCTTTATGAAGGTCGTCAGATCTATTATGGTCCTTGTGACCAAGCCAAGCAGTAT
TTCGAGGATATGGGCTGGGAGTGCCCAAGCCGTCAAACCACTGGTGACTTTTTGACTTCG
ATCACAAACCCTTCGGAACGAAAAGCAAGACCCGGCTATGAGAACAAGGTTCCTAGAACT
CCTGAAGAATTTGAGAAATATTTCAAAGATTCGAAGATCTTTCAGAGAATGATGAGCGAA
ATGAAATCACACGAAGAGGAATTCCCAATGGGTGGCAAAACATTAGAACAATTCAAAGCA
AGCCGAAAGGGTATGCAAGCAGACCATCTAAGGCCAGAGTCACCATACACAGTCAGCATT
GTCATGCAGACAAAACTTTGTGCAAGGAGAGCAGTTCAACGTTTATGGAACGATAAAACA
TCCACCATTACCACGATAGTAGGACAGATTGCCATGGCTTTGATCATCGGATCCATTTAT
TACAATACCCCGACCAACACAGCAAGTTTCTTTCAGAAAGGAGGTGTACTTTTCTACGCG
GTATTGCTCAATGCCCTCATCGCCATTTCAGAAATTAATACTCTATACTCTCAACGACCA
ATTGTAGAGAAACAGGCATCTTACGCATTTTATCATCCTTTCACTGAAGCTTTGGCTGGT
GTTGTTGTTGATATACCGGTAAAATTCGCCATCGCTACGTGTTTCAACATTATTCTATAC
TTTCTCTCTGGCCTGAAAAGGGAAGCAGGTGCATTCTTTGTCTTTTTTCTCTTTAATTTT
GTTGCAATTTTGACGATGAGTCAAATATACCGCAGTATTGCAGCAGCAACGAAAACTATA
TCCCAAGCATTAGCCATAGCTGGTGTGGCCACACTTGCGATTGTCATCTACACAGGTTTC
GTCATTCCTAGACCACTAATGCATCCTTGGTTCAAATGGATTTCATGGATCAATCCAGTT
GCGTATGCATTTGAAGCTTTATTCGTCAATGAACTTCACGGCACAGAGTTTGTTTGTTCG
ACTTTAGTACCAACAGGTCCTGGCTATGTTCAAGCCGGCAATAACTTTGTTTGCGCTGTC
GCAGGCTCTGTTGTTGGCGCGACTACTGTCAGTGGTGATGATTATTTGCAAGCACAATTT
CAATACTCTTACTCCCACATCTGGCGTAATTTGGGATTCATGTTTGCATTCATGATTTTC
TTTTTGGCTTTTTACCTCCTTGCAACAGAGTTCAATGCATCCACAGACAGCAAGGCCGAA
GTGTTAGTCTTTCGTCGTGGGCATGTACCAACGAACTTGTTGGCCGCCGAGAAAGCTGCA
AAGAACGACGAAGAAGCACATGCCGGGAATGGTTCTGCTGTCAAGGAAGGCAACTCGGAC
AAACAAGGAGATGAAGTTCAAGCATTAGCCCCTCAAACGGACATATTCACATGGAAAGAT
GTTTGTTATGACATTAAGATCAAGAATGAACCTCGCAGGCTTCTTGATAATGTGTCCGGA
TGGGTCAAGCCTGGTACTCTAACCGCTTTGATGGGTGTTTCTGGTGCAGGAAAAACAACT
TTACTTGACGTCCTTGCCCAAAGAGTCTCCATGGGTGTAATCACAGGTGATATGTTGGTT
AGCGGCAAACCCCTCGACGCATCCTTTCAACGAAAGACCGGATACGTTCAACAACAAGAT
TTACATCTTGAAACTACAACTGTTAGAGAAGCTCTTCGATTTTCCGCCATGCTACGTCAA
CCAAAAACCGTTTCCAAGAAAGAAAAGTATGATTTTGTGGAAGAGGTTATCAAGATGTTA
AACATGGAAGAATTCTCGGAAGCAGTGGTTGGTGTTCCAGGTGAGGGATTGAATGTGGAA
CAACGAAAGTTATTGACTATTGGTGTCGAATTGGCTGCTAAACCTGCACTCTTGCTCTTC
TTGGACGAGCCTACTTCCGGTCTGGATTCACAATCTTCATGGGCAATTGTTTCTTTTTTG
AGAAAGTTAGCCGACAATGGTCAGGCGGTCTTGGCTACTATCCATCAACCTAGTGCTATT
CTATTTCAAGAATTCGATCGATTACTATTCTTAGCAAAAGGAGGAAGAACTGTTTATTTT
GGAGATATCGGTCATAACTCGGAGACTTTACTCAATTATTTTGAATCTCATGGTGCTGCC
AAATGTGGGGAGGATGAGAATCCAGCAGAATATATGTTGACAATGGTTGGTGCTGGTGCA
CAAGGAAAATCTACTCAAGATTGGCATCAAGTATGGAAAGCAAGTGATGAAGCCAAAGTT
ATCCAAACAGAAATTTCACGCATTCAACAAGAAATGGGCCATCAGCCATCTGAAGATGAT
AGTAATTCCCATGGCGAATTCGCTATGCCATTCACCGTTCAACTTCTTGAGGTTATGAAG
CGTGTATTCCAACAATACTGGCGTACTCCGGGTTATGTATACTCAAAACTTGTTCTTGGT
GTGGCATCCGCTCTCTTCATTGGATTTTCTTTCTTCCACGCCGATGCATCTCAACAAGGT
CTTCAAGATGTTATCTTTTCCATATTCATGATAACAACTATCTTTACCACCCTCGTACAA
CAGATCATGCCAAGATTCATTCTACAAAGAGATCTTTATGAGGTTCGAGAAAGACCATCA
AAATCATACAGTTGGAAAGCTTTCATTATCGCTAATATCGCCGTCGAAATTCCATATCAA
ATTATCCTTGGTATCATGGTATTTGCGTCCTACTTTTATCCGATTTATACCAAAAATGGT
ATTCCACCCTCGGGTCGCCAAGGACTTATTCTCCTCCTCATTATTCAATTCTTTGTCTTT
GCTAGCACATTCGCACATATGCTTATTTCCGCTCTCCCGGATGCTGAAACTGCTGGTAAC
GTTGCAACACTGATGTTCTCACTTACCCTTACCTTCAATGGAGTCTTTCAAACCCCAAAA
GCTCTTCCTGGATTTTGGATCTTCATGTATCGTGTTTCGCCTTTAACTTATCTTGTTTCA
GCTATCTCATCTACTGGTCTCTCCGGTCGTCAAGTAATCTGTTCCGATAACGAACTTGCA
GTTATGCAACCACCCGCTGGCGATACTTGTGGTAGCTACCTCCAGTCATATGCCACAGCA
GCTGGAGGCTCGATCTATAACCCTGAAGCTATGGCAGATTGTCAATATTGTTCCTCATCC
AATGCAGATCAATTCCTCTCTTCTGTAGCTATTAGCTATACTACTCGATGGAGGGATTAT
GGCATTGGTTTCGCATACATTTTTTTCAATATTTTTGTGGCGATTTTGTTGTACTATTTG
ATTAGAGTTAGGAAGAGCAGTGGGAAGAGTCTCAAGGAAAAGTTTGGAGCTTTGGGAGCA
CTTTTTAAGCAGAATTAG
>8fcad73f-3289-41c8-bfc3-a14fe06431b9 (mRNA) 369 residues [BFAB_07:811806-812527 - strand] [cds] name=Bfab07g02230.1
ATGGATAAAGGAATCCATGCTGAAGGAGTGGTCTCTGCGGAAGGAGGGATTATCTCGGCT
GAAGAAGAGGTCTTTGTAGAAGGAGAATTATCTGCGGAAAGACTGAAAGATCCGACTGAG
ATGATCCAGGATCAAGGAACCATGACTGGCAGCGAAGAGAGTAAGAGAGTTGAAGGAGAA
AATGCGTTGAGCGCTAATACCAAGAAGGAGGTTGAAATTCTGAAAAGAGACACGGAATCT
CTGCCCAGAAAAATGAAGTTATTAGAAGAGCAGAAGAGAGAAGTCGACAGAACTTTGTTG
GTTGCGAAAAAATTGAGCGATTACAAGATGAATCAACTAGAGAAGATTAGTTTAATGGGG
GAGCACTAA
>5f819721-6b07-44a4-a14b-e40fb3a50e91 (mRNA) 1629 residues [BFAB_07:814525-816633 - strand] [cds] name=Bfab07g02240.1
ATGACTTCTTCGGACTCAGAGATAGAAATGATTGGCATCAATGAAAACCAAACAAAATCT
CGACGAGGCACACGCTGGGTTTCTCGAAGACAACCGAAAATCAAGACTGAATCCAGAAAA
TCTGCACTCGACAAGCTCCCGCTTGAAATTAGACGTATGATCTACAAGGAGCTCTTGACA
AACCCAGTTTTAGGAACCATCGAAGCCATTGAAGCAGGCACAGAGTCTGGAGCCGAAGCC
ATTTATGGACTCAATCCCGCCATATTGCGCACATGCCGCCGCTTCTACGAAGAAGCTTCG
GAGGTCTTGTACGACCAGACATTTATCATCAAGTGCGACTACAACTATCGCGGAGGAAGT
CTGTTCCAAAGACCTGTTACGTCATGCCCTTGTCCCATATTGAGATATAGATATAACCTC
GAACCTCCAATTACTCGACTTGAGATTCCTATCAAGTCTTCCGCTATGACACAAGCCCGT
TCCTGGAAAGTTTTAGTCGATTCGTATACCGTTAAGGTTGATCACCACCAACAGTTTTAC
GAATTCTGTAGAGCAATTTGTGACGCTCGTCCTAAGGAGGTTGAAATCGTCATGTTGAAG
ACGGGAACCGGTCCTTCTAGTATAATTGAAGGTAGGCGATTGGGATCATGCCGCTTGTGG
AGACCATGGAAAACACTAGCACCACTCACCATGTTACGAAATTTCGGCAAGTTGACCATC
AGAAACGAACACGCACCCTACCTTCATGAGACTGACGGCTACATTCCGGATACAGTTGTT
TGGAATTCACATGAGCCTGGGAAAGTATTGACTCGTATGCTGAAGAATCTAGCACAAAGC
GATAGACCAGTCGAGAGAATATTCCCGATGAGAGCCAAGCTTGTGAAACTCGCGCAGAGC
TTTGAGCGATATCTTCCATTTAAGATTGACATGAATTTCCGCACTCCATTAATTACGAAT
TCGAACGATGGTCTCCGTTCTCATTCAGAGGACACGCATGATCTTATTAAGCGCGGTTAC
AAGAGATGCCTAGAGTATGATGTCCTGAACCCAAATCGCAGCAAAGACTTCAATAACGAC
CTAGAACAATCTCTAGCTATAGCCAGAGACAACGATTTGACCATGCAAAATTTGGAATTC
AAGAAGAATAGGGAAGACGTCGTCAATGAGTTGCAACTCCAGTACAAGAGATTGGTGATT
GCTTCCAATGATCTAAAAGCCTTCAAATCTGGACGAGAGGAACTTTTGGAAAGACGAGAC
TCCGCATTCGCTTACTGGTTAGTATTGATCGAAGCATATGCCGCAGAGTTTGAGCGCCAG
AAGAACCTTCAAACAAAAGCAGAATTCCGAAGACAGAAGCGTAGATTTGATAACCTCCGC
GCAACCTGGCCAAGAGAGATCATGCTCGCTAAGCTGGATCGAATGGTGGAGGATCAGGAA
TTTGGTGAATTCGCGAAGGTTGCCCAGGAAGTCGAGAATGACATGGACAAACAACTTGCA
GGAATTACAGTTGCATGGAGAGATCTTTTCAAAGCAGACGTGTACCATGAGAGATTCTGT
CAGTACAAATTCGATGTTGGAGCACTCAAGAGAAAGAGAGATTTTCGGGATGAGGATGAG
GAACAATGA
>2d95d2d4-ad0b-4f54-aa3a-0c226b67bbbc (mRNA) 819 residues [BFAB_07:820460-821615 - strand] [cds] name=Bfab07g02250.1
ATGCCGGACCCCATCACGGTTAGCGCTGCAGCTAGTGTAGCTTCGGCTCTATCTAACTCT
ATCGCTATCGCTTCATTCGTCAAAGATATCAAAAATACTCCAGCCGATGTCAAAACATGT
TTCTCTCTCACAGAGCGGGTCTCTACTGACCTTGACCATCTTATTCTTCTTCGTGCCCAA
CACCATAAATATCTTTCCCGAAGCCCATTTGCCTCCAAAAGATTAGAAGGTATCGTTAAT
GATGTGAGAGAAAGTATCTTGGACATATGCAGGCTATTGGAAGGGTGCAGAAAAGAGGTT
TATGAAGGTGGCCATATCCCGGTTAAGAAGAGGCTGCAATGGGTGCTAGGGGATGGAGCG
GCCTTTGAAAGGAGAAGAGGAAACTTGCAACAACAGCATACTGCACTTCTGGCGGAAATA
GGATGGTTAAGAGGACTTGAAGTCGGGAAGGGGACAGAGAATTTGGAGTTTGAGAATGTG
GACTTATTGAGCGCAGGAAGGAGGGAGAGGAAGAGCAGCACAGTTTCTCGGACTGAAAAG
CAGTACGAGGATATTGAAGTAAGACAGCCTAATAAAGGTGTTGAAGTGGATGTTGAGGAA
CTCGACTTTGGTGGGGATGTGGAGCCAGACTCTCCTGTGACGAAGGAAAAGATAGTCAGG
AAACCTGTGGCTATGCCTATCGGAAGTCGTCAAGAGGTCAGCAAATATGAGGAGTCTGAT
GATGAGGATCCAGAATTGGCTTTCTATAGAGATTTGAGAAGACAGGAAGAAGAACGACGT
AAGAGAATGGCTGGGAGGAAGAAGTTGAGAAATCCATGA
>c706d282-40c0-4ec9-af0d-393ce9352864 (mRNA) 1266 residues [BFAB_07:821829-823600 - strand] [cds] name=Bfab07g02260.1
ATGTCAGATTCAAGTACCTCCTCTCCCAATACTTCTGGTGCTGGTCTTGCACCGGGAACC
TCTTCTGCAGCAAGCTCTACTACGCAAACCACTACTTCAGAAACATCTTCATTAGGAATC
TCTTCCAAAACAAGCTCTACCACGTTTTCCACAGCAAGCTCTACTACCTCTTCTAATCCT
TCTGATGCTGGTCTTGCATCGGGAACCTCTTCCATAGCAAGCTCTACTGCGAAAAGCACT
ACTTTAGCAGCCTCTTCATCGTCGACCTCGACAGCGCTTCCGACCCATACTGGTCACCAT
GGCTCTTCAGTTTCTTCAGGAGCCGTCGCCGGTATCGCAATAGCTACTTTTATTGTGGGT
GCACTTCTTAGTGCCATCTGCGTTTGGTTTTATTTGAGGAGAAAAAGAGCATCGAAAACG
CCCTGGAGCTCTGAGAATGGATACAGCAAAAAGAATGCTACTACAGATCATGGCGTTGTG
ATATCTAAAAGTCCCGCGACACAAATGCAAAACTATTTAGTTGCCGAACGAGCAGATGAC
AGTCAGTTACGGCACCAAATGCAAAATCTTGGAGAATTGATCTACCAACATGTCGAAAAT
CATTATACTACAGGACCACATACTGGAAGCTCTCAGGATTTCACGGCGACGTTGAAGAAA
TGTGGATATTCGGAACGAACTGATCCTACTATCTCTACGCTTGGATCACTACTTGGCAAT
TCTAGTGAGCGACAGACAGCGATCAAGAATCTAATCGCATGGGTCATTTTGAGGGGAGTA
GAACTAAATCGTGCTTCTGAGTATTCATTGTTGCCCGATGAGATCACAACCTCTTATCAT
TCAGCTTTGAAGGATAATAAGCAACTGAACAAACAAGATGCAGCATACGATAACTTACTA
TCCCGAGTGCGACAATTATCCACACAACATATATCTTCATCAAAATCTCTAGAAGGCGCT
TCCAAAAACCCATCAATTGCAAGAGTTGTCAATCTTCTCAACTCCATACTCCAGCCTTTC
ATAAAACCCAGTAGCAAAAGTTCCCAATCCGAGAATCTCGCCTCGATCGTCTATCAAGGG
AGGGAATTCGGATTACTGTTGTTAGCACAGCCAGGAAATTGGATATTTGGTTGGGAAGCA
ACTCCGGGAGTGGAACCAAACACTAGGAATCAGATTGTTGTGTTCCCTAGTTTAGAGGAG
GTAATTAACAGAGATGGGAAAGAACGCCGAAGGGTTGTTAGTGAGCAGGAGAGGGAAACT
GTGTAA
>10591628-657c-4217-8585-c0589e8dac6c (mRNA) 1899 residues [BFAB_07:824436-827103 + strand] [cds] name=Bfab07g02270.1
ATGGCTCCCTTTAATGAGAACGCTCCAGATATCATTGTAGGGATTGATTTTGGACAGACG
TACACTGGCGTCGTATGGTCAAATTTGAGTAATACAAATCCGACCAAAAGTATTCAAGAA
TGGCCTGGATTACCTCCGGATTCAGTGGAAACAAAAGTTCCAACAACCATTGCATATTCA
CGCAATTCAAATGGGAGACAAGAAACCGTTTGGGGATTCTCATGTGATCCCGATGATGAA
TATCATGAATTTACAAAAGTACATGAGCATTTCAAGATCTACTTAGATCAACATAGTTTG
GATTTAGCTCGGAAGGGTGGTGTAAGAGATATGCCCGAAACTGTTGACGAAGCAAAATAT
CTCGTGACAGATTATTTAAACCAGATTTACAAGCACGTCAAAATTTGTATCGAAGCTATT
ACTGGGAGTTGGAAAGACAAGAGGATCGAATTTGTTTTTAGTCTCCCCACCACCTGGGAT
GCTTTGGACACGGTTAACAGATTCAACGAAGCAATTAATGCGGCAGGCTTCACATCTCAA
AATCCGGATAAGCATTCGGCGAAGTTGGAATTGACCGAAGCTGAAGCTGCAGCTGTTTAT
TTTGTGACAAATTCTGAAATTGAGCTTGAGAAAGGGGATATCATTCTCATTTGTGATGCA
GGTGGAGGAACGACAGACCTTGGTCTTGTGGAAGTAGCGGATCCAAACCCTGAAAGACCA
GCATTGAAGCAGGTGGCAGAAGTTAAAGGTGTTGGTATTGGGTCGACCATGATTGACCGA
GCATTCGAGCGTCTCGTACAGAATCGATTGGATGAGTATCCCGACATAGAACTTCCAGAT
AATCTAGCGCATAAACTAGCTAGAGGTTCGTCTTTTCAGTCCATTAAACATAACTTCGGA
ACGACTTCAGGTAATCATGCTGTATATATATTACGACTCGATAAATTGGGAATTGGAATT
GACAAAGATCTAACACACCCTGGACTCCGGATTGAAAAGGGTAGAATGCAATTCTCAAGG
TTCGAAATCCAGTCTCTGTTTGATGTGCAAATTGCTGGTATAATACGTAAAATCGACAAA
CAACTGGACTGGATGCAAACGCATCGGAGTCATGATGATGTAAAATTTCTTGTCTTAAGT
GGCGGTCTTGGAGGTTCACAATATGTAAAGACCAAGATTGAAGAATATTTCCATCGAAAT
CCTCGTCAAATAGCACATCGTATAAGAATTTTAAAATCTCAAGAGCCACGGCTCTCAGTG
GTAAAGGGATTGGTAATAGATAGAAGGCAACGAATTAAAGTTGGATCGGCGACTCTGAAA
ACTAGAGTCGCAAGAGCAAGTTACGGTGTCTTATGTCGTCAAGAATACAACCCCGCGATT
CATGTCGGAGAAACCATCATAACTGATCCTTACAACAAGAAGCAGAAATGGGCGACGATG
CAAATTGACTGGATTATCAAAAAGGATGACACTATCGAGACTGATTCTGCTCGAGACCGA
CTTTTCACGAGAAAAATTATTCCGGGAGACAACAATCGAACATGGGACACAACAATTGTA
ATTTCCCACGAAGATCGTCACAATCTGCCCACGAGTTTCAGACATTCGAATGTCTCAAAA
CTGTGCACAGTGCACTCGGATTTGAAGGAAGTCGACGAGGAAGAATTTGAACCGAAAAAC
CGAAAGCTCTGGCAACGGAAGAAATACTATCTTGCCACCTTCACCGTGCGAGTAATAATT
GCACCAGCAGATTTAAGGTTTGAACTATGGTTCAAGGGGATGAAATACAACAGAAGCCAT
GAGCCGCTATCAATAGACTGGGATCCCGCTGGAGCTTCATTGCGTCCGCGCTCAGCTGAT
AGACCGGTCGATGGATGGGAGAGCCGTGTGCAGCTGTAG
>43c3e8fc-8ff6-4f67-b60a-292f4f42f862 (mRNA) 750 residues [BFAB_07:827167-828325 - strand] [cds] name=Bfab07g02280.1
ATGAAGTACTCAATTGCTATCGCGGCTCTCGCTGCAAGCTCGGCTGTTGCAGCACCAACA
ACAAAGCTCAACGCCAAGCAGAGACTTGCTCAACGAAACAAGAATGCTGCTCGTTCTGAA
GAATATACTAAGAGCTGGGCTGGTGCCGTTCTTACTGGTGCTGTCTACACCGGTGTTTCT
GCTTCTTTTCCGATACCCAAGCCAGCGATTGGCACCACAGGAGAGACCTCAGCATCAGAC
TTCACGGCCTCTACCTGGATTGGCATTGATGGATACAATTGTAACAACCTCTGGCAAGCA
GGTGTTGATGCCACCATTGAGAAATCTACTGGTGAAATATCATACTATGCTTGGTATGAA
TGGTACCCCGCCGATACTCAAGTCATTGATTTGGGTACTCTCACAGCTGAAGATGTTATC
TCCGTAAATCTCACCACTAGTGGTCTCAACCAAGGAACCGTTGTTATGGAAAATAAATCT
ACCGGAAAATCATACACCAAAACCGTCTCCTCAGCGAATACCCTGTGCGGTGTTAGTGCT
GAGTGGATAATGGAGGATTTGAGCGTTGATTCTAGCACTATCGGTCTCGCAAACTATGGA
AGCGTTGTTTTCTCCGATGCAGTTGCTACTACTGCTTCTAAAACGGTCACACCATCTGGC
GCGGAAATACTGGATATTGAGACTAGCTCGAATATTATCCTAACCAAGTCTAGTGTCACT
GCCAAGTCGGTTACCATTGCTTATGTTTAG
>157a1602-9233-4178-b194-cfc7b3653673 (mRNA) 870 residues [BFAB_07:828897-830136 + strand] [cds] name=Bfab07g02290.1
ATGACATCCTCGTCAGCGTCCTCCTCATCTCCACCACCCGACCCTGACGACTACCTATTC
CAATCACACTACCAACCAAATCCCACACACCCGAATTCCTCTCAACCCCTAACGCCCCGA
CCACGTTCTCGACCCAGCTCTTCCTCGTCCTCCGAATCGCCCTCACCACCCCCTCTCCAA
CACAACTTCTTCGCACCCCCCTTTTACAACCGACCTCCCACACCTCTCCCCCCCTCCCCC
TCACTAACCAGTCTCCTCCGGCCCTCTCGCCCTACCACCCCTGATTCCTCGGCCGATGAG
CTCGAGCCGCCGGTCCCGCGCGCCTCCCCCAAGGTTCCAACCTACGAATACTATGGTTTC
GTACTCTACCTTTTCTCCTCTCTAACCTTCCTGCTCTACCTCCTCTGGTCCTACCTTCCA
TCTCCCTTCCTACACGCGCTAGGAATCTACTACTATCCCAACCGCTGGTGGTCTCTCGCG
TTACCGAGTTGGATTGTCATGCTCCTCGTATATATCTATGTTGCGCTCGCGAGTTACAAT
ACTGGATATCTTACTCTAGGTATGAGTAATGTGGAGACGATTATAGATGGGGCTGCGAAT
GTGTGTTTAGTTGATGGGAGGGGTATGGCGGGAGCAAGTCATGCTACTCAGGAGGAAAAT
GCTAGGGAGAAAGATAGGAGGAGAGGCAAGGAGAGGGAAAGGGGTACGGGCTATACTGGA
GGAGGGAAAGAGGCGGATGTGAGGGCGTGGAAGAAAGTTTGGAGTCGAGGTACAGATGCT
GTTATGGATGTACCATTGGGTGGTGTATGTGAAATTCTATATGGAGATGGAAGGGAAGAT
CTTGAAATGGACGATGATGACTATTATTGA
>3d5de85e-cab1-49b4-b6d4-7a9a5b419eed (mRNA) 2469 residues [BFAB_07:830224-833824 - strand] [cds] name=Bfab07g02300.1
ATGGCCTGGCAGTCTCTATCTGGTATGGGGGGTGGTGGAGGTCAGAATAATGGAGGTGGT
AATGTAGGTGATGGAGGAAACCAAGCAAATCAGCCTCAAGGAACAGAATACACACTGCAA
GGTGTTATGCGATTCTTACAAACTGAGTGGCATCGACATGAAAGGGAACGAAATGCTTGG
GAGATCGAAAGACAAGAAATGAAAAGTAGGATAGCCAAGTTAGAGGGCAATACTAGAAAA
CTCGAAGGGTCAAATGAGAGTTTGAAGAAATTCCTTACAATGTTGGAGAGAGTGGCCAAG
GATCGAGAGGCACAATTGAAAGCGATCAAATCTGGTGGCACAGCGCCGGTGCCAGCAAAT
AAAGAGACCAAGGACAAGGAGTCGCGTTCAACTCAAAGAGAGGCACACAACTCATTCCTC
GCGGTTGATGGAGAACCCGATGCGAAAAAGGCGCTTCAAGCGGAGAAAGGTAACATGAAA
GATTTTATGGATAAATCTCAAGGAGAGCTCACTTATCTTCTGGTCGCGCCACCAAATCCT
ATGCCACCACGAGAAGCCCCACCACCACCGGAGGAGATTCTGCCTTTCGGAGTTAGCCAA
GCTCAACACCAAAATCTCGAGGAAATGCAACAGCGCTACGCTGGGTCAAAAGTCATGAGA
GTACCAGAATTATCAAGAGCTCCCCCTGCGCCTTCTCCAACACCTAACCATAATCCACCA
CCAGTTCCAAGTCCCAATAAACATTCAGTACAAAATCCCGATAATTCAGCGCCAAGGTTT
TTAACAGACCAACTACCTTTACCACAACCTTCCCAGCAAGAATGGTCTTCTACATTTAGA
TCTCCTGAGAAGGCTCAACCGGCGGAAGAGCCCATTACAAAAGTCAATCATTCTTATGAC
TCCTATGGACGACCCGTTGCAACGGAAGAAGCGACAGAGAAGTCAGGTTCTTCTGATACT
GATGGATGGGATTTCAATGAACCAACTCAAACTGCAGAACAAGAAAATAAGATTGCAACT
CAGAGACCTGATACAGACGTATTTCCATCAGCGCAAGATATACCAAAATCGCCTATTCGT
GGTCCAGGCTCACATAGGAGAAAACCCTCCATGTCAAGAAGGAAAAGTGGCGAACATGAA
CTTTCATTAAATCCAACACAGAGGCCGGATAGTGGTAGTTTCAAAGTTCGATTCGGACTT
AGAGGTCACCTAGATGCAGTTCGTTCGGTAATATTTACTGGAGGTGGAAGTCCTGGAGAA
CCAGAATTATGCACAGCAGGCGACGATGGTACAATTAAAAGATGGATCATTCCCGCCCGT
TATGAAGATCAAGGTACATTCCATGTCAGTGCCAATGATTTGGATATTCAAAGTTATTTT
ACTCATCGTGGTCATGCTGGAGCTGTCATGTGCTTAACTGCTTGGTCTCCATCACAAAAC
TTTGCCAGTGGTGGACGCGCACAAGGTGACGGATGGATCTTCTCTGGTGGCCAAGACGCT
ACTGTTAGAGTATGGGAGCGAGGGCGAGTGGATCCTAAAGCGACTCTCGATGGTCATACA
GATGCAGTATGGGCAGTCTGTGTACTTCCTGGTACAACTGGATCGATCTTTGGTCAAACT
AATGCTTTTGGTGGACCAGATCGTATTATTCTAGCAAGTGGTGCTGCAGATGGCAGTGTC
AAAGTGTGGTCTGTAAGCGCACCTCCACAACTTGTATCGCCTTCAGGTGGAGGTAATCGA
AGAGGTGGCAGAGTTCGAGGTAACTCAATGTCATCTGGTTCAGCATTTCCATCATCTCCT
CAACCAAGCGTTGCTTCGACTTCGCCTTTCCATTACACATTAATACATTCGATAACTAGA
CCTAATAGCACCGCATCCCCTACTTGTATAACACCTTTAGCCACTTCAGGCGAATCTTTT
GCCGTGTCGTATTCTGACGCAGCTGTTTTGGTATACGATACAAGGACTGGTGAAGAAGTT
GCCTCTATGGCAAGTCTGGAAACATCTAATGGTACCCAATCAACAGGAGTCAATGCAATT
GTTGCAACTACTACTGGCCTTGATAGTTCCTTGAGTTCTGACTCTAATCGAGGAATGTCT
GAAGATGAGAATGTTGTTAGTGGAGCAACAGGTAGAAGTGGTGGTGTTGAAGGCATTATC
ATCAGTGGCCATGAGGACCGCTTCATTAGATTTTATGATGCTAATAGCGGCCAATGCACA
TACAACATGCTTGCTCATCCAGCAGCTATATCTGCTCTTTCACTATCCCCTGATGGACGT
GAGCTCGTCTCTGCAGGTCATGATGCCAGCCTACGATTCTGGTCTCTAGAGACACGTAGC
TGTACACAAGAGATGACAAGTCATCGACTTATGCGTGGGGAAGGTGTATGCTCAGTCGTA
TGGAGTCAAGATGGAAGATGGATCGTTAGTGGCGGAGGTGATGGCGTCGTAAAAGTTTTT
GCGCGCTAA
>70b8bf16-9774-4544-abd2-061af146287f (mRNA) 1125 residues [BFAB_07:834460-836008 - strand] [cds] name=Bfab07g02310.1
ATGGAAAGATCAAATACTCCCCCGCCTGCTAGACGAACTAGATCTCAAGTTACATCACCG
CCAACACCTGATGTTAAGAGAAGAATAGAAGAAAACAGGCTCAAGGCTAAAGCACTCCGC
GAGCAATCTATAGCTCGCGAGAAAGCATACTCTATAAATGATACCAATCGTACTCCCTCA
GGCTTCATTGCTACTCCCGACATAACCCTCGCAGGCCAAAAACGCACTCACGCCTCTATT
TCAACCTCATCAGTTCCAGCCACTTCTCGCGATGCGCGACAAACTACCAAAGATGCGCGA
GCCGATGATTCCTCACTACAAGCTGCGCGGAAGTTTCGGAAATACGTTGATCATGATTTC
AGTAAGATGACGGATACGAAAGGTGGATTCTTAGCTGTAGAGGATGATCCATGGAATAAG
GCATTACATACATCGAAAGAGGGCGAGAAACCTGCGCACATGACACTAAAGGAATGGGAA
AGACATCAGTTACTAAAAGGGTTGCGAAATAGGAAAGAGGGACCTTTTGAACCCGGCTTG
AGTGTGCTTGGAGGGGATAATAAGAAGTGTAGAGAGTGTAAAAGTTTAGAGATTGATTTT
GTGTGGGATGAGGTCTTTAAATGTAGGGTCTGTAATGGGTGTAAGGAGAAGTTTCCGGAG
AAATATAGTTTGTTAACTAAGACGGAGGCAAAGGAGGATTATCTTATTACAGATCCGGAA
TTAAAAGATGGAGAGCTGCTGCCACATCTGAATAAGCCCAATCCGCATAAATCACATTGG
CATGACATGATGTTGTTCCTACGATATCAAGTGGAGGAATATGCATTCAAGACGAAGTGG
GGGAGTGCAGAAGCATTAGATGCGGAGTTTGAAAAGAGAGAAGCAGAAAAGAAGAAGAGG
AAAGAAGAAAAGTTCAAGAGTAAATTGAAAGAATTAAAGAAGAAGACGAGAACCGAAGCA
TATAGGAGGGGTTTAGCGGGCGATGGAAAAGGTGGAAAGTTTGGAGATGCGATTAGTAAT
GGGAAACACGAACACGAATGGGGTCAAACGGTGGAGAATGAAGATGGAATGAGTGTGAAG
AGCTGTATAGAGTGCGGGATGGAGGTTGAAGAATTGGAATTTTAA
>011f685f-5330-456c-95aa-7d0090d7372d (mRNA) 579 residues [BFAB_07:836174-837278 - strand] [cds] name=Bfab07g02320.1
ATGGCTCTCAGTCCTCAAGTAACCAACTTGATCATCATCCTTGGGATGATGCAAGTCTCT
AAACGTGTTCCTCTTGAGGATCCCAACGTTTTGAATATTGTCCGTGGAATTTACATTCTA
TCAAACGTCATCATCGCGGGCGTTTACGCCTATACTCAATTCTTGATCAACAAGAAGAAG
GATATGACTACCCTCAAATACGTTGAGCAACCTCAAATGGGTTCCGCCGAAGAACCTAAG
CTCGTTACCACCACCGTCCACAAATACGACAGCGATCAAATGAAGGCTCTCTACAAGGCA
CAATTGATGGGTGTTGGAATGATGGCTGTTATGCATTTGTATTTCAAATACACCAACCCT
CTCATGATCCAATCTATTATCCCACTCAAGGGCGCATTCGAGGGTAACATGGTTAAGATT
CATCTTTTCGGACAGCCAGCCACTGGAGACTTGAAGAGACCATTCAAGGCACCAGCTGGT
TTGATGAGCAGTCTTCAAGGTGGAGCTTCCCCAACACAAGATAAGAAGTCTATTGAGGCT
GCCGAGAAGGCCGGTCGTGGAGGTGTTAAGGACGAATAG
>ca28e17f-e24b-466d-a075-c29b4a8e9d8c (mRNA) 1035 residues [BFAB_07:837600-838896 - strand] [cds] name=Bfab07g02330.1
ATGGACAACCGACAGACGTTCAATATCATCAATCCTGATCGTGGTTCACATAAACTTTAT
TATGAAAGAGGAGATTCATGCTCAATTTGGCGAAAGTGTCTACAGTATCGTCCCCGTGTC
AAGGATTTGAAAGTCTTGAACCCGTACCGTGCGAAAATACTTCAAATGCCACGTTTCCTA
CGAAAGCTGCGTTGTCGTAATCCTGGTGGTATTCCTAGCAAACAAGCATCATCATTAAGT
GACACCAGGAAGAGTTCTCAAGACCCTATCACATCCGTGAAGGGCGCGGGGACATCAAGC
GCCGGAGACCAACTCCTCGCACCAAATCCACTCTTACCTACACAGCTCTCTCCTAAGATT
CTCGACTCAGCTCCACAAAAGGTATGTGTAGAGGCTTCAAAATGCGAAATAATACTTGGG
GAGCCTGCAACAGGAAAAATTCTGTCTCCTGAATATAATGCAAACTATAATCCACATCGA
CCATACACACCATCAAACTCAAACCCAAACCACGAAATTGGTATGGCTTTAACCACAACA
CAAACAATATTGAACTATTCAAGTTCCCAACAAGCCATTCGAAACGACAACGTCCAAAAG
AGAAGCAACAGGGAAGACCATGGTAGTGTCAGATCCAATGGTAGGTCTTCTTGGGGGATT
CTGCAGATTGGAGAGGAAACGAAAGGCACCGGACTTGTAGACATATCTACATTAATATCA
CCATATCCTCAGCCGAAAAGAAAACTCGTTGCCCACAAGATTCCTGTAGATGAAGTTGAG
CAGCATCCTTTGCCGCAGTCAGCTTCGACAAAGAACTTGGTTCAATTGTTGGAGATCGAG
GCTTCTTGGCAGGAGCAGGAGCAGGAGAAGGAGGAAATGGAAAAGATAACACATCACACT
GTGAATTCACGAAAACCTAGAACACCAAGGGATTCTAGAAGGTGTGGACAAGTTTGGAAT
AGTGAGGAAACGAGGAAGAGTTTCCTTGCGATAGAAGCTCTTGATACGCTCGCTTTAGGA
TCGAGACTCACTTGA
>0d6aef8d-9ad5-41aa-afed-4429e441c6db (mRNA) 372 residues [BFAB_07:842783-843654 + strand] [cds] name=Bfab07g02345.1
ATGGTGCACGAGCTTACATTCCACATGGAGAGGAAGAATTGGATACCACGCATTAGTATG
ACGCGCAGTCCAATCAGTATGGAAAGTCTCTATAACTGCTCGCCCCGCAAAAACTGCGGG
ATGTTTCGACTCACTGCCTCTATTATATGCTATCTTCTATGCGAGGCACAGGGTGCAATT
TATCCGAAGTATTGGCCAACAGAAGATATTGACGCGTTTCTAACAAGCCACGACGACTTG
AGACACGAGGTTTTCAAGATGATCAGAGCCCAACGTAATGAGATGGCTTTCGAAGAGCAA
GTGTTCTATCCAGGATGTCGGGTTCACGAACATGAAGAGGGCCAGCCTTGTTCTCAGGGG
ACAGCTAGATGA
>7c9b003e-c9ea-4f18-b1d3-b7cc88916824 (mRNA) 924 residues [BFAB_07:843881-845583 + strand] [cds] name=Bfab07g02350.1
ATGCCTTCTCTCGAAAAAGCTCTTCCACAACCTAAGATCGAGCTATACAGTGGAAAGTAC
TTCGCAGCTTGTGGACTTGGTGGTATAATTGCCTGTGGTCCAACCCATACCGCCGTCACT
CCGCTCGATCTTGTAAAATGTCGTCGTCAAGTCGACTCCAAGCTCTATACCTCCAACCTT
AACGCCTGGTCCAAAATCTACCGTGCTGAAGGCCTTCGCGGAGTCTTCTTCGGATGGTCT
CCCACATTCGTCGGATACTGTTTCCAGGGCGGTGGAAAATACGGTTTCTATGAAGTGTTC
AAATATTTATATGGCGAGAAACTATTCCCACATGCAAATCAAACGGCAATCTTCTTGGGT
GCTAGTGCTAGTGCAGAGTTTTTGGCCGACATGGCACTTTGCCCATTTGAGGCTATCAAG
GTCAGGATGCAAACTACTTTGCCGCCTTTTGCAAACAGTTTGAGGGAGGGAATGTCAAAG
GTTATTAAAGAGGAGGGCTACGGAGGACTTTACAAGGGACTCTATCCTCTCTGGGGTCGA
CAAATTCCTTACACAATGGTGAAATTCGCAACCTTCGAAACCACCGTCAATAAAATCTAC
GCTTACTTGGGGAAGCCTAAGTCCTCTTATTCTGGTCTCCAACAAACTGGGGTTTCTTTC
CTTGGTGGTTATATCGCTGGTATTGGTTGTGCTGTTATCTCTCACCCAGCAGATGTTATG
GTCTCGAAACTTAACAGTGATAGAAAAGCTGGAGAGGGAGCTGGAAAGGCTATGACGAGA
ATCTACGGAAACATTGGATTTGGAGGTCTTTGGAATGGTCTGCCTGTCAGAATTGTAATG
ATTGGAACTTTGACAGCATTCCAATGGTTGGTTTATGATAGTTTCAAGGTGGCATTGGGG
TTGCCCACTACAGGAGGACATTAG
>d242d040-e9e9-4ff4-a6ae-a60549e1b4e4 (mRNA) 1359 residues [BFAB_07:849319-851213 + strand] [cds] name=Bfab07g02360.1
ATGGTCAGATCGACAAGCATCATAGCTGCGATGCTCAGCCCCGTCAGCCAGGCAATTGGT
ATTATCCTCTTCATGGCTGCGATACTCAGCGCCGTTAACCAGGGAACCGGCTCTACCCTC
TTCAGATATTTCAATCCTCCAGGTCATTTATGGAACTCTTCACGCGCTTCTTTTACTAAA
GAGGAGTTATTATCGTACCAAGGTCGTCGTCAATCTTGGGCTATCTTGCTATTCTTATTT
GCATTTAGTATGAGTTTCATGCCATTTGTGTTGAGAATCTGGGATGGAAGACGCAACAAA
ACCGAGCATGAAGTTACCTTGCAAGCGGAGACGAAAGAAGACACAAAAGCGAAAACAAAA
ACTACCAAATTGACCACATCTATCAAGTCCTCTAAAGTTACGAAAGCAGAAAGCGAGACG
AGCGAAGCTAAAGAAGCGAGATCCACAAAAATCGAACCTTCTGAGAAATTGACGCAAGGG
GACCAATACGATAATTTTAGCACACTTTTCAAAATGCACGTGGAAATTGCCAAAACTAAA
AGCGCATTGGAAAGCGAGCAGGAACGAGTAAACCGTATGGAACTAGTTATGGAGTCGCTC
CAGTCACAAATTGATGTCCTACAAGCCAAATCGACAGTTAAAGACGGAGGAGCTAAAAAT
AGAGCACAGGCGATTGAGGAGGATCGCCAAAGACAAACTGATATCTTGACAACAAGAATC
ATGACCCAAGAAGCAAAAATGGAAGAGGTTTTAGAGAGATTAGAAGAAAATGATCGTAGT
CATGATGCAATCGATGTGTGTATTGAAAAATTCACAAACGAAGCAGTAAAGACAAAAGAG
GAGCTTAAGAGATTTGATTGCCTTGATAACAAGATAAATGAGGTGGAAGACCTCTTGGTA
GATGAAATCAGTAATCTTGAGGAAGCAGCCAAAGATAATCTCGAGGAGTTCAGGGCAGAT
ATACTGAGCTTGGAGAATTATTTGGCGGGGGGGTTTCAAAATTTGGAAGATAAGAAGCAT
AGTAGAGAATCCGAGATTAGAAAGGATATTAAGAATGGAGTGAAAGAGGAATTGAGAAGA
GAACAAGAGAAAAGGGAGCTTGATGAGTTTTGGGAAGAGAGATTGAAAAATGTGGGGTCT
AATATGGAAGAGGTGGCAATAAATGAAGAAGTTCAAGATGAGATGAAGGAGGAAGTCATA
AATACTGTCCCTACAGTAGACCGCTCCTCGCAAACAGAAGCTGAGACTACAGAGACGGGA
ATCAACCAAGAGATTGTAGGAACCAAGGGTGGAGATAAGAAACGCGAAACCGATCCATTG
GCCGAAATTGAGACTAAAGAGACGAAATCCAAACAATAA
>ce31c343-a3b6-4731-acf3-b30cd900e557 (mRNA) 855 residues [BFAB_07:852141-853464 - strand] [cds] name=Bfab07g02370.1
ATGTCAACTCCAGAAATCCCTATCATCAAAGTGTTATTCACACTTCATGCTGGCATGGAT
GCTTTGGATTTCATCGGTCCCCTTGAAGTCCTCAGCCGTGCTCAGCATGATGTCAATGAT
CCAAAATCCAAGGCATTCGATTGCAAGTTCGTTGCTGCCGAGGAATTTACTATCTCCAAC
CAAGGAGCTGCATTCCGTGCTCACTTCAATTACAAAGATGCCTATGCCACTCTTTCACAA
TACGACATCCTCATCGTTCCAGGTGGTGGATCTGATCAAGTCCTCAAGAACAAAGCTGAA
CCGCTTGGTCTCGTCAGAGCTTTCTCTGATTTGCAGAAGAAACATCCTGAGAAGGAACGC
ACACTTCTCTCCATCTGCACTGGTTCTCTCTTCCTTGCTCAACAAGGTATCCTTCACGGC
CTTTCGGCTACCACCCACCCAGACTACTTTGCCAAATTCGAGAATATCAATAGTGAAGCC
GCACAAAGAGACTTAGCAGAACGTTGTGATGTTGTTGAGGAAAGATACGTGGTGAATAAT
CTTCGATTTGACATTGATTCCCCAGAAGAGAGTCAATATGTTCGTCGCAAGTCTGATGCT
AGACGTCCATCAAATGCTCGTAAGGGTTCCAATGCTTGGAAGGAATCAAACATTCGTCGT
GAAAGTAATGCTCGCAGAGCTTCTTTACGTCTTGGTGGTCTTCGAGTCATCACCACTGGA
GCCATTACCTGTGGACTTGATGCTAGTTTGTATCTTGTCAGCGTTATGGTCAATGAAGAG
ACTGCTGGTGAGATTGCTAAGTTTATGGAGTATGAATGGAAGAAGGGTATTGTTGTTGAT
GGAATTGACATCTAA
>b20bc1f9-c3d1-41d4-8872-f2d6b5045c27 (mRNA) 618 residues [BFAB_07:859615-860406 + strand] [cds] name=Bfab07g02400.1
ATGGGAATTTTTGATAAGAAAAAGGTTGAACACAAAGAGTCCCTCGGGGCCGCCCAAGCC
ATCAAGATATCCAGACCTATAAAAGCTGAGAATTCAATGATGTTTCATGAAGAATCAAAT
ACCAGCAATCCTACTCAACAACACGCTCGCAATCCTGACGCCCCACTTAACGATACAGGT
TATTCATCAACACCCGATCACTCTACCGGCCATGGCCATCCTAACAGGGCACCTCAAGAC
CCTTCCAGATCAGTCCCCAACAATCCCCACCAAGCAAGCCAAGCTTCTTCATACCCAGTA
GATCACCAGCAGCCGGCTATGAACCACAACCCAGCTACCAATAACCCCAGGCCCATTCGA
TCTAGCGCTACCGGTAGGCCCAGAGGCCAGAATCATACTCGCCCCACCAGACGCAATGCT
GGAAATTCCAGTTCATCCAGACTTTCCTCGGCTCATTCTGGAGCCTCTTCTGCTAATGGT
CCCCTAGATGACACGGAAGTCACCTCCCAACGTGGCTCTCGTGCCTCTAGCGGTAGTCGT
CACTCCTCCCCTCCGTCGTCTTCTGATGAAAATCCTTTCAAATATGATGACGGTAGGTAC
GCCAGTGTGTTAAAATAG
>dcfd9371-a8a3-41ef-8f2b-aa8fb98f6e09 (mRNA) 381 residues [BFAB_07:861487-862293 + strand] [cds] name=Bfab07g02405.1
ATGGAAGACCCAGCAACAGCACAGTGGAACATCCGCATCAGCTCCTCCGACTTAATCAAA
CTCAAAGCCGGTTACGAGGCGCCAGATATGAATCACAGATGGGAAATCACCCCTAAGGAA
GCCGATGAGAATGGAATCATATATATCCACATCAGTCGCAGCTGGACTGGAGAAGACCAT
TTTATACTTTCTATAAAACAGAGTGCTGAGGATGGTGCGGAGATCACGTCGATCACGTGG
GATCAGATTGTGGGGGAATATCGGAGGGATGAGGAATTTGCAAAGAAGGAGGTGGTGATG
GTTTGTAGGATGATGGTTAATTGCGAGTTTGAGGCGCTGCCGATTTATGATCCGAGGGTT
TTGTGGTCTCTGAGGAGATAG
>5a8258ce-a852-4534-a676-26f8daa4bf27 (mRNA) 1671 residues [BFAB_07:877281-881354 + strand] [cds] name=Bfab07g02410.1
ATGGAGTCTTCACCCATAGCTGCAATGCAGCCTTCATCATTCATGCCAGCTTGGGCCAGA
AATGATATGTATGCCTCGCACCCGCACGCACACATGTCAAACGTCACTGCAAATTCTTTC
GGTCCCGGTGCTTTCGACTTTCGGGATTTGAGCATGAAGCATTCTGCCAAAGCAGATTAC
TTCTTGGTTAAACCTGTTCGTGGTTCTTCACCTACAGCAAGCTTGGCGGCAGATCTATCT
CAAAACTTTCACATTGACATGAGCCCCCAATTGCCAACTCCTCGTCGATCTCTCTTCACA
TCGAATCTGTTTGGGACATTGGATGGTAGGGATTGTGCTACTACTCCTCCTTTACCTTCC
TCTTCACCAGGTCCATTGAACGAAAGAATGGATATATCCCCTCTTCCACATAAGCAACCA
TATTTCTCTGCGCAAATTGAGATGGCTTCACCTACACCAGCAGGTACACCAGTGGAAGAT
ACAGCTATGGGTTCATCTCCAATTCGTTCCAATTCATTGGACGCCTCAAAACCTTTTGGT
GCTGAGAGACGCAAAAATGGATTATTACGACCATCCCTCTCACGTACCAAGGGTTTCTCG
ACGACTGCCCTCCCTCGACAAAACGCCGATAGTCAATTGCCTCCCTTCCGCTTCGGTGCT
GGAAGCAGCAAGTTGTCTACCTCCACATCAATGTCTTTGAGCGAATGTTTCATGGAATCA
CCACCAAGAGAGCGTCCCGAACGTCCTTCGGCTGGAATGATGGGACCACCACCTCGATTG
AGCAGACCGTTCTCAAGTGTGTCGAGCAGAGTTGTCAATGGATCACCAATTGGTAGCCAT
TCCCGCAGAACTTCCAATCCGTTAGTTCGGCCTAGGAAACAATTTCGACGATCCCTCAGC
ATGTTTGAAAGCCCACAAGATATTGTCAAAGAAAAGGGAGCTGCGCCGAGCAACTTGGAA
ACCGTCATGGATATTGATGAAATACACCAACCAATCTTACCACACTTTTTCCAAGAAGGT
CAACCTGATAGCATTCCTAGAATTGCCAAGGAGACTTTATTGGAAATTCTTGATGGGAAA
TATGATGATGAATATGACCAACGAATGATTGTTGACTGCAGATTCGAGTATGAATTCGAG
GGTGGACATATCGATGGTGCTGTCAACTATAATGACAAAGAATTATTGACCAGTCAATTG
TTTGAAGAAAATATTCCAGGCAAAACCCTCCTAATCTTTCATTGCGAATACTCTGCACAC
CGAGCACCTATAATGGCTCGTCACGTACGACAGCAAGATCGTACTACTAACGTCGAGCAA
TACCCAAAGCTTTCCTACCCTGAAGTGTATATCCTGGATGGTGGTTACAGTGCTTTCTTT
ACAGAACATCAAGGCCGCTGCTTTCCCCAGAATTACGTTGAAATGGATGCTAAGGAACAT
GCTTACACATGTGAGCGAGAAATGGGAAGACTTCGACAAAATAGAACCAAGCTCAGCAGA
GCACACACTTATGCCATTGGCCAACACGGACAAATTGATGATAGCCCTACTGCACCCAGT
CGATCAAAATCGAGTGGCAGTATGTTAACGACAGAAATGACGAGTTCCCCTATGATGAGC
TCTCCTATATTTTACGACCGAGGTACCCCACGAAGACAAGTCTCATACTAA
>44d46e29-6ad0-4b73-b6ec-17e72dc9114e (mRNA) 1665 residues [BFAB_07:884955-887813 - strand] [cds] name=Bfab07g02420.1
ATGTTGGAAGCCCAAGAGCATGGACACACGCGAATGGCTGGATCTGAGGAAACGTTGTAT
GGTTCAAATAAATCGCATACGTACTCTGTAGAACGAGTTCCTACTGGTAGCACTCATAAG
AGTAATGTTAGCAGTTACAAGTTTGAAGATCCATCAAATCTCTCAGACATAGCTCTGGTT
AATTACCCAAAAACGGATGTTGGACTGAACGATATTCCCGCACATACCAAACCCAGTGAT
GCACTGGCACCAGAAACCGATTTAAATGCAGGCATTATTGGTTGGGATGGCCAGGACGAC
CCAGATAACCCTCAAAACTTTCCTCCAAGCCGGAAATGGCTTCTTCTCGGACTCATATCA
AGCATAACTGTTGTCAGCCCTCTAGCATCTTCTATGGTTGCTCCTGGTGTGCCTTATATC
GAAGAAACATTCAACAATCACAATGAAACACTGAGTACATTTACTGTTACAGTCTTTCTT
CTAGGCATTGTCTTTGGACCTCTTTTCTTATCACCATTATCAGAGATTTATGGAAGGCGA
CCTGTACTGTGTGCATCCAATATCGTCTTTTGTCTCTTTCAAATAGGTTGCGCTCTTGCT
CCGAATCTGACCGCACTCATAATATTTCGTTTCTTTGCAGGCATTGGCGGTTCCGGATGT
TTGGCACTTGGCGGTGGTGTGATAGCTGATCTTTTTCGACGCGAGCAACGTGGAGCGGCT
TCGGCAGCTTACACTATCGGTCCTTTGTTTGGACCTGTGATAGGACCTATCTGTGGAGGC
TTCATAGCCGAAAGAGTTGGCTGGCATTGGATTTTCTGGGCTATATTCTGTGCTGGCACA
GTAACAACAATTGGCATTGAAATATTTAATCGCGAGACTTATCCTCCTGTTTTAATCCGA
AGAAAGACGCAAAAACTTCGATTAGAGCTTAACCGTCCAGATCTATTATCCTGTTATGAT
TTAGGAGGCGATCCTAGTACCAGAACAGTTCTTCTCAATGGCCTTCTTCGACCACTCAAG
ATGTTATTCATGTCACCAATCGTTTTCATACTTTCGATATATATTTGTTTTGCATACAGC
TTACTGTACTTGTTGTTTACTACAATCACTCCAGTATTTCAAGAGCAATACGGATGGAGT
GTTGGACTTTGTGGTCTTGCATACATTGGTATTGGCATTGGATTCTTCTCAGGTCTTGCT
CTCGTGACGAAAATATCCGACAGGACAGTTATACGGATGACCGCCGCAAATAACGGTATC
TTCGAGCCGGAAATGCGTCTACCAGCCTGTCTTTTCTTTTCGTTATTCATCCCCATCACG
TTTTTTTGGTATGGATGGTCGGCCGAAAAACACGCTCATTGGATTATACCAGTTATCGGG
CTGATTCCCTTCGGGTTTGGGATGATGGGTGTTTTTATTCCTATTCAGACATATATTATT
GATAGCTTTCCTCTTTTTGCAGCTAGTGCAACAGCCGCTATGACGGCTAGCAGGAGTCTT
TTCGGCGCTGTTTTACCATTGGCTGCGCCAAGTATTTATGCAAAATTAGGATTAGGATGG
GGAAATACTATGTTGGGGTTCATAGCTGTAGCGATGATTCCAGCAACAGGTTTGATTTAT
AAGTATGGAGGACAGATTAGAAAGAGGTATCCGCTTAATCTCTGA
>b45eab1f-70ea-4a21-8d3a-325a667a0649 (mRNA) 1023 residues [BFAB_07:888132-889750 + strand] [cds] name=Bfab07g02430.1
ATGGCCAAAAAATCGAAGAACTCTATTCCGAACCCACCTCGAAGTATTTCTGACGACTCC
AGCCATGACGATGGAGCTCCCATTTATACACCACCCGAAACTGAGTCTAACGATGGTCCT
TCAACCTCAGCTCATGTTCCGGACGCAAACCATCTCCACGATGTAGTTACAGGACTTCAA
AATATCAACCTTGCGCAAGATAAAGCTGGTCAGCTGGAGCAAGAGTCAGACAAGGATATC
TCTACGAGTACAAGGAAGAAGCGCGGACTTCGAATTCGGCTTTCAGGCAAAAAACTAGTT
CCCGCAGATATCGCTGCCAGTAATGTCACTGTTTCCCTCCAGAACCTTGCAGTTTCCGAC
AAAGATACAAGCAATTTGGAGCTAGAGAAGATCGACCAAAAGGCTGCAAAGAGCAGAATG
AGGAAGGAGAGGAGACGCAAGGCTCGACAGGCTGAAGAGGAAGAGAAAACCCAAAGTGAA
CAATCCAACTACAAATGGTTCAAAAACGCGGGATGGAAAGACATGAAAGATTTCATGATA
GGTCATGGTTTTAAATGGGGCGACGTTGATGATTATGCTGCGGCAAGTGAGTTGATTAAG
AGACTCAAGGAGGATCAAGGTTCCGAGGAACATGCCGAACCAGAACCACCAAAGAAAGAA
GTAATCAAGGATGCTTCAGTCAAGGCAAAGATTGCCAAGACCAAGAAGAATACTGTAGCC
GGCTTGTGGGCAGATTACTTCGGGAATGAAACTCAGCTTGCAAACTGGCAAAGACTTTGC
GTCGATGTTGGCATGGAAGAGATACCTACTAGTATCACCAAGTGTCGCAAGGCTTTAGGA
AAAGTCTGGGTTAACATCTACGATTTCCTCGATGCCAAAGCTGAAGGCAAACCAATTAAG
AAGTACTCTAGCGAACGTGAGCTTGCTAAATATACAATGAAATCTGGCAAGATTTATCCA
AAGGCCAAGGCCAAGGAAGGCGGTCCTGCTAGAGCTCTGTTGGCGCACATTTTCGGACAC
TAG
>5b12edc6-46c5-45f4-9042-cf29b3618d5c (mRNA) 1767 residues [BFAB_07:890900-892944 - strand] [cds] name=Bfab07g02450.1
ATGCCTCCCTTACGGTCAAAAAAGTCTGCCAATGGTAGTGCAAAATCAAAAAAGGATGCG
CGGGCAATTCCTCAAGAAAGTGAGGAGAGTGCCAGTGACAACGAGAGTGTGAACATGATG
GATAAGGATTCCGATGAAGAGGAATTAGACAGACTTGTTCTGGGAGATGGTGCAGGATTT
ACGGCTCAATTGGGTCAAGATATGGATTTTGAATCGGAAGATAATGAGGAAGGAGAAAAA
GGTCAAGACGAGGAACGAGAGGATATTGGAATTGAGGGTGTTGACGATGCAGATCTATTT
TTCCTCGACTCTGGACCATCCACAGTGCCTCAAGATGCATTAATACCACATCCACAATCT
GAAGACGAAGAAGGTGGAGATGCGCTAGCTTGGGAAGATAGCGACGATGATCGATTGAAT
GTATCTCTAGCCGGAAATTCTCGATTAAGAAAACTTAGAGTCAATGAAGGAGAAGATATA
GTCAGTGGAAAAGAGTACACGCGGCGACTACGAATGCAATTTGAGCGTCTCAATCCTGTT
CCAGAGTGGGCGCAATCTTCTAGACCGACGAAACGACGTCGCAGATCATCTGCAGCCTCC
GATTCTTCATTGTCTTCGAACGATATGGACGTTGACGATTCCGACCTTTCCACATTACCC
CTCGCAAGACTTCTTCAAGACGCTGGAGCTCTCACAAAAGAAGCTCCCGCAACCTCAAAA
AGACCAAAACTTCGACCTGAAGTTCTCGATATTCAAAGAACGAGGGATATACCCAAAACT
CAACCATCAGCCGTCACTTCTCTTTCTTTCCATCCAGAATACCCAGTCATACTTTCTTCA
GGTCCATCATCGACTTTATATCTACATCACTATGCGCCTACAGCTCATCCACAACCGCAT
CCACAACTTACTAGTGTTCACGTTAGGAAAACCCCAATTGCTACATCCGCATTCCTTCAT
CCTTCTGGAGACAAAATCATTTTCGCTGGTCGACGCCGTTATTTCCATATCTGGGATCTT
CCTTCTGGAGAGATCAACAAGGTTACGCGAATTTATGGTCATAAGGATGATCAAAAGACT
ATGGAAAGGTTCAAGCTCAGTCCTTGTGGCCGATATATGGGATTGATTGGTTCATCGAAG
AAGGGAGGCGGTCTTATAAATATTCTTGATGCAACTACAACACAATGGATTGCGTCAGCA
CGAATTGAAGGCAAAAATGGTGTTGCTGATTTCGCCTGGTGGAGAAATGGAGAAGGATTA
ACTGTTGTAGGAAAGGGTGGAGAAGTAGGAGAATGGAGTATGGAAACTGGATCTTTTGTC
GCTCGTTGGAATGATGATGGTTCTATCGGTGCTACTGTCCTCACACTCGGTGGACCAAAT
GGACCCAAACAACTGGGTGGAGATCGTTGGGTAGTGATTGGATCTCAAAGTGGTGTGGTT
AATATTTACGATCGCAAGAATTTCATCTCAGGAAACGATATAAAAATCCCCGAGAGACCT
GAGCCAAATAGACGACTTTTGCAATTAACGACACCTACAAGTCATTTGAAAATTAGTCCC
GATGGACAATTGTTGGTCTTCAGCAGTAGGTGGAAGAAAGACGCTTTGAGACTGGTACAT
CTACCTAGTTGTACAGTATATAAGAATTGGCCAACATCGAATACGCCATTAGGAAGAATT
TCATCCGTGGCATTTGGTAGTGGAAGTAATGTTTTGGCGGTTGGTAATGAAGCTGGAAAG
ATTAAGTTGTGGGAAATTAGAAGTTAG
>02c96858-7bbf-4231-9f31-c1f5ae2e4e43 (mRNA) 1107 residues [BFAB_07:894037-895379 + strand] [cds] name=Bfab07g02460.1
ATGGCCGGCATCCTGACTAGCGAAGAAATGGCTGAACGCGCCTCAGCCCGACAATATCTC
GAGCGACCATGGCGCAACCTCGACTTTTGCGTCTACCGCTTCATTCCCCCAACTGATAAA
CGTGGACTTCCCTATGCAGAAATAAACATAGATGGTCGACCACGAGGACTCAATGCCAAC
AAAGTCTGGGTCGGAGATTTCGCTCCTCGCTGGGGAGAATTTCTTCTCGATCTAGGCGAA
CCCGTTTATGATATACAAAATCATCACCCTCTAGTAACACGGCTTGAGGGATACGGACTC
GATCAGGGACGTGTTAAAAATAGAAATCTACAACAATTGCCTTTTCCATGGGGCATCGAT
GGCTCACTTCCCGTACAAATATGGGCCAATGAACGATTTCGCGATAATCATCGCTTACCC
TTCGATCCCAAGGGAATGAGTCGTCTAGACCTGCAATGGGAAGCCCGACGACGCGGTCTT
CCCACCAAAGGAAAACGCTCCGAAATAATCCAACGAATCAACCGCCTCGAATTAGCAAAA
GGTATCCAAGCCCCTGATTTCTACCAACGCGAAGCCCTGCAGCGTCTCGATGCCTGCCAA
ATCCCTCTCTTCCGCGTTCTCGAACCCCAGGAACCAGTAAAATCTACACCGCAAACCCCC
TTGAAACAACCTCCTTTCGACACGGGCGAGATCGTGCTCGTCTACGGCACCCTAACCGGC
GACGACACCACGTGTCTCGTGCGCGACTACGAAGGGAACCGCGGACATATCAGTTTTGAT
TATCTCGAGGAAATCCCATTGCCGTTTGGACTCAAGCTGAACCGACGCGAATTGGTCGAG
GTGCTCGATAGATTGGGCTGGGCGGATGAAGTGGACAAGACGCCTGAGCCGGAGGAGGGC
AGCGATGAGTGGAAGGCGTTGGTGGAGCAGAGACGTGCGGAAGCGGAAAAGGCGGGGGCA
GAGGAAAAGTGGCATGATTATGATACAAGGTGGAAGGAGGGGCAGAAGAGGAAGAAGAGG
GCTGACGATGCGAAGAAGGCGGAGAGGAGAGCGAAGAGAGCGAAATTGGCAGCGGCAGCA
GCGGCGGCGGAGGGCGCGGAGACTTAG
>04aba4aa-5a14-4e3c-9d64-1f825cb603a3 (mRNA) 2502 residues [BFAB_07:895467-898348 - strand] [cds] name=Bfab07g02470.1
ATGCACCCGACCAAGCTTCCCCAAAGAAGAGCTACCCATGCCTCAACTTACCCAATGCCT
CCACCCGGCCTCCCAAATGGCAGTCTCACACCTCTACCCACAACACCGTCTCCAGAATCA
GCTCAATCATCCATTCACAATGCCTCCTCCCTAGCCTCTATCCAAAACATACTCTCAACC
CTCCATACCCGCGACGCAGCGATCACTACTAGTCTCCAATCCCTCATCTCTTCTCAAGCC
TCCCTCTCCCGCGATCTCGGCCGACTCGATCTATTACGCGCGCATCTTGGCACAAATGTT
ATACATACTAGGGCGATCTCAAATGGAATGCTTGATAATGCCGCCGGCACGGCCGAGAAG
CTGAGCTCAAAAGTAAAAGAATTGGATTTGGAGAAGAAACGAGTTGAGGAAACATTGGGC
GTTGTAGAAAAAGTCGCGGAATTGAAAGCATGTGTGAATGGCGTGGTGGGTAGTATGGGG
GCTCCGCAAGACTGGGAAGCTGCAGCGGGATATATTGCAAGAGCGTCGAAGATCCCGGCA
CATATTGTCGAAGGCAATTTTGCGGCAAGAACGGTTCCAAGTGTTGAGGTACCGGATGCG
CCAGGCGTGACGATTGAGGAGGCGAAGAAAAGCTTGTGCGGATTGTTTTTGAGAGAGTTT
[truncated: 18,520,620 more chars]
