# Supplementary material for: Genome Comparisons between Botrytis fabae and the Closely Related Gray Mold Fungus Botrytis cinerea Reveal Possible Explanations for Their Contrasting Host Ranges
Source: J Fungi (Basel). 2024 Mar 14;10(3):216. doi: 10.3390/jof10030216 (PMC10971195; doi:10.3390/jof10030216)
Supplement: Supplementary file 1 [file jof-10-00216-s001.zip › BfabG12_mRNAs.txt]

>4361325e-5b89-4a03-816b-d788dda0b9c5 (mRNA) 2008 residues [Bfab07:18203-20210 - strand] [genomic] name=Bfab07g00040.1
ATGCATCTACTGACCGACTTTATATACCAGCTGGTTGATTCATTGATTATAAGTGTTACT
GATTTGTTCAGATGAGAAGTTTCTCATTTCATCCATTTAGAGATCATTTCTGGATTTCAC
TCACGTGTTCCGAGGCATGAGTATCATATAGGCAATCTTTGTGCGAGATACGACGTCAAA
AAGAGTTTTCAATCGAAGGTTTTCTCGTTCAGTTCTCCACTCAAAAGCTTTGGTGGATGA
AAGTTGCGGACTCGATGGTCAGTCCCTCATTCTGTTTAGAAACTCTAATAATTCGCTTTG
AAGAGGAAGATAAATACATGATTTTCGATTTGATTTCGATCATTATTTGTTCAGACTTCG
ACATTTCTTACACATTTATTAATCACTCTATCCAAGGTATATACCCTTTCCCATGCTCCG
TCCCAGACATCTTCATACTAATGTTCATGTAATTCAACAGTTTCCTATTTCATCAAAGCA
AGCATCAAATATGAATCCTCTTCCACACAATCAATCAAGTCTTGAATGTGGTATTCGGAA
GATTATCGCGACTGGAACCATTCCCGCCCCGAACGCGTATTGGCAACCAAATTTCACCAC
ATCAATAACCCCGATTAACTGTTGGTCTCACAACGACGAACATCAACAAATCCCTCTCTA
TACCGCTCTTGCCGCTGGCTGTATAGCAATTGAAGCGGATTGCTTCATTCCTTCCTACTA
CAGTTCCTCTCGCTTTCTCACCTCATTACTCTCATATTTTACATCTTCGTCAAAACTTGT
AGTGTCCGAAAATGATCTCCTCGTAGGTCATGAAACATCAGAGCTTAATCCTGCAAAAAC
ACTCTCTAGTCTTTATTTAGACCCACTTCTGGAGATTTTGACCCAACAGAACAAAGCTGC
AGGAAATCCAGAAAAGAAAGTAGGAGTTTGGAATGAAAATCCACATCTATCGTTACATTT
GACAGTCGATTATAAAAGCATCTCCTCTGGACATGATGGAATATCCATCCTCTATTCTCT
TCTCGAGCCTCTTCGAACTGCGGGTTTCCTAACTCACTATGACTCGGCTACCGAGAAGCT
GATTTCTGGTCCCATAACCATCGTTGGAACTGGCGATGCCGACTTTGAATTGATATGCGG
CTATGAAAGCATATATATCTTTAAAGATGCTCGATTCTTCAATTTCCTGTCTTCTCAAAA
TCCATTTAATTCATTATACGTCTCGGGTAACATTTCTAAATCTATTGGTCGATTTTCAAA
ATCCAAAGGACCTACAAAGAAGCAAGTCAGAATAATAAGGAATGAGTGTAAAGAAGTGAG
AGAGAGAGGACTGATACCCAGATATTGGGGAGCTCCTGATAGCGAGGATTGGTGGCGAAT
ATTGGTTGAGAGTGGAGTTGAGGTATTGAGCTGCGATGATCTTGATCGTGGAGGAGAGTG
GTTAAGGGGCTGTATTATTAACGGGGTAGGAGTAGGAGCTTCATGGAAAGATGATATCAA
AGAGAGTGATGTGGAAGGTTGGGACGAGGGATTGTTTGGAAGATGTATAGTCTCGTGAAA
GACGAACTAAAGAGATGAAATTAGTTGACTACTTGAAAAGTATCACGATCGCATACTAGA
GTATATCAATAGAGGCCAAATAACTAGAATAAGAAAACTGAAGAGTAAAGAGATCTTAAA
GGGATCCCTTTATCTTGAAGTTCTAAGACTATTTACTGCTCGTTCAATCCTGGGAGGATC
AGATACACTGTGCTGTGGAATGTTCCAGTCGGGATCGAGCATCCGTTGGTCTATACCCAC
TCTGAAGATGTTCAAACAAGAGAGACTTCTATCAGAATCCTAACTATTATTCTAAGGATT
TTTTTAATGATCACTACTAGTAATACTCATTTTTAATAGGAAGATAGTGTTTCATCAAAA
AGTCACCAATTGATCACTACCCTTTTTGATTTCAATTTAAATCTTTTTGAAAATTTAAAA
AAAGAAATCAATAGAAACTCAATTGAAT
>66a144fa-907c-4eb2-8f61-99d10b82f3c5 (mRNA) 2928 residues [Bfab07:20923-23850 - strand] [genomic] name=Bfab07g00050.1
CAATTGATCTTCTATCTTCTTTAAAACAAATTCCTCATCCAATTTGACGCGTATCAACAG
AGAAGTTCAATCCATCATTGGGCATATATTGGCTTGGAATCATGCACAGAGCTGTCGACC
TTTGACTGCAGCCTATATTCCTTGCACGTCAAGACTAATTCTACAATTAAATGAAGTTGG
AATGACATTGGAAGTCATGTTTCTATCTTGCTTACGCACTTGACTACGACGACAGACATT
GCATCTCTCTGATTCTCAATCTCTTTTCATTGCGCTTACGCCAGATATCGCTTACATTCA
AGTGAATTGATCAGCTCAGTCGAGTCTTCTCTTACGAATTTTCATTCTCAACTTTAAGAT
TGGCGTTGATCATTCGCGGCAGCAATGTCTTACTCCGATAATATATCTAATGCGGAAAAC
AATCCAATAGACAAGTGGAATGAAGATAATAGTGATGAGCTCAGTCCAACCGATGGTTAT
TTCAATTCGAATCAAATCCCTCAAAATATGATACCGGACCCTACACTCTCACAAGAGGAG
GATAAATCGAAAGCTCAAGATGCCAAGGGGAATCTTCCAAGGGGTGGTAATATCCCTTCA
ACTCTGCAGATTTCGTCGCACACCAATGCGTCATCTCATGTAATTGAGCACCCTCGACAT
TCTCAAACCTCGTCTAATTCTCTTCTTGCTTCGTCATATCACAGAATAGATAATTCTTTC
CCTGAAAATCAATCCTTCTTGGACCAACCTCCCCCAGCTTATATAGCTTCGTTAGAGTCT
TCGCCTGTCTCAGCACAAGGGCAGCACACTCTCATGCACTACAATACTTTCTCACAAGAT
CGCCTCGAAGAAGGTCTACCAAGAGAGCCTCAGAGTATGGGAGGACCAGCAGGTAATCAG
GACATCGATGAAAGAATACCTCTTTTGCTTGACCGAACACCCAAAAATATTTCCTTTCGA
CGAGACATTATAACAAAAGCTCTTGGACTGGGATTGGCTCTAACCATTGCTGCCGTTATA
ATAGGTGCGATTCTCACAGAAAAATCAGTAAGTTTACGCTTCCACCGAGTCGAGACTATC
TTACACGCCACGTACATTCTTTTGTAGCTCTACAACTGTTTTTCTATATCATGTAGACAA
ACCATCTAATCCTAGGGCTGATCAGTATGCAAGAATCCAGATTCAAACATGGGAGAAGGG
CCTGCATTTCCCGACCCCATCCATGATGGTGGCTCATATTGTCAACATATATCCAAATCG
GACCAAACCACATTCGAAATCATTGATGCAGCCGGAATTGTAGTAATACAAGATTTCTAC
CAACACAACTCTGCTCATTATGGTCCGGAGGTCAAAACAGCAGGAGAAGTTCACATTCGA
AATCTACCAAACAATTCAACAGGTGGAAAAGCACATTTTACAGTTGAAGTTAAACTTAGC
CACCCGGAATTGTCTGTGCTAAAGACTTTGAACGAGCTTGATGGTTCATTGAAAATCAGC
ACGCCGAGATTTGCCAACCTAGGTATACATGAAAACCCTTGTATCTCTCTTGAGATTACG
GCTTGGATACCAAAAAATGCAGAGTTTTTTAAAGTATTTTTTGACCTGGCAACTTTATCG
ATTCGAATCTTTGACGATGTCAATATCAAAGTTGTCAAAGATGCCATGTTAAAAACAATA
TCAGGTCATGTTAGGTTTCCAAACGACCCAGCTTCATCGACGAGTCATACTTCCCTCTCA
ACTGAAAATGAATTAAGAACAAATTTCGATTTCGATTCTCGTCACATTGTCGTCGAAACT
GTGTCAGGCAGAATCGAAGGCATATATCCCCTGTATGACCTTCTCAAAGTATCTTCCCAG
TCCGGATCAATAGGAATCGAGGTACAACCTAAGCCCGTTCTTGAATCAACACCCGCTCCT
GCTACTTTGGATATCAATATATCTTCGGGTAACATCGACGTGTCGTCACCTGTCAAATAC
CCAAAGATCACTTACCCCCGAGAATATATCACACATGTAAAATCTATTTCTGGGGCCATT
AAAGGCCATTTTTTTGTTGGATCTACAGGGAATTTTGACACTGTTTCTGGTATGATTCAA
CTTGTGGTAAGGCCAGTTTTATCAGCTACTTCCGATGACGACGATGATGAAAGCGGAAAT
GAGTTTTCTACTCATTCCGTGAGTGGAAATACACATGTCACATTACTTGATCCTTTGTTT
ACTTTACTCTCTATCAACGGCAAGGCTCGCAATAGTGTGATTGAATCTGATCCCGATAGC
CATGACTCTTCATACACTCCCGCCCTCGTTGACTTATCGAGCTCCTCTTTCCAGGCGTAC
AATAGTAAACTTCGCACAGTTTACTCGACACATAGAACCTCCTCTGGAAGTATCGAAGCA
TACTACCCCTTAGCTTGGATCGGCAACATTGAAGCGAAAACCATTTCGGGAAGAATAGAA
TTAGAAGGGAAGGGAATAGACATTGTCGAGAGGCATGATGGATGGGGTTACAAGAATACC
AAAGCTAGGAAGGGAGTCGAGAGGGACGAGGATGGGAGTAGTGTGAGACTGGAGACGGTG
AACGCGGCTATTGCATTAAGAATCTCTGAATCTTGATGATAAATGGAGCCACCCCATTCA
CACCGGTTTTCTGCGACTGATGAATCTTGAGATTGCGACTTATATTCGAATACATGGGAT
TTTTTGAAATGATTTGGGATGTTGAACGATGGATTGTATAAGCATCATGCCATTTAGGCT
GGATTTTTCCTTTTTCCCCCTGGATATAGCATAATATACATATTAGCGACAACCTTCTGG
GCATCCATTCATAGTCAAATCGACGCCAGTATTTTCACCCAACAAAAGACTCTCCCGCTT
CTATTTAACAATCTTTTTGTGATGATGTTTCTTTGTGTTTATTCTCAA
>99b43857-2ff8-4ab2-8720-87fa21181dd9 (mRNA) 3792 residues [Bfab07:24622-28413 + strand] [genomic] name=Bfab07g00060.1
ACATCCCTGTCGAACCACGTCTAAAATGTACATCACCCGGCCTCTTTTACGTCAGATTCG
TACATCTTCCTATCAGATACGTTCATTCTGACAAACGAACAAAATGCAAGGTTATCAAAT
TTCTTCGGCTAGACTTTCATTAGTGCTGACAAGGCTGTTGTGCTCCATTTACTTATCGTA
GCAATACCCGAGACCGGGTGTAACAAAGGGTTACTGCTCTACACACATCAATTATATCGG
TTCTACCCCATCCTTTGGTATCTCACACGGATCTTGGGCTGACATAAAAACTCCAAAATA
GATTGCCACGACATCTACAGAGCCTTGAAGTGTGGATAAGCTTAATCATTGTATTCAAAG
TGGGATACTTACCCCTTGTCGCTGGTCAGCAACGGGGGAGCATAGACCATGAGGCCAATC
ATATAACACATTTCGTTCCTCACGCCGTACAAAATCAATTACGCTTAATCAAGCCACATG
CAAGATTGATCCTCCTCGTAGCACAGCCCTGCATTGTCAGCCGCAGAACATATCTCCACT
CTTATTTTGTAACAATGAATTTTATATATTAGTTCTACAAAACAATTGACAGAGATCGCG
AGGTAGCGGCAGCGTTTACTTCTTTTCTTTCTCACTATCTTCGCTAAAGGATTATGCGAG
CTTTTCACTGTGTTAAAGTGTTACTTTCCCTTTATTTCAGTTGGAATGTGAATGCTAGTC
CTACCCTTGGAACGACACCGACCCTGAGCGCTAGAAACTCGGCTTCGACTGCGTGCGGTG
ATATCGTTAACAATGAAGGTTTGATGAAAAATGCAAGACCTCTGATTTTTATGCTGATGG
AATAATAGATACCGTTTTGTTCAATGCAACTCTGGCATTTGAATGCCTGACCAGTGTGCC
ATTCAATCCTGCTGTTGCCTCTCGGTTTATCTCATACTATAATGATACGCTTCAGTTCCA
GAGTACTTTGGAATATCTCAAAAGCCCACCTCCAAGCTATCAACAACCAGCTGTGGATCT
AATAGCGGGCCTGAATCGAATTCAAAGCGCGATCAATGAAGGTATATTTTCAAATCAATA
CGAGTTTGAAGCTGCTTTACAGACTCTAGTATATGCCGCACACGATGGGCATGTCGACAT
CCTAGCGGGAGCTCTGTCTGCGTTTAGTTTTGCAAGTCCAAGGGATTTGGTATCACTATC
ATTAGATGGCCAACAAATTCCGAAGGTCTATCTAGCCGACGATCTTTTTGACAGTGACTA
TTTTACAACCTTTCAGCCTTCAGCTATCAAATCAATAAATGGTAGAGATGCAACTACGTA
TCTTTTGGATTTCGCATCCGTGAATTCAGTCGGAACTCTTGAAGACCATTCAGATTGGAA
TCAATTGATGCTCAGTGCAGCTCAAGATATCCAAGGGTATTTCAATACATTCAGTGGCGG
CGCGACATTTTACCCCGGCAACAGTATTACATTTCTTTTGGAGAATGGGACGTCTTGGAC
TGAAAACTACCTTGCTATCTATGATACCCCTGGTCCCACCGGGCCTCTTCAAACTGGAGG
AGACTTCTACAATTTTTTTGTTTTGGGGTTCTATCCTGCATCATATGATCCGTATACGGA
TGATTCGGATGACGATTCAGAAGATAGTTCCAGTGATGATTCATCCACTGCAGTCACTTC
GACGACATCTGCTACTCCAACTCTGACCGGATGGGAAAGTCCAGCTTATCCAGAGATTCC
TGATGTTGCCCAAGAAGATCTTGGAACTTATGGGGATGGAGTTGTTTCTGGTATGTCATT
TGAAAATTTTGCAACACATGAATTTTTTACATAAAAAATGACTTGAGTATGCGGTTTCTA
ATGAAAACACAGGATATTTTCTCAATTCTACTTCTGTTTCTGTTTTAAGTATTCCAAGCT
TTGATGTCGATGGGGATGCTGTATTTAGTTTCCAACAAACAATTTCTCAGTTCATCAATC
AGACACAAGCAGCAGGCTTAAAGAAGGTTGTGATTGATTTGCAACAAAATTATGGCGGAC
AATCTTTACTTGCAATCGATACATTCAAACAATTCTTCCCGAACATCGATCCCTTTGCTG
GTTCCCGTATGCGAGCTCATGCTTCTGCCGATGTACTTGGCAAAACTTTGACTCCATACT
GGGATGGTTTGGCCGAAAACGATGAGACAAAGTATGTCTTAGCAGCTGATGAATGGGTTA
TCACTAATCGGATTAACGCGGATACGAATCGCAATTTCACAAATTGGCAGGAATTTTTCG
GGCCTAATCAATACAATGGTGACAATTTTACCAAGATTGTAAGTTTCTTCGTTTTCAGTT
ACCATCACTTGATCTCTTTGATACACATCTAATCAGTATCGATAGGCACGGTATAATCTC
TCCAATCCTATTTTTGACGCATCTGGTACCGGTCTAGATATTAGCGATGACGCTTTTGCA
GTGTATGGCTATGATGCAAATCCGGCACCATCAGGGGCTCAGCCACCATTTGCAGCAGAG
GATATAATCATTGTAAGTCACCTTCCTATATCATTTTCTTCTCGAAATCTGATTGTTGTA
GTTATCTGACGGTATATGCCACTCTTCTTGCGCTCTTTTGATTGAGATGTTTCGTCATGA
AGCTGGAGTCCGAGTTGTAGTGGTAGGAGGCACACCAACAACGGGACCAATGCAGGCTCC
AGCTGGATCTCGTGGCGCACGTGACTACGATACTTTTACCCTTGACGCCAACATCGATTT
TACTCAACACCTTTTACAAAATCAAAGCTCGACCGATGCAATATTTCTTCCGAATAGAAC
TGAACAACTCAGTGTGTTTGTCTACTTTGCGGATATAAACCTTCGTGATCAAGTACGCAA
AAATGAAGAGATTCCATTACAATTTGCCTACGAAGCCGCAGATTGTCGGATCTACTATAC
ACCACAGACTGTGTATAATTACACAAACCTCTGGCAATATGCAGCCGATGCCATCTGGAA
GAACTCCAGTCTTTGCGTAAATGACTCAACTGGATATTCGTCAACGTCACAAAATTCAAC
AAATTTTGTCGGCCCATCAGGCGGTGCTGAAAAGACCTCTACCAATATCACCGATTATCT
TGCTTCATTAACGACCTCTCCCATTGCAAACTTCATTCTCCAGGGTCTCAACGATGGTCT
TCCAGCCGCCAACGAAGGTGCCTCTCGCAATGCTCCTGCATCTACCAAAGTTATCAAGTG
TACCACAGATGAAGACTGCTTGAATGGTAAGCTTTGTGTGAATATTCCGTCTTGTTCTGG
GGGTAAAGCCATATCTCAGTGCTTGAGAAAATGCCCAGCAGCCGGTCGACTATGCCCTAG
TACCAAAACTAAGTGCACACCACATAGCACAGATGGAAAATTGGGAAATCAAAGGCTTCA
CAAGAACATTTGTCCCCCAGCAGGAATTGCAGCAAAGTGTGAGAGTCAGAATCAGTTGAA
GACAGTTAATCTTAATCAATGTCCTGACTGTAGCAAATGATTAGATCAATGATGGAAATA
ATGATGACTGGGGTTCAGTATTAAGGAGTTTATGGTGTGATAATCTTGGTTCTTTGGTCA
CTCAATTTGGACTTTGTATATATTGTATTTTTATTACTGTGTCCAGCGGTATTTTTTAAA
AGTCTATTCGGAGTTGGGTATCACTTGAAATATTGATTGTATTTACTTGGCACGATTTCC
AGATCTTTGAGTCCCATCGTGATTTTCAAGGCAACCAGATCTTGTCACATATCATGAGGA
TGAAGTCGGTCA
>5d96d8d7-c6f5-45ee-80f2-37de8f9770e9 (mRNA) 2594 residues [Bfab07:28519-31112 + strand] [genomic] name=Bfab07g00070.1
GTATCCTTCAGCTTCTAGACCGTGTCAAAGCGCATCAGCACCGTATACCGCCAGCCTTTC
TTCACATGAACAATGTCCCAGTTTGTTCTTCTGATCAAATTCTCAATTCATTTAACAAAC
CAACCTCCTTTTCTCACAATCACCTTGTTTAGCAATGCCATCTAACGACGGCAAAATCTA
CCCTTCTATTCTCCCTTCCCCTTTAATCCGTCTTTTAAGTCTCGATTCTGGTTCTGATGA
ACCAATTAGAGTAACACTGCATGAAGTAAATCTCCAGAATGCCCCCGCATACGATTGTCT
CTCATACACTTGGTCTGACCCACTATATCATGCTCTCAGTCCGGAAGAGGAAATTCATCT
TAGCAACGATAAACGCGAACATCCTATTCTCTGCAACGGTCAGAACTTGTTGATTACGGA
AAGCCTATTACTTGCACTGAAGGAATTCAGTAAGAATAATGGCGAGGATAACAGAAAGAA
TTGGAAAGATGGGTATTTCAAGAGGGCGAAGTTTATGTGGATAGATGGCATATGCATCAA
TCAAGACAGCATTGAGGAAAGGAATATACAAGTTGGAATGATGGGAGAAATCTACACAAA
ATGCTCGCAAGTAATTATCTGGCTTGGAGTTTCAGATTTCCATTCGCCGTACGCTATTGA
AGTCATAAATCTTCTCTCGAAAATACCCCAGGAAAATTATACTGGCTTACGGATTACTGA
TCTTGAAGATTGGGATATATATCCAAAATTGGGTATCGAAGAAGTTGAAACTTGGAAATG
GTTGGAATATGCAGCATTTTTACAACGTACTTGGTTCAGTCGCATATGGGTTGTTCAAGA
AGCGTTTCTACCAAGGAATATTGTTGTGGTTTGTGGGAGTGATGTTATTGAATGGGGAAA
TATAACAGCTTGTGCCAAAGTTCTTAGAGAAACAGGATTGGGAACTTTACTAATGGAGTT
GTTGATCGAAACTGTGGACGATGTTGAAGGGACTGTATATGTGAATAATACTTTGAACAA
CCAGTCCATCTTTCAGAGTATGAGGGATATGGCTACACTTGGGTCAGAAGAAATGGGCAA
AGTCTTGGATTTGGAAAAGTTGTTGTATTATTCAAGATTTTTTGATGCAACAAATCCAAA
AGATAAAATCTATGCAATCAGAGGCATTTGGGAAAAAGGAGGAAAAACAATTCCACTGGA
CATGACGCCTGATTATCAACGAGATCCAACGGTAGCAAGTGTGTATACGAGAGCAGCACT
TGAAGTAATTTTTGAAACCAAAGATTTGAACATTCTTTCTTTAGTGGAAGATTACACCTT
GGCGACTCAAAAACCTAACTCTGTGAGGGCTATTGGTAATCTTCCTTCATGGGTGCCCGA
TTTTAACTCTTCATCTAATCCTCAACCTTTGGCTGGAAATCCTAGACCAAAACTGGGAAG
TGAGAGATGGAATGCAGCTCGAGGTATTCCATTCGAAGTACCTATTCTTCCAGCCTTAGA
ATCACGACATCTTCTTCCAATCACAGGTTATAGAATTGATGTTATCTCGGAGTCTGCAGC
TAATCAAGCAGAATTAATGGGTAACAATTTCGGTTTTGACACGGTGTTGGAACTTTTGGC
AAGTTATCCGGATCAAAAATATCCTCATGTTGACGATAACGCGGAAACACATTTCGAGGC
ATTCTGGCGAACTCTCATCAAAGACACATTCCAAAAATTGCCGGCGAGAGAGAACGCACG
AAACGCTTTCCGATATTTTATCACAGTGCGTGTCTCTGAATTGAGCATTGCATACAATTA
CGCACTTTTAAAACAGACCTCCGATCTACCCAAACTACAGAAATTATACGAAAAATTCAA
ACAACTCATCAATGACTTGTCCAAACATAGACTGAACGAATCTCTAATACCCACCTGGGA
GGATCTTGGAAAGCTCATTGTGATAGCAGCTAATGAAGATTTAACTGACCCAGAAAAGAC
GAAGCTGGACAAAGACTATGGGGACTTTTACGAGTCTTTTAGAATTGCCTATGCGGGAAG
AAGAATGTTCAGGACAGAAAAAGGATATTGGGGTATTGCTGCACAAACATTAGATGTCGA
CAATGAAGACGAAATCTGGGTTATAGCTGGGTCAAAGGTACCGATGGTTTTAAGACCAGT
GAGAGGAAGTAATAGTGTAAATCGGGAATTGATCGGAGAGGCTTACGTACATGGTATTAT
GAATGGCGAGGTTTTGAAACTTCCGAGGGGAGGGTTAAAAAGTCTATTTTTGGAATAAGA
GGGAACCAAATGGGTGGAAGCAAAGGTGGATATTTATAAAGATACAGTTTTGTGCAGAAT
CTTGTAAGAATCAACGACTGGGGTTTCTGCTTTGAATCATATAGAAGTGAAACACTTATT
TAATATATAGGAGGAATTGATGAGATCATTTGATTCTACTGCCATATTTTGTCGCTGAGT
TCGTGTCTTTAGTCAACTATTATTCGGAAAATGTTCTATCAGTCACAAATTTCCCAACAA
CTGTAAACTAGGTAAATGAGCGGAAGCATATACTAGTTTTCTTAAATCTTGGTCAATCAT
AAAAAATACCGTTA
>6228f854-dbaa-4830-82ae-47d2f1c0eab1 (mRNA) 1359 residues [Bfab07:43960-45318 - strand] [genomic] name=Bfab07g00090.1
ACGATGGCGTAAAACTAATTTTATGCAAACTTTGATTCGTCATATTACTAGTATTTTAGC
ATGTTGAAGTATCAATCGTTCCCAGTATCTTTGTGGGTTTGAAGAGAGTCTCAGATAACC
TACTTTATTATTTCTTTTTCAAGATAGCACGGCGGCTGTATTCTAAACTTCAATACATTA
TCATGTCGCTCCAAAAGCAAGTCTTCCTTATTGGTCCTGGATATATTGGTGGGGAAATAC
TAGATCTTTTACTCCAGGAAGGCTGCTATGAGATTACGGTACTCGTTCGCAGGCAAGCTG
CTGCCGAGGAACTCGCAAAACTTGGTGTCAGGACGGTCATAGGGTCTCTCAGCGATTCAA
ATATCATCGCAAGGCAAGCTTCCTTGAGTGATATCACTATTCATACTGCAACTGCAGACG
ATCTTGTCTCGGTAGAAGCCGCCATCGAAGGCATCACCCAACATGTGCAAAGCGGCCGAA
CTGCGATTTATATCCACACAAGTGGAGCGAGTTTGCTTGGAGATGATTCAAAAGGCTCGT
TCGCCACCGAAGTTTTCTACGAGGATGATAGACCGGAACAAATCGATGCAGTATCTGACG
AGGCACCACATCGGAAGATTGATCTTGCCATTGTCAATGCCAACAAGATTCTCGGCCCAA
AAGCGAGACTAGCAATCATGAGTCCTCCTCTCATTTACGGAATAAACTCTCGGGAAAAGC
GATTATCGATTCAGTTACCCACTCTGGCTCGATTTGCGATAAAGCATGGCTATGCCGGGC
ATATCGGGAAAGGTTTATCAAAGTGGTCACAAATACATGTTCGAGATTTGGCAAGAGGAT
ATATGTCATTATTACACACCCTAGAGATCAGTGACTTGGATATTGAGAACCCTTACTACT
TTTGCAATAATGGAGAAGACCTATTCTGGGGAGAATGTGCTTCGGAGATTGGCAAAATCT
TGTACCAGGAGGGAAAAATCAAGAGTCCCGAGACCAAAATTATACCTTTGGATTCTTACA
ACGACTTATTTGGGCCCTATTCATCCGCAGTGATTGGATCTAACTCCTTGAACCGAGCTA
ATCGATTAAGGAAACTTGGATGGGAGGCAAGAGAGCAAAAGACTCTCTTATCTTTGCGTG
ATGAATTGATGATGATATTGCAGGAAGAAAAGCCTTTTTTGGGATATTCTGCACCTGTAG
CTTCTGGATCGAACCGAGACTGATAAGTCTCGTGGGTTCAATAAGAAGTTCTTAGATATG
GGAATAGGATAACAAGAAGCACCAAAGCCATGCATTTCCAAAATAACGAAACAATGACTG
CTGGCTGGACTAATTATCATGCGACCCGTAAGCTTTGTG
>86dd68f2-2895-4396-be3b-d73a697b0ae3 (mRNA) 2651 residues [Bfab07:45606-48256 - strand] [genomic] name=Bfab07g00100.1
CTTGCTTTTAGTATCTTTTCCTCTCAAAACGTAGAGAGAATTAAAAGCATTACCAAAAGA
TTGTTTGGTTTGTATCATTCAAAATTGGAAAGAAAAAGTGACCGGAATATGGCTGAACCG
GCTGAAAATGCCCCTTCCTTCAGTGCAGACGGAATTGATAAATCTCGACTTGCTCTTTCC
TTGTTAGAAGTTCCGACATTCATACACAGAATAAACTTGATTCATCTTCTCTTGCTTTTA
AGTATTTGCATCCTACATCAGTCTCTCTAAGAGATTGATTTAACCCTACGTCCCCCGCTA
GAAGACCTTGAAAGACATGGACTTCATAGGATTTCCAAAACACAAATATGCGACCGACAA
GCCATTTATTTACACAATCCTTCCATCACCCACGTCCATTCGACTTCTTGAAATAAAATC
AAAGCTGTGGTGTCGTACCAAATACTCTTTTCATGTAGTAGAACTTACCGAAGCTCCGAA
ATTTGATGTTGTATCCCATTCGCGGCGAGATCTTGTTCCACGAAATCATATCATACTCTG
TGATAACAAGATATTGAGAATCTGCGGAGATACAAAGAATGCCATCAAAGCTGGAAGGGA
AGTTGTTTCAAAAACTTATGGAAAGATGAAGACACGATATGTTTGGATCGATTCGATGTG
CATTAACCCAGAAGATGCTATGGACCGAACTGCCCAAGTTTCAATGATGCCGGAAATTCT
CAAAAAGGCTCGTAGCGTCATTATTGGACTTGGGAAGAGGGATGCTTTCACTTCTGATGC
ATTGAAAGCCCTGAAAATACTATCTTCGGTGCCACATGATGAGTGGTCAAATTTAGTGAG
CTTGGACTGGGAGTGCCAGGATCAATACTTCCAAAGGCTCAACATTGCACCTTTGCAACT
TCGGTCATGGCTCAGCCTTATAGCTTTCTTTAACAGACCGTGGTTTTCAGGTATCTGGGC
TGTACAAGAAGTTACGATCGGAAATGATGTCATTCTTGCTTGCGGGAAGGAAATGATTCC
TTGGGAAACAGTTTCGAAGACATTATCGTTTTTAACCCATACTGGGTGGTACACGAAACT
TCACACTAGTCATTTGATCAAGTTTCCCGGCAATGATCTTAAGAGTAGAAGACTTAAAAA
GCATCAAATACTGATGAATTCAGAGGTTGGCCTTAAGATGGCAGTTATACAGCTTCAATC
CACTCGAGCAGGGAGTGAAACTAACAAACAACTTCCTTTATTTCGATATCTTCTTCGCGC
CCATCGATATTGTGAGGTTTCCGATAAACGAGATATTATTTATGCGCTACTTGGGTTATC
GAGAAAGGACGGTCTGCCATTCACAAAGTTCCCAAATTTTCTTTCAACTAATTATGAAAT
GGCGACACAAGATATTTATACTAATGTGGCTAGAGTCTTGCTCCGATGCTATGGCCTAGG
AATATTATCTGATGTTCAGGATTCAATAGCGTCTATTCCAAATCTACCGACGTGGGTTCC
AGACTATAGCATCGCGCGAAGACCGTTACCTCTGTCAATGCGCGGCGACTGTATCTGGAG
TGCCTGCGGTGATATGAAGTGGAATCAAAATTTCTCAGAAACTGAGACCCGCTCCTTGAT
ATTGCAAGGTATGCTGCTTGATACAGTCTGTGAAAAGGTCAAGCAACAGAATAAGTCCCT
ACATCCGATGGAATTCTTAGATGGGATATATGAGGTTGCAACTCGTTTAGACCCTATATA
CCCACTTTCGATGGGTGGCAAGTAAGTTTCTCGATGTTTTTTTATCATTTTCTCAATGAA
TTTTCTAACCTCCGAATCAACAGATTTCAATCTTCACGTGAAGCTGTATGGCGTACTATT
CTAGCAGATACGTATCGAAAGGAACATCCAGCTCCGCAAAAATGTGAGGAACTCGTAGCA
CACTATCAGGAATGGGTCCGCAACGGAGTACGCAATGGATCTCAGGCAACAAATTCTATG
CAACGACTCAGTATCACTGAGAGGCAACCGCGAAAATACGGCAAAGTGGACTTTTCAAGT
CTTGAGAAAGAAATAGAAGCTGCAAATGATGCCCGTACTTTATTCCGAACTCGCAAAGGT
TACCTCGGCATCGGAGCACAATCTTTACGACCGTCTGATGAAATTTGGGTTTTAGCGGGT
GCTTCAATTCCTTTTATTCTTCGACGAGGTGAAGACGAATCCCATGAACTAGTTGGAGAG
GTATATCTACATGGGGTTATGCATGGAGAAGCTTTGGGATGGGGACATGAAATGAGGAAT
GTATTATTGAAATAAGCATCAGGACAACAAATCTGTGATGGGAGATATTATTTTGTCAGA
CTCAGTCTTGTGAGCTTAGAGAATATTCGAGTCAAAATAACTGGGGGCAGTAAATTAGGT
AAATGACTTCGCAAAACTTAGATATCTTTCAAGGCATCTAAAAATTGCAGCAAGAAATCT
CTTCATAAGAATATCTTCAAGATTACTCGTACAGAGTACAAAAATCACACGTACCCTGAC
CGAATCAACAAGATCATCAGGTCGTGAGGCATGAGTACTAATAAAAATTTGATTGACTTT
AGCTCCGAGTGGAGAAAAAATTGCGGAAATATGATCCGATCGGCATTGGTCAGGACTAAA
ATATTTTTGAG
>8f865ff4-b39e-4011-951c-7ba3043a440b (mRNA) 2785 residues [Bfab07:49224-52008 - strand] [genomic] name=Bfab07g00110.1
TTTGTCACCAAGGTCCCACAGAAAGAGACGGCAACACTGGGATTAGGAGGATTCAGATCA
GGAAAAATTCCAAGACATTTCGAAATACCGAGAATTTGGCAACAAACAGGAAGAGAGAGA
GAAAAAGCGTGAGAGGCCAGAACCAAGAAAAGCGACAAGGACCTATCGATTCACACATCT
ATTGATCTCGTTCTAATAATATGGCTCTAATTGTAAGATAAGTTATTCATTCACACCCTC
ACACCCTCACACTCTCACACCCTCAAATTTTCGTCTTCTACAATTGCTTTATGGTCGCAG
TCGCATTCGCATCCGCATCATCTTCACACCCCTTCGCGCCTCTATTCTTTCTTAATGCTG
CGCCCGTGTTTGCGTTGTGGATGGACGGGCGCACGATACAGTTGTTTCCGTGGACGACAT
GCGACTGGTTCGCAATAATAACGAGGATGTTTGGGGGGTTTCGATCAGGCAATCATGGAA
CCTTGTAACTGACCTTGTGTTCTCTACGATAGTTATGTCTCGCGCATTATTGCGACACTC
ATGGTCCAACCCCAGTCATGGTAACAGAAGCACTTCCAGTAGGTTGTACTTCGTGTCCAG
AAAAAGAAGAACCCATTCCTCGGAGGCCTAGTACGAGTAAATCGTTCAAATCCTCGGATC
CTTCTTCAAACATAAACGCGCATACTTCACATAGAACGAACTCAATTGTTTCCGAGCCAG
ACGTTGCGGCGAGTCGGCCAGCTCTTCATGTAAACTCAAGTCCCTCGAATGCGCCGAATA
CAGCGGGTTCTGCGGGTGAAACACCTCCCCAAAGTCCTAGAGCACCTGCTTTGCAAAACA
CACAAAACACGACAAACCAATTGCGACGCGATTCGAGCTTTCGCAAAACATATCCAAGTG
AGAAGCCAGGTCCATGCGAAAATTGCGCTCTTACTTTACCCAAGAAGACCAAGGAGGAGA
TACCCACAAGTCCTAAACCTTCGGGGACTGGCAAACTCGATAATGGTCCGATCTTGCGAA
CAAGGAAGCCTTATGAGCGCATTGCAGGTCAGAGTACCCCTCCCAAGTCTGCATCCTCAG
ATTCGGACGATTCGGAATGCGCAATTCAGAAAGAAGAACGGGGAGAGCAACACCAGGCGC
GGAGACTCTCGGTCAAAAGATCCGACACATCTTCCACCTATACTACCAGAGAATTCCTTT
CGCATAACCATTTTGTTGACTATACGTCAACGCATGAACCTCTACAACCCACTTCTTTCT
CCATTATTCGGCAATCTTGTCTTCGTACTCTTTCTTGTGAAACCCTTCCACCGTCATCAA
ATCCCACGCCTAATTCCACACCCTCCTCCCCTTTTATCTCCAGTTTCTCCTCCCACCTCA
CATCTTCCACAACTACCTCATCAGCTGGTCCAATTTTCTTTGGCGACCCAATGGCTGGCT
ACACAACCGCATACATATTCCGCATTCCTGACCCCTCTGCTCGTGGTCGTCGTCGAGTCT
ATGCTTTAATCGCCCTCTCCACCCAAAAAGAGCGGATGGCCATGCGCACCTTTTCTTTCC
TCGACGCTGCCTTCCGCGAACTCGCAGATTGGATCGCACGTCTCGCTGATGAAGAACTCG
CACGTTCTGAATCAGCACTCCAATCTCCTAGAGCTGGCGATGAGAAAAACGGCAATGGAA
TCAGCGGCGGCCCGTTTGGAGGTGGTGGTACGACAACCACACCTACTTCATCTTTCTTAA
GAGGTGGCAATAGAGGACCGGATAGCAGAATGGCCGGTGCGAGTTTGAAAGGAAGAGGTT
TAGCTGAGTTGGTGGGACTGCCTGATTTTTTTATCGAGTTGCATAGCAGGTTTGTGAGAT
TGTTGGCGGAGATTGAAAGACCGAGATAAAACCTTGCCTGATTCGTGAACCTTCGATCTT
AAGTCCCACACTCGAAAGTACCGAGGCGAGTGGAAAACAAGTATTGCCTCCTAACTTTGG
CACTTGCAAAGGAAAAGGTGTGGCGTTATGACTTATGGCGAAGCATAGATATTGGCGTTT
GTGATTCTTGGTTCGTATTATTGCTATATTATTGTGTGAGGTTCATCTAGTGCAGATCGG
ACCACAAGATTGTTTGGAGTCTTGAGTCTTTTCCTTTACCTTTTCTTCTTGGGTTGTTTT
AATCCTTATTTTCATGTGGTGGGGTAATGAGTCGATTTGTTGAGGATGTGTATTTTATGA
GATGATCGATCTGGCAAATTATCAGCCTTTTTACAATCATCTCACTGAGGAATGTCGGAA
ATATGAGGAAGATCTATGGGTATGGGCGTAGCTGATGAGCTGGAGATTAGAACAGGAGAT
TGTAGGATGTACGGGTGTATGAGAAATGAGTAGTAAGATGGTAATTTTTGTCGTTATATG
TATTTGAGATTGATTTTGATCTTCAAAGGCGCACTTTCAGGCAAGCGAAAGATATCGATA
CCATGTGTCGTGGTGGGTTGCGAAATTGTTGAAGCTGTATAAATTTGTTGCATTGGTATA
TATTTATGGAAGTAATAGAAAGTTGTGCGACTTCTAGCGAGCGTGACTTTTCCGGGGAAC
ATGGAATATGAGGAAATCGAAGAGACTGATGGAGAAGAAATGGGGTCTGTGAAGCGAGGT
TTACTTATGTTGTTTAGTAGGTAGTAGTTAGTTGGTAATGCGTGAAGTATAATATTTAGA
GCAAATAGAATTTTGCTGGCACTCTTTCTTTTGTTATGTTGAAGAGATTTTTGGAGAAAC
AAAATTTACAGTGCTAGGACCAAGT
>450ef304-5674-4c0f-8ad6-9c891991d8be (mRNA) 3051 residues [Bfab07:54527-57577 - strand] [genomic] name=Bfab07g00120.1
CACCTCACCTCACCTCACCTCACCTCACCTCAACTCAACCCAACCCAAGTCAACCCTTGA
AGAATTCGAAATAAACACACACAACCACCGCAACTCACAATTCAACAACTACCATACCAT
AACAAGTACCACCACAGACCTTCGGATCTCTACATAAACACAATCTTCAATTACAATCCT
GAAATCCATTCATGCGCACAATCCTGCAGACAGGAAAAACATAAATACATACGCTCAATA
ACCCCACTACAAATACATCACAAACAATCAACAATTCCCTCGAGATCAACAACCACCCCT
CAACTCGATAATAACTCGTATATTCTCACCCTTCAAAATCAACACCACTGCGGCCTTCCT
CTCCATCGGCCTTCTCTAGTGTTATACCATTTCATGCTAAATTAATTGCACACGATCTAA
GACGAATTCTGATAGAACGCGATCTTGTTTTCGCGCCTCAATACCACATCTCATACACTT
ATTTCAAAGATACCCTCTTCCAACAAAAAATACATATACAATGGCTGATGAGCTGGCAAC
CAAGCTAGCGGCTACTCAGATCAAGTATGCTCGTCACTCCTTGGATATCTTTAATTGTCA
CTGATATGAGAATAGTGATAATTCTTCCCCGGACAACTGGAAAGCTGGTCTAAACATTCC
AGCGAAAGACACGAGGCAACAGACAGAGGTATTCAAACACAGTGTTGTCTAGTCTATGTT
TCATTGCAGTTGCTAACATATCCATGTAGGATGTTACCGCCACCAAAGGTCTCGAATTCG
AAGATTTCTCCATCAAGCGAGAGCTGTTAATGGGCATCTTCGAAATGGGGTACGAGAAGC
CATCCCCAATTCAAGAAGAAGCAATCCCCGTGGCCCTTACAGGTCGAGACATACTGGCTA
GAGCGAAGAATGGTACCGGTAAAACTGCCGCCTTCGTTATCCCTGCACTCGAACGTATCA
ACCCTAAAAACACCAAAGTACAATGTCTCATCCTGGTACCCACTCGAGAACTAGCTCTTC
AAACTTCACAAGTCTGCAAAACTCTTGGACAACATCTCGGCATCAACGTTATGGTCACTA
CTGGTGGTACTACCTTGCGAGATGATATCCTGCGTCTCCAAGAGCCTGTTCATATCATCG
TCGGTACACCTGGTAGAATCCTCGATTTAGCAGGAAAAAATGTCGCGGACCTCAGTGAAT
GTAACATGTTTGTCATGGATGAAGCTGATAAACTCCTCTCACCTGAATTTACTATCGTCA
TCGAACAACTACTTCAATTCCATCCAAAGGACCGACAGATCATGCTCTTCAGCGCAACAT
TCCCAATGACGGTTAAGGACTTTTCGGATAAGAACATGGCCGACCCCTACGAAATCAATC
TTATGGATGAGCTCACTCTGCGCGGTATTACTCAGTTTTATGCATTTGTCGAAGAGAAAG
AGAAAGTACATTGTCTCAATACTTTGTTCTCAAAACTACAAATCAACCAGTCGATTATAT
TTTGCAACTCTACAAATCGAGTCGAACTTCTTGCCAAGAAGATTACCGAATTAGGCTATT
CATGTTTCTACAGTCATGCTCGGATGATCCAGGCCAACAGAAACCGTGTTTTCCACGACT
TTCGCAATGGCGTCTGCCGCAATCTTGTTTGCTCTGATTTACTCACTCGTGGTATTGATA
TTCAAGCTGTGAATGTTGTTATCAACTTCGATTTCCCTAAGAACGCCGAAACTTATCTTC
ATCGTATTGGTAGATCTGGTCGATTTGGACATCTTGGTCTCGCAATCAACCTCATCAGTT
GGGAAGATCGCTTCAACTTGTATAATATCGAGCGTGAACTTGGGACAGAGATTGCCCCAA
TTCCTCAAATTATCCCGAAAAATCTCTATGTCTACGAAACTCCCGAAAACATTCCACGTC
CCGTATCCAATTTCCAAACCAACACTCGTCAGGCATCAGGACCAGGACGTGATCAGCAAC
AACCCACGCAGCACTCGGGAAATCAGAGAACTGGTGGTCAATATAATAATTATAATAATG
GACGTCAGAGTGGCCCAGGTCAAAACCAGAGTCAAGGACAAGGGCAAGTACAAGGGCAAG
GACCAAGACAGAACCAAGGTCAGCGTCAAAACTATTCCAGGGGCCGAGGTGGATTTGGTG
GTGGTAGAGGAGGTGGTCAAGGACCACGACAGAACGGTTACGACAACTCAAGAGGAGGCC
GAGGCCAGGGTCCTCCACCAGCTCAATAGGCTTGTGTACCAACCGTGTTACACGTGATGA
TGATGTTTGGAGTTTTGTACATATAACCTTCTATTCCCTTTGCGATAGACTCGATTTTAC
GACGGACATGGCTGCGGGATTTTTTTGCTCTCGGCGTCGAGCTGTTTCTGGATGCATCCC
GCTACTCGACTTGACGTTCGATTCGGCTCATGAATTTCTTCAGCTGTCGCTGAATTTTCG
TGTTTGTATCATACGACTCTCGTTTTTTCAATTTCCTCTCTTTCATTTTCTCGACAGATA
ACTACTCCGGGTCGCATGAGTAGTAGCGGGAAGCAAAAGTTTCAGCGGATTCGCTCTGGT
ATGACGGCGTGGCGTAATGGTAGGGCGTTCAATGAAGGTACTCGCAGGAGAAACTTTTCT
AGTCTAGACTGGTTCTGCTGTAAAGGCATTTCTGGAATGGGCGATGGGTAAATCTGTTTT
CTTCATCTTATGGGCTCTGGTAATGAGCATTTGATGAATGGTTAGTGATGGGTGGGCCGA
CGGGCGGATGATTTTTTGGGTTAATGTTGATAAAGGTGATTCAATCAACAACGACTCGTG
GCTGGCATTGATGAGAAGGTAGAAGGGGATGGCGCTGTTGAGAGTGCATTACAATGGTAA
TGATGGTCACTTCTCACACTCTTGAAGTGGGAAGCACGACATCTTGGGATGAGGGGGGTT
CACAGAAAAATAACATAAAAAAAACTTTAGGGAGGTACCCACGATCTTGATTTTAGTTTG
GATCGAGCATGGACTCGATAGCTTCCATCATTCTCAGACAATACTATTATT
>21457fe8-a378-4530-b641-0300b4dc96e3 (mRNA) 2327 residues [Bfab07:57850-60176 - strand] [genomic] name=Bfab07g00130.1
CTGATCGCGTCCAACGCGTGGGAAGTTTAAATTGATTTTCGGTACGAGACTGAAGTTACT
TCTGCTAGAATCTTGGGAATGCGAATACGTACACGAACCTCATCATGCCACACTCTATAT
CCACCGGAGAACCCTCGATACAATCACAAGAGAATATGGCAGATAGCGAAGAGAACCGGG
ATGACGCACAAATAAGTCAAGAAGCAGAGAATGCGTCTGCCAACACGCAGGTTGCTGAGT
TGAATGATGACGAAGATATTACAATGGCAGACGCTGGAGTACAAAGCGAGGCGATGCCGC
AGGCGGCTGCGAAAACCGAGACCAATTTATCAGATTTGTTTGGAGATTCAGAATCTGACG
ATGAATTCCCAAGTACAAATGCGAAAGAGGAAAAGGTGTCCAGCTCACCTGAAGCGCCAG
CTTCCACAGTGTAAGTATTGAAAGCCATGCTCTGTACTCATAAGCTAAGTATATATCAAG
AAATATAGGTCCTACATCGCGATCATCCGATCCGGAAGTTATGCGATCCTTTTATCAGAG
ACTTTTCCCTTGGCGCCACTTATTTCAATGGCTCAATCATTCTCCGACGCCCTCAACCGA
CTTTGGACATCGTGAATTTGCATTCACCCTTCAAAACGATGCATACTTGCGATACCAAGC
ATTCCCAACCTCCGATCTGTAAGTGATGGTGTATCATATAGGCCCACTTGCGCTAACCAA
CTACAGTCTACGTAAGGATGTCCTTCGTCTTATGCCGTCCAGATTCGAAATTGGCCCAGT
ATATAGTACAAATCCCAGGGATCGCAAAACACTTCGCAAGTCTTCCGCCTTTCGACCAAT
AGCCAAAGAATTATGCTTCGATATCGATTTAACGGATTACGACGAGATCAGAACGTGCTG
CGACAAAGCAAACATCTGCAATAAGTGCTGGCAATTCATTACTATGGCTATCAAAGTGGT
TGATGTTGCGCTACGCGACGATTTTGGTTTCAAACATATCATGTGGGTATATTCTGGAAG
GAGAGGAGCTCACGCTTGGGTATGCGACAAGAAAGCCAGGCAAATGGACGACCAGAAGAG
AAGGGCTATTGCAGGATATCTAGAGGTCATTCGAGGTGGATCACAAACTGCGAAAAAAGT
TAATGTGAAAAGACCACTGCATCCGCACGTATTGTATGTACATTTATACTTCAATTCTTC
CTTTTACTAATAAGACGCAGACGAAGTCTCGATATACTTAAAGGGCACTTCCAAAACGAT
ATCCTTCATGATCAAGATCCGTGGGAGGAAGACGATAAGATCGACAAGTTATTACAGCTT
CTACCTGACAGAACACTGAATGAAAGTTTACGAAAAAAGTGGAGCTCTGCTCCTGGACGG
TCATCAACATCGAAATGGGCTGATATTGATGCATTGGCAAAATCTACCAAGGGGTTGGAT
CCAAGAGCCTTACTAGAAGCGAAGCAAGATATTGTTCTCGAATACACGTACCCTCGACTT
GATATCGAAGTCAGCAAGCATCTCAACCATTTACTCAAAAGTCCTTTCGTCGTACACCCA
GGCACAGGAAGAGTGTGTGTTCCTATAGACACCAGACATGTGGGGGATTTTGATCCTCTG
GCTGTACCAACTGTGACTGAACTTCTGGGTGAGATCGACCAGTGGACCCCGCCCGAAGCT
GGTGATTTGGATGGAAAAAGCATACAAGATTGGGAGAAAACAAGTTTGAAGCCATACGTA
GACTACTTCAGATCATTTGTCGCAACTCTAATGAAAGATGAAAGCGATATCAAAATTAAA
AGGGAGCGAGATACAGATGCGATGGCATTCTAGTGTTGTGGAATGTCGTCACAGTCTTTG
GCGTCATGGGTTGATGGTGGTTTTGGGATGGATATACTAGGTATATGGATAATGAATGAG
ATATGAATATTAATCCGAATGATTAGGATGCTCAAGTAGGGAGATTTATGTTACATTGCG
ATTTCCCTTTAAATTACATGTGCTTTGCTGCACCGAGAACAACATGAGCCTGGGCTTGAG
CTTTTCAAAAAATCAATTGCCACTCGATGATCGGCCGCATGTCTGGACATTCTTTGCCAT
TGATTGCTTCATAGAGCAAAACTACTCACGTCTAACCTGTACGTGTAGTGAGTGAATCCA
TAGGTAGGCACATCAAGTATAGCACAGGGCCAAATTACAGGTCTCCTGGGAATAAGTGTC
TTTTGATGGGCGAATCCAGGGTTCCATGTGGATGTATTGAATTCGAATGTTCTCAGCCCT
TTATCGATTGGCTTGAGAATACAAGGCCGCGAAATCCAGTTCTTTCT
>f9761217-99dc-428c-94dc-5f9bf797bdef (mRNA) 3073 residues [Bfab07:63987-67059 - strand] [genomic] name=Bfab07g00150.1
TGTCTAAATCCTCAGAAGACGGTCAGAGGCGAGGCAAGGTAAGGCAATGCAATTCATCCT
TCCTAAGGCATCAATTTCAGTTGAAATGCCATAACAATCGACACCTCATTGCCGTCTCTT
CCGTTTTCTCAAACCCACCCATCTCGTTCTCTTCCACTTCGACGGTTTTTAAATATTGTG
TACTAGATTCTTGAACTCCAATTCTTCGCGGAAGACACCCCTGGAAGTCAAAGTTCTGGT
ATCTCAATTCATCTAATTTCCACTTTTTGTATCGGCGGTCTGAGTCTACTAAATTTATTC
TTCACTGCACTCCAAATTTATTCATCGAGCTCGATCATTTACAGGTTTCTTCCCGCCACA
AGTATTCCCATTTGCCATTATATCCGGATGAAAGGTTTGATCGGCCAAATGTGCCTCTAG
GTATCATACCCGTCGATCTGATCGGCTTGAGAAATAGTTCGATGAGTTAAGTTGCCAACT
ACACACTCATATTATTCTGATACAGCCGCAAACTATACCCAGCTCCATTTGGTTCTCCTT
CATAACCCAAGCCATCATACTCAACAACTTACCAAAATACCAGAAGTCTTCTTTTGCAGC
TGCAAGCGCCAATTTCATTGGGATATTTGCAGAAGACCTTTGTCTACATGTCCTAGGGAT
TAGAAATCGCATTTTTCGAAAGCCTTCTCCTATAACTACAGTCATCAATCTCTCATAATA
CAAGCGTCTTATCATAAGCAAATCCATCACAGACATGTCACTAACAACGAGAATGAATGG
CTACTTCCGTGAGCAGAGCCAGCGCGCTCGTGGACTTCGCCTTCTTAAACCATCAACTAC
TCTTCCGCGTGGCGTCTTGGGCGGTCCTAGACGAATAATTGACCCCGACTCGGGTCTAGT
ATCGCAGGAAACAACTTCACGGGAACTTCAAGTCTCGGACTACCACTGGGATTCTCAATT
TGAGTAAGCTGCTTCCCTATCTTTTATCATTTTCTATTCACTCAATGTGAAAAACGGCAT
CTGACATCCATTAAGGGAACTTTTAGAAGCAAATTGGGAAGAATCTGATAAAGATCAAGA
GCTCACCGCCGAGGAAGCCATCACCGCACAATTCAAACGTAGAAAGCCCCGTGTACCACG
TTTAATGCAACTTGCGGTCGATTCGATTGTTAAAAACATTAGTAGTATTACCTATGAAAG
CATCAAGAACATGCCTTCAATACAGCTCGAGTTCCTTTGGCGTGAACTGTCCAAGAGGTT
AGTTATAGTCATTTCCCTTACTTTACTATTGAATTGAGGAGCGCTGCAAGGATTCTGTAT
AATCCTAATTGCAGGGCACATAATTCCGAATATTTGACAACTGCCTTGCATACAAGTACT
GATTTTAGATAGATGTGTCAACAGTTTTAATACGTGGAAGGCCTTTTCAAAAGTCCTCGA
TCGACAAGAGGGTGCCATTCTAAACCAATTTAGATATAGTGGTTCTGTTGAAGAGCCAGT
CCCGTCCTTATCTGTCTATACAAAGCCACTCAAATCGCTTACTTTCGACTTTCTTGTACA
CTTATCTATTACCACTGCTTTCAGCACTTCGAATATGGTCGAATTATCTACACTTTCTAA
CTTAGTAGCTCTCGAGATCTCTAATCCAAAGCATGGCAAACATGTAAGGACTGCCGGTAA
GCAATTCGATACGAGCTTCGGAGACAGAGTGATCAAAACCTGGGGCGAAGTAGCAGCGAC
GGGAAAAGGATTCAAAGTCTTGAGAATCTTGAAGCTTCGAAACTTCCTGGAAATCACAAA
CAATTGCTTCCAATACTTAAACGACTTTCCTGCTTTGGCTGTTTTCGACGTTGTGGACTG
TGGCTTCAATGGGTTGGCTCAACTCAGTGCTGAGAAACTTGGCTGGGAAGTACACCCTGA
TGGAGCATTACTTGAAATCTTACAGTCAGATTGTGTAAAGCATATTATGGCTCTGCGCGC
AAGTCTTGGACTTCCTGTAAGTCGTTTCCTTTTTATTCTTGAACCCCTTTTTCTCTTGAA
AGGATCTCGGTAATGGTCTGAGCACGGACCTTTGTGTTCTGAATTTGTCAAAACCACTCG
AGCACGTGCCTTGCATATGCTATTCCAACAAAACAACTTCTAACAACAATTATCACAGGC
CAGACCAATCCGTAGATCCACTGCCAAACCTTTGTGGGATAAAGCAAAAGTCACAATGAT
ACCTCGAGCAGATGTACCGACCTTACTTACAGGAGGAACTTCATCCGCAGCGCGAAATAG
CGCATATCTTCACGCCGAGGAGCAAGTGAGAGCGATGGAAAGAACCCCTGCTGGCCGCGC
CAAACTCAAGAGAACTGGCCTCTCTCACTTTGAAGCTGTGGATTACATCAGTCGCAAAGA
ATATCGTGAGCTTGAAACTTGGGAATTCCGCACCCTTACCTCTCTTAATCGAATTAGCGA
ACTTCGCAACGATGAGGACTTGCGTGCCGCTGGCTTAAAGGTCGACGAATTTGTTCCCAT
GGTCTCCGGTGAATTCATATCTTCTATTCCATTTGTTTCTCTTCGTCTCGGTCCAGAGCT
ATCTTATGCACCGTCGAAGGCGGATTTGCATCAGCCATTTTACGATGGTGGAATGAGTGA
TAGATCGCTCAAATATACTAGCAAAAACCTCGGAGTTGGCGCAAAAGGCTATGTTTATAC
ACGTATCGCAATACCTGTCGCTAGAACTAGGATCCGTGAGCAGTCCGAGGAGATAATGGG
TAGCGATGCTAGTGGCTCAGGATCTCGACCAAGCAAGCGTAGGAAGGTTAGAGGAGACAA
GAGACAACAAATAGGCGATCTCTTGGCGGGAGTAATGGGAGTTATATGATTTCTGGAGCT
ATTATCGAGACTTATGGTGGTACTTGGCGTGTGGATGCTCCTAGAAGGTCGGCTTCGGGG
CACCTCGGGGCACTTCGAGGACTTTTCGTGGATTTTCAAGTTTTCTTTTGATAGTTGTAG
GAGTTCTTGTATATGCGTGGTTAGGAATGCACAAGCGAATTTTAAATCATAGACTCCAAA
GATAAGAAATAAT
>027e9599-3a29-4a98-b497-956a07818a92 (mRNA) 2285 residues [Bfab07:67987-70271 - strand] [genomic] name=Bfab07g00160.1
ACTTTCTACCAGCTGCTGATTTATCAGAGACCCTTTATCGTACTCCACATCCAGAATAAT
CTGCACATAAGAAGCATCTATCATCCCATTAAAACGAAAGACAAAAATAATCCAAAGTGG
CGCACTTTAAAAAGATCATCCTATTCTCACTCCCTTTATTTGCATTCTTTGTTGCTCTAC
TAATCACGCTGCGAAACGGACCTGGAACGTGGGGAATTGCTGGACTTGATCTCGGATCAG
GAGAGGAGAGTAAAGGGAATCTAGAAATTGTTAGTGAAGAGGCAATAGAACTAGGTTCAG
AGGAAACTATGGGTGGTGGTCATGGATACCGCGCCGTGGCGTATTTTGTAAATGTATGTG
GATTGTTTCATTCTTTTTCCGATGCTTTATGGGGAGTGGGAGTGCTGTAGTCAGGCTCTG
AGTGAATGAGGTTCGACGGTTCAAGGACATGGGATGGATATTGGAGTGCCTTCCCCGAGG
AACAATCCAAAGGATGGAAATAGGAGAGAAAATAACCTTTCGGTTTATCTCTATCATCTT
AACAGATGGTGAGACAACGCGACGTTGTACAAGTGTACACGATAGTCTTGCGATTTCTAC
GAAGAAAGAGAGATGGCAAGAAATACTAACATCATCCAGTGGGCAATTTACGGCCGCAAA
CATTTCCCCCAAGAACTCCCCGCCGAGAAATTAACCCATATCCTCTATGCCTTCGCCAAT
GTTCGTCCAGATTCTGGCGAGGTTTATATGACTGACGGCTGGGCCGACACTGATATTCAT
TTCGAAGGTGATTCATGGAATGATGTCGGTACTAACTTATATGGTTGCTTGAAGCAGCTC
AATATCCTCAAGTCACGAAATCGATCTCTGAAGATATTGCTTAGCATTGGTGGCTGGACC
TATTCATCTAATTTCGCCCAACCAGCCTCAACGGAGAGCGGAAGGAGAAAGTTTGCAGAG
AGTGCAGTGGATTTGATAAGGAATTTGGGGTTCGATGGAATTGATATCGACTGGGAATAC
CCCAAAAACGCCGAAGAAGCACGAGATTACGTTCTTTTGTTGAGAGAATGTAGGGAAGCC
ATGGATCGTTACTCTAACACTCTTCCTACACCTCACCACTTCGAACTTACGGTAGCATGT
CCGGCCGGTCCTCAAAATTACAATAACATGGATATTTACGGCATGAACCAATACCTCGAC
TTCTGGAACCTAATGGCATACGACTATGCGGGATCGTGGGATGGTGTTGCAGGACACCAA
GCAAATGTGCTTGCTAGCCACAATAACCCAAGCTCCACGCCGTATAATACGGAACATGCA
GTCAGGGCATATGAGGCGAAAGGAGTACGTAGCCATAAAATTGTACTTGGGATGCCGATT
TATGGAAGAGCCTTTCAGGGAACTGAGGGATTGGGACGACCGTTCAACGGGGTGGGAGAG
GGTACTTGGGAAAATGGCGTGCATGACTTCAAAAAGTTACCCCAGGAAGGTGCGAGAGAG
TTTGTGGATGAGGAAACCTGTGCTAGTTATTGTGAGTTGGTTCTTTTCATTTCCCCGCTT
TTCTAGTATTTGATGCCCTTTCTTGAGTTTTGGAGGGAAAACAAAGTTTTGCGATAGCAC
TATGAGTGGATGTTTCGATACGACAGGATAGGATTGAAACGCTAATGGGCCATAAAGCAT
ACAACGAAAATACCAAAACCCTTATATCGTATGACACAGTCGAGGTCGGTCGCAGAAAGG
CTCACTACATCAAGCAAAGAGGCCTTGGTGGTGCCATGGTATGCTTTGTCCCTAATCCGC
TTCCATCATGCGACTAACCCAAACGAAACAGTGGTGGGAATCTTCGGCCGATCATCCAGA
GCCAGAAAGGTCTCTAATTCACAACGTGGTCAACGTTTTGGGTATCTTGGAGGAAAGCCC
GAATTGTATTCAGTACCCGGGTAGTAAGTATGAGAATTTGAGGAACGGGTTTTAGCATGG
GTGAGTGTAATAGTTCAAGAAACGCGATCAAATGGAAATAAGAAGAGTAATTGATCGGGC
GTTGGAAACGGGTTATTTCAAAACATCGGCATACAATGGAAATTGTCTCTGAACATTGAA
TCTTTATATCACCAAAAAACTATGGTGAATAAGGGGTCCATTCTTTTAGTGCATGTGTAC
TTATATTTTTAACATTTGAACTCAAAAGATACAAGATCCTTAGCGGTCTTTCGTCTGAGA
ACATGCTGCCTCCACATAGGCCCACATGCAATTACATTACCCATATCAGTATCACTCTTG
GTCAC
>85a67274-06f8-44be-b2f9-cc3e23fc6549 (mRNA) 1359 residues [Bfab07:70539-71897 - strand] [genomic] name=Bfab07g00170.1
CGAACAAAACCTCATAGAATATCATCATCGTCTCTTCATTTTCCCAATCGAAATGGTCAA
GTTGTGCCAGTATTCATACTGGCTATTTGCATGAATTACAGTATGCTCAAGAAGTCGGGA
ATTTTGATTTCATCGTGCAGCAATTTGCAATGCTATTATGCATTTCCCCGAACATCATCG
ACGTCACTATCTCATTCCCTCTTCACATCCCGAAACCATCAACCACAACATCGCTCACAA
CGACAACACTATGCCATAGTGTCCGACGGCAGAAGTACAAATCAACATGGAGGATTACAA
TGGCCTGAAATGACATCCGCGTATGCGGTTCCAACACCCTACCAAATCTTCAATCAAAAG
AAAGGATCTCCATATTCTAAACGACGTTTTTACGAATTGGTTAAACTTTATCATCCAGAT
AAACATGGCATCGATACAAGTGATGGATTGGATTACGATACGAAACTATCGCGATACAGA
TTAATCATTGCAGCCAACGACATACTTTCAGATCCCGTCAAACGAAGTGCATACGATACA
TATGGAGCAGGTTGGAACGGACGACCCGAAGTCCTCGACCCCCGCGATAAACATGGTGAT
AATCACGGGTGGGCAGGCCCGGGTGGCCCAAGTCAAAATGCTACATGGGAAGATTGGGAG
AAATGGTATAGCCGCGATGTCAAGGGAGAACAGAAACCCCAGTTCGTATCAAATGGTGCA
TTTGTCTTGTTGATTGCAATTTTTGTTGCGGTAGGAGGATTGGGACAATTAACGAGGCTG
GATAATTATTCGGCAAAATTCTTGGAACAGAGAGATACATTACATGACAAAATGAGTAAG
GATTTGAGGCAGAGAAGGAAAGAGACGAGATACACTTTTGGGAGTAGAGAGGAGAGAATA
CATAGCTTCTTGAGACAGAGGCAGGACCCGAAGGAAGAAACCTATAGGAAATTGTTGCCG
AATCCAGAAGTTTGCTCAAGCGAAGATATCAAAGGGAGATCGATGGTGGTTTATCAGTCG
CCCAAGAATATGCCAAAGGAGCGATGAGATGGGAACATATGGTCACGGCAGGATAGAAGA
AATGGATACAGCAGCTTCAGCCACGATGCCCATCTGTGGCGCCACGAAAGCCAAGATACA
GTGGAGAGTAAATGTGGACTTATACGAGGCTGAGAGATATTTGTTCCCTTAGATGTTTGC
ATGTTAAGCGTTTGAGTTCTTATGTGAGCGGAACAGAGCAATGGGGTGGCATCCACTTGC
GCGTATTCCGGACGAATCTAGCTTTACCAACCTAATTATCACTCGCAGCAAGACTAAAGT
GGTTGAGCCAGAAACCACAGATGTACAGAATCAATCAAT
>e65f90ae-9b84-42f9-ae06-35240aef7c69 (mRNA) 4375 residues [Bfab07:77639-82013 + strand] [genomic] name=Bfab07g00180.1
AAACATCCCAATTCACCAATCCGCCAATTCGCCAATCATTGACTTCTGATCTTTCACCTC
ACCCACTTCCCTCACCTCACTCTCCTCACTTGCTGAATCTACTCCGACGACATCTTTGCA
CGCTTTGCACGCTCTGCAACATTATCGCGACGTCGTATGGATATCCAGATCGTGAATCAA
TTCGCCGATATTGTTTGAATCAACCAATATCCCGAATACAAACCTCGCCCCTTCATTTAC
TTATCTGTACGAAGCGCAACGCAACACAACACAACACTACCCACCTATCCATCCATCCAT
CCATCGTATCGCAGTCAATCACCACCCAATTTTCGACCGACATTAGCATACTTCCATCAT
TTCTATCCTCTTGCATGCGGAACCTTTTCTCTTTGGGCGACAACGCAACCCATCATCACA
TTACACAGTCATCGGCGCCGCATGCGAATATTTCAACAATTTGTTCCCATTTGAATCATT
CATGTCAGCATTCACCTGAGGGATTGTTTTGTTCTATTTTCCAGAAAAAAAAAAGATTTT
CATCAAATAATTCGGGGTGAAGACCCGAGCGGCTCGCTGGTCGATCTACAAGCCCTCCTT
CGCAATTCCAAAATTTCAACAAAGCCTGTGTGTGCTTGCTCCCTCCACACCATACGATCG
CATCCAATTCACTCTCATTTTCGTTTTTACTCAACCATACGATAATATCTTTCCTTCTTT
CTCGCAGAACTTTGCTCAATTATTCCAACTATAGTCTGATCTTTCGAATCTTCTTAAAAG
TACATACATACACACATATCACCACCCGCTCCAGGCATCTTACAATAATTTCGAATCCCT
CTCCAATCCATCTGTCTGTCCATCCATCTCCCTTTCTCAACCAACCAAAGAAAAGAGATC
GACAATTCTCCTTGTTCTTTCTTGCGCAACACACCACGGTGTATCAAAGACCCCATTGAA
GGTGTTGCAAAAGATATTGGCACTTCAATTTAATTTATAGAAAATCCGACTTGTTCGGTC
AACCAACAATATGAGTGTAATGCTTCAAACCCCTTCCCGGGCGTCAACAGCCTCATCTTC
TTCCTTCCAACCAGTTTCTCGACAAAATACCATGTCTTCACACGATGGGGCTCGCTCTGC
CCGTCAATCAAAGAGATATTCTATGACTACCCTGTATCTTTCCATGTCTGCGAATGAGAA
GGATTTGGAAATCGAGGATGATCTTGCGAAAGGTAAAATTTCTGGTGCAATTGGAATTGG
CTTGAATGTTGTACTAATGAATTGATGTAGCACAAAAGGTTCTACGAGAGCTCAAATCGA
AGATTTCATCACAGTCGAAGAAGAATTTCGTGTTGGAGAAAGACGTTAGGTATTTGGACT
CGAGAATCGCATTATTGATTCAGAATCGCATGGCTTTGGAAGAGGTAGGAACCTAAGCTT
TCCAGGACAAGTTTCGCAACTAATATCCCTTTCAGCAAAATGAGGTAGCTAGTCATTTGG
AAGATGCGACCGACTTGCAAGAAGGTTTCTTCCCAAATGATGAGAAGACGCAAAAATATG
GCAATCTTTTATTCTTGCTTCAATCAGAGCCCAGGCACATTGCACATTTGTGCCGCCTGG
TCACCATGGCAGAGATCGATTCTTTACTGCAGACAGTCATGTTCACAATTTATGGAAATC
AATATGAGAGCCGTGAAGAACATCTTCTTCTGACTATGTTTCAGGTAAGTCTCACCCTTG
CGAATTGAGCTGCTTCCAATACTAACACTTGCCTTGTAGTCTGTCTTAACATACCAATTT
GATAACACGCCAGAATATTCCTCCCTCCTCCGTGCGAACACCCCAGTATCGCGTATGATG
ACGACGTATACCAGAAGAGGTCCTGGGCAAAGTTACTTGAAGACTGTATTGGCAGACAGA
ATAAATGGGCTTATCGAGCTGAAGGATCTTGACTTGGAGATCAATCCCCTCAAGGTCTAT
GAAACAATGATTGCACAGATTGAGCTGGAGACGGGAGGACTCCCGGCCTCCCTACCCAGG
GGAGTAACAGCAGAGCAAGCGGCAGATAATACACAGGTCCAGGCCATTATCGAACCGCGA
TTAACAATGCTTATGGAGATCGCAAATGGATTCCTTACAACAATTATCGACGGGTTAGAG
GAAACACCGTACGGTATTCGATGGATCTGCAAACAAATTCGAAGCCTGACAAAGAGAAAG
TACCCTGATGCCAACGACCAAGTGATTTGTACACTTATCGGAGGGTTCTTCTTCTTGCGA
TTTATCAACCCTGCTATTGTCACCCCTAAATCATATATGCTCATTGATGGAACTCCAGCC
GATCGACCTAGACGAACTTTGACCTTGATTGCTAAGATGCTTCAAAACCTTGCCAACAAA
CCCTCATATGCAAAGGAACCATATATGGCCAAACTTCAGCCGTTCATTCAACATAACAAA
GAACGAGTCAACAAGTTTATGCTTGATCTTTGTGAAGTTCAGGATTTTTATGAAAGTTTG
GAAATGGATAACTATGTAGCATTATCTAAGAAGGATTTGGAGCTATCAATTACCCTCAAT
GAAGTTTATGCTACGCATGCTCTACTCGATAAACACACGGCCGAACTCAACAGAGATGAG
AACTCGCATTTGGCAGTGATCTTGGCCGATTTAGGGCCAGCCCCTGCACAACTACCCAGA
AAAGACAACAGGGCTATCAACTTACCACTGTTCAGCAAATGGGAAACCGCGATCGATGAT
TTGACAGCTGCCCTCGACATTACCCAAGAGGAAGTATTCTTTATGGAGGCCAAGTCAACA
TTCGTTCAAATCATGAGATCGATTCCGAGCAACAGCGCTGTAGCGCGTAGGCCACTTCGT
CTTGAAAGAGTTGCTGATGCAGCAGGTCAATACCGAAATGATGCTGTCATGGTACGCAAA
GGTATTCGGGCGATGGAATTATTGAGCCAGCTGCAGGAATTGGGGGTCATTGACAAATCA
GATCAGTTCAGCCTCTTGCGGGACGAGGTTGAACAAGAACTTCAACATCTTGGATCACTT
AAAGACGGAGTTATTCTCGAAACTCAAAAACTCGATCAAGTTTTCAAGACCATTCGAGAC
CACAACACTTATCTAGTCGGTCAACTCGAAACTTACAAAAGTTATCTGCACAATGTTCGG
AGCCAAAGTGAAGGAACCAAGCGAAAACAACAAAAGCACCAAGTCTTGGGTCCGTATAAA
TTCACTCACGGCGAATTAGAGAAACAAGGCGTGATTCAGAAGAGCAACGTACCCGACAAC
AGAAGAGCCAATATCTACTTCAACTTTACCAGTCCTTTGCCCGGAACCTTTGTCATTTCG
TTACATTACAAAGGTATGAAATTCTGGGATATTCATCACTACCTTTATGAATAAATGCTA
ACTTTACCAGGGCGAAATCGCGGTTTACTGGAGCTTGATCTGAAACTTGATGACTTACTC
GAGATGCAGAAGGATAATCAAGAAGATCTTGACCTGGAGTACGTTCAGTTCAACGTGCCA
AAGGTTCTTGCTCTCTTGAATAAACGTTTCGCTAGGAAGAAAGGATGGTAAAAGCGCAAC
CACCCCCGCATCCTCATAATCAAGGATACATTTCCTTCTATGGAAATACCTGCTTCCGGC
TACTGGCTCGGTCGCAGGCTGTATGAATATTCTTAAGTTGTTCAAGTCACCGATAGTGTT
GGATGGTGAATCATCGGAGTTGTGTTTTTTGATCTCGATATACCTGGTGGCATGGTTTTG
ATGGCGTATATGGCAATTTTCCGATATTGTGCAGACGGAAGCTTTATACCTTTTTTCTTT
GTTCAATTTCTCTTGATATATCTTGTTTTAATGGGTGGTAGTTGTGATGTTTCTTGCGTT
CTTCGTCTTTCTTTCTTTAGTTCATTTATGGGTGCCTTCTTCGGTACGACGAGCAAATCA
GTTGGAGCGAGATGCTGAAGATGTTTGGTCTGGCTGGTCCGGAGAAGTGACATGACAGGA
TTTTGCATTATTCAAAGGGGATACGAGTCAAGGGAGATCCTCTATCTTGATATGATATTT
ATTGAAGACATGAGGTTGGGATTGGGAATGGAAAGGAAGATCGGGAATTTACTGGGTGAT
TGTCTATTATGGCTCCCGTCTTTCCTCTTGCCTGCGGGGAACTTGGAATGGACGGCTGTA
CGGATGGGTAGGATCTCTTTTGGTAACGGCAATGCAAGCAAATGCGAATGCGAATGCACA
CAATAAGATATGGATATATGATTGTGTAATAGGCGCGTCAGGTCTCGTACGAGAAGAGCG
CATACTAGTAGGACGAGACAAATATCAAATGTAATATCATGAATGAAGAATAATA
>417d6c7b-5e7d-4547-acf2-45636d0ef375 (mRNA) 838 residues [Bfab07:82142-82979 - strand] [genomic] name=Bfab07g00185.1
CCAGAAGGAGATTACGCAAACGAAGAGATAAGCCTGAGGCTTAGTGAGATTTTGAAAGAC
ATGAGTCAGGAAATGCTGCAGATCAAAAGGACTTTTGTGAGATGACCCGGGTACGAAGGG
AATGGTGCAGAGAGCATAGTACATGTCATCTGTTGATACTTCTGTCAAACCTCAATACAC
TTCCAACCCCTGTGACAGAGATGAGAGCTTCTTTGAGGTCAGGAACTTCATCAAAAATTG
CAGTCGTTCATAAGTCTCGGGCTGAGCTTTCCAACGCCTCGAGAGTCACAATAAATGCCA
CATATGAAGCTGGTGATCTCCTGTCAAGCAAGACTACCAGTTCGACTGTTGTAACAGGAG
CTTTGATCGGGTTAAGCACCAATCTCGAATCAATAGTAAGCCCAAGTTCCAACTCGGCAC
CTTCGATTAGCTCAAAATCGCCGCACCCAAGCCCCTTATACGAGTGCTGCTTACAAGAAC
TCCCTACTACAATCCTTATCTCACCCGATGACTCCGTGGAGACGATTATCCTCTCCATCG
GTAAAGTAGAATACGTATTTGATATTCGCGACATGGACTTGAGATATCTCAATATCAAAC
CAACGAAAAAAACGATGTACCGAAAAGTAAGGAGCGATCGCAAAGTGAAGAATTAGCTGA
AGGAGACCATCAAGAACAAAGGCATATATATAGATGTCAGAGGTCCTGAACTTGATGGCG
AACTCGTACTCACAAAAAGAGATTCGGATTCAAAGGAAGTAGAGTTTTGTGTAAATGATG
GGGGAGAGTATAACAACGTGTGTCAGGATTGGATGGGGTGTAGAGGAGAGGTGATGGA
>cb150335-c1c3-4940-ab6e-098533742c36 (mRNA) 707 residues [Bfab07:83161-83867 - strand] [genomic] name=Bfab07g00190.1
TTTTTTCCCTCCTCATCCACTCGAATCTTGAAAAGACAAGACAAACACAAAAATCTCATC
GAATCCAGATACAAAATCTAGTTTACATCTCTAGATCATAAGTTCAAGAAGTCACCACAA
AACCACAAAGATGAATAATGGAAACCGCTCCGCAGTCACCTTTCACGACGACCAAGAACT
TTCGCTCACCAGCGTCGAACGGGGACCTTTATTCATCACTATCGATGGATACCGAGCTTT
CGACTATCCATCTGTCGTCGATGACGAGGACGACCCACCCATCGGAGACCCTGCCCTCGA
AGAACTCATCGTCGACGACCCACCAGCTGAAGTACCCCTTCTTCAACTCCGACCACATAC
ACAATCACAGTCATCTCGATACCCACATATCATCTTGTTGATCCAGATCATCGAATTGAT
TGCTTTGATCGGCATGGTTTTCTACCTCCTCTTCAATCATTTTCCTCCCAAACCCGTACC
CACTCCAACTAGACCGCCTCCCTCAACACCAGGCGGATGGTGAAGAGTCGAATCCTAATC
TAGTGCGTCTAGAGGGATGACTAATATAAGAATTGGAGAGGAAAGGGTGGGATGAAGGTT
TGTGGTAGAAGTGTTTGAGAGCTGAAAGGAAATGGCGTTGCTCCCCAAAGCATGTTTTGT
TTTGTAAGGCGTTCATAAATCGAGAAAATAGATAAAACGAAATATAA
>18db555d-1fc9-4f62-a3e0-b0b3e8462367 (mRNA) 1155 residues [Bfab07:84016-85170 + strand] [genomic] name=Bfab07g00200.1
ATGTTGAATTTTTCGGGGGCCATATTGTATAAACAAACACAGCAGAAGTAGATGCGGGAA
TCTTTTTCAATTACAACATAAGATTGGCTCCTCCATACTCATTACACATCAAATTATCAA
AAAGCAAAGGCTCCCATGTTCGCTTGTTCGCTCGACAAAGGAGCAATTTCATGCTGCTCT
GGCAAAACTCCACCGCTCACTCCAAGAAAATACTTTTTCGTGGAATGTTCACTGTTATTC
CAGAAACTACTACCTCTTCATACCAAATATTCTGACTTCCCCCCAAAAATCTACCACTAT
TATTACAGAAAGAAGAATTTCACGAGTTAACCAGGAAATCGACAAGATGCCTCGATTCAT
CAAGTTCCAAATTGACTGGGCCATCCATGCCAAGCTCAACAACGACATTCTAGAGCAGAG
TACTCACGGGAAGGGCGAAACACCAGAGGGTTGCACCTGTGATATCTGCTACGAGCGGTT
CTGCATTGCATCAGTTGATTCAGAAGATGCGGCAGAATGTTTACCGTACTTCCCCGTCAG
CAAAATCCTAGAGCCATCTCAGCTCTGCGATAGTGACTCCAAGGAAATCGAAGATATCTG
GGAGTTCCCAGATGTTGACAAATGCAAGTGCCACTGTCACCGCTGCCACATCCATCAATT
CAAGCTGTTCTGCAAAGAATACAAAGAGTTGGTCAAGGAATATTCGAAGCTCATGGTTGA
TTGGTGCTTAACTCTCAAATCTTCACAGCAGTTGCAGGACCTTCAAACTCTCAGAGAGCG
ACATCATCAATTCCGCAAGAGACTCAGCGACGCGGGATTTCGTCCCAGATCTCAAAGATG
CGGAAAAGTCGACTTCTCATCACTCAAACCAAGCGAAGGATGGTGCTAAACATCATACGA
ACTCCGAATCAAGCGACTTGAAAAGGGCGGAAGGTTGTTGTCGGCGGAGAATTTCTGGGA
ATGGGGTGACCCAAGCACTCACAAAATTTCAACTTCGACACAAAGTCAATCGAGTACCAC
ACCTTCCTTCTCAAAAGGCCACGCACGAGATTGTTTGTCAACCTTCCCTAGAACGCGATG
GCAACCGCCACAGGCCCACCGCAACTTATGCAAATTGGGTTATCGACGATTTAACCTTAA
CACGGAACAACAAAA
>56b2a126-e9ef-4770-9275-f5f34600a5fd (mRNA) 1904 residues [Bfab07:85330-87233 + strand] [genomic] name=Bfab07g00210.1
TAGATGGATTACGTCATGATTAACCTTGACCCTCTGAACCTCCTTCATCAAAGCAAAAAC
AACACTTTCAGATTGTATTGCATACGGATTGACCTTACATCTAAACAAGTCTACACATCA
AAAACAAGAACCTCCCCTTTTATATTCAACCTCTTCTGTGTATATTTCAAGCCCATCGAT
GCTTTTTGTTTTCCGTAATTCCGCTCGAAGAAGTCTTCCACACCATACCGCCTTTGCTAG
GCCTTGGATCAACAGTTTGCCTACAAGATTATCAGTACGCCACAGCCCTTCAAATCTCAC
TCTGTGTCTTCCTACAATGGACCGGGGAATCAAAAGAAAAGCCAAAACTACCTCAGAGTC
GCCAAAGAAGACCATCAAAATTGATGGTTACTGCAGTACACCCGTCCGTCGTGCTTCCAC
AGGCGAAGAAATTTGGCCAGCGCCACGTGACCAACTAGAATCTGCCTACAAATTCGTCCG
AGAATGCGCGACAGCCCAGAAACCCACTCTTATTGTGCCGGATAAAGACGCAGATGGATT
GAGTTCCGGGGTGATCATGTATCGTACTTTGATAAAACTCGGGCTTGAAGAGAAGAATTT
GAGTGTTCATTTAGTGCGGAAAGGTTCGAATATCCATGAAGAATACGAAAGAAAGGCAAT
GTCAGAGATGAAACCTAGCTATGTGATTGTTTTAGACCAAGGAAGTCGAGGTGGTCTACC
TGTCATTGATGATGAGGGTGCGAAATGTATGATTATTGATCATCATTTAAGTGATGACTT
TCCCAAAAATGCCACTGTAAGGTAGAAAATGTCCTTCTTCCGGCAACAATACTGATGTAC
AAGGGAAGGTTGTTTCAGGCTGCCATTGCCCTCCAATCCCAACGACAGCTCTCATGACCT
ACGAGATTTGCAAAGAACTTCATCCTGATATTGCTCAAGAATGTGGCTATCTTTGCGCAA
TAGGGACACACGGGGATCTGGGAAATACTATAAAATGGATACCCCCATTTCCAGATATGA
AAGAGACCTTCAAGACACATACTAAAAAGCTCATTAACGATTGTGTTTCTTTGATCAACG
CTCGTAGGTTCAATGAATTTTTAAACCCCAATTGCTGAACTTCCTATAGCAAGAAGAACT
GGTACTTATGATGTTATTACTGCCTGGAAAGCATTACTCGGAGCCGAGGATCCCAAAGAA
ATTATGACAGACCAGAGGCTCATCGAAGCGAGACGCGAGATCAATCAAGAAGTTGAAAAA
CGAACTCATACACCACCAAAATTTAGTAAAGATGGGAAAATTGCAGTATTGAAAATCGAG
AGCGAAGCTCAAGTCCACCCGGTTATTGCTACGCGATGGGTATGTATTGAGTCACTGGGA
TCAATTCATCTGACTAACAATTTTACAAAGGCCGGCTTCTTGAAATCTAAAACCCTTGAA
ATAGTCATGGTAGCCAATTATGGCTACCTGCGCGGCAAGGTGAATTTCTCATGTCGAGTT
GCTAGATGTGCTCGAGGCCGCGACCCGCCAGTCAATATCATCGAGTCACTAAAAGCAGTA
GCCAACTTGGATACTACAGATTTAGTTGAGAGACTTGGAGAGAATTTTGCTCGTGGCCAC
AAGGAGGCATCGGGTGGAATTGTCAATTCTGCCGAATTCGAAGAATTATGTGAGTTAATG
AAGGTTGGTGAAAAAGCCGAAAAGTCGGAGCAAGAGGCATCGACAAAGAAAGTTGGAAAG
TCGCCACAGAAAAACACGTTGAATAATTATTTCATGAAGTCTTGAAATGTTGATTCACAG
GTTCAATGAGAAGATAGATATGAGCAAAGTATTTATTCGAATGCAATTAAATAAGAAGCA
GTACCATCTGAGATTACAATTTTGGGTAAAATATTCGGGAATCT
>56b41cf1-0733-4b2f-bdc3-c6b878176edd (mRNA) 2411 residues [Bfab07:87167-89577 - strand] [genomic] name=Bfab07g00220.1
CTTGCTTACAACTGTCAACCCTTTGTGTTCTCTTTGATGAACTAACACATATAAAGAACC
TAACGAGGAACCAGATGCGGCCTTATTTGTGATCGAATTGAAAAATTCCTTTGTGGGAGG
AAATTATGAAAGCCCGAGATTTCTTTATGGTGAAGCAATTAAGATACCTAATTTTCAAGA
CTTGTAAAATATCAATTTGATCAAATTTATACTTTAAAAGTAGAATATCACATCACTCAT
CACTATTTCATCAAAATCAACTCGTTATGGCCAATGAATGGAAGTTCCGCTCTCGAATGC
CCACCACCTCCATTGCTCGAATATCGCAAGATCCTCCCATTCCACCCCAACACATCACCA
AGCGTAAGCGTATCACCCGCGTAATAACCACTGATGCATGCAAAGAGTCCGGCATTATCA
ACGAGCTGCGTAAGAAATATGAAATCGACCTCGAGCACCCCCCTTACTATCCTCCCAAGA
TCACGCTTCCTCAGCCACCTATTCCTCGCCCAGAACCTGATGTGTTGAATAGTAAAATAA
GAACTGAGATGGAAAGACGACAGTTCGAACCATTGACTCGCGATTGGGTTTGGAGGGTCC
TGTCAGAAATGTACAAAGTGGATGAGAAATTATGGGGAAAATGGGCAATTGATTTGGATG
GTGTAAAATTGGCTAAAGGCGATTGGAGATATCTATTGAAGTCTCATTTTAATTCATGGT
GCGAGAACGGGATGATGGAAGAGCAAGAGCTTGGCCATGTGACGAACACTATTGCCGATT
TAGTAAGTTGACTTTCATAAGTCTTTCCCGGCTGGTCAGGTTTATATCCTTTACTTGAGT
TGGGTTCGAATATCTGGAGACTGTTACTGATCTGTCGACTACTTTTAGTATGTTTACCTG
GCTTGCGACTATAGGAACAGAGCAATAGCAAGAACACTCAAAGGTGGCGACCTAGCCGGT
GATACACCAACGAAACAAAAAATCAGTGCTATAATCATTGATTCCGACAAGTTGTACTGG
GATCAAGATAAAGGCCGCGTTTTTCAGCAAGGAGTTGATGAGGACGGGGAGCCTATTATG
CGGATTAGGCAGCAAGACTTTCCCAAAGCCTGGGAGAAAACCATGAAGGAACTGGCACAA
TATGATGACGAAACTATTGCAAACCTCGACTATATTGTGATTCCACACGAATATGGCGCC
TTCCACACACAATGTATCGGAATAGCACCAAAGCAAAGGTTTATCTTCCATATCGACAAC
TCCGGTCTGTCGAGAGCCAAATTTGCAAATACATTAGAAGACAATTTCGGATCTTACTAT
CATTCGTTTTTTCAAATGTGTTTACTCGAAGCTATTATATACACAAGATTCGAGAAAGGA
GAGATTGATACTGCTGAGTGGCCATTATTCGGGCAATGGTCCTACCGCACGGATCATCAA
ACGGTAGAATACAGAACGACAGACAATAGTCCCAACGCAACTCGACAGAATGATTCATAC
AACTGCGCTTTAAATACCATGACCAGTGCCGTGAATTTGTTATTTGGATATGATATGTCT
TGTTATGCATCTGGAAAGGATCTCTCCCCCGTCCCTGGATTAACAGGAAAGAGAATACGA
GTGGCAGCGGAATTCCTAAATGGGGGATTCAATTACCCATTCAATTATCCATTGTTCAAG
ATCCCAACGGGGTTACAAGAGCTCATCATTGATGAAACTTATAAGCAAAATATTCGACCC
GCTCCTCCGACCGTGCAGGCAAAGAGAGACACAGACGGCACAATCATAGACGTATACGAT
GGTGACGATACAGATGAAAAGGCGGACCTGGATACAGAAGAGGGAGAAGAGGGAGACGAG
GAAGAAGAGGGAGACCCCCAAGCAGGAGCTCGAACAAAAGTTAAAAAGTCCACGCGTTAC
AGAAAGGTCAAATGGCGTGGCCAACCCGCTCTGGATTGGGATCCTGTAGAGCCAGATCCG
TCAGGACCAGGATCTACAGACGACGATTTACCAATACGAACTCTTTGGCCTGTTCAGATG
GATCCTACTAGAACGGGAAAATGCGGCATTATATACCCGATCACAAACCCACGCTTCTCG
AATCCAATATATGATGATGTGTTTGAGTGCAAGAGGGCAGCCCAATTCAATAAAATGGAG
GGCTGGGAAATGTGGGAGGATATGCCGTTATATTTGTTTAAGCGTTGGATGGAAAATGTA
ATGGCAGGTAGAGAACATGAAGAGTTGGCTCCATGGGTGAAAGTGCTCAAGCTTGATGCA
CCTATTTTCTCCGAGACAAAATATTGAGGCACGAAAGCGAAGATGCTCAACAAGACTTAT
CGACAGATTCCCGAATATTTTACCCAAAATTGTAATCTCAGATGGTACTGCTTCTTATTT
AATTGCATTCG
>c292fae4-b912-4d9d-8765-7bf834435e8e (mRNA) 5015 residues [Bfab07:90758-95772 - strand] [genomic] name=Bfab07g00230.1
TGTCTAGATGCTTGCCGAGGTTCAAGGCAACGGATTAGCGGATCCTCGAATGTTTAGTGG
CTCATGTGCATGATTGCTTCAGCTCAATACCCTCCCCATGTATGCTTTTTACGGCTTGCT
CCACCATGGATAAGATCCTCATCAGCAAGTGGCTGGTCAAGGCAAGGCATGCTTTTCTCC
ATGGACGATAGATCGGCTTTATGTCAAGGTCACTTCTTATCGGCGATGGGCATCTCAAAT
TTCTAACCAGGCCTATCTACCCCGCACATCATCGTGACAAGGGAGTATAGCATGGAAGAA
TACCAGGTCTATCGAGATGATGACGCTCAAGCAGATTTGAGAAGTTGAGGTCATCTACCA
AAAAGTTATATAAGGAGGTTCTTTACCGAATTCCTCTCCAAGCAAACATCCTAGATGCTT
CACCACGAGAGAGAAGAGCAAACCCTCAATATGGGAGACTCAAGCGTGATTTCAGGCCAA
AGCAGAGGTTATCGCCTGGGTGTTGATGTTGGGGTATGTGGACATATGCTCAACAACTCC
AGGCATATGTCGCAGCTGACAATTGGTTTTAGGGGACGTTCACCGATGTTTGCGTTTTTA
CACCAGAGGGCGATGCAATACGGACCAAGGTACCATCAACTAGCCGAGATCAAAGCATCG
GCGTTAAGAATGGTATTGTGCAAGTGCGAGAGAAATTGAAGGCTTTGTACAACTGGGATG
GTCAATTCGATGGCATTCATCACGGTACTACTGTTGGTATAGGCCTATTACCTTTCTATG
GCGCTTCAATGATATTTTCTAATTTTCTTACCAGGAACAAATGCAGTTCTCGAAGGCAAA
GGTGCAAAGGCTGGATTGATTGTCACAGCTGGTCATAAAGATATTCTGGCTGTACGGAGA
TCTCAGATACCAGGTGGTCTGGGAGCTTGGATTAATTTCATGCCACCTGATCCTATAGTT
CCTCTTGAATGTACAGTGCAATGCAAAGGAACTATGAGCTATGATGGTCAGATTGTTACA
TCAATCGATGAATATTCACTTCGCAAAGATCTTACACGCCTCAAGGAACGAGGCCTCGAA
GCTATCACAATTAGTCTACTCAATTCTTACCAAAACAACACACACGAGAAGCAGGTGGCA
AAGATTGCAATGGAGATTTTCGGTCCTGATGTTGAGATAATTTGTTCAAGTGATGTACTA
TCAGAGATGGGAGAATACGAGCGTACTGTGACAGCAAGTGCTAATGCTCTCGTCAAGCCA
GTAGTCAAGAAGTATTTAGCTAACCTCCAAACTCTTCTTACTAATGATAGCGAGACCATT
AGAATCTTGAAAAGTGATGGCGGTCTTACCACGTTAGACTTGGCCGGCGATCTACCTGTC
AGCATCTTAATGTCTGGACCAGCAGGTGGTGTCCGAGGCGTTGCAGATATCGTGGCTAAG
AAAACCAAATATCGAAATCTAATAACATTAGATATGGGTGGTACCTCAACCGACTGTGCA
CTCATTTATGATGGCACTCCTGCGATTAGAAGAGAGACGGTTGTTGACAATCTGACAGTA
AGAGCTCCATCAGTGGATGTCAAGTAAGTCTCATCTTATCCGCCTTGCCATGATGGCTTT
TAATTGATCATCAACAGAACTGTTGGTGCAGGTGGTGGATCAATAGCACAATACGTTGAA
TTAACATCTACAATGCGCGTAGGTCCAGAATCTTCTGGAGCCGATCCTGGGCCTGCTTGC
TATGGTAAAGGCGGGAATGAAGCGACTGTAACTGACGCAAATGTCGTACTCGGCTATCTT
CCAGATAAACTTCTCGGTGGCGATTTTCCACTAGATATTGCAGCTGCCAGGATTGCGGTC
GAAAAAATTGCCAAGCAGATGGGTCTTTCGATAGATGAAACTGCTCAAGGTATCTATAAC
TTGGTCAACGAAAAGATGTACAACGCTTTACGCAATGTTTCCGTTGAACAAGGTTATAAT
CCCGAAGACTTCTCACTCGTTGCGTTTGGTGGAGCCGGTCCTCTGCATGCGAATGCAGTG
GGAAAACTACTCGGAGCTTGGCCAGTTATTGTTCCAATCGCTCCAGGTGTGTTATGTGCA
CAAGGCGATGCTATGACGAAGTTGAGCCATGAACAGTCCATATCTTACATCAAAATTCTT
ACAGATGCCACAAAAAGTGGTATCTTTGATGCTCTATCTGAATTAAAGACAAGCTGTCAA
GATGTAGTTCTTAGAGCACTAAACCAGCCAAGCTCTCTTAAAGTCGATTACGAAGCAGAT
CTCAGATACAAAGGTCAGGCTCTGACAATGTCTATCCCACTTCTCGTCGAAGATTTCGGA
CTTGATTCATTAAACTTTATTGAAACGATTAAAGAACGATTTCACGCAGCTCATGAACAG
CAGTATAGCTTCTGTCTTCCTGATTTTGAACTGGAAATCATGCGACTCGGTGCAATTGTT
ACAGATGATTCCGCGGACGTAGAGCTCAATTCTATCGGAATAGCTCCTCTTGACAGCATT
CTCACACCTCCACAGGATGCTATCATTAGTCGAAAAATTATTAGTACCGATGGGAAAAGA
ATGGAAGCGATATTTTGGGACAGATCAAAGATCACAAAAGCTGGATATAAGGTTCAAGGA
CCTTGTGTGATATCCGAAATGGATTCCAATACTCTCGTACTTCCAGGTTTTTATGGCGAA
ATTGATTCATATGGAAACATCCTCATCTTTCCAGACGATGATACAAAATTTACTTCTAAT
ATTGCCCATCATGATTGGGAAAGCGCTCAAAATCTTGTTCAAAAGTCACCATTGATTCCA
ACTTTGATCTCCTCTTCATTGCAGTCAATTAGGAATGAAATGGATACTCTTATGCTAAGG
TGTAGTATGTCACCTGCCATTCGAGATCAACAAGATGAATTTAATGTCATCACGAATAAA
AAGGGCCAGATGTTAGTGGGTCAATTTGGTAGCTTTATTACTCAGTTCCTGCAATCGTGG
AAAGGGACTATTGAGGAGGGTGATGTTTTCGTCACAAATGATGTTTATGAAACCAGTGGT
GCTATAAGTCATCTCAATGATGTGATCGTACTTCTTCCAATCCATTACAAAGGGGATCTC
GTGGGATGGGCGGCAAACTTTGGACATATGACGTATGTTGTTTTTCGTTCTTTTAATGTC
ATGAACTAATCGATGATGAATAGTGATGTCGGAGGCATGGTACCAGGAAGTATGTCTATT
AACTCGACCTCTATCTTTGAAGATGGAATACAGATACCCGCCGTAAAGCTTTATTCTCGG
GGTGTATATAATGCAGCGATGGTCGAAGTATTTTGTCGGAATTCTCGTCAACCGGATTGG
TTTCGTAGCGATTTGACAGCCCTTGTAGCTGCTTGTAGAACGGCATCTACTAGAATCTGT
GAGCTTAACGAAAGATTCGGTCCCAAGTAAGTCATATAGATCACAAATTTACCACAGTAT
GACTGATTTCTACTTCTAGCGTGTATAGTGCCTCTTGCGACGAACTTCTTGCACGAAACC
GTTCAGGCATCATGAAACTCATCGAGACTCAGATCGGTGACGAGGAAACCACATTCACTG
ATTTTATTGACGATGATGGTCAAGGTATTGGACCTTATGCAATCACCTGTTCCATGAGAA
AAACAAACGGAAAACTGGTCTTTGACTTCAATGGTACTTCACCACAAGCTGAAACAGCTA
TTAATTTCTATCTCTCCGTCACTATGTTCAAGATGTTTGTTGGGTGCTACTTACTCGCAG
TATTTGATCCATATTGTGTTGTCAATGATGGATTTCATGATATGCTTGAAGTCATCATAC
CAGAAGGAACTATACTTCGTCCCGTGCGCCCAGCCCCTCTTAGCTGTCGAACTCACCTTC
TAGGCCGCACAATGGATATCATTCAGGCTCTCATGGGCCAGCGGTCGCCTCAATATAGTG
CTGCGGCTGGATTTTCCGACTCTCCGCATTTTTTCTACTCCGGGTTCAAGCCTAATGGTG
AATGGTATCAACTCTACCAAATTGGCTTTGGAGGTGTTCCAGCCCGTCCCATTGGTGATG
GTCCAGATTGTCATTGCTTGTTTCCAGCCATCAAATCTGTGCCCGCTGAGGCTATTGAGC
TTAACTTCCCATTGCGTATTGAAGCCAATGAATCACTTGCCGATACTGGAGGCGCAGGAT
TCTATCGTGGTGGTAATGCACAAAGAACTTTGTACCGATTTTTGGCAAAAGGGGAATTTA
GTGTTCATGATGATAGATGGTTCACCAAACCGTGGGGAATTAATGGAGGGAAACCAGGTA
TGAGATCTTGGAAGAAACTGTATTCGTTGAACGGAGAGGAGAAAATTCTACAAAGCAAAT
GTGATCATGTAAAGGTAGTTCCCGGGGATTTGTTAGAGTGGGTTACTTGGGGAGGGGGTG
GGCTAGGGGATCCATTAACAAGACCGGCTGAGAAAGTTGCATTGGAGGTGGAGAGGAAAT
TGGTTACAGTTAATGGGGCTAAAAGAAAATATGGAGTGGTAGTCAATGAGGATGATTTCT
CGGTCAATAAGGAGGAAACAGAAAGTTTGAGAAAAAAGATGAAGAAATTGAATGAGGGAG
AAGGGGCAGTTTACAATAGAGGTGGTACTTTAGAGGAATTGAGAGAACGATGTGAGGAGG
AGACAGGATTGAAAGCTCCTATTCCACAATGGGAAAATGATCCATACGGACCACATACGG
GACTGGAGTATGTGCAAGAATGGTTCAAGGAGAAGAGGGAGATTAGAGGTTGGAAGTTGC
AGTGACGAAACTCGGTGGACTGTCTCCCTACTACTGCTATAATTATTCCAATCCAAGTTA
ATCATATTACGTATATTAAGTCTAATGTCTCACGTCTACATACAGCCTGTGCATAGAACT
ACTTTACATGAAAGAAAATCTTAGTGTTACTCCACATAAGAATGTGAGATATGCCTAAGC
CAGACGTGCTTCATGCATCACTACTCTCCTATTTG
>dccd0ad0-adf8-4b86-9082-e09866efa78d (mRNA) 1106 residues [Bfab07:96094-97199 + strand] [genomic] name=Bfab07g00240.1
ACCTACCCCTGAAAATGTCGATAGGCTCGATAAGCCTTATCCGCAAGCTTACCAATAGCA
CTGCTCCACCATTTCGTCACACCACATCACAGTTCTCTCTCTGAGTTTTCTCCATTAGAC
GTCTTTCTCCTTCCTCCTCCCACTATACGGATCTCTAACAAAATGGGACTTATCCGCAGC
ACCTTCACCACCGCCCTTCTCGGCGCCGCAGGTGCCACATCTGGCTGGGCCTTTTGGACG
CGCAATTCCAGATTCATCCCTGTCTCCCCGTCGGATCCGATATTTTCAAGTGCAGCCTAC
GTGCGACAAAACCCCAATCGCAATCCTGCTACGCAAGATTTATGTCAAAGAAAAGTGCCG
CTGAGTAAGATAAAGCCGCATTTGTTAGAGAAGGAGGGAAAATTGGTTGAGGCTTTTTGT
GCTGGAGTTTGGAGTGGTTTGGGTATGTACTTTTCGTTGTGTTCTTGAAGAGGTTGTCGG
CGCTGCTTGGTGGTTAAGCAGGAAGATAAGGAGATGGAAGTAGTGTATGAAAAGAACTAA
TGCAATTGGTGACAATAGGCTATTCTTACCAACGTTCCTACCTTTCAAAAAAATACCAAA
ATACGACTACCACCTCTCACCAACTCTGGGAACCTTCACAACTCCTCTCCTCCACTTATG
AAGTCGGAACTCAAATAACCGACCATTTTGAAGTCGTTTCCAAAACGCCAAGTTCAATCA
TCGTCCGCTGCGGAGATTCGCCTTTAGTAACCGGGGTAAGGGACAGCGATGGACTTTTTG
AGATGAAGGCTAGTGTTGATAAGAGTGAGGGAGTTGCAGTCTTCGAGCTGAAGAGTGTGT
TCTTTAAGGGAACCGGAAAAAGTACTAAGAAACCTATGCCGGAATATGTAGAATTTGCGC
ATAGACTGTACACGAAGTTATGGATGGAAACAGCCGTGAAAAATTGTGTTATGTAAGAAG
GGACTGGTTGTGTGATATACCTAGGTAAAATGAAATCAAGCGTAATATATTTATACACAT
TGATGGGATAGATAGAGCTCATATGATCAGCTTTGAAAAGCAGGATTTTTGAGTGTAAAC
AGCAGGACTAACTAAACTTCATTGCG
>99d66bb2-5b71-41b5-a2c1-768994a8845b (mRNA) 1369 residues [Bfab07:97262-98630 - strand] [genomic] name=Bfab07g00250.1
CTTCGCGAGTAGACACCAGCAAGTGACTATTCAATTATATAACAACCTTCGAGGCCAGTT
TTCTCCTCAGAGTTAGATTATTACCATATATTTGTACTCAATCGACTCCTAAGTAGTGTC
CTGTGATATTTGGCATCTCATTTCCTTATCCTTTCGCCATCACGATGACTGGAAAATTTA
CACTCAAAGATCCGGCTCGTTGTGCCCACTATGCTCGATTCTTTCAAAGTTTAACATTGG
CCGAAGCGAATATCATATACTGGTCTTTGTTTGTATTCGTTCTTATTTTGATGAGTATAT
CGTCTATTCAACACCACAAGTAAGTAGTTGCCACCATGAGTTCACGCCTCTCTCCACGTT
CCCCACAAATTCCCCGACCTGTCAGTCTAACAAACCCCAGATCAAATAACCTGACCGAAC
TCCTGAAAAGTGACTCCACTTCTCGCCAAATTCGTCGCATTCGTCGTCGCCGCATACATT
ACCTATCGATAGTCTCTCTTTGTTTCATGATCGCTCTTATTTGTATCGTTCTTGAGGTAT
TCGCCGCCTTCAATATCGAATACTGTGACGGCGAAGATCTAATTCAACTCTACTGGGGGT
TTTGGTCAATTCTTCAAGTCGGTTCCCTCATCGCTATTCTAGGAGTCATGCTGCAATTCT
GGATTGTTCTTGGGAACGTTCAAACACCGAGTTGGGCAGTGGCTCTGGGGACTCCTGTGT
TGGTTTTCGCTGCGTTGGGGTACATCTTCAGACATATTGGAAAAAGCTGGAGGTGGGGAA
GAGGGAAAAATCAGGAAGAGGATGTGGATGTCGAGGGTGGTAGAAGTGAAGAAAGCGAGG
CTGAGAATGAGGAAGGAGAGAAGAGGCGCAGTTGGGCTGAGAGGTGGATCACTTGGGCAC
CTGAGGATCAAGAAATCAGAGATAGAAGAGAAGAGGATTTGAGTAAAGTGAGGACCATGA
GGTCGGCTGAATGTTCGGACATGGAGTTTGCTAGTAGAGCGTAAGTAAAACCTCTCTCCT
TCGATGGTAGTGAATTGAGAGGTCATAAATACTAACACACAGCAGAACAACATTATACAC
ACCAGGGCAGCCAGGCGATGTCAGAAGGAGCTCGACATATTGAGCTATAGCTGGATGATG
ATGATGATGATGATGATTGAAATATGTTAAATTATGTTTGATGATGATACACACATGCTC
AAGTGCTGAGCTCAGGATGGATGGATAAACGGATACCAAAGGAAATACGGAGTTTGTTAA
AGTTTGGCTCAAGAATTGGCATTTAGAAAGATAGATTTTGAATTTTGATATGATATCAAG
AAAAACATTATGATGAAATGAGTACAACATGGATATTGGATAGCTAAGC
>0935ca95-2cbd-498a-896d-9bb2f52b4924 (mRNA) 2916 residues [Bfab07:103568-106483 + strand] [genomic] name=Bfab07g00260.1
GAGTTTGTGGTTTTTCTCTGCTTTTTGGATCACTTTTCTGGTGAGAGAGAGAGAAGAGAA
TAAGGATAGAAGAGCATGATCCACTACCATTACAGATGATTGGTCCAAGTGGCAACCAAT
CATTAGGATCGTAGAGTGTTGGCCTCGAGTCCAAGGTTTTGAGCAGAAAATTCCGAGGTT
GGTGAGATGGATGTGGGTAGATGTGGATGATGATTGAGGAAGGGAGTGACAGCAGAACTG
AAGGCATTCCGTAGTTCGGAATTCATTTTCTTTTGCTTATTGGATCCTTGATCCACGGAG
ATGGGATGCATTTGCATTTTCTATTACGAATTTGTGTTGATCTGTAAATGCACTCGATTG
AATCTGTTGTTTTTCTGAGTTGATCAAAGCATAGCGTCGGTTTGTTCATTCAGCTCTTTC
GTCTTTGGCCATCACTACATCATTACGATGTGTGTAGATGATCAGTTTCATTCATGATGA
TGTCGATATGTTTGTATCGTAACAATTACTTTCATCTATTATTCATACTTGTCTTGTCGT
ATCTATATGGCATCAAGTTTGCATTGTGTAACGTTTGATGAGGGTGTTAATCTTTTTTCA
ATTAATATGCGACCAATAGATAAACAATTTAGTGGATCCACAACCTTGGAAACCCCCGCT
TAGATACAACTCCTCACCAATAAGGAGCCAAATTATCGAAAATCTAATCAGGCGGTGATA
GCCAACGAACACGAGAACATCGAACGGCATGATTGCATACTCGGCTTAGGAAGGGTGTGA
GGGGGGTTTTGGACACGAAGATTGTTATTATCTCAATTAGACGAATCGGTAAATCCATAT
CAGGCACACGATTCAGAGAATGGTCTATGAAGGATTGAGAAGAAGGAAGCGGTCACGAAC
TATATCACTATGTGTGGGGTCAAACGCGCGTGCGCCGCGCCAACGATTGAGGATGTTGGA
GATGAAAGGTTTCAAATCAGCATGAGATAAAGGGGAATTGGAACAACATGATTGGAAAAA
GGAAGGAATCTACTGATCAGATGTTAGTTTGGGAAAGATCTGTCGGCAATGCACCAATAC
AGACAATATCCTAGGAAGGTTAGATGATAAGACATATCATCTTTCCAACTTTCGAAACAG
TTTGTATGGCCAAGTACGGTCAATCCCGATGCCGGCCTAGCTCTCAGGGTTGTCATGTAT
GAAAGGTATTTAATCTGTCGTCCGCCTGATTTTACTAGTTTTCTCAATATTCCACTCTTT
CGATTCTAATCAATTCTGATTTACACACTTTTCTAAGCTTACCACAATCAATTTTTTTTT
CAAATCTAAGTATCTACAATACATCGTGAATCTGCAAAAATGGCATCAAATAGCATAAAA
ACGACAGCACTCCGCGCTTTACGTACAAAATTGACATCAACAACCAAACCTACATTATCA
CCCATCCTCGCCAAAAACCGTGGTATCACAGGCACGACCAGAAAATCAACCTCTCTTGAC
TCAACCACTTCTATACAACCCGGCACACCCTTTTTGCCTAGAGGTATTTATTTCCCGAGT
TCTTAGCGAATCGATTGTGATGATGGGATGTGAAAATGAAACTAACCGACCTCCTTTTCT
GTAGATTTCAATGGCAATTTTCCCGTCTCCTTTTCCAAACCCACAACCACAACATCCTTC
AACACCCTGGTCAATTCCCTCACCACATCTCTCACCACAACATCCTCCCCTCATCTTCCC
ACTCTCACTCGCCTCCTTCACTCTTATGATTCCTCCTCTTTGTCCGACTGGCAGAAATAT
GCCCACGCAAACTCAAACAAGCAATACACAAGAAATCTAGTAGCAGAAGTGCCAGGAATA
TTTAATTTATTAATGTTGGTTTGGACACCGGGGAAGGAAAGTAAAGTGCACGATCATGCT
GCCAGTCATTGTTTGATGAAGATCATGAAGGGGGAGCTGAAAGAGACGAGGTGGGTTACT
CCTGAGGGAGGTGCAAGGACGCCGGAGGAGATGGATGTTGAGGGTGTGAGAGAATACAAG
AGGGGAAAAGTCGCGTATATGTGTGATGATGTGAGTCGTTATCTTTCATTTTCTTTTGTT
CATCTCCTTTTGCTTTTGCTTTATCGATCCATCGCTTGCTGGACGATGAGACAAGAATCA
CGTGGCTAATATATGATGATAGTTGGGTCTTCATTCCATCGCCAATCCTAGCGCAACAGA
ATATGCGATCTCTTTGCACTGTAAGTTCATTTTTCTCTCGCTCGCTACTTCTCATCTCAT
ATCACCTCAATCTTCTCATCATTGCCTGTCTTGACCCAATTCCCTATGCAATTCGTGTCT
AACAAGAAATACAGTATACACACCGCCAAACGCCGCAATGCACGGTTGCCACATCTTCGA
TCCGTTGACTGGTGTAAAGACTCATGTAGCGCCTGGTGCTTATGATTCTGTCGGTGGTGT
CGTTCATCCAAGCGCTTGAGCTAAGCTCTCGATGAGGAATGGGAGATATGATATGGTAGT
ACTGTGAGAACTGGGGAGATAATTGAGATGAGAGATACCCTTTTGACGAATTTTCTTGCA
TTGCTTAACTTTTCGATTCTTGGGTTGGGAGTTTGGGGTTGTAGGATTCTGATTCTTTGT
TCTTTTTTTCTCCCTTACCCTTTACCTACGTAGCAGTTCGCGGATGGACAGCGTAGCGTG
GGAACTTGCAAGTCTCGACGAAGATATTCGAGTTGTAGTATTGCAATGTCATACACACAC
AGCGCTGGGATAGATTTTAGTTTATTCTACTTTATTTGGTCTAACCCAATCGAAACCTCA
ACTGCATTTCGTGTTACTTAACAAAATCGTTGGCTTAAAAACACTCTAACCTCAATCTCT
GTTCACCATTTATGAATACCACATATTTCCAAAAAT
>eaaedc48-5dc0-4821-9381-60a8b95084ed (mRNA) 1469 residues [Bfab07:107792-109260 - strand] [genomic] name=Bfab07g00270.1
GAATTTCTCTGTCCGAAATCAGCAGATACTTATTAATAACGACTACGGGTATCCCCCGGT
GGCCCCACACGTTAAACAATTTGCGGGGTAACAACACAAGTGGACCCATACTAGCATATT
CATCGGTGGACACAAATAACCCTTCCAATACTTTCAGATCCAACAATCAAAAAAAGGATT
CACTCAAAGCATCTCAATATGTCTTCTTTCCAGGAATTTGACCGTTCTCGCTGGACCTCC
CACCGTGCAAATCTTTCAGGAACGCCATCTTCTTCATCAGAAGTAACCATTCACTACATC
TTATGCCATCCTTCTTCCAACGTTACCTCGAAGGGTACCATACTTCTTATACATGGCTAT
CCAGAAACGTCGTATCAATTTTGACATGTTATCACGCCCCTTTCAGACACAGGATACACA
GTCGTCGCCCCCGATTACCGCGGAGCAGGCGAATCATCTCATCCTCGAAAAGGATATGAG
ACGGTTCAAATGGCAACTGATCTCCACGAAGTTATCCAAAAGGATCTAGATATTAAAGAT
AAAATCCACGTGGTTGGTCACGATATCGGTGGGATGGTTGCTCATGCATATGCAGCCCAG
TTTCCTAAAGATACGGCGTCTGTTGCGTGGGGAGAATGTCCTCTTCCAGGAACAGACGCT
TATAACAACGCTGTTAAAGAAGGTATCACGGGAGGTCTGTGGCATTTTGTATTGCACTGG
CAAACAGATTTACCTGAAGCTCTCACTGCTGGTCGAGAGAACATTTACATTAAATCTTTC
TACGATCGCCTATGCTACAATGCTTCGGCTTTCTCTCCAAATGATGTAGAGCACTATGCA
AGTAAGTTTGCTCAACCGGGTGGAATGCGTGCGGGGTTCGATTTGTATCGTGCGTTTCAC
CAAGATGCTGAAGATAATCTTCGTATGCTGAAGGGTGGGAAGTGTAAGGTTCCAAGTATG
TCTTTGATGGGAGAAAAGAGTTTCTTGGCAACTATCGCGAATAAACAAAATGAACAGATG
TATGAGACTACTTCGTCTGCTAGTATCCCTGGCTCGGGCCATTGGTGTGCGGAGGAGAAT
CCGGCTGGTTTTGTGGAAGCTGTGCTTAAATGGACGAGCAAGAACTCGTGATTTACGTTG
TTATTTGTTGTTGCTCTTGTTCTAATCTCGGGGTCGAATTAAACCCCGTTATCAAATCAT
CTCATTATTCCTATGTATTCACCCTGTATGTAATTCTGGCAGAAGTCAGGGCGGCATTTC
CTAACAATTAGTTGGGGTACCACTAGGTTCCAGATATCCAGAAATAGAGAATCTTTGAGA
AGTCCACTCTTGACTCTTGAATATTCCTACTTCAAAAACATTGTTCTACATTTTTGTTCT
GCCAGCCAATCCCTTTCTTTCGGGTAGAGTAGGTGATAAATTTCTCAGTGCTGGAATCTG
GAATCATAATCAAACCTGCAGTCTATGCT
>49d5455a-feae-4a36-8ca0-84d5ef53fdf5 (mRNA) 2043 residues [Bfab07:109613-111655 - strand] [genomic] name=Bfab07g00280.1
ACCTTGAGAACTGACATACCCACCAAACCTTTGACAAGGCAACCAGAATAAATGAAAACC
TACCATATTATCTCTAGACATTTTACTGATCTGCAAATGTCCATGATTTATTGGAACAGA
TTTCTCGTTGATTAATCTCATCTCCATTCAACTTGTGTCCAAGGCGTTCGTTCATTCATT
TCTTTCACAGGCACAATTCACAGATCATGGCGGGGTCAACTTTACAGTTCTCGAAGCCCA
TGAGCATCAAAGAAATTTCCGCAAAGGCCTCAGACTTCGAATTTAATCCTACTATCGCAT
TGAAATATTGGTTGAGAACAGCTGATACACTTTTAAGAGAGGTAGATAGAATGATCAATC
GCTTGAGTGGTTGTAATGCTAACTTATTAGGCATATATTTATCAAGCAGAGGACAACGAT
CAGCAAGCTTACCTTTTGTTGATGCGATACGCTGCCCTAGTTGCAGAAAATTTGCCCGGT
CACCCATCCGCAAAGGATCCAGAAACTAGAAGTGCTCTCAGAGCTGCCCAGAAAAATCTC
CCGGATGTTTTGGACGGATTAGAGAGATTAAAGCCCAGGATAAATGCGCGCTACAATGAC
TGGCAGAAGGCTTTGGAAAGAAGGAAAGAAATCCATGCAGCGCAAGAAAATGACACATCG
CGCCCATCGTCTCGGGCAGATCTGGCGGCTTCTGATCCCGCGATAGCTGGAAATACAACC
ACATTAGGCGCCGCGGAGAATAGCGACCTGGCCGTAAAATTGGCGCATAAGGAGTTTAGA
AGAAGAGATGCTGCGAGACTTGCTACAAGACAAGCAGGTGTTACTGAGGAAGAGGAGCAA
GAAAGGCGGACTGCGGGGCTATGGGACGATTGGGAATCGGCATTGTCTAAATCTGGTCGT
AATGATGATGAGGATGTAATACGCCGAAATATGGAAGCTTCAAGGAGGAGGCTAGATGGC
TCCCATGATATTTCGCCAGATGGGACGAAGAAAAAATCTGCGGGACCTACACGACATGTC
AAAACTAAGGCCAGGAATGCTAGTAGCGCATACCGCTATCCATCTATCTCTAAGTCTCAA
CCACTCGTTAGTGACTCGGGACCATTCCCACCTCCCGGTCCTCTTCCCCCAAAGCCGCCC
AAGGAAGAATTCGAGACGCCGCATTTCGATACGCCCCCCCCACGACCCGAAAAACAATCA
TCAGACACTCACGAGATTTCCTCATCAGATGTCGTTGGTCAAGACCCAAAATTCACTTTT
CGACCTTCGGCATATCTCGAAAATGGCAAACCTCTTCGAACAGTCTTTCTACCGCCTACA
TTGCGACAACAATTTCTGGCCTGTGCAGCCTCAAATACACGGGCGAATCTTGAAACTTGT
GGGATGCTGTGCGGAACATTGATATCGAATGCCCTTTTCATATCTCGACTTGTCATCCCA
GAACAGACGAGTACCAGCGATACCTGTGAAACGACCAATGAAAGTGCCTTCTTTGATTAC
TGCGCATCTGAGGATCTAATGGTCTTGGGATGGATACACACTCATCCTACTCAAAGCTGC
TTCATGAGTAGTCGAGATCTGCATACACATTGTGGGTATCAAATCATGATGCCTGAGAGT
ATCGCAATCGTTTGCGCTCCCAGTAAAAATCCTTCGTAAGTAATGTTTTAACTGTTTGAC
ATTGGAAGAGGTGGCCACTAACTAGTGAACAGATGGGGAGTCTTCCGTCTGACTGACCCC
CCAGGAATGCCCGCCGTTTTAAATTGTAAACAAACGGGACTTTTCCATCCTCACGAGGAA
AGGAATATTTACACGGATGCATTACGACCAGGTCATGTCTTTGAGGCAGAAGGGCTAGAA
TTCCAAGTTGTTGACCAACGGCCAAACCCATAATGACTCGATAATGATGAGACCACGAGG
ATACGATTATTGTGCTTTGGTAATTAGTAGCGCTGGTGCTTGGTGGACTATGGTTAGAAT
TGTATTTTAGATCTCGATTCGGCAATAATAATTATACAACACATTACACAGCGGTCATAT
CTG
>48fc6894-cb99-405e-90db-06f9883350de (mRNA) 2785 residues [Bfab07:111819-114603 + strand] [genomic] name=Bfab07g00290.1
CCTCTTCAGCCCCATGGGGCTCTTCAGCCTCACCCAAAGTTAGTATTTGAAACTTTTTTG
TTGCCTCATCGAAATTCGAGATGCTAATTCATGCAACGATCAATACCCCAGGACTGCATT
GAACATTAAACATTGTGTGATTCAACGGCATCCTGAAATCATAAGCCTTTCAATGCTAAT
TATCCACAGTTGCCATTGAGCTGATCATAGACATTGATGTTGCGCATATTCCCACGTTTG
GGTAGGACCAATCTACTTAAGCATCCGACCATTTTACAACATTCGCGCCTTCGAGAAATC
CATTGTTCGCCATGTTATAATATACCTCAAGCCTCTAAATCCCCAGAACCCATAACACGT
ACCGATGTGGATCCCCCAGTCAAGCGAACGCACCGGAAGGCTGTGACCTCAGGGGACATC
ACAGGAGAGGATGCTTTGGCAGTAGGACCAGTGAAGCGTAGACCTAGAAAGGTTGCGGAT
GATGTAAAGGTCGATGCAAAGGATGAATCAATAGTTGAGCCCGTAAAGCGCAAAAGAGGT
CGACCCAGAAAAGTGAAAGAGGTGGAGGTGGAGGTGGAGGTGAAGTCAGAATTGGAACCA
GTTCCCAAAGCGAAACCTGTACCAAAATTGGAAGCAGAACAAGAACCAGAACTAGAACAA
GAACCAGAAGCGGTAAGGAACAGACCGAGCCGTGATAAAAGTAGAAGTCTCTGACCGGCA
AACAGGAAGAAGAGGCTGTAGTAAATGAAGTGAACGAAAGCGATTTCATACATATTCCCT
TGGACCTCAGAAAATACATGAGAGATGCTCACATGAAAGGGTCAATCATGGGGGACAGAA
CACGTTCGAATATCATGAACGAAGCACTGTGTGGTAAGAGCCAGTCCTTTTGCGCTATGC
AATTATCATTTAGTAATCTGGTCCAGATGATATCTTGGATCGCCTAAAGCCATCGCTTTT
AAAGCATGTTGGCTGCGACGTCATCGATATAAATCCAGGCATAGGCATGTGGTCGTCTAA
AATCCATAAAATCCTTAAACCTCGAACACATCTCCTCATGGAACCCGATGCGAAGAAGTA
CAATCCTTTCCTCCAACCTCTTCTTGATGCAGAAGATTCTACTTATCAACACATACCGAA
ATCTGGAACGGTCTGGGAACATCTAGGCCAAGTTACCACTCCGGAGTTCTTGCCCCATCA
GGTAAAACTTTCGCGAGATGATCCCAAGATCAACGAACCGAACAATACCCTCCTCGTAAT
TGCGAATCTTGCCCACCACCCCAGAAAGAGGTACCGCGGTTTTGAGTCCATTTCACAATT
AGTTATGTATCAACTTCTTTCCGCAGCAAGATCGCATGCCTTATTTCATCAATATGGCCT
CATACGAATGCTGGTATGGATACCAGACGTAGAAAAAACTTCTTGGTTGGTACGTCATGT
CGCCCAAATGCGTAAGAATGCCGTGGAAGCACAAATAACTACGGAACATATTCAAGAGAT
TGCAAGCTCAACTGTAGATAACCACCGATTTGTAAGAGACGCCGAGGTTGCATTAGCAAA
TTCGATAGAGGTTGTCAGTAAGATGGATACAATGGGCATAACGACACCCAAACATAGGCA
AGGCCCAATGGAGTTCAAAGCCAGGCAGTCACTTGCTACAGGTGGGCACAAAGTAAAAAG
CCAAGATTTCGATCGCTTCAAGAGAGGCTGGTTCGATGAATTTAGGGATCTCCAGAAGCG
ATTGGATGAAGGGAAATTAAGCAAATATACGACACCAGAAGGTGAGAAAGCCGGAAGTGC
TGAAAAAGACAAACGAAAGAGGGAGAAAAGAAATTATACAGAAGAATATGCACGCTATAT
CTTCCTTAAAGCGAAGAAAAAAGTTATCAACCAACACGGAGAGCTGACACAGGATCTTGT
CAATGACTACAACAACATCAACCAGCTTCACAGTAAGATCTTGAAAGCTGTTTCGGAGTC
CAATGATACAGAGAGTTTAAGAAATAAACTGGACACAATGATAAAGATGTATGAAGACAA
GATTTCCCAGCTTCCTCTTGCTGCTCAAAAGATCTACGGTGTCAGACTCGACGGTGCGCG
CATCGGTACACAATTTGAGAAGAGGCCAATGGAACCCCTCAAAGTATATCCGAAAGAATT
TAGACCTGCTTCTGAGTTGTGTCTTCTGGATATTCAGCCACAAGCTCTTTGGCCTATCCT
TCGTCAGAATTACCCGGAGAACTATGATGTCTTCGAATACATAATTGGTAATATGTACGC
ACATCCGATTGATACAGTCTATGAGTCTTTGGAAGGATTATGGCCCGGTGCCCTAGAGCA
TATAGCAGGCGAATGTCCCTCTTTAACAGATCCTTCGAAAGGAGGAGCATTTGATCTAAA
GCATTTGTCTGTAAGATCCCTGACAACGGAAATGCTGAGGGAGATTGTGGAGGCATGGAT
GAGGTGGCCATTCCGTCCGAGTCGATTCGAATTAATGACCAAGAGTGGCAGTATGGTACA
TGATCCAGATAGTCCTGATGAGGATATCCTGGATGGCCCGTAAGTATAGTGCTATTCAGA
ATTAAAAAAAAGATTCAACATATCTATATGGCCATTTCGCTGTTTCTTAAGTATCGAGTT
TTGGTATTGCTAGATACCTCATCTGAATGCAGAAAATGCAACGGATACTATCCGGACGCG
TATGCAAAGAACTGATGAAATTGAAATCAGGAATACGAGAAATGCCGAGTTTGATAACTT
AAAACCATACGTCTCTTCTGACTGA
>c58351a1-0f15-42cb-ad5d-0fc7cc754982 (mRNA) 1268 residues [Bfab07:115525-116792 + strand] [genomic] name=Bfab07g00300.1
CCGGAATCGACTGAGATGGTATGACCACGCGGGGAATCGTATATTTATACAATCACAAGA
ACTCATATCAACGTAAAAATTATCATCTTCTTGATATTCGCAATGGAATCTACAAAAAAA
TGGGCAGATGGCCCTTTCAAGCTACTTTCAACTCCGAGAGGATCGTTAGATGTATGTGCC
CCCAACGGCTCGATAGCAATATCAAATACTCACAAAACAAAAGGGCAAACCCGAATCGCT
GGCATCCCGCAATGCATCAGAAATGGCCTTACTTCATAATATCCTTCTTAGAGGTCTCAA
TTGCATTTATATCCAAGCGCCCAACGTGAAAGAGACCTTCGATATAGCAGATTTTATGAA
ATTCTGCGATGCATGGTCTTCCATTCTTCATTCCCATCATGCCGCTGAAGAAACCATTTA
TTTCAGATTGCTCGATGAGCAAAGTTCTAGAAATGATGTTTTCATTAATAATCATAATGA
GCATGAAAAATTCCTTCCGGGCTTGTTTGCTTTTGATCTTTATGTTTCGGGAGTGAAAGA
TGATGCGAAACCTTATGATGGATTCAAATTGAGAGAACTGATTGATGTTTTCGGACCTGA
TTTGGAGAGTCACTTGCATCATGAAATTGGCGTCCTAGTGGACCTGGAAAAAGATGAATC
AGTTGATTGGGAAGAATGTGGGAAGGCGATGGCTCAATATTCGAAGAAAAATGCTGATAA
AGTATGATTCCACAACTTCAATCATCAAATACACACTCAGCTAATGTTTTGATAGACGAG
AGACGTCCCGTTCTTAATCACAAACTCAGATGTGACTTATGAGTCTGGTATTCATGGGCC
GAGATTCCCTCCCTTTCCGTGGTTTGTGGGATTGATATTCAGGTGGATATACATCCCAAA
GTTGAAGGGCGCGTGGAGGTTCTCATGTTGTGATGATTATGGGGTGCCGAAGGAACTTCC
TTTTGCATGATTGATGAGCTTGCTTGACTGTGATTTGAGAGTTGGTATATCTGATTCAGA
CAAGGGAAACATGAGGGCTCGACTTCTGATCCTCGAGATCCGTAGAAGTCGAGAGGGTGA
CAGCCTTGAGACGAAATGCGTACGTTCTATGTATTGGTTGTGTTTTGGGAAGTTATCGAA
TTTATATTTAAGTTTGTAGGCCAGCACGTTTGTGTTGGTTAGTGTTAGGTTAGCTAGTGA
TCTCCGGGGTCAAAATGATGCTATTAATAATGAAACCCCTGGCTAAGGAACTATAATTGC
TTGCACTA
>a17aee44-75f4-4090-be0c-2ed0b159ed93 (mRNA) 1445 residues [Bfab07:116935-118379 + strand] [genomic] name=Bfab07g00310.1
TCCTGTTTGTCACAACCTGTGTGACCTTCTCGATAAGGATACGATAAGAATCTACCCCAC
CTTTGTCGTCATAGAAATACTAATTACTACGTGCAAGCCACCTTCAACCAGATCAACAAT
TGCGAGACTTGAATGTTCAATACTATGGCTGCAACTACTGGACAAACGGCAGATATTGCC
ACTGAAAACACACGTCGTGCTGCGCAGGAAATTCAAGACTATCTCCAAGCTCGTCTTGCC
GACACCTCTGGTCCTTCTTCATTCCGATCACTTCCAATTATCGATCTAACCCCTTCATTC
TCGCCATCTTTAGCCGACCGTCAAGAGGTTGCGAAGAAAATCAATGAAGCATGCGCGAAT
GTTGGGTTTTTCTACATCACGGGTCATGGAATACCACGGCATGTTTGCGAACAAGTATTT
AAGCTTTGCGAACGCTTTTTCAGCGAATTGCCTCAATCCTCCAAGGATGCAATCCACATG
AAGAACTCAGATCAGTTTAGAGGATACGAGCCGGCTAGTTACTCATCTGTAAATGATTTC
CAAACTAAGGAAACAAAGGAAGCTTTCAACTGGGGTTATGAGTATGGTTTGGATCCTACA
GGTGGGGACGGAAAATACGTCGAGCTTGATGGTACAACTGTTGGTGGTATAAACCAATGG
CCCAACGAAGCTGAAATTCCTGGTTTTTATCAAGGGATTGCAGACTATTACGGAAGGGTA
ACCCTAACTTGCTGAGAATTTGTTTACATGTGTCTAATTTTGTCGCACAGATTTTGGAAT
TGTGCAAACACCTATTCCGCCTGTTTGCCTTGTCTCTATCTCTTCCAGAAGATTACTTTG
ATCCACTAGTCACACATCCTGGAGGGATTGCACGACTGATAAAATACAAGCCAAATGCCA
ACCCCAAGCCTCTTTCTGCCTCAAATGAAGAAGAGGAAGTTGGTCTTGGTGCTCACTCAG
ACTACGAATGTTTCACTCTCCTTCTGCAAGACTCAACCCCCGGTCTAGAGGTCCTTAGTC
CAGACGGAAAATGGGTCGCTGCCGAACCCGTTCAAGGAGGAATCGTAGTCAATGTTGGCG
ATTTTTTGATGCGATGGACGAATGGACTTTATAAAAGTACCATTCATAGGGTTGTTAACA
GGACAGCCAAAACTCGATACTCGGTACCCCTATTTTTCTCAATCAATTACGATGAGATAG
TTGCGACGTTACCGTCTTGTGTAAGTGATGAGAATCCTTCCAAATATCCTCCGATTACTG
CTGGGAGATATGTGTTGGATCGTTTGGCTATGACAGTTCCGGGGAAATACTGAAATCACA
ATTACCATGGACTTCTTCGCCTTTTTAGCGTTAACTCAAACAGAAATTCCATCAATGGTT
TTGTTCTCCCTGACTCCAAGTTGAGGTGCTTCCAACTATTTACTGACACACCATGACACA
CTACC
>3582fffc-2e7e-4306-83cb-46b39f3c328f (mRNA) 717 residues [Bfab07:119074-119790 + strand] [genomic] name=Bfab07g00320.2
TCTCTCAACGTCAAAGATATCTCGAAAACGATTCTCTTATTCCTCACCTCCTGGCTTACA
CTTTTCGCATCCACCAAAACTAATGCACCATTGTCATCTTCCCCCATTTCCCACATAGTA
TCCTGTCTCTTCGCATCTCATATCCCACAAGAACTCCCCTGTACCCCGTCCTTTGCCCTC
TCCATAATCCCCCTCAACACCCGTCTAAGCTACACCCCCTCAGCCTTTGCAATCCCTACC
ACAGTTCCACAAATCCAAGCCGCCGTTCTCTGCGCCGCAAAACATGGCATCAAAGTAAAC
CCAAAATCCGGAGGTCATAGCTACGCATCCCATAATATAGGTGGAGAAGATGGACATTTG
GTGATCGATTTGCGATATTTCGATCATGTGGTTCTGGATCCCGAGACGTGGATTGCAAAC
GTGGGGCCTGGGGCGCGGGTGGGAAACATGGCTTTGGCATTGTATAAACAAGGGGGGAGA
GCGATTGCGCATGGGGTTTGTCCGAGGTAGGGAAGAGATTTAAGAGGGTTTGTCTTGGGA
TGCGTGAATGTTATTTGTAGTCTCCATGTAGCTGAAACTTTGAGCTTGGATATACTGATA
ACTCATAAATTCTAGCGTCGGAATAGGCGGCCACGTTCTCCACGGCGGCCAAGGATACTC
CTCTCATACGTACGGCCTAACTCTCGACTTTCTCCTCTCGGCCGAAATCGTCGTCGC
>e2f1442d-e8e3-4715-8078-7f40b5a66512 (mRNA) 1109 residues [Bfab07:121088-122196 - strand] [genomic] name=Bfab07g00330.1
GAAGGGAGGGATATAGATAGGGAAGGGTCCCAGAATCGCAAGTTTTTGATAACAGTCGAG
AACGAAAAGAAGAGATTCTCTGGAGAAGACACAATTGCGACTCCAAACTTGTGGATTGAA
CTCGCGAAACCCTTTGGGAACCAACTGGACGATAATCGAAATACAAACAGGGTTTCAAAA
AGAGCTCGGTTTAGCATAATTGCCTTCGACACAACTAATACTACCACATAAACACGCCGC
AAAAATGGTCTCAACACTCTCCTCCTCCTCAGGCGGCATTCGCGATCGCTCCACTGTCCT
CCTAACCCGCACTCGCACAAAGTACCGCTGGCCACCTCTCCAATTGAACTTTTGGATTCT
CATGATGTTAATTGCTTCCTCCACTATCCTCGGTATCTCCGCCTACTTTGTCTCTGTCCA
AAATCAGCTACATCTTGGTGTTCCCTGGTATTTCCCTTACTGGATCGTCTCCGCTTCTCT
CGGCGTCGTATTCCTGATTATTATGCTCTGGCTCATCTCGCAGCGTCAATTGCTTCCTGG
TATCGTCATATTAGGGACTTTTATACTATTTGTATTATGGCTAGTAGGATTAATTGTGTG
GAGTATTGAACTCTGGGGTCCTACGGGCAACGTAAATGGAAACTGCAATTTATATGTTAC
GGCGAATGAACAAAGTGGCCCGTACTCGTCGACTTTGGCGTGGTTGATGCAGCATTCGAT
TTGTCAGAGTTGGATTGCGGCGTGGGCGTTTATGTTGATTGGGGTTGTCTTTTTGTTCTG
GATGATGATTATGAGTTATCAGGTTTATAGAATGGATGATTAAGGGGAAAGATAGGAAAG
AGTGTGGGATGTGAAGTGTGATTTTAGATGATATTATGAGGTGGGAATAAGGATGGGGGA
TCGGTGGGGGAAAATAGGTTATTGGGAACACATTTGTAGGACGGATCTACGAATGGGGGT
TATTTTACGATAAAGGGTACTAGTAGATACATGCTAGATGGATGAGTTACGAGTGATGCA
TGGACAAGGCGTTTTGGGGAAACGGGAATCATATCATTATCAAATCCCGTTATTTGTCAT
TTTTGTATGCAATGTACAATTTTTACATA
>97b13a6e-d382-49ee-aec1-94b4f8011702 (mRNA) 2104 residues [Bfab07:122871-124974 - strand] [genomic] name=Bfab07g00340.1
CTTAGAACTCCCAGCTCAGACCCATTCTCGGGTCGAACCAAGTCAGACCAAGTCATCGCC
ATGGAATTTGTCTGATCCAAATTCAATCAAATGAGTACCGATCAACATCACCACAATGTC
AATGTCACCATGCCACTGCATCCAAACCATCAAAAGCGTCAAAGTCACTCTTTCCCGTGT
TGCTCCGAACGTTTCTTGACATCTTTACAAATACTTTCCTCATTGGTGCCCCTAATCTTT
TCGATTTATCATGGGATCTGTCTCATCTCGTGTATATTATCACTTAGGGGAAACTGTGGA
AAGGAACTTCCTCTAAGTGTTAGACGCGATTGTGAACTCGCGAATACCTGCGCTTAGGGG
TCAAAGTTGGAAAAATTAGGTGAGAGAACTGTTAGAGAGTCCCGTAAGCTAAACTTGGAA
GAGCCCACCGATTACTTTATGAAAAGATAGCAGCGGCTGGAGAGAATTTTCTTTTTCTAC
AAATACCTCAACGTTTCCTTTCCTCTTTCCCTTCTCTCTCTCTTTCATTTCAAATTCCAT
CTCGCGATTCACTCCCCAAAAGTGGTCAATTACACACATCTACCCCAAAAGGTCCTATCA
CTACCTCCCCACCTCTAAACACCCCGCTATCGATAACTATCAAGCAACTAAAATCAAGCA
ACGAAAATCAACTGCTTCGTACAAAGCCAGCCCAACAACAACCTCAACTTATTGTACATT
CCCACAAATTCCGTCAAAATGACTACCACATCAATGGTTCAACCAAAATTCTTATCAAAG
GCCGATCAACTTGGTGTCGTCGCGGTTGGATTCTCCGGTGGACAAGTAAGTTGCCCACTG
TTCTCTTCAGACGTCCCATAGACACAAACTAATCTAATCAACACAGTGTAAACCAGGAGT
TGATGCCGCACCTTCAGCACTCATCAAAAGTGGTCTTCTGGATCAACTCGAAGAGGAACT
AGGATACAAACTTCACCATGATAACACTGTTCATTCTTACAAGGAATTGATTCCTTCTGA
GGATCCAGATCACCGAAACATGAAGAACCCTCGTGGAGTCTCTGCAGTTACACAAAAGCT
TTCTGAACAAGTTTACGAACATGCCAAGGAGGGTCGTTGTGTCTTGACTCTCGGTGGTGA
TCATTCTATTGCCATTGGGTCGGTATCTGGAACCGCAAGAGCAATCCGTGAACGTTTAGG
AAGAGAAATGGCATTGATCTGGGTTGATGCACATGCCGATATCAACACCCCAGAAACTTC
AGGCTCTGGAAATGTCCACGGTATGCCCGTTGCATTTTTAACGCGTCTCGCACAAGAAGA
CAAGCCAGAAATCTTTGGATGGCTGAAGGATGAGCATATGGTCAGCGTAAAGAAGATTGT
TTACATCGGTTTGAGAGATGTTGATAGAGGAGAGAAGAAGATTCTCCGTGATAATGGAAT
TAAGGCATTCAGTATGCATGACATTGATAGGTTTGTGTTCCCGTCGCACTAATTTATTCT
GTACGTGTTCACTAATATTCTCTCGCAGACATGGTATTGGCAGAGTTATGGAAATGGCCC
TCGGTCATATCGGTAACGATACCCCAATCCATCTTTCCTTCGATGTCGACGCTCTTGATC
CTACATACGCTCCCTCAACTGGTACACCAGTTCGTGGAGGTTTGACCTTGCGAGAAGGTG
ATTATATTGCTGAGTGCGTTCACGAGACTGGTTCTTTGATCGCTATGGATTTGGTAGAAG
TCAACCCTACACTTGAACCTGGTGTCAATGATATTGGAGCACACGAAACTGTTAGAGCTG
GATGCTCTTTGGTTAGATGCGCTTTGGGTGAGAGTTTGCTATAGAGTGGCGTTTCAGATA
TTGGGAATAGATACTGGAAGAGACATTTGAAAGAATATACCCTTAGATGGAGGTTGGCTA
TTTATACTTTTGGTATTGGATTCCTTGGGTGGCCCTAAGAGAACGGGTCTTGATCTTTCA
TTTACGGTTATACTTCGCAGCTCAGAAGGATAGAGGGGCTGGTGGATCAATTTACTTTCA
CATGCTCAAGACACAAAGATAGATATACAAATCATCGACGAAATCAATACAAAAACATTT
TAAA
>e855061a-2dc6-44f1-9b00-3c8c02b8bcaf (mRNA) 1845 residues [Bfab07:125188-127032 + strand] [genomic] name=Bfab07g00350.1
ATCGATCAAAAGCAAAGCTCATCGCATGTTCCCATCCAGAGAATAATTGAAGATGCTCTA
TTCGGACTATCACGTCTTCAGTTTTATACTTGGAGGATTGCAAGGAAAGATTAGAGGAGC
CCGAGAGTTATTTCATCGTTCCAAGCATATCACGGAAATGCAAGTCGAGCTTCATACCTT
AGAGCCACCACCCAGGAAAGGGACTGGAACGGCTGGTAATGGCACGGGGACCAGAAGAAT
CCCCAAAATCGGAGGGGAACCTTGAAAATGATCTCGAATCGAACAGTTTACTCTATTCTG
AAAGCCTCTCAACTTCAGTTTCTTGTCTGGTCTCCTGTTGGAAAGCACTACATCGACCTG
ACAAACATGAGCCATAATATCTTGCTCGGTCGTTCACTTTGTTGACAGTGAATTAGGTCT
ATTCACGAAATCTATTTCAGTAGTACGGCTGCTAAGCACATGAAATCTCTGAGAATCCGA
GGACGCTTGCGTTCTTGTACTATCTAAGCATCTCGGGAAACATTCTTTCGAGCACCATCA
GCGTTCATTTCGAGACTCACCCCCAAATCATCATGGAGGCAAGTCATGATCCAGAGTGTC
GAAGAGTCTCTAAAACAACCATAAATAGCCTCGAATATCTCTACGACGGCGAGCGTATTA
CTTGTTTTGGGCACAGCTTCATAGAAATATGTCTTGGCGATGATAATCGTAACAAACCTA
TTCAGTTCTGGAAGGCTCAGCTCGCATTCCGAGGCTTTTCACCGAGAGAAAGCGATATCG
AGGCTCTCAAGCAGCGTCTGGTTAATTCTAATACCGATGAGCCGGATACCGTGGTCGAAC
AAGGTATTCAGAAAATGATGAGGGCATTTCGCAAGAAGGATCGTGAAAATAAAGAGCCAG
TGCACCAAGCTCAGCAGGCTCGACACGAGGAAGAGGGTAAAGATTCTGATCAGGATTTAG
TGAAAGACAATAACGAGGGAAAAGATCACTCTGAAGAAATGCGACGACGATGCCGATAAC
ACCGACGAGGAACTTGACGACGACGAACTTGACGACGACGAACTTGGCAACGACGAACTT
GACGACGAGAGAGTTTACCTCGGAATGTGGGCAACTACCGGACACTGGGAATTAAAATGC
AAAACTATATCTTCAAACTACGGTCGATCGGAACCCTACACCCTTGACATCTTCTCTGTA
GTATGTACACAAGGCTTCCAAGTCTTCGGCCGTTTCAATCTCGGGGAATTCAAGGGTATA
ATCCGATTTGCTCGGGGAGGCAACTCTGCTGATCGAAACGAATATATTCTCGATCAAGAA
TACGATGCCTGGACTGCGGATATGGATAGTACAAGAATCTATCGATGGAGAGGCAAAGAT
CGTCGGGACATTATTCAACTCGGCTCTGATTCATATGCTTACACAATGACATTCTCGCGT
GCCGGTACAAGAGTCAACGGTGTCTGAGGTACATGCGATGGAGATCCAGGAACCGTGGAG
TTTATTGGGAAAAAAATCTCGGAGGAAGACACATTTGCTAGGGACGGGATTCTACAGGAG
TGGAGGGATCACAACCAGCGTGCTTATGATGCGGTCAATACGGAAAGATGGAGATGATGC
GTTGTGGGCATGTAACCTGAAACATAGATTGACTGATGCACTTGAGCCTATCACTGGAGA
TAAGGGCCACTATTGAGTTGATAGCAGACTGGTGATGATAGGTGGTAGTTGAGGGATGGG
ATAATGATGGGATGCGGTAGTTCCATAGTGCAATATCGATGGTATGCAGATGGGTCAATT
GTAGGAGTAACAAATTCATCAGCATTTGGGGCGTGAGAGGGGATT
>18d56b61-d035-4fd2-adf3-247ddddbf7c7 (mRNA) 748 residues [Bfab07:127604-128351 + strand] [genomic] name=Bfab07g00360.1
AAATGATGGCGTTTTTAGTTTACTGAAGGGTATATAAGTCCCCTCATTCACTTGGGTTAA
CATCTCTTCATCAACACTAACTACAACTTCCTACTCAATCAATACTCAAGTAACTACACA
ACTTTCCAAACAATAAAACACTTAAATCAACTTCATCATCATGGATTTCGTCAAAAGTGC
CCTCAAGAGTGGTTCAGGAAGCTCAGGAAGCACTGGTAACACCAACCAAGCTGCTGGTGG
CGCTGGAAAGGAGGATTATGGTGACAAGGGTTTGTCTACCTCTCTCCTCCATCTCCTCCC
CTCTCCTTCACACTTTCGACGACCTCCGCAATTTGCGGTGTACAATCAATATCATGCTAA
CAATATACTCAGCACTCGACTTCATTGAGAAGAAGTCCGGCCACACTTTAAGCCGCGATC
AAAATGAGAAAATCACCGACGGTGCCAGAGGATTGTATGAGAAGCAGACCGGGTATGTTT
TTTTTTTTCGTCTCGCCTATGCTTGCGCCCCTTTCATTTACTACGAACTGTTAACTAACA
TTGCCCCGCTTGTAGAAACGCGGTCAACCCCAAGTTTTCCAACTAGATTACAATTTTCAT
GATGCATTATGGGAGGCTAAGGCTGATTGTTATTATACCATGATTATAATTGGATGGGGT
TTGGGATGGGATGGAATGAAATGAAATGGACTGGGTTATGGGCCATGACGAGATTTAATG
AATTGATACCACACAACAATGTTCCCAC
>c7573506-5307-4d90-8f4c-1a037be55259 (mRNA) 1453 residues [Bfab07:129125-130577 + strand] [genomic] name=Bfab07g00370.1
TCATATAGCCTTCCTTCGAACACGAATACCACTTGTGATGGCGTACGCTACTTGTTATAA
GGTTCCTGCTGCATAAGCTGCGCAACTTTACTAAGTCAAAATCAAAATAAACACTTCAAA
ATGACTAGCATAGAGGAACACATCGCCACAGCTGCAGCGCTTGGTTCCCTACCCCTCTTA
ATTTCTCCGTCAGGTGAAAACATTCTTCTCTCAATTGGATATATTCCTCTCCTCACAAAC
CATACATTAAAAGAAAAATCCAGAAAGGAACCCCGAAAACAAAACAGAGATGTCGAAAAG
AGTTCTCCGATATACTTCTCAGCACTCGAACTCGTACGTGATAATCAGTTTTTGCTACTC
GCCGGGCCCAGTGGAAGTGGAAAAACAACTTTCGCGAAACATCTTGCTTTTCGCATAGCG
ACTACCACTACGGAATCTATTGGAGGTGGTTTTATTGTGAGAAACAGTCCAACAGATGTT
CTGGATGAGTCTTGGGAGTTTGAAGGCATTGATATGATACCTTGCTATTTCTGCATCTCT
AGCGTTTCTCAGTTCTCGACATTGCTTCAGGAAACATTACCTCAGCTCATTGGGAGCTGC
AAGGATAGTAGCAAGTCATTTTGTCTATTGATCATTCTTGATTCTATCGAATGTCTTGGA
GGAGACGGACCGTCACTTTTAAAATCTATGGTTCATCTAATCCAATATCAGAAACAAGCG
TCCGTAAAACTACTCGTCCTTGGAGAAAGCAGCGTTGTGAAAAATTGGATTTTGGACTCC
AAAATAACAAAACATGATATATCACCACTTTCTCAAGTTAAGAGACGCATGTTCTTGCGA
AATATCACCGGCATAAATATTGAATACACAGATGTCGAGATCGGAATCGGTGGAGCAGCA
AGTCTCCCAGCATATTTTGCACTCGCATTAGAGACTTCTCACGGTGGAGAAAAAGCAGAG
GAATTATTAGATGAGTGGCTTCACGCCGTGCTTTCTGAGAATTATAATGATAGAAGAATT
ACACGAGAGGCACTGGATCATTCAATCCGGGAAGCGGAGCAGGGCATTCGAACTCCATTT
TCGTGTAAATTGAAAATCGCAAATCCGGCGATTTTCTCCAAAGCAATACAACACTTACTA
GCTGCACGACAACTTATTGAAGAGGACGCACAAATAGCCATTGATCTTTTTCATCAAAAT
CCCATTTTGTCAGAACCGATTATTCGCAGCTGGTTGGTTCGCCTTAGAGATGTAGGAAAC
CCAGAGCTACTTGCATCGCTTGAAGGTCTGGTCGCGGGCTGTGGAGTAGATGCGCAACTA
GGCGCACTGTTAGTTTCGAATTTCCTTCTTTGATCCAGTTCACGGCATCAACGAGTTTCC
GCGATTATCAAAGAAGGCACATTACCCATCACCCAAAGATTAAAAGCCGGACGTACACTC
TCCCAGCTTGGAG
>65092d15-be05-4f97-a227-1edc1ea0c179 (mRNA) 741 residues [Bfab07:130634-131374 + strand] [genomic] name=Bfab07g00375.1
TCTTCTTCTGACCCGAATTTATCATCTCCTCATTCTATCACCATTCCCCCATACCAAATC
GGCGTTTTCCCAGTTGTAAATGGAGATTATGCAATATTCACCCAAGAGACAGAACGGAAA
TGGAATAGTCCAGAGCTCATCCCCTTCTACAGAAAACTTCCCAGCTACAGATCTTACCTG
GTACGATGCGCACGCGTATTGTCCCTGGTTGACAACACGCTGGAAAGCATCTGAAAAAAT
TGCGCTCGATGAGGGAGTCCGTTTACCGACTGAACCGGAATGGGAAATTGCTGCTCGAGG
TTCTCAGACATCTGGCAACGAAACAGAATCGATGTATGCATGGGGCACAGAAAGGAACGC
AGGATATGTTAATTATAAAGATTTACTATTGAACGAGCGTTGTACCGTCGGTTTATTTCC
TAAGAATATTTCTCCACATGGATGTTTCGATATGGTGGGGAATGTATGGGAATGGTGCAA
TTCATTGTGGGGTGAAGATTTGAATACATCATCTCTTCCATATCCTTATCAAGAAGATGA
TGGACGGGAAAATGTGGATGCAGATGCGGAAACCAGAAGGGTGATAAGAGGATGATGTTT
TCACAGTTCGAGGGAAGAGGCCTCTTGTACGTATCGTGCAAGTCTTGAGTCGGGAGAATG
GAGGCGTGATAATGGTTTTAGAATTGGCTTGCGAATATACAAAGGTGAATTGGAACTGCA
TTGGAGGTGGGGGACTTAGAT
>4be680cb-125a-4cf7-a23c-c4ab38419381 (mRNA) 628 residues [Bfab07:131531-132158 - strand] [genomic] name=Bfab07g00376.1
GATTCCGATATATTGCAATTGAAAGCAATCGACTACATCACTATTTCTTTACAGATTTTT
GCAACTTGGACAGATTGATAGTATCTATCCACACAATGGTTTCGATTATTTCACTTGCAT
AGTGACCATGTATCGTCAGATTTCACTATGACGAAAGCTGAATAACTTGTGCACGCAATC
ACGCGACTCTGGAACGGAATGACCAACTCGGAAATCGAACCCGCGGCACAAAACCCTTTG
GAGCTCTTGGTGCCAGTGATCAAAGAAATAGAGGATTATTCTTCTCGAGACATGGAATAT
ATGAACAGGAGTGTTCAATCGTGGATCTCTGATCTCGACCATAACTTACCTACTGTATCC
CGAGCTCGCCGGGACGACGCCTTGCTAAAGGTATGGCATAATGGTCGCGGATCTCTCGAA
AGTTTTGAGAAGATTACTTCAAGGATCGAGGGTTACCAGGAAGAAATGATAGCTCAGGGT
GTAATTGAACATGATCATAACGATAATTAAAAGTTTAAGAATATGATGCAACAACATAGA
AAGTTATTAAAGGATGCATATCGATTAGAACAGCATGTCTGCAACACTTTACAGATGAAC
GTTGGGAATCTTTCCTTGAAGGAATCTA
>c03f0bfd-63e9-4149-9f47-d0ffb8ac375f (mRNA) 5378 residues [Bfab07:132904-138281 + strand] [genomic] name=Bfab07g00380.1
GACAACGAATATCGAATTTATATGCACGTCAATTATTGGAAAAAAAAAAATCATAGCAGA
GCAAAAAGCAAATATCAAAATCCTCTTGATTGATATTCTATGAATATTGCGGTAACGATA
ACATGCTATACAAACCATTCAACCAATTTCTCATCACCTCACCAACTCCCTAGACTGGCT
CGTTGCTGCTATCATCAATTCAGCCAGTTCAATTTATCCACTGCCGTCGAGCGCATTACT
CCTGACGAAAAAACACAGCATATAGCATAGCATACAAAACCTGCGGCCAAGTACGAATAG
ATATACGGCGAATGCGACGCGTTGAACTATCTGCAAGGCAAGATGGCGGAGGGAGATGAT
TACACAATGTCGAGTTTGTCAACAATGTCGGAAACTGATTCACGGCCACGAACTGCACGA
CAGGATTCGGAAAACGAGGCCTTTACATTTCATAACATTGGCGATTTAATGGCAGATAGA
AGTGATAACGACGATTCAATGTCCATAAACTCGCAAGCTTTCGAGCAGAACAATCGAACG
GATTCTTACGACCATAGGAATTTACCTATTTTGTCCCCTCCCACTGATAGCAGTGTACTT
TATGCACATAGCGACAACGGAGATAATCGAAGTGAAGGTCTGCTGAGTGCCGTAGATGCA
AAGGCAATGGAACAACACCTGGATAATGTCGAATCAAGTTTCCTTCCTAGCGTTTCACCA
ATTGGTAAACATGGCAAGGCCGGTGCTGATGATACATATTTATTTGATGCGGGTCGGAAT
GGCGAAAAGTCCCCCGCAATGGAAACACAAACTCCCACGAGGAAGAGATTTGCAATTAAT
GAAAATGAGGGTCATGGTTCTCCGACACCCTCTTCACCTCCCACGCCAGATGGTGCATAC
AAAACTCCAGGCCCTGCCCCTCGATATTCTGTGCAAGGAGAACACGATGATTCGGAACAA
ATTGGAAACACGACTTCCAACCTCGAAACTCTTTCGTCGTCCCCAACAGCCGCTGCCGCT
GCAAGGACCATATCTCGAGCAATGTCAATGGCAAGCATGGGAGAGAATTCCGAAACAGCA
GCACAATCTACTTCTCAATCACAGCAACAATCAGATGAGGAAGAAGATATGGAAGCCACG
CCCACAAGATCGCGCCAAAATTTACGTGCATTTGTCCAATCGGTGAATGATAGCTCAAGC
CTACCCAATGACTCATCGACTAGGAGTACAAACAAACATTTGACGGTCGATGCCGGTGCG
ACTCCAGGGGCCGCACTTTCAACGCGCAATACGTCTATACCTAAGTTTCTCACCAGTCGA
CATTCAAGTCAACGATCTTCTGTTTCCTCTTTCATGACAAATTCTGAGATTCAAGACGAT
CGAAGCGATGTTACAGTTGGTGCAGATTATGCTTTGCAATCTGGAGGCGCACTTCCTTCT
GGGGGCTTATCTAGAAGTGGAAGTATGACTTTATCTAGGACTATAAGCTTGGGAAGTATG
GCATCTGGTATTGACGAAGGTGGCGATTCATTTGGAAGAGTGGAGGGACCATTAGCGACC
CTGGCTGAAGAGGACTCAACTCGTGGGAGGAGTGAAAATCAGACAAATTCTGCTCCAGAA
ACACCTCGCGCATCTAGTCGACCCATGGACCCACCTACTGACACAATCATTGCACGACAT
GTTCGCAATGTCCAAGTACCCGAATCAATGGCTAAAGACTTTCGTACGAAGCATGGCGTG
CATACACCCAGCAAGTCGGCGAGCTTTGCAGCATCCGCCCTGGGCGGCCAAAGAGCCGGT
AAAAATCTAACTTTGAAGGAACAGAGCAGCACGATCGAAAGATTATCTAAGGAGAACTTT
GATTTGAAATTGAAAGTTATGTTTCTCAGTGATCGATTAGACAAGCTTTCTGAGGAAGGT
GTGAAGGAAATGATATCCGAAAACGTTGAACTCAAGACAGGTCTAGCCGTCATGCAAAGA
GATAACAAAGCTCTCCGTAAAAAAGTAAAAGACCTTGAGAAACAACTCAAGGATGACGAA
GACCGACCATCTACAGCTCGATCGGGTACATCTACAGAAGGAAGTCAAAAGTGGTATCAA
GAAGGCGTTTTTGAACGGGAGGAAGAGCTTCTTTACCTACGAGAGAAAGTTGAAGAATAT
GTGACTGAAATTGAAAGGTTAAGGAATGAAAGTCTTGCTCGGGAAAATGAGAAGAGAAAT
CTTACGGACTTGGTTCGCACAATGGGTGAGAGACGAGGTCAAGATATCGAAACACGTGAA
GAAATGGATGTCTGGAAAGATCTCCTTGAGCAAGAAACTGCTCGCAGAGAGCAAAGTGAT
GATGAGATAAAAGTTCTCCGAGAAGAGATTTTCCGACTGAAATCAGAGACGGCTACCGGA
GGACAAGGATTGAGTCATACGACTAATATTTACAACATCACAAAGAGACGTGTCGGATCA
CCTTCGAGATCAAATTCCAATATGTCTGATCGCATGACAGATGATAGAAATGGTACATAT
AGCTCAGCAAGCACGTTAGCCGAGGAGATCAAACGGGATAATGAACAACTTCGACATGAA
AATGCAGAGCTAAGACGAGAAGTTGGCGCACAGACGTCAATGCTGACTTCAAGAAACCGC
GAAAAAGAAAGGCTCTATCAAGAAATCGAGGACTTGAAGCTTGGCCAAAGAAGAGGTGGT
ACATCGGTGGCTGGCGAGAGCATATTTGAACGATCAGCGTCACGGGCACACGAACGATCA
TCATCCAGGACTAGCGCGGGTACAAGACAGACGAGTATGAATGAGGCTGAACGGGAAGAT
TTCGAAAATAAGCAAGCCGAACTTCGAGACAGAATTAATAGTCTTAAGATACATAATCAG
GACTTACAACGTGAACTTGAATCTTGCATGGAAGATTTCGAGACCGCTGTCGAGCATAAG
AAGGAAGCCGAAGGTCTAGCTCAAGAATTACAAGAAGCCTTGGATGTTGCCGAGAATGAT
CTACTCACCATGCAAGCAGACCGAGATGAAGCACTTCAAGGTCAAGAGGAAGCCGAACTG
ATGTTTGAATCTTTACGGAAAGAAGCTCAAGAAGAGCTTGATGGTTTTGCTGCAGAACAA
GAGGAAGCCAACGCTGAGATAGAACGTCTTTCGGCTGAAGTCGCTGATGAGAAAGAGAAT
TTCAATGCATTGCAGAATGAAATGAGAGAGATGAGTGATATAGTTGTTAGGTTGGAGGAT
GATCATGAAAGAAAATCCAAAAAAATCCAAGACCTTGAAAGAGAATTGGATGAAGCAAAT
AGAGAACTTGAGGAAATCGAGAAGAACTATGTCGAATCTAACGAAAAGGTCAATCGATTG
AATGTGCAGCAAGAATCGAGTCAAAATGAAATTGCATTTCTTCGAGAAGAACAAGATGGA
GATAAAATCAAGATTGGGGATCTTGAGGCCGCTATCCGGAACTTGGAGAATGCTCTTAAT
GAAGAGCAAGAACGTGCTAGAGAACTTGATGAACGTCTTGATGAGGAAAGGCATCAAAGA
GAAGTTGTTGCTAGTCAGGAAAAGCAAGAAGTTCAACAATTCGTCAATGATCTTAATCGT
GAGGCAACGACCGCCAAGGATGAAGCTAGAAGATTACGAAAGAATCTCACTTCACGAGAA
GTTGAGGCGGCAGAGTGGAAGCAGAGGCTTATGGAACTTGAGAATAATCTCAGGGAAGCT
CTTGGTGATCTGAATGGTACCAGGTCAAGTCTATTGAATGTAAGTTTGTCTCATATTATT
CCTTTGTGGGTTCTAAACTAATTCCTACAGTCCATCGCAAAACTTCAACGCGAACTCGAG
AATACTATTCGAGATCTAGACTCCACCAAAGCTTCTCTCGCCGAAAAGGAACGTATGATC
AAACAACGTGACGACCTCTTAGAATCTCACGCTCTCGAATCACGCAAATTAGCAGATATG
CTTGACAAAGAACGACAAACCCATCGTCTCACAAAAAATCAATACGAAACATCTCAAAAA
ACATCCTCTCACACAACTCGCACTCTCTCACAACAAGAATCTCGTGTTCTAGAACTCGAA
ACTTCACGTCAACAAGATAGGAGAAAAATAGCACAGCTAGAAAATAACTTCAAAGAACAA
CTTACAGAGAGAAATAACTTACTCCTGGGCTTATGGGGTAGACTTTCAAGTCTCTGTGGA
ACCGATTGGTCCCATAATAATTCCCTTATCAATGGTCGTGCACTTCCATCTCTCGAGGCA
GTTTCTACCATGTTTCCAGGTTTCTCCAAGAACTTGTTAGCAGCAGTCAAAACAATTGAA
ACGTTAGTGGGTGATTTCAGAGGAAGAGTCAAGGATCTCGATAGAAGGTTATGGAAAGAA
TATTCGACACTTGAAAATCGATTTGAGATGCAGACTAAGAAATTGGATAGATTGGAAACG
ATGGCGAGGAGTGCAGTGCCGTTTAGTAGTATGGATAGTAGGGCGGAAGTGGTCAAATTG
AAGGATTTGAATAGGTCTTTGAAAACGGAAATTTCGAGTCTCAAGGCTGCCAATGATGTT
AGATCTAGCGCTTACGAAACTTCTACTTCGCCATCACCATCTATTCCCACTGGACCTCGT
CGTCGCATCGATAATTCTCTATCCAGATCATCGACCATGACACGTCACTCCTCTGCAGCT
TCAAATTCTCGATCTCAATCTCAAGCAAACGGGGAGATGAATACACCAACACGTGCAAGC
ACAATGACGCGAGTTGAAAGTAGTATAGGCGATCCGAGAGAAGAAGAATATAAACCTGAT
TTGCGCTGGCAAGTTAGATTACAGGAATTGGAATATAAGTTGAAGGCGGAAAGAGAAGCG
AGGAAATTGGATCGCACGAGTGCGGCGCAAAGATTGAGAGAGAAGGATAGAGAGAATAAG
GAATTGCAGGAGGAGATGGAGAGGGGAAGGGTTAGAGGAGAGAGGGGAAAGTGAAGGGAT
AAGGGAGGCTTTGAAAAGGAGAGAAAAACGTAAGGGAGGCTGAATGAAGATAGGAAGGAG
TATAGGCGTAGGTGATGGAAAAGGCGAATAGGAATAGGAATGGGAATGGGAATATAGAAT
CATGAGGGATATATCAAAGAGATGGTATAAATGGGTATGCAGGCAGGCAGATGGCGTTTT
CGGCTCTCATGATATCTTTCTTGCGTGTTTATATGTAGCGCAGCATAGCATAACACAGTA
TCGCGCGACGCGTAGCGCGGCGTTTGGCGTTTGATGAATGTTAGGTGTGGATGTGGATGC
GAAAGGCAGACAGTACTTATACATATGCAAACGAGGATGGATAGGAGAGAATGGGAAATG
AATGAAAATAAAATAAAATGAAATGCAGGTGATCATCT
>3556bdb0-5515-43b4-b92a-9a97eb10f684 (mRNA) 3480 residues [Bfab07:138785-142264 - strand] [genomic] name=Bfab07g00390.1
TCTCCTCCTCTCCCTCTGCCATCCCCTCTCTTCCCAAATCCCCCCTTCAATTCATCATCC
TGCATGATTGGCGAAGAAACATTTGCATCTCTCCATCTCCACTCGCCATCAGATGAATCG
GTAGTCGTCATATCGCCCGTGCTTTTGACCACACTTAACCTTACGTCTTACCCATACTTC
TTTCGACTCGCAACCAAAGTCAATCAATCACGATTGTGACATGAAACTTTAAAGAGATTT
TCCGAGGAGACGCGCGACGCCATTCATTCATTCATTCATTCATTCATTCATTTGTCCATC
AGTTGTCCATCAGTTGTCCATCATTTATTCATCATTTATTCATCCGTTCTTCGTTCTCAT
CTCTCACTCTTCTCCTTTCTCTCCATCCCTTCTCCACTTAATTGCAGCTGTCAACGCGGC
ACCCTCACACCAGAAAGCAGCAGGAGAGGACGGACGAACGAACGAAGAACGAACGAAGAA
CGAACGAACGAACAAGATTGTCACTCTTTCCCCCCCCCCATCATCTTTGCGGGAAATCAT
ACACTTTCCTATTCTCTACCCTCTTTTCTTTCTCTTTTCCATCGTTGTAACCTGAAACCA
CTTTCTCAAACGTCCCTTTCAATCATTGTCTTTCTTTTCCGCGCCACCCTTTCCCATTTC
AGTTAGTTTTTCACACAAAATCTAGTCTACCCGATCCTCCCGCAAACGCCGCGCCATCTC
ATTCATAGCTTCGGCTCATCGCGAATTTCCAAGCTATCCAATCCAATCCCATCCTCTCCA
CTCGCAATCAGGGTCCAGATTCAATATCGAACATCTCAATTGCCATTACGATTGCGATTG
CGATATCCATTTTCATTTCGTCAATCGGTCAATTGCTCAATTGCTCGAAAATCTATTCAA
TTTCTCTCCCTTTCCCTTCCCCTCCATTTCTCTCACAAGCAATCACACATCCTCATTGAA
GAATGCCAGTATCGTCACCCATTCTAATGGCTTATCCTGGCCCTCCGAGAAGAGCTGGAG
GCTTCATCCGATATATCATTGGCGCCATAGGAATCCTTCTCCTGGTCTTGTACTTTAGAA
GTTCGTCGGAATCGTCATCTTTCACATATACAACCCCCACAGTCCCTGATCCTCCAAAAT
CCACATTATCTCCCACGCCATACGCGGAATCTTCTTCTAACAATGAATTACCCATTTCCA
AACCAAATCAAGAGCATCCGATCGATACTTTAATCGCCAATGCAGAAACGACTTTTGAAG
AATTGTTGCAAAAAGAAAGTCATGATGTGAATGCCGCCGCCGCCGAATATCGCAAACGAC
GAGGGAGACATCCACCTCCAGGATTTGATGCGTGGTTTAAATTCGCTCAAGACAATAATG
CCGTCATGGTGGAGGATTTCTTTGATCAGATATATCATGATCTAGGTCCATACTGGGGAG
TGACGCCCGCAAGGATGAGAACACAAGCTAGAGATGCTGGCATGGTGATCAGTATTCGAA
ATGGCAATGCAACGGCAGATAGTGATTGGTTCTGGACACAGATTTGGTTGCAATTGATTG
GAACCATACAAAAAGATTTGCCAGATATGGACATTCCACTCAATGCTATGGATGAACCAA
GAATGGTGGCTCAGTGGGAATTGATTAATGCGAATATGGAAGTTGAGAGAGCGACGAGGC
AACTTGCAGATATCAATGTAGTATCTCAGGATTATGAAAGTTTGCCAGCTCCAAGACGTT
CTGGAAGTGGAGAGCCAGACGCTCCTCGAAGAGAGTGGGAAACTTCAGGTATGTTGAGAA
GATGGTGGAAGTCGCGTTCCCCTGATTGACTTTACTAGGTCCGTTTTGGAAAATTGCTAC
CAGAGGTTGTCACCCAGATAGTCTTGCACGTCGAGCGGAAGTTATGACTGACTTTTCGAA
AACGCCTGCTATTTCGATGGGCCATTCTTCTTTACATACTTTTAAAGGTTATGTTTCGAA
TTACAGTCTCTCGGCCGATTTTTGTCATCAACCAGATTTGCAATCTCTTCATGGAATGAT
GATAAATCCTCTCTCGATCTCTTCCACTCAAGAATTGTATCCTCTGTTCGGTGGTTCCAA
ACTTCCAACGAATAACGAAATTTTATTACCAGCACCCATGTATTGGGTAAAAGAAGAGAG
ATTTACAGGTGGTGATGATCATGGGGTTCCGTGGCACGCAAAATTAGATAAAGCCATTTG
GAGAGGTGTCGCTACAGGAGGACGAAACAGAGAAGATAATTGGAAAGGATTCCAACGACA
TCGCTTCGTCTCCATGACAAATCACACATCAGTATCTCGAGCCGAATCGTGGGAAGCGAT
CCCTCCCAATTTCGCTCTTCCAACTTCGATTTACAACATTGGTGCACAACAAGAAAATAG
ATTGGGAGATTGGGTAAGTGAATGGGCTGATACAGCATTTATCGAATTGATGTGTGATGA
AGACAGAAAAGATGGAACTTGTCCTTATACAGATCCATATTTCTCGATTAAGGAAGGACA
GAAAATGAGTCAACAATTCAAAAATAAGTATATTCCTGATATTGATGGCAATTCTTTCTC
GGGAAGATATAGGGGATTCCTACTTTCTTCGAGTCTACCAATCAAAGCGACTATTTTCCG
CGAATGGCACGATTCACGACTTATTGCCTGGAAGCATTTCGTACCGATGGATAATCGATA
TATGGATTTTTATGGTATCATGCAATATTTCCTAGGTTATGAAGGAGATAACTTTCGAAT
TGAAGGACACGATAAAGAGGCGGAGAGAATTGCAATGGCAGGACAAGAGTGGGCCAATAA
AGTATTAAGGAGAGAGGATATGCAGATTTATGTTTTGAGGTTATTGTTGGAGTACGCACG
CGTCTCTAATGATAATAGAGCGAATTTGGGATTCGTAAAGGATCTCTTGTGATGAGACTT
TGTAAAGAGGGGTAGGGGAAAGATGGTTGATGGAGTGGGGTGAAGAGGTTTCTTCGATTC
TGTTTCGATTTATGGACTAGGGCTTTCATTCTTTTCGGCTGGGAAACATGACTGGCATAG
GGAATTGTATGTGCATGGCATGCAAAATTGTGTTTTTGAGGAATTTAAAGCGGGTGGCGA
ATGGTGTAATGGGAATGACTCAAAAAATGAGACGGGGCTTTTTTTTTTTTTTTTTTGGTA
TCGAAAATTTCGGGAAACTTGAAAAAGGGTTTTTAGACCGAAAAGAGGAGGATGGTGGAT
AGTGAAGAAGATAAACGGGTGAAGAAGGTAAGAGGGATGTGTGTGTGTGTGTGTGTGTGT
GTGTGTCTTGAATTTTGAACGAGGATTTTCTTTTTATGATGAGCGAAAATAGGCGAAAAT
TAAGGAGGAAATGAGTACTGTACTTGGTGTGAATATACCCATAGATTAGATAGAGAGAAT
CTCGATGATGAGATGAGATGAGACGAGATGAAATGGATTAGCTTGAAAATTTCTACGGAA
>4e8789e5-51ae-446f-8ed3-b95421c27908 (mRNA) 1432 residues [Bfab07:151444-152875 - strand] [genomic] name=Bfab07g00400.1
TCGTAAACGACGCTATTGTAAGCACTCGAAGATCAACATGGGCCCCCTCTGCCTCTCTCA
CTTGTCTTTGCATGTCAAACTTGTGGTACGGAAGCGGATGGATGCAGCGATGTTTTGATA
GTAGAAATATAGAAAATGATTACTAATTGCTCGACCAACCTACGATCATGCCGTGTCCGA
ATGATATAAAAGGGGGAGTTTGTCATGGGAAGTAAAGTCTACTCCATCCATCCACTTCTT
CTTCATTCAAGATAAATCAGATCTCACACCACATTTCACCATGAACGCCCTTATTGAGTC
ATTGACAAACGGTGATGACTCCAGTCCCCATCAAGGAGTCCTAGCCTACAGAGCCCCCTC
TCTCCTCCAACCTCACAGAGCCCGTGATGCTATCCGCGATGCTCACGATGGAAAGATCGC
ACCACTAGTTGGATTCTTCGTTGCTCTACCGTCTCCACCTGTCGCAAAAGTAGCAGCTCA
ATTGGGCTATGACTGTGTATGGATTGATTGGGAACATACTTCCATGAGTGTGGAAACTAT
GACCCAAATGGTTCACGACGTTCAGTTCATGAGTGAGGGGAAGAGTTTTGCAATTGTTCG
GTATGTTCCCATATAATTTCATTCAAAAAGCTATACTGACAATATATTAGTGTATCGGGC
CATGATCACGCATCGATAGGGTATGCCCTAGATGCTGGTGCCTCCATTCTCATCCCCCAA
GTCGATACAGTAGAACAAGCCAAGCAAGTTGTATCATCTGCCAAATTCGGTGCCATTCGA
AATGGTACTCGTTCAGCACCTCCAGCTCGATACCTAATGGGTATCTCGGACACTCCTATT
GATTCCTCCAAATCTATCTGGGAAAACGTAAATAATCAAGCCGCCGTAATAATACAAATC
GAAACTCTCCAGGCAATCCACAATCTCGATGCTATTCTTACCGAATGCGGCGAACATATT
GATTCTGTCTGGCTAGGCTCATTGGATGCGAGGATTAGCATGGGACTGCCTGGTATGGGG
GGCTCGGAGAAGGAATGGACTGATGCAGTTGCGCTTTATGAAAGTACATTGGCCAAGCAT
AACAAACCTTCCAGCGGACTGGCTATGGGCTTTAACGTGGATGATAAGATAGCGATGGCA
AGAGGTAAAAGTTTGGTAGTCAGTGGGAGTGATATCTTTCCGTTGATGATGCAGGCGACT
GAGGCAAAACAAATGCATGCAGGTTTGAAGGCTCACGATCATAAGGGAATTTACAAGATA
TTGTAAGAGCTAGGTGGAGAAGTCTGTACATTGTGGTATTCGGCCACTGATAGAACATTG
CGAGTGGGAGAAGCACAATGATGTAATTTTAGAGATTAAGCTATTGAAAATCTATGCTCA
CTGAGGTTATTTTCTACCCCGTCCTACAGTTAATGTTCAACTCCCTTCTATA
>adc04922-1de7-46a7-86a2-12685ba47c3a (mRNA) 980 residues [Bfab07:156820-157799 - strand] [genomic] name=Bfab07g00410.1
AGATGGCTATTGATAATCTTTAATCCTCTCAATTCAATCGTACAACCACGCGGAATTACA
CAACCTCAGACTTCTACAATGTCTCTACTAGAAAGACATCTGGAACAGATTGCTCTGTCG
GCAGATTCAATAGCTTCCTTACCGTAAGTAACTGCTCCTCTCATTCAAGCCAATTCGAGC
TACTGACCCCGCTACCACAGCTTTCCCCCTCCTCAGATCTTTACCAATGCTCTTCTCTCC
AACCAAGACATTACCGCCCTAATTCGCGACACCGAACCTCACGAACGCGCTCTCTTTTCT
GTTCCTCCACCCCCACCACCTCCAACCCAAATAGCTCCCGAGCCCAAACCATCCAAGTCC
CGTCGCCAAACAGTCTTCAACGTAACATCCGGCGAAGTAGCCCCTGCATCTGGTCCTAAC
GGTCGAGCACCTCGACGGAACACTGCTGTCGCCGCTGTACTTGGCGCAGAATTGCATTCT
CAGGTTCGCAAAACTGAGACGGGGAAGGGGGAAATTGATATCGAGGTTTTATTGAAGGGA
GCGGAGAAATTAAATGGGGTATATCCTGTACAAGGGGTCCCTGAGAGGATAAGAGGATTG
AGAAGTAGATATGCACAATTAAGAGAGAGCTTGAAACGACACGAACAGAAGGTGCAGAAA
CAAACGAGAGAATTGGAGAGGATGAATAGGGGGAATGGTGCTGAGAGTGGTGAGGAGGAG
AATCAGCAGGTGAATGAGGAACCTTCGGAGATAGAGATCACGGATGAGGATTTGAGGAGA
GAGGAGAGAGAGATCAGGGAGCTGGAGAGGAAGAAGAAGGCGTTGGAAGAGAGAGTAACT
GGGATGGAAAGAGATCTAGGAGGACTACTGAGATGAGCTCCATGTACTGATCCTGAGCAT
GGTGGGATGAGTATCTCCACTTGACTTCATGATTTATGAGGCTGCATATTTTTTGATACC
CGGATTATGGAGTTGTTGTC
>9e1e57cf-072b-46a1-aa8e-f4971cd22a2a (mRNA) 1636 residues [Bfab07:159382-161017 + strand] [genomic] name=Bfab07g00420.1
TCAACCAGGACCTGGTCCCTTCAGATCCCTCGTTAGCCAGCTCTGAGACCGGACTTGTCC
CCTTTTGACGGTTGACGATAGCCTCGAATCCCTAATTGCGAGGCTTCTTGGCGCCCCAAG
CTCATCTCGAGATTATCATGAACTGTGACCCTCCAGATCATCCTTCTCCTGCCAGGAGAG
ATTCACCACCAGTTCTTACACCTTGACCCCAATCGCAACATACACACCTTTTACACGCAG
AACACAAACCACTGATCACTTTCATCTACTCGAGGAATTACAAAATCGCAGTTGTCAAAC
ATGCGACCTACGACTCCCAATTTCAATTTCGCTCAAAGTGTCGGCCCTTCGTCACCACCC
GAGACCCCGACTAATTCCACCTTTGCCTTTGCACCTCAACGACCATCAATGAACTTTCCC
CGTTCATCGCCTAAAACAAATGGGATTATACCCAATGGTCCAGGGCCTCACTTCAGCTAC
AATCGAGTCGAGAACTTATCTCCACGATCTACTTCTCCCTCGTCAGAATCTTCGGGCAGC
GCAAGTCCGCCGCGATCAGAGAGTTCCCAACGCGCGCAATCACCACTCTCATCGCCTATC
CACAGGCACTCGCGAGTAGTAGAAAAGGGAAATTTCACACTGGAAGAAATAACAGACAGC
GATCTCGAGGGCTACGATTGCGACGAGGGACTTATAATACGACCCCACCAATACGAAGAC
GCCGAGTCCGATGGAGGACATGTTGCGCCTATATCTACACCAGCCGAGCTCGATGCACGT
TTCCTCGATGATTTACGCGATCTCACTGCACACGACGGCACGGACGCATTTAACAACGAA
GAGCAAGATGGCTCCCCATTGGATGAGTACGAAGCTTGGGTACAGCGCAATCGGGAAGAA
CGTCGTCGCCGTCGTCGCAGTTCAGCTACTGTACAAAAACGATCACTAGCGCAAAGTATT
GGGAGTGATACTGACGATGAGGATTTAAAGCCAGATCACATTAGCGCAAATGAGGCCGGA
TCTAGTGCTAGGAGACTACGAAGAAAAACGTTTAATCATGGGGGAGACAAACGAGCGAGT
CTTATATTTGACGATCCACCACCCCGGATTCCAGAATTGGAAGAACCAGATAGTTGCGAG
GAAGTGCTCGAAGATGATACAGAATTGGATGATTTAAAGGAGTTGCCATATTATGTTTTG
GATGAATCTATGGATATCGACTCTTCTTCTTGAGAGCAATAAGACTTCAAGGACATAAAT
AATCTGTGGTGAAAGAGGGTGAAGGGGTGCAGATCGGCGGGCATGGATATAAAAGGGGGT
GACGAATTAATGAATAATGAATAAGGCGGCATTCCATTGCATTAAGGCATGATATATATG
ACGGTGGCATATTATTTTCTACATTTTTTGAGCGAGCGACTTATCACTAGGTGGATTTCT
TCTGATATTTGGTCAATTATTCATTCGTATCACACATAGCGTTGCATAGCAGATGTAAGG
ATAGCGGTACTGGCCAATAGAGCCCGGGAATCTGGTCTGGAACTCATGGCTTCGGGGGTT
ATTTTATAGACTGGGTGAGGGAGAGGATGAAACCATCGTAGGAAAACATATAGGAGAATA
CAAATAGATATACCTT
>9f7d58c3-8c4d-4c48-8e4c-eae9c08e2455 (mRNA) 2845 residues [Bfab07:161862-164706 + strand] [genomic] name=Bfab07g00430.1
AATCCGCATTTATCAGACCTTCGACGCCCTTTAACAGAAGAACACATATGATTACATTAA
CCAATAGAGACGGCTCTTAGTGTTATCATTTAAATTCCTTGCTAATCATCACCAACATGA
ATAATAATATCCTTCCAAACCAGGGTCAGCCTGGGGGTTCGCAACCTCCTCGACCACAGA
CATTGTTCAAGCCCGAAATGATGCGCCAACTACCTGCGAATGTTTTTACAGAAGAGGAGA
AGGTTAAATGGGAACATGGATTGAAAGGACTTTGGTCTCATATTGAAAATAACCCTCCTG
AATCATCAGCACATCAAGAAGCCAAGCGCAAATTGGTTGAGTTTTCGAAGTCAGTATCAT
CCAGGATATTGCAATATCGCACGCAGCAGCAACAGCAACAGCGCCAGATGCAAGCCCAGC
AGAACCAACAGAATCAACAAAACCAGCAGAGTCAGCAGAACCAGGCGCAAGCTCAGCAGG
TTCAACAGAATCAACAGACTCAGCAACAGAATCAGCGAAGCCCGCAGGCGCAACAAGCAT
CACAACCTACAACCGCTCCATCAAATGAGACACCTCAACAAGATCCAGCTTCACAACAGC
AGGAACAAGCCACACAATCACAGGATAATCAAGCGACTGGTTTCAATGCTGGAACTTCTT
CTCAACAACAAGCAAGGCCTCAAATTGCTGCTCAAATACCAGAGAAGATCCTGCAACACG
TCAGAACATTTCCATGGCATGCCCCACAACACCTAACCCCACAATCACCAGAATGGACTA
AATGGATGGCGGATATGAAGAACAAGTATGCAAAGGGCTTGATGCAGATGGAAAAGACAA
ATTTGCAGGCGAAGAGTATGGAAGATTATATTAGAAAGAAGAGAGAAGAAGGGACTGCAA
CGGAACAAGATGAAGCAGACCACCAGACGAGATTAGCAGAGGTTAAAAAACAACATCATA
TGGCCAAGAAGTTCGTAGATGACATTAGAGAGGGTCAGAAACGTCTCGCGCCAGGAAACC
CTCATCAAGGTCAAACTCAGCATCCTCAACAAACCCAAGCTCCTGCGCCTGGGTCATCCA
ATGCAAATGCGAATGGGAATGCAGATGCTACTGCAAGCCAGGGCAACCAAGGAGCTCAAG
GTACCACCCAAATGAATCAAACACAAGGAGCACCTAGGCCACCTATGAATTTGCAGCAGC
CACAAAACCCAGCCTTACAGAATACTCAGACTGTCAATGCTGCTATTGAGCAAGCTCGTA
ACCAACAAATGGGTGGTGGTAATCGACCTCCTGGGCCACAAGGACAGCCATCCCAAGGTC
CACAAGTTCCTACGCCAAACGCACCTTCCCATCCACCTATGCCTCAATCTCAACCTGGAC
AGGCGCAAAGTATTAAAAGCGAGCCAACAATGCCAGGTCCAATCAACACCGCCATTAATC
AAATGCAAAATAACCAGCAACGTCCGAGTCAAACAAATTCTCCTCAATCGGCTATTCCTC
AATCAGCAAATTCTATCAGTGCACCACATCCACCTGGACCTCCGAGAGCTTTAACCCATC
AAGCGGCATTGCAAACTGCAGCTCAAAGTTATTCTAGCGCGGGCGGTCAAACGACCACAC
CTAATACGGTCATGGGTCACTCGCACACTCACCCTAATACTATGCCCAGGGAACAACAAA
ATCCAAGCTCAACGAAACTTCCAATTCCAAAACATTTGCCAGAAAGAGCAATCGCACCCC
CACAACCTGTCCAAATGGGCCAATCACGTCCTTCATTTACTGGTGGTCCATCAGGTGCTG
GTAACGGAGTTATGGGTCAGCCAGTTATTGCCAAGACTCCAGGTTACGTTCTGGATGGCG
AGGGAGACCGCGTTTTGAGTAAGAAAAAATTAGACGAGCTGGTTAGACAAGTGACCGGTG
GTGGAGAGAATATCGCAGGTGGTGGTCTGACTGCTGAAGTTGAAGAGGTATGACATTTTC
CCTGTATTTCCATTACGTTGATTTTCAAGCTCGTCCTTATTACCCCGTCGCAAACATATG
ATCCTCCATGTCTACGAACTGGTTGAAGTTCATGTAAACTAACACGATCTACTAGTCCAT
CCTTACAGTCGCCGATAACTTCGTCGATCAAGTCCTTCAAGCCGCATGTAAGAATGCCAA
GGAACGTGGCTCCAAAATTTTGGAGATCCGTGATATTCAACTCACTCTTGAGCGCGGTTA
CAATATTCGTATTCCAGGTTACGCTAGTGATGAGATTCGAACCGTCCGTAAGATCGCACC
AAGCTCTGGATGGATCAACAAGATGAGCGCCGTTCAAGCTGCGAAGGTCACGGGTGGAAA
GGGTAGTGATTAAAAGCATTGTCCATGATTTCAGGAGGCGTTGTTTTCAATCGATCCAGG
ATGTACGATATGTCTACATCACTTCGCAATGGTTATCCGAATTGACGAAAAGGAATATGA
TAATTATGGATATGAATCGGGATAAATTTCTTAGGGGACACTACACTATGAGGGCATGGG
ATGGATGATAATTGGTGTTGGGCTGTTTCATCTTAAATTGATGTGTATATGGCATGGACT
GTCGCTGGCGTTGGAGGAGTGGTATCATGATGTTATGAAAGCATCATCTGTATTCTCTCT
GGGTATGTGTCGGTCTTCAAAGACAGGTACAAAGATACTACCTAAATACCATAACACTCC
ATAAATCTTGATACATGTTCACTATGATGTGGTGTGCATGATGGTGATGTGACGTTAGAT
AACGTGTCCATCGCCGTTCTTTACCACTGGCGTAGATTGCAAATTTTTTAGACTGAATCT
TATTGTAATGGCTTCTAAATAGGAG
>3d30966c-218d-4d6e-9ffc-990699178529 (mRNA) 2498 residues [Bfab07:165255-167752 + strand] [genomic] name=Bfab07g00440.1
AACTACATAACACCCTTTTTAATCAATAACTCTTTCAAGCTCCTTCAATACCTTGTACTC
ACAGAGCGATATTCTGTGAATAAGAGACCGATTATACCACTTTTAAATACATCCAACGCG
ACTTGAAGAAAGGTATCTTAGCTCTACCACCCACCAGTCTAGGTTTAGAGAGGGCGACGT
CAACTTTCGAATATACTCTTTATTTCGCAGTTATGCCTGGCAAAACACCATACAAGAAGG
GCACCGATCCAGTCGAAAATGGTATCAACGGTACAAAGAAGGATGATGCAAAGAGCTCAT
TGAAGGGTGAAAAGGGAAAGAGGACCAAGGAAGGCGAGGAGGAGATGACAGTCGTCGTAC
CACCTTCAAAGAGTTCGAAACTATCAGCTCCTCCTCCGAAAGACGGTGATGGAGATGTAG
CTATGGATGGCTCTGCGGAGGGTGAAGAGGGCGCAGGTGTTGAGAAGGTTGATCCGGTGG
CCAAGGCTGTTGCAGGTAAGTCAAGCAATCACCCAACATATATAAGTTTCTATCCACCAA
CAAGAACTAACATTTTACTCCTTTTATTAGATATCAAGAGCAATTTCCCATTATTAGAGA
AAGCTGTTGCTTTGTTTGATGCTAGATACACACTCCGAGCCCTCAGATCTATTTCCTCTA
TTCGAAAACATCTTACAGCTGATATTCTGGCGCAAGTTATTACAGAAACTTACCCTACAG
CAACTCAACAAGCAAAGGCTTTACTCATTGGTATCGACAGAGAGAATGCCGCATTTAACA
AGGCATCACCAAGTGAGATGGAAATTGACTCTGATTCAAAATCTGCCAAAAACGGGAAGA
AGGAACCGAAAGAAATCATTCCAGAGATTGATATTTTCCTAAGCATTCTCGTACAAATCT
TCTTCCTCGATAATAAGATGAATGAGAAGGGCTTCACACTTTCCAAGCATGTCACAACAG
TCATTCATGGACTCAACCGCCGAACTCTGGATTCTCTCTCCGCTCGCGTGTACTTTTACT
GGTCTTTGTTCGCTGAACAATTGGCACCACTTCCACCTTCTCCCGCTTCCCCAATTGTTG
CTATTCGACCAGCCCTTCTTTCTGGCTTACGGACTGCTGTTCTCCGCAAAGACATCGACA
CTCAATCAACTGTTATCGTACTTCTTCTACGAAATTATCTATCAACCTCTCATATCACTC
AAGCTGATCTTCTCATCTCGCATACTAAATTCCCTGAAAGCGCCTCGAACAACCAAGTTG
CAAGATATTTATACTACTTGGGACGAATCAGGGCCATTCAATTGAGATACACTGAGGCCC
ATGAACATTTGACAGCCGCAACTCGCAAAGCTCCTTCAAGTCCGAGTGCTGCAGGATTCT
CACAAACTGCGACGAAGTTACTTCTTGTGGTTGAGTTGTTGATGGGAGATATTCCTGACC
GTGCAACATTCAGAATTGCTAGTCTCGAGCGTGCTTTACAACCCTATCTTAACCTCGTTC
AAGCAGTTCGAGTAGGTTTGATTGCAGAATTCGAGGCTGTGATTACTCAACATGCAGAGA
CTTTCAGACGTGATGGCACTTATACCTTGATCCTTCGTTTACGACAAAACGTCATTAAAA
CTGGTATTCGAATGATGTCCTTGTCCTACTCAAGGATCTCTCTTCGAGATATCTGCATAC
GCCTGAAGCTTAACAGCGAGGAATCTGCGGAGTATATCGTTGCAAAGGCAATTCGTGATG
GTGTCATTGAGGCAACTTTGGATCGTGAGAAGGGATTCATGAAGAGTAAGGAAGTTGGAG
ATGTTTATGCTACTAGGGAGCCTGGTGAAGCATTCCATGATCGTATTCGTGCTTGTCTTG
CTCTTCATGATGAGAGTGTTAAGGTATGTTTTCTTCTCTTATCATACTGTAGCAAAATTT
ACATACTAAATGGTATAACCACAGGCTATGAGATTCCCAATGAATCAACATCGATTGGAA
CTCAAGAATGCTCAAGAAGCAAGAGAACGCGAACGCGAAATGGCAAAGGAGATTCAAGAT
GGTGATTTGGATGAAGATGACCTTAGCGGAGACTTCGAAGGCATGTAAGATGAGAATCGA
GGAGTGAAATGGAAGCCTTTTGAAGATGTATACAAACCCGAATGCGAATGCAACTTGTAG
CATGAGATGGTGAAGGGAAGGGAGAGAATTGGTTTGGTGGCACCTCACACACTTCTACCA
GAACTTGTTTTGCTACTATTACCTCGTTCCCAATCTGGGATTTCTTTCTAAGAGTTGAGA
AAATTACAACCTACGACATACAGATGGCGGAAGGTTGGAGATTGGACCATGAAATGAAGG
AAATTCCACTGCTACATTAGTTTTTTTTACTTTCCGCACTTTAACTGAACTTTATTTGCA
TGCGAGGCAACGCATTTGGACGTACAATATCTATGCAGATGCTGGCCGGGGGTTAATGAT
TAGAAGTGTTATCTCTGTACAATGACAATCTTTTTGAT
>3aecfbaf-852c-45eb-b78b-23bca0ea8aac (mRNA) 2988 residues [Bfab07:168133-171120 + strand] [genomic] name=Bfab07g00450.1
AAAAAAGGTTCAAACTTTTAATTTTCTCCCAATAAATATCTATAAAAGTGGCAGCTGTGA
TCAAGAGCTGGAACATTACACTGCAAGCTTCAGAGTCTACGAACACAATTCTACCTCGTC
ACGAACAAAACGAGCAAATATTGACACAGCGCATACTAATTGACGGTCCTGATTCGAACT
GCAGATAGGTTTAATCATCTCAGATTTACGACAATAAATCTGTTGGGGATAACAAGCAGC
CTACGAGATTATACCACAAGAAGAACTGTGATTCAATCCATTGCAAAGACGGCAATAGCG
ACGAGGTTTCAACCCAATCACAGCGGGAGTTGTTCTATACTATTGCGATATACTATCAAG
GTCGTAATCCAATTACATCTCAATCTCGAAATTCTGAAATCAATTAACAACTTTGAGTGT
GGTGGATTTCACAGTTTGATCTTACCACCAGGGGCTTCTGAGCTATTAACTCCCAATTTC
AACCACACATCGGAGAAAGTGCGATACGATGCCACCACGAACCCTCCGAAAACGCTCGCA
TAGAGCAAGCTCACGCGATCCGCATTCTAATACAAATATGAATGCAGACCCGAGCGCAAA
TGCAAATACAAATACGACTGGTTCACCAAATACAACCACGGTACGAACTACGACGACAAC
TACTACTACAATGATGGTTGATAAGGATGGTGTTGAGGTTGAGGGTAGTAGGAGAGTTAG
TGGGGGGAGGACAAGTACTGGTGGGAGAACAAGTATTGGTTCCGGAGAGAAAAGACAGAG
GGGATTGGCGGAATTTGGTATTACGAGAAGTCCGCATCCGCAAGGAAAGAAACGCACGCG
TGAGGTCGAGAAAGAGGAAGAGGGAGAGGGAGAGGGAGATGAGGTTGGGAATACTGTGAA
TGGTGGAAGCATGGCGAATGGAACGAATGGAACAATAATTGGTCCAATGAGCTCTACCCA
AGATCAAGAGCATATAAATACACCCAAACGCAGAAGAATCAGCACAACAAATCGTGTAAA
CGGCTCGATTACTGTTACCGGAACCGGAGGTAGAGAAACACCAAGGGAAAGAACTAGGGA
AAGAGATGTTACAGTCAGCATGGAAAATTCACTGCCGTCGCCGCCTGCTGAAGCAGGCGA
TAATGAGCACAATGTGAATTCGGTGGAGGGTGATATTGGAAGAAGTTCCCCCTTAGAAAA
TAATAGGGCTGGAAGTACTGGTACAGAGACGGAGACGGCAAAGAATGAGAAAGAGAATGA
GGAAGAAAAGGATGAACAAAGGGAAAGAAATATCGATGAAGTCGTTTTTGGAGATTTATG
CTTCAAGAGTTGGTATTCCAGTTTTTATACCCGCGATGTCGTCGGAAATGGAATGATAGA
AAATCATTCTCAGAGTGTTAGTCAAGGAAGTGGGAAAAGCAGTAAGAGTGGAAAAAGTGG
AAAGAGTGGCAAGAGTGGAAAGAGTGGAAAGAGTGGAAAAGGGGGGGAGAGAGATTCGAG
AGGACCAAAGGGTTTGCAGGTTGATAGATTATTTGTCTGCAATTGGTGCTTTGGATATAC
AGTCCATGGGGGAGAAATGGCGAAACATAGAGAATGCTGTGAGCGTGAAGGAAGAGTGCC
CGGAAATTGTGTTTATGAACATGATGAGAATGGGGAATGGAGTGTTTGGGAGGTAGATGG
GGATGTTGAGGGTGTAAGTTTTCTTCTTTTCCTCCTGGCTGTTCTGGTTGCACTTCTATA
TCAACACCACTCGAGAAATCCGTACTAATATCGCCACAAAGACATTTTCACAGTCCCTGT
CCCTCTTCGCCAAACTCTTCCTGGACAATAAATCAGTTCTCTACGATGTGCAGTCGTTCA
ATTATTTCCTTCTCGTCCACACCAATCCCAGTACGAAAGAACAACAAATCGTAGGATTCT
TCTCGAAGGAAAAGATGTCATGGGATAACAATAATCTAGCTTGCATTCTTGTTTTTCCTC
CATGGCAAAAGAAAGGACTGGGGAGTATCTTAATAGGCACAAGTTACGAAATCAGTAGGA
GAGAAGGGCTACTTGGAGGACCAGAAAAACCAATTAGTGAGTTGGGGAAGAAAGGTTATG
GAAGATTCTGGGGGGCAGAGGTAGCGAGATGGTTGTTAGAATGTGAGGTTGGTGTGGATA
CTTTGATGGGAGAGGAGGAGGTGGAGGAGGAGGAAGAGGAGCTTGATGTCGAGGTGATTA
AAGTGGAAAAGAAACCACCGGCGAAGAAGCCATCGGGGAAGGGAATGGGAAAGGGTTGGA
GGAAGGGTATGAAGGGTGTAGGCATGCAACCTCAATCTCTTTCTCAATCTTCCTCTCAGC
CGAAGGAAATCCCAGCACCAGCACCCAAATTAACACCAAAAGCAACAAAATCAGCGCCAA
AGTTGCCCGTAACACCACCTATGGAAGATACCTGCGGAGCAACTACTGTAGAAGCTATTA
GTAAAGGCACATGGATAGCGGTAGACGATGTTCTTGGGGTTCTTAGATCAATGGGCGTAC
TTGAAAAAGTCGGTAGCTCAAACAGAGAGAAATCGGGAAAGAAATATAAAGTCAAAGTAG
ATAAAGAACAAATCCGCAAGTGGATAGAGAAAGAGGGATTGAGTTTGGAGAAGTGTGTAA
GGGAAGAGGGGTTTGTGGAGGGGTATGGATATGCGGTTAGCGATGCCAGTGGAGTTAGTG
GGGAGGAGAGCTTGATGGAAAGTATTGAGGGGAGTGGGGAAGAGGTTGATGAGGCAGGAG
ATGAGGATGAGTTGGCATGATAGAAGCTGAAGGAGCATGGTATAAACCGGGATTGGTGTT
TCGGTGTCTTTGGTGATAAAATTTGGGGGACTGAATTCGGTCGGAGTTGGTTAGGCTCGT
GGGGACTCATCCGTTTGGATCCAGTTTATTGTTTATTAGATATCATAGCGGGAGTCGTTT
TCAACCTAAGGCTAAATATATAAGTGCATTTATTTTATTTACTCTAGC
>e5f41261-d146-4c94-924f-555abb29805d (mRNA) 631 residues [Bfab07:173534-174164 + strand] [genomic] name=Bfab07g00460.1
AACTGTAATCATCTTTTTCTTTGATCCTTGAGATCCCCCATCATGCTGGGTAGAAAGATT
ATCAATGGCTCTATAACAATCTCGCGATCCGCGATTTTCTTACCCAAGAATTCAATGCAC
ATGAGGTTGCCAGCCCGTGGCACTCTGGCTTCGGCTTTTATGTCTCGAGAATATCATGAT
GATGTAATTCCAAATTCCAGGCCGAAAATGACTGCAGAGGAGAAAACAGCAGTGAAGGAT
GCAGAGGGGCCAAACATTGAGAGGTCAGCTGGAGTGGCGAGAAATAAGGTAGATGGAAAC
AATGGGGAGAAGTCCGAAAAGAGGAGGAAGACAATTGCGGAAATGGATGAAGAGTTAAGG
GCGAAGATGGAAGGAAGAGAGGGTGCAGCTGGGGTTTCGTATGAAGGAGGAAAGCCGGTG
ACCGATGGATTTGGTAGGGGAGTGAAGAGTAACATGTTCAGGGTCATTTGAGGAGGTCAA
GGTTAAGTTTGCATGGAAGTAGTGGAGGAGAAAAGTCCCAGTGGAATAGAACGATGAAGA
AGTGAGAGCTTGGGGCTTCACAATAGACAAATGCCGAAGTCTATATTGCATTACTGCAAT
GTCAAACTATTCACACTGTCAACGAAACTCG
>efda60f1-25f2-4745-9ed5-a603d9f39bf1 (mRNA) 1278 residues [Bfab07:181801-183078 + strand] [genomic] name=Bfab07g00470.1
AGATTGATATATCACCCTTTATTATAAATCCTACCGAATGAATTGTTGACAGATATTTTA
CATCTTTGATCTTTTACCACTTCCAACCTTTACAATTCAAAAACACATAGAACAAAACTC
GAGTCTACTCCTATACATCAGTTACGAGACATATTTCATCATTCGCAATCGCAAACGTCA
AAATGGTATGTACTTCCACTTTTCCCCTCGTATGGATTTTTTGGGGACACTTTGTTTTTC
CAAATGATCATTCGGTTTATAACTCTTCTCTGCTTGTCCCAATTCGCATTTAATACTTCT
TGGAAAGACCCCAATCTCTATCCCGGATCCTTAAACTCTTAAACCCTCAAACTAACCCTC
TTCCATAGGTTCAAACACCCACCCAACGCAAAGCCAATCTCAAGTTCGCTGCCGTCAATG
AGAACAAGCAAGGAAAATCAGAAGCTCAATTGCACAAGAAGGAGTTGAAGAAACAGAAGA
GCCCTATTAGTAAGGGTTGGCTATGTAGGTTTTGATTTCTCATTGTCTTTTCTTCATGGA
AGGGAATAGGGAAAAGGAATTGGGACCTGCGGAGGAGAGGCGGGAAGCTTGAAGGTCTGG
AAAGAGGGGCGAATTAAGAAGAAGTTCGATTGGCGTGGGAAAGGGGCGTTTCTCAATCGC
TCATCGAATGCCTTTTCTTTTAATAAAAAGATGTGGATAGAAGCAGAAGTTCCATGGACA
GATAGGAATAAGTCACAGCCTAGCGGAATGTGCTTCATGAAGGAATTCCGAGGGATCTCA
CTATGCGCGAGACTCAAGCTAACAACCCAATCAATAGACCTTTTCGCATTCATCCTCATT
GGCGGATTATTTGTCGATCTCCTTTTCCGCGTAGTCTCCTATTTCAGCGGCGGTAAATAA
GCGCATTACATTCTATCTTATTCAGTTCATCTATTCGAGTCTCGCGACCATATATGCCAA
CTAAAAACGGAGGAACTGTGGATTTTCATTGTATACAACTCAGATCATGTCGCGTGGACG
GAAGCTCACGAGCTATCGGTATTCTAGGGGTTGGACTTAGTCTGCAATTGAGAAATGCAA
TTGCGAGATTTGTGGATGGGAGTTTTATTTGGGTCTCGTTTTGTTATTCCATTTTTTGTA
TCCGTTAAAATTAATCGGATTTCGATGGTCAAGGGGGTTTTTCATATGGGATCAATATCA
ATGAATGATTGATTTAGCGCTCCATAATTCTCTGTCATGTCAATTGAACAAATTTCAAGT
TCGGAAATATTCCCCGGG
>50131f00-7c1d-4715-b7ab-4dcd688c8d02 (mRNA) 3703 residues [Bfab07:185869-189571 - strand] [genomic] name=Bfab07g00490.1
TTACAACATTGGAATAATTATATCCATTTCCTGACTCCACCAAATTCCAGGAAGCCTCAA
GTCATGCGCGTCGTATCTACTGGACATCCAACGTTCCCATAACCAATTTCTTAATGGAGG
ACCACTCAATACAAATATAAGCCGTTAAAGATGTACGCCCTTGCTGGGAATGACCGTACT
TTCATCCAGGATAATGTACTAAAGCTTTAGCAGGTTCGAAAAGTCCTTGTATGACCTCAT
TCGAGGTCTGCGAAACCACAAAGGCAACGAGAAGGAATACATTCAAAATAGCTTGAAAGA
ATGTCGTGCGGAAATCAAAGGGTCCGACATGGGTTAGAATCTATGGCAGAAGGAAGGGGT
GCATCTTAGCTGACAGATACAACGCAGACCTCAAGGCTACTGCCTTGCTGAAACTGGTTT
ACCTGGAAATGTTTGGACATGATATGTCATGGGCTTCCTTTCATGTTCTCGAAGTCATGT
CCTCGCCAAAATACCTGCAGAAGCGAGTCGGATATTTGGGCGCTGTGCAGAGCTTCCGAC
CGGATACTGAAGTTCTAATGCTGGCTACAAATCTCTTGAAGAAGGTACGAAATCCCATAT
GATTCTTAAGTATTCTACTGAGGCATATACAGGATTTGAGTTCCGCGACACCGATGACAA
TGTCTCTACCAATCATAACGTTACCGCATGTCATTACTCCTTCACTTGCACTATCGGTTC
TCTCAGACTTATTACCTCGAATGACACATTCCCATCCAACGATTCGCAAGAAGACCATTG
TTACACTTTATAGACTGGCTTTAGTCTACCCAGAAACATTACGTCCGGCATGGCCAAAAA
TAAAAGAGCGATTAATGGATGAGGGCGAAGATCCAAGTGTTACAGCTGCAATTGTCAATG
TGGTTTGCGAATTGGGATGGCGGAGACCTCAAGACTTTTTACCACTCGCTCCGAGGTTAT
TCGAGCTCCTTGTTGATAGTGGAAATAATTGGATGGCCATCAAACTCATTAAATTGGTCA
GTTCTAGATTTCGTATCAGAAACTGTATATTGACATACGTCTAGTTCGCTACCTTGACTC
CCCTTGAGCCAAGATTGGTCAAAAAACTTTTACCACCACTTACATCTATCATACGAACCA
CTCCAGCAATGTCACTGCTATATGAATGCATAAATGGCATTATATTAGGCGGAATTCTAG
GAAGCAGTGAGGAATCCGCAGGCGGGGAAGAAATAGCATCTCTTTGTGTGAGCAAGTTGC
GTGGCATGATTATGGTTGAAGGAGATCCTAATCGTAAGTATTGAGTTCCTGAGCAAGGGA
CCGATGCTAAAAATTCAAAGTAAAATATGTCGCTCTACTCGCTTTCAACAAGATTGTTGT
TACTCACTCATTTCTTGTCGCCCAACAAGAAGATGTAATAATGGACTGTATCGATAGCCC
TGATATCTCAATTCGCTTACGCGCATTAGACTTAGTTGTAGGTATGGTCAGCAGCGACAA
TCTGATGTCGATTGTTGGGAGATTGATGAGACAACTTCGGAGTTCCCCCTCAGTGCCTGC
AAATAGTTCAAATCCTCGACCAGCTGGGCACATTGAGCCCGAAGCAGATTCAGACGATGA
GGCCCCGGAAGTTGCGATCAAGTCTGATAGAGGGTCATCACAAGATCTGTTATTGCCTGA
TGACTACAAGGTGGATGTCATCACCAGAATACTCCAAATGTGCTCGATAAACAATTATGC
TAATCTCGTCGATTTTGACTGGTATATCGACATTTTAATTCAACTCGTCAGAAACGCTCC
TATCACAAATGCGACCTCAAACCAAGAAATGGATGAATCCTCAGATGACGATATTTCTGA
AAAAATCGGAGATGAATTGCGAAATGTCGCCGTCAAGGTAAAAGCAGTCCGATCTCAAGC
GGCCAGAGCCGCCGACTCAATACTGATACTAGCTTTTAACGATACTTCGAGTCAAGTTAG
CTCCGGAAATGGAGCGCTTCGTCCGATATCATGGATGATTGGAGAGTATGCTTCTTATCT
GGAGTCCCCAGAAAATACAATGGCAGCCTTACTGCATATTGCCAAGGTTTCGACGTCTGC
TGAGAGTCTCATTGTATACCTCCAAGCACTGCCAAAGGTTTTTGCGATCATAGCTGATGA
CGAGCGTTCATTATGGACAGTTGAACGAAAGACAATGATGTCACTTTTAATGGCACGTAT
TATAAATGCCATTGAACCCCTAGCAATGCACCCCGATTTGGAGGTACAGGAGAGGGCGGT
TGAGTTCTCAGAGCTGTTAAAGCTAGCAGCGGAAGCAACAAATGGTCAAGAGCCGTCCTC
GGACTCGGTTCAGCAAGATGCACCGCTTCTACTTACACAAGCACTCCCTTCTCTATTCAG
GGGCCAAGAATTAAACTCTGTTGCAGCGAGTGCGCAGAAAAATGTTCCCTTGCCATCTAA
TTTGGACCTTGATCAGCCAATCAATCCAAATTTGCACAACCTATTGCGCAATGTAGACAC
GATATCCTTTGATGAGCCCGAAAACGACGAATTCGAAGTCTATTATCATCAGAAACCAGA
GCCTACTTCAATGTCATCAAATGGGCCTGCTATTAATCGTCTTGGCGGAAGTCCCGACCA
ACCTGCTCAGTCCTATCAACAAGGCAGCGAAGAGTCATACCTAGATCCAGATATTGTTGC
GCGACGGAAAGCGGAAAGACTTGAAAGAAACAAAGACGACCCCTTTTATATCGCACTAAA
TGATGGCAGTATCTCTGGTACTTCGACGCCTCTTCATAACATTATTCAAAGCAACAATGG
GCCAGATTTAGACATCGATGCCATACCAATTATGCAGCTAGACCTAGGAAAGACGAATCT
AAACACAACAAACACTAAAAAGCCCTCAAAAAAGCCTCGTCAACGAATACAAGTGGCTGC
CGATGAGACTTTGAACATGAGTGGAACTTCTACGCCTGCAAACGATTCTGAGAACAGTAC
TGATGGACCCATGAAGGCGCGAATGGCAAAAGGGAAACAATCCCTTTTGCAAGTAGACTC
GAGCCATATCGGCCAATTTTCCCTTGAGGGTGACAATACTAGCGGGATTGATTTCGAAAG
GCAGCAGAAAGAGGATGCTGAGATGGTAAAGGCCATGAAAGAAGTAGAAAGACTTCGATT
GGAGATGCAGCGGGCGAATGAGAGAATCCACGCTGCACAAGATGTTCCACCAGAAGGAAC
GGTGGTGAAAAAGAAGACGAAGAAGAAGGCCAAACCACTAGAAGGCGAAGAAGTAGCGAC
AGTGATTAAGAAAAAGAAAAAGGCCAAGAAAGCTGTGGTTGACGAAGGAGAAGGCGAGAT
CTCCATGGCTCCAACGACTACAGATGCTGTGAAGCCAAAGAAGAAAAAGAAGAAACCAAA
GGTGGAAGAAGAGATCATGGAATAGGTGTAATATGCATAGCGTTTAGGAAGCATTCAATG
GCGTATGGAGCGTGCAACAAATACCATAAAGGTATTCATGGGCTAAAAACTTTTTGAGTT
TTGATCAAAATGTAGTTCTGTAGGTTGTCCGTGTGAATGCATATGTACAAAGTATTCGGT
TGTTTCTATCTCAATTGGCTTGGAAGTATGCAAATACTCCTTGCTTTGATTATACTCTTG
CCAATTGAAATCACCCATTGATCCAGGTTCGCGCATCTAATCT
>eb99d4ed-cef9-4eec-b01c-084ad9b7433f (mRNA) 1732 residues [Bfab07:189730-191461 + strand] [genomic] name=Bfab07g00500.1
TCACAAGCTGTCCCTACTTTACTCGAGCTTCCAACCCCGGATTTTCATCTTGCACTCTTC
TTCTTCTTCTTCTTCCTCCACAAAAGCCACATCTAGAACACCCGAAATACTACAAGCATG
TCCTCTGCACTCCTACACCCACCTGCACATCTCCCGCCAGCACTGGCCTTACAAAACTCT
CAACAAGCTCCCTCTATATTGCGGAACACTCCCTCATCGATATCATCGTGGTCCTTAAGC
TCGCTTTGGACAGCTGCGGAATCACCAGAATTATGGACCACTTACGAAAATCTGTTAATG
TCATGCTTGCGGACTGGTGATGAGAAATCTGCGCAGCTATGCATCAAGCGACTCCAAGAA
AGGTTCGGGGTTGAAAATGAGCGGATTATGGCAATGAGAGGATTACTTTGTGAAGTTAAT
GCAGAGGACAATGCAGCACTACAAAAAGTACTGGACGGATACGAACAAAACTTGTCAGAC
AATCCAAATAACATGGTAAGCTTACTTGAACGTGTTTCCATACAAATATTTACTGAGCCG
TGCAGCCTATCTTGAAACGTCGAATTTCGGTTCTTAGGTCACTTGGAAAACCCTCAGAGG
CAATTGCCGCACTCAATGAGCTGTTGGATTTATCCCCCACGGATGCAGAATCCTGGGCAG
AGTTGGCGGATCTTTATGCTTCGCAGGGCATGTATCCACAGGCAATTTTCGCATTGGAAG
AGGTCCTACTCATCACACCTAATGCATGGAATGTAGGCTGCCTAGTATCTTTTTTGGAAG
CCGTAAATGTGCTAATAACTGAATTCAGATGCATGCCCGACTTGGAGAAATTCTATACAT
TGCCGCGGGTGTCAATGATTCGAATTCGGATCGGTACCTTGCAGACTCTATGCGAAGATT
CTGTAGAAGTATCGAATTATGTGATGACTATCTACGCGGATACTATGGCTTGAAACTGGT
AGGCTTAGCCCATATTTTGAAAAATCACTTCTAACACACCACAGGCTAGTAGTCAACTTC
TCCGCAAGCCCCCAACAAGTCGAAACAGCAAACCAGATAATAGTCTACCCTTTCCAGGCA
CAAACACAATCGAGAAGCTGAATGAGACTGCTACGTCTAAGTTATCGGAGATCGTCCGAC
GAAGTGCTGCTAGAGAACCCGGCTGGGAGGGTTATGACGAAGCTTCCCTCATCGCCGCTC
GTGAATTGTTGAATAGAGATTCGGGTTCTATTACTCGTTGATATTCATAGAAATTAATCA
GTTCTCAGAATGTGGAACATGCAAGGCACATCACCTTGATCCTGGAGACACAAGATCCAC
ATTTTGGAACAAGAATTCCCATCATCATTTTCAACGTCGGATATATGCACTCGCACAGTC
CAAAGTGCAAGGTTCGATATGGTTTTTCAACTCGAAAATTTCTTCCATCTATAAATTACG
GTTACGACTTGCATGAGAATGTTACTGTTCAAACCCGTCGTTTCATATGTCATGGGCTAG
AATTGGACAATCGAAAGGTAGGTTATACGGTAATAACCCCAAATAGCATCATTTCATGTA
TTAATACCTCAAATGTCAGAAATATGACTAAAATTACCCCAAATAGCATTTTTGATATTT
CAGTCTCGACTTTTTTTTATAATGTTGCTATTCTGGTCTTTCTTTTTTTAAAAAATTTTC
TAAATAGAATTTTCAGATTTTTTAAATTATTTAAAAGAATTAAGAAATTGAA
>b9111140-f9df-45d2-8877-dd8d4ce307ff (mRNA) 4972 residues [Bfab07:193718-198689 + strand] [genomic] name=Bfab07g00510.1
TCGAGCCCTCGCAGCAGAAAAGGATCCGGAAAAGCTACTCGTGGCTACAAACAGACAATA
CTTCTAGCCACTGCTGCCCACAGACCAAAGCCAAAAAGTTATAATCCACCACACCACCAT
CCTTCATCCACCCATCCACTCATCCACTCATCCACCCTTTCACTCAACCCACTTATTATT
ACATCCATTCAAGATCCACACACCACACTTTTGTTTCTTGATTTCCCTTTTCCCCTCCAA
ACCCTCCCTCGAACAATCAACCTTCACTTATCGATAAAATCCCTCCGCCACATTCTTTCA
ACACAACCAGACCGTTCGAATAGCAACACCGACAGTCGACAGTCGGCAGTCGACCATTTC
ACCAGTAGTGTTACTGACCTACTATATTAATATTCTAGAGTGTCACTTGAATCATCGCCG
CTTACATCTCCGATCAACACAACCTTGGATTTACATAAACTATCTTAGCATACCCGTCGA
TTGATCAACATCGAACCACTAGCTAGTTAGGTTCGCGACGGCCCGCACAACCACTACAAT
TTATTATTACCTCTTCACTCAAACTTCAAAAAGTTTGACACGACGCCGTCCAACCTTAAA
AATCAATTGAATTTGGTGCTTTGACGTTGAGTCGCTTCTTCGTCTGCGTCGTCTGCATAG
AATTCATTTAAACTTAACAGGTTTTTCTGCAATTCATTATCGGTAGTCCAATCCGGAATA
TTCTTCAAGAAGTTGTGAGGTGGAACATAGCCTGGGCGAAGACTTCCCCCCCCCCTTCAC
CAACCCATTTTCAAGGATATCTTCACTCCGACATTCTCTAATCGAGAGTCGTGGGTGGGA
GATAATTCCTTGCAAGAGACATCCCGATGCCGTAAGTACTTGAATTCACAACATAAGTGT
CACACTGATAGTTGCGACATGATTAGCGGTCTAGCTTCACGTATGCTAACTCTTTAATTC
CTCATAGTCTTCGTACAAGGGGTCAAACAACTCGAATAAGCATTTCACATACTCCTAATA
CCCAAAGTCCATATACTACTCCATCACACTCTACTTCAAATTCTAGATCCAATTCATTCT
CCGAGGGATCGTCGGGTCACATTCGCTCAGACGACAGTCAGGAATTTTCTGATAATTCCC
AAGACTCTTGGAACGGATTAGATTATTCAGACGACATCGAACCCTCTGAATCTGCTTCAC
GGCCACGCGCACAGGCAAGATACATAGACAGAGGGCAAATTAGTTCCCGAGAACATAGTG
CAGGTCGACCAGCTCCTAGTGAACGTGCGCACTCGAATTACGATCGTCCAGCACGCCGTC
ATACTCCGGCCGCTGAACGAAACCACCGCCCACCTATATCTAGAGTGCACCGGCACACAG
CACCGGGACCAGTATCAACCGTGGAGCAATTAGATGATTTTTCAGGCTATGGCCGAGGCT
ATCCTGCTCAACAAACCGCTCCGTATGGTGGTAGAGTAGCGCCTGCGCCTGGATATGCCT
CAAATGGATACCCCGCTAGTGCAAGTGCTCAATATGCACCCCCGTTTGGCAATCCCGCTG
TCGCTCCCCCTCCAGGCTCTGGCCCAGGAGCTTTAACACATTATGGTGGCGGATATCCTC
AACAACAATACAACCAAAGTTCAAATCCATTTGCACCACAAAGCCAGACTTCATTTGCGC
CACAACCATCTCCAAGCCCAGGCGGAGCTAGCTATTTCAACAGCCATAGTAGACACGATC
CAATGGCATCTAGACACGATCCAATGACGTCTAGACACGATCCAATGCCGTCTAGGCATG
ATCCAATGGCATCCAGACATGATCCAATGGCATCTAGACATGATCCAATGGCATCTAGAC
ATGATCCAATGACTGGGCACAGTGGACACAACACCCCTTCTGGATATCCTGGCCATGCTA
ATCAAGAGCTTATGCATTATGCACCTCAGCAAGGTTACCCCGGGAATCAGCCATATGGCG
GAGGTCAAGGCTATCCAGGGTACCCAGCATATATGCCACCTGCTATGTCTCCGGGAATGA
CTCCAGGTATGTCTCCAGGTATGTCTCCCGGTATGCAAACACTGCAGCATGGACATCATG
GACAGCAGCATGGACAGCAGCATGGGCAGCATGGGCAGCAAAATATGGCAATGGCTCCAG
CAGGGATGCAATACTTCCCTCCTCAATTTTCCCCGCCAGCTCCTGAGCCAGCTCCAGCTT
CCCCACCAGTGCCAGTAATTGATATTGAGATGGAGAAGAAAATGGTGTTGATGGAGGAGC
AAATGAAAAACGCTAAGATAGAGTCTGATAGGGCTAAAGAGCAAGCAGAGGCCGCCCAAA
AAGCATCTGAAGCTGCACAGAAAGCATTGGCCGACAAAGAGGCACGAGAACTCAAAGAGA
AATTAGAAGCCGAAGAAGCTGCTGCTGCTGCACAAAAGCTAGCAGATGAGAGGGCAGAAT
GGGCAAGGAAAGCCAATGAAGCCCAAGCTGCAATTGAGAAGAGAGCAGCCGAGAAACAAG
CTGAACTAGAAAAAAGGGCTGCAGATATGGAGGCCGATTTAAAAAAGAAGGCCGCTGAAG
CTGAAGCTGATTTGAAGAAACGAATGGAAGAAGCTCAAACGTTACTAGCGGCTAAACTTG
CACAGGAAGCAAAAGCAGAGAAAGAGGCAGCTGATGCCGCTGCACAAGCTGCTTTGAGGG
CTGAATGGGAGAAGAAGGCATCAGAAGCACAAGCAGATTTAATGAAGAAAGCTGCAACAA
TGGAAGCAGATCTCAAAAAGATGGCTGCCGATAATGAAGCTGATTTGAAAAAGAAAATGG
AAGAGGCACAATCAGCATTGGCGACCAAATTAGCGAAAGAAGCTAAGGATGCCGCGGACG
CTGCAGAGGCCGCTCAGGCCGCAGCTATTAAAGCTGAATGGGAGGCTAAAATCGAAGCTG
AGAAACAATTGGCATTGGCGAAGGGCGCCGCGGATGCATTGAAAGCCAGGGAAGATGAAG
CAAAAGCTAGGGCAGCCGAAGAGGAAGAAGCAAAGAAAAAAGCAGATGAGTTAGCCGCCG
CCATCGCCGCCGCGACCGCGGCTGCGACTGCAGCTGCAAATGCTGCTAATCCACCGCCAC
CACCTGCTCCACCAGTGGATGAGAAAAAGAAGCCTATCAAGTTCAAGGATGCCGTAGGCA
GAAAGTTCAGCTTTCCATTCCAGTTGTGTGCAACATGGGCGGTCAGTTATTTTTTTCATT
GTTCTTTCCCTTTGAGAATACAATTACTAATTAAGGATTCTGTACAGGGCATGGAAGAGT
TGATCAAACAAGCTTTCCTTCACGTCGATATTATTGGTCCCCACGTTCAAGAAGGTCACT
ATGATTTGATCGGACCCAATGGTGAGATTATTCTACCCCAAATATGGGAAACAGTGATCG
AACCCGATTGGGCGATCACTATGCATATGTGGCCAATCCCAGAACCGCCAAGGCCAGCAC
CTCCAACTGGACCTCCTGGACCACCCCCAATGAATCCAAATGGTAGGCCCCGAAGTTCTC
ATGGATATTCTCATCATCATTTTCCTAACCGTCTTCCAACAGCACCTCCCAATGGCATCC
GACCTCCTGGGCCTCCCCCTGGTGTAGCTATGCCACCTGGACCTGGACCTAGACCACCGC
CACCGCCACCCGGGCCTGGGTCTGGAGGCCCTCCTCCTCCTCCCTTTCCTCCCTTTATGT
CTCACCCAAGCGGCCCACCAGGTCCAAGAATCGTAACGGTCAAACCAAAAAAGAAGGTAG
AATCCGGAGTGCTGGGATGGATGGCAGGCAAGAGACCTGCGCCTTCATCTAAAAGTATAC
AATCTACCTTACATATCTTTCGAACACCTCACTTACTGAACAAATAGGTCGATCCAAAAA
ATAAATATCACGAAATTTCGTGTAGCGTGAAACATCATCTAAATCTTCATTGTTCCTATG
AACGCTTGGAGTGCCATAATCATAGCGACGACTTCCTGATTAAAAAAGCTTCTGGTCTCA
AGATTCCTTGCCTAGAACTGGATCTAGGTCACATAGATTCCATATGTCAACTTTAGCTGG
GAGGCAGTATCTCAAAAGCTAGAGCTGTTTTCTTTTGTGAGTTTTTGTGTGGGCGACGGG
TTGCGTATTCTCGAATCCTTAATTTTTGTTCAGAGGCATAGATTTTTCTACCTCGGAGAG
GCGGGCCGTTTCGTCTACACAAAAGATGAAGCTAATATGTTCACGTTTCTTCAGTATTTT
CAATGTTTTTTTTTTTCATCTAGCTAATGTCTGCCAGCGTGTTTTTTGTTTTGTTTTGTT
TTTTTGTTTTTTTTAATATTTCGGGGGTTTCTCTTTTGATACCATCTTGGGATATACAAA
TTTCCTATTGCTCATTTAACTCCTGTTTTGCTTTTGAATGAAGGACAAATTTTGGGCGGG
AAATGGAGATATGACACCAAATGATTACGAGCAGATGAGATAAGAACTTGAACGAGAGAT
GAAAGGGATGGATAGTATTGGATAGGCAGGGAAATGGATGGCGCATCATTTCTTGTTTTA
TATTTTTATGGCATGAAATGGTGTTGAGATTTTTTGATGGGGCATTACTTACATCTTCTT
ATTTTTGGCTGTGGTTCCTAGTTTGTCTATCATTGTTATAGAATGTTTATAGGACTACGA
CTATTCTGTATTTGTTTCTAGCCTGTCTCCTTTGTTGCAGATGCGAGGTACAGCAATGCA
TGGGGGAGAAGCTTAAGAGGTCAATTTGAGTGGAAGATTAAATAGGGAGGGGATGAGAGG
AACGCAAGCAATTGGCAATGGAAGATATTTGTATTCTTTTTGGGGGAGAGAGAAGGGGAA
GATCAAGATGCTGGAAGTGAAGTGCAGTGAAACGGAGTACAGTAATAGCTTTTACACAAA
CAAAATATCTTTACATCTTTAAAAACACGAAATTGTCCAACCTCTCTGCAGC
>633151e7-b921-42b7-bbaf-a9a5a36c6a72 (mRNA) 8105 residues [Bfab07:204312-212416 + strand] [genomic] name=Bfab07g00530.1
TGCGCAGTCGATACCCAATGCCACTTGGCAATTACAATTAATACAATCATAAACCCCTTG
ACCTTTGCATAATTTGGGGTTATTCCCATACTTTCTTACATCAACAAGTCAACTCCATTA
AATCTGGATTTTGTATCGCGAAGTTCCTCGAGTACATACATACTACTGCATCTTCTCCAC
AATATCAACATTCCACATAACCACATTCCGGGGATTTATCCTCCGCAATGCCTTCTTCAG
AGAGAGAATCTTCTCGCGATGGCGATAGACTTGCTCTTGTACATAGAAATTCCGCGCATT
CCATATCCTCATCAATAGATTCTGGGCGAGCAATTGTTCCAATGTAAGCTTTTATTTATC
TCATCTATATGTCAACACGATTCTGACGGTGAATTTATAGGTGGGATAGTTCTGATCCAG
AACGCGCACCTCCTCCACTTCCCATGAACCCCTCGTCCCCGAGTGTCTCATCGCGAGGAA
CTTCGGCTGCTATCAAGTCTGCACATGCGGCGCTTACTGAAAGAGCTCGCGACAATACTT
ATTTTATCAATATACCACCCCCAAAACGCCTCACCGAACCATCCCCAGAACGTTTACTGA
TTAAGGGTGCTGCTCCCGGTCATAAACGAATGCAATCTTTGCAAAATGGTAGTGTCAGAG
ATTTGAGTAGTTTTATTGAAAGTGGAACTTTCGGTCCATTGAAACCTCCAGAGAAAATAT
CAGCAAGACCTGCGACACCACACGCCAGCAAGGATTTCTCATTCGACCCATCGCCAGAGA
AGTTTTCCGACAAGATGTCAGATAAAGATTCGGCTCGAGCCACAACACCTACCAAAAGAG
CCGAGTCGCCTCAGGAAAGACGCGACTCTATACATGTACGACCTTCACTGCGCCGGCCAC
CCCATGGTATGTTTAGCGAAAACACGCCCCCTCAGTCAGCCACGATGCAGGCTCTTCACA
ACATGACGAGTAAGGAGACAGATCCACCTCTTGCCAATGTCACCAATGGCTCTACTGCCT
TAGTGCGACAACCTCAAACGTTCGACGCCATCTCAAATCAAATTCTCAGTCTCACCAGTA
TATGCACCAGCCTGCAGAGGGAAATGGTGCAATTGAGTAGAAGAAGTAAGGATAACGCTA
CAGATCTAGTCAGTCTCAAGGAAGCGACAAATGCCAGGGATGAGGATATACGTAAGAGTC
TCCGAGAACTGGTTACTGGCTTGTCTGATGCTGGCTCCGAGCGTACACTATATGGAGGCA
ATAATCTTTACGCGGACAACAAGGGACATGCTTCACCATCCTCATCACGCAATTCAAAAG
GATTCTCGCTTCCTCGAATCCCTAGCCCAAACAGCTTCGCTGCTTCATTGGATCGAGAAA
CCTTATTATCCACCCCGCTTACGAGAGATCATGGTCGAGAACACATTAGCGACGCTGCTG
CGCATGCTGCTAGTGTGGCTCTGCTCGAAAAGGTACTGCGAGAGATGGGAACTAAAGAAG
GACAAGAGTTGTTGATATCTCGACTTACGGAAATCGCTGAGCAACTTGGTCGGGAAGGAA
TGTCGACAGCCAAAAAACTAGAGGACCTGGTAGAATTTATCAAGAAAAATACTGAAATTT
CTCAATCTCTAATTGCCCATCACAACAACAATCGCGAACAAGAGACCAGGGGACGTAAAT
ATAGCTTTGAAGAGGACTCGCCAAGACTAGAACTAGATTTTGATAGGCCGGCCTCTGTCG
CACAGAAATTAGAGGCTCTTGTCGCCACTGGAGCAAATAGAGACCGACACAAATCGCAAG
GGCGCAGTCGATCAGGTGAAGTATTAGGTGATGATGTCATCCAAGTTATACGAAGTGTCA
AAGATAGCGTCGCACAAGGAGGTGGCCTTACCGCAGAAGTCAAGGCACTAGTTCGAGAAC
TTCGTGGTGAGGTTTTGGGTATGGGACGAGAGATCGGCAGAAAATTAGATCAAGCCAGCA
AGGATGGAGCTTCCAATGGTGCCGATGTCACTATTGTCGTTCAAAATGGGTTGGAGGAGT
TGAAAGAGCATATGAATCAACTTATCCGTGAAAGTCGACGTCAAAACTCCGCTTCCGCTG
CCACACAAAAGATTGACTACAAAGAAGTCTATAACGTGGTACGCTCAGCGGTAACTGAAA
AGTCCGAATCAAGAGAAGACATTATTGATGCGGTTCGAGAAGCTTGGGAAAACTATAAAC
CGGATATCGAGTTGCAGCATTTTGGTCTCGAGAGAGAGGAACTATTGGCATGCTTGAAGG
AGGGCATTCAAGAATTTGCGCCTCAGAACGAACCGGGAGCAACACGAGAGGAAGTCTTTG
CCGCAGTCATTGAAGGATTGAAGCATTTCACTCCACCGCCAGTGGATAACGAATCATTAT
CTCGAGACGAAATTCTCGATGCTGTTCGTGAGTGCCTTGAGGAGTTTGAGTTTCCAGCTG
CACCAATGCCAGAGCCTCGCGAACCTGAAATCACTAGAGACGATATGCTTGATGCTGTGG
CGGAAGGTCTTAGAACTTTCGACTTTTCTGCAAACCCCACGGCACTCAGTGCAGAGGTTC
TTCAAGGGTTCACTCAAACTGAAATGATTCAAGCCGTTAAAGAGGGTCTCAAAGAATTTG
ATTTTGCTGCTATCAACCGTGGTCATGATGACATCAAAAGAGACGATATGGTGGTCGCTA
TTCGAGAAGGGCTCCAAACATTTGGACTTGCTAACCAGAATCGCGAAATGGATGGAGGTG
TTACTCGAGATGACGTGGTAGGCGCAGTTACCGAAAGCCTACATACGTTTGACTTCTCCG
GCAGTATTCATTCACCACATCATGGCGAAGAATCCATCACTCGTAACGACATGTTTGAAG
CTGTGAGAGCAGGTCTTGAAAGCTTCGAATTTCCCACTTTGAACAGGGAAGTCGGAGATA
GTATTAGTAGGGAAGACGTTTTCGATGCCGTGAAAGAGAGTCTCCACAATTTCAACTTTG
GCGCATTAATACCAGCCTCCGACCCCGAGGAAAAAGAAACAGGAATTTCTCGGGAGGATG
TTTTCGAGGCTGTCAAAGATGGCCTGCAAACCTTTGATTCCGCTCTCACACGCGAGGTTG
GTGGAAACACCGGCATTAATCGCGGCGATATCCTTGACGCTGTGAAAGAGGGACTTCATA
CTTTCGGTTCTGCTCTTACTAGGGAAATCGGTGGAAGCGGCAGTCTTACACGTAATGATG
TAATGGATGCTGTCAAAGATGTTTTGACCACTTTTGATTCAGCCCTTATTCGAGGAAGAG
CCGAAAGCGGAGCAACTCGCGAAGAAATCGTCGATGCCATGCAGGAAGTTATGACAAAAT
TCCATGGCTCATCCATAGCTTCAGGTCCAAGTCAAGGAATTACTCGCGATGATGTCGTCG
ATGCTTTACAGGAGGTTCTGGAAGGGTTCAACTCGGCTCTTACCAAAAATGTTGGAGGTT
CTGCAACTCGTGCTGAAATTTTCGAGGCTATCAAAGTCGGTCTCGAATCACATGAATCTA
GTGGTAATATAACTCGGAATGACGTCCATGAAGTTATCAAAGAGAATCTTCAGAATTACC
ATATTGAAAGTGCCCTTACCCGCGACGAAGTTGTGGAGGCCGTCCAAGAAGTATTGACGG
CGTTCGATTCTGCATTAACCAAAGATGCTTCTTCAACAGTTACACGAGATGATGTTCTTG
GGGCCGTGAAAGAAGGACTTCAAGCGCAGACATCTAGTATCACGCGCGATGAAGTTCTTC
AAGCCATAAAGGACGGCCTTCAATCGAAAGAAATTGCATCAACTCGGGAGGATGTCGATT
CAATCACTCGAGATGATGTATTCGATGCTGTGAAGAGTGGATTTGAGATCCATGAAATTG
GAGGAAGTGTCACCCGGGATGACATTCTCGAAGCAGTCAAAAGTGCTAGTTTCACACGTG
AAGACATACTTGATGCCGTGAAAGATGGACTCCAAACCTTTGATTCGGCATTGACAAGAG
GTGTCACACCTACATGCACTAAAGCTGATGTTTTCGAGGCTGTACGAGTTGGTTTACAAT
CTCAAAGATTCCCACCAACAGTCACACGTGAAGATGTATTCGAAGCCGTCTCAGATGGCC
TTCAAACATTCAACTCCGCCATCGTTAGCGTTAGAGAGGCAAATGCTAGCAAAGGCGACG
TCTTCGACGCTGTCAAGGAAGGTTTCGAAACATACAACAACGCTCTTACTCTTGATATTC
CAGTGGGCGTTAGTCGTGAGGATGTTCTAGATGCAGTGAAGGAGGGACTACAAACGTTTA
ACTCAGCGCTCACTACCGAAAATGATGTCAAGGTTGACCGAGAGGATATTCTTGAAGCAG
TCAAAGAGGGCCTCGAAAACTTTGATTTTGCTGCTGCTAAGGCGTCTACCGATCTAAGTC
GAGAAGTTGTGGAAAATATCACCCGTGCCGATGTTATTGAAGCCGTGAAAGCAGGACTAG
AAAGCTCACCACAATCTGTTGACAACTTCACTGCTCAAGTCTCGGAACGCATACATGAAA
TTATGGACTCTGTACGAATCGAATTCAAGGCAGTTTCAGACGAAGCTAAACAACAGGTTG
CTGCAAATGGACGGGATTCCGAGCAACTACTAGATGCAACTAAAGACGGATTTGAGAAGC
TCCGATCTGACATTGAAGCTTACGTTGATCGAGCCTCAGATGTCACAGGTAAAGATGAGA
TTCTCGAGAACATGCAGGATAACTTCGCTACGCTTCGTTCCGAAGTGGAAGAACTTATCT
CTAAAAGCTCAACTACTGGTCTTGAAAAAGTCCACAGTGAACTTGAGCATCTTCGAGGTT
CAATAGCATCAGCTTTGGTTCCATCAGGAGCAAGCAATGATAAAGATGAGATTCTTGATG
CCTTGAAGGAAGGATTCGATGGTCTCAAACCTGGTATGGAAGTCTCGCGGTCACGAGATA
TTGACGAAGAAAACATGCCAGGAACCAGAGAAATCATCGACGCTCTGCAAGACGGGTTCT
CTGTTCTCAAAGCTGAGGTTGAAAAGGCTGCCAACAAGCCTATCGATATGACTGTTAATC
ATGAAATTCTCGACACCCTCAAGAAAGGTCTAGAGAATGTCAAAGTTGATTTTGAAATTC
TCAAAGAGAATCAAAAGAAAGAGCAAGCACTGGTAGAAGTCTCTGATCGCGCATTGGTTC
CAGCTAAGGACAGCCTCTCTCATAATGATATTGGGAATCTAGAGATGCTTATTACCCAGC
TTGGCATCAAAGTAGCAGCACTGGAGTCGAAGGAACAGCTTCCACCACAACTTGCTCCTG
GTTCTGTGACCAAAGAAGATTTGGCTAAAGTCGAGGAGCTGCTTCGAAGTGTTCAAGATA
AAGTGGAGGGGGTTGTTACGCGCGAGGTTATCCCTGATGAAGATAGAGTCAAGAAGGAAG
ACCTTAATGCCATTGAGATTCTGCTTCACAATGCAAAAGCTAAGCTTGATGAGATCGACC
CTGAACAATCTGCTAAGAAGGAGGACATTGAGACTATGGGTGTCTTTGTTCTTGAAATCC
GAGATAGTGTCAATGCAATGATTGAACATCTTGAGGAAGTCTTGAAGAAAGATGATATCA
CTTCTATCGAAACTGCAGTACATGATGTCATGAATGCCCTCGCAGAAATAAAGGAGCAAG
TCAGTAACGAATTCAAGAGTCTCGACAAGGTTACAAAGACCGACGTTGAAGCTGTCGAAT
CTGTATGTCTTGACATCAAATCTGCTATCGAGCAAACCGTTGTTCCAGAATTTGCAGTTT
TAGCTACGAAAGACGAAGTTACCACACTAGGTACCTTGGTGAAGGAAACCGCCGGTCGAA
TTGAATTACATGCAACGACGAATGCCAAAGCTTTCGAGGACCGACAGGCGGAAACTGTTG
GTGTTAGTGAACGTGTTACAGAGGTCAAATCTTTCCTCATGGAATTCAGGGATGCAGTCA
AGGAGAAGCTCGACGAAGGTACAGCTAATGTCGAGACAGTTCGCACATTCCTTGAAGGTC
TTGGAGAAACTATCAACAAAAATGGCACTATGTCCGAAGATCTACAAGCAATGTTTCATG
CTATGACAGAAGAGTTTGAAAAGACTAATGCTGGTATGGTTGGATCTAAGCTCGATACTG
ATGAAAAGTTTCAACAAACATGGGACAAGCTCGATTCACATTTTGATGAAAAGTTTACTG
AAATCATTACCAAATATGATGAGCTCCAGAACTTCTTGGAAGAAAGAGCCACAGCCGGTG
TAGAAAAAACAACAGAAGTTGAGGCTAACATCATAAGCACGAAGCAAGTGGCTGAAGATG
TCAAGGGCCTACTTGATACATTAATAAGTGCTGTGACAGACTCCGCCGAAAAGATGGATG
AAGGCTCAAAGACCGTTTTCAACCGTGTTGATGAAACATTTATCAGAGTAGAGGAAACTC
ACGCCGATGCTAAGGTCGAGCACCAGCTCACACGCGAACAAGTATTGAAGACTTTGGGCG
TTGTGGAAGGAGTTCATGGAACTGTAACGGAGTACAATCCCCAAATTCTTGACATGATCA
AAGATGTTCTTAAAATGGTTGGTCAGCATTACGAACATTCAAAGAATTCGGTAGAGACAA
TTCAGGAGAAGATCGCCGAAATTCCTCCTCCACCAGAAATCCCTCCTCCTGTTGAATACG
ATGATACACCTGTTCACGAGAAGCTTGATAAGCTTGTGGACCATGTGCAAGAAGCCGGAA
AGTCCGTGGCACAATTGGAAATGCTTGACAAGATCCATCGACAAATGATGTCCACTGCTG
CAGAAGTTTCTCAATTTGTCACAACTCAGACCCAAAAAATTGCAGATGACCATGAAAGTA
AGGAACAAGCTGCCGCAGAAGCTGCCATTGCCTTGGAGAGACGTCTTGTTCAGAAAGAAC
AAGTCGAAGCATCGATTGCTTCACTTAAAGGCGAAGAAAGAGCTATGAAGGAATATATTA
CCAAGCTTAAGACCGACAAAGAAGATTTGCTTCATCAAAAAATGAGACTCTCTTCTGATG
TTTCTAGCTTGGAAACAGCCTTAAGAATCCGCCGTGAAGAATTACAAGAAATGGAAGAAA
GAGCTGAAGGACTTGAGAGACGCATTCTTGAGGGAGTCATTGATCATTCCCGAGCCCTTT
TGTTAGCAAATGGCAATAGAAAGAAAGCACGAGATCCTATGAGTCGTAAACGGAACCCCA
CTCAACGCAACTCAACGGCTCATTCTATCGCCTCCAGCGTCGCTTCCAAAGCTCCATCGA
TTACACAGGGCGCTGTTAATATGGCAATGAAAAACCGCTCTCCTACCAAAGGACCTCAAG
CCAATCAGGCCCAAAGACGCATTCTATCCCTGAGTCAAATCAACAATAATCTTTCAAGTG
GCAACTTCAAACGTAGTCACAGTGTCAAACAGCCCAGTGCTGCTGCTACTCCACGTAAAA
CTAGCTGGGGAGAAGACTCAAACAAATCCCGCAATTACGGAGAACTTAACAAGGAGAATC
TGGCTTTGAAAGAATATGAAGATGAAGATGAAGAAAACAAAGAACCAGGCCATCTTTCTG
ATCATGAAGGCGGAAATCAAAGCGATTCAAACACAATGAGAAGAAGTAGTCATGGTACTA
CTGTTATTACGGGAAATGAAGGAACAGAGTATTCGGAGAGTATTGATGGTGGTGGAAGAG
ATCGAGATGAGGATAGAGATAGGGATGAGGGGTCAGAATCGGATTATGAAACGGAAACGG
ACTTGGGAACCAATAGTCATTTGGGCACCGAAAGTGAATTGTCGAGTAGTAGTTTGGGAA
AGGGAAAAGACTATAATGCGGTGGTTTTGTATGAAGAGGAAGTTGTTTAGTCCATTGATG
GTTGGAGATGGGGATGAGGGAACTGATGTGAGCAGTGTTGGATTCTATGGAGGGGCTTTT
CGTAAGCTACAAATACACGCGGTAATGGTCTAATTCTTGTATTTTTTTTGACCCTCTTAC
TCGCTTTGGGAAACGGAGGAAGGGGTGGCTTTTTTTTTGCTAGGAAGCAAGGGATCATGA
CAGGA
>69514aa8-49fc-4265-a41b-83ecc8f42461 (mRNA) 1901 residues [Bfab07:212644-214544 - strand] [genomic] name=Bfab07g00540.1
TGATATCCTTTTTTGAATTCAAAGTCTCATCTAGACGTTTTTTTGGTGTTGGCTGCAAAT
TTTTTGGCGAAGGGGTCGGAAAATAGTTTTACCGAGTGTACCCCGCATTTTAGATTCATC
CAATAATAATCAGCTCAGCTCACATTTCTTCGTTTCAACAGCTAAGGTTAATCTTATCTT
ATTGTTAGCTCTAAGGTTAAGCTTCCAAAAAAATAATATCATCCCACCATCCTTCCCCTC
AATATCCAAAATGTCAACGATAAAACGTTTTACATGTTTACGATGTCAATTCCAGTCCCT
CTCACGTCCATCTCCTCGTCGTCCATACCATGTCTCTCCACGTTTACGTTCCGAAATACC
CAAGCCCTCCATAGCACCCAAACAATCTATCGATATAAAACATATACGAACTAATCCCGA
ATTATACGAAACAAGTTGTCTAGAAAGAAATTACAAATTGCAGTCAACATACCCAGCTAA
AATCATAAATCTATTCGAACAATGGCACGATTATCAGCGCGATGCAAGATCATTACGGGA
AAGAAATAATAAATTAAAACTTCAACTTGCAAATCCAAAAGCAATACGAGATGACGGTTC
AGAAGAAATGCAAAAGTTACGCGCCCTTTCCAAAGAGGAGATCATCGCAGAAGCTAGAAG
TCTGAAGGATAAAATCTCTGAAATAGAATCTTCAGAATCAATGCTCATGACAGAAATCAA
CACACTCGCATCCGCAATTCCAAACCTTACATCCGAGTCCACTCCCCGCGGCTCAGAACC
AAAAGTAATAGGAACCATCAACGAACATCCCGAACCCAAAGCCGCCTCCTCAGATCGAGT
ATGGCGGTCTCACGTCCACATAGGTAGCGAATTAAACCTCCTTGATTTTTCCTCTGCAGC
CAATACTTCCGGTTGGGGATGGTATTATCTACTCAACGGTGCCGCACTCCTCGAACAAGC
CCTAATCCAGTATTCCCTCTCTCTCGCTCTCTCAAAAGGCTGGTCCATCGTTTCTCCCCC
CTCAATGGTCTATTCCCACATCGCATCAGCATGCGGTTTCCAACCCCGCGATCAATCAGA
CGAACAACAAATTTACTCCATCACCCAATCTCCTTCCGATGCCGAAAGCGCAAAACCAAC
ATATTCCCTCGCCGGAACCGCCGAAATTCCTCTCGCGGGAATGAAAGCAAACACCACTCT
CCACGAATCCCTCCTCCCTTTGAAAACAATCGCCACATCCCGCTGTTACCGCGCCGAAGC
TGGCGCTCGTGGCATCGACACCAAGGGACTCTATCGAGTGCACGAATTTACAAAAGTCGA
AATGTTTGCCTGGACCTCGCCTTCCCTCCCAGAAACCACAGAAATCTTCAACGAAATGCT
TTCCCTGCAAACCGCCATCCTCACCTCCCTCGATCTCCACTGTCGAATCCTCGAAATGCC
CTCTACCGATCTCGGCGCCTCAGCTATGCGCAAAATAGATATCGAAGCCTTCTTTCCCTC
GCGCAGAGAAAGAGATAATGGATGGGGCGAAGTAACATCATTAAGTATCTGCGGGGATTA
TCAAAGTAGGAGATTGGCGACGAGAGTGGATATTGATAAGAATGGAGGGAAAATTGCATT
TCCGTGGACTGTTAATGGAACAGCGCTTGCGGTGCCTAGGATTGTGGCTGCCATTTTAGA
AAATGGATGGGACGAGGAGAGGAAAGAGGTTAGGGTGCCCGAAGTTTTGTGGCCGTGGAT
GGCGGGGAGGAAAGTTTTGAAGAGGGAGTAACTTCAGAAGCGTAGTATGGGTGGTTTTAT
GTCGATGCGAGGTAGTTGTGTTCGTACTTAAGATACTAATGGGGACAGATTCATATCTCT
ACTCACAATGCATGCAATGAATGATACCATAGAAGAAGATA
>0259fd24-9371-4237-b7fa-a69c552d568e (mRNA) 2216 residues [Bfab07:215424-217639 + strand] [genomic] name=Bfab07g00550.1
TCCTTTCTTTTCTTTCACTTGATTGATAGACTTCTATGATCCTACTTTTTATAATCGATT
TAACCTATTCTATTCCGAATATCTATGATACAGGGGGATCACGGTTAAACGATACGCTGA
CTCCGAACAAGGCGCTCTCAAATCGCACTGTTACAAACACAAACTATATAGTTATTTTAA
CTGCTTGGTTCACATATGTAACAAATTTAAATGATTTCATCAAATCAATCAATCACAGAA
TCTACTGACGAGCCTGTTGCAAGTAAGTTGAAGGATAGTTTTCATTCCTTCACTTTTTGG
CAAACTCTCGCTGTGTGATTGCTGACTCTCCTCAGATTCAAAATTCCTGTTCATCGCGAT
CAACAATCCAGATGATTTGAGAGATCATGACACAAAGCGCCGAGCCCGGTCTCATGCTGT
GAAGCAAGCGCTCGAGAACAACCGAAAGCTTCAAAAAGAATCAGGTGACAATTTCAGAGT
TTCGTCGTCAAAAGATTACTCCAGAAGATTGGCGAGCAATAGAATACGTAGCCAACCCCG
GGTCACAATACCATTGTCCCCATCCGTCAGCACGCTTGATCCTTTCCAGACGCTGGCTGT
GGATTCATCGAGACTGCATGCACTGTTTAGCAACTGTAAGCCATTCATAGCCACTGAAAA
ACTACCTTGAATAGATAGCTTACATAAACCGATTCAGACAAAGCCAGACAGGCTGCCGAG
CCTGTTTTCAGTGTTAAGAATGAGCTTGTATATCATAGCTTTCACACAGTTTTCAACGCA
GGGCTAGATGACCCTGCTCTTTTGAATGCTGTTATGCTTACATTCGCATTTGCGGCGACG
GAGGGGGGCATCAATCAAGAATGCCTTAGGTACCAGAGTAAAGCAATAAGTTGCATTCGT
AAAAGAATGAGTTCTATAGACAGGGCTAATATGACAACAACCATTGGGGCCATATTGCTG
CTTACTGGGGTGGAGGTCTGCTAGCCTTTCCTCTTAGGTTTCCTAAAGTTCTTAAGCTTG
CGGCTGCGGTAGACTGATAATTTGGTGTTCTAGGCTCGCCTTGGGATGCAGTTTCAAGTT
CAAATTCATATGAGAGCAATAAAACAGGTGCTTGATATGTGTCAAACGGAGGGGATATAT
CTCACTAGCGGAATCAAGCGGGCTATATTTTGGTAAGCTACAAAGCAGCAGTTCAGTGAT
TCACTCTTACATTAGCATGCAGGCAAGACTTGAATTCATCTTTTATGACAGGCTCGACGC
GCATAGTTGATCATACGACTTTTAATGAGCTTCAGTGGAAAAGAGATTCGTATTCCCCAA
GTCTTTTCCGGCTTCCGCCAGGATTCCAGGTCCGACCCCAAGTACTAACCAAAGAGTTTG
TTGAAATACTGGAAGATATACATGCATTGTCATGTATTCGTGTGTTTTCCGGCCCCTCCA
ACTGTAAACCGCTAGCGATGGCAAATATTAACAACCACCAAGCATCTATTCAGTCACGGC
TGGTGGGATTATTGGGCCATTCTCCCATTTTAGAGTGTTGTAAGCTTGCTGCATATCTTT
GTTCCAGTATGCTATGCTGCCAGGTTTGGTGTGCCTTAGTAATTCCGGTACGTCGCCCAT
ACGGACTGCTTTTTTCCCCAAATCACTTCTCTTTCTCTCTTGGCGAATTATTTGGTTAAA
ATGTATTCGAATATGTGCCAAAAGTTTTTTTTAATCTGTCTTACGACGTGCTGAATTTTG
CATTCTACAGACCCACGTTTCCTCAAGATTACTTCGAGAACTACAACAAGCGAACGACGA
CCCTGTATGGGAAGATCACCCTGAGTTGTTACTTTGGCTCCTGTATATCGGCGGGGCTTT
CACCACCACGGAAACCGTACGCTCAGATTACGTTGTTCTCCTGCGCTTGAACACTTCTTC
CAGACTTCGAGGCTTGTATAAATCGTGGCAGGAACTGCTTAAAATTTTGAAGCAATTCAT
TTGGTCGGACGTCGCATTCACGTCGGATGTTAAGGCGCTCTGGGAAGAAGTCACAAATTA
AACTGGTTCGAATTTGAATATCAAATTCCCAACATACTAGCCAATACTGGCTACCATTTC
AGTAGAAATGAAACGTTCTGAATACCTAGATAACCTCCTAGTCTCTAGCATCATATCTTT
ATACTAGCTTTTCATATATGATGTTCGTAATAATTCATGGTTTCCTCTCAACAACT
>a04d1ddb-3c55-43d0-bdb7-209b22ff8b65 (mRNA) 1783 residues [Bfab07:217810-219592 + strand] [genomic] name=Bfab07g00560.1
GTATATCTACTTCTTAGATATTGAATTAATCTATAGAGCACTTGGATTAATAATTCTTCG
GACTGATTGGTAATGCCTCCAAATTTCATATTATCTTGACTACAGCTTTCTTCATCAAAC
CACAAGGTGTAAAAGTATATAAACCTCCTCCAAGTGGTAGATATGACCGTTTTTTGCATA
CTTAAATTCCAGATCGATAAAACAAGAGGTGAAAGATCCCAATAATTTCAAAAGAACTTC
TTGAAATCTTCGATCATGGCTCAATCGCGCCTTTTCCAGCCTTTGACAATTGGCAATATG
GAAGTGAAGCATCGCATCGGGATGCCTTCACTCACTCGCTTCCGCGCTACCGACGATCGT
GTGCCAACCACTATGATGAAGGAATACTACAGCCAACGCGCCTCTGTTCCTGGTACCTTG
ATGATTGCAGAGGGTATCTTTGTGTCGCCATCAGCCGCCGGCGGATATCCCAACGCGCCA
GGGATATGGAGCAAAGACCAAATTGCTGCATGGAAAGAGATCACAGATGAAGTTCATGCG
AAGGGTTGCTTTATCTTCTGTCAGTTATTCGCAATGGGCCGTACTGCCAATGTAGAGGTG
GCGGAGAGTGAGGGAATCAGCATCGTGGCGCCAAGCGCTATTCCGATCGATGAAAACTTC
CCAACACCGCGGGCTATGACTATCCAAGAGATCGAACAATTTGTTGGAGATTTTGGGACC
GCCTCAGAAAATGCTATCAGCGCGGGTTTTGACGGTGTCGAGTGCCATGGCGCGAACGGC
TACCTCATCGATCAATTCATTCAGGATACAAGTAATCAGCGCAACGATGCGTATGGCGGG
AGTGTGGAAAATAGGTCTCGCTTTATCAACGAAATCATGAAAGCCATGGTCAACGCTGTT
GGCCCGGAACGTGTTGGACTCCGTCTTAGCCCTTGGAGTCCGTTCCAGGGTATGAGAATG
ACTGATCCCATTCCACAATTTATGGACATCATCTGCAAAGCCAGAAAATTAAACCTCGCA
TACCTACACCTAGTTGAGTCGCGAATCTCTGGTGCGGATGACTACAGCGGCAGCAACGAG
CGGCTAGATTTTGCATATCAACTTTGGAACGGACCTATCCTTGTCGCGGGAGGGTACAAA
CCAGCGGATGCACAAAGGCTTGTTGACGAAAAACGTCCAGACAAGGATATCGTGGTCATG
TTCGGAAGGTATTTCATTTCAAACCCAGATTTGGTATATAGGGTCAAGAAGGGCGTGGCA
TTGAATGCGTACGACCGGAAGACGTTCTATATTAAAAATTCGTCGATGGGGTACGTGGAT
TATCCGCCAAGCATAGAGTATCTGAAAGAGCACGAGAGTGTCTATTAGTTCGAGTTGATA
AGGTATCGTAGACTAGTGGAGTTTGACCATAGTTACTAGGTGCTAAATTATGGCTCGCTT
ATAAATCTTTGTTCCTGTAACTATATAACTCTTATTCTATTGAAGGCTTCTCCTCTAATG
TTTGAATTTTACCTCCTTTGATATTTCTAAAGCGTATTCATATCAAAAAGACTGGGCAAT
CGCTAAGTGATGGTGCGAGGAAAAAGAGAATTGAAGTTCTGGTGACGAAACTATTCGCTA
AGCACCGGTACGTGGAAATGTGTTAAGTGACAGAAAGACCATACTCTTGCTAACTGTACT
GGTTAGTTTATCATTTTTACTACTGCTATCGGGCTGCAAGTATTTATAGTGATCCAACTA
CGTCTGAAAATTGTTGCACTTTATGTAATCTTCATCCATCGCT
>dff58684-85ef-465d-a159-90f77e4d2d7c (mRNA) 3389 residues [Bfab07:223866-227254 - strand] [genomic] name=Bfab07g00590.1
ACTTATTTGAGCTCCAAGCAATCACATCGTACATGTCGCGAGGCTGCGACATTCATAATA
ATGTTATTTCAACATTCGACGAAATTACAGAAAAATCGCGTGCCGAACTCAACTTAACCT
GTTTCTGTTTACCCAGGTATCTCCAGTATATCAAAACAGTATGGCTTCTAAAAAATACGC
GCTTCTTCCTATGGAGGAAGAGGAAATAGGTCCAGCAAAAGTGGTAGCAAAGAGGAAGGA
GAAAAAGTCACACCGTGAAAGCTCCTCGCGGCGCGACAAACACCGAGAAAGGTCACCTCG
TCGAGAAAGGTCTCCACGTAGAGATACAGAGCAGCGCTCAAAAACTATCCGGAATAAGGC
AAATGATGATTATGAGGAACGATGGGGCGACGAAGAATACATTTCCGAGGACGAACCCGA
ATTCCAGGAGCCTGCCTCAAAACGGGTCAAAACAGTACATTCAGATGACAATATCTCGGA
TTCAGAAAAAGAACGAAGGAAAGATCAAGCAGAGAAGGATGCTTTTGCGCAGAGGCTGCT
GTCGAAGAATTCCGACAAATCAAAGACAATACTCGAAGATAGATCCGATCCTATTATGGC
ACAGAGGAGAGCATTGGCCGACGATGCTGCTGCAAGACGTGCTGCAATGCCAGATCTAAG
GGAAAGGTCGAGACAAGAATACCTGAAGAAGCGTGAAGCGGAGCGTCTCGCTTTGCTGAG
GAGACAGGTCGAGGATGAAACGAGGGAGCTGAATGATCCTTATTCCAATTTATCAAAGAA
GGAGAAGGCAGATTTCGCCAAGAATAGAGAGCTGCTTCGACTCGCTGATGAGAGATCAAG
AATTGATGATCACCGTGATGGCTATGCTATGCCAGACGACTATATTACAGAGAAAGGGAA
GCTCGATCAAAAGAAGAAACAAGATGCACTATACAAACGCTACGTCGAAAGGGATGAATA
TGGCCAGGAGAAATTCGTTTCTGAACACGAGGAGTGGGATAGGCAACAAGAAAAGCTCGC
CAGAAACCAGATCCAAAGCACAGAACGAGTCGATCAAGGCGAATATGATTATATCTTGGA
CGAGGAGCAAGGAATTAAGTGGATTATGGATTCGAAGTTACCGGGTCAAGGCATGGATAA
AGAAGCAAGATTCTTAGGTGAACAACTGAAGGCTGCTGAGCAGAAGGCAAAGACAATTGA
GGAGACGAGGAAAAATCTTCCAATCTATGCTTACAAAGACGAATTTCTGGCTGCCCTTGA
TCAGTTTCAGACTATTATCCTTGTTGGTGAGACAGGATCTGGCAAAACTACACAATTGCC
CCAGTATCTACATGAAGCTGGGTATACTAAAGATGGGATGAAAATTGGAGTAACGCAACC
TAGGAGAGTGGCTGCCATGTCCGTTGCTCAACGTGTGTCAGAGGAAATGGGATGCAAGAT
CGGAAACGAAGTTGGTTACGCTATCCGTTTTGAGGATTGTACAAGTGACAAAACTCTCAT
CAAATATATGACGGATGGTCATCTTTTGAAAGAGGTCATGATTACACCTTCTCTGGACGA
GTATCAGGTGATTATGATTGATGAAGCCCACGAACGGACTGTGCATACCGATATACTTCT
AGCTTTGCTCAAAGATCTTGCCAAAGAAAGGCCAACAATTAAACTCCTGATTGCTTCAGC
GACAATTAATGCACAGGCTTTCTCAGACTTCTTCGATGGCGCTCCTATCTTCAATGTTAA
AGGGCGTAGTTACCCAGTCGAAATTTATAATACCCCACAGCCAGAAGCAAATTATCTTGC
TGCAGCCATTACTACACTTTTTCAGATACATACCTCTCAGCCAAGTGGCGATGTGCTGAT
ATTTCTAACAGGTCAAGATGAGATTGAGGCAGCGGAAGAACGAATAAGTGATATTTCAAA
AAAATTAGGTTCGAGAGTACCCGAGCTTGTTATTTGTCCTATTTACGCAAATCTTCCAAC
CGACCTACAAACCAAAATTTTCGAACCAACACCTAAAGGAGCACGAAAAGTTGTGTTGGC
AACCAATATTGCAGAGACGAGTTTGACCATTGATGGCATTGTGTATGTCATCGATCCAGG
ATTTGTAAAGGAGAATATCTATAATCCAGCGACTGGAATGTCAAAGTTGGTTACAGTAGC
ATGTTCACGAGCGTCTGCGAATCAAAGAAGTGGTCGTGCTGGTCGTGTAGGACCTGGGAA
GTGCTTCCGCTTGTACACCAAATGGGCGTTTATGAATGAAATGGAAGAAAGTACCACTCC
TGAAATCCAGCGAACAAATCTGAATGGTACAGTTCTACTACTTAAGTCACTTGGAATTAA
CGATCTCTTGACTTTTGACTTTATGGACCCTCCACCGACAGAAACTTTAATTGGTGCTCT
CAACCAATTGTACGCGTTATCTGCATTGAACAACCGTGGGGAACTAACCAAAATTGGAAG
ACAAATGGCCGAATTCCCAACAGATCCTCAAGTTGCGAAGTCTATCATTGCTTCAGACCA
ACTGGCATGCTCTGACGAAGTATTGAGCATCATGGCAATGTTAGGTGAAAGTTCGGCACT
ATTTTTCCGTCCCAAAGGAGAACAGAGAGTGCATGCAGATAGCGCCAGAGCGCGCTTCAC
GATCAAAGAAGGAGGGGATCACCTCACCTATCTGAACATTTGGAATCAGTGGGTGGACAA
TGATTTCAGCACTATCTGGGCTAAAGAAAACTTTCTTCAACAACGTTCCCTTACTCGAGC
TAGGGATGTTCGAGACCAACTTGCAAAGCTCTGTGAACGGGTGGAAGTTACAATTGCCAG
TTGTGGGGCGTCAAATCTGGAGCCCATTCAAAAAGCGATTACGGCGGGATTCTTCGCTAA
TGCGGCACGATTACAACGAGATGGAGATAGCTATCGGACAGTGAAGAGAAATACTACAGT
GTATATACATCCTTCGTCAGTATTGATGGCAAATGATCCCCCTATCAAGTTGGTTGTGTA
TCATGAACTTGTACAAACTACAAAGGAGTACATGCGCAGTTGCATTCCCATCAAAGCAAA
TTGGTTGTATGAGCTTGCACCCCATTATCACAAGAAGAAAGAGATAGAGGAGATGGGAGA
AAAGAAGCTGGCAAATCGGAGCAGGACATGATACCATAGCACATAGCACGTTGGACTTAG
CCTGACCATCAATCATCTTTCATGAAATTGGATGTCTCAAAGATTGAGATTATAAGTTTC
TACTTTTCAACCTTGATTTTTGTCTTCATGTAGATACCCTTAAGTTGAGAGGGTTATAAC
CTCGCTCCATACTACTATTACTTACAGACTTGTTGAATCGCATATTATCCCGAGCGAAAT
TCCTACTCATAATAATGCACAACTGTTCC
>3b4041cd-572a-4ca4-bcb5-4581f838201a (mRNA) 892 residues [Bfab07:227339-228230 + strand] [genomic] name=Bfab07g00600.1
TGACGGAATGGGATGAACGACAATTCAAAATAAACAAGTGAAGCGGAAAAGAAAGAAAAG
ACTGGGCAAAATGAACCGCACTTCGATGAGTCTCTTAAGGGGCTCAAAATACCTGGCAAG
GAGCGGCGCATCCATATCACAACGACGATTTGCATCCTCAGAAACTCCTTCACCTACTGT
AAGCCGTCCGCTTTCTCTCACTAGATGCATATTTCCAGTTCACATACTGTCCCCAAGTTG
GTTCTAAGTTGGAGCTAATACCTACTAAGCGCGCATTCTACAAAACTTTCACTCGCCCTA
TCGCAAAAACTCTCCTGATAGCAACTTTCATATATCAATTGACCTATTGGGGTTGGGTGA
AATTGGAGAAGGATGAATTAAAAGCAGGCAAACGTAGGGAAATAAAGGAACTCGAGGAGG
AATTGGAGAAAATCAGTGGAGGCGCTATTAAGGGCGAAGATGTGAAAGTCAAAGGTATCT
AAGGAGAACTGGCAATATTATGCACGAGGATCAAGCACATAGTCACTTGTGCAGCGTGGA
AATGAAGATGGAGAATCATTGCGACCAAATGAAGTCGCTCTCATGATCTGGTCATGGTGG
CTACTACTTAGTCTCCAATATACAGTCGCAATCGCTGTACCGCGACGACTTACAGACGAG
ATATCGTTTGCGATATACCTATCAGATTCATGCTCGATTTTGCGCAAATCGAAATCATAA
CATAGATAAACATTTTGTTTGTGTGGGGCCCTTCTTGGAATCCGATCGACTACCATTGCG
AAGACATCAGTTCCAAAATATGAACATAACTATAATTCCAAATTATGGTAGCCATCGTAC
CTGCTTGTCTACACTGCATCTTGATGTTTCGCCGAGAGGGGAGGGCGTGTTG
>fbad3779-2b43-40a4-baf2-7a15a4010cb9 (mRNA) 4921 residues [Bfab07:229067-233987 - strand] [genomic] name=Bfab07g00610.1
AGGGGAATTTGCTAAATTCGAATTGTCAATGAGAGTTTTGAATAATGGTAAGTTATATCG
AGGTCGCATAAGTATCTTAAGTCCGACCCTTGGTCTAATCACTGTATAGGATTCAAAATC
TCGAATTGCGCAAGAAAAGCTTGCTGGGCTGGAGAAAGCATCGGCACCGTTCGAGGAACA
AATCCGTGAAGCTGGAAAATTTGTTGATATTGATTTGGATAAGGTCGCTACTGTTCTGGA
TCATCAAAAACATGAAGAGAAAGTCTTCAAGAAGAAATGTGCGGCAGGTTCGTTTCATGG
TAGAGAAGAATGGCTTCTACGATGGCTTTTGAAGAAATTGCAGTCTCCTAAGGATAAAAC
TGCCAGGTACATTGTTGATTACGTTCTGGATTGAATATCATGAGCTAACAATGCTCCCCT
AGAATTACACCGTCATCATGGCACCTATTCCGTTTATTATTGAATGCGATCCCGCTAGCG
AATACTGCACGCATGCTCACCGAAAAGAAGTTTATCGTAACCCTACAACAGACATTACAG
GAAGCCCAAGAGATCAACGACATTGACGATTCTGGCATGGAGGCACAAAATGATTCAAAA
TCGGGGTCTGACTCAGGGGAAACATCAATCATCTCGAAAAAGCGCAAACGGACCGGGGAA
CTAGTCACCCACACGTATCATGGTCCAGCCAACGGGCTTCGAGCTTTAGTTATGGCGATT
CATACTGCTATCAATAGTATCGTTCGATCGACCAAAGTTTCTTTCTCCCAAAGAACGGCA
GGGAATGGTCGAAGTCCAGCCTTTACCACGGAGTATATGCGAGCCGTCGTACGAACCACG
CCCGAATCGTCCGCCATGGTTCTAGGTTCCTGGGTGTCTCTTTGCCAGATGGTTTTGAGT
AAAAAGGCTGGTGTGGTTATATCGCCCCAATTGATGTCCCCCTTTATCGACATCTGGGAC
TACCGCGTGGCAGGAACCGAAGATCTGATGCAATTTTCTCTTCACTGCTCAGAACCTTTA
CTAGCATTGTTCAAAATGACGAAGGTAGATTCAGCCACACAGGATTGGAAGGAAATCTTG
GAAAAATTGATTGCTCGAAATATCATCATTCCTTCAAAAGCGAGCGCCGGAGAGAAACAA
GATTCTACGTTGTTGCAGAGTTTGACGAGAGTCCTAGTTCTGCAAGATGTTGCAAACGCT
CCTATTCTTTTTGATATTGCGATCCGGTCTTTGCAGTCGAATGGAGACCGCCGAAGACGA
CCATCAGATAATGCCTGGCTTCAGACAGTATTCACAACCTTGAAAGCTGCCATGCCCCCA
ACTAAAACAGCGGCGCATAATTCTGCCATCCGCGAAATACTTCAGCGCTCCATTCAACAC
GAAGTGGATCTTGGCCTCCCAGAACTTAAAAGTTTAACAGCGGAGTATGTTGTACCTGAG
GGAAGCACGGATTGGTACCTTCTAGAAACCGTGATGAAACTCGATGCAAATGTTTTCCTC
GTCGCTGATAACGACAAGAATTTATTGAACGATGTATTGGAGCGAATTACTAACGTATAC
TTCGAATCTGCCTGGCCCGAGCAATCTCGACATATTGTATCCGGGATTGTCGTTCCTTTA
ATGAATGAATTTGCCAAAGCTCGTGATCTGTCGGGATTTGTGCGCCACTGGTACTCTCAG
CTTGTTAAGTTTGAGCAAACACGAAAGGAAGACGCGATGTTCCCGGCAGAAGCCTTTTGT
GCTTGGGAGGATGAAGCATTGCAGATCGAGCTTCCTAAGGTTTTGGAGAATTCCTTAACT
GTTCAACAGATAGTACAGTTAGTTGATTGGCTAGCTATGGAGATGGTAAACCAACCTAAC
GCTGTCGTAACCATCCTTGAAGCTATTGCAAATTCAATTTCTAAAGAAGATGTTGTAGAC
ATCATTGGAACACGTTTGTACCATGTCATCTTTGATAACGGAAATTTTGGCAAGTTGAGT
GACAGATATAGCTGGCGGGCTTGGAGGGTTCTGACTCGATCCTTCCAATGGATGCAACCT
CTTCATCTAGAAGAAATTGCTGGGCTGTGGGAGCAGCAAGCGAGCCCCTTTACTATATTG
TCTACCCATACGTTTGGTGAGAAAGAATTGGATAATTTGGAAATCTTTCGATGTGCATGC
TCAGCATGGAATGCGGCTGAAATTGGAACGAAATTGGAAAATCTTTCATCGCCAGTGGTT
TTGCGCTGCCTTGAACAATTAGGCCCTTCTATTGGTGCCTTGATTGATCAAAAAATGGCA
AATATCGAAAAGTGGCCCATCCATCTCAACACATTATCACGAGGCGCTCAATGGACTGCA
TGGTCATTTTATAATTGCATCTTTCAGGAATATCCTCGTGCCCTAGAACTTGGCATAAAG
TTACAAGACAGTGCCTTTGAGTTGCTGTTAAAGAATATCCTCTGGATAGCTTCTTTGGCT
AAGACCTCTACAACTGAGCATGTATTGAATCATGGAGCATTCGCCGCTTTATGGTTTGGA
GTACTGCGTCAAGATTGTGTACTCAACCACTCGAGCATCATCAGTCGATTCATCGATGTT
CTGCTGAACTGTCAGACTCAAGAAGAAAATCCTCTTACTGCTACTTTTACATGTAATTAT
GCTGTCATTGAATCTCTAACACAACTTCCATTGGAGGTGATCGGCAAGAAGTACAGAGAG
CGGATTATGCAAAGTTGGTCAACAGATCTCTTGGCACAATCCCCTGAGTGTTATCCCGCT
GTGCTAGCATTGAAATTGAAGATCATGCATCGCCCTACATTTTATACAGTAAGTAGAACC
GGCAGAATTCTAGGCGTCGCTAATTCAATACTAGGGCATGAAATACAAGGATTTCGAAGA
AATTGAGAAATTGATCAAGAAAGTCGGGTTCGAGGAGATGCCCAAGCGATTGGAGACTCT
TTTTACATTGAGAGAGCTTGTTAAGTTGACTTTGTCGTACGTGTCCTTCATACTGATATT
ATCCCGGCTGTTTGTTTACTGATCTATATTAGACATGTGACTAGTAACTTGGATCAGTAT
CAAAATCGAAATTATGTCTTAGATGCCATAAGTTATCTCCAAGATAAACTCTCTAAATTT
ACCAGCGACGAGAAGAAGACCAAGGGCGAGAAGGCTTTGCCTTTCATCTCCACATCACAC
TCATTACTTACTGTTCTTATTACCAAATCGAAGCAACTTGATGATCTAGCTATTGTCAGC
AACCAAGATTTGACTGACCTTTGCACATCCTTCAGAAAATTTCTTCTCGTCCAATTGCAA
AGGCGACTGAAAAAGAAGCCTAAGATAGATGAGGTTGGTAATCATAAGGATGGTTCATTA
TCGGTCGTTGTTGTTCTCCAGGCTCTGGAATCTCTGGACGTGGATTCATCAGAGCTTGAG
CCTCTCGCAACAGAAGGTCAAGTATATGCTGCGAAGCTGAATGAAGGAAAGCCAGAAGTG
GATGGTGTACGTCAACTATTGCCGGAATTCTTTGCTACTCGTGCGTCGAGCAACGAAAAT
GGAATCCTCCACATCTCTTTGGAGGCTTTTATTAACACATCTGCCGGTAGAGCTGGCATC
AAGAAAAAGATGGACACAATTACCTCCGGAATGGACAATGCGGAAAAGTTACAGCTGGTT
CAACATTTAATGGGCGAAGAACTGATCGGCTTGAATCAACTGGATAAGTTGGTAGCTATC
AGATGTGTTATTGGCGCCTGCGATAGTATGTCCAATGTGCTTTCATCTCCTGCTGGTTAT
AGCTAACATTTGACAGATATTGGACATGAGCCTGCTGATGCAAAGAATTCCCAAAGATCA
ATGGATCTCTGTCAAGCTTACGATCTGTTTTGCACACAGATTATCAAGACCAATTCATAC
CGGGTATTTTCTCTGCTAGGGGAAATTATGGAGATGATGTTAAAGACAAAAGTATGAGTC
TCAATTTCGCAGCCTTCCCTAGATATAGCTAACGAATCTGTAGCGTCGTGCCCTCTCCCA
ATGGTCCGTTGATCGCACTCTGGCAATACTTGCTATAATATGCTCCAGCAAAGGACCTTC
TCTTCCTACTTCACAAGCGAATAACATCTTCATTCGTCTGTGTGCGTTAATGAAGGTCGT
CCTTACCAACCACCGCTTCCGTCTTGAGGGTCATCTTCATTGTGTCATCCAAGTTCTACA
GCCTCTTCTCCGCTGCTTCTTTACAGCCCATTCGCACACCTCTAAGAGGCTTCTTCAGGC
CTTTACCCCGCCCCCTTGGCTCCCGCAACTTCAACCAGGCATAACTTCATCTTCCTCGAA
TACCCTTTCTCCCATAGCCGCCGAATCTTTTACCCGTCTTCTCACCCTCATTTGCGACCC
TACACCTAATTCCATTTCTCATTCATCCATGAACAATCTCACGTCTGCTGTCGCCAAAGC
CAAAAAGATCGCCGGTCAACATATGCACATCATACTTCAGACATACATAAAATTCAACCT
CGAAATGACAATGAAGTCAGAAGTTAGAACTGCTATGACACCTGGCCTGTATGCAATATT
CGGGTGCACAGATATGGAAGGACGTAAGGCTGTGGTTGATGGGCTGGATTCCAGTGCTAG
GGCAGTTTGGGGAACTTTATATAGAGATTGGGCTCGATTCGGAAAATGGAAAGGTGCTTA
AACCGAACATAGTTAAGGTTTATATGAAGAATAAGTGGGATTTAGTTGATATAGTGATAT
TCCACATATGCTGAAGTGATAGACGGTTAGATAGATACCACATTTGGAAAAGCGTAATAC
GATTGTTCAAAACTACCTCTACTAGACTCTTCACAGTTTACTTTTGGTTACGTCATATCC
TACTCTTGCTTCTACACAACTTTTCAATGGTACAGCTCTGTGCCACGGTTCTAAATATGA
A
>88939bcb-2067-4d9a-8918-8bfcb073f4bf (mRNA) 1502 residues [Bfab07:234145-235646 + strand] [genomic] name=Bfab07g00620.1
TTGTTTCTTCCATGCACATAACCACAACACAATTTCAAACGTTGCTCATTGCTAAATATG
TCTCAAGACGAAATTCTACCAAGTAATGAAGGTACTATTGCTGTCGAGGGTATCTCTGCC
TTGACTATCCAGGATCCTGAATCATCCGTGGCTAATGATCGTCCCGAACTTCCCCATCGT
TCTCATGATCCCGAAAACAACATGAAGAGATCAGATCCATTTCAATTTGGTTCTCGATAT
CTCAGTGAAAAAGACAACGTCTTCGAGTTCAATGCATGGGATCACGTCGAGACTGATGAT
ACTTACAAGGAGTATGCAGAACTACAATATGCGAAACAACGCGAAGCTCCTGTATCGGAA
TTTGACAAAAGTACGTATTTTCCGCTTTCTCTTTTCCCAAAACACTGTGCCAAATCTTGG
TACAGTGCTACTATGACGATAAATCATAATTCATCTGAGGTTACTAGCCTCTGAATGATA
CAAATATAGCAATGTCTTTCGCTCCTATCTGACTGTAGTTTACTTTCTGAAACTATTTGA
CCTATGGTTTTTATCAAAAACTAACAGATTTCTCAAGGCAGATTCAATTCCGATCCCGCC
AAATGGTGGAACAATTTCTACAAGAACAATACTGCCAATTTCTTCAAAGATCGAAAATGG
CTCCAGCAAGAATTCCCCATTCTTTCTCAAGTGACAGAGCCAACCTATGGGCCTTGCACA
ATTTTGGAAGTTGGCGCAGGCGCAGGTAACACTGCTTATCCAATATTAAAACATAATCAA
AACCCTGAATTAAAAATCCATGCTTGCGATTTCTCCAAGAAAGCAGTGGAAGTGATACGT
GCGAACGAGGCATATGACACCAAGAATATCCAAGCAGACGTGTGGGATGCCGCTGGCGAT
GACCTTCCCCCTGGATTGGAAGAGGGTAGTGTCGATGTTGTGATCATGATCTTTATCTTC
TCTGCACTTTCTCCTAGTCAATGGAATCGAGCCGTACAAAATGTCTTCAAAATCCTCAAG
CCAGGTGGCGATGTGCTATTTCGAGATTACGGCCGTGGTGATCTTGCTCAAGTGCGTTTC
AAAAAAGGCCGTTATCTAGAAGAAAACTTCTACATTAGAGGTGATGGAACTCGGGTATAT
TTCTTTGAAAAGGACGAGTTGGTCAACATTTGGACCGGAAAACTTCCCGAGTCAGATGCT
CAGGCTACAGATTCAACGACAGAGCAAGAGTGTGGCTTCGATATTATTGATCTAGGCGTT
GACAGAAGGTTACTGGTTAATAGAGCCAAAGAACTAAAGATGTATAGATGCTGGATGCAA
GGCCGATTCAAGAAGAAGAGCTTGCCTAGCACCAATCCAAAATAAATTTTTCATCCATGA
CACACTGTATTGATTTTTGTTTCTTGTGTATTAGGTGGTGCCGAGATTTTGAGAACAAAA
TCTCTTGCTATAAATGAGGCTTAAAATCCCTTACACTCCATACGGCTCCTCTTCGGCGAT
TA
>799a3632-eef3-481b-b199-823782cee5f5 (mRNA) 1855 residues [Bfab07:237040-238894 + strand] [genomic] name=Bfab07g00630.1
GTAATGGTATTCATTACTTTCCTTTCGACAACTTCTACAATATTCTAGATACCATCACTA
CGAAGTTCTGGTAAATAGAAGGACAAGACGATTGATAAGCTTGGCTTCAGGCTGTCAAAC
TAAACCCCTCTCCACTCAAGTACCTTGCTACCCCTCTGAACTTTTCATTTGGATTGTTGG
ATAGCAATCAACAACAATGCCATCGAGGAGAAAACAGCTAAAGAGAAAACAACCTGTCGC
GACTCGCAGCTTAGCCAGACTAGCTAAGAAGCATCGAGCCAACACGCCAGAAGAAGATGT
ACAAGCACCGCAGCGAGATATTGAGGAGCCAGAAGTCAAGGCAGAGCTCGAGTCAAATGA
TAAATCACCAGTTGCTAGTAGGTTATATCACTCACCATTTTCTTGGAAGATAATCTGAAA
TTGCTGTTAGCTAATCCCGGAATCGAGGCCGAAATGTTTGATGATGGCGCCGATGCAGAT
GATGAAGCTGAAGAGTTCCAAGGAGAAGGCAACGACGAGGATGAACGACACGAACCTTCC
GAGAGGGGACCAGAGGTAGGAAAGTCCGATGATGAAACGGATTATGAACAGTACATAGCG
TACGGCTCCGACGATCCTGAGTATCAGGAAATACGACGCAAACGTGGTAAGCATTATTCT
CAATCCCGTGAATAATTCAGCTAATGTGGTGAACACAGAGAATGAAGTATCGCCGTTGCC
CAGGATACCGACAATTCCTCGATTGATTACAATACTTCGTGGTAATGGCAGGGATACCTC
GGATCAACGTCTCACAGCCAGTTCTGGGAAGAATAGACTCCCGAACTTTTTCGATAAATA
TGGAACCCGGCATCACATCCCTATCGAGATCTTCAAACAAATATTGGACTACCTGTATCA
ACAGAAAGATTTCATTACCTCTACTTCGGTATCCCTTACCAATGTTTATAATTACGGGCT
TGTCTTCGATATTTTCGGACTCAGTATATGTAGGAGAATCAAGGACTTACTACAAAACCA
GCCAGTGGAAGCATGGGAAACAGGCTTTTTTGACCTCCCAGTTCTCTTTGCACCACCCTC
AAGGCCCAGAGTTTGTCTTCGAAACGTCCTTCATTCGTGGTTTCCAGAAAGGCTCACGTG
GATCCAGTATGGTAATAAATGTATGTATCATGGTCCGATCTCACTCAAGCTTATACGAAG
ATATATAAGAAGAACTGAGGGGGAAGGACAACGGAGAGCGATTAAGGAACATGAAACACG
ACTTAGAGAAGGCCGGGAGAATAAACTACAAAGGCAGAGAGACAGAAAAGAGCGCATCGA
AAATAGACGCAACAGAAGAATTGCCAGGTTGTCAGAAACACAAGAAGCACATGCCGAGGA
CTCAGAATTCTCAGATGATCACGATTGCGTTAAGAGCCAATGCGCTCTTAACCCCGAAAC
GGCCCATAAGAAAATACAGTATGTCTCTTCAGGGCGTGATCCGATAACCGATTCCGAGGC
AATGAATTCTTTTGCCGAAGACTCGGATGATATGGGATGGTCGACTGAGGACTCAATGCC
AGCATCATAGTTTAATTAATAACATGAGATAAACGTCAGCGATTGCAACGCTCGCTGATT
GTGATGTCTTTTACTGTGCAGTCGTCGAATAGGTGGCGGAAAATAAGGCTGATGTCAATT
TTGATGTAGAAAGATCTAGTCAAAAAAACTGGAGGTAGTCAAAAGTACAATACTTTGACT
GATTGCGTATTAAGTGGGCGTAGATGATGGATTGCTAGTGGTAAATTCAGCAAAATACAT
TTGGGAGTGGTAACTGCATGAACAAATAGAGGGTTTTCGATCTGGTGTATAATCC
>632b4180-8924-4401-a8b3-2b01ea25992a (mRNA) 1844 residues [Bfab07:239213-241056 + strand] [genomic] name=Bfab07g00640.1
AATCTTTATATTGTCGCAATTGACAGCCTCCGCAAATGTATTAGTGTCGTGGGTTTTCCC
TCAAACAAAGAGGACTTGACTATCCGGGAATCCAAGAACTTATTATTATAAGAAATAAAT
CATAATGTAGTGAGTAACTTTTATTCTCCACCCCATTTTTTTATATTTTTGTGATCGATA
TATAACATCCGTAACAATGGCACGCCAATTCCGTGTACATGTACCAGCTGTTCATGTGCA
GCCAACCTTCCATCTGATCGAAGCAGAGATCCTGGATCTTTCATATCAAGCACTGGTACT
ACAGGTTGATGGCACCGTGAGGCTGGATAAAACGGCAATAAACCCTGCCGCCTGGAGAGC
TCGTGCAGGTGCTGAATTAGTGGGCGGTCCAAATGGCATCCCCCCTGGTCGTATAAGAAA
TAAATTGGCAGCGCTACCAACCGGCCCTCAGTTAAGAAATAGCTGCACAATGTCTTTTTC
TGGTACGTGGGCTCCATGGGGACTTGCTAGAGTGTTTGGATAGTAAATAATAACGTTCAA
ATGTGTATAGGTCAATTAGGAACGTTTGGAACCCCTGGAGCAATGCCGCTTATGGTACTA
GCTGTTCGAGTGGATGATCCTAATGATGGCACACTTCAGCCCCCTCCACTCGGACTGGCA
ATTGGAAAGGCAAATCATGATTACTTTTTAAGGAAAGGAATTTCCCATATAATGTCCCGT
GCAATGAATATTAGGAAAGGTATCCCCAACGATTATGACCCCAACGATATGGAACAAGTA
AATGAAAACAAATGGCGATCCGAACCGCCTGTATCTATTGCGTTCCCTCTGATAGGATGT
AGAACAGGGTATGGGTTTATTAATGCAGCCGAGTAAGTTTTAATTTTTTTACAGAATGTA
TTGTCTTTAGTTTTCAGTCGTGCTTCCCGAACCATTTTTCACTTTCGTGTCTCCTCACAA
TACATCCGGTTGACTTCCTGAAGTTGTTCAAACCCCCTCATTGGGAAAGTGCTGACTTCC
TGATTTTTCAGAAATATTCTGAGCGCAATCATTGGGTGGTACAGAGATCCACAACACAAC
GGACAGTTTGGAAATGCTGCAATGCGCGCTCTCAGCATTCCAGATATATATCTCGTCGTT
CCTCCAAGAACACCTTTAAACGTACGTCGTCTCAAGCCTGCATTGATTCGATCTGCCTGG
GAAAAGGCATGGAAGTAAGTGATTATCCTCCGCATTTCTACTGTACTCTGTTTCATAAAC
TACAGAATGTCTTATGATACAGATACTGACTGGTTTATCTATAGCCGATATATGCCACCA
CCTCCGCCTGCTGCTGGTGCTCCACCCGTACATTTGTCTAGAGAGGCCAATGGAAACCAG
TTTGATCAGAATCGACAACACACAATGCCAGGTTGGACACCAAATCTTGGTAATGTTCTA
TTAGTTGATGGTGTGGATGATGTAGCAGGAGGGTTTCCACTCAACCTTACCCCATGGGTA
CGAGAGAATATCACTGATGCCTGGGTCAGACGTAATTGTAAAGTATTTAGAGGAGGTAGA
ATAAGGAGAGTGACTGTGATTTGAATTTGATATAAATTTAACGGGGAAGGGAGGAAGGAA
GAGTGTAGACTAGAGGGAGTTGCTGAATTATCATTTACTTGGAGAACAGAGCTTCAATCT
TTGCGAAATTCTAATCTCTAGAGGTCCAGAATGCCCATTTTACCCATGACTTATAATAAG
AATGAAACGATTTCACTTGAGGGTGATTTGTACCAAGGGCAAGGAAGAAAATGCCACGAG
AAAGAAGTATCAAACAACAGTCACATGCTGCATTGTAATTCGAA
>965318b3-5081-4d20-ac72-a3c62cc43117 (mRNA) 1407 residues [Bfab07:242008-243414 + strand] [genomic] name=Bfab07g00650.1
GCGGTATGCAGCACGAAAATGTTTGAAAGTCTAAGCAAATATGACGCGAATATACCATAA
ATTTATTGAGACATGGAGATATCGGATTTGAACATTCCGCATATTATAAGAGTATCTATA
AGAAGATAATATTCCCTCGACTTCGACTGCTTCAATTTGCTTCAGTGCAACAACAACAAA
ATCTTAAAACATGACTTACAGGAACTCCATTATCATCACTGGCGGGACCATCAACCTAGG
CTACCAGACTGCTCTCAAGATAGCAAGAGAACATCCAGACTACCTCGTCGTCATCGCATC
CAGGTCCGATGAACAAAACTCCGCCCAATCCATCAACAAACTTCTACATCAAGACAATGC
TATTTTCATGCAACTCGATCTTTCCGATTCGAAAAGCGTTCGAAATTTTGCTACGAAATG
GATCGCTGATTCCACGAAACCTCAAATTAAAGCTTTAGTTTTGAACGCCGGTCTTCAATT
CCCAGCCGGTCTCGTGATCACACCCGAGGGATTGGAAGCAACTTTTGTGTGGGACATGCA
CTTCTTTTCTTCCTCTTATGTCCACATCTCGCGCCTGATTCCCGCGTGGTTTTCACATCG
AGCGGCACACACGATCCTACGCAAAAGACTGGTATGCCTGAGCCCGAATACAATACCGCA
GAGGATCTCGCCCACCCTCCAGAATCCATGATTGAGATTCCAGGACGCAAGCGTTAAACC
ACCGCTAAGCTTTGTAACGTACTATTCGCCTACGCTATATCACATAAACTCACAGAACGG
GCCCCCGAGCGCCATATCACTGTTACAGCAATGGATCCTGGTCTTATACCCGGCACTGGA
TTGGCAAGAGAAGCAAACAAGTTCGAACAATGGCTTTGGAATTCTGTTCTGCCACACATG
ATTTGGTTGCTTCGTTTACTTGCAACACCAAACACGCATACACCAGCAGAGTCAGGTACT
GCACTTGCTAGACTTGCGACTGCTGCTGATGTCGAGGGCACGACGGGGAAGTACTTTGAA
GGACTAAGCGAGATCAAGTCGAGCAAGGATAGTTATGACGAGGGTAAACAAGAAGACTTA
TGGAATTGGACAGTCAGCTATTTGGCAAAGGACCCACTCGAGAAAGCGAAATTCGAGTCG
CTCAGATGAAAGCAGACATTAAAACAGGTCAACATAAAACTTCTCTTCGCTTTTCAATCT
GTACTGTAAGAATATTCCTAATGAATCCTGCAAAGATTCCGTTCCGCCAGCCAAGAAACA
ATGATTCTCGTTATGTCTTGTGGCTTAAGAAAAGACCCTGAGAAGCTCTAGATGCGTGAT
TTACACGAAGAGTCGAAAGACATACCGCTGTTTTTATTGATGGATGAGGAAGGTCCTTTT
AAATGGCTCGAGGATGGTACACTGAGT
>7a5f8835-b7b6-4013-9e2e-8cc22bae8984 (mRNA) 2324 residues [Bfab07:243711-246034 + strand] [genomic] name=Bfab07g00660.1
TTTATCATGTTCTTATGTACACTTAAGAATCTTCCAATTCCCTTCTGATGTTTCTCTGAA
CCTTGTTGTATTATATGAATAGCAAACGCCTCGAATTATTCCCCTTTCACGCATAATTTA
TAACCTTGAGTGCTCGAGCCATTCTATATCCCTCGAACCGTCATAGAATCCAGGGCATCA
ATAGTAACCAAGATATCGACAGGATTTCGGCCCCTCAGAAATAAACACCAAAAACATGAG
AGACTATTCGAATAACGCATCGAGTCCTAAATATGGCGGTACGGATCAAGTTAGCGAGAC
CCCCAAGACGGGAGTTGGAACACAAAGCAATTTCAGTCAAGGTACAATTAAAAAACAATC
CTGATAATCGACTAGACTTTTTAGCTCTTAATTTCTGACTCTCAAACAGAAGAAGGAGAA
TCCGCTTATCAAACTAATGATGCGCGCCGTCAAATTGGCCCCATTTCCGCCATTTTCTTG
ATCTTCAATCGCATGATCGGAACCGGAATCTTCTCGACCCCAAGTACCATTGTTGCACTT
TCCGGATCTGTTGGGCTGGCACTATTTATCTGGGTTGCAGGTATGCTGATTGCAGCAGCT
GGTCTTGCAACATATATGGAATTTGGTACCGGACTTCCACGAAACGGTGGCGAAAAGAAC
TATCTCGAATATGTATTCCGAAAGCCTAAGTTTCTCGTCACTAGTATGTATGCTATGTAT
GTAGTACTACTCGGTTGGGCGGGTTCGAATTCCGTGGTATTTGGGGAGTATATTTTGAGT
GCCGCCGAAGTTGAGGTAACTCGTTGGAATCAACGTGGAGTAGGATTGGCCTGTATCACA
GCCGCTTTCTTGATCCATGGGTTTTCTATAAAATGGGGATTGAGACTTCAAAATCTTTTG
GGTGTTATCAAGCTTCTAATTCTTCTCCTGATCATCATCTCGGGCTTTGTTGCGCTTGGT
GGCCATCTCAGAATCGAGAAGCCAAACAATTTTACAAATGCTTTTGAGGGAACGACTGGT
AGCGCGTAAGAAAATACCCATCCCATAAACAACATCATCATCTAACTTTGTGTAGCTACG
GAGTTGTCACAGCTCTGTACAACGTCATCTGGAGTTATATCGGCTATAGCAATGCCAATT
ATGCGCTTTCCGAAACCAAAAATCCGGTCAGAACACTCAAGATGGCCGCGCCTACAGCTC
TCGCTATAGTCGGCGTGCTTTATATGCTTGCAAACGTATGTTGGCGATATCAAGATCCTC
CACAAATAATGCTAATGTATAAATCAGATTGCATATTTTGCCGCTGTACCAAAGGAGGAA
ATCATGACTTCGGGTCGTATTTTGGCTGCTTCATTTTTCAGAAACATGTTCGGATCCCGT
GCCGAGCGTGTATTGTCTGTTTTCGTTGCCCTTTCAGCATTTGGGAATGTCCTGAGTGTC
ATATTCTCCCAAGGCAGAAGTAGGTTGCTTCGCATGACTTCCCACAAAGTATTATTCTAA
CAATTCTTAGTTGTACAAGAAATTGGTCGAGAAGGAATCTTGCCATTCTCCCGACTTTGG
GCAAGTAACAAGCCTTTTAACACACCATTCATGGGCCTTTTCGAACATTGGCTGGTGTCT
GTGATCATTATGTTAGCTCCTCCACCTGGAGATGCTTACAACTTTATTCTGAAGTATGTT
CCTTTTTACTCAAGATCTTGCTATCATTCAACTAACACCACTCAGTGTTATCTCATACCC
ACTTGCGGTAGTAAACGTCTTTGTATCTCTAGCTTTGCTTATCCTTTATGCTCGACCATT
CGCAGCTGATCGCCATCCACAACATTGGGCCCCGCCTTTCCGTGCTACTTGGCCTGTGGT
TTTATTCTTCCTTCTCTCGAATGTCTACCTTGTCGTTGCACCATTTGTTCCACCCGATGA
GGGACAAAATGTATACGAGAGTTTGCCATATTACCTTCATTGTGTTGTGGGTATTGCATT
CTTCGGCGCGGGAGCTATTTACTGGTTGATTTGGGCCCAAATACTACCCAGAATTGGTGG
ATATAAACTCGTTCGAGAGAATATCGTTACTGATGATGGATGGAGTGGAAGTGTCTTCAG
AAGGGTCAAATCAGAATAGATAACGAGAAGCAATTGGGCTGACAAGGGAGCAACGGAGTA
CAAATTATTGGTATCAACACTATATAAGAATAATGGTAATAACAACAACAAATCCAACAT
GTAATAGAAAGTAAACAATTGAGGTTCTGATGATCGTTGTTGTTATCGATGTATTACTAG
TTGTGTAAATAAGGCTGAAATGTTAGATCCAATCACACATACGC
>b8f0de41-773d-47a2-9361-0d4bcf18bb9b (mRNA) 2164 residues [Bfab07:246131-248294 + strand] [genomic] name=Bfab07g00670.1
TGTCAAACTCATCTTGCAGTAAGTTCACAACGCATAACAATAATGCTTCATTGAGACCCA
CATTCATCTGGATGCCTCATATACCGTGTCGTTCTGCTCGCGCAAATTGATATCTGTTAT
CCGTAAAACGATGGCACCACTACTCGAAGATCCTCGTATCCGACAGACCTGGAATCAATT
CTCACAGAACGCGGAACATGCAACAGAAAATGCTGCGGCAGGAATATGGACTTTTCAACA
TAATTATTTAAATCCTTGCTTTTCGACCATTGGGAACGGCTTCAATTCGTGTACCGCACA
ATGTTTCCCAGGACAAGAAGAAAGGGCGAGGAGATTAAGAGAACGAGGGCGGACGAGAGG
ACGCGCAGAGTTTAGTTTCGATTTCTATGACGATTGGGATGAAGATGAAGGCATTTTAGG
AGGGTGGGGAAATGATGAGTTGGATAGATTATTGGCAGGAAGTGGATCGCATTCTGGAAA
TGTGAATGAAGCACCAAAGAGAAAGAGAGGGATGAGTTACGGAACAAGAGGAAGAAAGAA
AGGATTAGAAGGCGACCCTACAATTATACCGAGTACAAGCGCTATAGGATTTCTAGGACG
TTTACCTTGGAAGTTAGGGGGAACGCTAAGATACAAACCTAGCGCTGCAGATTTGCAAGA
ACATCCTGGGGCGCATCGATCGGATTTTAATGGAGTTGGAGAGGAAGCAGATGCATTAAT
GGGAGATGATCTTGATGATGATGTGCGGGATTTCATGAGAGGACATACGAGAAATAGGAG
TTCGACGCAGAGTTCAGGGGAAACTTCAGATTCATTTCGATCGAGAGGGGATTTATTCCC
CAGTGATGAAGAAGATGCCGTGCCTTTGAGTGACGAGTTTGCAATGGTACTTGAAAGGCG
AAACACAAATTCTGGTACGGACGATAAGAGTAGTGGGAAAACGCGAAGTAGTAAAGGCAA
AAGACCTGCGCAGTCAAGGGATGTTTCACGAACCACACAATCATCACAAACCCTACGACC
AAAAGGAGTCCGTTCGGGTTCAGGGACGTCATTACAGAGTAACCCAGATCTATCAGAACA
TGACTTGATCAATACCTTGTCAATTGAGGATTTGCAATTAGAGGAGGAAAGGATACGTTT
AGAAGAGGATGAAGAAGTGGAAAGAAAACGACAAGCTGCGTTACGACTGGCGCAGGAACG
AGGGCTTCATGCAGAGGGTAACTCGGAACCTATTTTGTCAGAGCCAAAACAAGATATAGA
GGAAGTAGACGAGCCAAGCCCACCTGAAGTAGTCGACGTAGTACAAGCCACCGAACTACC
TCCAGCTCAAGCAAAAGCACAAGATGATAAAAATACAACAGAGATAAAGGATACTGACAA
CGACAAAGGAAATCATTTTGTACCTGCGAGACTACCGAATTTTGGTTGATTGCATTCGAA
GGAGTATTCAAGACAACAATGACGAAAAGTTCAAATTCTACAGATCTACCATTACCAAAC
CTGGCTTGTTCGCAACCCAGGGATTGGATTGGAATATCGCGCCCACTTTTCGTCTTTCCA
AATATAGAGACTTTTTAAACAAAGGAGAATTCCTCGTACGTACTGCGCGCGGAAGGATAT
AATTGTGCCGTCAACATCAAATTAAGAAGACGCGAAAGGTTTATTAGACTTCAAGCTACA
GCTTCCGGAAGATATTGCGGTATATTGTCGCGTCGCGTTGCGCTGAACGGATTGGTAAAC
TACAATAGCGCTCTCCAGAAGTTAAATCTTGCGCAAAAGGTCCTGCCTCCCTAATAAGAT
TTGTCTGCACGACTCAGCAGCGTGCAGAAACGTCAAAGATGATGGATCGTGAGCCAAAGG
AGCCGGAACAGAATACGAGGACGAGGACCAGAGGATCGTTAATCATCCTACTACGCTACA
GGTGACGGACGAGCGACAGACAGAAATCAATCGTTGGTAAACCATCAGAAGTTCAGAACA
GACTGGCGTTCCCGGAGACGGAAGAAAGAATGTGCGAAGTGCTCGCTATTCTGGAATGAA
TGGTCGATAACCCTGGCTGGGTTGTGAAGTATGTTTTGCGTGTTGTAATTTAATGCGCGT
AATAGATATGGAGTATGAGATGGGATGGGATGGGATGGGATGGGATATCTATAGATACAG
TGGT
>be62dc66-e0c1-40db-a66a-597041ab2799 (mRNA) 1458 residues [Bfab07:248682-250139 - strand] [genomic] name=Bfab07g00680.1
GTATCCATCGTCTCCGCACATCTGTTTCCCTATATCAATTGCTAAGGTCGTCTATATCTA
TGTACCCTCCTTGAATCTCATCAAATCCGACTCAATATAACAAGTCACACAACAGATATC
ACGAAAATACAAAAATCAATACACAATGGCGACTCAAGGTCCAATAACCACTCCCCTAAC
CACCCTACTTGGTATCAAGCATCCTATAATCCTCGCCGGTATGGCTCGTACATCCGGTGG
TCCACTGGCAGCTGCAGTCAGTAATGCAGGTGGACTGGGCTGTATAGGAGGATTAGGATA
CACACCTCAACAGTACATCCCCCATGCTTCTTTCATTCATAAACCTCACTAACACACCTC
AGACTCCGCGAAATCATCCACTCCCTCAAATCCAATCTGTCAGACCCCTCTCTCCCCTTT
GGCGTTGATCTCGCTCTCCCTAAAGTCGGCGAAGGCGCTCGCGCTACAAACCACGATTAT
ACGCATGGCCAACTCGATGCGCTTATCGATGTGACAATCGAAGAAGGCGCACGACTTTTC
ATATCCGCTGTGGGAATCCCGCCTCCACACGTCATTAAACGATTGCACGATGCGGGGATT
CTAGTGATGAATATGGTTGGGGCTCCTAAACATACGGTTAAAGCTTTGGATGCGGGGGTC
GATATTGTGTGTGCGCAAGGAGGAGAGGGCGGAGGACACACGGGGGATATACCAAATTCT
ATTTTGATACCGGCGGTGGTGGATGTGGCGAGGAAATATAAACCTGCGATGTTGAAGGGA
GAGACGGCGTTGGTTGTGGCGGCGGGGGGGATTTATAATGGGAGGGGATTGGCGAGTAGT
TTGATGCAGGGCGCGTGTGGGGTGTGGGTGGGAACGAGATTCGTGGCGAGTGATGAGGCG
GGGTGTAGTAGGATTCATAAGGAAGAGGTTGTCAGTGCGAGATTCGAGGATACATTGAGG
ACGTTGGTCGTGTCGGGGAGACCATTGAGAGTGAAGATGAATGATGTGAGATTTCCTTTT
CTTCTTCTTCTTTATTTCTTACTTTCCCTCCTCCCTCCTCCCTCCTCCCTTCTCCTTAAT
CCCCCATCAAGTTACCCATCTCATCACACTAACGCGTCGCCCTCTCTTCTAGTACATACA
ATCCTGGGAATCGCAGCCAGCCAAAATCCAAGAGTTAACTCGCAAAGGCATCACGCCCCT
CGAATACGATATGGAGCAGGGGAAAGATGTCGATATTCCGCATTTGATGGGGGTGGTGGC
GGGCGTGATTGAAGATATTAAACCTGCGCGGGTGATTGTGGATGAGATGGTTGCGGAAGC
GGTGGATATGTTGGGGAAGGCGGATGGGTTTTTGAGTGCGCGGGCGGGGAAGGCGGGGTG
GAGTAAATTGTGAGGGGGTGCGTGGGGTGTGCGGGATGGGGATGGTGGGAGATGAGATGA
GATGTGAGGATTGAGGAT
>d34bca41-8ade-40aa-b356-d43af3a5f48f (mRNA) 1186 residues [Bfab07:250355-251540 - strand] [genomic] name=Bfab07g00690.1
AGGCTAGAGGGCGGGGTATACCTTGTAGCGTGTGCGGAGAATTGAGACTCCTTCCAAACT
AATTCTCTCAAAGCTCTCAATGACGTCCGCATGGGAAAGACCCCGATTATCCAGGTGCGT
GCTTTCCTAGTATGTGAACTATCATTCGCTGGCTGCCGATACTTTCATTGTAATTCACTT
TTGCATATTCCCCCTGTTTTTCCGAGGTCTGTGTGGATAGGTGTTTAAGGCTTCTCAACC
TCATCTCAACTTCTATTCAGCTCTGCCATTCTATTGTTTCGAACTCGAAATTCCCTAAAT
GTCCACTTTCCCAACGATCTACGAGGGGGTACAGAGTGGGACGAGAGAGGAGACGAAAGA
GGAGACTTTGAGATCTGGAGAAGAAAGATTAGAAAGTATGTATACTCATCAACGCTTGGG
ATCGTGATGATGGCTCAACAAATAACTTCTTGTTTACATCTCTTATCCTTCAGATTACTG
ATGTCAAGGTGTTTAATCATAGGAAGACAATCTCACGATCGGGTTGAAATGGCATCCAGA
TCATCCTGCGAATCAGAGGTACCCGGAGAACATTCAGACTCTGCCTTGCCACCTCCATAC
GTGAGATCTCGACTCGCAGGCTACCTCGAAGCTGAACTTCGCTCTTTTCCTGGCGGAGAC
GAAATCACCACCGCAAGCGTCCCTCAATGGACTTGGCCTCGATCGGCATGTCGTCTTTGG
ATTTATCTCATGGTTCTGGAGAAATGCGAACGTGGTGCCATCATCGCCTACGAAACGGCA
TGCAGGTTCAACGGATTTGGCCCGGCGTTGTACATCATGTTCAAGAGCGAGTGGCGTAGC
TTGCTTCATGAAAGTCCGGAGGATAGTATGACGATTTACTATCATTTGCTGGCGTTGAGG
AATGAAAAGGGTGCGGTACCGCCGGCGTTTGAGATTTCACATTCATGTTGAGAGCGGAGA
AGAGGGCATTCGGGTGCAAGGAGGAGAATGTGTAGGAGGATCAACGTGTGCAGCGGAGAA
CGTGCGGGAGGACCAACAGACCGAACAACGCAAACGGAAGGGAATGAATGAGGAGTTCGG
AGGTCACATGGATTTTATGCCATACCTGGCGAGCACTCTCTAATACTCTAGATATACCCA
GCATCAAGATGTGCAGACATTTTGATCAATACTATCTCTTCGCGTT
>c0fa65ee-402e-436f-a69e-ac33469d3014 (mRNA) 1991 residues [Bfab07:252663-254653 - strand] [genomic] name=Bfab07g00700.1
TGGTCTGGTCTGGTGGATTAGTATGGATAGTTACACCAATATGAAGATGAAAGGTTAATA
AATGACAACCACCGAAGCGATAAGCGATAAGAGAATTTCTTTTCCCCAAGTGCCCCTCCA
CCCATCACTACCCCTCCATCCACATCCCAATTATCACCACGAATCTCACCACCCCTCTTC
AATTCGATCTTCAAGTCCTCCCACCATGTCCCCAATCCCCATAACGATTCTTACCGGCTT
CCTCGGCTCAGGGAAAACAACTCTAATCCTCAACCTTCTCCCACAACTGCACGCCCTCAA
CCCCTCCTACCGTCTCGCTCTTCTCAAAAATGAGTTCGGAGATCTCGCTGTCGATTCCCA
GCTTGCTTCTTCATCCTCCATAACTTCCGTGCGGGAAATGCTCAACGGGTGTATATGTTG
CAATCTCGTCGGTTCTCTATCTTCGGCGCTTCAAGAATTGCAGGAGAGTTTCCCAGTCAA
AGTCAACGGATCAACCGGGGAGGAAGAGAAGGGAAGTTTGGATAGAATTATAATTGAAAC
ATCTGGGTCGGCATTCCCTGCTACGTTGGCTATGGAGGTTAATAGGATTGCGAGGGAAAC
AAAGGGGGCTTATGTATTGGATGGTGTGATTTCGGTGATTGATGTCGAGAATTGGAAGGG
ATATGAAGATACGAGTTATACGGCGAGATTACAGGCCAAATATACGGATTTGGTGGTTTT
CAATAAGTGGGAGGGGGTCAGTGAGAGAAGGTTCGATGAATGCTTGGATAGATTAGGGGA
TTTGGAAGTTCAGGTCGCTTGGGTCAAGAGTGATAAGGGGTCAGTGGGGGTAGATGTTGT
ATGTGGAGTTGACGGAGGACTGGCTAGAGGGTTGGTCGATGATGTTGACGGAAAGGAGAA
TGGTCACAGCCATGACCATACAAATGGCGATCATAAACACGAACATTCCCACGACCATCA
ATCCGAAGTCGAAGTCCTATCCATAACCCTCACATCATCTTCTCCATCCTCAACAATATC
TCTCGATCCCCTCAACAAACTCCTCACAAAAGCACCCAAAGATGAAGTATACCGCATCAA
GGCAGTTTTATCCTCAAGCTCTCCCATTCCACCTTCTGATTCTTCACTGTCGCCGCCCGA
ATCTGACATCTCTGCATCCTCATCCTCATCGAACTCTACTTCTGATCTCACACCAAAACC
TGCCAAGTATATTCTCAACTGGGCGTTTGGTCGTTGGACAAGCACAAAAATGGAAGTACA
GCAATTGGAAAAGGAACACGAGAGTAGCCAAGGAGAAGGCGTAGTATTGAGAATGACGAT
TGTGACGGCGAGAGATGAGAGCAATAAGTGGAAAAAGAGGATTGAAGGAGGTGGTTGGGT
GGAGATTGATGGGGGAGAGGGAGAATTGAAGGTGGTGAGAATTTTGTGATGATTGAAAGA
TTGAATAAGGATCTGTAAAAGGCATAGACGGCGTGTGAGAACTGGGGTGCATGATACATA
GATACCATGATGCTGTTACAGAAAGAGATAACCTGCTTTGATATATAGTCATGGATAGAG
AAAAGCGAGAAGGATTGATAAAATGAGTGAGCATTTGATCTGGATGCCGAACTATCAAAT
ACTTGGTTCTGCAAGTGCACGTAATTCCAAACTTGACAGCTCTTGCTTTCAATCCCTCGC
TTTGAAACATTCATATTCCATTTGTTGATTAATTTGTGAATGTCATATCTCTTTTCTAGG
AGTTTTGGGATTCGATCCTGGTCTAGCAGCCATCACGGTCCCGAGCTCTGGTTGAGATAT
GGTAGTCTTTTTTTTTTGCTCTCTCATTTTCCTATTCTGATATACTCTGTCTCATAAAAT
GGCAAATATTCTAGATACTCTTTTTCTTCTTTTTTACGCATTCAGGGTTACGCCGGATAT
ACATGGTAGCGCAAGAAATAAGAACCACTTTTTTCATTGGATATTCATGTTACAATTCAC
TCTCCTTATTA
>448333f1-d1bc-48ea-807a-3ec18520fcda (mRNA) 3052 residues [Bfab07:256809-259860 + strand] [genomic] name=Bfab07g00710.1
CCTGCTTCCCTAGCTATGGCCTCTTTCTTTCGCACTCCCTCCCAAATGCTTCATCGACTG
GCCGGTCATGTTGGAGCCCGTTGCTTTAACTCTTTAATTCTTGGATAGCGAATAGGAATC
ATCCGTGGGGAGATAGAACCGTGTCACTCTGTCCAGTTTCCCCTGCATCCGCATTCTGGG
CTGAGTCTTTTCCACCTTAATCTTCCTTCATACATGAGCTAGCGCATCTTAATATGACTT
CCCGCGTTGGGGTGGGTAGCACTGCATATTGTAAGAGACTACAGGTCAGAGTCATATAAT
ATAAGATTCCATACTTTTCCGTATGATGCTTCTTTTTCTCACCCTCTTTTGAAGCGTCTT
CTCAACACACTTTCGTACTTTTGTACACCACATTCATTTATTCGTTCTCTGCGCACTAGT
CATTCCTTCATTTGCTATTCTGTTGATACAGAATCTTCTATTCCATCAAGCACCAATTGA
GGCCAGTCACTCTTGTGTTTCCCGTTCACTTTTCAACAATCCTTCAGCTTGCAAAGCAGT
CAGTCACCTTACAGATATCAGCACCATCAGACTTGAAGACATTCCAGAGCACATATTCTA
CAATCAAACTCTTCAGTCACACTCACTCCGCCATTATGGTTTTCTCAACATTGGCCCTCG
TGGGCACATTCGCCGCTTCGGCCACTGCATACTCTGCAACTGCAAGAACTTTCGCTGTCA
ACCATTTCTATGGAACGGGACCTCTTCTCACCGCCCGTATAGATCCAATCATCAACCCAG
GAACTGTTGGATCACACGTTCATACGATTCAAGGAGGCAGTGCTTTTGGTATGACTATGG
GGGATACCACTGCTTTGGATGATTCTAACTGCACTTCCTCGCTTGTCAAGAATGACAAGA
GCAACTATTGGACTCCTTCATTGTATTTTGTCGATCCCAAAGATGCATCCAATATTACAG
CCGTACCTATGTTCTACATGAACGTTTACTATTTGTGAGTGACGAATTTCATCCATTTCC
GATAGACATGCTAATATCTCCAAAGCTTTGAGCCCACCACCGACAAGATTACCGCTTTCC
AACCAGGTCATCGAATGGTAGTTGGAAACCCAGCTCTTCGTACGCCTCCAGCAGGAGGCG
GAGCATCTATCGTCGATTATAAGCTCGGAACACCCCAACCAGTCCAAGTTACCTGCCCAC
GTAGCAATTATGATGTTCCATCTTACCCCGCAGACTCAGATGGATTACACGGAGTAGGAA
TCCAGGACCCGCAAAACAAGGGAGCAGGTGTTGGATTTCCAGATCAAGAGTGTGATGGAG
TTGCTTCACCAATGCGTCTCGATGCTCACTTTCCTTCATGTTATAACCCTGCTGCTGGAT
TGAATGATTATAAGACAAACATGGATTGGCCTACAGATGGAAATTGTCCAGAGGGCTGGA
TTCACACTCCTCATATCTTCTATGAGGTTTATTACAATACTCCTCTCTTTGCAGATCAAT
GGGCCCCGGGTCAAGGAAAACAACCTTTTGTTCTTGCTAATGGAGACCCAACTGGCTATT
CATTCCATGCTGACTTTGTAAGTTGTCATCTTCTCGAGCAAAATGTATTCAATGTACTAA
TATATTCATAGATCTCGGGTTGGGATGTAGAAACTCTCCAGCAAATCATCGATAACTGCG
ACGCAGGTGATAGCGGTATGGATAAATGCCCAGGTCTCATTGGTGGGCTCAATGATCCAC
AAACATCCTGCACTATCAAATCACCAATTAATGAGATTGTTTCCGGGTCTATGTCTATCT
TGCCAGGTAGCAATCCACTTGGAAAATGGGGCGCTGGTGTTGCTAGTGTAGCTTCTTCCT
TCGTCGCATCCGCTACTTCTGGTGTTGTTTCTCAAGCTTCTTCAGTAGCTGTCGGTGCTT
CTTCAGCTGTTTCTTCTGCTGTAGCTGGTGCTTCATCAGTTGCTGCTTCCGTATCAAATG
TTGCATCGTCTGTATTAGAGGATGCTACATCTGCAGCAAGTATTTCCATCCCAAGCATCT
CTCTACCTCTCTACCAAGCGACACCTTCAGACTCAGCCCAACATTCCCAAACCCATACCC
GCAACGGTGCGTTCACAAAGGTCGCAGCAGCATCATCAGCCGCTAGCGAGGTCGTATCTT
CTAGGGTCATCACATCCGGAGGTCAAGTAATTACATCCATCGTCACCGTTCAGGCTTCCA
CACTCATCTACAAAACCGTTTCGGTCACAGCAGGTCAAGTTCTTCCTACCGGGTCAAGCG
TCTCTTCCAGCACTCCAGCTGCTATCTCCGGATATTCATATGCTGGTTGTTACGCAGATC
AAGAATCAAATCGCGCGCTTTCCGGCGTCACATTTGCTGATTTGGGAGTGGGTGCTGTTT
CTAGCACAGCTTGCGTGGCTTATTGTGAAGGAAAGGGATATAGTGTTGCGGGAACTGAAT
ATGGAGGACAGTGTTTCTGTGGACAAAATTTACCTAGTCAGACATTGAATGCTAGTGAGT
GTGCCATGGCTTGCGAGGGAGATGCAAATGAGATTTGTGGTGGTTCGTTGGCGTTAAGTG
TTTATTCTAAGAGTGGCGCGAGTAAGAAGGAAAAGAGAAGTTCGAGACATTTGCATAGAC
ATGTGCAGAGGAATTAGACTGGTGTCTAGCGATCGTTATCTCGGTTACATTTGGAATATT
CGGGAAGTGGATGAATCTGCATCTTACAGGTGCTGGAGCTGGGTGGTATGGAGGAAGCAC
AAACAAACATAAACTTCGTTCTCGCAAGTCGAGCCTTTTTTTTCTTTCTTTTTCTTCTTC
TTCTTCTTTGAACAAACTTTAGAGTCATTGGAAGCAATTTGTTAGGATAGATAATTCTTT
TTGGTATCTCGAACAATCAAATCTTCTCAACTCAATGTTTTTTATGGATAGTAGGCTTGG
ATCTGAGATTGAGATTGAGATTTAGTTACGAGATATGAGATATGGATAGTAGTTATGAAA
TCTATGATTTGATGATCTTTTGATTATATTATACGGATACTATAAGTTATGT
>4b8291b1-57d6-414c-aee4-ef9b25a76230 (mRNA) 4889 residues [Bfab07:266265-271153 + strand] [genomic] name=Bfab07g00720.1
AGTGACTGACTTTGATCAAAGTACTTTGCAACGACAACACGAACAACAGCAACACTCGTC
AGATTGTAAATCTTTCTTCTCTGTCTATTTATTTCTTACCTCTCTCTCTCTCCTTACAAA
TCACACTATTCCCGACTCTCTTACACTGCCTTCCTTCGACCGTACTAGGTTCCTCCCACA
CCTGCCTACCGATTCACACGCAATACGCCATACCTACACATCCTTACACAATCATCAATA
TCATATCATACATCTTCCTGCTCCGACATATAAATTCCTTCTCGAAAATACTCTACCAGA
TTGTATCAAGCCGCCTTCCTACTTTCAATTGCAATACCTCAAGAGGAAACGGCTTTTATC
GAATCATTAACTTGAGCTCGGCAGATCTATCTCCAAACAGCCTTTCGTTATCCTAACCTC
GACAATAGCCAGCCAACCAGCCAACCGGGTACCAATAATCGCTCTCCGCCATCGATATCG
TACAACATACGAGCCGCATATCCCTTTCTCCCTTCTGTCTGCTATCTTTCTGCCGTATTC
CTTGGAGAGACCTTGGCCGTTTCCTTCAAGGCTTGCCAATCACTACCGAGGGCGCGCATA
CAAGCAAGCTCAACTTCGCTACTGTTACCTAACATATCTCCATCGTCGTACAACCTCCTC
ATTCTAACCCTTCTAAATACGTACAACTTCAACCATCTCTTCATTTTATCAAAGCGACCA
TAAGTGTGTCGATGCAGAAGATTATTCCATCAAGGATATTGCCTCTTTCGAGTCGTTGAG
CCGAGGGGAGGATCTTTCAAGGAACTGAGAAGGATATTATACCTTCCTGAGTAAACAATC
GCAATCATGGCGTCAACGACGACCTCAACTTCATCCTTGTCGTCAAGGCGGCAAAAGACT
GGCGTGGGATCTTTTACTATCAATGAGCAAATTGGTAAAGGGAGTTTTGCCACGGTTTAT
CGGGGCACACATATGGTATGTCATTGAGTAGATGGCAGCCTTGCCATCTTATCTGCTATT
TTGGATAATTCTTGAGAGCTTTCAGACCTCAAATATCTACAACTTCTGTCCCATATTCTC
GAATACTTCTAATGCTAACGCGTCTTATCACAGCCCAGTGGAAATCTCGTGGCGATAAAG
TCGGTAAACCTATCCAGACTGAATAAGAAACTCAAAGACAACTTATATGTCGAAATCGAA
ATATTGAAAAGCCTTTACCATCCTCATATCGTTGCCCTCATTGATTGCAGAGAATCTGCC
TCGCACATACATCTGATGATGGAATATTGTGAACTGGGGGACTTGTCATATTTCATTAAG
AAGAGGGATAGATTGGCCGATAATCCTACACTTTATGATATGGTTCAGAAATATCCTATG
CCAGTCGAAGGCGGACTCAACCAAGTTGTAGTTCGTCACTTTTTCAAACAACTATCCAGT
GCCATGGAATTCTTAAGAGAGCGGGACTTCGTACACAGGGATGTTAAACCACAGAATTTA
CTTTTGATACCATCACCGGAATGGATAGCAAAGAGGGCGAAAGGTGGACCAGAAGCCATG
AAGGCGAGCAAGGAATCCGTTGTGGCTATGGTTGGAATTAATTCATTACCGATGCTTAAA
TTGGCAGATTTTGGATTTGCTCGATCCTTACCATCTACTTCGCTTGCAGAGACTTTGTGC
GGTTCACCCCTTTACATGGCACCCGAAATTTTACGTTACGAGAAGTATGATGCACGAGCT
GATCTCTGGTCTATTGGAACGGTTCTTTATGAAATGATGACCGGAAGACCTCCTTTCAAA
GCAATAAATCACGTTCAATTGTTACAAAAGATTGAAAAAAATCAAGATGAAATTAGATTC
CCTAGTAGGGGTATCTACAGCAGAGATTTGAAAGATATTGTGCGACGTCTCCTCAAAAAG
AAACCGGAAGATCGAATAACCTTTCCAGAATACTTTGCTCACCCCGTCGTGACCGAACCA
ATTCCTGGCCTGGTTGGGGATGATCGACCAAAGGAAAAATCTCCGGAAACTTCAATTGTT
CGCCAGCCATCTTTGAGAGATCGTCAACGTGAAAGTCCAACTGTCAAGCATATTGACACG
GCATATGAATCATTGATTACTAGAGACATTGGGGAGCAATCTCCAAGAACTCCTAATATA
GAATCTAATCAACCTTTTGGAACACCAGGTCGTAGCTCGGGTCGTCCTGACTCCAGAGAT
CGACCTTCTCCAGTTTCTGCTGCAACTGCTCCAAATGTGGATACCTTGCCACGACAAAGA
GATCGCAAGGATCGCACGGAACCAAATTATGCTCCTATTGTAAGAACTGGGTCCACGAAA
CAACGTTACGATGAGCAAGCGAATTTGCAACCCAAAAATGAAGTTCAATCGAGTAATTCC
ATAACTGAAGCCGAGCAAGATGTTCGCGATGCTAGAGAATATGTTCTCGTTGAGAAGAAA
GCTGTTGAAGTAAATGCTTTTGCTGATGAGATGGCTGCAAACCCACGACTTGGACGTGCT
AATTCAGCACCTAAACAATTGCCCAGAAGACATACATCAATGGGAGAACCAAATTCGACA
ACAGGAGCTGTAGCTGTACCACCTTCACGTATAGTTCAAAGAGCGTCAGGAAGAGCCCAG
CCTGATACATCGTCCGCCAGAAATTCATATGGTTCTTATGGTAAAACTGGTAGTAGTCCA
TCAACTGCTTCAGCTATAGCTAAAGCACTCCAAGGCGCGAGCGTCAGGGTATTTGGAGTT
TCTTGGTCACCAACCCTCATTGGAAAAGGTCCATCTCCACCACAATTATACAATCCTTAT
CCCGCTTATCCTACACCTAATGCTGGGTTGATTGGAGATGGTCGACCTATTGATGAGGAC
CAAAGAGTTGTTAATATCATTGAGGATTCTGCAACTCGAAGTGATGTTGTTTATGGATTT
GCTGAAGTCAAATATCGACAGCTTATTCCTTTAGCACCTTCTATGAATCATGGCCTAGGA
GGTCCAAATCCAGAAAGAACAGGTGATGCTATGGATGAAGATGATGGTCTAACCGTGGAG
GCTATTGTCAACTTATCCGAAGAAGCACTTGTGTTATATGTCAAGTCATTATCACTTCTT
TCAAAATCTATGGATATTGCAGGAGCTTGGTGGTCACGAAAGCAACGTGGTGGAATTGTC
AGTGGAGGTCACACTCCAGGAAGTGATTCATCTTCAGCAGCTCAAGCAGGAAACCGTATT
AACGGTGCAGTTCAGTGGGTTCGCACTCGATTCAATGAAGTTTTAGAGAAAGCAGAACTT
GTTCGACTCAAATTGGTCGAGGCTCAAAAAAGACTCCCCGAGGATCATCCAGGACACCCG
AACAATCGTTCAACAGCCTCAAGATTGGTTGGTGGATCTTCAACTACTGATGGTGTTGTA
TTGAGCTCCGGTATAACCGCTGAAAAGCTGATGTATGATCGTGCTCTAGAGATGAGTCGT
ACAGCAGCTATCAATGAGTTGGCAAATGAAGATCTCCCTGGTTGTGAAATTTCATATACC
ACTGCCATTAGAATGCTTGAAGCAGTTCTCGAAAATGATGAAGAACTTATTCCTCGAAAG
AGATCATCAAGTTTACGGGAAGATAAGGAGAAATCTGAAGGGGGAGAAGTTAATGGTATC
AATTTTGGTGATAGAAAGGATGTCTTGAAAGGTAACTATGATTCTTGGTTTTGTGAAAGC
TTACATTTGTGAATGAAATGCTAATTCGAAATTAGTACTGCAAATGATTCGTACTCGTCT
TCAAGTCCTCAAGAAGAAGATGACAGCTATTGCTAAACATCAATCAATGCCACCTCCATC
ATCATCTCCACGTCGAAGCTATAGTGGAGGAACCACTCCTACCATCAATAATACTCCACC
GAAATGAACAATATCCAGATAAGCAAGAAAGCTGGTCTTTCGATTAGTCAAATGCATTAT
GATAACATGGAAGTAAGCGCAAATGCATAGTTCGGGCGTCATTCGAGTTTAGCAACTTTC
CATCTCTTTTCTCATTCATTTTATGCTGAATTTTTTCTATGATTTTTTAGAAATCTCTGG
ATTTTTTTTTTGATTTTTTAATGTGGATTTGGTTGTTCTTTCCTCTCTTCTTCTTCTTCT
CTTGGGCTGGAGTACCTGGACTTGTGCTTTACATGGAGATTTCATTTGAGAGCAGGTGCA
TACGACATTCACTCCGTATCACAACCTACTGATGATTATGATTGAGGGTCGGAATGGTTA
AGATTGGCGTTTTTTACTTGATACTATTATTTTCAGAGATTGAGAGCTTGTGAATACACA
AACCTCCCAGGCTTTTTCTTCTTCTTTTTTTTTTTTTCTTTTTGCAATATTCAATGGGGT
TAGGATGGGAAGGAGGATGGATGGATTGATGGTGTTTGATAGAAACAGACACGCACACGC
AAATGAATGGATGGATTGAATCAGGCACTCCCTCTCCTCTCTTATGGGCGTATTACATCC
AGATATTCATTCGGATTTGGTGTTTGGGTGGGATTTGATTTTACTTATGGGCTTTTTGCG
TTGAATTTTGGTTGTGTCTAGGAGGACGGTGAGATGTGCATGCGTGCATGAATTGCATTG
AATTGCATCATAGTATTTCAGAAGATACCATCATATCATATCATGACATGCAGAAATGGA
GGTTGTGGATATCAAACGAGGAAGTTGGTCAACTAGCAAGTGAGTAAGCAGTTCAAGAAT
GATTAGGATTTAAGGAATCAGGATTTCGGGGATTGGGACAGGATAGGATAGGAATGGGAT
GGGATGGGATGGAATCGAATCGAATAGGATAGTTAGTATATGGTAGGATAGGATAGTATG
TTAAAGATATATTATATTAATCACAATAT
>b85a8108-053b-47cd-ab3a-8042b28823e7 (mRNA) 2870 residues [Bfab07:271599-274468 - strand] [genomic] name=Bfab07g00730.1
TTGTTCATTGATACTTTTGATATCAAGGTTTTACATACATTTTATTAATAAAGCGAGCAT
TATACTAAATTATACTCAAAATACAAAGTAAGTAAATATATTGTACTAAACAGGCTATTT
CTTTGGCGTACTTTATTAGAGTACAAGCAAGCAAACTTCCCTTTCAAACATTCATCCCAC
TTCCTCCTACAAATAACATATACAACAACTGCAACAACTACAACACCACATCCTCCAATT
CCTTACAGTTGCACATCAAAATACTATTTCCTTTCCCAATTTCAATTTCTAACACAGTCT
CTGAATAACAGCAACAATTCACAAACCACACCCGCAAAAACATCTATCACAAATCACATC
CCTATCAACCATGGCTCCCCACGCAGACACCCTGTCCACCAACGGTGACGGTAGCACACT
CAAAGCCACCGCCCCCACCTTCTCCCCCGTAACCAGCATCCCCGAGTCCAAATACCATTC
CACCTCTACCGCCTCCGCCATCCACGACGAGCACGCCTACGCAGCCCACAACTACCATCC
CCTCCCCATCGTCTTTGCACGCGCCTCAGGATCCTCCGTCTGGGACCCCGAAGGAAACCA
CTACATCGATTGTCTCTCTGCCTACTCCGCCGTAAACCAAGGCCATTGTCATCCAGAGCT
CGTGGCAGCTCTGTGTGCGCAAGCCCAACGTCTAACGCTTTCCTCAAGAGCATTCCATAA
TGATGTCTTCCCTAAATGGGCTGAGAAGATTAAACAAGTGTTTGGATATGATATGGTTTT
GCCCATGAATACAGGAGCAGAGGCTGTGGAGACCGCGATCAAGATTGCGAGAAAGTGGGC
GTATAAGGTTAAGGGCGTTGAGCAGGATAAGGCGCTCATTTTTGCAGCGGCGGAAAACTT
TCACGGAAGAACGGTATGTTGCAATTACCTTTTCTCATCCTTTTATACATCTCTAGTCTG
CCTCCACGGCAGTGGCCCCCGGAGGGCCAGCGGAGCGTCATCTTCAATTGATTGAATCTT
CTTGAAGGGGGCAAGCCCCCAAACCCCCATAGCTCGCTGCGCTCGAATTCCTTTTATCGT
ATGATACTAACTTGTTATTTCCATTATAGATGACCGCAATCTCCATGTCTGTCGATCCTG
AATCTCGCGATAACTATGGTCCATATGTTCCAGGTGTCGGTGCTGCATGCCCAACCACCA
AGAGACAAATTAGATTCAACAATGTATCTGATCTCGAAATTGTCCTCGAAGCCCACGGAA
AGAACACTGCTGCCTTTATTGTCGAACCAATTCAAGGTGAAGCCGGTGTTGTTGTCCCAG
ATGATGATTATCTTGCAAAGGTTCATGCTCTTTGCAAGAAACATAATGTCCTCTTGATCT
GTGATGAAATCCAAACCGGTATCGGTAGAACTGGACGTATGCTTTGCTCAGAATGGTCTG
GTATTAAACCAGATATGGTTACCCTCGGAAAGGCCATCTCTGGTGGAATGTACCCAGTCT
CTTGTGTTTTGAGTTCAAAGGAGATTATGCTTACTGTTGAACCCGGTACTCACGGTTCTA
CATATGGAGGTAACCCATTGGGTTGTGCAGTTTCTATTCGTGCTTTGGAAATCATGGAAG
AAGAAAAATTGACTGAGAGAGCTGAAAAGTTGGGTCATGTCTTGAGAAAGGGATTGGAAG
ACATGAACAGTCCTATGATTAAGTTGGTTAGAGGAAAGGGCTTGTTGAACGCTATTGTCA
TTGATGAGACAAAGACTGGTGGTCACAGTGCATGGGATTTGTGTATGTTGATGAAGAGCA
AGGGATTACTTGTAAGTTTTTTCTATTTTATGATCGAAAACTGTTTGAGATGAATATTGC
TAACAATTCATAGGCCAAACCAACCCACGAGAACATCATTCGTCTTGCACCACCTCTTGT
TATCAGCGAGGAAGACATTCAAAAGGCTCTCGCCATCATCAAGGAATCTATCGCCGAATT
ACCAAACCTCAAGGGTGAGAAAGAAGATGACGTTATTCCTGCAGGCGAGAAGAATGTCCA
CATCCCATTGGAAAATTAAGAAAACTCCAATTCTCATTCAACACACGCATTTTTTTTATA
AGAGAGGTTTCATTTTGTTTTTCAGAGAAGGGGTTCAAAAAGAATTTGGGTATCTACTGT
TTTTACTTTTTCTTTTCTCATTACAAAGATGTTTTACGATCTAAACTGGCATCGGCGAAC
GGGAGGGGAAAATGATACATAAACATGACGTTTTGCGAGACTCTTCTTTCACGAGTCGCA
ATTATACCAGGAGTTTTTTGAGGGTATCTACTGTTTTTGGGCGACCAGAACATGACGTTT
TGCTTGACTTTAAGTCGCAATTATACCTAAAGGCATTGGGAAGAAGGAGTTTTGATTTTT
GGGGTATCTACTGTTTTTTGGCAATCCGCTTGACGATTGGGCATTGAGGTTCTTTGATGC
AATGCAATGCAAATCGGGAAAAAGGATTGAGTGAAAAACATGACGGTTTGCTTGACGTTA
CGGAACTATAAAGTTGAAGTCGCAATTATACCTAAAAGGCAATGGCATTTGGGAGGGAAT
TTTTCTGTTGGTGGTATCTACTGTTTCTTGATCTATTTACCTACTTTACTTTGGACGATG
AAGAAGAATGGGATGAATGGATAGAAACATGACGTTTTTGCTGGATACAACGCACCTTGT
GATTCTTGTGGTGAGGTGGGTTGTGAGCAAGTGTACCTACCTGGATGAAGGAGATGTTTG
GAAAAGGAGGAGGTTGCATATATAGTATTAGGATAGGATAGGATAGGATAGTATGACATA
GCATAGCATAGCATAGCATAGTATATCATATCTTGTTTTATCTTATTACA
>dcf2ddd9-d361-4431-9e08-d300564576cf (mRNA) 2920 residues [Bfab07:275591-278510 + strand] [genomic] name=Bfab07g00740.1
TCTCCAATTGTACATAGTATATATATATACATTCTTTCCCTCTCCCCTCTCTCCCCCCCG
TCTCATTCAATCCTCATGAACAATCCATCGTCATGTCAAATTCAATCCCGACCTCTAACA
AAGAGGTAAAATCTTCTTCACCACCTACAATACCTTCACCTCCCCCCCATCACCTCAACC
ACAACCTCCCAAATCCAGATATTCAAGAAAATGGTCTCCACGCTCTCGTAAATATCCAAA
CCGCAAAAGATATCTGGACTTTCCTTCTAGTATTTAGAGTCTTTAATTCTTTTCTCGTCA
AAACTTTCTTTCAGCCAGATGAATATTTTCAAGCTCTAGAACCGGCTTGGGAAATGGCTT
TTGGAGAGGGGAGTGGTGCTTGGATTACTTGGGTATGTGATCTTTTCAATTCATCCTGTT
TTTTTTTGTTTTTTTTCTTTGCGTCTTGTGGGCAAGGGAAGTGTGGACTGTTTATAAGAT
ACGAAGAGGGGAAAGAAATATAGATAACATGGTCGTAATGTTACCGGTGAAAGGGGGAGG
GGGAATAAATTGGGAAAAGTTTCCCTCTTGTTATTTTCTCATACCTCACTTCCAAATATT
CGGCCTCCACGGCAGTGCCCCCCCGGGAGGGCCAGCGGAGCGTCATATATAAATGTTTCT
TCATCTCATCTCGTCTCACTTCATGCCAGTTGAAACCAATTGACTATTTTCTTTTATGGG
GGCAAGCCCCCAAACCCCCATAGCTCGCTGCGCTCGAATAATTGATACTAATCAGGTCAA
ATAGGAATGGCATTATCAATTAAGATCTTCATTACATCCGACTCTTTTTGCTGCTGCATA
TTACTTAATAGATAAACCTATGGAATTTGTGAATTTCTTTCCTCAATTTAGAGCTGAAGT
TTTAGCTGTATTGCCAAATATCATTCAGGCTATTTTTGCCGCATGTTGTGATTACTATAC
TTGGAAAATGGCAGAGAAAATGTATGGATTGGGTAGTAGAACTGGTTATGTTACTGTATG
TTTATATCTTGAATCTCTAGAAGAATTGAAAACTAATTTTGGTCAGCTTCTCATGAGTGT
ATTAAGTCCTTGGAATTGGTTTTGTTCAACAAGAACCTTTTCAAATTCTTTGGAAACTAG
TTTAACAATTACTGCATTATATTTTTGGCCTTGGGACATGGCAATTAGTTCTGGAGAGAA
AATTAAAGAGGGAAGGAAGGAGATGTCGACTACGTCTATATCTAAAGGTGTTTTCAGAAC
GACAGAAACCGTAAACCAGTAAGATTTCTAGAATTATGTATTCGAAACTCATCATCTAAT
TGTAACAGTCTTCGATATTCCCTTCTTCTTGCAGGTGTTGCCTGTATTCTTAGACCAACC
AATCTTTTGATATGGTTTTGTGTCATAATGCCAGTCATTATGTCCCTCATACCCGGAGTA
TCTCCAAAAACAACTAAACCACCTATCCCACAAGATTACATTATTCTTCTCAGAGAAGCT
ATCTTATGTGGTTCGATCATCCTCATCATCTCAGCTATTTCCGATCGTCTCTACTTTGGA
GAATGGACATTCCCACCTTACCAATGGCTTCATTTCAATATCTCTCAAAATTTGGCCGTA
TTTTATGGCAAAAATGATTGGCATTATTTCTTTTCCCAAGGCTTGCCACTTTTGTTACTC
ACTTACCTGCCATTCACGATTCTCTCGACATTCAAAGGCTATACACCATCTACAATGCCA
AATCCGGAATTCACTTACAACCTCCAAATAATTCTAACACATCTCACTGGTGTGATGATC
TTCGTCTTAAGCACAATCTCCCATAAAGAAGTTCGATTCATTTACCCACTTCTTCCTATT
CTTCTCCTCCTAACCGCACCATCAATCACATCATTTTTCACACGCGAAACTCAAATCCCT
ACAAACGACTCTTCCAAATCGAAAATCGAAACCGCAACAATCCGCAAACCACTTCTCACC
ATTCTCATTCTCCTCAATATAGCCTTGGCAGCTTATACAACAATCATCCATCAATCCGCC
GTGATATCCGTAACTACATTTATCCGCCACAAATACGAAACAGAAATGTTGGATGCGCAA
GGAATCCCTCTTCATTCTCCAGACGCATACACATATCTAAAACATTACCCCGCTTCATTC
GATGAGCACGCGCCCCCTTCGCTAAATATCGACTATGATATTAAGAAAGAAGAAAATTCT
CAATATGCAAAAAAGATGATGGGGACTTCCCAAAACCCGGATTGGGATGGGGAAAATGGG
GAAGGTGCGATACCCTTTGTGGGATTTCTAATGCCCTGTCATAGTACCCCGTGGAGAAGC
CAATTGGTGTATAAGGGATTGGGGGCCTGGGCTTTAGGATGTGAACCTCCTGTACATTTG
GAGATGGGGCAGAGGGATATGTATAGAGATGAGGCGGATAGGTTTTATGATGATCCGCGT
AGGTTTTTGAGGGAGGAGATTTTGATAGAGGGGGATGGGGATGGGGAGGGTGATGGAGAT
GGAGATGGGAAGAAAATGTGGCCCCGCTATCTGGTGGGATTTGAAGGGGTTGAGAAGGAT
GTGAGGGAATTTTATGAGGGGCTTGTGGAAGGAGCACAGGATGGAGCGGGTAGAGGAAAG
AAAATGAAAGAGATTTGGAGGGAGAGAAATACCCAGTGGATTGATGATTGGAGGAAGAGT
GGCGATGTAGTGGTTTGGGAATTTGTATAGGGGTATGGGATGAGATGAGCTGTGAGATTA
GGCGAAGAAGACAGTGGATGAAAGAAGAATGGATAGTGAAAATGTATACATAGTAGATAA
AAAGAATTGAAAGGATAAAATTAATATTGTACGTAGCGCATTTATTCATTTCTCTTGCTC
TTCTTAAGCCTCATCTTAAAGAAAGAAAGAAAGAAGGAAC
>6d638fd5-7107-4237-b229-ebd3869166de (mRNA) 3731 residues [Bfab07:279298-283028 - strand] [genomic] name=Bfab07g00750.1
TTTCATGCCACGGATTAGTTTGATACATTCTACTTCAATCTTCAATCTTCAATCTTCAAC
CATCATTGTCATTGTCATTTCTATTTTTCACCCAGTTTTATTTCCAAACCAAACTTTGAG
AGTAGATGGTAATTGAGGTCTGGTTCGCAAGGCAGTGATGAATTAATGGGACTTGGATTG
AGATTCGAAGGGAGGGATAATATTAATGGAGGAAGGGTTAGATTTGAATTTGGGTCTGCA
GACTGCGATACGGGAAGACTCGGGATCCAGGATACAGTTGCAGATGCAAATGCAGCAGAT
ACCATCGACTATGCAGCAATCGCAATCGCACACCCAACAATCGCATGCGCAGAAGTTGAG
GGAGGAAGTTGCACGAAGAGGGGAGACGAGAGATACATTAACGGGAGAGAAGGCCCCGAG
ATTGGAAAGAAGTCCACATCCATATCATAAACGACATGAGGAGATTCCGTTTGGGAGCGA
AAGAAGTGAGAGGAATCCGGTTATTAGGAATTCGAAAGGAGAAGAATGGACTTCCCGAGT
GCCTGCCAGGAAACCTTCTTCCTTAAATCCCTCTTTCAATCTGAGGCCTTCTAACTCCCA
AACGAGAACATCTTCTTCGGGAGCTCCTGCGTCGCCGTCACCTCTACGTTCGGCACAAAA
TACCGACGATGAATTATATAATGGCGTTAGAGTAACGATTGATGGATCATCAAATGGGTA
TATCGAATCTACGAACAGCGATAGCGGGACTGAGGCAGATGATGAACATTTTCTCAAAGG
CCGGCCTGCTCCGAGGACGAAACCACACAAAGGATTGAGGGGTGTAGATGGTAGTATGTC
AAATACGCCCAGTCCATTGTTGAGTCCGGCTATTTTGGATGATGAGATACGATGGAAGGA
AAGTGGGAGGATTAGGTCTACAATCCCGACTTCGAAGATAGTTACGAAGGAGGAACAGAG
AAAATTAATCGAGAAGTTTAAACAGAGGAGGAAGATTGAAATTGTCAGGAGAACAACTGA
GGCGTGTTTATTATGTTTTGTGGGAGGTATTATATATCAGAGTCAAGGAGCTAAGGAAAT
ACTCTATCTGTGGAAGAATGGTATGCTTTTATCTCCAGACTTTCAGAAATCATGCTGACT
GTGAAGAACTTGGATGTCAAATTCTTATTATAAGTGGTTTGATAGCTTTATATCCACTTC
GACTTTTACGACATCTAAGCTCACGAACACCATGGAAATCTCCATTCCCTCTTACTATAC
CTGCAACATTCGATCCTGCTCCTTTATTATATCCTCCTACGATAACAATGCTTGTTTCGA
TTTTACTTTCAGTCAGTGATCCTAGTGGTCTTTTACCAAGTATGATACTCGCGATATCAA
CATTACCGAAAAAATTAATCCCTGCTATTGGAGGTCTTGAAGGAAGAGATATGTTACATT
GGGTATTGGCATGTATGCCATTATTCACGACGACATTAACCAGAGCTCCATTCTTGAGTA
AAGAGTCATTGCCTCTGAATCCAGAAGTATTGGTTTTAATACCACCACTTCATCAAGCTT
TATGTAAAACACTTTATTACCTCACAACTACTAGTCTCCTGGCAGCTGAACTACAATTAC
TATCAACCGCGCTTATAAGCTTATTACTCAGAGCATCATCTCCGCAAGCAGTTATTCTAA
AAGCACTTCTTTGGGGTGGTGGTATAGGAATTCTAGTTACTTGTACACATGTTCTTAGAT
GGGGTGTTACATTAGCTCGAGTCCCTACATGGAGATTTAGAAGACCGGATCCTAAAAACT
CGGGGTTCAGATTCAGCAAGAGATCTTTATCATTTGGTACAAATACGTTAAGTGTATTTG
CCAAAGATAGATTCATCAGTGATACGAGTGATGACGAACTTCATAGCCGTTATTCACAAG
AAAGGGGTGGGAAACTACATTCTTCCGAATTTTCTCCTTTAGATGGAGAGTATTCGGGTA
TCTCGAGGAGAAATAATTTACCGGGATCTAGTCCCTCCAAATTAAAAACTAGAACACCTT
CTGGTCGGAAGAAAAGATCGGCATCTATCAGTCTTCAATCATTTTCCAGATTAACTTATA
GACAGGCTACATTCCGGAAATGGGGATATGCTATTTATGTATATATCTGTATTCTCGTTA
TTGTCCTGCTTGGTATCAGAGAATACGTAGGGAAAGAAGCATTGCAAGGTTATGAACCCG
TGGGTTGGGCTCTTGGGTATATGTTTGGAGATTTGCCACGATTTAGACTCGAGGTCGTGA
AGGCGAATTTGCAGAGATGGATTCCGTTACCTTCTCGTTCCCATTCTTCCGATGATCTAG
AGTTACACGAACGAACAAAGATTTGTTTAAAAAGAGGATGGGTAGAACGCATTCGTACCC
AAGATTTCGGCGCGGCAAATACGCGGTTGATACTCTTGGGCTACTGGCTCCTCATTATCA
TTACGGGTCTAGCGATTGTTTTCCGTCTTTCGAAAATATATGAAGTGGATACGAGAAGAA
AAGTTTTTCATTTCATGATGGTTTTTATTCTCTTGCCATCGACATTTGTGGATCCGAATT
ATTGTGCGTTGGCTATGGCATTGGTGTTGGGTGTGTTTTTACTACTGGATTTACTGAGAG
CGAGTCAGTTACCGCCGATTAGTAGGGCGTTGGCGAAATTTTTAATGCCGTATGTCGATG
GAAGGGATTTGAAGGGACCGGTGGTTGTTAGTCATATTTTTCTTGGGGTGGGATGTGCGG
TGCCTTTGTGGTTGAGTTTGGGGAGCTTGCCGTCTTATTCTTCTTCTTCAATGGAATTGC
TTGATTTTGTCTCGGGATCTGAAATCGCTTCTTCGAAGTTTTTGTCGTCTTCGTCTTTTG
AAGGAGGAGCAGAAGGAGAAGCGATGGATCCGTGGAAGGGATGGGAAATTCCACAGAGAC
AGAGAGAAATTGCTATGGTGGCAGGAGTTATATGTGTGGGATTAGGTGACGCAGCGGCGA
GTTTGGTAGGAAGAAGGTGCGGGAAGAGAAAATGGTATTGGGGAGGGGGAAAGAGTTTAG
AGGGGAGTATGGCGTTTATGGTTGTGGTTGCTGTGGCGTTGGTGGGGGCGAAGGGGTGGG
TTAGGGGAGGTGGATGGGAGAGAGAGGGGAGCGATGCATGGAGTGTTACGGTGGGAAAAA
GTATTGTTGCGGCGGGGGTGGCGAGTCTAACGGAGGCGGTTCTGACCGGGGGGAATGATA
ATGTGGTTGTGCCGGTGGTGCTTTGGTGTTGTGTTAAGGGGTTGGGAATTTAGGATGAAG
TGGGGATTTTGGGATGGGATTTGGTGGATTTGGGGATGTGATGGGGATGGGGATGCTTGG
AGAGATTAACAAGTATTTGGTTTGAAGAGATGAGAGGAAGAATGAGGATAGAAAAAAATG
TTTCTTAGGGTCTGGGATTTGGGATTTGGAATTTGGAATGGTAATTTGGGAATAGGGATT
TTAAGATTTGGGGATAGAAGAGTATGCGTGAGAGAGATAAGTGGATAGATGAATGCATAA
AGAATAGAGGATATCAGGGGGGGGATCGGGTTGAAAGCGTATAGGGTAGAGCGGTAGAAG
AGTAGGAGAATATTAATATGAAGCATATGTATGGTATATGTTAGGTGATATGAGATGAGA
TGATATAATATCAATGAACTGATCGGGTGATATTAGATGTACAGATGAAGAAGCAGAGTG
AAAGGGAAGAG
>1661f23e-42b5-47e9-a93c-53be70957ca6 (mRNA) 5501 residues [Bfab07:283345-288845 - strand] [genomic] name=Bfab07g00760.1
TCTGTACAGAGAGACAACTCATCTTCCGAAGCTTTGGATCTTGGGAGTCCTTCTCTAAGT
TGACGCTTTAAACCTTGGTTACGAAACAATACAACACTACACTGCACAACACAACATCAG
AATCATCACCATAACCGATTCTTAGGATATACACATACAGATCCACATCCGCATACACAC
ACAGATACACACACACACACACACATACATACATACATACATACATACATACATACATAC
ATACATACACATCTTCATCCCCTTAGCCGCCAGTTGTGAAAACTAACCGCCCACCTCATG
CTACAGTATACTACTACCCAAATCGTACACAACCAAGGAAGGGCAAACACATCTACTATA
ATTAGTCAAAGGGTAGCTTTTCCGTCGATTAATTAAAACCTTGTTAAGCAACTTAAAGCA
AAGACAGCAAAGACGATTGCACGACTCGTTTGAAAACGGGGAATCAAATCCTTTCTCTTC
TGTTCCCTCCTCTTTTTCTCTCTCTTTCAACTCGACATTCGATCCGAATCCATGCATTAA
TCTTTCTTGAGGTTATCATCATTTGCCTTTGGTTTATCCTCCCAACGACATTGATTACCA
TAGTCCGGCCTTGGACTTTCGCAAAACACAGACTTGTGCATCGATGAGTTGCGTTGCCTG
TACAGTCTATCAGTCCACCAGTCTGTCTGTCCGTCCGTCCGTCCGTCTGTCCGTCAGTCA
GTCAGTCAGTCAGTCCATCAGTCCATCAGTCAGTCAATCCATCCCTCAGTCAGTCAGTTG
AACATTTTCGAAAAGTGGCGGCACCACCGAGGCTGAGGATCGGAGGATCGGTCAAGAAAG
GAAAGGGAAAAAAAGGTTTCGGGCTAAAATCACTGGGCAGCCAAAAATTGAACAACTACG
ACCACAACCAATTTTAGCTCCAGACTCTCGATACGGTGGTCCTTAAAGAATCTCATCTCA
CAATCCCCCCAATTCCAATTCCTCCCACCTCTTCAAATAATTCGAGAAATCATACAACAA
CATCATCCACAATCCACCACGACAACCACACATCGGCGAGAAAAGCCTTCCCTTTCCAAT
AATTATACCTGTCGCCACCAAGCTTCATTTGATTTCCAGCAAATATAATCACCCGTGGCA
GAAATTATTGTATGGATTCGCCGATTCTGTGGATGAACATTACACATTGTCATTGATTCC
GGGTGGGGACAAAGCGATTCGACATCCTCAACACCATCGATTGAATTTCGCCCATCCCTC
CTTCACGACCCATCTGTTGATACGAGGCATAGCATACACTCAATCATAATATGAGTGCTC
CTCCTATATCGTCTCTCGCATCGGGCGATACGGGTGTCGATCTCGAAGCTGCATTCAAAG
AGTCGCTCGGTATCGCTCGAGACGTTGTCAAGGGAGTGTTATTAAAGTCTCTTCGTGTGT
CATTCGAAGGTCACAATATTAGTTTCCCAGCTCAGCAAATACTTTCTGGTGATGAGACAT
ATAATACTCTTCTTGCCCTGCGAGATTCAGATTCACCCGCAGGCATGATGATAGACAGTG
ATGTTATTCAGCTTCCATATTCCGGAAATACCATCAGTTCAACTTCTCAATCGTCTGCGA
TGGGCGGTCAAATGAATCAAATGTCCTTCTCACCCTTGACTACGAGCAATCTCAACTCTC
ACACTCGTCCTGGAAATCCATTACAGCAACAACCATTCAATAATTCCAATCATCGACAAC
AATCTTCTTTTAATGCCACCCAAAGTCAAACCGAACTTCCACAACTTTCCAATTTATTAC
GAACAGTGAACACAAACAACTACACTCAACAACAAACTTACCCCTCCAACAATAACTCGT
ATTCACTCTCTTCGAACCAACCTCTACGCCCTCAACTGCAACAACACATCTCTGCCACTA
AATACCCCCAAAATATGGACGACCTTTTCTCCCGATCCGATTCAGTCCTGGCCTCGCAAA
TTCCCGCAAATCGAAGCAACTATCAACAGCAGATGATTGCTCGATTGCAGAAAGATTCTC
GAACTTTAGCAAATCAATCCTATTCAAGCTACGGTGGACAGGGCCCAATTCCTAATCTAG
AAAGATCGAGTTCGAGCAATTCAGTTTTGTCCAGTTCATCTTTACCAACTTTGGCTCCTG
CGCAAAAACTTCCACAAACCGAAAATCTACTTGTTGTAGAATCTCGATCGAGTACGCAAA
GTCGGTCAGAAACGCCCATGGACTTGGAAATGACTAAAGCTACCAACATGAGGAAGCGCA
AGATACAAACAGACGAGCAGAAGGCCGCCGCGAAGAAGGCAAGGCTATTGAAGGTTTCTG
GAAAGGCCGAAAATGCTGAAAAGATAAATAAATTGGAGGTAGTAAGTGTGCCCACTCACG
TATACATCTGGCAATAAATCTAACTGTTGTGTAAAGGCAAAGAAGAAGGAACTTACAATA
CCAGCCGACGTTGTCATCCGCATTCTCGAATTTTGCCCTCCTATATTTCTCCGAAAAGCT
CGTACTATCTGTCACAGCTGGAACAAGTGGGTCAATGGGTTGCAATCTATCCATATAAAT
TGCCGCAGAGAAAACTATGGTTACAACTTGCCTGATGAGATTCCAGGTCTATCGGCAATG
CAATATGTTGATCTTCTGGGAGGAAAAGGTTGCATGGAACCTGGTTGTAAGAACAAAGAT
GCAAGCAGAACACACTGGGCTTGGAAAAAGAGGTGGTGTCTCAACTGTTGGAAGGGAAAG
ATTGAGAGAGAAGATCGCATCCAGAAACATCGCCAGCTCAAGTATTCCCTCCCTGTCATT
GACAAACTGCTGGCATGCATTCCAGTCAGCATGTACGACTCTTTTGGTAAACCTCATGAT
TACGTCGAAGAAGGAGACCCTGGAGCAATTCAAACGTCAACGCACAGACTATACAAATAC
TACTTGATTGCCGACGTCGAAAACATCATAAAGGAATATGAAGCACTCACACCCGATCCA
TATCGTGAGGATCCTACACATAACGATGCGCAGAAAGCCACCGCCCGCCAGATTTGGGAG
GAGAAGATGGAAAAGTTAGAAGAAGATCGTGATGCCTTCTTCGAAGCGAAAAAGGCTAAG
AACGCAAAGGTCATGCAACTCGTTTTACAAGTCGAAGCAGCAGTCCGTGAGAAGAGGGCA
AAAGGTCGCAAGCCGAATGATGCTAATCGCGAAAGCCGGAGAATCCTCTTCTCCACACTT
GCGAAGCGTGACCTTCCAGATATTCCAGAGGACTTTATCGCCAACAGCAAGCCATTCAAA
GCAGCCGTTCGAATCTTCAGAGATGGTGGCTCAGAACGAGGTTGGAGAGCTTTGAAGCCG
AAGATTCAAGCAGTCTACCAGCAGGAGCAATCGAGAAGGACTGACCAACAAGCCATCGTT
CCTGCACAAGACGTACCAAGCCGGGGTAATTTAGACGAAGACTTTCAAATGACTGGGCAA
GATCTCGAAAACTTTGAGCAAGCTAACGATGCTCTCCGACAAATTGGCAATCAAGGTCTG
CAACAAAACACACAACAAAGTCAACTGGAAAGATATCAAATTCCCACATCAGTTACAAAT
AATAGGTCGTCTCTTGCAATGATCCATGCTGGTTCATTTGATTCTGGCAAGGGCGCTATG
GCTACAACGTTACGACCATTGAACAATCCAACAATGTCATTTCCAGGTGGTCTTCCGCTC
CCCAATGACTCTTTGCTCAACACTTCTCATAACAATGCCGGTCCTTCTGTCAATTCGTTG
AGCAACATTTCTCACAACAGTGGCTTTTCTGCCAGCTCATTGGGTCGCCTCTCTGGAATC
AACAATGGCTCTTTGATAGGCTCAACGAGCATGTCTTCTCGCAGCAATAACGGATTTCCT
GCCAGCTCAATGAACTCTCTTACTCAAAATCACAGTTCCATGATATTATCTAACAGCGCT
TATGGAAACAGTGGGCTTCCTGCCAGTGCAATGTCAATTCTATCTCAGAACATGGGTTCA
TCGAGCAGTGCTTCCCGCAACATTTCAATGGCCTCTCTTCCTCAAAACGGCAACAACTCT
TTCATGGGTTCACCGAACAATGGTCCCCACAGCGCAAATAACAATCTCACCAATTCCATG
GCCTCTCGGTCTCAAAGCATGAACAACTCCTCCATGGGTCTGTTGAGTAACAGTTCCCGT
GGCACTCAAAACAACATTGGTGATTTCATGAAAAGTGCTTCTTACGGCAACAACAACTTT
TCTGCAAATCCAATGGCCTCCCTGTCTCAGAGCATTAATAGCGCCAATGCTAGTTCACCA
GAAGACTTTTTTAAGATGAATCCTTATGGTACTTCAAACCAAATGTCTCAGAGCAATAAT
GTATCCTCTGCCAATGCCCTGGGCGACTTTTCTAGCCACTCTACCTACAATAATGCTATT
AATTCTGGCTCTTCGAATCATCTTACCCAATGCAATAATACTTCGTCGCTCTTACCTCCT
CCTCACTTGAGTTACGCCTCTCAAAATAACAACGCTTCTTCTGTCAACCCATCGAACCAG
GTTTACCAGAACAATGGCAGCTCATCCAATTCATCAAACCCGGGATCATCTACAACTTCA
CGAAGTGCTATGGCTATCTCCTCAATTCTCACGGGGACCCAACCTCATGGCAATTGAGCT
GATAATCTCCAAAGGACAATCAATTTATTGCACTTTGCGAGAATATCCTCATTAAATATA
CATTTCATATCACAAGCTATTTCTTTTTCTTGCATTTTTTTTCTTTTTCATAAACATTGG
CGCAAAGGAAAGCGCAATACCCTATAATGAAAAACGGCTACTATCAGGAGTTTATCATTT
GCAATTGAGGCAGGGTCTGGTGGATGCATATAAGGGTTATGAGGTTTCATGGATGCGTAC
CATGTGGTGGCGTCTTAGAGGCTGGTTTTTATTCAATTGCCTTCAAATGACATGGTGAAT
TGGGCATCACAAGAAACGTATAGTTGGCGATGGGGAGTTTTAGCGGCATATGGATACTAG
CCATTGATTTTCTCCGGTATCTTTTTTCCTTTCACTTGTTCATTCTTACAATTTCAGTTC
TCGTTGCAGATGGTACGGGATGGCACGCTGAACAATTGTGAAATGGGGCTTCTCTTGGTC
CACGAAAATGCCATTCAATGAGAGGGAAGGACGACAGGATAGAAGATCAATCGGATGTAA
TTTGAGAGTTTTGAGCGAACTGAGCGGTTATGTGTTGATGAATGACATGGGGTGGAACGG
ATTAGTGGGCTTGTTTCCTGGACTTACTTAGCATGATACATATATTATACCACCAAGTAC
ACATATACACACTGGAATTCTGATTCTCTCAGCCCTACGAATCCTGATTTGATCTCGGGT
GGGCAAGTTAGCGTAATCATTATTCTATTGATAATTAATCTCATCTAATTGAATATGATT
CATTGTGAACTTTCCTCCAGGAACAATATGACAATACTATT
>9d31d1a4-c7a3-469c-893b-78254b223563 (mRNA) 2390 residues [Bfab07:291110-293499 + strand] [genomic] name=Bfab07g00770.1
TCACTAGTTAGATAAAGTATTCTGAGTCCGGAGTATGCACGCACGGTAAACTTTGGGTTT
GCTTGATTGAAAAGCAGCTCGATATCTCTTTTGATGATTCTTTTCGATTCTTCTCTTGTG
CTTCTTACTCTCACTCATATTCTCACCGACACATTTTGCCTTCGGGGGTAATACAAAGGT
GTGCCGTCGATCGAGTTTGGCCTTTCGGCAGTAGTCCAGGAAAAGGAGCACCAAAATGGG
TTTACTTGGTTCAAAAAATAGTAAGTATCAATTCGTTCTTCGCCAACCATTTATGTTATC
ACCATTGTTATTCTATCACAATGGCTTCAAAGCTCCAGTATCGAATACAGACTCGGTGTC
TAAAAAATTGTCTGGATATCTGATTGATCAAGTGATCTACCGAGGATACAATACAGTATC
TCAGCTCAGCTCAGCCCAAACCCTGAATTTTACGTTTCCGAGATGAATCTAACTTGATCC
AGAAGAAACGGGATCTTCCCCTCAACCCTCATTCTCAGAGGATCAAGAAGCCGCTTACAA
GGGAAATAATAGCTATGTACCAGATATTCCATCGGCGGAGGGTCAGCCAGAATTCGATGA
ATTGCACGTGGTTTGTCCTTCGCATACAACGGAGGCCAAACTTATGCGAAAAATCGATTT
ACGTGTGATTCCATTTTTGTAAGTAATGTTTTGTGTATCTCAAAATCCATTCTGACTGCC
ATAGATGTATCTTGTATCTTTTGGCCTTTTTGGACAGAGTCAATATTGCCAATGCCAAAT
CTTTCAAACTCTCAACAGATTTGAAATTGACCGGCACTCAATACAATACCGCTTTGACCA
TCTTCTTCGTCCCATATGTCTTCTTCGAGATTCCGTCAAATATCCTCATGAAGCGCCTGA
ATCCAAACATCTGGCTTTCATCCCTCATGTTCCTTTTTGGCCTCGTAAGTATCTGTCAAG
GACTCGTACAAAATTTCTCCGGTCTCCTCGCAACCCGTTTTTTCCTCGGTCTATGCGAAG
CTGGTATGTTTCCTGGCTGTTTCTACCTCATCGGTATGTGGTACAAACGATCCGAAGCCC
AACGTCGTTACTCCTTCTTCTTCAGTAGTACCACCTTAGCTGGAGCATTCGGAGGTCTTC
TCGCTTCCGGTATTGGAAAAATGGATGGATTAAGAGGATATTCCGGTTGGCGTTGGATTT
TTATCATTGAAGGAGTCCTTACCTGCGTTGTCGCCCTAGCATTCTTCTTCCTCATTCCTT
CATTCCCAGAAGATGCAAAATGGCTCACTCCAGACGAAAGAGCATATGTAAAAGCTCGTC
TCCAAGTAGACCAAGGAAGAAGCGCAGCAGAGCGTAAAATCACTTTCAAAGACGCATGTA
GGGTCTTCAAAGACTACAAAGTCATTCTCGGAGGTTTCATGTATTTCGGCATGATTATCC
CAGCCTACGGATACGCATTCTTCGCACCAGGTATCATCTCCACCTACGGTTACTCCCCAA
TCCAAACACAACTCCACAGTGTACCTCCATGGGCGTGCGCATTCGCATTCGCAATGTGCA
TTGCCTTCGCATCGGATTTCACACGTCATCGATTCGCCTTCACCATCGCGCCGATTTGCG
TCGCAATCACCGGTTTTGCTATCCTCCTCACCGTTCACGATAATACCAAACTTCAATACG
CTGCGCTTTTCCTCGTTGCAATGGGTGCCTACGCCGCCATGCCCGTCATCGTCTGTTGGT
TCAACATGAATCTTGGCGGTCATCACCGTCGCAGCGTGGGCACGGCGTGGCAAGTCGGAT
TCGGTAATATCGGAGGAATTATCGCTACCTATGCTTTCCTTGCTAAAGATGCCCCGGAGT
ATAAGACGGGATATGGAATCTGTCTGGGATTTTTATGTTTGAGCGCCATGTCGTGTTTGC
TTTATTTCGTGGCGGTCATGTTGGAAAATCGCCAGAGGGATAGGAGACCTAGGGATTTGG
GTCTTACGGAGTATGAGAAGACGGAATTGGGAGATTTGAGTCCGGATTATAGGTATTTAT
TGTGAGGGGTGTGTGACAGTAGTGATGATGATGATGATGAATGGGGTTGGGGAAAGAAAA
TGGAAATGAAGTATGAAAAGATAAGAAAGTGGACTAATGGGAAATGTAATGAAAGGATAT
GAAAGGATATGAAAGGATATGAAAGGATATGAAAGGATATGAATCAACATGTATAGCACG
ATCGATCAATCGATCGATACTAAAAGTTAATAGCTGGCTGGGAAAACTTGGGTTTAGTTT
TAGTTTTAGTATGAGGGGAGGGGAGGGAAGTTTAGTAAGTTAAAGTAGTAGTATGTAGGT
ATATGATTAATGATATGAACAAATATGTAACTTTTCTTTATGTATTGAAT
>1823ac26-b395-4699-ab5d-7066a70b9a8b (mRNA) 1271 residues [Bfab07:295370-296640 - strand] [genomic] name=Bfab07g00780.1
TGCACAGGGGCAGCAAGGCTGCCTAGCATTCCTACACGTATTTAATGAGATGAATCCACT
GCAAATATCATCTGTCAACCCAAGATTCCTTCGTTCACTACCACTTGTTCATTCATAGTT
GAATTACAATATGTTGCTCTCTGCAACCTCGCTTTTACTCCTCACGGTACCTGCTTTCGG
GCAGACCCTTAATGCCTGGAGACAGACCGTCTACGGAGAAGGATGCTGCGGCTATGCTGT
AGACGGGAATGTAACAACTTCCGATGAAGTTGTCTCTTTACCAGATACTCTTGCTCTTCT
CTTCAACTTTCAAGCTGGATATATCGGTTTTTATGTTCAGTCCTCCGGTGCTTACATTAC
CGACTACTATGTTGAAGCTGTTGAGAGTGTGACGTTCAAAGAGATTATTGTTGGAAAGGT
TTCCAACGCTACATCCAACTTTACTGTTGTCAATTTTTACGACTCTGTTGGTGAAGCCGG
AATTTTTACAGATACAATGTTTTTCCATGTTACTGGAGTATCTGGTGGAAACAGTACCGC
ATTTGTCAACGAGATATATCCCATCTACCCAGGCGATACCATTGTATACCCCTCCGGGCA
ATCCGCCCAACCCTCCCCAACCCAAACTACAACTGCAATCCCAGCACCAACCACAACCGT
CTATCCCACACCCACAGCTCCAGGTATAACCCTCAATGCCTGGCCCACCATCTCCGCCAC
CAAGCCCGTCGTTCAAGACAACGCAGGCACATACGTCGATGGTAATCCATCCACCGGCTT
AATCTCCTCGCGTTATTTCCTCCTTTTCAATAGCGCTAGCACATACGAAGGATTCTACAT
CTTATCCCAATCACCCGACTATATTACCGATTACCATGTCATTGCGCAAAATCCTATCAC
GTATGCAAACGTTGAAGTCTGTCGCGTCACAAATGCTACGTCAAATTTCACTCTTTGTGC
ATTTAAGGATGAGGATGGGAATCCAGGGTTTAGGAGTGCAACGATGTTCATCTATCAAGA
TGGTGCGGAGGATGGGAAACTTAACGATGTTTATCCTATTTGGCCGGGTGATGTGATTGT
TGACCCCAATGCTTGATTTGGGTATGAGTTATGATATGATAATGTTAATGAGTATCTTTG
ACTGGAGAGAGATTGTCTTAGATTTTTATAAGAGGATTCTGGGAAGGAAGGAATCTAAGT
TTTAGATATTTCCGGCCCATAAAAGTTAATGAATAATGTCAGCTGTCAAGAATTCCTTGC
ATCCAATGCTC
>cc28f77f-b262-4317-aa19-86dc28a6a611 (mRNA) 1812 residues [Bfab07:297399-299210 - strand] [genomic] name=Bfab07g00790.1
GCATCTTTACGCGTTGTAATAAAGTTGAGAGGCCGAAAAGGACTTCTGTGTTTGAAAAGA
TCAGATGAGATAGGGGGGTTCAACGAATTCTCGCTTCTTAGCGTGTAAAACCCTGGATTC
AAACAAACTTTCCAAATCTCAATTTTAATTCCGAGCTTCTGCTTTTCAAGAATCAGAAGA
CACGCGCCAAGAAACCATTCTCATTCTTTATCGACAATATCTACAGCAAAATGGAAGGAA
AGAGCACAGAGAAAAAAGCCAAGGACATAAAAGCTAAAGACATAAAAGGTGCACGGAAAG
AGAAAACTGACAAGAAAAAGGAAGAGAGACCGACTCATTCCTCATCTCAATCATTACCAC
CACGAACAATCTCTAAGCCTAAGCCTGACGATGGAGATGTCTACAAAATATGTGTAATGT
TCCTGCCACAGATGCAGAGAATTGTTGAAACCGGAATGGTTCCTTGCGACGGAATTATTC
AGCAAACACTGCGTGGGTTCTTGTGTGGACATGGAATAGTACCTGTAATTAGAGAGTTGG
CTTCCAAAGACGATTCGGAACCAGGTGAAAGAGCTCATCCAAAGGGTACTGGATCTTCGA
AACTCACAAGTGCTCTTGTGAAGCTTTTTAATGAGAACGCGCTTTTGGGAGAGGGAATGG
ACTTCTGCCACAGTCTTCGAGATCCAGAAAAGGAGAAGGCTATGCGTATCGAATTTATTC
CAGGGTAAGTCTCCCATAACTTTTGGTTCTAGCGCTTAATAGAAGAAACTACTGGAAAGA
ACTGACACTTGAGTCCAACAGCGGTAGCATTCCGGTTCAACTGCCGCTCAAGGAGAGAGA
TGTCTTATTTATTGAAAGCCATGAAACAGATGATCGGCCATATCTCATGCAGGATAATTT
TCCGGACCACATCAGAATTTCTGAAGATGTCTTATTTAAAGCTTGTCCTTTCATACACTC
GGCATTCGGTGCGAAGGATATCGGGAAATTCGCTGACCCTGACGATACTTGCTTGTACGA
TCCCGCATACACGTCGAACCGAAAGAGATGTATTCGTCAAGCAAAACTCGTATATATAGC
CGATCTGATTGCTTCATCCTATGGGCGCACTGCACAGGATTATCATTCCTTGAGCGATTC
AAAACAAATTGATAGCTGGCCAAAGGAGAAATTGTGGAAGCACACTAAGTCTTGGGTCAT
GTTTCTAAGAAATAACGACTTTAGTGAGCGCATATCTTCCAACCATGAGCTTGACGAGCT
ATGCATGCTTGCCGCCTTTTTCGGTGCTAAAAATAATGCAACCACCGCTTTAAGAAATGT
GTACCAGGCTCAGAAGGAAAGGTTGATCAGAGAAAAGACACATCCGAGACCTGTTTTGTT
ACCAAAAGAGGAACCCGAAAGAAAGAGATTGTCTCCCGAGAGAGCAGCGAGACAGAGCGA
CTATGCCCCAAGCGAGATCTGTAACGAGATGCTCGGTACTACTGGTTGGCGCAGTCGAGA
TGACTGAATTCCTGGTTCCTGGTGGGTTAGATTATTAATGCAACTTTGTTGGCATTATGA
TTTTAAGTTTGAGGCTTAATTTCTCGGAGATCTTGTATGATAAGTCAGCGTTGAGCTGCT
GGCGTTGACAGGTTCATTGGGTCTATAGTTTGGTCAAAATACTTGGGGGCTCAAAGGCGA
ATGCCACGTTTGGTTTGATTTGGGGTATGCGAAAGATTCAAAACACATAAGAGCATTGAG
GGGAGAAGATTTCGTTTGGGTTTGGGGCACAAAGAGAATTAAGGATACCAAAGATTGCTT
GAAGGGAGAATA
>eb49fea4-d530-45cc-982a-22dcdf36b3ff (mRNA) 1990 residues [Bfab07:299954-301943 - strand] [genomic] name=Bfab07g00800.1
GAAGCTAGATCTACTGCCTAGTATCATTACCTACAGTGCAGTTGAGATCCAGCCAATGCA
TTTTTTTTGTGTTGGCCGTATTTAACTTACGGTCCTACACTATATTTTCTTAATTTGCTT
ATAATCGCCAAACTCGTTCATCGTGAAACTTTTTTTCCAATATTCTCGACATAACAATCT
CATCAATTACCTGAATAACTTATCCCTTCACCAAATTTATCAAAGGAACCGACATTCTCA
ACAAAACACCTTTAATCCATTGAAATTCGAGCTTTATCAACAGATTCAAAATGGCTAACG
TGAATCACCAACCTGGTCTGGCTAACGCAGCTACCCAACGTGAATTTGCTTTTAGAATAT
TCCTACATCCACAACGTCCTATTGATATCAATGCCACTGAGATATGCGGTTCGTTTAACA
CACCTCAAAAGCCGCCCTTGTCTGGTAACCATACCGTTATGAACGCTGGAATTATTTCGC
GACAAGGAATCTTTGCTTGGGTGAGAGGAATCATCAATGAGCTCATATCATTCAACCTAA
ATAGTGTGAATTTGGTCCCTGCTCTCTGGGGACAACTATTCAAGATCATCCAGAATCATT
CCTTCTTTAAGCGTTGGATCTTTTCTCGTCCCAGACCTGGTCCAATGGGTTTTCTGACCG
TTGTTCACGATCCTAGCGAGGAGATACAATATACTGGAGAAAATGTTCTCGGTAGAGCTC
AAATAATTTGGCAAGAAATTGAAGCCGATTTGAAGAATGAAGAGCCTAATCAATTTATCG
GCGAGATCTTCCAGCAAGTATTTCATATCTGGCAGTATAAATGCTTCATGAATAACATGT
TGATGGATATGAGAGGTATGTTTCACTGAGTCATTGATCTTTTCGGTAGTTATGACTGAC
TGGTTTTGTAGGTCGCCCACGTACAACGGAACGTGATACATTTTCAGAGCTTGTACGCTA
TGGACTAATTCGACCATTACCACTCCATAATCATCCAGCACCCCAAATTAATCCTCCAGC
CCCAGCTCTCCAAGTTCCAGCTTATCAGCCCGCTCACCCTCCACAGAACCTCGTTGGTGC
CGATGTTGGCATTGTTGGTCATCCATCCATCATCGGAAACCCTAGTAATAACCCTACCCG
TGGAGCTTCGGGTGCTCGGGCGGGTGCTGAGCCAGTGACCGGTGTGTCTGTGGCTGCTGG
TACTTTAGAGATTAGCGACGATGAATCAAGTGGACAATCTGACAACACAAATTCTGCTTT
CAATCAGCCCTATCCCCGCATGCCCACGCCTGAACCTAACACCGGCAGAATGGTGAGCAC
TCTCATGCTTTCAGGCAGCGCCCTTGCCCACACCCTACGCGGAGCAAATCACGTCGTCTC
GTCTGCTATACCTAACGCTGTTCAGGCAGGTAGATCTAACATTCCCGCTGCTTCGGTCCC
TCAGAGTAACGGCAACCAACAAAATGGCAATGCCCAAGGTAATGGACAGCCACGTCCAAA
ACCAGGTGCTACCATAGAACAATCTAGACCACCTCAATCAAACCTCCATTGCCATTCGAG
CACGAGACGTCAACTACACATACCCCAGATCCCACCATTTAAGTCTGCAGTTCCAGGTAG
CTCTACCGCTGGTCCAGTAGCAACTCAAAAGCGACCTGCAACCACTAGCAGCAGCACTAG
CTCACCTTCAGATCCCTCGAGACCTTCTGGCAAGAAGTTCAAGATGGAGAGACCTGACGT
TGATCATTAGATTCATCTTCCGCGACAGGAACGTTGAGATTCTACTGAGGAGAGAAGTTG
CAATTCTCTGGTGATGGTTATGGGTGGAGAGCCGGGGACTCATTCTTATTTGCGCTAAAA
ACAATGATTTCATGAGATCTTTCATTCATGTTAACGATTAAGGACAAACTACTCTGGCGA
GAGAAGAGAGGGTGGAGGGCTGAGAAGGATGTTCGTAGGAAGTGATGATGGCTTTGACGT
CATCTCGTGG
>53c768e2-9d35-4dc7-bd2f-8325a775e6e6 (mRNA) 2698 residues [Bfab07:302699-305396 + strand] [genomic] name=Bfab07g00810.1
CTTGCTTCAATGTTAAAACTTGCATATTGGTTGAAATATTTGACCTGGCCATACGTTAGC
CCTATTAAATTGAATGTGTTATACAGGAATGATCCAAAGTGGAGGCATCGACATCCTCTT
TCTCATCAACCTAACAATATTACGACCATTAATCCATCAAATTCCAAGGATTGAAAAACT
GCAATATGTTCAACCCATTTGCGCGATCCAAGAACGATCTCCCATCGATGAATCGACATA
GCATCACAGCCTGGGCCCACGATATTATCGATGAACTGCAAAGAATCGGTACCTTGAATT
CAGGCGATGAGAAGGCTGCAGATGATATTTTTCGAGTGTACCAAAACATGCTTCAATTTT
ATTCATGGGTGTGCACACGTCCTAGAATTCATGTAACTCATGCCCAACGTCCTATCCAAC
AGCCTTGGGCACAAAATGACATTTTTGCTTCGGCACATAAGGTCTGGAGTGATCTTGAGT
GGGAACTAAGGCTAGAGAAAGATGGCGCGTTTGTTGATCAGATGATTGAACATCTCGGGT
GGTTTTGGAATGTTAAGAACAATTTGGTAAATCAAGCCCGCCATACCCGTGGTAAGTGCG
CATCTACTTTTCACTTTAATCCACATACTAAAGGCAATTATCAACAGGACTCCCTGTCCT
TTCAAGCATGCAAACAATGGCGGAAGCGGCAAACTATGCTAGAATTAGCAGCATCGATCG
TGCGAATATAATTCAAACTCCAGTGTCGAGAACCATAGCATCGGGTTTTCACTTCCACCG
TCCCGTGGCGCCTGCGAGCAGAGACAATCCGAGAAATGTTACAGAAGCTTTTCCTGCAGG
ACAAAACACAAGACGAGGAAGCTCAAGCGATGATAATCTGCGTCCGAGTCAAACATGTTC
ATCCGAAATTCCATCTATACGACAGCCGAAAACAGGTCATTTGCAACTCCCAAAATATTC
TCAATCAGTTCAGGAGCCGCCTAATTCTGCAATGCCAGTCGCTCTATCGGTAAAAGGCAA
ACATTCGCCTCATTTACACCCCGGTGCATGCTACCAACCACCCACTGCTCGTGATAAGTC
GTCGCACAATGTTGTTAACATGTCGGGTGATAAATATAACGACGGTGTTGAATATTCGCA
GATCTCTCAGGTTCCTGTCGGCCTGATCCTACCTGCACCACAAACTCGAAATGACAGGTA
CCCCAATAGAGCCCAGGGGTTCGGTGATGGATCCAAGCGTCTTACGACTAGTATACCATC
TGTCAAACCAGCTTTTAGTGGCCGAGAAAAGCATGGAAGAGATTTACCGAACTCTCACGA
TGGACAGTTAGCACAATCTCATAGCGATATAACACGTACCACGGCCGGGAGTTATTCATC
TAACATCAGACATCCTGTCAATACCCTAAGTAACGATGTGATCGTAATCTTAGATACGCC
GTTACCGGAATCAATAACTACACCTATCGAAAGACTCAGGCCGAGAGATTATCGCTCCCA
TCCAAGTTCACCCGCTATATCTTCTGAAGATAAACATGAAGTTGAACGTCCTTTCTCAGT
AGGAAGACCTCCTGTACATAGCAGAGACATAACTAGGCATTCTATCTATCCGATTAATCC
TGCGGGACCTTGCAATCAACGCTTAGTAGAATCTGCAGAAGTAGACAAAATGAGAAGCGA
ATCTTCTGATCGACGATCAACCAAACAGGGAAGCGATGGTACGGGAGAAAAAAAGCAGAA
AAGAGTCACTGAAGTTAGTGATAAGAAGGCCAATGCCATGGAGAGCGATCTGAGCACACC
CAAGGAGAAAAAATCCACTCCTATCAATGGCGATCAGCGCAATATGAAGATTGACTGTAT
CGGAAAAGACGAGAAGACATTGACTAGTTCTATCAACTTGATACAGAACTACAGGATGAA
TGACTTCCGAAAAGCCAATACAACAAGACCTGAGCCTATCAATACTATTTCGGCAAATCA
AATCAAGAGAGCGAGGATCAGCGAAAATTCCACAATTTCCTCTCCTGGTTATACTTCTCC
TTACACAAACTTCCTCAAGCAGTACCAACTGAGCAATCTTAATAGTCCTAAAGGATCGGG
AATAATCACAAATTTCGCCGGAGATAAGGGGGAGGAAAACGAAGCTGTTGGCGGTGGGTA
TATTGGCGAAAAAACTGGCAATGAAAAGTCTGTTGGCGAGAAAACCCTTGAAGAAAGCAC
CATCGGTAGCAAACATATGAACCAGAAGTCTATCAACGAGGAGCTGGTTAGCGACAGATT
CATCAACGAGAAAGTTGTCAACGAAGACTCTACTGGCGATGAAATAACAGTAGAAGCTCC
AGCTATGGAGGACGCTGTGAGCAAGAAGACTTCGAGAAACAAAGTCGCATCGGAAAAGTC
GTTGAGAAACAAGCCACTTTCTGCGAAGGGCAAAAAGTCCAAATCACTCTATCGTCCTTT
CAGCATGAGATAATCCTAGAGAAATATGTTTTAGAGAGTCACTGTGAGCTTCTGGGGACG
GAATGCAGATGGGAAGGGAGGGGGCCAGCAGTCAACCAAGTCTAGTGTGCTAGGTGACTA
GACAGTGTTATGATAGCGTCTATAGCCATCTATAGATCACGTATGTACCCTTGGTCAGGA
GGCTCGACCAGATAGATCTTCTAGGCATTCGAGTCTAGCAACTTCATCCACTTATTTT
>3fc4849e-5276-4b61-bcd6-488302973ee0 (mRNA) 1096 residues [Bfab07:308478-309573 - strand] [genomic] name=Bfab07g00830.1
TTGTCAACTTCATGATTAATTAAGAACTGTGAGAGACATTCGAGACATATATCCCTAGTA
CCAGTATAATCAAAGCTCCTTGAATATGGTATGTTCTTGCCGATCTTTTCTCTCCACTCG
GATATTGACATTGGCTGCAGGTTTTCATCTTGGGGATCTCGTTCGCTGAGAGGAATCTGG
TGAAGGTAAGGCTCCATTCAACTCCCATTGAGCCTGCTACAATCCTGATTCGCATACTGA
CGGCGTGTAGAAATCTCTAGAGTCTTTCTATGGCTTAGGGAACCAAGCTTCAGCTCGTAT
CATGGCCAAGCACTACATCCATCCCACGGCGACTGTCGGTTCCTTGTCACAAAAAACGGT
CACATCTTTGACCGCTGAGCTTTCCACCATGCCTTTAGAGACCGAATTGAAACGAAGGTT
GCAGGATAACATCGAAAGAATGCGGACAATGGGTAGCTACCGGGGGAGGAGGCATGCGAT
GGGCCTGCCAGTAAGAGGACAGAATACGAAGAGTCAGGTATGTAGAGACTTGCGGAACAG
GGTATGCAAGATTGCAAATACTAATAGACAATAGATATCAACGGCCAGGAAACTCAATAA
AGTACATAGAAAAGGATGAGAGATTTACGTTGGAAATGTTTGTACAAATAGGATTGTATT
ACGGGCGCATCTACAGGTTCGGGGGGCTATACGAATAGTGACATCGAAATTAGAAATGAA
TCACTCTTGGGCCACAAGGCGTAAGGTCACAATAGATATGGTGGAATGGGTCGCGAATGG
CACCGATTGTTTGCAAACGTTGGAAACATTGAACCGGCCAATTCTCCGCCCCAACGTCGG
AGATACATACAAATTCAGGTATGGGCACGCCACTTTCTAAAGCCTCACAAAGTGCAAACT
GAAGAGTCGTGTCTGAGACTTTTAGAGCTTCAAGCATATGCTCTTCCATTTGTAGTTTCC
TTAGTCTCATCCACATGTTTACCCGCACTTTTGTTCTTATCTCCGGTCCTTTGCAAGGAG
AAAGCATACACCTTGCGATCATTCCCAATTATGCTTCTTTACCACAGTACTTGTCTGATA
CTCAGACGAAGCAAAC
>7fb72513-cf82-49ae-abdd-d77494194673 (mRNA) 1237 residues [Bfab07:309723-310959 + strand] [genomic] name=Bfab07g00840.1
TTGTTCTTCTAAGGTTTTTCTTGGAGGGCATATTATCTTCTTTTTAAAACTACACTGTAC
CCAGTCGATACCCAATTGACTTTCAAGATGCTCACACTTCAACGTTTTGTAGTCTCTGCA
CTACTTATCTTAACTGTCACCTTTCTCTTCTTCGCCCAAACGGCCGAAGCTGCCAAAGGA
CCCAAGATTACCCACAAGGTCTACTTCGACATCAGCCATGGCGATGAACCCATGGGTCGT
GTCGTTCTAGGTCTTTATGGAAAAACTGTCCCTGAGACTGCCGAGAACTTCAGAGCTTTG
GCAACTGGCGAGAAGGGATTCGGATATCAAGGCTCTACCTTCCACCGTGTTATCAAGGGT
TTCATGATCCAAGGAGGTGATTTCACAAAGGGTGATGGAACCGGAGGCAAATCAAGTAGG
TTACAAAGTCTGCGAGCGAAGTGCGGGGTTCTAACAATTGATAGTCTACGGAGCTAAGTT
CCCAGATGAGAACTTTAAGTTGAAGCATTCCAAGAAAGGTCTTCTCAGCATGGCCAACGC
CGGAAAGGATACCAACGGTTCCCAATTCTTCATTACTACTTCTACTCCTGGGTAAGCCAT
TTACGCAAGTCCTGCAATGGAGCACTCTCGTTCTAACATCTTCTAGTCATCTTGATGGTA
GACACGTCGTCTTTGGCGAAGTTTTAGAGGGATATGAGATCGTCGAGGCAATTGAGAACG
TAAAGAAGGGAGGATCTGATAGACCAGTTGAGGCTGTCAAGATCACTGAGAGCGGGGAAT
TACCAGTACCAGAAGAAGGTATCCATGTGGAACTCTAGAGTAGACTCCTTTCGCGGCATG
CGAGCATGATTGGGAGGACTTACTGATTCGTCTGTCTTACGTGCTGTAGATGAATACGGT
ACTGCTGAATTTCAACACGGCATGGAAGAAGTCGAAATTCCTCTTACACCAACCGATCCT
TCAACTCCCGCTGCTGCCACTGCAGTCATTCCAGTTGTTGGTACCCCACCAAAAACCGAG
ACAGAGGAATTTGGCTATGCTGATGAGGCTGGTTACACTCTTTTGCAAAAAGGATTGTTT
TTGGCTGTTATTTTAGGATGTGTTGCCTTCTACGTACGAATGAATAGAAGAAACAAGAAG
TTTGAGAGGTCACTCGTCTAGTTATATAGCTTTCCATTTAAGATCACTCTATATCTACAT
TGCTAGTACACTCTCAGTCTATTCATATTCTCATTTT
>d2aa0df7-8136-4170-8655-f370317f09a1 (mRNA) 1776 residues [Bfab07:314322-316097 + strand] [genomic] name=Bfab07g00860.1
AACCTGTTAACATATCCATCTATTAAAGCCGATAAAACTTCTAAAACGACGCCTTAGCTG
TCAGAAATTATGGATTTCTCTTCGGAAATCAATAGACCTACCGTCATTCGAAAGTTGTAA
GTCGTGTCTTTCTATTTACAGCTTAAGAAGATCTGACTGCCCCTTAAAACCAAAACATGA
GCTATCGACCATCAGCTTTAATTCTACCCAGACTAACAGTTGCCATTGTTTTAGTGCCCT
AGATAAAGACCATCAACCCCCAAAACTAATAACCTTTCAATCAGTATTCCTCAAGAATGA
TCAGGAAAAAATTCGCATGACCGAGGCATCGGAAGCCATTATCTTTAAAAAGTTACCTTT
GATTCAGATACTATTTGACTTAAAGCTCAATGGGATGTTGAAAGACGACAAAGACCAAAT
TTGTTATGATCCAGAGCACGCAAGAACGGAACGACCCGTATTGCCCAAGGTCCCGGGAAA
AATAGTCTACATGTACGAATTTATCCAGTCGAACTTTCAAAATAGAGGACAGGATTACGA
TCAAATTGCGAAATGGAACATCGGGACGCTTTGGACAATGATTGATTGCCTTGTACGTTT
CTTGGATGGAAAACCTTTACCTCTCGATTCCAAGATGGGTCTCATGAAAAAACACTGGGA
CCTCGAATTGATAGGTATTGAAATACTTGCAGTATACCTTGGATGTATTGAAATGAGTGA
TGAAGCTGTGCGCAACGCGTTGATTTCATATATGCGCCGGCTTCCTACCCCTGGATCCAC
AAACTCTAAAGATAGCTGGGAGAGAACATTCGAAACAACGAACCATGCGAAAGTGTTTAA
TGGGAACAAATTCAGACAGCCTGAGATTATTGACTTGACCGAAGACCCGATTGCTGCCCC
AAAGACTTTGGAGAAGAAAACGCAATCAGCAACCAAGTCACAGATGATAAACATAGGTCA
ATTAGTTTCTGTTACAAAGAGCTTGGGTATAGAGCCTCCACCATCTTCTACATTAGAAAA
TTCTGTTCAAGTAGCTCAGTCAAAATTGATTTCACGGAAGTCGAAAAAGGGGAGCCAGCC
GTCTGCTACATTGCAAAAGTCGAAGAATACAATACAATCGAGCAAAGAATCCCATCAAAC
TACCACCCCTCAGACGTCAATCGAAGCAAGTCGATCGAATTCTGCTCGTAAAGGCCCTCA
ACTTATGCCGATCGACGCATATATTAGCCTGAACCAAACATACGGTTGCTTTCTTCATGT
GCACATAGGCTCAGCAATGAAGGGCTCAGGCTTGATTGGCCGACTTCTACAGGACTTGCA
TATGGGACTCTTCAACACCGGAGATATGTCGAAAGTAGCTGGAAATAATCGCAACGGAAA
ACTATGCTGGTTTGGGATGAGGTTTTGAAATACTTCAGTGTGCCTGGAAATGTGGTGGAA
AATATGCTTGCATGGACTGAAGATGATCGTTGGGCGCCCATGGTCATGTTCATTGAGCGG
TGTCAACTGGATCCTGCTTTGTGGCAAGATTGGGATGAGCGAGATTTAGCCCTTGCTAAA
TATTTCGATATTTTCGTAAAAGCTACTCCTGCGGCGAAGGATATTTAGGCTGATTGTGGT
TTTAATCCTGAATTCGTATTTTGGAACAAACTTTCTGGTTGAGCGATCGATTTCATTCAG
GGAAATGAAAGAAGTAAGGCGGACAAAGCTTTTCCTGTTAGAACAGGGGAGGAGAACAAC
TAAGGAAGGGAGTATTGTAAAAGGATATTGGGTCAT
>8c3ad956-f502-41ce-a070-21afa56abcf4 (mRNA) 2879 residues [Bfab07:316135-319013 - strand] [genomic] name=Bfab07g00870.1
TTTTTTGTGAACGTGGCGCCCGTATCAGTCTTTCAAATTTCATCACGAAACTATGTCACA
GGCTAAAACAAAGCAGTCGGTCAGTCCGTTCAACTTCTGACATTGGAATAAATTATTAAC
ACTCCTCGGCAAGTTTCGGTCGTTTATATGGGACAACGACACGCACCTCAAGTCTGTTGA
AGAGCGAAAGCTTCTGCGGAAGCTTGATGCTGCTATTCTCAGCATTGGATGCTTAGGCTT
TTTCGTAATTAAACCTATCAGTTCATGACTTTCTAGATAGTTGTTGAAGCATTACTGAAA
CTGGTCATCTTCAGCTGAAATATCTTGACCAAAACAATCTTACAAATGCCTATGTTAGGT
ATGGCTGACCATGTTCCAATATTGTGTTCGGATGATCTAATTTAGGCTATCAAAATAGTG
GTATGCAGGAGGACCTCAAGATGTTCGGCAATCAATACACCTATGCTGTGAGCCCTCAAG
TTTTTGATTCCTTCTGAGAGTGGGTGCATGGACCCATGAAACACTCTTTAACATTTACTC
ATTTCATGAGTCCTTACATCCACTCTTGATCTCATAAATCATTTCTCACGATCTCTCCTA
GGGAACCTTTTATAACTGCGCATATGCTATTATGCAAATACCATCGACTCTCATCATCCA
AAAAGTCCGACCGAGCTATTGGCTAGGGCTCATGGAAATTGGCTGGGGAACTTTTACTTT
TGCACAAGCTGGAATGCACAGTGTTCCTCAGCTGTACGCATTTCGCTTTCTAGTCGGGCT
TTTCGAAAGTTCATTTTTCCCATGCATGCTCTTTATACTTGGCTCGTGGTGAGTAAGCGC
TATCATCTATTCACTCAAAACAGACTGACAATTGAGCAATGCAGGTATACCAAGACTGAG
CTCGGTAAGTTCCAAGGCATAAACCTACCCGATACCGCAAATTTCTGATGTTTCCTGTTT
TCAAATAGCAAAGCGTATTGCTATATTTCACATGACTGCACCTCTTGGAACAGCGTTTAG
CGGTTATCTAGTAAGCAAATCAGGTTCCTGAACTTTCTGAAACTCATAAATGCCTAGCAA
GCTGCTGTTCACACCAATCTTAACGGACGCCATGGGCTTGCGGGCTGGCGATGGCTATAT
ATTGTGTGTGGGGTAAGTGATATAGAATCTATTTTGGGTATTTTATTTAATATATCTCTA
GATCATGACTCTTCCCGTCGGGTTTGCAACAATTTTTCTTCTCCCGGACACACCGCATAA
CACGCGAGCCTGGTACTTAACAGAAAATGAATGCGCGCTTGCAATTGAGCGAGTTGAAAA
GGCCGGAAAGGCAGCTCCAGTACCAATAACATGGGCCAAAATTAGACGCATGTTCACTAG
ATGGAGTATGTCAGGCGAAAATCGACGACTTAATTGTCCGTTGGTTAGCCACCCACCCCA
TTGTCCCTCTTTCTTTCGTTCATCCTATTCTTCTCCGGCTTTTTTGTTCGGGTTAGCCAC
CCTGTCATCCTCCCGCCTGCCTTTTTCTTTTCCAATTCTATTTTATTGGCTAGTCACCTC
TCGGTGTAAAAACCGTTGTCATTATGTCATCGCTCTTTCCCCTTGTGGAGACGTTGTTGG
AGCTTCTTGTTCTGATTGTCTGGACGTGTTTGAGCAACCAGAAGTGGAAGAATTTGGTCT
CCGGACCATGTGTGATCAGACTGCTGATAGTTTCCATAGGGTGGTATGCGCTCGTATCAG
GCTATATTGTAAGTCGATCGCAACACTTCGCTTTCCACCCACTAATTCAATAAACTAGCT
GTACGGAACAAGTTGTGCAGCAAGTAGCTATTTTGCTATTTGGCTCAAATCTGAGAAGTT
CTCAGTTACCTCGCGGAACGTTATCCCATCAGGTGCTAGTTTAATATCCGCTTTCTGTGT
CATTCTATGGGGTTTTGGTGCAGACTACTCTGGCAGCCGGTTTGCATTTGTGATTGGACC
ATTAGTAAGTTACAAGCTCAGCTTTGAAAATTGAGTATGCTAATTGATCAACACAGAGTT
ATGGGTTGACTCCTAATGGTATTCTTGCTGTTTGGCCGAAAAGCGTGAAGCTAAAGAAGT
TTGCGTTTCTCACGGACGGTGTTCAAATAATGACTGCAGTCTTGTAAGTTTGTATTCCAG
TGTTTTCCACGTACAATTGCTAATTTCGGATGATGCTATTAGTTATGCATGGGCAAATGA
GATATGTGCAGGAGATAGTGAAGAGAGAGCTATTGTTATAAGCAGTATGAATGGCTTGCA
ATACGCTGTAGGTATCTTCAACCATTCGATTTCGGTAAAATTACTTACCCATTAAAACGC
AGGTCGCAGCCTGGCTTCCCATTGTCATTTTTCCGCAGACCGAAGCACCCACATTTCGTA
GGTGACCTTGAAAGCCTTTTCTACAAAGAGTAACGGCTAATCACTAAACAGGACGTGGCT
TCCCAGCTACATTTGGATTTGTCATCGCGGCTCTCCTCGCCATTTTACTTATCCAGTTCT
TTCACAAGCGCGAGTTGAAGCAACAAAAAAAATTGAACCACGAAGATTCTGAAGCAACAA
ATCATGAAGAGGTTTTCTATGTCGAGAATGAGCCGACTAAGGGGGTTGAGGGCGATGGGT
TTCGAGAAATGGCAACAGCTGGGGCTGTTGCTTCCCACTAGATTGCGATGGGGACCGAAG
GTGCAGACTGCCGGCACACTCTCTATGCAGTCGGGATGATGCAGTAAGAATTTGAAGATA
GATACAATAAGAATTTAGTAGCTTAGGAAATTAAGATCTGGAGGAATAGATTGTCTCATT
AGTGGTATAATTCATAGATATAGAGTTGAGAGGGTCGAAAAGCCTGCAGTCAAAAGCTC
>6e1f24a9-41b1-4285-921c-0633e5673876 (mRNA) 1819 residues [Bfab07:319513-321331 - strand] [genomic] name=Bfab07g00880.1
TTTCCATTTTCGCTCTCTACCGTAAACTTCCGGCACTGTGGAATATTCAACCTTTGCTGA
TCGTTGAAATTCTGTCATTAATTAATCTTGTTAAATCTTCCAAGATCCGACTTCTTCATT
TTTTGTTAATGTCGTACGACGGAGACGCGAAACCATAAGAAGAACCAAACATGGCTATGC
GCAACTTGTCGTTGGAACCTGATGATTCAGATTTTGTTGGTTTATGTTCAGTCCTTCTGC
CTGAGATCCAGAAAATTGTGAAAGATCGCAGAGTGTTGGAAGATTCCCCAGTTCGGCCAT
TTTTAGAAGATATATTGCGCCATGATGGAACACTTCCCGTTCTCAGAGAACTTACTAAAG
TCACAAAGTATCCCTCAGTCAGGAGAGCACATCCAGATAGGATACCAAGTACTAAGTTAT
CTAGAGCGCTGGTTTCCACCTTCAACAAAAGCATTGGACAGGATGAAATAACTGTGCAAG
ACTATGTACGCAATAAACGATTGAACAATAAGAATCATTATCCGGCGATTCAAACAACCA
ACAGGCTTTCATCCAGTTATTTTGGTACTACAATAGTAGTGCCACCTCCAAGGCCAATTC
AATCGGTTCCAAAAACGTCAAAAAAGCCAATACCTAGTATCTCGTAGGTCTTGTCCTTCC
ATATAGAGTTAATGATGAAGAAAAGCAGATTACTAATGTTTGACCTGTACCGCAGGGAAA
TTTTGCAAATGCCCCCGCTGAAAGACCGAAGAGTTTATTTTCTCAAAAGGCATGAGACTT
CAGACGTACCATATTTGGCACAAACCGAATTCCCAGAATTTATTACCGTGGGAGAAGAGA
AATTCTTTCAGATGTGTCCCTTTGCAGGTTTTGCATTTGATGTAAAGCGAATCGGGATAT
TCTCAGATCCTGATGACAAGGCAATATATGACCCTGAATCAACCCGGAACAGAAAATTAT
GCATTGGGAAGGCGAAGATCATCTACTTGGCTAACTTGATAGACTCTACCTATTTCCGTG
AAATACGAGGTTCTCAGTCCTCGTACGTTACAAGAATACTTTGCGGATGGAGTATCGAAA
AGATATGGTTGAACACGAGGACTTGGGTACTGTTTGTTGATGGGAAATCTTTCGAAGAGC
GAATTTCTTCTGCGGCGGAGTTGGATGAAGTGTGTATGCTTGGTAATTTTCTGGGTGCAA
ACAAAGAAGCAACCGGTCTCCTACGGAAGTGGTACCGTAATCATAAGTTGAAGGATCATC
ATGGGAATTCTTCAATAAGTGGTAAGCATTCAACATAGGTCATTGCTGTGAGGTTATACT
GGGCTTCAGTGGTTGGAATTGCAGACTGACAACAAGGGCCTGAAAGATTTGAATCACTTG
TCAGGCGAGTCGAATGCTTTGAGTTTTTGAATTTAACTTAGCCATCCAATTACTTTCAAA
CTCGAAATCCTTAGCCCAGTCACCAACTCCAGAACACTGGAGTGACTGGACACCCTCTGC
GCGTGTTCATGAGATTTTGATCGACTAACGTTTGTTTTCCAACAGGTAATTCTCTTGCGA
ATAAGAGAGCTCTGCAATCAGATGTATTGCCGGTAGAGGAGGAACAAAGTAAGAGACACC
GTGGAAACGATTATGTTGCGGATGAAGTTCAAAACGTGACTTCAGACCTGGGATGGCGAC
ATCGTGATGATTAATCAAGGAGTGGTGGGTTTTGATGGAGCGGATGATGCGGCCGCTGTG
GAGGAGCTACTGAACGTGGAGGTTCTAACTTTGGTCGACTACGACTTCTTAGACAATTCA
AGGAGGCAAGGAACACATC
>9365fb66-a3c0-4cf4-bdf0-7f9dd845f7b0 (mRNA) 2900 residues [Bfab07:324415-327314 - strand] [genomic] name=Bfab07g00890.1
AAGCATTACTACGAAGCAGACAAGCTTTTCATGTTCCACGCGAACTGTATGCCGGCACAC
ATTTCCTTATCTGCTTATCGCAAGTACCTGTCGGTAAATTTGATCATTCATTCCTTCGGC
AGAAGTCTTCTGACCGAAATGGACGGACTGAAACATTTGTCATATACTCTGGAATACTGT
CCAGGGCCGACTCGACTGTACACAGCATGCCTGATCAGGTCACCGAGTAACGTTACAACA
AGCTTTTTTATCATGCGTTTCATTGAAGTCCTTCAAGCTGAAGTCGTTTTCTCCTGACCG
CTGGGGTAAATCCACTTTTTCCTTCATCCCACCAAGTGGCTTATCGGCAATCTTGTACCC
CTGACGATCTGCCGGGCATTTTATCCCCCAGAAGAAGGGCACCTTCCATATTTCAATACC
CAATGTTTTACATGTGCCGGGGAAAGGTAATTCCAGATGTCTCTCACATGCAACTTAACC
ACCGTCATTCAGGATTCAACTCCTTAATTTCCTCAAATTCCGCGCCCGTGATGATTCTTG
GAACTTTTTCTTGTTCCCGAGGAGAGCGTTCTATCACATTTTCAGTCAAAAGTAGATCCC
AAGTAGAACCTCGCGGATATCGGATTCCTTATCGAGAAGTCATTTTAGCAACCCCTTACC
TCTGTGAGGAATGGACGTGGGCGTCAATGGTTGGAATGTGGGAATCCCAGTTTTGGGAAA
TTATCAATATTGTCGTTTGACCTTTTACCTTCAAGAACTCATTGTAAAGTTAATATTTGG
TTGCAACATGATTGACAAGTTGCTGTTTGTTAACGCCAATTATCTGAGTAACGTGTGGTC
ACCTTGAGGGGAGCCACAAATTCACTGCCGCGTAATTGCCTGAGTGTTGGGTTGTGAAGA
TAACACAAGTAAGTATAAGAAGGTCGAGAATACCATCCAAAGAGTGGTTCGAACAAACAA
CGAGACTTCACTCAAAGTTTATACTTTCGATAGCCGGACTTTTCGAAACTACCAACATCC
ATTCAGTTCATTCTAGGCTTAGATTTACAATTTGACTTGAACTATCTCTTCAATCATGCC
GTCGCTTTCTGCACTAGCTCCTCTCGCGGGCATTGTTGCCAGTATTCCTTCTGTTATGGC
GGGCTTTGATCCGACCTCCCAGAGTAATGTTGCGGTTTATTGGGGTGAGCTTACCTGAAC
TTCTCTAGCATCATCTGCGAATTTTGTATTAACTCGAAAAAGGACAAAACTCATACGGAC
AGGGCTCTGGAGCTTACGTTCAGCAACGGCTTTCATATTATTGCCAAAGTAAGTTGCCTC
TGCCAAATTTTACATACTAGCAAAGCTAACATGATAAAGATACGGAAATCAACGTACGGA
AATGCACTAATAAAAATCCCGTTTAATGTTCTGACCAATATTGTAGATCATTCCACTCGC
TTTCTTAAGTTCTATCAATACCCCAACACTCAACTTTGCCAATCAGGGAGACCCATGCAC
GGTAATCTCAGGATCTACATTATTTTACTGCTCAGAGCTTGAGTAAGTACAAATTCTCAA
CTTCTATTGAGCACCTTATCTAATCATCCAATCTAGAGCCGATATTACAACGTGTCAAAA
AACATATGGCAAGACAATTATGCTATCAGTTGGCGGGGCCACATATACCGAGGGCGGCTT
TACATCAACACAAGCTGCTACAAGCGCTGCAAATAACCTTTGGTCATGGTTCGGACCTGA
TACTTCAGGCGATATCCGACCTTTCGGAACTGCTGTGATAGATGGTTTTGATTTTGACTT
CGAAAGCACGGTATCCAACATGCCTACATTTGCAAATCAGCTCCGCTCGTTGATGGATAC
AGATACAACCAAAACATGGCTTCTATCCGCTGCTCCACAGTGTCCTTACCCTGATGCCGC
AGATGGGCCCATGCTTGATGGAACAGTAGCGTTCGATATCGTCTGGGTGCAATTCTACAA
CAATTACTGTGGCGTGCAATCATTCGTCCCCAGTGCATCAATACAAAACAACTTCAATTT
TGACACTTGGGACAACTGGGCCAAGACAGTATCACTAAACCCTAATGTCAAGGTTATGCT
GGGCATACCATCCAACACTGGAGCTGGAGCCGGGTACACTTCTGGGGCTGCCCTTGCAAG
CGTCATCGCATACTCAAAGAGTTTCTCCAGTTTTGGAGGCATAATGATGTGGGATATGAG
TCAACTTTACGCAAATGCCGGATTTCTCGATGCAGTCAATGCGGATCTTGGAAAGCCAGC
GGTAACGGTACCAGTAACAACAACCACCGTTACTAGAACTGTTACTAGCACCACTACTAC
CACCACTACTTCGACTACCACCTCCGCTACTACAACGTCTCCAGGCTCTACCCTCACGAC
CATAACAACAACTAGTGCCAGCCCTACTTCGACTGGCGGTTCACTTGTTAATGAGTGGAA
CCAATGTGGTGGACAGGGCTGGAATGGAGGTACTGTTTGCGTTGCTGGCACAAGTTGCGT
CGCATATAGCATCTGGTATTCACAGTGCAATCCCAATTAAATTCCAGTCTAGCCATGAGA
AGAGCAATGTTCGAGCTTCAGTCTGTCATGAAGATGCAGCAAGAACGTTATTCAACCCTT
TATACCTGTATATCTCCTTCGGATTATTTCACATATTTTCAATCTATTCGATTCTTTTGT
ATATACTTGGAGTCGTAGGCTTATTAAACGGCTTGTTGGCTCCCTAGCTCGATCAATCGC
ATATATTCCATAGATGGGGAGAGTGGATGACGTATCTTTTTCCTTTTTCCTTTTTTCAAA
TAGAACTTTTATTAGGAGCTTATTATATACCAATTTATCAATACTTCTTATTCATGTATA
AATTGTCCAGATGAATTACT
>744db7ce-d1f9-4820-ac6a-7afecc73028f (mRNA) 1435 residues [Bfab07:332891-334325 - strand] [genomic] name=Bfab07g00900.1
GAGTTAAATACTACCACTGAAGTCTCTCATATAGACCAACAATTACCTAGACGGATGCCT
CCGCGATTGTCTACGCTTTTAACAAATGAATTCGAAGGATGCGCAAGTCTTCCAAGAGAA
GGGCGTCCCGACCGTCCCGTGATATTCCATTTCATGAGACATGGACAAGCAAGTCCCACA
AACTATAAGTGGTACAGAAAAGAAGCTGATTGCCACTTCACAGGCACATTCCAATGTCGG
AGATTTCGAGAAGCGTGCCCAGATTTGTGATCCTAAGCTCACATTCGACGGAATAAGACA
GTGTGAACAAGTTAGAACTGTTCTGAACTCAAATCGCAACATTCGGCAGATCTTTTGTTC
TCCGATGACCCGCGCTATCGAAACCACCTTAATTACGTTCAGAGATGTAATGAAATTCTC
GATGGAAAATTCAGACATCCAAACTACGGCCTGGGATGCACTTCGTGGTATGAAAATTTG
CATTATTCATTGTTCTAAGAATGTTGACTGATTTTTATTTCGCTAGAATGGGGCTCTATC
CCTTGTTGTACAGGCAGTTCAATAGCCAAGCTACAAGAAGAGTTTGGCCACAAAATGGAC
GTCAGTCTCATCAAGCCTGGTTGGGAGCACAACAAAGAGATTTTCGGCGATATATCTCGG
GCTGATAAGGTCAAGCAATCGCTCTTCAAAATCGCTAAGAACGTGCAAGAATTGACACGT
CTTGGCGTGATATATGATATCAGAGACGGTAGCTTCTCGATACGTGGCCAATATTATGCG
CCATACGAGATTGTAATTGTGTCACATGGTGGATTTTTGGAAACGATGTTGGAAGCAGAA
TTGGGTGGCAGTAAGTTCTTCACTCTATATTCTCACATAGACCTTTCCATGAGAAAACAA
ATTTGGTGGTCTGCGAAAGCTTCAGCGGGTACCGAGTATTGGACTTTCCTTCTATCTCAA
ACCGGATCATACTATATTGTTTCATTTTGAGTCCTCGAATGTAAACCAAACTCAGCTAAC
TTGATTCATTACAGAAGCCTCTAAATTTCCTTTTAGAAATTGTTTCCACAATGCGAACTT
GAAGTCTTTCTCTTTCGAAACCATCAATGGTCCCGGCGGCGTTCGATACGGATTGGTCGA
AACAAAAGAGAGCAAGATGAGGAAATATTCTCGTAACCCGATACCCCTAGGCTAAAGTGT
GCTATCGCAGGCTCAACGAAGGATATTAATTGCACCTATGATTCGAAGAGTACTATTAAT
GATACACAAGAGGTTCTAAAGAGGCTCTAAAGAGGCTTTAATAGCAATATCGAGAGTTTC
AAGCACCTCAACGCTTTTGAAATCAGCGGTGGATAGAAGACTACAATAGCCTGGTTATTT
TTTTTTTAGCACATGTAAACAAAATAATATGATCTAAAGCAAATATTGAGCCCTC
>1fdb4ec4-c0a0-4a95-b110-194ead14c694 (mRNA) 1643 residues [Bfab07:335644-337286 - strand] [genomic] name=Bfab07g00910.1
TGTAGGTAGTCATATACTTATGTAAGGAAGGTGAAATGTTTCTTCATCTCTCGTCTCTGA
ACCAGTACCATATAAGGATCGAAAACGCAGTAGAAACTTCATATGTCGACTGGATTGGAA
TAGATAGTTTGTCTATAGGTAACGGTCATGCAGTTTGAAACACCTGGCAGTGATCTTCCA
GGTGGAACATCATCAACACACTGATAACGCAAAGAGAGGATGTCATCAGCACTTTTCAGC
TTTGCCGCTTACTCTTCATGTTTACCCACGCTGTTCTCAAGATTCAAAATATAGAAAGTG
AATGACAGCGGAAGTTGTCCTGCCGTTGCTTGCTTAAGCGAGCTTTTTCGCCGGGAACAA
ACCGTAGGTAAACAGACCTTCCAATTGTTTCTTGCTTCCCCATCAACAATACACATCCAA
CATTTATCCACCATCTCATGCAGCCACTTAAGAAATAAGCATGGATATGTCTGCGAAACA
ATTTCCCTCGTCCATGTTTCCATTGAAGAACATGGAAGGCAACTCTGTTCAGATCCAAGC
AGAGTATGCCGACCGCGACCCAGACAACAACAGAATTCAGACTGCTTCTCTCAAGATCAA
CTTACAAACCCTCAAGGTCAGCAATGGCTCCCCAGGTGAGATGGCACTTTGGCTATAAAA
TTTGTTCTCATTTATCTGACAGCCAAATCAGGAAATAATAATCTGAATGATGATGTCGAC
ATGTCAGGCCTCGATCATCCCGTTGGCGGAATCATAAACAATTTGAAAAATCGCAGATCG
AGGCATAAATCACACTCATCTATCAACACCGGTCAGATTCATCAGCAAGCTCAGATGGCA
CGCATGTTACAACCCGCGATCCGAGCACTTCAATCTGCCACTGACAAAGCTATCAACAAA
AGCAAAAAGATCTCAAGCCAAGGTGAAGCCTTCATAGGACCAATTTTGCCAAGTAATGTA
AAGAAATTGCGACGTAACCTTGAAAGCGATTCTTCCAGAGTGAGAAAGGAGAATTCCACA
GAAAAGAAACGCAAACGAAAGGAAAAGCGCAACACTGTTGTCAACGCACCCAATACAAAG
CCGAAGAAAGAAAAGAAGAAGAAGGACCAGGCTGTTAACGCTAAAGCCAAGCCGTCGGAA
GGTGCTATCAAGAAGCGTAGGACCAGAAAGTCGAAGGAGGGGAAAATGGACCACATGGAA
TATCTGATGGAACGTCGCAAGCTTGGGGATACGAAAGCGCTTGTGCTTGCCGATAAGACT
GCTAGATCAAACGCGGACGAGAAGGTGGATCTCTACGGTCGTGGACTAAACCCCGCAGAT
TGGGAGGCAACGTATCAACAGGAATACCAGGCCCGTACTGAAAGGCTTAGAGAAAGACAA
GCTAGGGATGAGCAAGCGTTGATGTCGGCGTTGAGCGGTCTCTCTCTTGTTGGAACAAGA
ATTGGCGGTGATGATTATGATCTAATTCTCTAAGTCTAAGAAACTTTATCCAGGGAATAG
TTTTATGGACTTTGCTGAATTTTAGTTTAATATGATTTGGCAAATCTGCAGCATGGTATT
GGGATTTCTTTTGAGCAAAAGCTTTTTTCTCCGGTGTCATTATAGGAGGATGGCCATTCG
TTCCTGCTTGCTCGTACACAGAT
>1741806a-cfcb-469c-9184-7deb41e15b08 (mRNA) 1540 residues [Bfab07:337922-339461 + strand] [genomic] name=Bfab07g00920.1
TAGTGAGCTTCTGAATCTCTCTTATGCCGCGAGACATTCTGAATTCGGTAAAATTCGACA
GATAGAGATCAAAGATAATTCTTTGCACCATCGATCGGCAGTATGACCAAACCGAAAGGA
GGCGGTAAATACGATGGGGGGTTAGCGTGGAAATTTGGTGGGGGAATGCATGGACCACAA
TATCCAATCCGATCGATATCACTCCCTCCAAGCGGAATTAGATGGAGATAATAGAATGTC
TTCGTGGAGATATACTGTAATTACGAAGCTCAATGTGAGGTATCAAGCGTTTGCCTCAGC
TGTGTTTGACCTGACTGTCTTTAAACACACACATATATATCCAGTGGATGATCCGTTCCT
TATTGTACACATCACATCCCACTTCTTCCCACACATTTCTCTCTCTATAGAAGCCTCAGA
GTCATTTCATCGCGACAATCATGAGCAAAATTCAACACATTTTCATGACCGGAGCCACTG
GCTACATCGGATCTGTCATAACTGAACTTGCCATTGCAGAAGGCTACACAGTCCATGGAC
TTTCTCGATCTGAATCTGGAGATGCCAAGTTGCTCAAAGCCGGCGCCGTGCCGATTCGAG
GCAATCTTACTAACCTCGATGTTCTCCGTCGCGAAAGTGCCGATGCAGATATTGTCCTCC
ATCTTGCGACTGATTATCATATTACCAAAGCCAACGCTAGCTATGATGCCGCGTGGCCAA
TTAACAAGGCGGCAGTTGAAGCTATCGCAGATGGATTGGAGGGTTCCAATAAGCCACTTG
TTGTGACCGGTGGTACATTATTTGTCTCGCCAAATCCAGATGGTGGAGAGACTACGGAAA
CTTCTCCGGTAGATCCAGAACCTATCAATAATCGTCATCAAGCTGAAGCTCATGCTCTCG
AGCTGGCAAAGAGGGGAATCAGAGTTATCGCGATACGATTGGCACCATTGGGTTTTTGGG
AGAGGGGGCAGTGGAGTCAAGCTATTCACGGGTATCTCCAAGCATGCTGGCGAAGTGATG
TGTGTAGATGGAGGCAAGAATCTCACGACCACTGTTCATATTGATGATGCTACACGACTC
TATTTGCTGGCTGCCCAAAAAGCAAAATCGGGAGAAGTGTTCAATGCTAGCTCGGCTACG
GATGTTACTTTCCATGAAATGTGGGAAACCATAGCCACGGCATTGAATGTGCCATTGAAA
CATCTTTCTACTGAGGAAGCCATCGCTAAGCTGGGTTCGATCATTTCAAAATTCATCTCG
ATGGAGAATAGGGCAACGGGGGCGAAAGCTAGAGATATTTTAGGTTGGCAGTCCAATGGA
ATGAGTATATTGGAGGAGATTTGTTTGACCTGTTCTCAAAGTCAGGAAGCTTAGTGGCTT
TCTAGTGATATTGCAATGGAATTAGTGTGCTGAGTATAGTTACGTCTAGCCATAAATCAG
ATTGTTTTGAGATCCAGGGGTGTACACAAAATGAGAAGTAGTGAGTGATAAACTTTAAAG
TGTTCATAATTAAGGGAGTAGGCTAGTGGAATGCATGTAT
>5c2139c1-6e59-4a02-a3af-1c166349146d (mRNA) 2417 residues [Bfab07:341954-344370 + strand] [genomic] name=Bfab07g00930.1
GAATCCACAGATAAGACACCTGCTGCTAGCGTATTAGTGAAGGTTGTTGATAATTCTTGG
CCATAACCAAGTCCCCTCGAACTTGCAACTCTTGATTTCTTACAACAATATCCACAACAA
CAACCTTGTGGATATTCCCTTTACAGAACTCCTGTACTATCATGAGATTTCGTTTCTCTT
GAAGTCTTTCAAACTTTTTCTTGCAATAAAGTTCTCTCACTCAATCAGATACTCTTCATT
CGTCCAACGGGAACTCGATTACTGAATCATGTCTTCCGACGGGGACAGAGAAGACCAGGG
TGAAGTGTCAAGCCCTCTTGACTCAAATACTATCGATGGTCAAGAGGTTAAAATTAAGGA
AGAGCCTTTCGAGGAAGATACTAGGGTCAATCAAGATATTCCTCTTTACGATCCAGCTTT
TCGTCCAGATCTCGAGAGCCAAGCTATGCCGTCTCGTTCCGAATCACCAGCTCTTTCAAT
TCGACTACGAAGACCTGGAAGAGCTTCATCTGAGATGCATGCATTCACGACAGCTGGTGT
AGCCGCTTTGACGAACAATCGGCTTTTGCAAGCACGTCTCAACAAGTTAATGTCCATGCC
GCACTCAGAAGATGAATTCCCTGATGATAAGCTAGCTCAAACTTCAGAGTCTCAATTCGA
TTCACAGGTCCACAATGCCGGTTATAGTCAGCCCAATCCTGCTTATCCAGCAACCTTTTA
CCAGCAATATGAGTCTCAACAACACCCAGCTCAATTATCAGGTTATCTTCAAGATCCATT
TTTGCCAGAGTACTCCAATCAGTTTCACGGTTCCTTCGATCGAAAATTTCCACAATCTCC
CTATGTCGAGGATCTAGATCAGACCATCGTAGTCGACTCGACCATGTCCAACTCCTCGGT
TCCTCCCGAAGACTTCTCCGCCAGTCCAACCCCTACTCCGCAAGAAGAAGTTTTCCTTGA
GAATCGAGCACCCTCTACACCTCGTGCAGGTCGTCAAGCAAAACGCGAGTCTGCCAAGTC
TAGAGCCCATGGAACTCGTACTGCTGGTCGAAGACTTCGTGCCCGACGTGCAGAAGATTT
TGCTCCTCCCCCTGGTGCGATGACTGCTGCCGACGTTATGGCTGTTCACGAAAACAACAT
TCGTCGTAGAAACAAGCGATACAAGAAGGCTGGCATCAAGCCCCCAGTCCTCGACGATAT
CGAACAGGACGTTGTTGACACACTGAACGAACTTGGTGTCCCGATTGACTACAACGACAT
GTATCTCCAACAGGTCTATTCGAATAGAGATACGACGCTCGATGGAAGTTTGGACGAGTC
TGCAGACAGCACCATAGATACTATGGATACCGATGAAACAATAGTACCACTTCCTCCTAG
TCTTCCTGCGGAACCTGATTTTCCAACAAGCGCACGCTGGCGAGAACGTGGGCCAAATGG
TCAGGCAAGAGCGAGATGGGGATCTGCTCGATTGCGGGCAAAGAAAAAGGTCCAAAAAAC
GGAAGCTTGGAAAGAAGCGACTAAAGATGAAAGAGACGCAATGGAAGCAGCAGCAGCAGA
TGCTCTCGTATTCATGTAAGTATTAGATTCGATCTTGAGTCAGATATCGATACTAAATGA
ACCATAGTGCAGACCCCATTCCAGTCGGCCCCGTACCACCAGGATCTCATGCACCATGGT
TACGATCAGAGAGAGCCTTTCTTCTACAAGAAGTGACCGAAAACAGCAAAAGGATCAATT
CTACGGGCAACAGATTGGCCGCAGTGGCCGAGACCTACAATCGTCGCATGCAATACAAAA
CCCAAAAAGCAGGCGAGCTTTGCATTGCTCCTGGCAACGGTGAATCTCGAAAGAATTCGC
GGTTAACAAAAGACCGCACTCCACCACACAGAACAGATGTCGCCATCATGTCGAGCATCA
AAAAGTGGTCGGAGTTGGGCGATATCTGTATATGCCGACAGCATCAGCGGTATCCTGTCG
GTGATTTTGAACGAAGTGGAGATTTTCCCCATGGTCACGGGGTTAAAGAATGCATACCTA
AAGATCGTAAGGATGATGCTTGCCATTGCGATGATCACCTTAGGGATTTTAATGGAGAGT
TCCCGCCAGGACATACAAAAGCACGATGCAGTCACCTTCTCATTCGATCGCACAAGTGAT
TTGATTCTAACTCTCTTTTCAGTGATCCATAAGAGGTCTTGTTGCTACTCATGTGTCACA
GAGTTGGCAAATATGTTTTGTCTTTGTTCTTTGGGTGGTTGGGCCTAAACTTTGCGGTGA
TCAGTTTGTATTGACAATCACTTTTATTTGATGGATGGAAGGAACGGTAAAGAAATATGA
GAGGGGTCCATGGTATCGTGGTTTTGGTTGTAACATGTGGCAACATTGGGTAACATTGAT
GCTCTTCTCAGTTTCCA
>82253d53-5f9e-46f6-b604-5178b0d10833 (mRNA) 4367 residues [Bfab07:349092-353458 + strand] [genomic] name=Bfab07g00940.1
CCCTTTTCCCTTCCCTTTCCCATTCCTCTTCCTCCTCCTCTTCCTCTTCCTCTTCCCCTT
CCTCTTCCCCTTCCCCTTCTTTCTTTTAAACCTTCGCTTCACAGCCGTCCTGTCCTGTCT
TCCCATCCGCCGTCTTCCCGTCTTCAGATCGCAAAGAAGCATCAACAACATCAATTTGAC
ATGCATCGTTCCCAAGACCACATTTCAACAGAGAGATAACGAAAATCTATAATTATCTAT
CCATTATCTATATATTCTTTACGAAAATCACCAATCTCATTCGTCCAGACGCTCTTACTT
TAATTACGTCACATATTTCTACGACCTGAGCTTTTGCTCCGGGAAATCTGCAACTTGGTG
GGTTGTTTTCATCAGAAATCAGAAATTTTGGGGACAGAATATTCCAAGGTGTGCCATCGA
TCCTCCATTGCCATGCTCCATCCATTCCTTTCATTCCAAGATTTTCCATATTGCGCTCTT
TCCTTCTTCCCACCACCGCACCCACGTTCCTGCTCGAAAGGATATAAACCAAGCAAGATC
TGGCCATTTATAGAAAGAGACAGGTCAGATTGGGAACGAGAGACAACAGTTCTTCATTCT
GCCAAAATTGATTTGAGAGATTTTGGACCGTCAATCACAGTTTCACAAACCTAATACTAC
CCCTCCATTCACATAATTGTCCGCCCAAAAAAGATCCTGCCTACCACCATTCAACTCCTT
TTCCCCCAGCTCTTCACTCTGTTTGAGACCTACTCATTCTTGACCTTTTCTTCTACAAAT
ACCTGCAATACCATTCCTATATACACTTTGACTTATCATTCATCATGGCAGAGAATACCA
AGGATTCGTCAAGCTCAGGCTTCGCCGAGTCGTCAGCAACAGCTACCCCTCCACCACAAA
GACCAGCCGTTCTCAAGAAGCAGATTACGCGGCACCCAGCTTTAAGTCCATCGATTACGA
ACATCCCAGTGACTCCGGGTGGCTATTTGGGGGCATACGAAAAGATTGAGGCAGAAGATA
AATCTCTCGAGATTGACGAGCAAAATTATTTTACCCAAGGCTTTAACCAATCCTCAATCA
TGGCAAAATCTCCATCCGATGCCGAGACTGGCACATTGTCGAATCAAGAAGTTCTTCGCA
GGATGAGTTTGGCTCCTGGTCGCGAGAGACAAAACTCCTTATCGGACCTTGATCCGCGCG
CGGCGCATCCTTCATTAAATTTGACGGGAGGAATCATCTCTGCGACATTTTGCATACAGC
AATCTTTGATGTACAGAAAAGGCTCCGATTGGGTGAGTGAGGACACACGGTTTTGGGGTA
TTTCGAACTAACCATCGCATAGACATGGTCGCAAAGACATGGCGGTTCTTCGCAATTCGA
CTCTTTCAGATACCTTGCATCGGAGAAATCGCCCTGGCATCATACATTAGTTGGCTGGAC
TGGCGAAATCAACCCGGTGGAGGATCTTACCCCTCCAGATACCCCTCCTCTTGGAGGCCA
TCCTATACAATCGCAACCTCCACAAAATAGGGTTCCTTTCAATAAGAGCTCTGCGCCAAT
TCCAGTTGATGGTGTTACCATGCCTCCAACACCACCAGAGACCGATGGATTATTTGTTAC
AAGTGACGATAGGCAACGACTGGAAAGACAACTCGCACATCAACCACATGGAAAGATCGT
CCCAGTTTGGCTATGTGATGATGCAGATACGAGTGAGGACGGAAGTGTTTGTTTGAAAGA
CCAATCAAGATGGAGAAGATTCGCCGAACACGAGTTATATACTCTATTTCATTACAAACA
ACACGAACCTACGAATGGTCGACAAGAACGACAATCATGGGCGGATTATTATCGAATGAA
TCAGAAATTCGCAAACCGAATTCTCGAAATTTATAAACCTGGCGACATTGTCATGGTTCA
CGATTATCATCTTTTGCTTCTTCCCAGCATGTTAAGACAACGGGTTCCACATATGAGCAT
TGTCTTCTATCTACATATCCCATTTCCCAGTAGCGAGTTCCTTCGCTGTTTACCAAGAAG
AAAGGAGATATTGGAGGGCGTACTGAGCGCAAATTTGGTCGGACTACAATCATTCAGTTA
CACGCGACACTTTAATTCTTGCTGTACAAGAATTTTGGGATTCCCATCTACGAGCGCGGG
TGTCGAAGCGTATGGTGCGAGATGTGATGTAGCGGCTTTCCCCATTGGAATCGATGCGCG
AAACGTTGAGCAGCTCGCTTTTAATGATCCTGCTGTTGATGAGAAGGTTGCTGCATTGAA
GAAGTTGTATGCGGGCAAAAAAATCATTGTCGGTCGAGATCGTCTTGATAGTGTTCGAGG
TGTGGCACAAAAGCTCATGGCCTTTGAACGCTTCTTGGAAAACTTTCCAGAATGGCGTGA
GAAGGTTGTTTTGGTACAAGTCACCAGTCCAACTAGTGTTGAAGAAGAGAGAGAGGATTC
AGGAAATAAGATTGCAGCCAATGTTGCCGAACTGGTTGCGAAAATCAATGGTCTCTACGG
ATCTTTGAGTTTCTCGCCCGTCCAACACTATCCTCAATATCTCTCTCAAGAAGAGTATCT
CGCTCTTCTTCGTGTGGCAGATGTTGGTTTGATCACTAGTGTACGTGATGGTATGAACAC
AACAAGTTTGGAGTATGTGGTTTGTCAAAGAGAGAATCATGGTCCTTTGATTATCTCTGA
ATTTTCTGGATCGGCCGCAGTCTTGGATGCAGCCATTCACATCAATCCGTGGGATTTCAA
TACTGTTGCCGAAAATATTCGACTTGGATTGGAAATGCCTCCTTCCAAGAAAGCAGAGCT
TCACGACAAGTTATCCGAATATATCTTCAGTAATGATATCACAACCTGGACCAAGAGCTT
CATTCGAACATTAATCACAAAAATTGGCTCCAATAGTCATGCTTTCGCAACACCCCTCTT
GGATAAGACTTCTCTGTTGCTTCAATACAGAGCCGCCAAGAAGAGATTGTTCATGTTCGA
TTATGATGGTACTCTTACCCCTATCGTTAGAGATCCTGCTGCAGCTTTACCTTCTGATAA
ATTATACCGAACCCTGAAAGCACTTGCTTCCGATCCCAAGAACGCCATTTGGATTATTAG
TGGTAGAGATCAAGAATTCTTGGGACAACATCTGGGACATATTCCAGAATTAGGATTCAG
TGCTGAACATGGTAGTTTTATGCGTCATCCAGGTAGTCAAGAATGGGAAAACCTTGCGGA
ACAATTCGATATGGGTTGGCAAAAGGAAGTTATGGAATGTTTCCAGAAATATACTGAGAA
AACTCCAGGTTAGTATTTCCATCGAACAGATTCTCATTGAGTTCTAGCTAACAAAATTAG
GGTCCTTCATTGAGCGCAAGCGTTGCGCTTTAACGTGGCATTACCGTCCTTCAAACCCAG
AACTGGGTGAACGCATGTCTCGTGAATGTCAAAAAGAACTCATGGCCACCGTTGGTAAAG
CTTGGGACGTCGAAGTCATGACCGGTAAAGCAAATCTCGAAGTTCGTCCTACTTTCATCA
ACAAAGGATCAATCGCCAAACGTCTTGTTGATGCTTATGGTAAAGAAGTCGGACAAGCTC
CCGAATTCACATTTTGTGCAGGTGATGATACGACAGATGAAGATATGTTTAGATCTTTAA
ACAACAGTGAATTGAATGTAAATCACGTTTTCACCGTTACTGTGGGCGCATCAAGTAAAC
CGACATTGGCTCAATGGCATCTTCTGGAACCGATGGACGTTATCAGTAGTATTGCACTCC
TTGGGGGAGGTGATACGAACGTAGCGGACCTGGGACCGGTTAGTGTTATTGAGGGGAAAT
CCCGGGAGGATATGATGGGAAAGATTGAGGCATTGGATATGATTCCTGGGGCATCTAGTA
CAGGTGAGGGAAGATAGGTTACCATGTCGGGTGCAAGGAAAGGACTGTTGGGTTTGAATC
TTTTTCAGGTATGGGCATAGCGTCGGATGGGATAGGTCTTAGAATAAATTATGAATGGTT
AGAAGGATTATGAAAGGATTGATAGGATGAATGGGGTAGATTTGGCAATTGGGGGAGTGA
AGATACATGGACATAGGATAGGATAGAGCGTTGACGAAATACGATACGATGCGCTGTGAA
TAGGGGTGATAGGATTTTTGAACATGCGGATACCGAATAGAATAAGCAGACACTTATGCA
TGTGTAGATGCATGTTGATACAATGAAGAACTTTAATCATGTTGGATGTATATTTAAGTA
TGTAAAGACTTGAATGATGGAAATTTTATATTTATCTAGGTACCCATCTGATTATGGACT
GACTGGAAGGACATTCATTGTGCTTTGAGATTTGAGATTGGAGATTT
>3e67fd56-998e-4a26-a2d5-f8aa2b6107f6 (mRNA) 1644 residues [Bfab07:355394-357037 - strand] [genomic] name=Bfab07g00950.1
ACATGAACACAATCCTTCAGTATCCACCAACCCAACTCGGCTCTCGAAACATATTTCTCG
AATCTGATATCCAATTTTCTCGCACGCTATATTTACTTACCCATTTCAGCTAATCTCACT
CCCTAGTCATCTAGATCTTTTCTCTTCTCTTCTTCGATCCCATAATCTTATCATAACATA
TCAAATCCATTCCACCGACCATGTCTCAAGAAATCGACATTGACCCCAATGCATACACCC
TCCCATTCAGCCTAACAAAGACCATCCGTCGGGACCCCTATCCCGCCATCCTCCCATCCA
ACCCAAGTAATTCTCAAGCTGGAAAAATAATCGTAAGAAAGACCGACCCTCTCTTTCCAT
GTTATATCACTTCATTTCTCTCTCCCCGCATCAAATCAGATGAAGCATATCAAAACCGAA
CACCCATTCCTTTCCTCCTAACATATCCTCATTCGCAAATTCGCTAATCCCCATTCTCAC
CACCAGCTCATCACAGGCGGCGGCACGGGAATCGGTTCCTCTGCGGCCCGCGTCTGGGCC
CACGCATCCGCGCTCGGCATAATAATACTCGGACGCCGCATCGAGCCACTCGAAGAAACG
GCTCTCCAAATCCGAGCCATCAACGCCGAAACCAAAGTGCTAGTTATAAAAACCGATGTG
AGCATTGATGATGAAGTGAAACATGTATTTCAGCAGACCCATAAAGTGTTTGGGAGAGGT
CCGGATGTAGTTTTGCTTTGTGCGGCCGTATTGGAGCCGTCGAGATTGGTGCATGAGATG
GGGGCGGACGAGTGGTGGGGTTATATGGTATGTTTTTTTTATTTGTTTGTTTGCTTCTTG
CTGTGAATATATGAAGATATGAAGGGAAAGCTTACACAAACCTATCTACCTACCTACTAG
GCTATCAACTCTAAAGGCGTATACTCCTGCATACACCACTACATAAACACGCAATCCAAC
CCCGCCCACCCCACCGGAACAATCGTAGTAATGAACAGCGCATCGACCTCCATCCTCGAC
ATCCAACACCCCGCCAACGGAATCGGAAAACTAAGCGCACAGCGCCTCGTCGAATTTGTA
GACGCCTCGTATCCCACTCTCCGCATATTCTCTCTCCTCCCAGGACTCGTCGCCACGCCC
AGTCAACAGCCGCAAAATCTTCCGTATGCGCGCGACGATCCCGTAATGAGCGGGATGTTG
ACGCTGTATTTGAGTCAGGCGAGAGCGGATTACTTGAGAGGCAGTACCATGTCTGTGAAT
TGGGATGTAGAGGAACTAGAACAGTTTCAAAAGGAGATCAGAGAGAAGAATTTGTTGAAG
TTGAGTTGGATACCTATTTTGCCCATTGGTGGGGGGAAGGGTCTTGCGATGTGAGATGTA
TTCGAGTTATCCACCGGGATATTATCATATATTTTTTTGACTAGAACACTGGAGCTGGAG
CGCTAAAGCACTACCAGTGTAACATGAGATACTTCTAAACACTGTAGTGGATGAACACTC
ACCTTAAAAGGTCGAAGACAATAGAGTCACTGGAATCTCCTGATGTGAAAAACTTCCTCT
TCCATTTTCAGCACATCCAGATCCAATCTAGCGTCTAGCCTAGAAGATGAAGCTTTCTGC
TCACAAGTCCTTGATTTCCACGAG
>c922dbf9-b65a-4444-b354-bef0e530b8d4 (mRNA) 1833 residues [Bfab07:357887-359719 - strand] [genomic] name=Bfab07g00960.1
TCTCTTGAATCTCTTTTCTTTTAACAATTCTCGGACCCAGTTTATCTGAATCGGTACTGG
CCATCTTCCAAAGCACTTCTCAACCTGGACTTCTCGACTCCGTCAAATCCGGGTATCTCT
CTCGGTTTCATCATAGAGTTTCCTGTCTTCCGCGGTGGACATGGAAGGGAAAAATGCGCT
GCTCGGCACACCAGTGGCATTCACCATTTTGGCCGTCATTGCTGTTGCCATTCGCTTTTG
GGTGCGCATTACACATAATGCTGGGTTAGGATGGGACGATTGGCTTATGCTTATAGCTAT
GGTAAGTGACGGCAAATACCTTCCCCAGAAACCACGACAGACAGCACTCACGATTCTTTC
ATATAGGTAGACCAGATTGTCGCCCGTGTTTTAACCACCATCTCGATAGCGTATCAATTT
CGCAACCCCCCCAGCTTTCAAGACCAGGTTAATGCGTTGAAATATAATTACATCGCGGGC
CCACCTCAATTGACAGTCTCTGTCATCGCAAGACTGTCGGTCACCATCTTCTTGATTCGC
TTATTTGGTGTACATCTTTGGTTGAAGAGATATTTGATCGTCTTGATGACGATTTTGAGT
CTGCTTACAGCGGGTGTGATCATTATCTCTTTCGCCCAAATAACTCCGGTTCAAGCTATT
TGGAACCCGATGGTACCTGTGACAAAACAATGGAATCCAGATCTTTGGCTGTATTTTGCT
GTCTTCAATCAAAGTGAGTTGTAGCCGTTTGTGCCAGTGCGTTAATTCAACAAAGCGTTC
GCTGATTATCATGAAAGCTACTTCGACACTTTCTGATATAACCTTTGTCTTGTTCCCGGC
TTTTATTATTTGGCATTTGTATGTACATTCTAAGATTCCCTGTCCTTTCTTCACAATCAT
TTCAAAAATCTTTACCTAACTGTTTTCCACTCCTAGAAATATGCCACGACGCCAAAAATT
CGGTCTCATCTTTCTCTTGGCACTATCACTCTTCGTCATGATCATGTCAATCTTGAAAAC
CGTCTGGGTAGTCGATTCATACCACGGCAGCAAGACTCTTGAGCATTACAACCAAACCGC
GATTCTGACACTCGGTCTCTTGGAAGGAGACATGGTCATCATCATGGGATGCATCCCGAC
ATTCGGGCGCTCCGTCATCGACGCTAAATTCTCTCTGCTATGTCCGACCATTTTAATTTA
TTTCGGCAAATTCAGATCTACGAGAGATGCATCTACAGATAAAGACAAGTCCGATAGATC
ATACCGCACTTCTTCTAATCCGTATGAGAATTTGGAGTTGAGCTCAAGGAGGTTACCTCT
CAATTCAGATCATAGTCTTGGAAACACAAAGTCGGCGGAGACACGCACGAAGGATATAAG
TCAAGATAGATTGGTGAGGGAATATGAAGTATAGACATCTTAGCGAAGGGGAGTTCTCTT
TCGCTTGGAATGGAAAGACGATGTAGTATGAGTTGATTGTATGAATTGATTTTAAGCATT
GGTGATTTAGAAGAGTTGGAAAAATGGTACGGAGTATGATATACGAATTTATTCTCAAAA
GTCAACAGGTCCCACAGTCGATTTCTTTACTTCGAGGATTGAACTTGTTTAGAGGAAATT
GCTTTTGGATTCTCGTCTATTAACTGCCTGAAAACTTCACACGTTGTATACACCGCAGAC
AATTACGGTACAACTTACTAGCATGCAAAATAAGCCTTGTTGTAAATTACTAAAAGAAAT
CCAATATATTTTGAGTATTACTTGACGGGCCTTCTGCTCAGGAATTACTGACCAAGACAT
ATATATAATATAAAACACAAATTTCCACAATAC
>c9310b51-c711-440d-894f-7568a6645869 (mRNA) 2413 residues [Bfab07:360206-362618 - strand] [genomic] name=Bfab07g00970.1
TAGATCACTCCAGACGAAAATTTTGCTGACCACCCTCTTTCATATTTAAATGCATTGAGT
TTGAATGGATCGTCCAGCGCTTATGCTGACAACGATTTTGGTTTTCCCACAGACAAACGC
CACACGGATTTGCAGCCGGATGAGTCCTGATCAGAATGTGGATGTGAGCCAATGAAGGGG
TATATAAAAACATGCCACAGAAAAAGCCGATGCACCTTCTCGTCTTGTTAGAGTACTCCA
TATTCTTTGCGGAGTGTAAAGTTTTGAGACTCCAAGGCTCGAAATGAGGAGAAAAATAAT
AGCAAAGTCTCCGCAGACGCGTGCATTCTAACACTCAACTACGATAGAATGCTCATTCAA
TACTGCCGATTTCTTACAGAGTAATTTTAGATCTAAGAGCCGCTACTCATTTCCTCTTCT
GAATGACAATAGCAATTATGTCTTGGACAATGGGCACTCAATTACTTCTATTAGTTTTGT
TGATTACAGTTATCACACTCTCACGGCTTCTTTTTCACACATTCTTCCAAAACAAGGACG
AAGTTGATGTATGGAGCAAAGTTGAACCCATTGGTGTCTCATCCGGCGGCATTTTCTCAT
GGACTCGTGCTGTAATCGGATCCGCATTCTCCTATCAGCAGAACACGCAAGATGGGTACG
ACAAGTTTTGCAAAGCTCAAAATCGGCCATTCATTCTCCCTACTATGTGGACAGGAGGCT
CTGTAGTTGTGCTTCCACCATCGTTACTACATCTAACCCAGAAGGTCTATCCTTCGATGG
CTCGCCATCAAGCCAAAATGGATCACCTCCAGCTACCTTATATGATTTCCGACCACGATG
TGATAGACAATCTCATCCAATTTGATATTGCTCGCAAGAAGCTTAGACAAGCAGAAGTAG
TCAGCTCCCTCGCTGCCATAACAGAAGAAGAAATTGACGTAGCATTCCGCAAATATTGGG
GAACCTCTGAAACGTGGACGAGCATAAATGCTTGGGACAATTGCACACGAGTTATCACGC
AGGCCGGATTCCGCATTCTCATCGGATTACCTCTTTGCCGGGATGAATCCTTGTTGGAGA
ACGCAAGGATGTATGCGAATTATCTCTTTAAAGGAACATCTATCATCAACTGTCTGCCCC
CCTGTTCCAGGCCAGTGCTAGCGAGAATCATATCATGGCCATCAAAGTACTACCAGGCAC
GTTGCCGAAGAATACTTAGGCCGTTGATCGAGCAGAGGATCCGTGGATTCCAAGATCACA
AGGCAGGGTCCGAAAAACCGGTACATACCTAACTGTAAAGTACTACGTGTCGTTACTGAC
GGACAGCTTTAGGATGATTTTCTCCAATGGTTAATTGAACATTGCAGTAAATTAGACGCA
AAAGAAATGGAACCCGACAAGATTTCTGACCGAATTCTCGTCTTGTGCATTGCATTTGTC
TTTGCAATGGGTTACATTTTCTGTAGTTCTGTGCTTGATCTCTACAAGAGTTCAGAGAAG
ACCTCATTTGTCGCTGGATTGGTTGCTGAATGCAAATGTGTATCCGCAGAGCATGGAGGC
TTGTCGACAAAACAAGCAGTTGACAGCCTATTTCGTGTCGATTCCGCGTTACGCGAGTCC
ATGCGCGTTTCTGATGTTGGGGCCACCAGCATTCCAATAGATATCGTCTCAGGCAAAGTC
GACCTCGGTAACGGAATTCAGATCCCTTCAGGCATGCGAATGGTTTTTGCTACACAGCCA
ATGCACCTCGATCCCGACTCCTACCCAAATCCTCTGCGATATGACGCTTTCCGCTTCTCG
CGAAAGTATGAGGAAATAGAGAAATGCGAGCAAGAGCTTGGCGAGCGAGAACTTTGCACC
ACTATCACCGAATCCTTCCTGCCCTTTGGATATGGGAAATTTCAATGCCCTGGACGCTGG
TTCGCCACCCAGACAATCAAGCAAGCTCTTGCTTATGTTGCCATGAACTATGATATTGAG
TTTGATGGCAGGCAGTATAAGAGACAAGCTTTGCTGAACATGATGCTACCGCCTGAATAT
GTGGAAATGAGTGTTCGTCGTCGAAGGGCATGAGTTTGGCGTAAGAGCTTCGAGAAAGTG
TTATCTGGTGATAGTTATAAATTTCCGTAGGAAGCAACTTGAACAATAATGATTTGTTCC
TTTCATTCAACAGTGCTCATTCTATCTACGTTCTATTAGATTGCACACTCTGCTTGTAGC
TTCGAGGTTCTCTCAGTACTAGGATCCAGATCGGGTCCAACATACGATTCAAAGAATCAC
TGTAACACTGTAATTTGAGACCAGCAAACTCGGCCGGCCTTACTGCTCTGTGCAGTCAAC
AAGATTGGAAAATTCTTGGCTCCGAACGTTGCATTTAGGCATGATGTATATTTATCAATA
GGTAACACGAGCT
>d3d8b4f0-79fc-4860-a793-91c714a277fd (mRNA) 2690 residues [Bfab07:363042-365731 - strand] [genomic] name=Bfab07g00980.1
GGGTGGCACTGCTTCCAATCTGAAATTTTGCTTGTAAAGTAGCCTTAACCTTACCAATCG
AAAAGAAAAGTACCGAGGGTGTAGTTTGGAGTAAAAGACAGCATGGCCAGCCGTACAGCC
TGTGTAACCACACAAACGGCAATGCCATACCTTCAACGCTTCTTTTTTCTCTCCTAACAA
CTTCTCCTCACAGTGAATTCATTCTGTGCTCTAGCAACAAGAGCCACGAAGAAATACAGG
ATGGAGAACACTGCGACAAAATCCTCATCTCCAGAAGATGACGAGAAGACAGTTGAACGA
AACCCTAGCTCCAGCGATTCCAAAATCGATGGCTCTAGACTGAGGTTAGAGACTAAACCA
GTTGACGAGGTTGAATACCAGGTGGAATATGTATCCGGAGTGAAGTTAGCAATTATTATT
GCAAGCGTCGCATTTTCCTGTTTTCTTGTTCTAGTAGATAATATGATCGTTAGTACGGTA
TGCTGTTCTCTATTTTCCATTCTCCAGATTTTGTCTGATCTCTTGACATACAGGCTATTC
CGCGTATAACTAATCAGTTCAAATCTCTCAGAGATGTTGGATGGTACGCCAGTGCATATC
AGTTTGGAAGGTATGCTATCCTTTTTCATTATTCAAGATAAAGCAGAAGAATCAAGAGCT
GAAAATCCTCCAGTGCAGCTCCACAGCCTTTGACAGGCAAAATTTACACCCATTTCAAGA
CGAAGGTATTGTTGTCTGAAAAAAAAAAACGCATTATTTTTGCTGACAAGATATCTAGTG
GGTCTTTCTGACCTTCTTCTCAATCTTCGAGCTAGGATCGCTTTTATGTGGTGTGGCCAA
TTCTTCTGTTATGTTGATATGCGGCAGAGCCGTCGCTGGTTTGGGCGCTGCCGGCATTCT
AAGTGGTGCTCTTACTATAATTTCTAGCTGCGCAGCGCCAGAGAAACGCGCAAGTATGTA
ATGAACATCTCCTGCGGAAACACTCACATGATTATTTGGAACTCAAGGTTGCTGACTTTA
CTTCATAGATCTAATTGGGATAACTCTAGGCCGTGAGTGCTCTTCCGCCGATATAAGACG
CAAGCTAAAGTTAATTTACCAGTCAACCAACTCGGACTTGTCGTAGGACCGTTACTCGGT
GGCGTATTCACAACGTTTACTACATGGCGCTGGTGTAAGTGAAATGTTCCATGATCCCTC
CATCGATTCTAACAAGCTTAGGCTTTTATATCAATCTGCCACTCGGAGCTGTTTCGTCGA
TTGCCATTATCTTACTTCGCATTCCCGAGCAAACGCGCAAAGCACCGATTCGAACTATTC
TTCCTAAGCTACATCACTATCTCGACTTGATCGGATTTTGTCTCTTTGCACCAGCCATAG
TGATGCTTCTTCTCGCACTTCAATATGGAGGGAATCAATTTGCATGGAACTCTTCACAAG
TCATCGGGCTATTCTGCGGCTTTGCAGCAACTATTGTTGTTTGGTATTGGTGGAACAGTC
GGCTTGGTGACAAAGCTATGCTCCCGCTTTCATTGGTTACCAAACGGGTTGTCGCGATGG
CTGTTCTCTATCAGGCCTTCATGATGGCCTGTCTTTACGGAGCGATCTATTTTCTTCCCA
TCTATTTCCAGGCTATCTTGAATACCAATGCCATGCTCAGCGGTGTATACTTGCTGCCAA
CAATCCTTCCGCAGCTATTTATGGCCGGACTTTCGGGTCCAATGAGTAAGTTGGCGAAGA
ATTCATCGCTAATTCGACATCTTCATTATGACTGACATTTTTACTAGTAATGAAAGTGGG
ATATCTGATCCCTTTCGCGATCTTCTCGACGGTTCTGATGTCTATTGGCGCTGGCTTGTA
TTCGAAACTAGGTCCTAATAGTTCAAGTGGAAAATGGGCTGGATTTCAAGTCCTTTCTGG
AATTGGCTCAGGCGCTGGTCTTCAAGTGGTTCGTCGTCATGTCTCTAAGCAAATTTGAAA
GTTGTTACTAATATAGTATATAGACCATCATTGCAATACAAGCAGCAACAACAGGAGAAG
AGCTTTCATCTGCAATGGCCTTCCTTATCTTTGGACAAACATTAGGCCCTGCTATCGTCC
TGGTTATATGCAACGTAATCTTTGATAACGCTCTTGAATCACAACTTCCCCAGCATGCAC
CACACATCAACGCTACTGCCATTATCGACGCTGGAGCTACAGGATTCCGAGCCTTTGTTG
ATGAAGCTGATCTTCCTGGTGTTTTACTGGCATACTCTAATAGTATAGATCGCGCTTTCT
ACTTAGTGGCTGCTATGGGCGTAATGTGTGGGTTCGTTCTTTGGGGATTGGGTTGGCAAA
ATGTGAGCATAAAAGCAACGGATGAACAGAATGGACAGGATGAAAAAGTAAAAGAAAGCA
CAGAGAATGGAATCACAAAGGCGTAGGGTTGAAAGAAGAAAGAATTTTTCATTTATCTAA
GCGTAAGTCACGAGTAAAATTTGTTATGCATCTATTGGGCTAAGGTTTAGAAAAGAACGA
CATAGCATAGCATAGATCAATCCCCATCCATTAGTAATAACAAAGTATATTGTATTCTTT
TACTGACTCAACGCCTTTTTTAATTATGGTAGAACAGTCCACAAGCCAAGATTCCACCCT
GGCTCGCCAATTTTCATCGCCTGCTCTTATAGCCTGAAGCATAATTACTA
>f6e894f0-da91-49be-aac5-b9f752eaa38f (mRNA) 1960 residues [Bfab07:366796-368755 + strand] [genomic] name=Bfab07g00990.1
ACTGGCGTCCGTCTAGTCAGCATGCACACAAAATAAGGAACGAATTTGAAGAAGACAAGC
TTCAACGTTCCCTGTGAAACTTGTCTTTAGGGCTTAGAATGTCATAATGCTAATGGGAGC
GGAAAAGCAAACAGGACCAGATCAAGGCTCTAACACCCCCGGAGGACCCTTTTCAACGAG
CAAGTCGTTATTTTCACGTGCAACCCAGGGCTTAGCGCTCTCACAGAAATCCCTGAGAAT
GACCTCGGGAGTGTAAGCTAGCTAGCCTATAGCCCATGACTCACGTCTTATACCCCGCTG
GAACCCCAGTGAAGCAAGCTCTCAGTTAGGAACAGCCTCCATGCGACTACAATAGCACTC
TTTTCTCAGTATCATCAAATTTCTGCTTTTTTGATCTTTGTCTGATTGTTGAGTGTGATA
ATCAACTGCATTGCCATCTATCTACGTTTTCTTCCACCTCAGATAGCTTAAACAGTCAAA
TCAAAATGGAAGCTATCTTTGGCCAAATCAGACAAATCGCCAATAAACTTGGTGACACGG
CGAAGTCATCCTTAATCCGTGATCTTCATACTTTAGCACATTCGCTAGAAAGCGTGGATG
ACACTGTGAAAAGAATAAGCCACTTGGTAAGTTCTATTATCTGAGTTTGGTACGAATTCT
AACTCGAAGCGTTTTAGCATGAAGAAGCCGCGGTGATTCGCGTCGGTATCGATCTCAAAC
TATTTGATATACTGGAGGCTCGCAGAGCTCCACTCAGTCTTGATGAAATTGTCAAAACTA
CTGGTGGTGATAGCCAACTCATTGGTCAGTCGAAGTCGACGCTGGATTTTTCCATAATAT
TAACGCAATCATAAATGTTTAGGGAGGTTGATGCGATTTTTAGCTTCAGTCGCTGTAATC
GAAGAAACTGGTAAAGATTTTTTTTCTGCTACTAATGTAACCAAGAATTTGGTGGTTGAA
GGGAGTCAAGCTGGTGTTTGCCACGGGTATTCCATAAAAATCCTTCAGATGTTACTTCCG
GGCTGAAGGCTAATCAAGTATTAGGTTTGAGACTTCAGGACCAATGTATCAAATGCTACC
AGAGTTCCTGAAGAAAACGAATTATCAAAACCCAAAAGACCCTTTTCATACGGTTTTTCA
AGATGCATTTAACTTTCCCGGGTCAGCTTTTGAATGGTTTGGCCAGAATCCCAAAAACCT
TAGATACTACCAAGAGTATATGGCTGGTCGTCGTCAAAGTGTACAGGAGATGTGGATGTC
AGTTTATCCAATAGAATCCGAGACAAAAGAGCTTGATCCGAAGGCTCCCTTACTTGTTGA
CATAGGTGGAAATATTGGCCATAACTGCGTACACTTCAAGACAATGTTTCCTAATATTCC
TGGTAGAATCATTCTTCAAGATCTGCCAGAGAACATAAAGGCCGCTCTTTCAACGCCGGG
AATCGAACCAATGGTTTACGATTTCTTCAAACCACAACCTATCAAAGGTATGTAAACCAT
CGAGCAAAAATTTTCATTTATAGCAGCATCTGATCTATGTGTTTTAGGTGCAAAGTATTA
CTATTTGGCTCATGTTCTTCATGATTGGCCAGATGATAAGTGCCGCGAGATTCTTCAGAA
TACGAAAGCAGGTATGGGTGAAAATTCGGTCATTCTCATTGATGAAATGATTCTGCCAGA
TACAGGGGTCTCTATGAATGTGACTACGATTGATCTCGAAATGATGTGTGCACATGCATC
TCAGGAAAGAACACAGTCGCAGTGGGATAATCTCCTCACTACAGTGGGACTCAAGAGAAT
TGAAACTTGGGTTTATAATGCTCCTGTATATGAGAGTGTGATGAAAGTTGTTCAAGCTTA
GGAACTTGAAAAGGCCAGTCTTTTCTGCGTTAAAATGAATACCTTATTTTATGTAGCGAA
ATTTGTTTTCTTATTTCCCGTAAACGTATCATCCATTGTG
>9cd9311f-6a81-4ce2-944f-9dee17a4f9a4 (mRNA) 1594 residues [Bfab07:368751-370344 - strand] [genomic] name=Bfab07g01000.1
TGATTAGCAAATCTGGGATGATTAATTTCTTGGCTACTGAGACTATTGGTACGATTTACG
CACTCCGTGCCCGGTGAAGGGTTTGGAAGACACCTACACGAGTATCTGTTGGATTCAATG
TAACTCAATCTTATGGAGAGACTGGGGAGGCAGTTAGTCAATTTTGAGTGAACAATTTTT
ATTGTAACATTCATATGATTGTCCCCTCTTTCCCTTCTCCCTTCCAACGGCTATGCCGCC
ATTTACAATCATACCATAGCCCTCACCCAGGTATATCACAACAGAAATTTTGTGCTTGAT
ATCAGAAAGACAAAAGTTATCGCAATGGCTCCACGTCTTGCATTTATCGGTATGGGTTTG
ATGGGCCAGGTAAGTTTTACCTTTGTAATCTACGATTTTATCCATATTTACTGAAAGTTA
ATTGAATAGGGTATCACAAAGAATCTGGTCGAAAAGGGAGAATTTGAAAAACCTCTAATT
CTCTACAATCGAACACGAAGCCGCGCCGAAGAGCAAAGCGCACGTATTGGACACTCAATA
GTGTCCAGTTCTTTGTCTGAGGTCGTCTCAAAAGCCGACATTATCTGGTCATGTATTCAA
AACGAGGAGGCCGTAACAGAAATGTTCAAGTCCCTCTCCAGTTTTGATATCCGTGGGAAA
TTGTTCGTGGAAAGCTCAACGATCCCGGCTGAGACCGCAGATAGTCTCTCGAAGCAAATC
TTGGATGCTGGTGCCGAGTTTGTTTCTATGCCTGGTTAGTAATATTAATGAATTGTAATT
GAAGTGCTAATAATACTGGCAGTTTTTGGTGAGCCTAGTCTAGCATATGCTGGGAATCTA
GTTTGCGTTCCGGCAGGCCCTCGGGAGTCGGTTGCCCGTATAAAACCTCACCTTGTGGGC
GTGTCAGTTTGAAGTTTTCACCTCCCCTCAAGACTTTTTTCTAATGTTCATCAGAGTAGC
AAAAGCAATTATCGACCTCAGTGGGGAGAGTCCCGGTAAAGCTGCTCTATTAAAGATGAT
AGGAAATGTTCTAATCGTGTCGACAATGGAGACTGTGGCTGAAGTGAGCGTACTTGCAGC
GAAAACTGGAATAGGTAACTCCCATATCCAAGAGTTGATCTCGAACTATTATAAAGTCGG
TCCCACAATATACGCGAAGAAAATGCATGCAGGTGATTACTACAAACATGAGGTGAGGAG
CTAGCAATCACTTGAGAAAACTTGGTCGTTGCTAATTTGACACGCAATAAAGCCAATGGT
CGAGACTTCCAAAGCTATCGATCTTAGTTCAAAAGTTCTTGAGCTAGCGGCATCCGTCGG
AGTGCCGCTAAAAGGGTATGAAGTTGGAATCGAGCATATGGTTGCTGCAAGAGACTATGC
CGGTCCAAAAGCTGATATTCTCAGCATTTATGGAGCTGTCAGAATGGAGAGCAACTTAAA
ATTTCAGAACAGTGATGAGAAATAGTTGTAATGACTTACGGTGGATCTCGGAAAGTGAGG
TTTCTTATACAGATACTGCGCAGTAAATTTATGATGGTTAAGTTTATGTACTAGAATAGA
AAGAAATCAAGTTACCAACAGCTGTAGACCACAA
>578e2d67-5b1c-441b-bd0f-72734fc244dd (mRNA) 3533 residues [Bfab07:371065-374597 + strand] [genomic] name=Bfab07g01010.1
ACAGTAGGATTTTCTTGGGATAAGAACCTTTGATGCTGTGAAGCTAGCTCGACATATCTT
GACCTCTTTCAAAAGAATTATTCTCCACCTGCATTGACTCCACCCTGAGTACCGCAGCAT
TAGCACAGCATGGCCCCAGCCAACATAATAAGCATTCTGAGGCTCTGCGCTAGCAGAGAC
GACGGGCACGGTATCGTCACTTATCCACTGGGGAGCAGAAACAGTGTGAAGACTTTATAT
AAAGATTTAGAGTTCCAAGTGATCCACAACGCAAGACTCCTGTCACGCATCTCCAACTTC
AGACCAAGATCAATCGTTTTACTTCATTTCACGGATCACCTTGATAACATCGTATGGTTT
TGGTCCGTAATTGCTGCTGAAGGCATTCCTGCACTATCAACACCATTCAGCAATGTTGAA
ACCCAGCGCCTGAAACATATTGCACATTTACACAATCTCTTGAAGGCTCCCCTCTGCATA
ACGAGACGTTCCTTGTTAGATCAGTTCTCGGATCAGGATATACTGAAACCATACATTATC
GAAGACATCTTCTCCGCTCAAGTCGCCTTAGAAAATGATACTATAGACGAACTTGGTCGA
GTTGCAAGAGAAGAGTATCCAGAAGACTTAGCTATATTAATGCTTACCTCTGGCAGCACG
GGAAACGCAAAAGCCGTCTGCTTGACTCATGGCCAAATTTTTGCCTCAATGGCTGGAAAG
TCTTCAGTTCGGAAGGATATCCCCAAGGATTTCTCTGCCCTGAACTGGATAGGCTTTGAC
CATGTCGCCAACTTGACAGAGATACACCTTGAAGCCATGTACCTTAATATAGACCAAGTT
CACGTACAGGCTCCAGATGTCATTTCTAACCCTCTGTTTTTACTGGAACTCATACACAAG
CATCGTGTGGGATGGACATTTGCACCAAACTTTTTCTTGGGAAAATTGAGAAAACAGCTA
GACACAGTTGTTGTGGACACTAGTCTCTACCTAGACTTAAGCTGTCTCCGTCTTTTGGTT
TCCGGTGGCGAGGCAAATGTCGTGGAGACATGTGATGTTCTTTCCCGCCATCTAGAAAAA
TACGGAGCACCATCAAATGTGATCTCTGCAGCCTTGTAAGTTAGATCTCAACTCGTTCTT
TGGTTCAATTGCCACTGGAGAAATACCACTCAGCTAATGATGCTGCAGTGGTATGACAGA
AACCTGCGCTGGGTCTATCTATAATCTCGATTGCCCTGGATACGATGTTCATAATATGCA
GCAGTTCTGTTCTCTTGGGCGTTGCGTACCGGGAATAGAGATGCGGGTTACAATCCCTCA
GGCTGGCGATGAAATTGTCCGGGCTTCAGCCAATGAACTTGGCCTTCTTGAGCTTCATGG
ACCTATCGTGTTCAAGTCCTATTTCAATAATAAGTCCGCCACAACAGCTTCCTTCACTCC
AGATGGCTGGTTTAGAACAGGAGATCACGCCACGATCGATCGAGCTGGAATGCTCCATCT
GGCAGGGAGGACAAACGATACCATGAACATCAATGGCGTTAAGTATCTCCCGAACGAGCT
AGAGGCTGCTATCGAAGAGTAAGTTCTATTTCATCGTAATCTGCTCAGCTATCATTCAGC
TAGATAAATCATTGAAGCTGACTTTGCGAAAATGAAGGGTTGGAATTGAGGGTGTGACAC
CGAGTTACACAATATGTTTTTCCTTTCGTCCACTTGGTGCGGAATCAGAGCAAATCGAAG
TTGTTTACTTGCCCTCCTTTGGACCCCAAAATGTCGATGCTCGAATTGCAGCTCGTGACG
CCATTATTCAAGTCACAATGTTGCAAACTGGCTCTCGACCTTCAGTTCTGCCATTGAACG
ATGCTTTGCTGCAGAAAACGACACTCGGAAAACTCTCTCGCGCCAAAATCAGAGCTGCAT
TTGAACGTGGTGACTATAAGAAATGCCTGGAGTTCGATAAGATGCAGATCGAAATATATA
ACTCATCCCATATGCAACAACCTTGTACTGAGAGTGAACGCATCATTCAAGAAGTATTTT
GCGAGGATCTAGATCTCCATCCGCAAGAGTTTGGCGTCAATACGCATGTGTTTGAGATTG
GCATTACCTCCATCCATTTAATCCGATTGAAGCAGAAACTTCAAAGCCGCTTCTCTATCC
CAGAGATTCCCATTCGCATGATGATGCAAAATTCGACCGTTCGAGAGTTAGCCACGGCTT
TGGAGAACCTCGGTAAACCACGAAACTATGAACCCATCATATCACTTCAGAATAACGGAA
AAAAGGCTCCTCTATGGCTCTTTCACCCAGGAGTAAGTGAAATTTTTCCTATAATTCTGC
TGATTCAAATTATCGTGCGTACGCATGAAAGCCTGGAGGAAAGATTATGGTACGGTATTC
GTATTATAATCAACTTAATAGGCTTTCAACTGGATCGTTAGCACAGTTGGTCATAGACAC
ATTTGGATGTAGACAGTATGATTGTTTGGGGATAAGAAACTTATACAGTATAAGTTCTTG
ATCATTTAACCGAGATATCACGGCTTGTGAATCGATCTAGCTCCTTGAACGCTACTTAGA
AGCGACATGCTAACCTTGCGATACCACAGGTTGGCGAGGTTCTCGTATTTCTCAATCTCG
CAAAGTATCTTCCTGATCGCCCAGTATTTGCTCTTCGTGCTCGAGGCTTCGAAAAGGGGG
AAACATTTTTCACAGATATTAAAGAAGCAGTAAACACATATTTCGAAGCCATAAAGAGCA
AGCAACCGAAAGGTCCATATCTTCTCGCAGGTTATTCGTATGGTACAATGCTCGCATTTG
AAACCGCGAAACTGCTAGAAACGAGCGGTGATGAGATTTCCTTCCTTGGATCCTTCAACC
TGCCCCCACATATCAAATTCAGAATGAGACAACTTGATTGGACCGAATGCTTGCTGCATC
TGGCCTACTTCCTTAGTCTCATCGATGTCGAGCATTGCGAGATAATGGCACCACAGCTCC
GACAATATTCCAAAAAGCAAGCTATCCAATACATCAGCAAAGTCGCGAACCCAAATCGTC
TTCTTGAGCTTTCACTCAATGAAGAGATGCTTGGAAATTGGGTCGACCTCTCATATAGGC
TGCAGAGCATGGCAAGTAACTACGACCCCTCGGGAACAGTTGCGATGATAGATATATTTG
TTGCAGATCCCTTGCAAGCTGTGGCAGCGAATAGAGAGGACTGGAGGAAAAATTCCTTAA
GCAAATGGGCGGATTTTAGCAGATCGAAACCAAGATTTCACGATGTAATGGGCGAGCATT
ACACAATGATTGGGGCGGACCATGTTTTCAGTTTCCAGCAGACTTTCCGTAAGGCATTAG
AAGCAAGGGGATGTTGAAATTTTCGCAAGATATAATAATATTATGCGAACCATACCTAGT
GCAGGTAGCAGTATTTGGAGCAATGAAGGCAATATACTATGAACGGTCCGAATATTATGC
TAATATTTATAATTGTTAGATAGCACGTGTATTTTCACTATTGTACGCGCTAG
>dc775c42-5a77-4289-a825-c1357e7f2cad (mRNA) 1816 residues [Bfab07:375611-377426 + strand] [genomic] name=Bfab07g01020.1
CTATGATTATCTGCATGTTACTCACCAAGTGTAACAATTCGATACTGTCAAGTTTTCCGA
ACCTTTAAGGTTCTTTCCGCCAAATGAAATCCCTCTTCCCTTCATCTTTTTTGTTCACGG
TGTTACTATCCTTTATTATTGCAAAGGCGAACAGCATGTCCGAATCACTTCTATCGGAGT
TCCCCCAAGGTGTCTCCGATGCCATTCAATACGAGCGCTCTCTGTGGGCACATAGTGCCG
AAGAGGATGCCGCATTCTACTCGGTGTCTGGAATAGACATGGCATCTGCTCAACCGGGAA
CACCGATCAAAGTGCAAGAAGATGCAAACGTGCCACAGAACTATACTCTTCCACCTAATA
CTGCGGTATCGCGATTCATCTATGTATCGGAGAGTCTATCTGGAGAACGTCGTCCTGTTT
CTGGCTATGTCTTGTGGCCTTATATGCCTCGTCTGGATGCGAACGGCGGAAACCAAGTTG
TTGCCTGGGCTCATGGCACATCAGGAACAACAGTCTCAACTGCCCCATCCAAATTCAAAA
ATCTCTGGAACCATTTTATCGCTCCCTACCAATTAGTTCTTCAGGGCTACGTCGTAGTGG
CCACGGATTATGCTGGTTTGGGTGTTGGTAAAGACCAGAATAACCACTCGATTGCCCACG
ATTTTTTTGCCTCTTCTAGTGTAGCCACCGACGTTGTTTATTCTGTTCAAGCTGCAAAGA
GAGCTTTTCCTCAACTTTCTGAATCGTTCGTTGTGCTTGGACATAGCCAAGGAGGTGGCG
CTACTTGGGGTGTCGCCCAGAAACATGCTGTATCGAAAATTCCAGGTTATCTCGGTGCCA
TAGCCATCTCCCCAGCTACCAGTGTTCTTGATAATCCTGAGCCCTTCGGAAGTCTGATAG
CTGCAACCATGGCTCCCGGAATTGCAGCGTTATATCCGGAATTCGACTACAATGATTTCT
TTACGCCTGACGGCCTAGAACTATTCCAGAAAATCGTCAAGCTCGATTGCGCCTCTTCTA
CAACCATACCAATATTACTCACGCTTGCTGGCAACTTACTAAAGCCTGACTGGACATCTA
ATGAATGGCTTTTGAAATACGACAATCTGACTGCGAATGGTGGACGAAAGATTTCTGGAC
CTCTTCTTGTAATCCAAGGCGACAATGATCCAATGGTCAATTATAATAACACGGTGAAAA
AACTTGGGGCTGCACTTGATCTATCTCCTACATCTCACGTTCAACTTTTCCGCCTCCCAG
GGACCTCACATACCCCTGCTGTAACAGGCTCTCAAAGAATATGGATGGATTGGATTGCAG
ATCGATTTTCTGGAGTTCCACTTCAACCTTTTGATAAGAATGCAAGTTTTACTAGTGTAG
TCACTCCCGCCAGAAATTTGTCAAGCTACGTACCAGAACTTAATTGGTTTGTTGGGCCTG
CAACAGAACCTTATCAAACCCCATAATTCTGTTTCATGCTCATCACTTCACTCTATTTAT
CGGTTTCTCTTTCTAGGAACGAAATATCTCGGGTTTAATTTGCTGATTTTTCTGACATTG
GAGACTCATACAGTCGTGGATGCCTTGACTAGAGGGTCGAGAAATTCTTAAGTAGACTAG
GAGGGTAAATGGATGAAGAATTTCTCTTTGCAAATCGATAAACTTAATCGTTGCGTGTAG
GTGTAGAAAGAAGAAAAAAGGAATACTTTATTATGATTTTTACATTTACAAATTGCTCGT
TACTTCCATCTGATATGCAACATTTGAAATTTGAATACTATACGAGAAATATCTTTGTAT
CTACCGGTTCAATTTA
>0a9ba1ff-0e2b-49ba-8f23-fd655de7a3ee (mRNA) 1193 residues [Bfab07:378795-379987 - strand] [genomic] name=Bfab07g01030.1
CTCACATTCACATTATTTGGAACAATTCTCAAATCTTAATCAGACTACACGATTAACAAT
TGCAATATTTACAACAATCAATATGGCAAGAACTCAAGCAACAAGTTTTATCGTGTTGTC
TGACACACACGATTACCAATTCGGCGATAATGCATCGAGCAAATTGCAGCTTCCCGCACC
AAAAGTTGATGTTCTTCTCCATTCTGGAGATTTAACACAAGTGGGAGGTATTTCCGCCTT
CAAGAAAGCCCTCAAAATGCTCAGCAGCTTTGACGCCGAGATTAAATTGGTTATCGCAGG
AAATCATGATCTGGAGCTTGATGAAGGATGGTGCAAAGCACACCTCGAGGAAGACGAGGA
CTATCTTGACGACCATACACGGGCCATGGAGGTAATGAAGGGGCAATTAGCGAAAGAAGC
GGGTGTTACTTATTTGGAGGAGGGAACACACACTTTCAATCTTAAGAGTGGTGCAACATT
CAAGATCTATGCTTCTCCATACCAACCCGAATTCAATGATTACGCCTTCCCTTATAAACG
CAATGAAGATCGTTTCAATGCATCTGGGGAAACTGCAGAGGGTGTGATTTCTATTGCTGA
GAATCCAATCCCAGCTGGTGTAGATATTGTCATGACCCACGGACCACCAAAGGGCTTTCG
TGACGAGAACCTGGGCTGCGAGAACACCCTTCGCGCTGTCCAACGTGCTAAACCTTTGAT
GCACTGCTTTGGTCATATTCATGAGGGATATGGTGCCAATAAAATTGTGTGGGACGATGA
GAAGAAAGCAAAGGATGACCTGGTTAATAAGTATCCACAGGCTATGGACTTGCATATTGA
GTCTGGCAAAGAAACTCTGATGGTTAATGCGGCGATCCTGGATGGGGAACACCAGCCTAC
TAATGCTCCCTGGATCATCAACTTAGAATTGCCTTCTTCTTAGGATATGATATAGTAGGA
ATTTCAGGGTTCAGGATAGGATCAAAAGGATGAGGATGACAAAAAAGAAATGGTTTTAAC
ATTCAGTTGTAACTAAAATATAAAGTTATTCCCATCATAATCTAATGAAATCAAAAATAG
TAACTTGATTCAGAAAAACAATGTAACGGAGACAGCCTTATAAGATCACGTGGAGTATTA
ACATGATTAATTCTAGAGTTAATTGGGCTGCTCAATGTGTTTTAATTAGAGTT
>da8c3cdf-e67e-4b36-ae11-1e888b0d1c14 (mRNA) 4918 residues [Bfab07:387634-392551 - strand] [genomic] name=Bfab07g01050.1
GAAAGGAGTACTAACATCTGGTATAATAATAGGAGAGGAGGCCAAAAGATTCTTTGGATA
AAACTCTCCCTCTCCCTCTCCCTCTCCCTCTGCCTCTGCCTCTGACCGTAAAAAGAAGTA
ATCGTGTCTGAAACTCACCCCATCTATCAATACTCTCCAGCTACGAGACCGATCTGTTTT
CATCGTTATAACACATAACATATAATATATTAATGAAATACTATTGAAGCTAGAAAGGAG
AGTGGAGATATATGAAAAGCCTTTGTTACTTACACCCCTTCTCATACATTGCATATTCAG
TCAGAAAAATCTTTCGAGTCTTTCGAATCTATCACATCGTCCAGGTATATTTGTCCAGGT
GTTCGTCTCGTCCTGACCCGAATCCTTCGTCTCTTGAAACACTTAAGGCGAGCTACTTAG
CTACTCGAGTCGAGCTATTCTTCTTTCTGCCCCTTCATTTGCTTCTGCCACCGCCAGCAA
GCAAACTTGGAACGGAAAACCATCAGCTACAATCAACGCAAGCAAACAATCTTCATAACA
TCTTCCCACTATAACATACATGCCAGATATCCTTCTACCTTGCCGCCCCTCGTAGCCTTG
GGATCAATTCAAGGTCCGGCTCTTGAATCATCCATCTATCCACTTACGACGGTATCGAGA
GCAAGTTCTTGCAGATCTTACAACAGTCGTCTAAAGCGTCTAAAGGTTTATAGAAAACAA
TCCTTGCACCACTCACTACACTATACCGGGTAGCGATAATCTTTCGCAATCAAATCAATT
TTTAATCTTCGCGGACTGAAACGAGGCAAAAAGAGGAAAAGAGCAAAAGAGCAACATCAT
TCCTTCTCCCGGTCGCATATTATCGTTGTAACTACTACCTACCTAGTATTTCCTTGTCCT
CCCGCCATCCTCTTATCGACGACATAATATTATCGCCGTTAATCGGATAACCTCAACCTC
GACCTCGACCTCGACCTCGACCCCGACAGTACCATAATTACTGGACAACTACTGAAGAAA
AAAAACAAAAAAGCATTCCAGGAAAAAGACATCCTCGATTATTAATACATCGTCCTGTCA
ACAATCCCCTCTTCGATTCGGTTGCCGGTCTAGGCTGTGTCGTCTCCATTTCCAGGCTGA
AAGAAAATCACCGGAGCTGGATTCTTCTGAAACCAAGCCTCTACTTGGGTACCTTTGCCC
TGCTTACGAATTCCACAACACGCTCTTGTTTGTCTTGATGCGGTGACAGAGATACGATTC
ATATCACCTCATCCTTTCCACCCCTTTCACGACCTACTATCGCGATCACCCCTCTCGTCG
AGCCCGTAGTGATCAGATCAATATCGTCGACCACAATGAGTACCGATCCTCAATCAACTC
GGGAGCCAGCAGCTGGCCCGAGATCCGGTCCCTCCTTTCTACCTACCAATATCATCCGTA
TAAATGATCTCAATGGTTCCGAGGTCGAAGGAGCATTCGGCGGCCATAATCCCCAGGAGT
CGGCGGTTACGACACCTCGACCCAATACCGCACCCAATACCCAACCTCGGCCGATGCATG
GATCGGAAGATGCAACGACTCCTACGACAGTCACATTCAGACCAGCCTCAGATGCGCTTG
CCAATCAAAGACCTCTCCCACAAGCCCCTTTCGATGTCGCCGCGACCATTCCAGAAACTG
TGGCAGGTTTGACAGCCATGAACCGAGACAATTCGACGAGGTCAAACAATTCTGTTGGTT
CTGAAGACGTTGATATGGATAAATCCGATGCTGCTAGTTCCAATGGCAATAGCCCAAGGC
CGCACAAGAAGAAGAAGAGTCAGAAATTCTATTGCACGGATTATCCGCCTTGTAACCTCA
ACTTTACCAGGACCGAGCATTTGCAGCGTCATATAAGGTAATTCACTACGTTTTGAGCTA
CTCTACAATCACCTTCTCATCTACTAACCCTTGGTGTGACGCAGAAAACACACAGGAGAA
CGTCCCTACGAATGCTTTTGTGGGCGTTACTTCTCTCGAAGAGACAATCTACGCCAGCAT
GCTCAAACGGTGCATCAAAAGGAGGAAATCCCCCCAGGATCGTTGGCAGCCACTAGCACA
AGATTTCCTAGACAGCCTCGTACAGATAGATCTAAGCCCCCTGGAAGACAAAGAGCTGCC
ACGGTGAGCGAACAGGTACCTTCATATCGTGGTCATCATCGAAATTCCTACTCCACTTCC
AGCATAATGTCGAATATGTCGCACGTATCCGGTTATAGTCAAGCACACAATCTCAGACGT
CCGCTCGCACTACAGATGCCGAGCCCCCTAACAAGACGCCCAAGTTCACCTGGAGGTTAT
AGTACGCCCACTTCCGCTACTTTCTCAACCGGTCAGAATAGTCCGCGATGGCCAACACTT
GGGTTTCAATCATCTCCTGGACCAGGCGTAGGTGTACCAATACCAGCTGGTCGCATTTAT
GACGGGCATCACACGCCCGGTCGAAGATTGTCTACACCCTCGGCCGCAAATCCGTTCTCT
CCTTCTGGTCCCGCTTCCAACCCTTTTGGCACTTCATCAACTTACTCTGCAGCGGCACCC
TATTCGCCAAGCTTGATTTCAAGCCCTACTAACTCGACATTCAACAATGCTGGACAATCA
ATGGCTGCCCATCATTCAGATATGGATAATAGAAGGAGAACATGGCACCAGGGAACCAAT
GCGGCTACACTAGCATCATTTACCACAAGACTGCACAGTGTCATGAACGCAAACCACTAC
GCTGATGGTCCTATACCTGAACCCGCCGCGATTCTTCGCAGTAATGCTCCTCCACAAGAA
CATGCAAGACTTCCCGGAATTTCAAGCTTGTTACCTGGCAGAGGAGAATCCCCTCCGCCT
CTCCGCAGTCGAGAACAAATGATGATTGACAGACCACACTCTTACCATCAGCCAAGCCTT
AGCATGACTGAGCGTCCAAGAGAAAATCCTGTTGATAGACCAGCGTCCTATTACCAGCCG
ATTTCTGACATGGCTAATCGTGGTCCAAGCCAAAGGATGATTGATAGACCACCGCCTTAC
TATCAGAACAATACTCCCATGTCCGATGACCCTCGCCCGAGTCAACTAATGAACGATAGA
CCAAATTCTTACCACCAGCCAAACCCGATTGTGCCTGAACGTCGTCCAAGTCAAATTATG
ACTGATAGACCAAGCTCTTATTATCAACCAAGACATTCTATATCAGAATCTGTTCCCTAT
TCTAGCTCAAGACCCATGACTTCCAGGGACCGACCTCTTAGCTCTCACCTTGATCGACAA
TTCAACCAACTAGAAATCCAAGGCCCACCACATGCGGATGCTGCAAGCTGGGCTACCGAG
ACAGCTCGTGCTGTTCATGCAACTGCGCAGCAATCACAGGCCAATCAGCCAAGAGTCACA
TTTGAGCAGCCAGCACTTGGTCCTCGAACAGGGGCTTCTTCGTCCTATCATCACAAGCAT
ACTGCTAGTTTACCTGTCAACATGCACAGATCAAACAGACGCGATGGATGGTACAATGGT
CCAGTGGTATACCAACAGACTTCTGATAACAGATTTCAAGGAACCTCTCCGGAAGGGTCA
ACTGGCTCCGAAGGTGCAGCGCCTATAACTCCACAGAGTGCCACCGCGACAGATTATAAC
CCTGCCGTTGTACGATCAAACGGGTACCACGAGGAACATTCCCGAACCGTTCATCCCCAA
CAACCAACTGTTCACCACTACCACACACTATCGAATGGCAATGAACATTCTTACACACAT
AAGCCCCCTACGTCAACTCAAACCATGTATCCACAAGTCCCTCAGTCATCTACACAACAT
TATCGCACTGAAGGATTGGACGCTCTGGCAGCAGCCGCAACAAGTGGTCAGATCAGTGTA
CACAACAATGCATTTTGAAGGATTGATTTCGTTGGTTCATACCTTTTGCGTAAATATTAC
ACCTCGAGTCAATTTCTTTTAACGATACCCGATTTACATTCTATTTGAAGAATGTCACGA
ATTCATGAAACAAGACAGATTAACTTTTTTATCACGATTTTCCCTTTTTTTCTGCGATTA
CTGGGAATGGGACATTGTGATTTGCCAGCGTTGGTGTTTAGGGTTTTGGCATTAACTGTT
TTTTTTTTCTTTCTATTTTTCCCTCTGAAGCTTCATCGAATTCTTCACGCCATTCAATGT
TGTGGAATATACAGTAGATCTCATGTACTGGGGCTAGTACCTGTTATTGTGTCTAGCGTT
TTCGTCGTCAAATCCGATATTTTTGACCACTTATCACACAGTGCATTGATGTCTTATACG
AAACTTCGATTTTCTTCAATGACTTGGAGGAAGCTTGAGCCCGAGTTTCTAACCTATTTC
CTTTGTATTCAGGTCTGATTTTTGGGTAGCGTTTGGGTGGGATTACTTTGGATTATTTAT
CATGATTTAGCGTACTTGGGAGGTTTCAATTGTTATTTCTAGCGTCAGGACAAGGCGGTA
CTCTACTCGGGATTTTCTAATGGGCGGTATGCTTGGCTATGACTTGGCTATGAGATTTGC
ACTATTGATACCTCTATACCCAAATGCTATTCAATCATTTTCTCAAAGTTATTTCGGCAA
TTTTCTTTAGAGTTTACGGTTCTAGACATGTGTGTGTGCTCCTTCATTTTCATAAAGTGG
CAGATACAATATTCGGATCTGGGGAATTGTTATCAAGGCCGAAGATGGTGTGATGTCATG
GATTTTGGGATGGAATGAACTGGTTGGCTGGCTGGCTGGCGTCTTGTTAGTCTGTTTTTT
ATGCTTGCATCTTCGTATCTAGGGGTCCTTTTAGTATGTTAAGTATGTCCTCAAATTTTG
AGAATACGGGGTTTGATCTTTTAACCCGTGGAGCTGGGAAACGGGTTGGGTGGGCTGG
>c02c89a3-d5bf-4a91-aa34-a3197fba5ac9 (mRNA) 5071 residues [Bfab07:397028-402098 - strand] [genomic] name=Bfab07g01060.1
TTATCTCTTATGCCGACTACTCGACTCAAGTTGGCTACCGCAGCCCACTAAGAAATTCAA
ATCATCGGATTCATAATTCACCATGCCATTGCCGGCGACCAGCATGCAGATTTTATCTGA
TAGACGGCATCCACTTCTACTGATCAGTCCAATCAAGATCTTCAGATCTCCGCCGCCTTA
TACCTAGCTACCTGCTATTGCTACTACAGTCTTTTGGGGCCTTTCAAACCTTAATAACTT
GTCTTTGAATTCTTATTTTCATGATTACCACACCTCGCTATGGTACCGTGTGTCTGTTTG
TATACGACTTCATTTATGCTACATTCACTCGCTCGCTTGCTCGTCCGTCCATTTGTTAAA
TCCAATCCTGTCCCGCTTTCGTGATTACCTAGGTAGAGTTTGCCCTTTTGGAAGAATTGT
ATGGTCACATTTGAGCATGACGCCTGTGAGAAGATTCCATTAATTCGCCTCCCAACTGCG
ATGCCAGCCGAGTTCAGTTCGGAAACACCTATTAGGGTGTCTGAAGTTCATAGGGTACGA
GAAGTTTACAAGTCAGTGAAATGAATCTTCCTTATCCTTTCGACTCATTCCATCCTAACA
TTTGACTATCCAGATATCTTCCCCCCTTTGCAGCACCCCCCATCCCCCCGCGCGAACAAA
ATGATAAAAATGCAGAAAGTTCCAAAAACTACCCCAAGGCTTTCTCGTCATCGGATAGAG
CACTCAATGCCTTTGCACAACTTGGTGCTCTGCGATTAAGGGCAAGGCGGGCTATGATCT
CCCTTGTTGATCGCACACATGAATATATTTTGGCAGAGTCGACCAAGACATTATCATCAC
AGAATGATGATGTGCACGATGATGGAGATTCCCTATGGCTAGGCTTACGAACTATACCTC
GCGAAGACTCATTATGTGCTGCTTTTATAAACACACCACGATCAGAGAGCCAGCGCAACG
ATACTGAATTTCGACCTAAGGTAATACCAAAAGTTATAAACGATCTGTCTGGAGAAACTT
TGCGTTTCGACCCCAATATTATTGGATGCCCGAAGATCCGGTTCGTGGCTACTGTGCCAA
TACGATCTCGTCAAGGATTTGACATAGGCGCATATAGTGTGTTTGATGACATACCTCGGA
ACGGATTGTTGCCAGAAGAATTGGAATTTTTAACGGACATAACTGATACAGTGATGGAGC
ACCTTGAGAACATTGCTGTAAAGCGAGACCATCAGAGAGGAGAGAAGATGGTGAAAGGAT
TAGGATTGTTTGTGGAAGGCCATTCTAGCATCAAGTCTTGGTGGCTGCGCACTCGAAATG
ATCGCGAAACATCTGTTCGGGGCAAAGATTCATATGCTATAAGAAGCGTAGGGAATCCGA
CGATTCCTACTGAAGCTTCCCTTGAGAATTTAGCGATTGCTGGCCCTGAAGCAAATTCAT
CGTCTGCCAATCGATTTCAAAAGATGGAGGAGTTGACATCTCTACTTCCGACCTCATCCT
CACCTCCAAGTAATCTTTGCAATGGTCTGCCGCTCAGGCCGGGAGGTGAACATGACGAAT
CAAATAACCATTCCTATGTTCAAGTGAGGAATATCTCACCCTGCTTCAAGGAACAACTCG
ACCAACCATCCACCCTCAATTCACCCATTCATTCTCCTCAAATACCTCTTGACTCGCCAT
CAAACGAAACCCCTAGAAGCTCATTATCCAAGTCTCTCGATCAAGCGCATACACCTATGA
CACCTAGAGATACAACTATCAACGATGTTAAAACTCGTTCTCCTTCCGAAAAAGCCGAAG
TTTTAAAAAGAATGCTTTCTCGTGCTAGTAATCTCATACGTGAGTCGACAGATGTGGAAG
GCGTGATTTTTTTTGATGCTAAAGAAAGCTCTTTTGGACGTCAATCTTCTTTGAATGATC
AAGAGAGAACCGCTGGCTTACACGATGCTGCACAGATTTCCAGCAGCGAAGATGCTTCAA
GAACCTCTTCGCGGCACGATACCTCGGATAGTGTTGATGGAAGGGATTCTGACAGGGGGC
CAGAAGTGAAGGCACAGTCGTCGCAAACACGCATGTGTGAAGTACTAGCATATTCCACAG
CCTCACGTTGTACATTGCGTGGGGATGCAAGTTTTCCAGAGCACCTCACTGTTAAAGAAA
GCTTTGTTCGCCGCCTTCTCAAGCGCCATCCTCATGGCAAAGTTTTTGCCTTTGACGAAG
GAGGTCATATGTCGTCAAGTGAAGATGAAATTCTCGACGCTGCGTCGACTGGAGAAATAT
CAATCGTTGCGGAAACTTCCCAAAACTCGATATGTCAGAAAGCATCTTCTAAGGTTATGG
AAGGTCGAACTATGCTACAAATATTTCCCGGCGCTAGATACGTAATGATTTTACCATTAT
GGGATTCACATAGTGAGCGCTGGTTTGCTAGTACTATGCTTTGGACCTCAGATCCAACTC
GAGTACTTAGTCTAGATGACGATCTAAATTATGTTGCTGCTTTCGGAAATAGTATCATGG
CTGAAGTCTCTCGTCTAGAGATAGTCGCATCTGACCAAACGAAGACTGCTTTGATATCAT
CAATAAGTCATGAACTGAGGAGTCCGCTACAAGGAATTCAAGGATCGATCGAGCTTCTAC
AAGATACACAAATTAGCACATATCAAAGGAGTGCGTTGGAGACAATTGGACATTGTTCTA
CAACTCTACTCGATACATTAACTAATGTACTTGACTATGCCAAAATCAACAATTTTACCA
CGGCGCAAAAGACGGAACAAAGAGTGGTACGCAACTCGTCTAACAGAAGAAGGGCCGTTC
CAGCAGAGAAGTTTCAGATTTACGGGACAATCAGCTTGACCTCAGATCTTGATATTGCTT
CAATTACAGAGGATGTCATTAATGGGATATATGCTGGGCACATTCATGTTATTCACTCGA
ATCCACATTACACTTACACTGATATTGACTACCTAAATTCGCCTACCAATTCTGATTTTC
AAGGAACGAAGGACTCAGCGCCGTTAACTGTAATTCTTGATGTAGACCACAAATCCAACT
GGACTTTTTTAACTCAACCTGGGGCTTGGAAGCGTATTCTGATGAATATTTTTGGCAACG
CATTGAAATATACCACATCAGGATTGATCAAAGTCAGTCTTGGGTGTAAGACTGTCACAT
CGAAAAACTCAAGAGTCAATCAAGCGTTAGTTACTTTGACGATTAGTGATACCGGTAGGG
GAATTGCGGAAGATTTCCTGAAGCGTCAAATATACACCCCTTTTGCCCAGGAAGATAGCT
TGACACCTGGCGCTGGATTGGGTCTCAGTATCGTTCGTCAAATTGTCGGAGCACTCGATG
GGAAAATCGATGTTTTTAGTATCCAAGGTACCGGTACAGTCGTCAACGTTGTTCTCAAAC
TAGATCAGTCCCAACCACAATTTGGCGACCTACCTCGCATGCCAAACAATATCGAAAAAG
CTAGAAGTTACACTCATGGCCTAGAGTTGGTATTGATAGGAATGGAAATTTCACCGCCTG
AACCTGAGAGAAAGGCAGGTGGGGAATCTAGCTATGATATATCTGTGGGTCCAGCAATCT
CTAGGATGGCCAGGAATTGGTTTGGAATGAAGCTTAGTGAAGCTGTTGGACTTGATGCAA
TGAGTGCAGATGTCTTCATGGTAACTTCCGAAAAATTCTACGAACTGGAGGATCATTGGA
AAACTCTCTGCTCGGAAACTACAGGTGATACTCATAAGAAGCATTTGATTGTTTTAACAG
GCTTTGAACAATCTGAAAGAAGAACCTTGTTCAAGACCCACCAAAATATACATTTCCTCA
GCAATCCGTACGTTTTCTCTTCATTACTCATGACTGAAATTTTCTCCCTCAATTGAAATT
CCTGAATATGACTAACAATATTCTAGAATTGGCCCCAAAAAGCTCGCAGATTGTTTTCTC
TCTATATTCGAAAGATCTAGTAGCCGGAATAATAATTCCTTCCTCACAATGCCTCCTAAT
CCACGACGAACCACTTCTCCTGCTCTTAACACAAGTAGTGCTAAACCAGAACACAATCGT
TCACTATCCGAAATTCTCTTGACCACTAAGCCGATCGCACTCCTCGTCGAAGACAACACC
ATTAATATGAAAATTCTCATCGCCTGTATGAAAAAATTATCTGTGCAATATTACTGCGCA
GTAAATGGTCTACATGCAGTAACCACCTACCAAAACGCGAGAGTGAAACCTGATATTATT
TTTATGGATATAAGTATGCCGATCATGAACGGGTTTGAGGCATCTCGAAAGATTAGGGGG
TTGGAGAAGAGAGAGGGTTGGAAAGCAAGTGTTATAGTGGCGGTGACTGGGTTGGCTAGT
GATGAGAGCCAGAGGGAGGCATATAGTAGTGGGATCAATCTTTTTATGAGTAAACCTGTA
CCTTTGAAGGAATTGGAAAAGATAGTGGTGGAAATGGAGAAGGAGAGCGAGAGGAGAGGG
AGTGGGTAGGGTCAAGGATTTGGTGGAGTTAAAAGGAGGACTGGGCTAATAGATAGATAA
ATGGATGGATGGATGGGTCGGGTTTCGGGGGTGATTTGGGATGGTGTGAGATGAACTGAG
ATCGGATGACATGGAATGTTACAAGGTTCGGCTGGGACATGATGGCATGGAATAAAAAGG
AACGGTATATAAATCGGATGGGATAGGATGGGCTGGGATAGGATCAAACGAGATACACAA
AGATCATGCATATACCTAGCCTTCTATACAGATACAACGATACCCCGTACACAAACCATG
GGATTGTTTATACATATTGTAATATAGACATATGGTGTGTAATATGTTTTACATGAATGG
TTTGAAAGTTTACTTTAATTGGGTAGTCGTATAGTTGGATAGCTTGGTATTGGATCTAAT
GATAATGATGAAGATTGTAGAAATTGGAAATTAGATGGGGTATTTGACTTGGTTTGGCTT
TATCTGAATTGAGTTGAGTGATTGGGCGGGTGGCGTGTAATGGGTTGCAGGCGAGGAGAG
AAAGAGAAGAGGTTCGAGGCTGGATATGGAT
>dcdbd6bf-ef4a-4b52-83d0-90c34bbc8aa1 (mRNA) 2971 residues [Bfab07:402569-405539 - strand] [genomic] name=Bfab07g01070.1
CAAATCAGACCATTAAGACGGCCATTGCTCTGTAAATCTTCCTGAAGTGCAGCACATGCG
TAGACTCAGCTAATGTTCCTACAATGTCCATACGACGGCAAAACTTCGGTTCTTATTCGT
ATGTACCGATCCACTTTAAATGGCGTACGGGATGGCCTTGTGAGTGAACTCCCATATTAC
TATCGCAAATAGCAAGGCTCGTTCTGCGCGAAGAGAAAGTTGGGTAGATCATGAGGAAAT
TGAAATTCGCAGGACATGCAATATTCTTTTTGGATATATGGATCATTCTCATAACACTTA
CAGCGTTAGCCATCATTAATTAAACTTTAACGAAAGGAGAACTACATGAACTTAACGTCC
GCAGGTTCCGACCTGAGGATACTCTGCTAAATCTTTGAGCATATATAAGTGTACTATTTT
CTCGTCTCCTTTCAATCACCATCTTTATCAAACTGTAAATACTCACTCTACCATCATGAT
CATCATTACAATTCTTTCTTTTCTATATCTGGCATTACCAGCGAGATCAGCAACCGGCCA
AGCATCAAACTTCAATGTCAGCATAGTTGAGCTCCAATCATATGGGTGTAATGCGTCCTG
TCAAGCAATCCTATCCATATCTAATACTGCCGACCTCGAAACCGTCGGTACAGAATTCGA
CTTTGATTTCTACAGTACAGCAAACAATTTCTCTTCCTCTACTCCAGGCGACCTTCTAAA
ACTGCAACCAGTCGATAGCTCTGCCCTGAGCATACCCGATGGCATTGCAACTTTTCGATT
TCAGTATACTTCCATAGACTTAGATGGTAGTATCGTACCATCGGGTGGCTTCATAGCATT
TCCTTTTGCCTCACCAGCAAATGGGAGTCAGCTTCCCCTTGTCGCCTACGCCCACGGTAC
AATTGGTGTTCATCGAGGATGCGCGCCATCATCTTCCCCAAGTCTTTTCAACTATAATAG
CTGGGCTCAATTGATGTACAGTGGCTATGCTGTTGTAGCCACCGATTACGCCGGTCTCGG
AAACAACCATACCTTACACAAATACAGTGCTTTCACGGCTCATGCCAATGATGTACTCTA
TTCCATCCAGGCAGCTCGGAAAGCATTTCCCGGTGTGTTCACAAAAGAATGGGCGAGTTT
GGGGCATTCTCAAGGTGGTGGCGCCGTGTGGAAGCTATCGGAGCATCCTCTTATACAAAA
CCATACCTCTGGATATCTTGGAACAGTTGCCATATCTCCCGCATCCAAGATTTTTGACAT
GGCGGTCGAGACCTTCGAACGCATAGTCCCTCGCCCTGGTTTTCACCAGTTTGTCGTTAC
TGCCGAATTGGGCCAAGTTATTTACGGCCTCAAAGCAATCTTTCCCAATTACACGTCGCC
ATTTTTGGCCTATGGGTTGAAGAAGCGGGTGGAGTTGGCCAATGTAATGCAGTCTTGTAC
TCTGGCTTTCATGGGCCTCTCCCTAGACTTGCCACGGGACCAGTTCGCAGTCGCTAATGG
AACACCTGCGAATGATGAACTTTTCAAAAAATTTCAGGATATGAACGCCCCAGCACAAGG
TGATCGAGCTTCGAAGCCAATATTGATCATTCAGGGATGGAACGATACTTCGGTTCTCCC
TCAAAGCACCTTGGCGTCATTCCAGGAAACCGTGAAAGCAGGCAATGTTGCGCATTTGGT
TAGATACCCGGGACTGGACCACTCTGCGACAATCACAGCTTCTACTCCTTTGTGGTTGAA
ATATCTAGCTGAGCTGTTTGCTCATAAGAAACAATCTCACAAGTCGTCGGATACCACGAT
TGTGCCATTCAATTTGGACGTGGCCAAAACCCCATTAGAGCTTCCTCTCAACGAGGAACC
TCTGTTGAGCTTACTGGGACGGGGTGAATGATAGAAAATCATGCTGACGAGGAGAATGAT
TACAAGAGTGTCACCCGTTTGAGTAAGAACTTTAATGGCTCGCAAAGTTCGTGGCGCTCT
TGACAGCTTCTATCCATGCGCTTTAGAAAAATTGAGTTTAGACTTTTAGTGCGCAGGCAA
CCCCGTCGAAGATTTTGTAGATAGAAATTGAATCTGAATAACTTTATTTTTACACACCAA
GCTATTGGTTATGTCTGATGTGAAGCATGCACTCTCTAAATAATTTCCCCTGTAGCTGCG
AAGTCGCGCTTAAAGGGGCTGGAATTTCACGAGACAGGATTCCTCAGATAACCAGAAATA
TCTCGAGATAGAATGTGCCACAGAAAAGCTGCTTTGAAGAGCAACGAAGCTATTCCGCTC
CACTCGAGGACTATTGTGTAGCCTGAGGACCCACCCATGTTGATTTTCTATAAATCCTGC
GATGAAATGTCGTCTCAATCCGAAGATAACCGTTGGTAAAGTGCTGTGCAGTTTTCCACA
CTACATCGACGATAGCCACAGGCCATCAAAAAACACCAAATAACATAACCAAAATACAGC
CATTTTTGGTTTTGATCTAATTAGAATGCTGGCGTTGAAAATGGGAAACGGGAGTTGGTG
ATGGATAAGGACCATGAATTTGGTGGGATGGAGTTCGCGCTGATGCTCGTGAACGGTGCC
GGTAGAGGGTTAGACACATGGTAACCAGTAGAGACACGGCGTATCTATATTAAAATATGT
CTCATACTCGTGGTCCACATGTGGTATACTAGCCTGTCTTTCATAACATACCGGTATCCC
GAAAATCAGCGGCTCCTATCCAAGTCAAACTTAGCCATCATTTACCCAATAAGGAGATAT
TTACGCATATCGTAACATGTCTTCCCCTTTAATCGATGAAATGTGACTATGGCTAAACAA
AGTTCAAGCCTCTGTATGCACTATACCCCGCATCAAGCGTGCAGAGTCGTAAAAGTACCG
AAGGATCAAGAAGGCCTAGGTAGGTGGATCATCGTGGATGATGTCGGATTGCGAGGTTGA
GTTGTGGTTATTGTTGTAATTGATGTAGAAG
>e9e25daa-0734-42e4-b591-e5b39b7cb4a6 (mRNA) 2070 residues [Bfab07:405675-407744 - strand] [genomic] name=Bfab07g01080.1
AAAAAAGCAGAAAATTCGAATTTACATAAAATATTCAAATTCGTGATTCAAATTTGAGAT
GGTTGGCCTAATCTCACTTAAGGTACATACGATAAGCTAGGGCCACAACTCTTACTTATA
TACATGTACTATAACTTCGATAACTACATCTGCCGCAGCCCTCCTTAATAATCTCCTTCT
TGCTGAATACGCAGCACACACAATCATGGGCTCTGTCTTCTCACTCTTGCGAGATGGCTA
TTTCGGCATCTTGGGCCTCATTGCCATTATTGCCGAGAGCAATAAGGCCGCTTCTGCGCT
GCTTGATCGCATCACTCAAGTGAAATTTCCCCACGAAAATCCCACAAGCTCTTTTTGGGA
ACAGCAGCCTTTACATCCTGAACTTGTAAATATTCAGTCTGAGCAATTGGCTCCACGTGC
AGATATTGTGATTATTGGGTCTGGTATGACTGGAGCCAGTGTCGCATATACCATCCTGAA
TGAATGTCTGGCTATTGCGAGACCAGTAAAAGTAGCTATTCTAGAGGGGCGGACTATATG
TAGCGGTGCAACGGGCAGGAATGGTGGACATATCAAAGTGGCCCCTTTCTATGAGTACAA
AAAATTTAAGGATAGGTTCGGAGCCGCAAGTGCGCAAAAGATATTGGAGTTTTATTTGAA
GCATAGACCTTTCCTCCTCAACTTATCTAGAGAAGAAGGATTGAAAGAAGGTGAAGCACG
AGACGTTACGACAGTGGATGCTTTCACTGATGCGGAGAGGCTTAAAGAAGCTACTGAGAT
GCTATGTATCCTGCGAGAAGATCTACCCGAGCTTGCCAAAGGAATTGAGATTCTAGACGG
AGAGACAGTCCAGAAGGTAAACCCCCGGCACAATCTCCAATAAAGAGCACTTTCTAAATC
CCCGCAGCAATTTGGTTTCAGTAGTCAGTTCCATGGAGGGATTACCTACACCAGTGGTGC
ATTATGGCCATATCGATTTGTCACTGCTATATATGCGGCTCTGCTATCAATATTTCCAGA
GCAGTTCTCTATCGAGACAGGAGCCATGGTGCAATCAATTCAAACTACGAGTAACCCAGA
TAGTCCGTTCCTTCTGAACACCTCACGGGGCGACATCACAGCCGCACATGTCGTCCATGC
AACAGAAGCCTTCACCGCAAACCTAGTACCCGGATTGGTTGGGAAACTTCTCCCTCTGCG
TGGATACATGTCTGCTCAACGACCAGGAAAATCTTTTCCTCACTACGATGGTAAGACCTC
TTGGTCTATCGTTGGTAGTCGAGACTATGAATATATCACGCAGCGGCCTGGAAAGCCCGA
TGCGACGGATGGTTTGGGGGCTGAGATTATGACCGGAGGTGGATCAGTCCATATGGATGG
CACCGGCTTAAATGAAGTTGGTCAATGGGACGATGACAAGATTGAACAACCCATCGGATC
ATATCTCGCAGGTGTACTTCCGGTATCTTTCCGCTCCAGTTTTTGGGGAGAAGATGCCAA
TGGCTCTATCGTGAAAAGTATGTGGACCGGTGCCATGGGACTAACTTGTGACTTCATGCC
TCTCGTAGGAAAACTTTCACCAAGTCTAACCAAGCGTGCTGTGAACTTAGGAAACAAGCA
GGTCACTGCGAATACAAATGCTGCGCCAGCAGAGTGGATAGCAGCAGGATTCAACGGATC
AGGCATGGTTACCACCTGGCTAAGCGGGGTGGCTGTTGCACTCCAGGTTCTCGGTCGCGA
AAATGTCAATTCTAATGGGCAAATCTGGAAACCAGATGGAGTAGTCAGCGACTGGTTTCC
AGAAGAGTTTATTTGCTCTTCGAAAAGGGTTGCTCGAAGCAGCATCCACGAGCTTCCCCG
TCTCATATGATCTTTCATACTTGTAAAATTAAACAAGCCTTGGTGTCCCGCATCAGAAGA
CCAAAAAATAAAGCGAGGCATTCATATTCACATTCACAGTACCTTCCAGAATCCTTCTAT
CTCCAATATTCAACTCCTCTTCACTTCTAAATTCTCAAAAACCACTAAACGATTTTGTTG
TCCCTGATAATCCACTCCCAAATGAAGCTG
>78742ba7-735d-4b84-a6d0-59d53b7cd15b (mRNA) 3015 residues [Bfab07:409113-412127 + strand] [genomic] name=Bfab07g01090.1
CCTGTCGATCTGGTGGAGTTCTGGAAAAGCGCCAAGTTTGTAATGCACTGCACTGGCTTT
GGGTCGCAGTCCCGGTCATGTTCATTGAGATTTCGAGTATATAGAATCAGTCGAGACTTT
TGGTAACATGATTTCAATTTCCATATTCTACTCATCATTCGTTTTCCTATTTTCAATTCC
ATTCATTGTTTCGTATCTTGTCTGTCATTGATTATTTCCTTCTTTTTCTTTTTCCTTTCA
CAACTTTCTTTGCTAAATTGTTAATCATTAATTTTGGTACCAAAAATTCGCAATCTTTCA
CATATTTATCAGTCTATAACCCTAGTACACATCTAGCTTTTCTTTTCCTCCTAAAAATCC
TTCCCACGAAACAATTCTTAGAAGTATCATTTCTACAATCATGAAGGTCTCTCATCCACT
CTCTTTTTTTAGTACAATTTTTCTCTCTCACCTTGTTGCGGCTGGTCCGTTGTGGCGCAA
CGGAACAAGTAGGAAGTAAGTAAACTTCTCTCTCACCCCAGGTCACTTTGCCTGGTTGGT
TCCTGGATCGATAGTTCTGATTTAATTTGGCCTTAGCTTTATACGAGGGGGTGAAATGAA
AAGGGATAGCGTTACTCCCATCGCGATCACTATTCTACCTGGGACGGTCACTTCTTCGAT
AATTAGTTCTACAGCCCAAGCCGAATCCACATTGTCGATAGAAGGCACCACCTCATCCAG
CACAACAGATTTTACTTCACAGTCGAGCAGCACTTCAGCTACGTCCATAATACAGTCAAC
GGAGGGATCGAAAACGACAGAATCAAAAAGCGAAACGAGTACTTCTAGCACATCATCGGA
CAAAGATAGCGAATCGAGGACTCCATTGAGCTCTGCTACATCCTCGCAACTAGCGTCTTC
AATTATATCGAGTATAGGAGGTACAGCTCCGATACGATCAAGTAAATTTTCAAATACCGA
AACCATAGATGGAAGCGTAATTCCAAAAGCAACAGAATTAACTCTTACTCTTACTCCACC
ACTAAGCACAACGTCCACCGGGAAATCTTCTACGAAAACTGAAACGTCAAGTCAGGGTAC
ATCTGAGTCACAAGCTGGTTCTCCCTCATCGAGCCAGGTTTCTTTGCAGACTACAACGTT
TGCGCCTCTTCCTACTAGTTTACCTGAGAGTAGTCTTACGGCGAAAGCTTCTTCAGTCTC
ACTAGATAGTTCGACACTGTCAAGTCTGAATTCTGTTCAAACTACAACATTCCCACCGCT
TCCAACTACCTCTCCAAAGGCTACTACAACCCCAGAAAGCTCTTCGGGTGAAACTTTCGA
GGGATCTCCGTCAGCAACTTCATCATTCGTGCCGACATTAGCGTCGAGTATATCAGTCGC
ACCATTCGGTACTGGAAACTCAAGCACGGCAGCTACAGGAGATCCGCAAAGTTCCGGTAA
TTCGGATCCGAGTTTTGGATCCACGATTGGCATCACAACGGAAGCTTCTGGGATCACTTC
TCAAACTTCTATAAGGGAAACTCTGTCACCTACCACGGTTTCATCAAGCACTGCTAGAGC
TTCAAGCTTGGTGGAAAGTGTCGTTTCGACGAAGGAGACTTCAAAGGTTACCGCTCAACC
GCAAAGCACTATCGTGCAGTCTAGTGTGGTGGCGACTCAAGACTTAGGATCTACCACAGG
AGCATCCGACCAGAGCATTACTTCTCAAACCCCAATAACTGGAGGTCTGTCTCAGGCGAC
ATCGATTGATTCTTTACAGACAACATTTGTATACGTAACCACAGTTGTTCCATCTTCAAC
TCTTGGAGTTATCCCATCCTCCTCCTTTTTATCCAAAACCTCAACTTCATCTACACAAGT
AGAAACCACAAAACTTGAATCTTCAACATCTTCACTCTCTTCGGCAGCAATAACCATCAA
GACAACCGAGGTCTCTTCGTTTTCCTCGTCCTCGGAGCCACAAACTACAATTTTCCCCGA
ACTACCCACTACACAACCTGCTAGTACAGCAGAAATTCTCGTAACAACCGTAACACTATC
AAGTAAAACAAGAGAATCGACTTCTAGTACCACAAAAATATCCACTGCTACATCCTCCAT
CAAAGAAACCACAACCCAAGAATCTATCCTCCTACCTACCACCCAGATCACTACAGCTGA
TATCCCCAAGACTACTGAAATAGCCAGCACTATAATCATCAGTATAAACACTGCAGATTC
GAATAATGGAGCTGTAACTGTATTGACCATCATTCCTGTTACTGCTGGTTCAGGTTCAGG
TTCTGGCAACGACATTGGCATTACCAAAACCAATGATGGAAACAGCGGCGCAACCACATC
CATAACCATCATCAACACCAGTCCCACTGCTACCACAACAGCCGGAGGTAATGGCCTAGC
GCAGACTACACCTACTCTTTCGCCCACTTCTCCGACTCCCATACGCACGTCTATTTCTAT
ATCTACAAGTGCGATAGATGATGGGTTGAGAACAACGACGTTGAGTATTTCACCACCGAA
GGAAACGATTATTACTAGTGCGCCTGCAGTGACGACTACGAGCGCGGCAGAGAATATTTG
TTTGGGGGTGGGAGGGGATGGGAAACTTACTAGTATGAGTAGCTGTGTGGGTGGCGCGAC
GGAGACGGTGAGTGTGACGGTTACGGCAAGAGAGACGGTTACGGTTAGGGGGTAGAGTAT
GGGGATGAGTGATAGGGGTGTCATTGGGGAGGGTGGAGTGGAGTGATGAAATAAGTGAAT
GAATGAATACACGAACAAAAAGTGAAAATGAGGGGGAGGGAAAAGGAAGAGAAAAAATTG
ACAACTTGGCGTTTGGATATTGGATATTGGATATCGGATAGATGGGGCAGTATGTAATGG
ACCGAAGGAATTGAATTGATTTATTTAGAGATTTCATGTTATGATGGATTGAAGAAAGAA
TTGTGTGTAAATCGTATAGGGTGATGAGAGCTTGAATTACTACAAACCTTATTGGAAATT
TTCAATCTTTTCTTG
>eecc58fc-621a-4542-82e9-3f7dcf2d50e6 (mRNA) 1420 residues [Bfab07:412317-413736 - strand] [genomic] name=Bfab07g01100.1
CAAAGTGAAGAAGGTAGAGTCGAGAGAAGGAAATCCGATTATACAAACGTCATTAGTTCA
ACACAGTCAACAGTACGAACAAGTCAAGTGCCGGTTTATAAGGTTGCCTGACATCCATTA
ACTGTGCGACTTACAAAATACACCATATTCTACATTCGGTTTGAAAACAGCAACTCTATC
ATTTACCTTTCATATCCGCATTACACTGTTCACTTTTTGCATACCCACGCTCTCCGTTCT
TCAAAATGGGTTTCAATCAACGCATATTACATGTATTCAAGCGCAATAGATCATTTACAT
ATGCAGAATTAGACCCCTCACATGTAAGCTCGGATAACGAATATCAAGATGAAGATCGAC
TTCTGAATCGCCTTTCTGTCGGCGATGATTCATTTGAACATGCTGAAAAGGGAGAAACTA
ATTGCTGCCATAGGCATCACTCATTTGTGAGATGTCTGGGCTGGCTGAATGGTCTTTTCT
TTTGTCTGTCTTTGTACTTGTTCACCGCTGCCATGCTTAATTGGAAGCAAGTCCCAGGTG
GAAGGGAGCGAAATTGGGCGTTGAAACAAGTTTCAGAAAAATGTAAGATCCAAGAATTCT
CCAGCACTGAAGATTTATCTCATTAAAAGACCCACAGCTCCAATTCTCGACGCAATCGAG
ATTCCGCTTTCAACCTGGCGACTCAACGGCACATTTCTAGAGCGCGAGGACGAATCCATC
TATCGAAAACCCCCATCTCCCGAAGTCGATGCAGCATGGGCTCGTATCGAGACACAAAAT
CCCATTCCCCTATCCCGACAAGATCTTGTCAATCAAGGAAAAGATCCAGATATGTACGCC
AAATTTCCCGAATCTTTTGGTTTCGGCCCTGACGCCTTCATCGGACGCATCGACGTCTTT
CATCAAATTCACTGTCTCAACCGATTGCGTATGCATCTCTATTGGAACGTAGCATACTAC
TATCCTGACGAACAGATGGGAAAATACCACCAACTGCACGCTTCGCATTGCGTGTATGCG
CTGCTGCAGAATCTGATGTGTCAGGGAAATGTGGATACGTATGGTCATTACTGGGTGGAT
ATGCAGGAAAATGCAGTGCCGGATTTCAATATCAATCATAAGTGTAGGGATTTTGAAGCG
ATACTAGAGTATCATGATGAGATTGCGGTGCCGTTGGAAGAGTTTGGGGCGTTGAGGAGA
CCGCTGAATGAGCCGGTTAGACATATGTCGCATGAGGCAAAGGAGATCTTTAGGTGGTTT
GATAATCATGAGGATGATGGACAGGATGGAATGGAGATTTTGTGATGGATTAAATTTGGA
GGCGAAGGATATTTTTTGTGAGAATATAGGGTCCTTGGAGTTAGATAGTGGACGAGAACT
TTGGATAATGTGCATCGTGCTGAGGAAAAGTCGTCTCTAT
>05e629e6-a875-4d1b-9122-363e2d744ea3 (mRNA) 2441 residues [Bfab07:417823-420263 - strand] [genomic] name=Bfab07g01120.1
TTCCTTCCCTTCCCTTCCCTTCTCTTACCTTCAATTCTTCCTAATACTTTTTATTCAACA
CTTGTCGTGCCGTACAAGTAGCAAGTATCTTCTGACAAGACTCTACAGTCAACCGTCAGA
CTGATATTCTTATAAGATTGCGCTTCATATCAATCTTCCATTGTAATTGTTACTTGCGAC
GGTTGTCATTACATTACATTTTGCGTTGGGCACACATACCACGGCGAACAATCATGGCGG
ACGTGGTACAAAACATCACTTATGCCTCACCCGTGGCAGATGCAAAACTTGCGCAGATTA
TTGGGCATCCCCAGCTCAATAGCTATCTAGCCAAGCTGGCAGAGGTCAGCGCATGGCAGA
TTGTGCTCACGATTCTTTGCCTGATGGTAGCGTATGATCAGTGTAAGAACCTTCTCCACG
CGTCGATCAATCAATTGCACCACTAACAACTTTACAGGCAGTTATATCTGGCAAAAAGGT
TCAATCATCGGTCCAGCATGGAAAGCCCCCTTTATCGGTCCATTTTTACAGTCTGTCAAT
CCTAAATTTCACGAATATCAAGCAAAATGGGCAAGCGGCGACCTCAGTTGCGTATCTGTT
TTCCACAAGTAAGTCAACACCATGATCTGCTACTCGGAGATTGGGTCCTAATCATTGCCA
GATTCGTTGTCATTGCTTCTACTCGTGACATGGCGAGAAAAGTTTTCAATTCCCCAGCAT
ACGTCAAACCATGTGTAGTCGATTCAGCACATAAATTATTGGGCGAGACCAACTGGGTTT
TCCTTGACGGAAAGGCCCATGTTGATTACCGAAAGGGTCTCAATGGATTGTTCACTCGCA
AAGCTCTCGACTGCTATCTCCCAGGACAAGATGACGTCTACAATCAATACAATGAAAGAT
TCGCCAAGGTTACCGAGGAAGCTGGAGGAAAGCCTGTACCATTCATGTCCGAATTCCGAG
AATTGTTGTGCGCCGTTTCCTGCCGTACATTCGTTGGTTTCTATATCTCAGACGAAGCTA
TCAAGAAGATTGCGGACGATTACTACAACATCACTGCTGCCTTGGAATTGGTCAATTTCC
CAATCATTCTCCCATTCACCAAGTCTTGGTATGGAAAGATTGCTGCTGATATGGTTCTCG
AGGAATTTTCCAAATGTGCCGCAAAGAGTAAGGTTCGCATGGCTGCCGGTGGTGAAGTTT
CTTGTATTATGGATGGATGGATCAAGTCTCAACTCGAGTCTGTTGCTTGGATCGAGGCAG
AAGCAAAGGGTTCAACTGAAGGAATGACAAAGCCAACACCGTTACTCCGTGAGTTCACCG
ACTTCGAAATCGCTCAAACCGTCTTCACCTTTTTGTTCGCTTCCCAAGATGCTACTAGCA
GTGCCGCCACCTGGTTATTCCAAGTTATGGCTCAACGTCCTGAGGTTTTAGATAAGGTCC
GTGAGGAGAACTTACGCGTTCGTGGTGGCGATAAACGAGTTAGACCAAACATGGATATGA
TGGAAAGCATGAAATATACTCGTGCCGTGGTTAGAGAATTGTTGAGATGGCGCCCTCCTG
TTCTCATGGTCCCATACGTTGCGAAGAAAGCATTCCCAATCACCCCAGATTATACTGTTC
CCAAAGGTATGTCAAGCTGACACAAAAACTAAAATCCAATTCTAACCACTGAAATAGGAG
CCATGATTGTGCCAACAACATACCCAGCTTTACGCGATCCTGATGTATATGACCGACCTG
ATGAATTTGATCCCGAACGTTATTTCTCTGGCGACGCAGAAGTAAAGGGTGCTAAGAACT
ATTTGGTCTTTGGAACTGGTGCTCATTATTGTCTGGGACAAGAATATGCCCAAATGAACC
TTGCTCTTATGATTGGAAAGGCATCGATGGAACTTGATTGGGTCCATCATCCTACTCCAA
AATCAGAAGAGATTAAGGTCTTTGCTACAATTTTCCCTATGGTTAGTACAGATCCACATT
GAATGGCTCTTGATCCTTACTAACACAATTTACAGGATGACTGTCCATTGACCTTTACAA
AGAGATCTTAATTATCTTGATATCTCTATTCGAAATTTCGAAATTTTTCATCAATCTTCA
CACTACCTTCTCACCATTTTTTTTATTATCGGAGCGCCAATCTCCGCACACTAGGGGCAA
AGTTGCGGCAGTAAGGTTATGATCATTTTAATGCATTAGACTGGGCGTTCAAACATTTCT
GTCCATTAAATATTAGGGGAAGGATAGGCGTTATTCATGAAAGTAGTAATGAAGATAGGG
ATGGAAGAGTTGGCTTGTGTAATTTCTCCAGCCTTTGACGAAGAAAGCACGTGAAACTCA
CCAAGGATACTTAATCAATTGTAATTAGTCATTATCTTTTGTTTTCAAAAGAGATGAGAA
GGGAAGCATGAGAAATGAGAATGAAGATCCATTTGGACTGC
>479352d8-cb9c-46b9-910b-6b25ed626d6a (mRNA) 927 residues [Bfab07:427165-428091 - strand] [genomic] name=Bfab07g01130.1
CGAAATCCAACAAGGATCGCTAGACGTACCTAAAATCCGGGGTAATATTTCATCCCTCCA
TTCATCCCACCATCAAAACCAAACCTCGAATAGAAAGAGAGCTTTTCCAAAACCCAACCT
TCCACACCCTCGCAGTCGTCAATTGAAGTGCCCAGCACCGAATACAGATCCTGTCTTCAC
AACTTCGGCACCAAAAACGAAGAAAATATGTCTACCCCTCGAGTATCTCGCACATTAGCC
CGCGCGTTCCAATCGCGCATGGGAGCTTCGTCTGCAAAATGCTATACCATGTCGCATTTC
TCCACGAGCAGTCGCAACAGTTTTAGTGCTCAGATTCGAGATGGCGGGTTGAAGAGTACG
GGGATCTTGGGTCGGGAGTCGGCTCGACATTCAAGACAAGTTCGGTCGTATTCGCAAGAA
TCGGAGGCGAAATCTAAATACTACACTTTTGAAGACGTGCGCTCTCCTGCTGCCCGTTTC
TTCTTCAATGGAGTTTTCTAGCTTACTCACTCACTTTTTCTTTCTGTAGATGCAAAAACT
CACGTCTGCTCCACATCCCGATACTCACATCATCGATGTTCGCACACCCCTCGAAGTGCA
GCAAACGGGACGCATTCCCAGCGCGGTGAATATTTCCATAACGTCGTATCCGGATGCGTT
TAGTATTAGCGAAGAAGAATTTGAAGATCGCTTTGGGTTTGAGAGGCCGGGGAAGGAGGA
GCACTGTGTGTTTTATTGTAAGGCGGGGGTGAGGTCTCGGGCGGCGGCCCAGATTGCGAG
GGGGAATGGGTGGAGCAACGTAGGGGAGTTTGAGGGGAGTTGGGGGGAGTGGAGTGCGAT
GGGAGGGGAGGTGGAGAAGTAGGATGGGAGCGGGGGAGGGGGTTTGGGATTGAGGGTGTG
GAAGCTGTGAGAGCTGGAGTGCTGGTT
>5bf7d6bd-2148-41d2-9162-f455f729fcd7 (mRNA) 1364 residues [Bfab07:428467-429830 - strand] [genomic] name=Bfab07g01140.1
CGCAAGCTGTCCCAAGCTACAACACCGAACACCACTCATGCAACAATTCTCGCAATATTA
AAATCATTCTAGTTGCAGCAAAACAAAATGTCAGGAGCTGGATATGATGTCGTTGTCGAT
GTGGATGAGGAAGTATGTTTCATCTTTTACTTCCTCCAGGACTCATTTTCCTGTCTTCAA
TCAACCCGTTTTCTGATACTAACAAACCCAGGGCGATCTAGGCCACACTGATCTCCAAGA
AGATCTCTCCTTCCACAATTCCAATTTCGAAAACAATCCATCCTCATCCCGCCATAAGCC
CACATCGCCTGGTCTCCCCGCTCCAGCAACTGCAGGTGGTCCCAATACCTCGAAACGTTA
TCTCTGGTCCCTACATTTCTACTCACAGTTCTTCGATGTCGATACTTCTTCCGTTCTAGC
ACGATGCTGGGCAGCTTTATATCCTCGTGCAAATTTCTTGGATGTGTTGGAGGGGAATCC
GGACTTGTATGGTCCATTTTGGATTGCTACGACGGTTATTTTTATATTGTTTATGGGAGG
AACGGTTAGTTTGTATCTGGCGGAAAGAGGAGAAGGAAGATTTGCATACGATTTTGGGCT
GTTGAGCGGTAGGTTCTTTCTTTTGCTTGCGTGGAAATTGAAGCGCATTCAAGGCTAGAG
AAAACGAACATAAAACTAACTCGGGTTCTTCAACAGGCGCCGCAGGTCTAATCTATGGAT
ATACATTCGTAATTCCGATCCTTCTCTTCCTAGCCCTTAAATATTTTGGCAGCGAATCTG
CCAATCTTCTCGAATGCGCCGCTCTTTACGGCTACTCCAATCTCGTATGGATTCCCGTCG
CATTGGTCTCCTGGTCATCCTTTACAATCATGAATTGGGTATTCGTAGGAGTCGGATTTG
GGTTGAGCGTTGCTTTCCTCCTTAGGAATTTATATCCAGTTCTCAGCGCTACGGATAAAC
AGACAAGTAAAATACTACTTATCTTAGTGGTTGTTCTACATGCAGGTTTGGCAATTGCTA
TTAAGGTGTTGTTTTTTGCCCATGGAAGTCCGGTAGCCAAGAAGCCTGAGGCGGAAGACC
CTGCCAAGGGGGCCGATCCAAGTAGGATGTTGTTTTAAAGTTGGGGATATCTTGAGAAAC
ATTTTTGCCTGGGGATGAAGGGTTGAGAAGAGACTGAGTAAAGGCTGGCCCGAATCAAGG
GGGGATGAATATCTTCAAGGAGTATAAGTCATTCCAAAATCAAACAAATAGATCGATACC
CATTATCATGTACAATATATCATGTTAACCTATTGCTCACTGTGTATCAACCTTCGTTTG
AAGTAATCTGCCTCCCTTCTATCATGGATGTACAATACACTTGA
>4a5b5cf9-1a15-42a5-a59a-8fff1710578f (mRNA) 2282 residues [Bfab07:431736-434017 - strand] [genomic] name=Bfab07g01160.1
CACCCGCTTCTAGCGTCGATTTTTCCACCTAAACGATTCCCGGAAACTGGGCACCCGATT
CCATGTACTGAATGTGTCACTGGAAGTCATGATTCGAGAATTGCCAAAGTGTTAATCTCT
ACTATCAGCTATGTCATCGGCGATTGATTATCATAAGTTTCGCAGAGGGGAGACATGTAG
TGAAGAAGGATGTCGCGCTCGAAAATTCTATATTGAAGATGGTAAAAAGTTTTGTCAACG
AGGCCACGAGCAAGCGGTTTGTAGACGACGCTTCCAGACCAAAAGTATCACAAAATAACA
CACTCTAGGGTTTTACGCAAACTCAACAAGATGAGGATGACTGGAATCAACAAGGAAAGA
AGTCAAGAAAGCGGCGGGAGGAAAAGGAGCAGGTGGAAAAAGTTTTCGGGGGTCGTGATG
CCACACAACTCTACTTACAATGTTACCAATTAATTCTTTGGAAACAGACCCACTGGCTAG
TGACAGTGAAGGGCTTTCCAAAAGAATTAGAAACTATCGTAAGAGATTTGTGGGAATTGA
GACTGAGAGTTTTACAAGGTTCGGGAGATGAGAGAAGTGAGTATGGGACGGAATTTGGGT
CAACGACAGAAGGAGACGACACGGATACGGATGGGACGGGGTATAGAAGTACGGCTTCGA
CTGTTATGAGTAGGAAAAGAGCATCTAGGGCCAAGAAGAATCTTCCAAAGTTGATTGAGA
CTCTGGGATTTTGTTACCTTGGAATATTGCTTTTGCGATTGCCAACAAGTTTAGGGGAGA
TATACAGATGGGCAACCAGGGATGAGATTCTTTATACTCGAGCGGTAAGTGAGGTTCTAG
AATATAGATTCCTATTTACTAAACGAATGCAGATTAAAGAAATACCTAAAGAGATGAGAT
CTCGATTACCAGGTCATTATTTCAGAGCACTCGAAATCCATGGTATCTTGAATGGGCATA
GACTTCATCAGACAGTACTTGACATGGTTTCTTTTTTCAATTTCAATTTCGAAATGGTGT
TTCCCCCAATAAACCACAAACTACTTCTATACAAGAGTGTTAGAGATCTGGGTCTCACAG
GTGTGTTCTCAATCTCAGATTCAGAGTTTCATTTAAATCTAAACTTTCTCAGTTGACATT
TACATGGCTGTAAATCATCTTGCTGAGATTCTGGAATACAATTTTTCATACCCAATCCAT
AACAAGCGGCTACATGGAACAACTGGATATCCAGAATATCAACTCGCCAGTCTGATAGTT
ATTGCCACAAAACTCAGCCAGCCATTCGATGACATACAACGTCACCCAGAAGGCAATCTA
GATGCCACAGCTGCAAGAATCAACTGGGCTAAATGGCAAACTATTATGTTCAATAATCCG
ATTGAAGGTATGAAGCGTGGAGACGAGATCAAAATTACAGATGCAGACGTTTTTAATATG
ACTGGAGAACAAATGGATGACTGGATGGATTGGTATCACAAAACTTGGATCGATGATAGA
GATCAAAAAGGTGAGCAGACGCTACATTAGTTGAGTATGCTTTTTACTAAGGTTATGAAC
AGTTCCTCAGCAGATTTTAGAGCTCTTCCCATTGCCGGATATTATACCTGAGACGACAAT
GGGAATAGTTGATCCCGATCCAATCAATCGGGCCAAGGAAGTTCACAAAACATTGACCCT
TCAAAAGCCAGTGGCTCGTGTGGACGATGGAGGATCCCAAGATATTGTTCGTCCAGGTGA
GAAGTATAGAAGATACCGGACAGTTGAAGAATTACCTGAAAGTGCCAAGGCCTTTTTTGA
GATTGCTGGTAAGTTGCTCTTCTTAAATGATGTCTTCGTGCTCTCATTGACTGATGTAGC
GAGAAACATTGGAACTTCTATTGAAAAAATGGTACACGGCGTTTTTACTACAGAAATCCA
ATTAGAAAAATGGATGTTGGATGAACGTAGGAAAGAGTTGTTGGAGCAGGAGAGCGAGGA
AGAAAGCGCTGCTCAGGAGATGACACATGTCGTCGGGATGGATCGCGAAGTCGGGGAGGA
AGAATTCGATGAGGGCGACGTTGATTCTCCTTTGAAAGAGTGAACATGAAGCAATTGGGT
TCCTTAATTGGTATGCGATTTTCGAAGGACGGGTATAGGTAATGGTTCTGATTCGAATGT
ATTGGAAAAGGCTCCAATCTTGCTTTGAAATTGGTGTTTAGGATTTATTATAGATACCCA
AAGATATAAGTTAATGGAATCTTCAGACTCGACAATGTTTACATCAATAAATCAATTCTT
TC
>52971f1d-ced7-4fae-bb14-41d1e7e07e59 (mRNA) 1214 residues [Bfab07:434095-435308 - strand] [genomic] name=Bfab07g01170.1
TCTATTCTTCCTCGAATTTATAAATTCTTCCACACCTCCTAATCTTTTCGCAATCATTCT
CATCACGACTCCTCAACTCTATCAATTTTTATTCTACCTCCCCAAATCCCCCCCCAATAC
CTCTCAAGATGTCTGGAGAAGCCCCAGTTGATGACTCTCAAGTAAGTTTGAATTTTGTCC
TTTCTTTTTGTGTGTTGATTTCACCCCGCACATGCACTCTTTCCCCCCCCGCACCAAATT
CGCTTTGCGTGCATATCAACCAAAATCAACGACGACGAAGACGATAAAAACCTGACAACT
GACCATTATTCCTTTTAATAGCATGAGCACACCTTCGATTCTGCCGATGCCGGTGCATCT
ACCACCTTCCCCATGCAATGTTCTGCCTTGAGAAAGAACGGCCACGTCGTCATCAAGGGC
CGCCCTTGCAAGATCATCGACATGTCTACCTCCAAGACTGGTAAGCACGGTCACGCCAAA
GTCCATCTCATCGCCACCGATATCTTCACCGGAAAGAAGCTCGAAGAACTTTGCCCATCC
ACCCACAACATGGATGTCCCTAACGTTTCCCGTATCGAGTACCAATTGGTGAGAATATAA
ATACATGGTCAATTGTTGGGCGCGTTCGCTAACGAATCTATAAAGCTTGACATCGATGAT
GATTTCCTCTCCTTGATGTCTGAGGGAGGTGATACTAAGGATGATGTCAAGTTGCCAGAT
GGAGAGGTCGGACAAAAGATCCGTGCTCTTTTCGACTCTGACAAGGACACCAGTAAGCAA
CGCATGATGGGAAAATTTCTAAAACACAACTAACAAATTCTTCTAGACGTCATTGTCCTC
ACTGCTATGGGTGAGCAACTCGCTATCGATGGAAAGGAGGCACCAAAATCTGGTTAAATA
TCTGAAAAGTAATATCACCGGGATTTTCGCAATAGCATGGGTTGTTTTGCGTGAATATCT
GTTCGCTCGAAGGTCCTTTAAATTCAGAGGAATATGATGCTTTCGGATATCTGCATTCTT
ATGGTCTACGTTGGGGCGATTTGATCTACGAAAACTTGGTCATACTGGTTATCTTATCTC
TCCTAGCTTCCCCAGTATCATAATTTCATAGCTGAATGCTGTTTTATGGTATCCTTGACC
GGCGTAGTCAAGCGGGCATGCTACATAGTTTGTCTTCACGAAATAAAAAATTATCTCCCA
GTTGTCAAGAATCT
>70481d4d-06f5-411b-a84b-65b48c317d70 (mRNA) 2534 residues [Bfab07:435972-438505 + strand] [genomic] name=Bfab07g01180.1
CTCGTCCGTGTCGAGATGTGATGCTTGAGTCATTTTCCTGGTATAGCTTCTGCAATCGAG
GTAATTATTTTCCATTACTTCGCTTTGTTACCTATTTCAAAGCTTTGGCTGCTGAGGATG
CCATGTTCGATAATCTGGTCTGTTCCGTATCGATAAGCTGAAGCTCCCTTTGGTTCACAC
TCTACTACTTGATTCAGATTACACCAGGAGTAACACCTCAAGTATTCCATATTAAATACA
AACCTTTCCCATCTTAATCTATTGTTGGCGCATGGGGAGAGGAATTCATTGCTTTGCTTT
TTGGCCATCAGGATGTGGTCATTAGATCGATTATCCGGACACACAACACCGTCTGCCTCT
CCACCTCCCCCGTTAAATAGGATCCCAAATCTCCCTCGTCGTCCGAGTCATCTTGTGCCA
TCCCCAGTTGGTGGTAGACCTCCTTTCAACCCAAGATCGTCTTCCCTGTCGTTAATCTCC
AATGACTCTAATTCATCGTTGCTATCATCACGGAGACCCAATGGTTCGAATCTCAAACAA
GCAGTCACATCTCCGAATGTGCCAGATCCTTTGGAGGTTTTGGGAACACTACTGGATAAT
GGGGAAGAGACAAAATTGCCATCAGCGAAAAGCCCGGGGGCGACAAATGGGACAGTTGCT
CCCATTGAAGAGGAAGACGATGAAGGCGAATGGGATTTCGGAGGTTTAAGTCTGCAACAC
ATTGTAGCAGGAGAACCTCTCGATGTTGAGGATGAGCATGTGTATAAATCTCAAACGCTG
GAAGAATGTATGTCTGATACTTCCCAAATTGCAGTGCGCAATTGCTGATAGCTTCAACAG
ATGAGCGCGAGAAAGAGAAGTTCGAAGACCTCCATCGATCAATTCGCGCCTGCGATGACG
TTCTTAATTCAGTCGAGATAAACCTCACAAGCTTTCAAAACGACCTTGCTATGGTATCTG
CGGAGATTGAAACTCTGCAAGCACGATCGACGGCTTTGAGTGTAAGGTTGGAAAATCGCA
AAGTAGTAGAGAACGGACTTGGGCCTATAGTGGAGGAGATCAGTGTCTCTCCAGCTGTCG
TTAAAAAAATTGTGGATGGAGCTATAGATGAAGCTTGGGTTCGAGCATTGGCGGAAGTTG
AGAAACGATCAAAAGCAATGGATGCTAAATCGAAGGAGCAACGTACTATAAAGGGCGTGA
ACGATCTTAAGCCTTTACTGGAGAATCTAGTTTCCAAGGTAGACTCGCCTACTCTGGTCT
CTCCTACAAATATATTGACTTTAATATCTAGGCATTGGAAAGAATCAGAGATTTCCTCGT
TGCTCAAGTGAAAGCATTGCGATCGCCCAATATAAATGCACAGATCATTCAACAACAGCA
CTTTCTTCGCTATAAGGATTTATATGCATTCTTGCATAGACATCACCCAAAGTTGGCTGA
GGAGCTTGGTCAAGCATATATGAATACAATGCGATGGTACTTCCTTAATCAGTTCACGAG
GTATTTGAAGGCGTTGGAAAAGATCAAGCTTCATGTGTTGGACAGATACGATGTGCTCGG
ATCAGATGACGGGTCTCGTAAGGCTACTCTTCTTTCAGGATCCAAACAGACAGGTCCACC
GCACGACGCATTCAATCTAGGTCGACGAATCGACCTTCTCAAGACGCCAAACCAAACTGC
ACTTCCCTCTTTCCTAGCCGAAGAAGACAAACAAACCCACTATATGGAATTTCCTTTCCG
TAACTTCAACCTCGCACTGATTGATAACGCTTCCGCCGAATACTCCTTTCTTACCTCTTT
CTTCTCTCCCTCTCTAAGCTACGCTACCATTTCCCGACACTTCAACTACATCTTCGAACC
CACTTTTTCCCTCGGCCAATCTCTCACCAAATCCCTCATCCACGAGTCCCATGATTGTCT
CGGCCTCCTCCTATGTGTGCGCTTGAATCAACACTTTGCATTTTCCCTTCAACGCCGCAA
GATCCCCGCTGTAGATTCCTACATAAATGCAACATCCATGCTCCTCTGGCCACGCTTCCA
ACTCACAATGGATATCCACTGCGAATCCGTCCGCACCCTAACATCCGCTCTCCCTACCCG
CAAACCCTCAGCTTCGGAACAAGCTAAACAATCTGCAGCTCCACACTTCATGACCCAACG
TTTCGGTCAATTCCTACAGGGTATCTTAGAATTGAGTACGGAAGCGGGAGATGATGAACC
TGTAGCGAGTAGTTTGGCAAGATTGAGAGGCGAGATGGAAGCATTTTTGACAAAGTGCGC
GGGGGTTATGCCGGATAAGAGGAAGAAGGAACGATTTTTGTTTAATAATTATTCGTTGAT
TTTGACAATTGTAGGGGACGTAGAGGGTAAATTAGCCGGGGAACAAAGGGCGCATTTTGA
GGAGCTGAAGAAAGCTTTTGGAGATGGTGTCTGATCCTTCACTTCATTTTGATACTTAAT
TGGAAGTTTTTGAGCGTGTACACTTATCAAAGCGTATTATTTGATCATCAATTTTGTATT
TGTGAAGAGAAACA
>33f2599a-839d-4543-b030-0bdcf791a799 (mRNA) 1836 residues [Bfab07:438467-440302 - strand] [genomic] name=Bfab07g01190.1
CGTACCCTTTTCAACTGGATGTCATATTTTGGTTATCATATTTTATCCGACATGGATTGC
AAAGAATCCCTGACTGAAGACGGGAAACCATCAAGGTCGCTTCTACTCTATTTTTACGCG
AAGCTATGAAACTGGACAACAATGGAAGGGATGCTCTGCGAGCCTCACTACAAGTGACTT
ATTGGCCCTTTGTCGGATTCCCTTTTCCGACTTTACAAGAGGCTATCATGATAATTCGAC
TCTCGAGATTTCATCATACTCAACATGGAGTCTAATGAGCAGCCCATCAAGGAAGAGAAG
TCCTCGGCAAGCTCCTCAAGAGCCTCGTCCCGCTCCCCCTCACATTCCATCAAAGAGAAG
CAACCACGAGAGCCTACTGAAAAGGAAGTAAAGATCTTGGAGGCGTGCAAATGGAAGGAT
TTGGAGGCTATTAGAGAATTAGCAACATCGAAAGATGGCTTGATCTCAGATGAAGTTCGT
CGTCAAGCATGTAAGACGTTCAAGCTCCCCGAACAGACCTTGCAATTGGATATTGACAAT
GAATAATAGGGCCTATACTCCTCGGTTGTGACGATAAACACGGCGACACAAAGGGCAACT
TGACGAGCTGGAGGGAACTGCCAAAGCATGGGGATGAGGATCAGGTTGCTCTGGATGTCA
ATCGGTCTTTCATATACTACCCAAATGGTATGGTTACGGAAACACGACGAAGCAGTATAG
CCAGCACAAGCTAATTGTTACCCAGATCAAACCTCGAAAGAGATTGGCCATAGGAAGGAA
GAACTTTCTGACCTCATTATTGAAGTATTACGTTGCAATCCTTATCTCTGCTACTTTCAA
GGTTACCACGATATCTGCCAAGTACTCCTTCTTGTTCTCCCACCTGCTACTCGCACCCCC
TCAGTTGCCCGGCTTTCTGCACTTCGAATTCGCGACTTTATGCTTCCAACTCTATCCCCA
GCTCTCGCACAACTTCGCCTCATTCCATCCATCATAAATACTGTCTCTCCTGCTCTTTGC
ACTCACCTCTCGCAAACCCAACCATTCTTTGCTCTCTCGGGCACCCTTACAATGTACGCA
CATGATATACAAGAATATGGTGATATTGCTCGACTTTTCGACGTTTTATTGGCACGAGAG
GCTGTCTTTTCTGTTTACATGTTTGCACAAATTGTCCTTTCACGCTCCGAAGAGCTTTTC
GAGACACCTGCCGATGAACCGGAAATGTTACATTCCATACTTTCGAAACTACCTAAACCT
CTCGATCTCGAATCTCTCATTTCCAACACTGTCAAATTATTTGAGGAGCATCCGCCTGAA
ACTTTGCCCTCCTGGAGATGGATATCTTCATCTAGCGTCCTTAAAACCGCTCGTTGGTCT
GATCAGATCACAAAACAGAGCCTTTCAGATGGCCAGAGGTATTTTGCGCAGCAAGTCAAG
GAATTACAATGGGCTGCGAAGCGTGATGAGCTGTTAAAGATGATGTGGAGATACAGACGG
CCTGCTAAGGCTATTGGTGTTGCAATTTTGGTCGGAATTTTCTCATATCATTGTTTGCCT
AGGTCAAATGTAACAGGAAGACGCTGGACGTCTGCAGTTGGACTTTTCTGGGAATTAATG
GGCGGGGGTTACAATGTCCATTAAAACATAGGATGGGTGGGGTCTATTGACTGTGTATAA
GGTCTCGGGGGCATTGGGAATGGAGTATAGACGGCGTAATTAATGGTTGGGTGGAACATG
GTTTCTTCCACAGCATAGATTATTTCCGGCTCTATTTCTACCATAATAAAAGTTTTTTGT
TTCTCTTCACAAATACAAAATTGATGATCAAATAAT
>c9f6564f-b43f-417b-928d-979973666344 (mRNA) 5425 residues [Bfab07:440399-445823 + strand] [genomic] name=Bfab07g01200.1
TCAATCAGCCTTGTTTTGTAAAGGCTAAATACAAATACAGAAGTCACGATCAAGGTCGCA
TTCCTACCCAGCATCCAGGCCATACATCAGATACTGGACCGGTAAATTTATATTGACACG
ACGATTCGTGCTGGCCACGGCATTTCAGATTCTCAAGTGGTGGATACAACTGTTAGACGG
TGCATCTGAGGAGCATGATCGGAATACCAGCACTTGGAAGCAGCCTCAAGTATCAATATT
GTCCTTACTAGGTGGTCATGGATGAATAGGCTCGCTCGTTCATAGGCCAAACTTTCATGT
CGTTCACCGACCTGGGTATCATTATCGGAATATTACTGTTCTGAGGCGCCTCCAACTATC
AATATTAGTATTCTCCTCCCTACCCTATGGTCAAAAGTCTAAAAGAAAAGTTCCCGAGGC
TAATGAAACCACCAATATCTGTCCAATATCATTGATCAGTCCCCTCGAAGCTCACACTCA
ATACCTAAGGTCATCGCTCATTCATCATCCCGCCTTTTATTCAATACTTATTACCAAGTA
CCTCTCGATTAGGTTTGCATATACGAGGTACGCCGAGTCTTCCTTATTCGGATGACAATT
GATTGGCAATCAATCTTATTTGAATTGTCCCCATGGCCTTTCCTTTGCAAACACAAGTCT
TGGTTGACGGACAATGGGTTACCAGGACTGTCGATACCCATACACTGCTTCAACGCTACA
ATCAAATGGATGATAGAGAAGTTGATCATACCATGGAAACGATACGTCCTCCAGTCCGTG
GAGTTCTGACTCAAACAATCGTTCCCAGCCCTCTTGTACATTGGATTTTGCCCATTAGGA
TTCGTGGTCAGGAGTATAATGATGTAGCATATATTGGAGTAAGTAAATGCAGCTTTCGTT
TATCAGGCTGTTGGGATGCATGCTGGTGATGTTGCTTTTGTTCATTGTTGTTAGTAGTTC
TTTGATTACCTGTGGTAGAATTGAACTGTCGTCGCTGAAGTTCTGCAAGCATCGGAGAAA
ATCATGCGATGACGGTGACCCAGAGCCTATCAGGAAACAGAAACATCTAATATAATCAAT
TATTAGAGGCAGTCACGATACCCAATGTACTCACAGTGTTGGTGGGCTTTCATACAATTG
CAAACGTTCGAGGCTTAGCAGGTATTTGTAGTGCCTTGTATACTTTCTATCTTGAGCATG
TATGAGGATATCAATAAGTCACTGCGAAATCTGGCACCTGTTTCTTTCATGGGATGATAC
CCATTTTTCTTCGAATGGCCGCTAACAGAATCAGGACACATTTGTTGAGATTAGACGATT
AGGGGTTGGCCCGCATCTATTCGAAGTCATCCGAAAGGATGACTTTGGTTCCAGAATTCG
CAATGCGACTGTCCTAGGATCGCTCGAAGACTACGAAAAGGAGCAAGTTTGTGTCAAAGA
GGAGTACGAAGACAATGACATGATCAACTTTTCGACATCGTCAGACAGCCCATCATCTTC
CAAGTCACTCTTGCCTCCTCAGACTCTAGTACTACAACTCGAAACGGATACGTCTAGCGA
TTCAGTCTTTTTAACGCTGCATCAATCCGGCGATGGATCATGGAAGTTTAAGTCTAGCAG
GCGACGGTTATCCAGAGCGATGGATAAGCTCCAGCCTGGAACACATTTATCAATTGACCC
GAGTTCAAAATATATGGTCATAGGTTGTTCTGAACAATGTTTTACAGTGCAGGCATTGAA
GCCAAGAACGGAGTTGAGTCTTCAACATATCAATGGAGAAGAACTCCAGTTTATCGAGTC
TGAGAAGATCATTCTCTGTAAAGGAGCAATTTTGAAATTGGAATTCCTTCATCCCCCAGC
TGGATCCGACAATGACGTTATTCTGCTACTGATCGTAACCGTGAATGGCAAGATAAAGAT
GCTCATATATTCATGGAGAGCTGGGGATCCTCTGTCAACCATTAAATCGCGAAATTCTAG
AGGTAAAAAAGGCTATGCCTTGATGGAGATGCCCCTATTGCTCATACCTTTACGCTTTCA
ATCCGCGTTTGTTCTAGTAAACAAGAATTCCATGGTGGCTTACAAAGGCATCTTGGAGGG
CGCACCTGAATGCATACCAATCGGAACCTCTCCAAGGAAACCCCTCGACCTTTATCAAGG
CTCAGACGTGCCCTTATGGGCAGCCTGGGCAAAACCGACTCGTTTGCCCCACTATATAGC
GGAATATGATGATATATATCTCGCTCGAGAGGATGGATGGATCTGTCTATTGCAGGTGAA
TCACGATGGAGAAGATCTTGATCTTGCTATAACCGACGTTGGCGATATGCAATGCAATAT
CGGGAAAGCTTTTGCATGTGCAGACTATTCACTCGATCCGGATGTTCACCGCCATGGTGA
TGTGCTTGTTTCTGGGGGTGACGCTAGTATCGGAGGAACTTATTTGGTGAGTATGAACAC
ATGGCTTATCATTGCAACAGTGTATTGAAGAAATTTGCCGAGAACTTGGCTGATAATCCA
TTACCATAGGTAACAGCTCGAGCACAACCTAATGTAAAAAAAGACACACAAAACTGGTCA
CCAGCTATGGATCTTGTAGTAATTAGGAAAAATTCAAAACCTAACTCAGACATCAATACT
AGGATCCAAAGCTTTGTTCCTTCGCCAGATTCGATATTTGTTTGCAGCGGAAAAGGAGCA
CTATCATCCATAACAGAATTGAGGTCTGGTATCGAAGCTATTCTTGGTCTGGACCTTGAG
TTTCATTCTGCGGTTACGAAAGCATGGGTTTTAAATTCAGAAACTTACTCAGGTTCAGCT
GGTGGTGACGATTGGGTATTGCTTTCACTCGAGGATCGATCAGCCATTTTACAAATTTCT
CTAGACCGAACGAATGCAGAAGAACTTGACCCGAATCATATAACATTAGATCTGATGAGC
CGGACTATTGCAATCAGCTTCTGTGGAAATCGTGCAATACAAGTAACAGAACGATCCATT
GTTGTTCTCGACTCTGGCAATTGGTATGTCTTTCAGCTTCTCGTATCATGAGTTATACTT
TGAACGATTGTATGGATGTGATCAAGCCTGACCGTTTTCTTAGTACTATACTTAACGACT
TAGATGTGATGGGCTATCCTCAAGCCCCACCCATTTCAGCCTCATTCATTAATGATGCCA
TCATTTGCAATGGAAAGGTATTATTTACCACACATTACGAGGAAAGGCGTCTACTTCGCA
TACTCGATACCGCCATTGATGAGAGTACATCGCCACCTACCATACTGTATTACCCCAAGA
CAGTTATTGAGTGGACCCACGACGATGGAGAAGTAACGTGCATCGCGATGTATCTGCATC
CACAAGATCATCAAGAGCTTATTATTACCGGTAAGAGGAAGGATGGGGAAATCTTCTTGA
TGTTCATTAGACGGGGAGAATTCCACTTACGCGTACCTACCACCTACGAAGGGTGTAGCT
ATGACCTTCGAGCACTGGCCAGTATTCTTGTTATACCCTCGTCAACTCCTGACAGCTTTA
CGTTACTGTGCGGAACACTCACTGGATTAGTTATTTCTTTGGAAATTTCTCAGGTCGGAC
AAGACTTCCACATTCACAGGTCTTGCTGCGTTAGATTCGGAGGCAGTGTGGCAATTTTGA
CTCAAGCTGAACATTCGAGCTACTTGTTTGTGAATTGCGACGAGAAGATTTTTAAGATTA
ATCTAAGTACTGTGAGTAGTGATGGAAACTCTCCAAGGAAGCAGACAACGAGAATGACTA
TCGGAGCGGATCAAATTTGGCTGGTAGATGCACTGAATACTACCCTACAACAGCCTAATA
TTAATTCCATATTACCACTCGAATCTGAATCACTAGCTGATACTGATCTTCTTCTGATAT
CATACAATCGGCTTCTACTTGCCAGAATGGGGACGAAGCAGAAAACGGTACCTCGCCGCA
TCCCCATCAGAGGAACACCATATCGAATCATCCATTCGGAAATTCGCAATGCGTTTGTCG
TTGGCGCTTCTATAGACGGTCGAAGTACACTCTACTTTGTAGACCCTGAAACTGGCGAAG
ATTTATCTGACCCAAGGGTCAAGAAGAACGGGCCACAAACAAGTTTTGTAGCAGGATTGG
GTCGCTTTGATGAGAAAATTCTTTGCATTTATGAGTGGCTGTATTGCCATGGGACTTCCA
TTTGGAATTTTATTGTCGTATGTACCAGTGGAGGTCGAGTCGTGATTGTATCAACTAACA
GTGACGACACTCCGTTGACACATTCTGGTCGAGCTAAGATATCGTTTTGGCAAACGACTC
AATTTAAGAATTTCACTTCTGTGTATTCAGTTGTTGGAGACTCTGAAGGCTTGTACTACT
GTGCGCAAAGCGGCAACGAAGTCAAATTATACTACAGCACGCTGAATAGGGCAGAAAGAA
AGTTTAATGAAAACGTGGCAGAAGCCAAACTACTTTCACCAGCAACTTCACTGTCTTATG
ATGCTGGAAAGATATATGCTCTCACCAGACATCATTCTCTACAAATTCTAGAGGTCATCA
AAACTGATGGAACTGTTCATCTTCGTCATACGCATACTGATCAGCTTCAACACGAATCTC
TCCACCATATGATTGGCAGACCAAATCCTCTTGGAGGATCTGATAGCAGTCAAATTGATC
TTGTCTCAGACAGGTCAAAATCTGTTATTGGTTTGTGGGCTAGTTCTGGCTTGAAAGTTG
ACACACTCGATACTATATTTGAAGCACAACTACCGGCTTCAGTAATCCGATTTCGATCTG
CAAATTGTCGTCCTGTATGGGATGCAAGCTGGAAAGTTCATAAAGTTGGGGATTATATCG
AGGACCCCACTCGTCTTCATGGTCTTGGTGCGATCTTCAATGATGAAATGAATTCAGAGA
CCTTGGGATTAGGAATTGATGGATCATTATACCATTTCACCACCCTTGATGTCCGAGCGT
GGCAGTTTCTCAAATATGTTGCCAATCTTGCAGGAAATTCTGGTCTTGTTGGAGGGCGAC
CATTGGATAAATCAGCCGACTTAGAACCAAATCAGACCCCTGCTAATATGCAAGTTGACG
GTGATATTCTGAAGAGGGTTTTAGAAAATCACAAACTCGAAGAAATGTTTGGGATTGGGC
ATCGTCAAACGGATGAGAACAGAAGACAGTTTAAGCGATTTTGTATGCTACTCGAGAGTA
TGCATGGGGGAAAATTGGAAACTAATCATGGCCCCAATGTCTATATAGAGCAGGCTTATG
ACGATTTAGGAGTGTTTTTGAGACCAGTCATTTAATAGTTTCATGAGGCTCAATAGTTTT
TAGATATTCTGGATCACAAGAACTAATCATTTCGATAGTCCATGTACTTTGAATCAAAAT
AAGAGACCATACCCCCTAGATATTT
>6a4685a1-5bb4-4763-ac6f-410df57a733f (mRNA) 3858 residues [Bfab07:446186-450043 + strand] [genomic] name=Bfab07g01210.1
CCGAAATAACATTCACACATTCGCGCTACAGTGAATCTCGAAAGTTATTCAACTACCATC
TTTTTTGGCACTCTTTCACTAGATTGTCAAATTAACATTCATTGAACAGCTGTCACTTAT
CTTTAAAAGGTTAGCTGATTTGTTTGGGAGCGTCTCGAATCAAATCCTCGATCTAAACGA
CCTCGATTTTTGATTTCGCCACGTAATTCTTACTATAATAACGCAAACTTTCCCACCTTT
TCGTTCTTGAAATCAACGACAACTTCAAACACCAAGATGGCACCCAAGAAGAAGAACAAC
AAGAAGCAGAACGATGACTGGGAGGCGGAGTTAGGAGAGACCGTTGAACCTGTCAAGGCA
ACGGAACCCGATGCCAACGCGGCAGAGGCTGATCCTGAGGAGGAATTTCCTGCAGGAGGT
CTCATGGCTATGATGCGCAAGAAGCAAAAGAAAGGCAAAAAGGGAAAGCAAATGGAAGAT
TTTGTTGAGGGAGAGGACCCACCAGCCGCCGATGAGCAACCTCAGGATGATTTCGCCGAC
AAAGCTCCCGTTGAAGCTTCAATAGACGATGAATTTGCCTTGCCAGAGAAGAAGGGAAAG
GGAAAGAATGCGCAAGCTAAGTCTGCAAAGGATGACGATGCAGGAGATGACGATATGGGT
GCGGATGGAAAAATGCTCACAAAAGCGCAAAAAGAAAAGTTAAAGAAGGAGAGAGAAAAG
CAGAGGAAAAAGGAACAAGTACGTGAAATTATTGATTCAGGGTTCTTTGAGAATATTGCT
AATTGTACACTTTGTAGGCGGCTTTGAAAAAGAAGACCACTCCAGGTGGAAAATCTGCTG
AACCTGAGAAGCCAGTTGAGGAAGAGAAACCCGTCGAGGTCGCACCAACTCCTGCTCCAG
GTGGAAAAGGCAAAAAGATTCCAGCTGCTCTTGCAAAGCTACAAAAACAACAAGAGGAAT
TGAGAAAGCGGGAGGCTGAAAGAGCTGCTGCCATTGCAGCCGAGAAGGCTCGAATCGAAG
AAGAGGAACGCCGAGAAGCTGAAGAAGAGAAGAAGCGTGAAGAGGCCAGAGCCTTGCGAA
AACAAAAGGAGAAGGAGAAGATTGAACAACAAAAGAGAGAGGGTACCTATCTCACCAAGG
CTCAACGAGAAGAGAAATTGCGAAATGAAATGAAACTAAAGCAAATGATCGATGCCGGTG
TAAAGGTTGGAGGTGGAGAAGGCGGAGAAAAGAAAAAGGTTGTTTATGGCAACAAAAAGA
AGGGTGGAAAGAAGAATCCCGCTGAAATCAAGGCGGACGAAGAGAAAGCCCTTGCCGAAG
CCGCCGAACGCGCAAAGAAGGAAGCCGAGAGAATTGCTGCAGAGGCTGCAGCTAAAGCAG
AAAAAGAAGCTGCTGAACAAGCCGCCAAGCAAAGCAAAGACGAGAGTGAGCTAGAAGACT
GGGAGGCAGCTGCTGACGAAGAAGATGAGGATGTCAAGGATAGCTGGGATGCGGATTCTG
ACGAAGAAGGGGAGAAGAAGGCTGTCTCTTCCTTGCCGGTTAGGAAGAAGGAGGAAGAAG
ATTCTGAATCTGAATCTGATTCAGAAGACGACGATTCTTCCGAAGACGAAGAAGCCACAG
CGAGAGAATTGGCTGAACTCAAAAGAAAGAACGAAGCCGCGGAAAGAAAACGAAAGGCAC
ACGAAGCAGCATTGGCGGCTAGATCAAAGGATAACTTGCGATCCCCTATTTGCTGTATTC
TTGGACACGTCGATACTGGAAAAACGAAGCTCTTGGACAAGATTCGACAAACAAACGTGC
AGGAAGGAGAAGCTGGAGGTATTACGCAACAAATTGGTGCGACTTACTTCCCAGTCGAGG
CTATCAGGAAGAAGATTGCAGTAGTGAACAGAGATGAGAGCTTCGATCTCAAGGTTCCTG
GTCTCTTGGTAATCGATACACCTGGTCACGAGTCTTTCTCTAATTTGCGTTCTCGTGGTT
CATCCCTTTGTAACATTGCCATTCTTGTCGTTGATATTATGCACGGTCTTGAGCCTCAGA
CTTTGGAATCGATGAAACTTCTTCGGGATAGAAAGACACCTTTCATTGTTGCTCTCAACA
AAATTGATCGTCTATATGGTTGGAAGAAGGTTGATAACAACGGATTCCAAGAGAGTTTGG
CACTTCAAAACAAGGGTGTACAAAACGAATTCGCAAAGCGTCTCGCAGATACAAAAGTTG
CTTTTGCCGAACAAGGATTTAACGCTGAAGTCTTCTACGAGAACAAATCTATGGCCAAGA
ATGTTTCCTTGGTTCCTACATCAGCTCACACTGGTGAGGGTATTCCAGATATGCTCAAGT
TGATTCTTCAACTCACCCAAGAGCGTATGGTCGGTGCTTTAATGTACCTTTCAGAAGTTC
AATGTACTGTCCTCGAAGTCAAGGCTATCGAAGGTTTCGGTATGACTATCGATGTCATTC
TATCCAACGGTATCCTTCGAGAAGGTGATCGTATTGTAGTATGTGGTGTAGATGGAGCTA
TTACCACAAATATTCGAGCACTCTTGACACCTGCCGAGATGAAAGAACTTCGTCTTAAAT
CCCAATATGTCCACAACAAGGAGGTCAAGGCTGCTCTCGGTGTCAAGATCTCTGCACCTG
GTCTCGAAGGCGCTATTGCAGGTTCAAGATTGATGGTTGTTGGCCCTGACGATGACGAGT
CAGATGTCGAGGCTGAAGTTGAGTCCGATCTCGGTGCACTCTTTAGCCGTGTTGAGAAAT
CTGGACGTGGTGTCACTGTTCAAGCATCTACTCTTGGATCTTTGGAAGCTCTTCTTGATT
TCTTGAAGGTATCTAAGATTCCTGTTGCCAACGTCGGCATTGGTCCAGTCTTCAGGAGAG
ATGTAATGAATTGTGGTACCATGCTTGAGAAGCAAAAGGAATACGCAGTCATGTTGTGTT
TCGATGTTAAGATTGACAAGGAGGCTCAACAATACGCGGACGATCAAGGCATCAAGATCT
TTACTGCAGACATTATCTATCATCTTTTCGATTCCTTCACCAAGCACATGCAGGTTATTG
CTGAGGCAAAGAAGGAAGCTTCCAAGCTTTTGGCTGTCTTCCCTTGCGTTCTTAAGCCCG
TAGCTGTCTTCAACAAAACCGGCCCTATTGTTATTGGTGTTGATGTTGTCGAAGGAAATC
TTAGATTGCACACCCCTATAGCTGCTGTCAAACAAAACTCGGTTACTGGTAGCAAAGAGA
TCGTGGGTATTGGAAGAGTCACATCCATTGAACGTGATCACAAGCAACTCGAAAAGTGCA
AGAGGGGAGAACCTTCCGTTGCTATCAAAATCGAAATGGGCAGTTCACAACCGACATATG
GTAGACACTTGGAGGAGGCTGATACATTGTACTCGTTGATTAGCAGAAAGAGTATCGATA
CCCTGAAGGAGTTCTACAGAGATGAAGTCAAGAAGGATGAGTGGGCACTGATTTTGAAGT
TGAAGCCACTTTTCGATATTTCTTGAGTAGATTAATGGTAGATGGTGGAAAGGATATTTG
TATGTATTATGCTTGAGCCATTTAAAATTTGCCCCACAATGTACATGATTTACTGAAAAG
TCAAATGATTATACCCTTTTGTTCGATTTGCAATAGTGATACATTTACAAGATACAATAT
ATGTTTCTCACGACCGAGGAGCAATGAGGGTTGCCAGAGAGAAATATCATGTGATATAAA
GGGGTTTGCATGTATTGTGAATGAGATTCTTGGGAGTTTGATATTTTGTGTTTTTGTATG
TAGGTAATGGGAAAGAGCAGGTGAATATGAGATAGAAAATTGGAAGGGAGAAAGAGTTTA
AGATATGTGTGTTAAGAG
>5c23aa35-da57-462f-98fb-00c64496d6d4 (mRNA) 3538 residues [Bfab07:450323-453860 + strand] [genomic] name=Bfab07g01220.1
GACCCTCATTAAAAAACGCTAGCAAGGTATAAATCCACTAATCCGGTTTGAGAACTGATA
GTCTTACCGCCTCATGGCAGAATTTAATTTTTGGTCAAGTTTTTAGACAGAGCTCTTCAA
ATTTTACAATTTCTGCAACCATCAGGCTTTAATTCGAAATGGGTAGCAAAAGGAAGCGTT
CAGCTCAAGATGCTGCAGTTGCAGCTCCTGCTGCCAAAAAGCAACAAAAAACATCCAAGC
CAGCGACCAAGAAGCCCGTGGAAACTCCTGTTCTCGATACATCTCCATTTGTCAACAACC
CAAGAGGGGACGATTTGAAGCGTGAAGTCAGTCTTTACGATATGCTTAGTAGTGAGGATG
ATTCGCAACGACTTGATGCCGCCAATGCTATTGTGTCTGGATTGTTAGGCGGAGATGGAG
TCGAAGAATCGACATTACAAAAGCACTTGGAGAGAAGATTGTTTCGGGGACTTGCAAGTG
GCAGGAAGGGTGCGCGATTGGGCTTCAGCATTGTACTTTCGGAGTTGTTGGCTCAACTTT
TTGGTTCGGCGAATCTAAGTGCGACAAAATATCCTGGATTAACCTTCGATAACGTCTTCG
AATTTTTAATCCTCAAAACAAAACCCGAGGGCGATCTGAGCGGACAGGAACAGAAAGATC
ATGCTCTTGGATTGTTATTTGGACTGCAATGCTTTGTCAGGTCCAAGATTCTTTTCTCAA
TCGATGGGAAATGGGAATTGGTTCTTGATAAGCTATTGGATTTATCCAGCAAAAAATCCT
GGACTCGGGAGGAATGCGGTTGGGTAATCATGGAAGCTTTGGAGCAGATGAACCAAGATC
AGGCAGAATCTACTTTGAAGAAATTGTGCGATGTTGGATTGGGACTCTCACCAGAAGGTG
TTGGTATCTGGCTCAGAGCAAGGGACAAGTTTCCGAAAATGAAGTTTCCAAGCAATCCTT
GGGGGCAGAGTGGCAACCCATTGGAGCATCTCAACTCCCTTGCAAAAGCACTCAAGGAGA
GTTCTTCTAGCGAGGAAACTTCGAGCAAAGGACAACAAGCCAAGCAAACTGGAACATGGA
ATGCGAAGTTACATTTTGTTTGGGACATTGTCTTAAGTCAATATGTTAAAGCAGCTAATA
ACAAGGCCAAGAACATTATGTCTGAATTCGACAAATTCTGGAAGGTCACTGTTGATGGTA
TGTTATTTATATTTTGTATCTTGACCTATTATTGACTATTCGCTAGAAAATCTGTTTTCT
GCATCTGCATCAAGAGAGCGTAAATTCTGGGGCTTCCTGGTCTTTCAAAGAATGATTCAA
AGCCATATTTCGTGTACAAAACTCATCACTAGTATCTTCAGTCACAACCTCGTCCGTTGC
CTCATCAATCATGTTCAGGAAAAAGATCGTTTCCTCAATCGGGCCGCCGACAAGTCGCTA
AAGGTTCTTACACACGCAGTGGAAGAGAATCCTGAAGCATTGGTTGTTGTCCTTCAAGGA
TTGATTGACGGCAACGGTGCATACAGTTTCGACCGGGTCACAAAGACAAAAACGATAGAA
AAACTGTTGAGTATGGTTGATGACACAAATGGCGAGGCCGTTCTCGATGTTCTCACTTCT
CCTGTCTTGCTTGTACCAAGCTCGGAAACCAATGACGCCGAAAAACGTCGACAAATGTTC
GGAGACTATGTTTTAACCGCAATTCGACATGTTGATCTCACAGAAGCGTCACAAAACTCA
AGTTGGATCAAAACCGCTGCGTTACCTCAACTTGCCTCGTTAGCATACTCGAATAACTCA
GAAGCCAAACCTCCCATTTCCGAAGGAACCCGTACATTAATCAGAAACCGGTTGACATCG
GCATTTACTCATCTATTGTCTAACATGGATGGCTATCATTACCCCTGCGATTTAGTTATT
TCATGCACTCCTGATGCAGTCGCCATGGATGGACTCATCACTGGTGCTAAAGATGCCGCA
TTCACTACATTACAGAAACTCATGAAGAAAGCAAAGAAAGGAGGGAAGGATAAGGCAACT
TTCCAAACTTTGTCATTGTTATATGCTTTAGTAATCTTCCAATTGTATAATGGAGACGTT
GAAGCTGTGTCCATCTTGGATGAGTTGAAGTTATGTTACGATAACTTAATCAAACACAAA
TCGATAGAGGACTCGGAAGTTGCACCTTTCGAGGTTCTTGTGGAGCTCTTATTGTCATTC
CTTTCTAGGCCATCCGCTCTTCTCCGAAAAGTCACTCAACATGTCTTCACTGCATTCATG
GGTGAGATGACCGAAGGTGGATTAAAACTGATGACAGATGTACTGGAAACTAGCGAAAAC
ATGAGAGGGCAACAGGAAATGTTTGATGAGAACCCAGATGATGAGGACGCGATGGATGTT
GATGAAGAAGATGACGAAATGGATTCGGATGTCGAAGTCGTTGACATGAATGGCGAGGAA
GGTCACTTAAATGCACATCTTGCAGAGGAAGAGGAAGAGAGCGATGAGGAAGATAATGAA
GAGGAATCGGAAGACGATGGAGATGAGGGAGATGATGAAGCTAACAAAGAGCTCAATGAC
GCATTAGCAAAGATCCTCGGCACATCATCATTAGATCAAAATGAAGAAGACGAAGACGGC
GATAGCGACTCCGATATGACTGATTCGGGGATGGATGCTCTAACTCCAAAACTAGAGGAG
GTTCTCGGAAGAATGCAAAAGAAGGGGCCAAGTAAGAAACAAGAGCAAAAGGACGCCAAG
GAAAATATGGTCAACTTCAAAAGCAGAGTTTTGGATCTTCTTGATATATATGCCAAGAAG
CAAGCGTCTGATCCCTTGGCTGCAGAAATTCTATTACCTTTGTTACGATTGATCCGTTCT
ACCAAAGCCAAACACTTGAGTGATAAGGCATTCTCAATAATTCAAGCTTTCGCAAAGTCC
AAGTCGAAGGCATCGTCTTCGGAAGCCGAAGTAGAGATTAATGTTAAGGCACAAATCGCA
TTGATCAAGGGTTTTCATGAAGAAGTACTCAAGGACCAGTCTAAGGTCTTCGCCAAAGCT
GCCAGCATAGCTAGTTTATCTTTGGCCTCTGGTATATATAGAGCGGACAAGAGTCAGTTT
GAGAAGATTGGAAAGGTTTACTTGCAAACGATGACAAAATGCGATGTCGAAGGTGTGAAG
ATTCAGGCTAGTTTTGTAAGCGATTGGGTTAATTGGTGGCAAAGTCATATTGCCCAAGCT
ACGGCAGGGAGTGCTGCGAAGGAGGAGTAGAGGCAGACTAGGGGAATTCGAGTGTACATG
TAAAGATACCAATGAACCAAAAGTTTCAGCAGTTATGACAGAAGATACAGAGGGCTGTTA
TTTGAGTTTCAACAGGGGATTCCTTTCCGGCGAGCACAAAGATTGCTACCTTTAGGGTCT
TTGATTTACTACTACTAATCTTTGAGGCTTAGAGGAATACAGTCAATCGGATGTTCATTT
CTATGAAAACATCAAAATGAATCTGTCTTTTCGTCGAAGCGTAAACGTTATCCTGATA
>b78005f6-b764-4d19-9db1-95b68b8d7d38 (mRNA) 3624 residues [Bfab07:453936-457559 + strand] [genomic] name=Bfab07g01230.1
TGATTATATCATAGAGGCCGGGGTCTTGGAGCAAATAGAAATCTTGCTGTGGTCCCTGAG
ATCCTTGTTCGTAGGAAGAATCCTAGACGCTATGGAGCTGTCCACCCACATCCGCCCAAC
CCCTCTTCATTCAAAACTGCGCCGTATCAAGATTTCTTCATCCGTCTTCATTCTCGTTAT
CTACTAAGTAACACCTCATCAATTCCCACAAAATCTGAAAATCTTGTCCATAAATCTACG
AGATTTTCAAAGGCATGGCTAGCGACAACCTGGAACTACCTGGTCTCTCCGAACCCTTTG
AAGAGAATGAAACCACAACCCTCTGTGAGCTTTGCAATAGCATAATTTCTCACCATACAG
GAATTGGAAGTGAAACTTCGGTTACGCCAGAGTTCAAATTGTCCGAGGAAGAAACACCTA
CCATGTTGTTGATTTTGAACGGTGCACAAGGAGGCTGTCGTCTATGCGCCGTGGCTTGGA
GAGTATTTAGGGATGGGGGGACTTATCAGAACTTCTGTTCAAACAACGATACTAATGCAT
TGTCCTTGAATGATATTGCAGAGCTTTTCGTTATAAGCTATTTGCATCTTGAACGTTCGA
AAGACATTTCTCTAGGCCTTTACAAGCTGTCCTACAAAATAGCCTATGAGAAGACAAATT
GGGGAGGTAGTGGCATCCTGGTGCTAGTTCTAGACACATTCGAGGGTAAAGCAGATTCCG
TCTTGTCAAGTTTTTGAGTTGCACCTTCAAGGGTAGACATGGAGAGTTTAAGCATATCTA
CTAAAATCTCGATACAGGTTCCCAAGACTTCCATAAAGCGTCAGAGTCTCACACAGATAC
CAATTATCTTTCTGAAGAGAGGTGGAGGAAATTCTGTTATTCATCAATCAGAATGTGTCA
AAGAACTCACGAAATATGCAATTCTGCACCAATATCTGACAAGGCTTCGCGTTGCTTACC
CACACGTCTCATTGACGTCAAAAAAGATCCTCCAAAGTTAATCTTGTCATCCAGCGCAGA
ACCTGCAAGTTCATACGCGGTTCTAAGTCACTGCTGGGGCAGAGCACCGATCCTTACTTT
GACGACGAAGAATTTGGAAGCTTTTCAACAAGGATTGCCCATTTCTCAGTTAAGTAAAAC
CTTTCGAGATACCGTCGATGTAGGAAAGAGACTATTACGAGACTTCAATGTAAGATATAT
TTGGATTGATAGTCTATGCATCATTCAGGATTCTAAATCAGATTGGGAGAATGAAGCACC
AAAAATGTCCCAGGTTTATGGGAACGCCTTTTGCTGCATCGCAGCCACTTCTGCCACCGA
TGGATCGAAGGGTCTTTTTTCCCCAAGGAACTCCATGGTGGAAGAAGTAATTCGTATAAA
TATTGATAGATCAAGATATCCATATCTGCCAAGCCCAGTAAGCATAACAATACTCAACAA
GGACAAGTGGCTTCAGTTCATTCGAGAGGCACCCTTAAACCAGCGTGGCTGGGTTGTGCA
AGAAAGGGCTCTTACCAAAAGAGCATTGCAGTTTTTTGATGGTGAAGTAATGTGGAAATG
TCAACAAAGAATGGCATCAGAGACATTTTCTGCCATAAAATCTGGCTTAAAGATACCCGA
TGATCGCCTTCTATTTCCTCAGTCTCTTACAGCAAACTTCAATTTCCGGGAATTCTGGAA
TCAACTCTTACGGATGTATAGCAAGACTATCCTTACGTATCCAGATGACATACTCATGCC
AATAGCTGGTGTGGCACGCCAATTTGGGGAATACCTACCGACCAACAACAAGGCATATCT
CGCCGGAATGTGGTCATTCGAACTTGAGAGGCAATTGGGATGGCGAACAACCTCACCTGG
CTCTAAATTCGATCTCGATCGTCGAGGATCCCCTAGCTCTAATGTGGCGCCATCTTGGAG
TGTGAGCGCAATTAGTTCCTTGATTTCATAATTCCTGATAGAAGTTTCTTTTCCTCTGCT
TTGTTCTTCGATTTCTCCTTGCAAATACCCCACAAACATAATCATTCTTCCAGGTATCTC
CATGGTAGGCATTTGCTGACGCTCCTGTGGTCCAGTGGGCTTCATCAACAGGCAGGTTAA
TCTCGACTGCATGGAAAAACAGCTCAAATGAAGATAGAGTTTCCTCTGTGCCCTGGTATG
ACTGGACTCCGGCAGAATACAAACGTCACATGATTACGGATCTAAGTCAGGTTCAACCTC
CTCAATTCACCATAATCGATGTCGGAACCACTCTTTCTACCAAAGACCCATTCGGATCCG
TTACTTCGGGCTTTCTTCAACTTCGTGGTCAGTTGAAGGTTGGGCGTCACTCTTTTACAT
TATCTAAAGATAATCTAGCAACCTGGAATAATAAAAATCTTCACTACATCCAGGTACTCG
GCAGATCCTACCTGTCCCCGGTGGTTTTTGATCGTTTGCAGTCTGATGACGAGCTAAGAG
AGATTAGAGAAGGGATGTTGTTCGTTTTCCCCTTGCATTTCAAAACTATCCGGAATTCCC
GTGCTCTTATTCTGAAGCCAAGCAGTGTTCGAAAAAGTTTAGTGAGGGTGGGCTGTCTAT
TGCAGATTCCAAACATTATTGACGTTGATTCGGAGAGTGATAAATTGATTGGGGAGGAAT
TTTATGAGGAATACCATGGGAATGGAGAATATACTATACGTATTATATGACAATTGCTCT
ATTAAAAGCTACCATTCTCCAAAAACCCTTAGATACGCAAGGTCTGGTTGACTAGCATCA
GCTGCCTAGCTAAAAGAACAGATGCTAAACTCTATGATGGTAGGTGGCTCTGAATGGTCA
TCTATATGGGCTAAAAGCACTGAGCACACCGAAGCTCAATCCGATACTACTCGCATACTT
GTCGGATTTTTCTACATTCATATAACAACCATGGACCATAGAGCATTGCACCTCAAACAA
TTGACGCCATCATCATATTGACACTCATGAAAAAGTTACAAAGGGCGAGTGAGACAATGC
CAGGATTGGACGTGGCTTAGCCCGTTTGCCATTACACTAGAACCAACACCAACACGTTCC
AAATAGCAAATGGTTGTTCTATTCCGATTGCTTGTGGCCATGTCCGGCATGAAAGATGGT
CTCCTAAAGAAATCCTGGAATCTCATGATTGCAATTGCGCCACCAAAGGAATCGTGTCTT
CGATCGCAAAGCCAGTCCAATTAGATCCTTCCACCTGTGCGTACTTTTTGCATGTATAGC
AAGCCATGGATAGCATTCGGTACGCTACATTCGGCTTTCTCGAGCCCAGAGTATTTAAGA
GCTGTAGAAAGACCCCTAAATCGGGGATCCAAGGTTACCATCATTTACCATTGAGGCCTC
CTAGCAAAGACCAACTGAAGAAGATTGATAGAGATCCCGACTTCGGGTACCTAGGAAATC
TCAATGGACTGCTCAAAGATTCGCAACAGTGGTTGCACGCAGTGGTCGCAATGGGTGGGT
TTCGTGCTAATATTCCGTTTACACTCACGATATCCATGTTGGACATAAAAATTGAAAAAC
AGTTGGGTGGTGTTTGCAATTTGTGTGTGTTTTGTATACAAAAATCAACCAAATTATAAA
GTTTTTTAGTTTCCAATGTTCTTA
>32968abf-0d12-441d-94d2-cc5abddf9e5d (mRNA) 1389 residues [Bfab07:458162-459550 + strand] [genomic] name=Bfab07g01240.1
ATATGTCTCCCTCTATAATCGTGGCTGAATGTGTCTGTCTCCAGGGAACAATGCATCTAA
CAAACTAGATCTTCAGCATTCAGAAACTAAAGAGCTGGTTTCATATCATTTCCCTTGCTC
TTCCTTATTACCACCTCATCCCATACTTCTCTTGCACAAACTGCACATGCCAAGAACATT
CCCTCATCCCAATCAATTCCAGAAGGCCGGCCCTTCATGTTCTCCCCTCCAATAATGACA
TCCAGAACGTTCCTTTTCCTTCAAGTTGTCTTCTCCCTGTACATTTCCTCTGTCTATTCA
TTTCCCTTTTCTCTCCTCAAAACAAACCTCATCGACCCCCGCGATCTCTCCGCCGTAGCC
AGCGAGCTCGGCACCCTAGGGAGCGATCTCCAGAACTCCAGCACTCTGAAAACCTTCCTC
GGCGATAGAGGAAATGTGATTACGCAGAACGATGTGCTGGATAGCAATGGAAGTTGTGCT
ACGATGACTGTGTTATTCGCGCGGGGAACGGGGGAAGTCGGTATGTCTATTTTACTTACC
TACTTATTTACAAATTCCTCTCGAGAAATCCAACGAAGAGGAACCAAGGAAGCGAAGCTC
GTATGACTAACCCCACGACTAGGTAACGTAGGAATCTTAACCGGTCCTCCATTTTTCACA
GCCCTAGCCGCATATATGAATGAAACCGGAAGCATGTCGATCCAAGGCGTAGATTATTCC
GCGAGCGTCTCCGGCTTTCTCGCTGGTGGTGATCCCGCCGGTGCAAAAACTATGTTCGTA
CTCTTCCTCCTCCTCTAAACCATACTCAACCATTGACACACACCCCAGGGCCGATCTAAT
AAATAATACTCTAACCAGCTGCCCCGATACGCATCTCACTGTGTCCGGCTACTCTCAAGG
AGCTCAACTTGTTCATCTCGCTATGAGTTCGCTGCCCACTACCACAACATCACGCGTTAG
ATCCGTCGTGATGTTCGGAGATCCAAAGAATGGTACTGCGTTAGCTGGTATCGATTCGAG
TAAAGTCATGACGATTTGTGATCCTAAAGATGATATTTGTAAAGGCGGGGATGCCATATT
ACCAGCCCATCTGGAATATAGTGCAAATGCCGGAACTGCTGCCAAATTTGCATTGAGTGG
GCTGGCGGATGTGGGTATCACGAGTGCGAGGAAAGTCAGTGGAGTTGATGGGATATCTTG
AATATTCAAGGTTGCGGAATGGGAAGATAAGAATATGAGAGATAAAATATTGTCTATAAA
TATGCTGTTAGAGTCTTTAGACCAACAAAGTTGAGTTTATTTGCATGTAATGAATCTATA
ACAAAATCTCTATCTATGTATCGTACATGAAATACATAACTGTACAAAAGGTATCTACGC
TTCACCCCA
>dc9a2d2e-9655-458c-8ead-6436e94558ed (mRNA) 3786 residues [Bfab07:459333-463118 - strand] [genomic] name=Bfab07g01250.1
ACGTTGATATGTGAAGTTTTTGCCTCTTGCCTTTATCTAAACTTGATATCTCACTGAAAC
CACCATAGATTGACAGATTGACGAACTCCCACCATCTTCTTGTCGTCTCAATTTCAGTCT
AATTTTGACTGTGCAAAGCATGTTCTACGGTGAGTACGGAGCTTGTGTGTGGTCTTTTTC
ACTTACAAAACCGGCTGATATTCAGTTAGATTTTGATTTTTACGTTAGAGCCGCACACCG
GTGACGATTAAACCTGTTTTCTACATATCCGTATACGATTTCTGTCTCTCTTGTTAGGGC
ATGCTCGAGCGCACGGCGGGATGTCTTGAAACAGGCAGTCTGCGGCGCCTTCTACCAGGA
CCAAAACACTTAGCCAAAAGTCGTCGCGCACTTCATTCGGGATTCTGGACCCACGGTGCA
ATTGAGCTTGAGCTCTCGCCATTATGGCAGCTCATGTTACAAGGGCCTGATGTTACTGAG
GGCTCGAACTCACGATTGCCCAATGATGGAACTGTTAGCGAAAGTCCTGGTATTTTTTTG
GACTTTCTCTATCCAACCAGTACCCTCAAATTTCTACGGCAATATCCAGGGTTGGGAGTT
GATAGACAAGATGGGAAGAGGACTAGACTGGGATTGAGAGGTTCTGGCTATCGGCTCTAC
ACATCTTCTGCTAAGAAACCTTCGTTGGCCTTGGTTCCGGTAGATGCAGAGACGAAAGAA
TCCGCCGAGATTAAGAAGCGTCCTATTATACACGAGGCGCCTGACGATGCAGCAACTATT
GCAACTGTTCTAGGAATAACAACATCATCCCGATACGAAGAGGTATGGCGAAAATATCGA
CGTCTGGAATTTGGGAGTTGGGCCGAGGAGAGAATTCGAATTCAAGTGTTGGAATATATG
GCGGCTTCAAATCGGATAGTAGATGCGGAGAGGGCCACTTCATTATTCGAGAGATCTGAT
GCTCGTCGAGAGAAACCAGAAATATACGAGATCGTGATTCGTACTTATTTGAGACTGCAG
AATTTCTCGAGAGCGAATGAACTTTACCACTACTCCCTCGAAAAGTTCAACACGACTGCT
GGAGGATCAGATATCATGTTACATCTCATGACAAATGGTTTGTGGTCGCAAGCCTTCACT
CTTTGGACAGAAGTGCAGCTGCACGGTAGTCTTACCGGACCACGCTATGATATGTTTAAA
AGTTTACACCACATAGAAGATCTTCCTAACAAAGCTCTACTTTTGGCAAAGTATGTCAAC
AAGTCGCTTCACCATCCCTCGGAAGTTGAAACTCTACCATCTGAAGCCCTCACGAAATTT
GCTACGGCAGTGATCACCTCAGCTCTACTAAGTGCCAAACACTTTTCATATGCCACGTTT
TGGCCCCTTTTAAGACATATTCAGGACTGGGAAACTGAGTCTGTTCGTCTTTATACACAG
GCAACCAACATGCTACTGTCTCTTGGTCAACTAAAAGCAGCCGTCGTTCTTTACAGACAG
GCCCGAGAAAGCCCAATGAAAAACCTCTTACTTCCAAGATCCATGTTACAATCCGTACTG
CAGATTTTCTTCAAAAATCATGATTTGATTGGAATTCAAGAAGTGTTTGCAGACATATTT
CGATTCAATCAGACTTTAGATCGAGCGTCGCACAGGAGATGTATGGATGAATTTGCACGC
TATGGAGATGCTGACACTGTTCATGCCTTGTTTGAACAGTTTGCAGAAAAGTATATGCGA
TTAGAAAGTGAATCTGCAACAACTCCTAATCCTTTGGCATCGGCCGATGACATGGCCCCT
CTCTTGCATGTTCACGCAAGGCGAGGAGAACCCAAAATAGTCCTCGACGTGTTTAAAAGC
ATCCGAAAAAAATATCGTCTCAAGCCGACCATAACATGTTGCAACATCCTTATCAGTGCT
TATGCACAGGTTGGTCAAGTCGATGATGCTTTGGAGACTTTTGAGTCTACTGTCACAAAA
CGAAAACTTCAACCTGATGACTATACTTTCGGAACACTGATGGGAATGTGTGCCTCACGT
GGTGATCTCGAAAACACCATTGAGCTCTATCGGGTGTCTGCTACTTATGGAGTTGAAAAG
AGCGCAGCCATGGTTAGCACTCTCGTGACTGCCTATCTGGCAGGTGATCGATTGGAAGAA
GCTGAAACCATTTGCGAAGAGGCCATGAATTTAAAGTTCTCGGATTCACGAACCCGCATG
TGGAATTCTTTGCTTGTTGCTTGGGCATTGCGTTATGACCTCATTAACGTCAATCGAATC
CTTCAAAGAATGTCTAAGCTTAACATAGAGCATGATGGTGATACTTATGCGGCTCTCATG
CAAGCGCTGGCTATGGTGAAACAACCCGAACGTGCCTGGCAGATTTTAGCAGAAGTTATG
CCAGAAGCTGGTATACCTGCGACTAGTCTTCATTATGCGATTGTTATGGGTGGCTATCTT
GCTGCTAAACGCTACAAGGAAGTTTTTGTAATCCAAGATCGAATGCTCGAGCAAAAAAGA
ATGAAAACTGCAAGCACAAAATTCTTGGAGTTGAGAGCGGCAATTCATGCAGCTAGGGTC
ACTTGGGGAGATCCACATGGCGCCATGGAGATTTTTGAACAGGTTGTCCAAACAATGAAT
CCTCGCGACATTAGTGACAAAGTCAGGAAAGGTATCCAGCACGAGCCACTTGACATTGCT
TTTCCTACCACGTTTTTCGGGTATATTGTATTTGTACTTTCCAAGAATATGGAGATAACA
TCCGCCAAGGATATGCATCAACGTTTCTTAAGATTGCTACCTACCGATAGAAGAGACACA
CAACCCGGGAATATTACCACTGCTTTGATGTCATTAAAACTTCAAGAGTTAGATTATGAC
GCCGTGGAGGATCTGTGGCAGCAGTTCGTGTCTGATACCCGCAAGCGAGCTCAATCTCTT
CGACTTTCAAAATTACTCTCTCGTACCAATGATTCTGAAAAGGCAGAAGTGGCTGAAAGT
GATGTCGACCATGCATCTGGAGAGGGCGCTCTGGAAGATACCAAAGCCAATCTGCAAGAG
AACAAGGAGCCAATTAAGGCAGCACATAGACTTGCTCTGACAAAAGCCTTGCACTTTTAC
ATGATGGCTCTTGTAAGGCAAGGAAAAATCAACGTCATGATACGAACTGTCAATGAGATT
ACGGATATGGGATTTCAATTAAGCAATCAGAATTGGAACGAATATATTCAACATCTTACC
AAGTTTCGACATTTCAAACTAGCATTTAAGATATGCGAAACGGTCCTTATGGATCATTGG
AAAGGATGGGCGAAGTTAAGATTTTTAACAAGCGAGAAAAACAGATTACCGTTAGAAATT
CGGAGGAAGGGAAAGCTATTGACGTCTCTACGTCCAGAATACCGCACATTCTTGTACCTA
ACCAAAGGCTTTCTCAATATACAGGCTATGGCTGCGGAATCGAGGGCTAATCGACTTTTG
CTCAATGATTTGGAGCATGATTGTTCAAGGACACTGAATGCAATCAAAACCATGGTTAGA
ACAGGAGATTCTCTAGAACGAGAAATTTTGGGGTGAAGCGTAGATACCTTTTGTACAGTT
ATGTATTTCATGTACGATACATAGATAGAGATTTTGTTATAGATTCATTACATGCAAATA
AACTCAACTTTGTTGGTCTAAAGACTCTAACAGCATATTTATAGACAATATTTTATCTCT
CATATTCTTATCTTCCCATTCCGCAACCTTGAATATTCAAGATATCCCATCAACTCCACT
GACTTT
>61d613f6-06b9-4951-a784-b05e604dac19 (mRNA) 2612 residues [Bfab07:463360-465971 + strand] [genomic] name=Bfab07g01260.1
TTTCTCCCACCATTCTTCCATCTACCTATCTCAAGATGATATACATATGTATATATTCGG
TTTATTCCGATCTTCCCAAAAACAGACATAGACATCACCGGGGCAGATTGGAAAGTGTGT
ACGTACGCTCAATTCACAACTAATTGGAGTGAAAATCGATTGAAAATAAAACAAATCCAT
CCGAAAACATCAAAATGATTGTCAGCTTTTGATTGTCCTAAATCTCATCCAAAAAAATAC
AATTCATGTCAAAGTTTGGGGGGGAAACAATCATCAATATCAAGATGTAGTCAAACTCGC
CCGCTTCTTTTCTCTCATATCCTTCGCAAAGAGGTGGTCCAACCCAACGTTTCGCTTACC
GCCTTCCTTGCACTCAAATCATTCTGCCAGGATTAAATTTCCAGCTACAACTGATCTATA
CCACTTCTACAACCCCACAATCCCGCAATCCACCCAACCATTCTTCCAAACCCCTTCAAA
CAATGGAAATAACCAAATTCGTCCTCGAAGGACGAGACGAGGCGAAGCTATATGGCGATT
CTTCTGCTTATCGAACTCGACTTTCAAATCGCATTCACACCTTGAGAAAGAAGCTTGGAA
TTACGACGAAACCCCGCGCAAAGTACTCGAACAAGCCTGTAACTGCGGAGGACATTAGTC
AAAGCCATGATTATATCCATCTCCTATTGCTTACCTCCGAAAGAGCGTGGGCGCATGCTA
TGTCAATGAAAGAGATACACACTGTTGATACAAAAGGGATAACTGGTTCAACTCGATCGC
ACATCGTTTCTCGATTACACAAAGCCACGATATATGCCAATGATCTTTTCCGATTACTAT
CCGATAAATCAACTACCAATGCGAACGATGTCGATGTATTGGAAGCTAGAGCATACGCTG
CTGCTCTCGCTGGAGCAATGGAATTCGAAAAGCAAAGTTGGGAGGCTTGTGTGAAGAGAT
ACGCGGAGGCTAGGATTATATACACTGCACTTTCTAAGGTCACCAAAGCGGACATCTTCA
AGGATCTCTTGGCCGACCCTGTTGATCCCAGTATACGATACGGGGCTTATAAGATGGGAC
TGCCTCGAACACTAGCTATATCTGCCATTGCACGCAAGAATTTCCCTTCGGATCAAGAGT
TGACAGAGCAGGTGGAAAAGTTAGACCCCGACTGTCTGAAAGACGAAGCGACAATATCAA
AAGCTGAAAGTCTGGAATCGGGCGAGACAATCAAAACTATTGTCTGGCGATCACGGACAG
TGGATTTAGAAGATGCGGCAATAGCTACTGCCCTTGGATCAGTAAAGGCAGCGTCATCAA
AACTGTCTAATACTCTTTCCTCGTCTACTCCTAAGGATAGGGGCTCCGCTTATGACGATA
TTCTAATCGCTAGTCAAGAAGTAGTAGACGCTACAAAGCATGCTATTGACGAGCTAGTTT
CGGAGGGTGTTGGACAAAGTGATAAGCGAATGCAAAGCCTATTAGTGACTAGGACCGCTG
TTAGCTATGATATGATTGGTTGGCGTATAGGCAGAAACAGAGTCATGGTAGGGGAGCAAG
ACGGGATTATCGATTACGTTCAATCATTTCCCGCAGGGAAGGTCAAGAAATCAACCAAGG
ATGAGCCTATAGGGCGTAAACTTGCCAAATTACGCGAGAAGGTTGTTCTCTATGACGCAA
TCCTGCAAAGTGTTGAGTCAATTAAAGAGCTCCCAGGTGTTGCAGCAGATTCTAGTCTAC
AGGAAGAGCTAGATGCAAAATATAGCTATTTCCAAGCTCTTAAGTAAGTTGATCTAATAG
CTTTAATTTGCATACAAAGCTCAACTGACCATTAAAATAGATGTTTGATAATAGCCCGCT
CTCACGCAATTCTTTCGAATCCCAAAAATTCACTAGCTCTCTTGAACCGCGCAACAGAAA
AATGCACAGCTGCCCATTCAAAACTATCTTCGTCAATGGACACCACGACTACAGATACTC
CGCCTAACCTAACTGTCACTCCCTCTGAAACTGAAAACCTCCTCGCTTATCTTCAATGCG
AACTTCAACGCTACCGCGCCTTGGTCGAAATATCTAACCTCACCTCCACTATCCCGAAAC
CTGGCGATGAAAATGTACAACAAATTCCCCTCGTTGAGCGTCTCCATGAGTACCCATCCG
ATGGAGTTGTTGACCTGAAGAATCTCGTAAACTATCCTCCAAAATTGGAGGTTGTACCCG
TCAAACCACTATTCTTTGATTCGGCGTGGAACTATATTGATTATCCAGGAAGAACAACGG
AGAAAGCTGCAGAAAAGGCTGCAGTGGAGGTGCAAGCGAAGGAGCCAGAGCCAGAGGAGC
CACAGGAGCAGCAACAACAGCAGCAGAAGAAAGGATGGTTTGGTTTCGGCAGATAGATAC
AGGCATTGGATTAATAATTGTTGCTAAGCGAGCGGGAGCTATCGTACATATCCATCAAAT
TTCAATCATGCTAAAGCGAGGATTCGCTAGTAAGGTTGACAAAATAGAGCTTTCACGATA
AGTAGCCCAAGCTAAATAGTTACAAGAGCTAGGTTTAGAAATATAAAACTTTCAAATCCT
GGCATGTTCTTACTCAGACTCACTGATACATC
>71f973ff-53a1-4d7c-874f-c2ce14180442 (mRNA) 3127 residues [Bfab07:465976-469102 - strand] [genomic] name=Bfab07g01270.1
CTCCGTTGCTCCTTGTACCGATCTGGGTTTTGCCTCTAGTCTTCCCTTGCAACATCACTC
TTCGTTATTGTTGCCCGCGGAGAAATTCATATATTCACTGACTTGAAACCTTCGTCGAAC
ATCGTTTTCCTCTTTATCTGAGCGCAAGAGGGTCTCGCTGGATCAATATCATCGTATCCT
ACAAACCCTTCAGTTGTAAGATTTTGTCAGCTTTTATATCTTATATTAATGGATTTGATA
TCTTATACGGAAAAGAGAATCTCAATGGCTAGTGCTCAATCCATGAATGAACACTCTTCC
GAGGCTGATGCGGAGATATCGAAAATGATTCCTCAATTGCCACAGACTCCGCCAGATTCC
AATGAGAACAGCTCGGATGAGCTGGGTTCTTTATCAAGTCATTCTAGTTCAACCTCATTG
TCATTGCAGCGATACACTCTTCCACCTCCGACAAATCCACCAACAGAAATTCTCAAGGAA
GATTTGAAAACACCGGACAATCAAGTGCCCCGGGACCCTCGACTTATTCGGCTGACTGGA
ATTCATCCCTTCAATGTCGAACCTCCTTTAAGCGCTTTATATGACGAAGGATTTCTCACA
TCGCCTGAATTGTTCTATGTCCGGAATCACGGAGCTGTACCTCATGTTGAGGACTCATCA
ATACCCGACTGGGAATTTTCTGTCGAAGGATTGGTCAAAAAACCCTTTACTCTTACACTC
AAAGATCTCCTGAGAGAATACGAACAAATCACCGTACCCATCACACTTGTCTGCGCCGGA
AATCGTCGTAAAGAACAGAACCAAGTCCGGAAATCTAAAGGTTTCTCATGGGGTGCTGCA
GGCGTGTCAACGGCACTATGGACAGGCGTACCAATGTACGAACTGATTAGAAAAGCGATG
CCAATGAGAGGTGCAAAGTATGTTTGTATGGAGGGTGCCGATAAGCTTCCTAACGGCTAC
TATGGAACCTCCTTAAAGCTTAACTGGGTTATGGACCCAAATAGAGGAATCATGGTAGCC
CACAAGATGAACGGGGAAATGCTTCGACCCGATCATGGTAAACCTTTACGAGCTGTTGTT
CCCGGGCAAATCGGTGGCCGCAGCGTGAAATGGCTGAAAAAGATTATTGTTACCGCAGCT
CCTAGCGATAACTGGTACCATATCTACGATAACCGAGTCCTTCCAACTATGATTAGCCCA
GAGCAGAGTGCCAATGAACCCAAGTGGTGGACGGATGAGAGATATGCCATCTATGATCTA
AGTACAAACAGCGCCACCGCATACCCAGAACATGAAGAGCGACTATCTTTGGTGAGCGGA
CAACAAACATATCGTGCGAAGGGCTATGCGTATGGTGGTGGTGGGCGACGCGTTACGAGA
GTCGAGGTAACACTTGACAAAGGAAAATCATGGGCGTTAGCTGATATACGATACCACGAA
GACGATTATCGAGACCGTGCCTACGAGAATGAAACGTTATTCGGAGGTAAATTAGATATG
GAATGGAGAGAAACGTGTTTCACATGGTGTTTTTGGGAGGTTGATTTGGATGTCCAAGAT
CTCGCAATGTCGGGAGATATCATGGTAAGAGCCATGGACGAGAGTATGAATGTTCAACCG
AGGGATATGTACTGGAGTGTGCTTGGCATGATGAATAACCCATGGTATCGAGTGACCATT
ACCAAAGAAGGTGATTATCTACATTTTGAACATCCCACACAACCAGCGCTTATGCCAGGA
GGATGGATGGAAAGAGTAAAAGCCGCCGGCGGGAATCTCGCCAATGGATTCTGGGGCGAG
AAAATGGGCACTGGAGATGAATCTGTCGCGTTGGTCGAAGTCAAGCAAGAGATAAAAATG
ACAAAGGACGATGTGAAGCGTGAAATCTCCATCGAGGAATTACGTCAACATGACAATGAA
AAGGAACCTTGGTTTGTCCTCAACGGCGAAGTCTACGATGGAGCCCCATTTCTGGAAGGT
CACCCGGGAGGCGCAACAAGTATTACCGGAGCCGCAGGCCAAGACTCCACCGACGAATTC
ATGGCCATCCATTCCGAAACGGCAAAAGCAATGATGCCCGCCTACCACATCGGTACTCTT
TCCCCCTCCGCCCTCACTTCCCTCCTCAACCCCGAACCCCTATCTTCCTCATCCCAATCT
CTCCGTCCCATCTTCCTCCAACCCAAAAGCTGGCAAAAAGCCGTCCTCACCGCTAAAAAA
GTTATCTCGAGCGATACGCGCATCTTTTCTTTTACTCTCGATCATGCGGAGCAAGTCATC
GGGTTACCGGTGGGTCAACATCTCATGATGCGCTTACGGGATCCCGTGACCAGGGAAGCC
ATCATACGATCCTACACGCCTCTTTCGCTCGGGACCGACAAAGGGGTCTTAGATATCCTG
ATCAAGATCTATCTGAAAAATGAAAAGGGGCCCGGAGGAAAAATGACAATGGCGCTGGAA
AGTATCCCCGTTGGTCATTCCATTGATTTCAAAGGACCGATTGGCAAATTCGAGTACGTG
GCAAAGGGAGAGTGTGTAATTGGGGGCAAAAAGAGGAGGGTAAAGCGATTCGTGATGATT
TGTGGAGGAAGCGGCGTTACGCCTATCTTCTCGGTATTGAGAGCGGTGCTTAATGAGGAG
GAGGTGGGAGATGCACCGAAATGCATCGTGCTAGATGGGAACAGGAGAGAGGAGGATATT
TTGTGCAGAGAAGAGTTGGATGATCTGGTAAAGGGGAACGAGCAGAGATGTAGATTAGTG
CATGCTTTGAGTCAGCCGACGGAGGAATGGAAAGGATTACGAGGGAGATTGGGAAAAGAG
GTTTTGGAGAAAGAGGTAGGGAGGTTTGAGATGGATATGGATGGTGAGGGGAATGGGTAT
AGGGATGGTGAGCAATTGGTTTTGATCTGTGGACCGGAAGCGTTGGAGAAGAGTGTGCAT
GGGATATTGTCGGATTTGGGATGGAAGGATCAAGATATACTTTTCTTTTGAGATTTTAAG
TAACTCAGAGGTGGTTTAGATATGGTTTTAGTTTTTGCCATTGAACTGCGTCTAAAATAA
TGGGAGGGAGGGTGTTTGAATATAGTATCTATAAAGTATATCAATAAAGTATTATTATAA
AGTAGGT
>4289c04f-fac5-4870-a81c-5fde25b7163a (mRNA) 5213 residues [Bfab07:471425-476637 + strand] [genomic] name=Bfab07g01280.1
TTTCCCACAACCCATCTTTCGACTCAACTTGTAATTCCTCTCAACCTACATAAAAGGGTG
CTGGACAATCAATTCCTGGGAAACAATCCTCCCCCCAAACCAAACCTTCGTATCCAGATG
CATCTGTCTGCTTCTGTGAAGTCATACTACCTTTGGTCTTTCTTACAAAATCCCTGATGT
GGGGCGCAAGGAACACATATCGCACCCCCCACCTCAAAACATAAAGATCCGGCCTGAATA
GGCTCATCATGGATCGCAGGAGAAAGCGTGAGTGCTTGCATATTACCCTACGATATGCAG
ACATGTAGGCTGACGTGAATATTGATTTGAAGGCGAACTGCGCGACTTAAACACTCGCGC
TTGGAATGGCGAGAAAGGTTGGTTGGATGTGCGAACAACTCATAAACTATTCTGTCTAAC
CTTTCAACACAGACATTTATGCCGTGAACAAGTCACTGGATTCATCGCTCAAGAAGAACA
CGGCCTTTATCAAGCGCCTTCGAACCGCAATTTCAGCTGCGACCCTCAGCACCTTCCTAC
AAGAAATTCGAACTCTTAGCCTACACAAATATCTCTCGGAAATTATATCGGCTTGTTATG
AAGGGCTTTGCAGACTCAAGTCGCCGGGAGAGGTTGAGGCTGGTGTAGAAATTGTCAGCG
CATTACATCAGCGTTTTGGGCCGGCAGAATTTACGGAATTTCTGGGATGGTTGGTAGGAA
AGGGATTAGCTACACCGGAAAAGTCATTATTGAAGAGTCTCGCAGCCGAAGCCCGGGAGA
AGGAAGAAAAGGAGCGGATTGTACGACAGAGAGTACTTTTGAGAGTTGTCACCGAGTTGT
GGTTGGTGGGAGTTTTGAGAACGTTGGACGATGTTGCTCGACCAGATGACGCATCTCACG
GCAAGGAATCTCTTTCAGGATCGTCGAACAAGGCACCAGATACTAAAGCGAAACCAAACG
GAGTTGGAAAAGGAGGAGGTGCGGAACCATTTCCTCTCGAAGTTCTCAAGGACCTTCTGG
GCCATGATAGGGATCATGCGAACTTGCCCCTACTGGTGATCTTTGTAAAGGCGTTTGGTT
GGGACATACTCGGTGTCAGAGAAGCTGGATACGAGGGCAGAAAGACTGTAGAGGAAGACG
GCACCACGAAGACAACGCTTGATGCCACCGAGGGCGAAGGTGAGAATGAGGATGGCGACG
AGAACGATTCGGTGGAAGAGACGTCACCCTCAGTGGACTCAACCGAAGATGCCCCTCTAG
CTTCACTCGAACTCCAGGAGCGCTTCCGCAACATCCTTAACCGCTATTTTGAAGATGTCA
AGGCACATATCATTCGTGATCAGAAGGCTATTGCTAAACAGGCCCGCAAAGACTCAGAAG
CATACGTCAAATCTGGCCAATTGTTTGAAGATCGCCAGGCAAATTATGAAAAGGCTCTCA
AAGCGCAAGAACGACTTGTATCGAACGCTCAAGTCCTCGCGGAATCCATTGGCGCGGAAA
TGCCAGATCTTAAAGACTCCGATGACTCTTCGGCCTTGGGCAATGGAGGCATTGGGCTTG
TGAAGGCTGGCGATTATCTGAGAGGAGAAGGCGAGGGCGCAGGTATCTGGGAGGACGAAG
ATGAGCGGAGATTCTATGAAAATCTAGTAGATCTTAAAGGAAAGGTCCCGGGTATGCTCC
TCGAAGATGGTAAAAAGAAGAAAACAGATACGGATGAGCAAGTGGGCAAAAAGGTCGATA
CTTCCGAGATCATTCCCGCAGAGACCACTGCGCCCACCGCGAAGACCACAGATGACGACC
AATCCACGGCCATTGCCAACAAAACCATTGGCGCCCAGGTCGATGCATTACTTGCTAGAC
TCCCTGATCTTACAAACAAAGACCTAATTGACGAGGCTGCAATTGACTTCTGTTTCTTGA
ACTCCAAAGCTTCTCGCAACCGTTTGATCAAAGCTGTGCAAGAGGTTCCTAAGGGTCGTA
GTGATCTTCTGCCATCATACTCAAGACTAGTAGCAACACTGGGGAAGTACATGCCTGATA
TCATAAAAGGCTTGGTTGATCACCTTGATCAAGAATTCCGCAGCCTTCAACGTCGCAAGG
AAAAAGAATTCTTAGGTCAAGCCCGACTAGGAAACATTCGCTACTTGGCTGAGCTGACCA
AGTTTGGCGTGGTTCCTGAGCATGTTATATTCCATTGCTTGAAAGTCAGTCTTGACGACT
TCTCACGGATGAATATTGAGATCATATGCAACTTGCTAGAAAATTGTGGTCGATACTTAC
TTCGCAATCCAGACATGTCCCCTCGAATGACATCCTTCTTGGAAACACTAAAGCGCAAGA
AGTCGGTCCAACATATTGGCCAACAGGAGCGCATGCTGATCGAAAATGCCGTTTACTATG
TAGACCCACCTTTGCGACCAACGATCCAGCAAAAGGAGAGAACGCCAACTGATTTATTCA
TTCGCAAGCTTGTCTATTCTGATATGACTACACGAAACTATGCTAGGATTATCAGGTCGA
TTCGAAGACTTCACTGGGAAGAATCAGAGGTATGGGCTATCTTTAACCTTTGGACGACAT
TTACTAACAATTTATCAAAGGTTGTCACTATTCTCGAAAAAGTCCTTTCCAAACCCGGAA
AGGTAAAGTATGGTAACATTTATCTTTTGGCAATTGTTACAAGTGCTCTCTTCCGTTATC
ACCAAGGGTTTGTAATCACAGTCATTGACAATGTATTGGAATACATTATCGTTGGTTTGG
AGCAAAATGATTTTAAGTTCAACCAACGTCGGATTGCAGAAGCCAAGTACCTTGGGGAGC
TGTACAACTTTCGAATGGTAGATCATCCTGTAATATTCGACACAATGTACCGTATCTTGA
CATTTGGTCATGGTGAGTTAAAATTGCAGCATATTACAATTTTGCAGCATGCTAACACGA
TTAGGTGGACCGCCTGTCCCTGGTCGCACCAATCCTTTCGATATGCCTGATGACTTTTTC
AGAATTCGTCTTGTAGCAATTTTATTAGAAAGCTGCGGAGTTTTCTTTAGTCGTGGCGCG
GCGGGAAAGAAACTTGATTACTTCTTGTCATTTTTCCAGGTATATCCTATTCCAATCCCA
TTATTGCTGGCATGTTAACCTATGTAGTACTACATTTATACGAAAGATCCTCTACCCATG
GACATTGAATTTATCGTCAGTGATGTTTATGCAGCCACCAGACCTCAATGGAAGCTTGCC
TCAAATATCGAAGAAGCTAGTCGTGCGTTCCAATTGGCCATGGCCCAGGATCAAAAGACT
GCTGGCATTGAGAAGGTTGTTGAACCAGAAGAGCCTGATAGTGAGGCATCATCAGACGAA
GGAGATGCAGGCATTCCGGAAGGAGATATCGACGATGCTTCCCTCGATTCCGAAGAAGAA
ACGGAAATTGATGCTAATGCCGACAACTTAACATCACCAACAGGGAACGAATCAGAAGAA
GAAAACTTCAAAGTCACTCGCCAGGAAGAAGAAATTGATCCTGAGGATGAAGCCGATTTC
GAACGTGAGTATGCTAAAATGATGGCTGAGAGTCTAGATTCCAGAAAATTTGAACGAAAA
GCGACATTCGATGTTCCACTTCCCATGAGACGCAAAGACCGTGAAGTCGCAACCTCGAGC
GAATTGCCTAGTGAGACTACCTCAGGAAATGGTCCATCCAGTGGTACAATGGCATTCTCA
CTTTTAACAAAGCGTGGCAATCGACAACAGGTCAGAATTCACCTACACGAGATATTGCAA
TTGTCACTAACTGCTCACTTATTAGACTCGAACGGTAGCCCTCCCTTCAGACTCAAATTT
CGCAATCGCTATGAAATCACAACAAGCTGCCGAGCGCGAGGAGCAACAACGCATCAAGAA
TCTAGTTCTGAATTATGATCTCAACGATGGCGAAGAACAAGATGGTGACTCTGCACTGCA
ACCCTTACTCCCTAATCCCAATATTCACACTTTCACTTCAGGTTTCGATAAAAATGCCAC
TACAACGTTCTCCAGATCTGATAAGTCTGGTAGTAACCGTAGTGGACAGAGGTCAAGAAA
ACTACAGCTTAGTGATGTTGATTGGTATGGTCCCCCAAAAGAGTCTTCTCAGATTCAAAC
TCCAGGAAATGCCCTAAAAGAAGAGAATCGTGAATCCCGGAATATTCCCGAGTTGGACGT
TGGGGTAACCTCAGTATCTACGCGAAAAGTTTCCAAGTCATACCCAAACCTCACTGTTGA
AAGTAGCCCAAATGATAAAGGTTCCCCCAGAAAGGAAGAGAATCTGCCAATGAGAGATAC
GCCTGGAAGTATTTCCAAGAAGTTCCACCTGAGATAATAATCTGGCTTTCATTTCGGCAA
TTTGGTATTCTGCTTTGAACAGTGGACAACTCAAAATTTTGCTTTTATTTCTTCTTGCCA
ACATTACTAAAACAACAAGGATAGACGAGTGCTGACATTTTCCCCTTTTTCCGGGGACCT
CTTAATAGGACATGATAAGTTTTGCTGTTATCATATTCGCATTTCAACCCCGAACTTTGA
CTTGGGGATTTAGTTGCGGACACATAAGTATACACTTCTTCTCTGCCCGCTCGATATGAG
GCTCACTGCAGTCTGTGAATGCTTCTTCTTCGGGTGTTCATTCATCAGGGGTATGATTCA
ATGTGGCTCCTTGTCGACCGAGACACAATGCATCAGCAAACAAGCAATTCCGATGATGGT
CGACGAGTTGATGTTTGCCAAGGTGCTAACTAACCCCAAAGAAGCGGCAAATCTAGCGGA
GATGGAGGATCCTAGAGATGAACTTCACAATTAAATCGTCGGGATGGATGGGCGCTGAGT
TGGTTGATGGCGGGCAAATAAGAAGTGACGTAGATGATGGTGAAGGATCGTGATGAAGAT
AAGAGGATTTGGTTGCCAATCTCATTTTCATTCGTCCACTCTTTTGACTTGCTTACTCTG
TTGCTGTTCTCGACAGACTGGCCCTCCCTACATTCTTTACATACGCATGCATATTCATGC
CATTCTCACTCTCTCGGGCCTTACTCCTTCCTCTTCCTCTTCGACTGATGGGTGGAGCAT
CACGGATTGAGTGCGCAGAGATAAGCAATGAGAATACATGGATGGATTTAGCATACCCGT
ACATCAGTCACAATCAATTGAGAAGCATAGCAGATCGCATCACATCGCTGTTT
>75ec9326-271b-49a2-96ef-dbb5aa2dc029 (mRNA) 2941 residues [Bfab07:476890-479830 - strand] [genomic] name=Bfab07g01290.1
AGGATTTGACAATCAACGAGAACACCTTTCCCATATCCCCCCCCCAAAAGTTTTCATCTT
TTTCGTTTTAGACTTTCCCCAAAGGAATTCCAATTTTTGAGATACCTTTTCTTCCCTTAT
CGTCAGAAGAATCGTCTTCTTCTTACCTCTCCATACCCCCATTTACTTTGAAGCGCAAAG
ACAACAAACTCAAACTCAATATGTCTGGTACGTGATGGCTACTTTCCCTCCTTCTTCTCC
GGGATCAGACCTTTAATGCTAACTGTCGTGCTATTCTAGTCGTCGGTGTAGATTTCGGTA
CTCTTAACACAGTCATCGCGGTCGCAAGAAACCGTGGTGTCGATGTCGTATGTCTCTTCA
CTCTCTTGGATGGGTTTTCCCTTTGGTGGGGGCTGTTATGCTAACTTTTTTTTTGCGCAG
ATCACAAACGAAGTTTCGAATCGTGCAACTCCGTAAGTTATCTTGATTCACTTCACTTGC
ATAGCATTTCTAACATATCTGCCATCTAGCTCCCTCGTAGGTTTCGGACCCAAAGCCAGA
TACCTCGGTGAACCAGCGAAGACACAAGAAATCTCCAACCTCAAGAACACTGTTGGATCC
CTCAAGAGATTGGCAGGCAGATCGTTAAAGGACCCAGATGTCGCTTTAGAACAAGATTAT
GTCTCGGCTCCTCTCGTCGACCTTAACGGTCAAGTTGGTGCGGAAGTCACATATTTGGGC
AAGAAGGAAAGATACACTGCTACTCAACTCGTGGCTATGTACCTGAGCAAGATCAAACAA
ACCGCTTCTGTTGAGTTGAAGCTTCCAGTATCAGATATGGTCATGAGCGTACCAGCATGG
TTCACCGATGTTCAACGAAGAAGTTTGATGGATGCTGCTGAGATTGCCGGTGTCAAGCTC
CTCCGTTTAATGAACGATACCACAGCCGCTGCATTGGGTTGGGGTATTACCAAATTGGAT
CTCCCAACCCCAGAAGAGAAACCCCGTCGTGTGGCCTTCATCGATATTGGTCACTCCAAC
TATACCGCCTCGATTGTGGAATTCAGAAAGGGTGAACTCACCGTCAAGTCAACTGCTTAC
GATAGACATTTCGGTGGACGAGACTTCGACAAGGCTTTGGTTGAGCATTTCGCCGCAGAG
TTCAAGGAGAAGTACAAGATCGATATCAAGTCCAACCCTAAGGCTATGGTCCGTGTTGCT
GCTGGTGCCGAGAAGTTGAAGAAGATCTTGTCCGCCAACGCCATGGCTCCTCTCAACATT
GAATCTTTGATGAACGACGTTGATGTTAGCGCCATGTTGAAGCGTGAGGAGCTCGAGGCA
CTTGTTGAGCCACTTCTCAGTCGGGCCCACGTTCCTCTGGAGCAAGCTTTGGCCGATGCG
GGGTTGAAGGCTGAGGATATCGACATTGTTGAACTTGTCGGTGGTTGCACACGTGTCCCA
GCTCTCAAGGAGCGCATCCAACAATTCTTCGGAAAGAACCTTTCCTTCACCCTCAACCAA
GATGAGGCTATCGCGAGAGGATGTGCTTTCAGCTGCGCCATTCTCTCCCCAGTTTTCCGT
GTCCGCGACTTCGCCATTCACGATATCGTCAACTACCCAATCGAATTCACATGGGAGAAA
TCCCCAGATATCCCAGATGAGGATACTAGCCTCACCGTTTTCAACAGAGGTGGAATTATG
CCATCAACCAAGATCCTTACTTTCTACAGAAAGGAGCCATTTAACTTGGAGGCCAAATAT
GCCAAGCCAGAATTACTACCCGGCACAATGAACCCATGGATCGGAAGATTCACCGTGAAG
AACGTTAAGGCTGACTCCAAGGATGATTTCATGATCTGTAAATTGAAGGCCCGTCTCAAT
TTACATGGTATCTTGAACGTTGAACAAGGTTACTATGTTGAGGATATGGAGGTTGAGGAG
CCAATCCCAGAGAAGGATGGTGAGAAGAAGGATGATGTGAGTAACCAAATTTCTAATAAT
ATTCAACCCCCTTTCGAAGACGAGCCTATCGCAAAACGTCCCCGTTTACAGGGACATAAT
AAACTAACGCACACCACCAAGGCTATGGACACCGATGATAAGCCAAAGACCAGAAAGGTC
AAGAAGCAAGTCCGAAAGGGCGATCTTCCAATTGTTTCTGGTACCGCTTCCCTCGACACC
GCCGCCATTGCCACTGCTTCCGAACAAGAAAACACCATGAACATGGAAGACAAATTGGTC
GCCGATACCGAGGAGAAGAAGAACGAACTCGAGACTTACATCTACGAAATGAGAAGCAAG
ATTGATGACCAATATGCCGAGTTCGCAAGTGATGAGGAGAAGGAGAAGTTGAAGGCTAAG
CTTGAGGCTAGCGAGGTTAGTTTTTTCCCCAATTTGCTTGCACCTGGAATTTGTCATACT
AACTGTCAAATAGGACTGGCTCTACGATGAAGGTGAAGATGCAACCAAGGCTGTCTACGT
AGCAAAGATGGACGACATCCGCATGGTAGCAGGACCTATTGCTCAACGCTACTTTGACAA
GGTTGAAGCTGAGCGTGAGGAAGTCAGGAAACAAGAAGAGGCTGAATTACAGAGGAAGAG
AGATATGGCCGAAGCTGCTAAACAAGCTGCAATGGCCATGGAGGCAGCAGAGAGTGGAGC
AAATGGTGACGTGGTCATGACGGATGCCGAGAATGTTGAGCCAGAGGTTGAGGAGAAGTA
AACGGAAAATATATGATGTGAAAGGCGAGGGAGTTGGGTGGAAATAAATAGAATAGGCAT
GACGTACGTTGTGGTACAACTGCGAAGCTACGAATGATCTTATAGAATGAATGGATGTTA
TGAATATGAATATGACAAATGGAGTTTGAATGGAATGGAGTGATATTTTGTAATTTGATC
CGTTATTGTTAAAGATGTGGGCGTATGGGGTTATCGAGAGGGGAATCAGGGAAGGGGCAG
T
>49577df6-d0f5-44f6-bfef-64ca39764da0 (mRNA) 3938 residues [Bfab07:480758-484695 - strand] [genomic] name=Bfab07g01300.1
TACATAGCTATAAGAAAAAGGACCTCGCCCACCTCCCCCTCCTCCCTCCTCCCTCCAGTT
AAGCAGGGGTGAATGCTTTGCCTTCCTTTTGATATTCGCCTTCCTACCTGATCTTCAAAT
ACCCTCCTTCGACCTCGTCATCTTCCTTCCGCATTTAATCATTCTTTCAAGGGAAAGACT
CTGTGCTCGGTCGTCGTTGGAGCCAGCATAGCATACATTCATACATTGCCATCATATTCA
TTCGTTCCCACGGTCATGTTACTGTCCCCTTCTTAGCTTTTTACTTTGTCACCATAGCTG
GAAGATTGAATCTTTCCTTTTCCTTTCATCATTCCAAAAGAAATTTTAATTCCTCAAATC
GTTTGGTGAAACCTCAGTTCTCCTTTCGGGACCATTTCGCATCTAACGGGCATCCATTCG
TTTCAACCAAACATTAATTCGATATACCAAGACTTGATACTGCAGCTTTCATCCATTTCC
TGCTGTGATAGTCCAACCTGCAGCAAACCACGATAACCCGCATTTCATTCTCCTTTTCAC
CATCATTTCACGAAATCATACAGAAATAATCTAAGCCTCAAACCCGCCTTCCTGAGTGAA
TACCATTTATTCTTTCCGACATCATCTTGTGTCTAAACTCTTCGACCGAATAGGCGGAGC
GTTGCTCAAAATAATTATTCTCGAATTTTACCTGGTTAAACAGGAACTCGGACATCGTGT
TACCAAAGATCTCTGAATTACTCGGATTAGCCAATTTGCAAGAGAGTCATTGCTTTGTAC
GTTTGATTCATCACAAATTTCCTCACAGGCACACTCTGACGAATTTGCTTTTCAGTTACT
CATCCCCAGGCGGGCACTTTTCGAAACTTCGCGCATGGTGTTCTTCTGTCCCTCAACTTG
AGATACTGCAGTCGGCGATTTGATATTCGGTCCAGATCATACCACCCTTCTGCCGAAAGT
TTACCACATTCAAAACTGTTCTTCGGAGTTCAAGATGGTTCAATACGATACTTCACCATG
GCCGGTGAGAGATGTGAGTAGTTTGTTCTCTATTCAGACTCATGCCCTAGCTCTTTCTCG
CGACGGAGCTCTGAGGAGTAGTTCACTGACAATTTTGGTTCCAGATCGTCTATACCGCTA
TAATGGGTTCAGTCATGCTTGCCGCATTTCTCGAGTGGTTTCTCTGGCTGGCGGCGTTCA
TGTATTGTCTATTCAAAGTTTTCCAAAAGGCCGAGCACTGGTCCGTCCGGGTTTTGTCAA
TAATAGTGGCGATTATTTTCTTTCTCTTGAGGTACGAATCTATTCAAGGATATACATATG
TCGGCTTTGCTAATCGGGATCTTCTACAGAGCAATTTACCTGCCCATTATGGTTGTCACA
CTCCCTTTACCAGAAGGAGTCACTCAATACTTCCCCAAAGAAATGGTCAGCTTTCTTCAA
TGGTTCGGATTTTGGTCATTCGCGGCTCTTCTTACGATTCCATGGCTCTTTTGCGTCTAC
CAAATTGTAACAAATTCCTTGGGACGAAAAAAGCGTATAAAGCAAGTGTTGGATGAGCAC
TCAGCACCAAAGGTTGTGATTGTCATGCCATGTTACAAGGAAGAACCAGATATTTTGGTG
ACGGCTATCGATTCAATTGTGGATTGCGATTACCCTCCTTCTTGTATTCACGTCTTTCTT
TCCTTCGATGGCGATCAAGAGGATGAATTATACCTTAAGACGATTGAAGCACTAGGAGTT
CCGTTGTCTCTAGATTCCTACCCAAAGAGTATCGACGTCACCTACCGAACTGCCCGGATT
ACAGTCTCTCGATTTCCACACGGCGGAAAACGACATTGTCAGAAAGCCACATTCAAGTTG
ATCGACAAAGTTTATACCGAATACCTGAAGCGCAATGACAATCTGTTCATTCTTTTTATC
GACTCCGATTGTATTTTGGATCGTGTTTGTCTCCAGAACTTCATGTACGATATGGAGCTG
AGCCCGGGGAACACCAGAGACATGCTGGCAATGACAGGTGTGATTACTTCGACTACAAAG
AAACACAGTCTTATTACTCTGCTCCAAGATATGGAATATATTCACGGCCAACTCTTTGAG
CGAACGGTCGAGTCAGGTTGTGGTTCCGTCACGTGCTTGCCGGGAGCTTTAACGATGCTA
CGATTTTCTGCCTTTCGCCGTATGGCCAAGTACTATTTTGCTGACAAGGCTGAGCAATGC
GATGATCTTTTCGATTACGGTAAATGCCATTTGGGAGAGGATCGATGGCTCACCCATCTT
TTCATGATTGGAGCAAAGAAGAGGTTTCAGATTCAAATGTGTACCTCTGCTTTCTGCAAG
ACCGAAGCTGTTCAAACTTACCAATCTCTGATTAAGCAGCGTCGTCGTTGGTTCCTGGGA
TTTATCACCAATGAAGTTTGTATGTTGACTGACATCAGAATCTGGAAGAGATATCCAATC
CTGGCCGTCGTGCGATTTATGCAGAACACGATCCGAACAACAGCTCTACTATTCTTCATT
ATGGTACTTTCAATTGTCACAACTACAAAGAAAGTTCAAGATCTCCCAGTTGGATTTATT
GGTATATCACTCGGCCTCAATTGGCTGATGATGATCTACTTTGGTGCTAAACTCCGTCGT
TTCAAGATTTGGCTCTACCCATTGATGTTCATCATCAATCCTTTTTTCAACTGGTATTAC
ATGGTTTATGGCATCTTCACTTGCGGACAACGAACTTGGGGTGGACCTCGAGCAGATGCT
GGAGCTGCCGATTCGACCACAAGTCCACAACAAGTTATCGAAGCAGCAGAGGAGGCTGGA
GATGAGCTTAATGTTATTCCAGAAACATTCAAACCCGCTGCCGAAGCTCGAAACAACCAA
ATCGTTCGCCGCCCAACGCTTCCTTTATTGCCTCCGACTCGTCTCGAAGGTCGTTTCGCA
GCTGCGGAGAGACTCCCAGGTGGATGGTATGAACATGTCAATGACTCTCTTACTAGCGTT
GCTGTCGGACGCGTTGCACCTTCTGGGCGAAACCCCACGGGATCTAGAGAATCTATCGAT
AGTTACGTGTCAGGGTTTACCGGTACAAATTCAGTGTATATGCCAAGACGAGTGGAGAGT
ATTATGGGAGAAGAGGATCGAAAGAAGTACGAGATTGCTCAAGCCAATCAAAAGGCACCA
GCTGGAGCATACTACAACCAGGTAAGCAATCATCGTTCTGAGAAAATTGAATAGCGCTAA
CTATGTACTTAGGGATACGTTTATGAAATTCCTGATGGACCTGAGGCCAAGGGTAGCTTC
CAAGATTCAGTGGAATCTTTGGCGTCCATGGATGGAACGACATCAAATTCTTTGGCAGTT
CCTCAAGCATCTTCGTACCGAAATGGACGAAGTCCTCTGGGTCGTTTGTCTTTGATTCGT
TCCAATTCGAGGGATGACCCAATTGAGATGGACGACCAACGATCGGATAGAGATCACCAT
TCTGACAGTTCAAACTCTCCCGAACCGAAACCAAAACGTTGAGAAGAGTCTTGGGCGAAA
ATAGGGTTTTAGCATTCTGTATGGGAACATGGGATTTATCGGGTTGGGCCCAAAGAGCCT
GTAGGAAGGTTCATCGGCTGAAAAGTTCTACGGAACAAGCATAGGGGAGGGGTGAAATTC
TTGGGCGTTACGAAGAGCATTCACACAGCATGGCATCTGCATATTGCATCCTGCATTTTG
ATGGTTTTTTATACACCATATTGAAATGGGCATAGCGCGGCGTAAAAACAACCATACCAG
ACCACGAGCATAGCAAGGCACGTGGAGGAATTTTGCATCATAGAAGCCAAAGGAGGATAA
ATTTTGGCACGAGTTGTAATTAATGATGAAAGAAAACTGAAGAGAGGGCTACAGTACAAT
GATTCGAATAAAGTACACAATTTTGCTGTCAAGTCTAC
>7562af49-e1a5-49e7-8910-4e32cb917855 (mRNA) 3347 residues [Bfab07:489929-493275 - strand] [genomic] name=Bfab07g01310.1
AGTCTGGGAAGCAGAGCAGAGTCATCATACAGCAAGCATATACAGACAGTCCCGGTGCAT
GGGATCCTCTTGCTTTTCTTTCCTCTCTTCCACTTCTGCACATGTATTGATCCTCGCAGT
CATCTTGAACCGCCACATTGCATTCATTCTCATTACTTGATTTATTGAATGCAAAATAGT
CCAGGTCCCTCTTTCGTTCACGTCAATCCCCATCGAATATCAGGTCATTATCACGTCCTT
TCATTCGTCGTACAAGTCCTGCATACGATACGACACAACATCTCATCGGCAGAGACAAAG
GACTAGGGAACTACCACTTGTCACCCCGCCCCGTCACAACATCGTCCCTCCAAATCCACA
TTATTACAACATATAAACCCTCTCTCCCACCCTGAATCACTCGAAAATTACGTTGAAATG
TTCTTATAACCAAACGAACGGGAGCAAAATCAAAAGGCTCCATTTACACATCCATCTATC
ATGCCCATGTTTCAAGATGACCTCGGTGACGGCCGAGAGATATTGCCCGTTCAAACCCCC
AAATTGACGCCTGTTTCAATGACACCACCAGAAAGAAGAACGATCGTGAGGAAAGATAGT
GAAGAAAGCATTCGGACGGAATTATGTGAAGGCCCTGTGCCAGATACCCCCGAGGGATCA
AAAAGCATACCGGCTTTGGGTTTGGATACAAGCTTTAAGAATTCATACAGCGGAACATCG
GAGAGAGAGGATCTTATTGAAAGGTTGAAAAGGGGCGAAAATTCGAGTTGGTTCCCGAAT
TTAAATGTGTGTGCATCTTGAGCTCCAATGCATGTGATTTTATATTGACAGTGAATACAG
TTGGAATCCCTCCTTCATGGCCAAAGCCCAGAAACTCCCATTCGAAAGACCTCGAATCAT
TCGAATTCGTCTTCCCTGTTGCCATCTCCCGATATATCCAATACTATCAGACCCTCGTCG
GTAGACAAACCTAGCTTACAAGCTGGTCTAGAGATTGAACGGCCAAGGTCCGCATTACAC
AGTGGAAATTTTACTGAAGGTCCGCGGCGAACTATATCTGGTAGTCCTGGGCAGGATATG
AAGAGATTTGGCACAGTAAATTTACCATGGCTAGCTACATCTCCACCGCGAAATTTTACT
CCCTTTCAACTCGATCCTCGGTTTCCATCAGTAGATAGAGTCGAAGCAGAGTTAAGAACA
AGAACTCGTGCACCATCGTTATCCTCTTCATACTCTTCTAGCTTTGTATTGAAAGCGCCA
ACAAGCCCTCTAGTACAATCAGAAAGTAACGACGATTTAGATTATACGTCAAATTTAAAT
CCAATAGACATTTCTCCCGGGACACCTACAACTAACTCAAGACGTCATACTCTACAGGCT
TCACATTCAATATATTCAAATAATTCTATACCGGGATCCACTGCTTTCAACAAACCTTTC
CCGAGTCTTAGGAGAGACAATACATATCCTTACCAAGCTCATCAACCTCGGAGATCTCTC
GCCTCCAATACAATGCCACACTCGGCATCTTCTCCGCAAACACCCACCTTCCTGCGGTCA
AGGAGACCTTCATTTTCTGATTTATCACCTCTGCATGCTTCGATGGTGGGATCCTACGAA
GAGAGTATCCTTCGGGGTCGAATGTCTACTACCCCCTCTAAACCGCTCGATTTCGTTGCT
CAAATAGGGGTACTGGGGTTCGGAAAGTGCAAATCGAGTCTCAAATGTCCACCTCATGTG
ACCTTGTCATTTCCGGCAGTATTTTATGCCTATGAATCCACAAGTCACGGTCGGAGAGGG
AAATCAGATGATGGGCCTAGTCCATATGTTGGCTGTATTGATTTAGAGAATGGATTGCCA
AGCCCTGAGAAGGCAAAAGACAATCAAAAGAGGAGGAGACATGCTACGCTTGACCGAATA
CATATGGACGATCTCGACACCAACCCATCAAGTTTAGGACAAGTCTCAGAACAAGAAATT
CGTAGAGCAGGAAAGCAAAAACGTCGATCCACTTCTCCACGAGAACCCCCAGGTGGTAGC
TATCGTATCCCCGAAAAAGGGCAATTGCAAATCATCATTAAAAATCCTAACAAAACAGCT
GTCAAATTATTCCTCGTCCCATATGATCTCACTGGAATGGAACCCGGTACCAAAACATTC
ATCCGTCAGCGTAGCTACTCTGCTGGACCCATTCTTGACTCGGCCCTCTCATCTTCACCT
CATCGATCTGCACCCATTATTGATCCACTCGCCGAAAGACCTACCCTCCGCTATCTCGTT
CATATCCATATTTGCTCACCAGCTCGAGGTCGCTACTATCTTTACAAAAGCATACGAGTC
GTCTTTGCCAATCGTGTTCCAGATGGTAAAGAAAAGCTTCATAACGAAATCACTTTTCCA
GAACCGAGATTCACTACTTATAAAGCAATTCGCGATTCGAGTCTCGGGGGTGCAGGTGCG
GCATTGGCGGCGGAAAAAGCATTTCGGAGGAGAAGTTCTGGATTTCCTCTGAGTGGAAAT
AAGAATTTTGATTTTGGAGGTGATGACGGTGCATCAAGTAGGGGAGTGGTGAATCCTATT
CCTTTTCAATTTTCTGCGAAGAGGGGTATGATAGGTGGAGATAATGATATTGGACCATTG
GATTTAGGGGCAAGGGAATCATTGAATTTGGAACATAACGTGAGACCGGGTACGGCGTTT
GAAGAGGTGAAAATGGGTAATATGGGGACTGGGATAGGGACGGGATTATATGAGAAGTTG
AAAAAAGGCGATTTGGGGTATGGTAATGATGGGTTCTCTCCAACGAGAACTAACACTCCC
GATAGGGAGGGGAGACAATTTCCCGCAGAAGGATTGTTGGCAACGAGATTGAGGGAATTA
GGTGTAGGGCTCTCGATGGGGATGGCCGATGGAAATGACAAAGAAAGAGCGGATCTTGAA
AGTGAGAAGCTAGGGGGAAATTCATAGTAATTTTGAGGATCGAGGTTTGTAAATATTGTA
ATTCCATTACTTGGAGTATAAATTAGCTGGGTAAGTCTAGGGATGGCTTTTTGGGTATTG
GCACATAGCAATTTGGTATTGCATCGCATGGCATCGCATGGGCATAGGAATTGTTTGGCG
CAGTGCGAGTTTCTCGCTTGGAAATTTTGGCATAGGACTCGGTTTTATAGATCGAACTGG
AGCTTGCTGGATATACTACTGGTGCTACTTTAGATATAATGGAGCTTGTAGTTTGATTCA
TTATTGGATAGCTTAATACATGTATGCATGTATGTATTTTGAATAGTAAATTAACGAAAA
ATTGAAAAATTGAATATATGTCATTTCTGGGAGAGGGAGAGAGAAAC
>f918aceb-84bf-4fa9-a52c-2e403fa2228e (mRNA) 1270 residues [Bfab07:493453-494722 + strand] [genomic] name=Bfab07g01320.1
TGAATCTAGCACAAGTCCGCATGTGTAAGAAGTACCCACCAAAATTTTCTCACAAGACCC
TTCCAATTCAATTCATTCCACCAAGGTATCAATCACATCACATCACATCACATCAGAGAC
TCTCATATTCGTCATTCCAGCACTGCTCTTTCGCACTTTCCACTCGACAAATTCCAGAAT
GGCTCCTACCAAGCGCCCCTGGGAAGAAGATCACCCATCACGCTCAACTACCAAGAAACC
TCGCCACGGCTTCAAAGTCGGCCCCGACAATTTGCCTGATGGAACTTGGCGTCGAAAGGT
CATTGCCATTAAGAAGGATTTGATTCACAAGGCGAAAGTCAAGAAGTCGTATGCGAAACT
AAAGGCGAGAGAGCCGTTAAAGGATGAAAGGAATATATATGCCGATGACGAGGACCAAGC
GGACGAGGCAGCAAAAAATGAGGAAAGGGAGGATGCTGTCGAAGGAGAGGAATCAGTGGA
GCTACACCCGCAGAGAAAAGCTATGCTTGATGAGCCCGAAGCCGATACTGCAGCCAAAAC
TGTTCCACGTTACTCGAATAATTCTGAAGATGCGAAGGACAGGAAGAGGGAAAGAGGTGA
AAGGAGAGCAGCAAAGCCGGCATATTTTGCAAAAGAATTAGCATTTGCCGAGAAGCAAAA
GGCAGAACAGCAGGCGCGAAGAGAAGAATTTGAGAGGAAAGAAAGGGAGAAGAAGGCTAA
AATTGAGGAGAGGGAGAGATTCAGGCGGCAGATGGCAAAGGCTAGAAGTGGAGGAAAGAA
TGGACAAAGAAAATTAGGAAGGGAGAGTCAGGTTTTATTGGAGAAGGTCAAGAGAGTTGT
TGGTAATTGAAATGTCGGCGGGATCTGGGTGAAGTCAAAGGATTGAAGGAGTCGCGGGGG
GACTTTTGAATGGATGTAATGAAAAGTATTAAGAAAGGCAGTAGGGAGCTGCTCAGGGAA
CGCTGGAGAAACTTATGATACCCATGAAGTTATCACAGATAAATGGACAAGGAATTTATC
TAGAATTATGGCGTTATGGCCGGTGCTCCCAACAAGCGTTTTTGCATCACGGCACTTTTT
CAAAGGCATATCTAGTTAGTGCCTTGAATTGAACAGAGATGAAGGTCATTTCTTCACTGG
GACTTGCATTTTATATTGAAAAGGCATCATTGACGCTGCTATACGACATGCTACATACTC
CACTCTCCTAGTCCTACAACGTGTAAATTCCTTCGTCCGATTGTCGTACTTCAACATGAA
CAATTGAATT
>d510374d-0aa9-4608-a548-7dbb0cfa07de (mRNA) 2896 residues [Bfab07:494639-497534 - strand] [genomic] name=Bfab07g01330.1
GCACTTTGAAATCCTGTCGCATTTTCCACTACGATCTATACGGCTTACAATCTACCTGTC
TTATGAATGGACTCGAGAGCGCTTGCTCGTTATGTACTGCAGTCTGTACTGCCTATACGA
TTCTATAGGCACGATTTACATACTGAGTATAGACTCGAGAGCGCTAGCGCATTTTTCCCT
ACGGCTTGTACGGCTCATACAATTTTCTCGTTGCTAGGCGAGGTTGCAAGATGAATTTAA
CAACTTCCTCGCACCGCTTGAGAAGAACTATCTTTCCCTCTTGCAATACACAACACTACT
CAATAGTTCAATCTCCAGAGACAGTCGGGTTGAATTCTCTCCTTCCTTACTGGATACGTG
CTCTGCCTCTACGGTTGAATACGTTGTTAGGCGAACTCTTGAGAATTACTTAACGGTTCT
GAATTCCTTCCTACTTTCAACATCTCACAACCACATTCACAATAGCCACCTCCTCTCCAA
GCATAATTCAACATGGAACAACATAGAGGTACCAATTCGTTCGGGAAACGCGACAATGAT
GAATCACCAAGGCGAGAGGAATATCGGTTCAGGCCACAAAGAGAGATGGCGCAAAATCAT
GAAGTCTCGAGAAGAGATGCAAACTCGTACGCTCCAAGATACAATCACAATCAAATGAGA
AGAAAAATGGATAGCTATAGACCAGGTAGACCACACTGGCCTCGGGTTCCACATCGCAAT
CACGTAGCTAGAAACTCTTCGTATCCCGGTCCTTCTACGCATGACACCACTACTCAGGAA
TCACGAAGTTCACCCTTCGAAACCGCGAGGACTTCACTTAGCCGTGCTGCAGGAGCTGCA
AATACATCAGAGGAGTCGGAGTCGGCTCCACTGGTCTCACATCATGCAGAAGCCGTCCCT
TCTACGAAGGATAAAGAAACTCCTTCATCGAGAGATGAGGATGAGTACGAGCTCATTTGT
GAGCATGCCGGAGGTCCACTACGCCGATTCACCAAGAAAATGTGTGATGTCATCACTGAA
ACGATTACAGAACATTGCCATGACGATACCATGAGCGCAATAGATATTCTCAAACAAGCG
TGCATAAATCTTTCGGTAAAAACCGGTACTACGCTCGAAGTGCACGACTGTTGGCTGTAT
TGGCGCAAGAGGGGTATGAGAACCAATATCGCTCAGTGGTGGCCTGATAGTCTAGATGAT
GTCGATAAGGAGGTGGCAGATTATAGGCGATTGAGAAGTGCAAAGTCCAATAGAGCGAGA
GCAGCATATGCAGCTAGACTCGCTACAGTACCAGTCGCCTCCTCTAAGACCGCTGGGACT
ACCGAGGCTTTCGCGTCATCAGACCCAGTCGAGGAACCTAAAGATTGGCCTCGAGAAGAG
AAACTTCTTCTTTTTGCAAAGCTTAAAGCTAAGAGACCTATTCAACATCGTCTACATACG
AACATGCTCTGGATAATGGTTGGGCGAGCGATGAGAAGAGAGGGATATACCAGAGGAAGG
GATGAGTACCGTGAGTGGTTTGAGAAGTATGGTCGCGCGTATTTCGACTACGACGAAACC
CGCTATTTTTCACAACCTGGTAATCCTCATGTCGGCACTGGCAGAATGCAAAATGGGATT
ATGACACCAGAAGACTCCCCAGTCGGCGATGCTCGCAGAAGAAGAAGAAATTCGAATTCT
GATGGCGTCAGGGCAAGACTTCGTGGTACCATGGCACCAATGTCTCCCAGCGTTCCCAAA
ACGCCCAAACCCAACAAGCCACGGATGTCAACCACGGTACTACATGATATGAAAAGCTGG
TTGGGTGGCTATAGAAATGTAGACAAAACAGCAAAAGTCGCGGAGGAATTCCCTCTGCCA
TTAATTAAGCCATCCGAAGGCGAGCGTTTCGGACCTTTCACTACTGAGAAGCAGGAAAAT
TATGAACCTCCTTCATCCGCAGCGGGCTGCCTGCCCGGAAGCCTGTTGTTCGTTACCGAA
GATGAGGCGCAAAGCGAGCGAGATCTCTTCCCGTCAGCTCTTGATGCGACTAATTCTCAC
TCGTCACCAGCGCCTGCACTAACCGATGCTCCATCCACGATATCAGATGAGACAGGTACG
CCTAAGGAGAGAGTGGAATCAATTGGGGAAATCAAGGCAGGAGAAACGATGGCCCCCGAT
GAGAAAATCGAACCGGGAGAGACAATTCCAGAAGATGAGAATGATGCACCATCATTACAG
CCCAACGAGACAAACAGCACACAGGATGGCATACAGTGTACCTCTGACGAGTGGGGATTC
GCCACTCCGCCTTTCATGCGACCAAGTGAAGTGGATATGGCGTGGATAGATGAGTACAGC
GATTTCGAGTCCAGCCACATCTCAGCAACCACAAATGCGAGCGATCCTTCTACATCTGCA
GGACATCCATCCTTTGGCAATTCCCTAACATCAAACGAGACAATAGAAGAAGTCCCATTG
ACCCAACCGAGCACAAGTGATGACGAGTCCAAAAACAACACCAGCTCGGAATCCCAGGCG
CAATTGTTGCGAGAACAGCAGGAGCGAACTGATGTCGAAATTTCCAACTTGCGAGCGAGT
TATCTCAGAGTCAAGGAAGCGGAAGAGGACGAGGAGAAGAAACTAGATGACACTGCGCAG
GAATTAGATATCATGGTCTTGAGGAGAGCCGAGCAGCTGAAAAGCCAGACTGCATATCTA
GCCGAGATGCAAAGAATCGAGGCGGAACTTGAGGAAAAGAAAAAGGCCAAGCAAGCTTTG
AGCATTGCTCTGGAAGAACTCGAGTTTTTTGGATAGGCTGCAGGGTATAAGGAATTCAAT
TGTTCATGTTGAAGTACGACAATCGGACGAAGGAATTTACACGTTGTAGGACTAGGAGAG
TGGAGTATGTAGCATG
>786cbbda-c0e8-41e3-9b1d-4eaf4d095eda (mRNA) 2347 residues [Bfab07:498658-501004 - strand] [genomic] name=Bfab07g01340.1
CCGAATCTGTTAAAAATAGACTTTACGCGACAACTCTGTTGCGGCACAGCACGTTTGCTT
ACGCGCCTTCCCGTTTTCCTGTGTCTCATCTTCAAATACTTTGTAGGACTTTGTCATTAA
ATAATTGCCAGCTCGCCCATAGCCAGCAACTCAAGAAGACTTTATACTTTGAGCTCCTCA
TTGTTCACATTATCAACAGATATTTCTTTGCTACCACAACTATCTTGCAATTTTTATTGA
ACTTCCAATTCTACTTTTTTTTTAGATCATTTGCAGGTGCCAGAAAATACTGCAATGGTA
AAGGGTAAAAGATGGCAATCTGAAGAGGTTGCCAAGCTGAGGGAGATCTGTAGCCGTCAG
GCATATATTAGCATACGCGGATCGAATAATCCATTCTGGGAGATGGTTGCCGGTGAGATG
GAAACATATGGATGGAATCGTCAAGCACATGCCATTTATTTTAAGTGGATGCGTCTGAAT
CAACCACCTCGACCGAAATCGTCAAAGAAAAATTCATTTGGTTATGGGGATTCCAGTGAT
ACGGAGGGCGAAGAAAGAGGCGAAGGGGAAATTGAAGACTATGAGGGAGAGACTGACACT
AAAAGTGACGTTCTGTTTCAAATTAGGTCCGGAGACGATGCTTCTAAACCTTGGGCGAAA
GGAAGCAACTGGTCGGATGAGGAGAGTGAGATTGCATACCAATGCATCAAAACCCAGCGA
GATAAGGAGAAAGAACTCAAACTTGAACCCATCACGGCGGATCAAATTTGGCATATGGTG
GCAGAGGCTTTAGAACAGCATCAGATCTACCGAAAAATTCCAAACATTTACACCTACTGG
AAAAATAAGGGGCGACAAAAGTACAACTTCGATGAAAGAACTGCAGATGCGATTGAGAAA
TCCTCGCATGGAATACCTCGAGTTCGTGGAGGGAAGGCTGCACAAAATTCTCCGGGACAT
ACAGCGTCTAAAGTTCATACTTGGCTTTCGATGCCTGAATCCTCAACCGAAGACCATTTA
CAGGTAATCAATCTTTAAGCCATTGCATACAATAGCTCGGACTTTGCTGACGATGTTAAA
ATAGCAGAACAATTCGAAGGCTGAGATGGCTATGGAAAATCTACAAGTCCTGATTTCACC
TTGGCAGCATGATCTGCTGATGATTGAGTATAAAAAATACAATCGTCTAGACAACCCCGT
GATGAACCAGTTGACGGAGGATACTGGTTTGAGCAGAGAACAGATCAAGGTACGAGCGCA
TTGATTAGGTCACTACTCGAGTCCATAGTCACTAATCAAGAGAATTAGTTGTGGTATAAA
TATCAGAGAGCTATGGATGCGAAAGAAGCAAACCTTCAGAAGGAAGTTGAGCTACAGACC
GGAGAACTATCCACTCCTATTCTTGATGAACCGGAACTGCAAAGCACAGGATTAAAGCGT
TATCGCGTGTCAGACATTGGTTATTATCATCAAGCAGAGGAGGAACCAGCTAAAAGAGTC
CGCCACAGTCTGGGCCCGGAGATTCTGATGAAAGATCATGGAGGAATTCTGGTTGACTCA
AAATCTCAGGTAGGCTCAAATTTTTGTTCGATTTTGATCATTCAATCGTTTCTTTGTTGA
GAATTCTTCTAACATGGAAGCTTCAGGACAAACCCGAGATTTTCGGTCGCCACTCAATTG
TACCAGAACAGAATGAACTTTCAACAAATGATGTTGCAATATCAACTGTCGAAGTCCAAC
AACCTTCTCTCGAATCTGCAACGCAAAGAAAAATTCCGGACATCACATCTAATGTGACGA
GCGTGATGAGAGAAAATCGGGAATTGGAACAACAAAAAGTACACGCGGCCGAGGAGAAAT
ATAGAGAATTGGAACTCGCTATCATTGCTCACAAGAACAGAGCAGATCTGGAGCTTAAGG
CTGCAATTGCAAAAGAACAGGAGCTTACAGTTCAGCAGGAAATCCGCGAGAAAGCCACGA
AGCGTATTGCGATGATTGAAAGCTTCATCGACGACTACTGAGTGTATTGTGCTATAGGGA
TGGCAATGTAATTTCTTGGGGTTGAAAAAAGTTTGTTTCTATGCCTCTACTTTAGTTGGT
GGTTTTCACTACTCGAGTTATTTTCGTTGATAATATCGACCTTGAAAGATACCTATCGAC
ATGTTTTTGATTCTTCCTACTCGTCTTGGGGGATTTGAAGTCCTTTTATGGGCCATGGGG
TACTTTCTTGCTTTCTCTTTATGATAATTATGTATACATATAGAACGACTTTAACAAAGG
GCAATGCGTCTATCTCATTCTCAATCGTAATTCACGTTACTAGTGCGCACTTGTCGATTC
GGATGGT
>64677fea-30df-436b-bc6e-a5ff37ce0702 (mRNA) 1121 residues [Bfab07:501836-502956 - strand] [genomic] name=Bfab07g01350.1
TTCGTTATAAAATCGAATTCTTTGGGTGTAAGTATACGTAGTAATACTGGCTTCTCCCAA
GAATATCAAGTGCTTGAACCTCCGCCACCTTGATCCGTCATCATGACCAAGAAAATCGGT
CTTCAAGCTTTCCTTCGCAGAGAGGTTATGAAAACTAAACTTCAGGTTCCCACAGAAAAT
GAATCCCCAAGGTTTACAAAGGAAGCTTCTATGCTATCAGCTCAGCCGAAAATCTACGAA
GAGCCGGAAGGAAATACCTTTCGGAACGTATCTGATGACAAAAAAGAAGACTACAAAGCC
CCACTGGAAAGATTGAGACATTCAAGCACGCCATTTGCAGTTAGGTATGAGATAAAACCA
AAATCCGAACTAAGGATTCGGATCCAGGAACTTAGAAAGCAACTTCTCGCTGTCATTGAT
ACTTCCTTCAAGAATTTGCATGAGAGAGCTATCAGTGCTAAAGAGCGCGATCGTCTGTTA
CGCTCCATCGAGTGCTTAGAGGCTCAAGAAAAGAGAGAGAAAGATAATGCACTACGAGGT
ATGGGTTTTGCATGACATCCGATCATCTCATGATACTGATAAATCGGACAGCTACTGGAA
ACCTCCCTGAGCCCATCTCCGAATCTGAGAGAAGACAACGGCAAAAGGAATTAGAATTAG
TGAAGAATGCCCTAGCGGGAAAAGAAGTAAGACTCTCGTTATCCGCCCATTCTCCTTGTC
ATTTATCCACATGTACTGATCGGTCCCTATTTCAGAAAGTCAAATCCCCAATCAAACGTC
CCTTTCGTCCACTTGACGACGATCCGGATGGCGAAACTCGGAAAGCGTTAGGACTGCCAT
TGAGAAGACGCAAGCTCAAGAAAACGGGCAAGTGGGCAAACGAGCTTTGTTATGCAGTTC
CGGAGTTGAGGTATAAGGATTATGGAGTCGAGGTTTTGAAAGAAATTTTGATGTGCGGAG
CGGATGAGGAGCAAGAGGTGTGGTTGGGAAAGTGGTTTAGTAGATTGGATGCAAAGATTA
CTACAAGTAGTGAAGTGAGAGGATCTGCAAAGGAGAAAAGTACGCGAAGAAAAGAGAAGG
GCCCGGCCCTTTGGTAAAGGTTGGCATGATTTAGAATATCT
>92944867-b7cd-4571-b030-80f7d36f9a1d (mRNA) 1721 residues [Bfab07:506301-508021 + strand] [genomic] name=Bfab07g01370.1
CTTTTCAAACGACATCATCTCATCCACCAATACCTACTTTCAATAAGAGCAAATCATCAA
GTCACTTGCTGCCTTGAGTACATTGAAGTTACGCTATCGTCTCTCCAATTTTCAATCCCT
TCGAATTTTTCCAACTACCAAAAAAATCTGCGATTTCGAATTTCGGTAAAATGGCATCAC
CTGATGAGATTTCTGTCAAGGAAGTACCAGCTCCCACTAAGGATGGAGAGGTAGAGAAAG
CAGGCGAACAGAGACAGGTAGAAGTTGAAAAGCTCTCGACACTTCGATCAGTAAGTCTCG
ATGTCGTTGGTGTCGAAAGTGTCAATAAGGAGGCCAAAAAGCGTCGTACATACAAAAAAT
GGTCAGAAAAGGAAGAAGTAATTGTCCAAGGCATCGTTGATAACCATAAAACCAATCCCG
AGACATCTAACATGGGTCTTGTGGAGTTGGATCGATATTCAGTCACAAAGCTGGCAGATG
CAGGATTCTTCAGAACACAACTGGGAGTTAGTGGTTTCCGTGGAAGAAAAAGTTCTAAAC
CCGATTACAACCCGGTCGTCGATCTTGTTGCTAATATGCCTGAATCAATTCGTTCTATGG
AGGCAAATTATAAGCCATTTGCCTCGGTTGCAAGAGAGCCAGTTCGTAGACCAAGTACAG
TCGTTTCCCAGAGTGCAAGTGAGTTATGGGTCATCGTTTTGATTGAATTATTCTAAACCT
TTAGCTTCATTGCAGGAGTGGAATACTTTGAGTAAATTGAAGAACAGTCCATACGCTCTT
AATGGCAAGCGAAATTACGGAGATTTCAACGGCGATCTGGCAAGAGAGAGAGCCAATGCT
GCTACTACTGCTACTTGGAAGCCACAGGCACAGGCATCTTCCATGGGAACCAACGGCGTA
TTTGACCCAGCAATCAACGTTCCTTTTGACATTTTGAAATTTGGTCAGCAGAAACTCTTG
CTAACATAGTACAGCAGCAGGGCTTCCTAATGACTCCTGGATCCAAGTCCTGTGAAGTTT
CCAAGTCTCAAATTGAGATGGGTTTAAACATGTTGCCACCATCAAAGCGGATGTGTGTCA
CCAATGGTAGTAGAGGAAATCCTATTGAAGCCCGAAACGACCCACTATTAGGTCAACCAC
AGTCAGAGAGTGATCGGATTGAACAAGCCAGAGTCTCAATAGTTAGTCTAGGCAAGATAT
TATTGGGAGCTATGACAATGCAAGCGGCGCATGAGAATATTGCAATGACACACGAGAATA
TTGCAATGGCACACGAGGCGCGGCGCAAGGAGGCAGAGAAGCTGGCAGTGGAGTTCAAAA
AGAGAGCTCAGGCGCAAAGAGACGAGATCGTCAGAATCCAGACCTTGAACCCCGAGTTAA
AGAACTATGATGTGTGTTCAAGCCCAGAGATAGAGGAGGATATGCGAATCTTTGAGCTAG
AGTTAAAGAACAATCAGGTATTCCAATGAATGTATAATTGATTGGCTTTGGTTCTGATGA
CAACGATGATAATGATAAAATTGTGCGAAATGAAGTGAAATCAAATGAATCAAGACTTGC
CTTTCAAGAGGTTCAATACAAGATTTGCCAACGAAGCGGTAGTCTGCAACATCTACCATT
GAGGAGCTAGCATTAAAGCGTTGTTCTCCAGTATATTAAGCGAGACTGGACAGAACCTCA
TGAACACCAACGCATTCTAAAAACTCCAATTCAATTGTCGT
>66b5a92e-6ae0-4766-bbd7-613c5d77d825 (mRNA) 5973 residues [Bfab07:511578-517550 + strand] [genomic] name=Bfab07g01380.1
TATATTTGGACTCAGAGCGGTCTCGGGTGTTTATGTTATATGATTGATCTCTATCTTGGG
TTTTAAAGGCTTAGACCGTGGGCGTTGTCTCATCTCACGACTTCCACTTCCACTTCCACT
TCCACTCCCCCTTCCGCTTCCAACTCCAACTCCAACTCCAACAACGTGCTGCACAGGACT
GCCACCAGTAGAGACTTTGCCCGCCATCGACCGGCCCCCTTGGGAATATATGCTGGTCGC
TGCAGGATCATTAGCCTTTCCTTCTACTCGATTTCCTCAAATCTCACCTCCCTCGAGCCT
CCTTCGCCATTGTTGTCTCATCTGATCTGATTGATAAGTGTGCGAATGTCCCAACCAGAT
TCACGCTGCGACCGCGGTGAAGCAAGAGAGATACACCGTCTGGCATAAGGTTTCTTTTCT
CAGTCTAGCCCTTCGTCTTCTCCATCTTCGTCTCTACTGGGCATTTCTAGATTTCCCGTG
CCCAGGACTAAGATTACGTTTATATTGGCACAGGCACAGGCACAGGTGCTGGTACTGGTC
CTGAGCTACTTACTTATCGATAATACATCTCACAGCAGGCTGAACAAGAAGTCTCAAAAA
CCGAGTCGAATCGCAACGGCATTCAGTCAATACCAGTAGTATTTTCAAAGGCGTGGATTG
ATTTGTTTTTGGATGAATTCGTCCAGCATATATCTCATATCGTTCTCCAGCAACTCAAAT
CCCATCCCATCTCATCCCTCGATCTTTTCCCGTCACTACTAGGCATTGCTAATTATTCTC
TCACCTCGCCCGTCTGTTCTCTCCCATAGACAACAACCCTTCAACTCGTTTTCTCCACCC
AACTCAATTGACCCTCAAACTTCGCGAATCAAGCCCCAGGAACGTTTCTTTGATGATCGT
CTATTCGCACTAGCTTCTTTTCCCCTTGCGAACTTGCATACCTCCGTAAACAATTCTCGA
ATCTCCTACAGACCGTGCGCTTTTACACTCTAGAAACCTATCCCGACAAACCTAACGTCG
AGAGATCGCATCTGTCAATTCATGTTCAGCCTGGGTCCACCGTCCGTGATACTCGAGGAG
GAAGTGTATCTGCAGAAATAGAGGGATATCAAAAGGGATACTTTCGAGCGTCGGTCCTCA
CGCATATTTGGCAACATGGAGTCGCCAGACAATAGCACATATCTGGAATCCCCTATGGAG
GGTGACGATGTGGCATATCCGTGTAAAGGATGTGGTGATGTGAGTGTCCCCGTCCCATGC
ACCATAATGTGTTTACGAATCTGCCACTAAAAGTGATTCTTTTGCACAGATCCTCGAGGA
GGGAAAAGCCTTCGAACTTGGTAAGTTGTGAACTATCCCACAATCTTCTTCAATTCCTCT
ACTATGCGTTACGTTGCTTTATTTGATTTGAGCCTCGAGTTGCACATTGAATATCCGAGA
AATCAATCAAATGAACCCTCCGACCTCGAAGTTTAACAATTCTAACGATCCTGTAGCTGG
CAATCGATGGCATTTAAATTGCTTCCGATGCAATACTTGCGGAACTCTCCTGGATTCCGA
TGCGAATTTGTTACTCCTGGGTGACGGGTCCCTTATCTGCAATAATTGCACTTACAGCTG
CAGTGCTTGCAATAACAAAATTGAAGACCTCGCTATCCTCACCGGTGACCAAGCATTTTG
TGCAACATGCTTTCGATGCAGGAACTGCAAACGCAAGATCGAAAACCTTCGTTATGCTCG
CACATCACAAGGAATATTTTGTATGAGCTGTCATGAATCACTAATGGCTAGGCGGCGTAA
AAAGTCAAGGGCCGCTGCGAATGCGAAGAAAAAAGACGACCAATCTCCCATGCTTGTCGA
CAAATCACTACCCGCCCTACCACCGAACGCCGTTCCACAAAGCGCCTTCTCCCCTGAACG
TGAGATCCCGGATCCTCACAATGCAGATAACCCTACAGAATTATCACCAAGGCCGCGGCC
AACATATTCTCGTGCAGATTCCTCATCTAGGAGTAGTTCTCGAAAACCTCGCGATGATAC
TTCCTCTCATCGAGCGTCCACCGATACCACAGGCCGGGATGGATTGACGCTTCCAACGAC
GACGTATCGAAATAATAGATATTCAGGGATATCGCAAATGTCCGAGATTGGAAATGGGGA
TGGAGAGAGCTTTTTCATACCTCTGGCTCTGGACCCAAGCCCTGCGCCAACCTTGACACC
GAGATCTACGTCGACATCATGGGACACAAAGAAGACGAAAGAGAATCAAGCACCAGACCG
GGATTATTTTGGCGTGAAAGACAATGTGCGAAGTCAAACCGAACCACAACCACAGAGACG
ATCAAGGGATCTGAGGGATACGAGTTCAACGTCAACACCGCACATCGCATTCCAAGATAA
GAACCAACCATCCGACGAACAGTTGGCACAGATCAAGGAAAGCATACGCAGAGCAGCCAA
CGGCGCAGGCACGCCTGCCAAAGAATCATCTGCATCTACGAGTGATGATACTCTATTACA
ACATGCAACCTCGCCAACCGCTGACGCCCCTGATGGAAAGACACAAGGATCTAGTGAAAA
GTTCAGGTTAGGTGATGTACCCAAGGGAAAGCGGACTGGAACAATGAGAAGCGATTCTCA
ATCGGATTATACTGGCAGCGAGAGCAACTCCTCGAAATCTGCCTTGTCCAACATACCCAC
CAGGAAAGACAGCAACATGCCAAAAATGGACTCTCCAAGGACTTTACTGGCAGCAGACCA
GATTACGTCCAGAGCTTCACTGGAATCACGACCAAAGGACATGGAAAGTTCTACTGTTTC
AAGAGTCAATTCTGGGAGTTCCAAAGTCTCAATACCCCGCAAGGAGATAGCCTCAGGACC
CGTGAAAAGCCACGTTAGTACAATGAGCTTATCCTCCGGAACAGAAACCTCTCCATCCAC
GGAATCCTCTTCCGAAGGAACAGCCCATACCCCGACAGTGAATGGCAAATCAATCTCTGG
CCCCTTGTTACAATCGCCTATAGATGATATGGTACCGCCAAATCGCTCGTCAATTCGTCC
TTTACCAAAACAACAACTCAGTGATACATACATGACTCCAAGAGCACCCCCAGCGCCGCC
ATCGGCAGGCTCGAATGGTACCGCTTCATCGCCTAATCTACCGAGGTGGAGTGCTGGCGG
TGACCTTACCATGGATGAAGATATGGCTAGAATATTTGGCAACGATGAAGGCTCACAATC
TATAATTCGCAGAGTTTCCAATGCTGTACGCCACGTTCGAAATACAAGCAGTGAAGCAAG
CACTTCTGCCCGTGGCCATGGTCGTAGCGTCAGCGAAACAACCGCACGTACTCCTAACTC
ACCACGATGGCCAAAAACACCAATTGTAGAAGACACTAGCGGACCTAGAGATATTAGTAG
CCCGATTTCTATGAGCTCGCCCAATCCTGGGGATGATCCAGCTTTGCTCAGAAGGCAACT
TCGCAACTCCGAACAAAGAGTTGCAGAACTTGAGAGGCAATTTGTAAACGAGAAAGATTT
AAAAACACTAAACAAAAAACTCATTGAAAAACGAAAAACTGTCTCGGTTCTAGATTCTCA
AACGGAACTTATGATCCGCCAATTAGAGGTTCTAGCTGGCTATGTGGAACGTGCCAAAGG
TTCGAAACAGCCACTTGACATTGCTGAGCTGGAAGATTCTGCCATCAAAGAATTTGTTCA
AAAGCTTGATCGCCTTAAGCAGTCGATGTCTAGCGCAATTGAACAACTCTTTGAGGAGCG
AGATGAATTACTAGAAGAAAAGAACCAAGCTATTGCCGATCGTGATAGAGCTTTAGTTGA
GTTTGAGCAATTATCATCTAAGAATGCACAACTTGCAGACATGAATAATGATCTTACCCA
CCAAATCCAGGAACGCTTTAAATCGGCCAATACCAATATGGAAAGCCCAAGGCCACTAAC
AAACGGTCTGGGAATCTACACTCACCATAATAAGGATAAATCTAACGTTTCCGTTCACCT
AGATAATGCAAGCCTCCGCCCATCGGAAAGCAGTAGTGCTACTTACAATAACTCGATCAA
TAGCTATCCACACCCAATGGAACAGGACCCCAGCATGGAGCCAGCGACGTTATTATCAGC
TCCCCATGTCGTCAATATCCGCAAGGGACAAGCAAAGAAGTTTAACTGGAAGAAGGGTGG
TCAAACTGTTGCTAAGGGAGTTACTAAAGGTTTCAAGGGTGCTTTCTCCAGCGGACAAGA
GCGGCCATTAAACCAGTGGCCAGGTCAGACTGGTGATAATATTGGCATGCCTTACAACAT
GACTATGGAGCACGTGCAATCTCCGGCACCAAATGCCTCTGGGACAAGTTTACCCAGGTC
TACATCAAACGACCCCTCTCGTCAAGGGTTTGGATTATTCAAGAAATCACAAACTATGCA
AAAGTCGATGTCCAGTGGTAATATTCTCGCTGCTGAGAGCCCGTCAATTCTGTTCGGTTC
TGATCTTGTTGAAAGAGCTGATTATGAGCGTCGGCAAATTCCAAGTGTCGTCACTCGTTG
CATTGAAGAAGTTGAATTGCGTGGAATGGACATTGAGGGTATCTATCGGAAGACTGGAGG
TACTGGGCAAGTCAACATTATCAAAGAAGGATTTGATAAGAGTGAAGACTATGACATTTC
AGATCCTGACCTCGATATCACCGCGGTTACAAGTGTTCTAAAACAATATTTCCGAAAGCT
TCCTGTACCACTTCTGACCTTCGACGTTTATGATCGAGTATTAGAATCAATCTGTAAGTT
CAATTTCATATTCTGATAGAAATTACTTGCTAATACAACTATAGCCATCGAAGACAACGC
AGAACGCTGCACACATCTACGGAACACAGTCAACATGCTACCTCCCAAGCATCGTGATTG
CCTTGAGTTTTTGATTTTCCATCTTGTGCGTGTAGCAAAACGAGAAAGCGAGAACTTGGT
ATGTTCACTTGTATACATCAGTCTTCTGATATACTAATTATTCGTTACAGATGACACCTA
AGAATCTGGCAGTGGTTTTTGCACCGACCATCATGCGTGATCACAGCATAGACCGTGAGA
TGACGGATATGCATGCTAAGAACCAAGCTGTTCAGTTTGTCATTGAGAACAGTTACGACA
TATTTGCCGGCGCTTAAGAAACTTATTATCTTACCACGAATCTTCTATGACCTTACACTT
CTGAATGATAGGGACCTTTAGCCTTTTTTTATCTTATGTTTCGCCTTCAGCGTTGGATAC
GCAGAAAGCGTCGAGATGTATATTCTTTTTTGCACTCATGTTTAGCAAGGTGATGGGTGG
GGCGTTAGTTCTGGAAAGCGAATGAATGATAGACCGATTTTTTGATCGGTAACAGAGATG
ATTGAGAGAGAAATTTACATTTTTATGGCGTTTTTTCAAGTGCCTTACTTGCTTCCGTGT
TTTTTTTTTCTTTTTTTGATTGATGATTTTTTTGATTTGATATTTGAATGGCTGGAAATC
TACGTACTTGCTTGCTAGCTTTCGTTTCTCTTCTTCAAATCAAGCTAGTTGATAGGCCTT
GATATCTTGGATCATGTGTCTGAAGAATGCATATTGAGGATAGGGTAAGGGGTACGAGAA
GGGGGAATACGATTAGTAGGTATTATGCATCTCACATGACAAGACGTTGCAGGGAGGGAA
AGTTTTGGCATTGGTTTGAGGGTAGAGTTCGCCGTAGCTTACGCAGGAGGATATTGGATC
GAAAGCGTGATTTATTTATGGGTTGATGTTTATGCTGTGATGTGGTGCGGTACGGTGGTT
TTAATAGTCGTTATGCGTGCTTTGCATAGTGGATTTTGTATGTATGCATGCATGTATGTA
GGTTAGTTAACTCAGGGAATAGTCATTGTGCTGATGTTATATCATACCTCATATCTCACA
TCTTGAAGTGTGCAGTTTTGGATGGGTGCATGA
>8cb105c5-e219-4016-acab-1bc45e0fff81 (mRNA) 3896 residues [Bfab07:518297-522192 - strand] [genomic] name=Bfab07g01390.1
ATTCTTAATGCGAATATTGTGCGACGCTGCCATCTCGTCAATAACCGAATGCCATACTGT
GCATAACCTCCTTTGTTCCCAAAATCACTGACAGCACATCTCATCTACAGATAGGCACAT
ATCCTGATTTGATATCCACGGTTTCTTCAACTTCACCCCACCTCAATCATGGGTGAAAAG
ATCACCGAAGATCAAGTAGCAAACTTGCTGGCAATACTTCGAACAGATGCTTTGATAGAC
TCCAAGGTCAATCAGATCAACAACATCAAATCCAGTATCAAACAACACAACGTTCCAGAA
CCATGCATACTTTCACTATTCGAGGCCTTGCGCCTAGCAATGTCGTCGCAGCACGCCGCA
CTGGTCAACGCCGGATTCTCTACCCTCAATCATCTCCTCACCAGACTGTCACGCCAGGAA
CCAAAATACATTGTCAAGGAAGCTGCCCGGACTCTGCCAATGATAAATGATAAGATGGGC
GACCAGAGGGAGAAATATAGACAACTTGCTGCGCTATGTCTTACAACGTTCTGGAAAAAT
GCGCCGATGGATGTAGAAAGAATCGTGAAGAACGCAGGACTGGTAGGAAAGAACTCGAGG
ATGAAAGAAAATTCAATGAATTGGATTGTACAGGTAAACAGATACATTTTGGCGCCGGCT
TATTTACACTTTCTAACTATCGGATCAAATAGATGCACCAAGAGCATGGAATGCCATTCA
AAAGCTTTGTAACTACACTAATGGAGCTACTCGAAGATGCCGATGGCATGGTAAGAGATA
CCGCGAGAAATACTGTCATCACCTTATTCCAGTAAGTCTCTTCCTATCGGCCATATTACC
TTCATATTCTAATTGCCACAGAAATGCCCCCAATGGAGCCAAGTCCGATCTCAAGAAGCA
ATTGAAGAATTTCAATGTTCGACCAGCGATCGTATCAGCTATCACGAGTCAACTTATATC
AGGAGGAGCCCCAGTGGTTGTGGAACCGGAAAGAACTGAAGCCCCTATGCGCAATCCTTT
AGCTAGTAGTGCATCTGCGATGAACGTCTCAAGACCAGCAACACCAGAAGTCAAAATTGA
GCAAGTAGACCCTGCATATGTGAACACACAAAGAGAGTTGGAGGAAACTTTTCAAGAAAT
GCATCAATGGTTTCAAGACAAGGAGTCTGAAGCAAATTGGTTTAAGAGAGAACAAAGCTG
TACAAAGTTACGGAGATTGAACGCTGGAAACGCCCCAAGCGACTACCATGATGCTTTTCT
GGCTGGTATCAAAAGCCTTCTGGATGGTATCTTGAAAGCTGTTAATTCATTGAGAACTAG
TCTTTCAAAGGAAGGGTGTAGTGTCGTTCAAGAAATTGCTCGAACTGCTGGGCCTGGACT
GGATCCTATGGTCGAAATTCTTCTGCAAAACCTTATCAAACTCTGTGGTGGCACCAAAAA
AATCAGTTCGCAGAACGGAAATTTGACAGTTGATATTATTATCAGCGGCGTTACTTATAA
TCATCGGATCATGCAGCATATCTGGCTCGCATGCCAAGACAAGAATGTTCAGCCTAGAAC
TTATGCCACAGGCTGGCTCAAAACATTGCTTAAGAAGGAGGCGCAACACAAGAGTCACGT
TGAACATAGTGGAGGCTTAGAACTGATTGAAAAGTGTATAAAAAAAGGTCTAGCCGATGC
CAATCCTGGTGTTCGCGAGAACATGAGATCAACCTATTGGACTTTTGCTCAGATATGGCC
AGCAAGGGCTGAGTTGTAAGTGTATAAGCATTTCTACGCGGTCTGAATGATGACTAACGA
GTTTTAGAATAATCGAGGATCTAGAACCGACTCAGAGAAGACTACTAGAGAATTCTCCAG
ACAATCCCAATGCGCCAAAGAAGGCAGCGGCAGTCAGTTCGACAAGGCCTGGCCTTGGTT
TCTCCAAGAGCACTACTGGACCTCCTAGACCCTCCTTGAGGGAGACTATGTTAGCACAGA
AGAAGGCACAAATGGCCACCAAAACTATTCCTACTCGTCCTGGTTCTGCTATGTCAACAT
TTTCTCCAACAAGGACCGTGCCAACCAAACACTCGTCTTCAGAAGTAGCTCCCACAAGAC
CTCATTTAGATGCTACTGGATCTCGTGGCGGTCTTTCTGTTGCACCCATGCGACCAAGTA
AATCTAAGAGACCAGAACTTGCTGCTAGACCTGCAACAGCCGGACCATATTCTGTAAGAA
GAACTAATCAAGCCTCCAGCGAAGCAAATGCCAGCCCTTCATCCTCCACATCCGCAAGAC
CACCAAGATCCAAAACTCCTGTTGCTACCAGCTCTCCCCAAGCTAAAAGAGCTCCAATTC
CGAGACCCAACACAAGCCATTCTAGCCATCCCACGCAATCTCATCATCCAACCCAATCCA
CTTACACAAGTCCTGCAGCAAAAAGTGCATCTGGACGAGTTACGACTGCTTCTCCTAGAC
TTGCTGCTTCCCCTCACATTAGTAGTCCTGTTAGGACAAGAACTAAGTCGGTACCTGGAT
TGCCTGGACCTGGATCTAGTCCTTCAAGAGCAGATGAAGATTTTACGATGGTCGTTCCCA
CGATTACTGGGTTGGAACGGATACAATCTGATAAACTCCCTCAGGTCTTTGAACCATCTG
AGGTGAGAGATATCAAAGCTCCTGTCAATCAGCCAATGAAGGTTTATGAAGATCCATTCT
CAAGCACAGATGATACTACTACTCCAGGACCTGCAGTTCCTCAGTCCGTTTTAGAAGAAG
TGCCTGTGAACGAAGATGCTATAAACCTGTCAAGAAATAGCATCAGCGAATTTGATGGCG
AAGGAGCTATGAATCCGCCAATGTCACCGGACAAACTCAAACATAGCACAAAATTACTCG
ATAGCGGTATCTCCAAAATCAGAGCTAAATCTCTAGACGTCCACGGTTTCCGAAAACTTC
AAGCCATGATCAGAGATAACAAAGCTGTTTGGGGAGATGGCAGGTTCCCCGCCCTCTTGT
TAGGACTTTTTGAATATCTTGAAGAACCATTAACAAATCTCTCGCCCGCAAAAGTTCAGG
ATGTCAAAGCACAAATACTAGCTACAGTCAAACTCATGTACAAAAATTACCGAGAGTATT
TCAGACCACATATCGCAAAAGGCTTTCATTCTATTCTTGTAACTAGATCCTGCTATGATG
CACGCGCCCATATTGTTAGTGGCCTCGAACTTCTTGCCGATGAGCTTGTTACACTTGCCA
ATCCCAAAGAGACCATCATTACCATTCTCAACTCCCTCTCCAACGAAGAAATGACATTGG
AGGGATGCCGAAAATTTAGTATGGGATTACATATACTTAAGCAGACGTTAGATATCAAGT
CCGATGTTGAGTTGGAAGATGCGGAAATTGATAGCATCTTGGAATTGGCAGCAAAGTGTC
TTGAGAGCAAGGAGAGCGGAGTGAGACTGGATGCTGTGGTACTCTGTGTGAGTACGCATG
CAAGAATTGGAGAGGCAAGATTCTGGAGTGGAATTGGTGGAAGAGTGAGTGGCGATCCAA
AGAGCTTGATCACGTACTACATTGTCAAGAGGCAGAGGGAGCTGGAGGTAGAAAATTGAC
GGTGTGGAGAGGGACATGTAACGAAAGTCAGTGGCATAAGCTAATGTTTCGTTTGGACGA
ACGAAGGGAATGATAAGTAGGATCGTTGTACAATACGAAAGTCTTTTGTTTTGACTGGAT
ATTTTTGGGATATTTTCTGGGTGGTGTGGTGGATTCTACGGTGTGCAGCGAGGGAAAATG
GAAGGGTGATACAAGGCGTTGTGCAGTGCACGTTACATATCAACTTTCTGGTTATTGGCA
GAGGCGTAAGAGTTTGAGTCGTATTAATAGTACATCTATATGTTATAATATTGTCT
>b3a56976-855f-48f8-889e-e73cb7649aeb (mRNA) 2643 residues [Bfab07:522390-525032 + strand] [genomic] name=Bfab07g01400.1
ACATGAACATTCCGACTCCTCTCATTGGACATGTAAACACATGTGTTGACGACCTTGGAA
CCTATCATCTCAATATCTGTTCTCGTCCAGGAAGCAAAGAAAGCTCTCAACATATGCACA
AACATCCGTCCACAACAGACCTCCTTGCCGCATCTGAGTTCTCACCTTGAAAGAAGCTCA
CCCCTTTGCTACATCAACAAGGCCAAGCTAGGGAGCTGGGCACGACACGCATTACTCATT
CCGGTGCCGATATCACCAGTATTGACCCTTCACGATTGCAATTCTGCATAGGAAGATCAA
TGCAACAGGACCCTTGCAAGGAGTGACCTTGTCCTAAACCTTATCCTTTGAATCTTTGAA
CCCTACACATCACCTGCATAATGCCCACTTCCCCCGCAACCAGCCCGGTTCCTCCACCTG
TGTTCATGCCTCAATTCTCCAGCACCTCGCCGGCTCCAACTCCTGTACCGATGCCTCCTG
CGAAAGAAAAGTCGGCTTCAAAGCCTAGTAAAGATGATGGTTCCATTCCGGCGATCAAAT
TCCCTCTACCCAAGTTACGCCTCGAGTTACGGGATCTCAATCATGCAGGATCGCATACTT
TCTTGACCGCCGTTATAGCGGACGACGCTCTACAGACGGCAGTTCAAAGCGTTCTTACGC
TACTATATGAGTCCCCCACTTGTCCTACCACAACTCCGACTCCAACTCGATCGGTGACCC
TCATCCTCCGTTCCATGGAAGGTGTGGCATATACAACGGGTAGCGACCTTGACAATGACC
ATAAGGAGATACATTTATCCCTAGATTACATACAGCACGAATCAATTAAGCCGGACCGAA
AGAAGCATGAGATCATGGGTGTGTTGACTCATGAAATGGTACATTGCTGCCAGTACAATG
GATTCAATACTTGCCCTGGTGGCTTGGTTGAAGGAATTGCAGACTGGGTTCGATTGAACG
CCAATTTGAGTCCACCTCATTGGAAAAGAGAGGCCAGTGGGAAATGGGATGCAGGTTACC
AACACACCGGCTACTTTCTTGAATATCTGGAACAGAGATTCGGCAAAGGCACTGTAAGGA
GGGTGAACGAAAAATTGAGAGTTGAGCGATACGAAGAGAAACGATTTTGGACAGAGCTTT
GTGGAAGGCCGGTAGAACAACTCTGGAAAGATTATTCAAAGTATCTGCAGGAAGAGGAGA
GGAAAGCAGAAGAAGAAGAGTGTGTGGTTGTGGAAAAGGAAGATGCTATAACACCCAAAC
AGCCCAAGTGTGAAGGAGGTAAAGTGACGCTTGCCACAACAACAGAGGAAACGAAAGATA
ACCCCACAAACACTGAGAAGCTTGAGTGAATTTCAGAGACACTTTCTGAAACGATATATC
ACATTACGAATCTTAAAAACAGTCCTTCTCCGTCATTTCACCTGATGCATATGGCATGTT
TCACATCAACATTTATCTCAAGTTGTTCAAGATGAGCTTGTACAATTCGAAAGGTGGTTG
TCAATCAAGATTCCAGTTGCTCACAAGGTTCAATCATTGGCTAACATAAATTGTTATAGA
AGGACAGAATAGCATAGAGTGAGACTATTTATATTATGATTATACATTACATATTTTTAT
TACCTCCACATTCTCGCAATCTCCGACATACTACATCTTTCCCGTTTACTCCATCTCTGC
CCTGAATACATCATCCGCCCAGATGATTTTGATCTCAGTGGCTATGGGTAGGAAACAAGA
ACTAATAGTATGCTCCGAATTCAAATCTACGACCGAAGACATTCTGTAAATGGAATCTTT
GCCCGAGGTCCATTTCTGGAATCTCATAGTCTCCATTTTCCATATCATGTGCAAAATTTC
TAGTTTTGATAACCCTTTCAACAGCGAGTTCTGCATATTCCATAGCATTTGTATACTTTG
CTGCAGAGAAAAGTTTTTCGTTTCCCGCGGCCAAACCATCCCAAGATCTTATTTTAGCTC
CCATATTTTTCTTGATGCTTGAAAGTTGTTCGAAAAATGGCTCATCAATGGCTCATCACT
AGCTGGAAGCAATGATGTTACTTCCTGCAGTTTATCTCGGGCCGAGGAGGATGGTACGTT
ACTTGATGTTGGGGAAGCAAGGCCGATAAGGACTACGGAGGATCCAGAGGAAGAAAAGGG
TGTGGCTTCATACGCTCTTCTATGATTTCTATCTGACATTGGCGCGATGTGACATTTTTT
CTCACGGCAATGGGAACATACGACGTATTACATTTAAACTTGCGATTAGCATCGCTTAGT
TCTGTATTTCGGATTACCAATTGACGATACTCTTTCTCAAAGTCGACATAAACCTTTGGA
ATACTCTGCTCTGTCGATACTGGGGCCAAGAAGGTTGAGCATAGAGATCCGACCGATGGC
CCTGGGGTTCGTCTTGCAGCCATGTTTTCGACATTATGATCGATACTGAGGATGTGTGAG
GGTTCTGTTAGGGGCCTATGAGGGGCCTATGAGGATTTGAAGAGGAAGCCGAAGACATGG
TTATATTAGGTGCAGTAATTTTGGGCTGGTAGTAGTAGTATTCGTTCCTAGCAAGTTAGG
CAAATGCTCTAAATTGCCCAGTATACTTATCAGATCTACTTCTAAATTATATTCTCTAAA
GTA
>85f18bb9-f526-4512-bec2-622cfad1ac4a (mRNA) 1965 residues [Bfab07:526084-528048 + strand] [genomic] name=Bfab07g01410.1
CACAATTTAAGTCCGTGATGTTCGTTCATACCACACACCACACACCACACACCCACACTC
CGTACACACACACACACATACAACTTGGAGCACCCCAATTCTTATCCTGTGATAGGTGAA
GATCGCCCGATAACCCTGCAAGTAGTGGCGGTGTTTTGGGAATACGCAACCTCATAAGAG
GCAACCATCCATCATTTCAGTCACTCAATACCCAAAATTCCTGTTTCTCTCGCACCCTTC
CCTTCTCCATGAGAGATTTCCTTCAATCTGCTCACCAATACCTTTCCTTTCCCTTATTTC
ACAATCTTTCTTGAGGGAACATGCCTAATCATCCCGTTTTGGTTTCAGGTGCGGTAATCA
TAGCTGCTGTGGCTGTAGGCGTGAGTTTCCCCTCTTTTTACAGAATCCATGCAATGCACG
ACGAAGAAACTCAAAAACTAACAGAAACAATAGGCGGCGATAGCAGTATATGAATCACCG
CAAGCCCGTCAACTTGCTGAAGATGTTCGTCGTAGAATTGCAGTCGCATTACATTCCCTC
GGCGATGGAATTAATCCGAACAGTCGACAGCCTCGATTCAACCGACCTGAGGATGCAGAG
GGTTTTATGCAGAGTGCTTCGGAAGTAGGTGTCGATGCCGATGAGGATAGCAGGAGAAAA
CAGAGAGAAGAATTGATGTATTGGAATGCAGTGCGCATGGAAAGAATGGAAAAGGAGCAG
AAAATGGATGAGAAGAGACCCGCGGGAAACCCAACTCGAAAGCCGAGTTTTGAGGATTTC
TTACAAGAGGATCCCAGCGCTGAGAAAGGCACTTTTGTTTACAACACTGGCACGGATTTG
AATGGTCAAGCTGAAGAGGGTCTTACCCATCGACGAGGTGTCCGAGGTTTAAATCGATCG
ACAATCTACGCAAACCCATTTGCAGATGAGCATGGTATTGACAGCGAGGAACAACAAGCT
ATGGATAGAAGTTTAATGTCTCCTGAAGACGGCGAACAATACGAATCTGACTCTGAAGGA
TTATACAGTTGCCACGAAGGCCGAACTCGACCCCGCTCTCGACAAAGTACTTCCACTCTT
TCACCAGCAGAACCTATAGCCCACGAAGACGCCGAAACCCTTGTTGATCTTTCTGAACCA
TTCAACCCAGATCCACCAGTCTCTGTACCTACCCTTGAGAATTTGCAAACTGAGCCAACT
TACACAGCAAGAGCACAAGACAATGAAAATCCATTTGCATCCATCCACGCCTGGGCCGAT
CATACTGATAATGCAACCGGATTTTATTCCCCTCTCCCTGTTACGCCTCACGAACGTCCT
TCAACCCCAACTGCTACCCAGAGCGCTCAAGTTACTCCCCCTTCACCCACCATCTCCGAT
CCCGATTACTCTTCTCTTGAATCCCTCGATGGAGATGGAATGATCACTCCTACGGATTCT
GCATCATTAGCTGGTTCGGGTGAAGAAGTATGGCACCCAAGAAGCGGCGCTACCAGTGAC
GCCGACGTCATGAGTGTGGATGATGGTATCGTCACACCTGATAGCTGGTCGGAAATTGGA
AGCTTAGCAAGCGAAGATGAAGTACACCATTAATCATTCGTATCAACTCGATACATTACC
CACACGTATTGAGAAGTTACAACGTCCACCCACTTACAAAGCATGCGGTCTATAGCAAGC
GTAGGAGTTGCATTCGGCGTCGGATACATACTAGATGTCATATCAGACAAAAAGTCCATG
GGAACCATCACAATTAGCTAGCTGCAGGAACAGTAAATTTGGGGGCAACACAATTTGGGA
ATACAAGCACGGCGTCGGGATCAATGGGAAATAAGAAAGGGGTAAGGTTGGCGTACTTGT
AGTGGACATATCTAACTGTCTCTAAATTGATCGACTGACATACACATTTATTCTGAGATT
TACTGTTCTTCATTTTGATGAGGTAGGGTGTTTGAATTGGATATT
>a3fe132a-8a87-47d1-8867-f08327840081 (mRNA) 2584 residues [Bfab07:528363-530946 - strand] [genomic] name=Bfab07g01420.1
CCTTCAACATCGATTCGGCTATTCAAATAGAGCTAAAATGACAAGATGAAAACAGAAATT
CACATTCTCAGGTTTTATCCGCTTTATACATACCTATCTTGTCGTCGGGAGTCTCTCATG
AGGATGATTGATCATTTCCCTATCACTTGAACAGATTACTCTCCTCCTATTCTTTACCAC
AGTTCACAAATTACATCCCGGTGACCGTGCAAGCTATGACAGCATTCACATTTGTTCGGA
TACATCGGACGGAAAGACAACAAACAGAGGGGCAACATCCGCAACTATTGGGCAGAAGAC
AAACATTGATACTCGCCTTGTAAAATGAGTGAAAGTTATAGACCAGACAATGACGCTTTT
CCGGAGTCACCTTATGATATAGCATTTCTGGTGTGTTATGCTCTTCTGATTGGATCAATA
TGGACACTCTTACTAAACTGTCCCCTAGTCACAAAGAGATCTGGGCTTAAACATACCAAT
CAATTATGCTACGGCTCCTGGTGTTTCTTTGACGGCCGCATGTTTCTCATCTCTCAAGTA
TGAGGATGATGATGCGACTACTTGCATTTCCAATTTATTGGCCAATGGATTCCGGAGACT
GGAAGTAGATTTATATTGGGATGAAGCAAGGCAATTATGGAGTTTTTGCCCTGCTGCTGT
GCCAATTTCGAGTTCGGATGTTGCCTCTACACCAACTCCAACATCGACGCTTTCATCCAC
CACAGCCAGTTTAACTTTAGCCCAGCAAACTTCGGATTTGATTCCTAGGCAAAATGCAGC
CACGAGCCCTATCATTCCTTCACCAAGTACATTAGATGTTACATTTAATTCAAGACCTAC
TTCCCATAGTTCGTCTACAGTGAACGTAATAGCAAGCTCTCTCGAATCAACCCTTCCTGT
AGCCTCTGCAATCCCAAAGCTTTCGAACAAATCGCTGTATGATATTGGAAGCTACACTTG
TACTAACACTATCAACCTTGATATGCTAACAAGCCTTCTTTTGGATTGCATACAAGAAAC
ACAAAATAACATTGATGCATATATGTTGATATTGACTCTCAATATCCACGAAGCAAAATC
TGGTTTCGGCATTGATGACCCTGCTCCTCAGCCAACCGACCTTCCAGATCCTTCAGAATC
TCTAAAATTCCTTTTTGCGTCAAATTTTTCAGCATACATATATACACCAAATGATTTAAG
GATTGATCGAGCAAATTTAAACACATCTTGGTATCAAGTTGCAGCAAGATATCGACCTGA
TTTAGATTATTATACTACCGCCACGGAAGAATTTGGTATTATATCCACTAAAGATGGTTG
GCCATCAGAATCTTACATTGAGTTCTCTCAAGGCAAACGAATGCTTTTACAGTTTGGCTC
TGTGGACCCTCAAATGGAGAATTACAATTTCAGTGGAGACGCAGGGACTATCTTTCCTCC
AGGCTATCTTAGCAACCGCCGCGACGACGACACATTAGCCAGTGCTGATGGAGTAATAGA
AAGCGGTTGCTTCCTTGTTAATGCCACCGAAGACGTTTCTCAAGTAAACTCATCCTGGGC
AACAGCAGTAAACATAGCCGGATTCGATTATCCCACCGACTCGAATTCTAGCCTCACTTC
CCTCCTCAACCTAACATCCTCTCTCACAAACTGTGGTATATCCCCAAACCTCAACACAAC
CCTCCTCAATACCAGCGCCAATACCAACAACTTCCCCTACCAACACTACACCTACTCCAC
CATCTGGTCCTGGGCTCCCCACGAACCCCGCTCCTCCAACAGCAGCAACGACAACGACGA
CTCCCTCTTCCGCTGCGCCACTCTCCACCCCGCCACCACCCACTGGCACGTCACCGACTG
CTCCACCAAACTCTACGCCGCCTGTCGCGCCCCTTCGCAACCCTACAACTGGACCCTCAC
CACCTACCCCATCTCCTACTCCTACGCCTCACAAGCCTGTCCCACCCCCTACATATTCTC
CGCGCCACGCACCGCCCTCGAAAACGCCTACCTCTCCCAAACCGCCACAAACCTCTCTTC
CGCCCGCGACTTCGACTCCGACGATCCGAAAATCTGGCTCGATTTCAACTCGCTCGATAC
CAAAAATTGCTGGACCACCGGCGGTCCCAATATCACGTGTCCGTATAGCAATGAAGATAG
CGACGATTATGCGAGAGAGAAAGTCGTGGTTGTGCCGTTGGTAGCCACGACTATTGTTTT
GATCATTTTTTTCCTCGTGCTCTGCGTGAATTGCGGAAAGGGGTTTTTGGGGAGGAAGGG
CGAGGGGAAGAGGAGAAGGAGGGTTAGAGAGGGCGCGGTGTATGAGGGAGTGCCGGCTTG
ATTGAAGGTTGGTATGGAGGAGGGACTTATCTTTTATTATTATTTATGTTTCTCGCTTGT
ATTTTTTGGTGTTTTCATGCACATCTATACACAACTATCTACCTACCTACCCATTTTGTA
AAGAGTGTAATTATAAACGGCATAGGATATTGGTAGGGAGTTGGGAATTGGGAATTGGGT
CAATTTTTTTTGTAATACTTCAAACCATAATAACTAAGTAGATGATAATAAAATCGTTTT
GAAT
>7f0fadbe-c7ff-443b-bb8f-a8b8ccbc2b66 (mRNA) 2075 residues [Bfab07:531237-533311 + strand] [genomic] name=Bfab07g01430.1
ACAAATCTTTGTGGACTGATTCACTCGTTCACTCGTTCACTCACTTCAACCACTTTTTTT
AGCAGAAGTTCCCCTTACATTCACCACATACTGTATTCGACTTTACAATTTCCAATATGG
ATTCTCCAGACGCAGATCCCCAACAAGGGCCACCACCAGGACTAGGTCAAATTCAATTCA
GATTACCAGACGGTTCGCAACCAAGTCCCGAACAAATACAGATAATGCAGCAGCAAATCG
CTCAGCAGGCAAAACAACAAGGATTATCGATACCTGATTTCATAGCAAAGATGAATGCGC
AAAATCAAGCCCGATTACAAGCCCAAGGCCAGCAGCCATCTCCAGAACAAATCCAAGCCA
TGCAGAAGCAGCTAGCTCAAGACGCCGAAAAGGCAGGAATGCCTGTAGCTGAGTTTGTAG
CAAAGATTAGGGCGCAACAAGCTCAACAACAAGCTCTACAACAAGGCCAACAGCCATCTC
CAGAGCAAATTCAGGCCATGCAGAAGCAGCTAGCTCAAGATGCTGAAAAGGCGGGAATGC
CTGTAGCTGAGTTTGTAGCAAAAATTAAGGCTCAACAAGCTCAACAACAAGCTCTACAAC
AAGGCCAACAGCCATCTCCAGAACAAATTCAGGCGATGAAAGAGAAATTGGCTCAGGATG
CAGCAAAAGCTGGTATGTCTGTACCCGACTTTGTGGAAAAGATAAAGGCGGATGCGATGG
CCCAACAGCAGCAACAAAGAGAAGCTGCAATGCAACAGCAGCAGCAGCAACAAACTCAGC
CAATTAACCCCGGCCCTCCGAATCCAGCTGCTGTTGCTCTCGCAAACTTCTTGATGGGTC
AGGACTTGAAAGCAAGAACATGTATCTTGAATGGTCAAAGAAAGGACATGTTTAAAGGTA
AGAATTTTCACTATTCTATTGCAACCAGTTTCTAACATGCAACCACAGTGAAACGTGCTC
TACGAGCCATTCAATCACCAGCTTATGAAAAAGCTCGCAAGAAGAACCCACTTCTCCCCG
AAATTACTGATCGCGCTTCACTCGAAAATTGCTTCAAACTTCTCCCACTTTCTCTCCTTG
CACTCCGTGTTTCTAAAGTCGACCCTCATGAAGGTCATGATCATGCCCCTGGTGCTCACA
ATACAAAGCGGGTGAAAGGACTTTGGACTGTCAAAATTGAACCGCAGCAAGAATGCAAGG
AAGAGCTCCATTTCGTATGGCTTTATGAAGGTACACAAATCAAACAGAAATTGTACGCTG
CTGGAGCATTAGCGATTGTATTTGCAATTGTCATGTTCCCACTTTGGCCAATGAAGATGA
GATTGGGCGTATGGTATCTAAGTATGGGTATGCTTGGATTGTTAGGATTATTCTTTGCGA
TGGCAATTTTCAGATTAATTCTGTTTGGTATTACAATGTTTGCAGTACCTCCTGGATTAT
GGTTATACCCAAATCTGTTTGAGGACGTTGGATTCTTCGATAGTTTTAGACCAGTCTGGG
GATGGCAAGAGGTAAGATTTTCTTCTCTTGAAATATCTTGTTATTGAGCAGGAAAAACTA
ACATGATTTATAGGAGAAAAAGAAAAGCAAGAAAAAGTCAAAGTCGAATGCCTCTGCCAG
CGCAAGCGCTATTGGAGCAGCAATGACAGGTCAACCAGCTCCAGCATCGGCAACCACGAC
AGGATCAACAGCACAAATTTCTACCGGAGAAACCACACAGCGAAACCTAGCACCAAGAGT
CGAAGAGGTGTTTGATGAAGAGTAATTACGCGGTAAATGACTTTACTGCGTGATATGATA
CCTGGAAGGCGATTTATGGATGGGCTGATGGATCGATTTATGGACGATCGGAAAATCACT
GGTGTACAATAGCGTTATGTGGATATCGGGAAGGAAATAATATTCTCTTATCTTGATTAG
AGATTTTTGATTCTACTTGCATCTATTTATTTATCTTGAGTAAAATCGTACCACTTAAAC
TTACATTTGACAAGTGGTTATCGATGATCATGATTTAATTCTGACAGCAAATACCAGGTG
CAGCAGGCTTCCCATACAAGACATAGTGTCTCGGC
>3e9044ce-8f1b-478d-9dda-c00c4df3921f (mRNA) 1439 residues [Bfab07:533399-534837 - strand] [genomic] name=Bfab07g01440.1
ATCATAATTTTAGTGAGCTCGGTTAGATTTTCCGGACCCTCAATTTATACTAGACGGAGT
AGGGGGTGATGTTTTCTTCGGGTTATTTGCACAGATAAATAAAATATAATCCCCATCCCA
TCTCTCAAACCTCCTCACCTCCACCTTTGATCCTCCACACCCCTACACTCCACAGCATCG
GCGAATTCCCCGCAAAATGAAACGAACAACCCGCAAAGCCCTCGTGCATCTCACGCTTTT
CTGCAGCGCCCTCTTCCTCATCATCTTCCTCAACCGCTCTTCCAGCAATACCTCTTTCCC
CTGGACCCGCATCCGCTACACCCATGATGCACAATCCCGGATCCCCGTCCCCCCTGCACA
CGGCATCTGTCCCGGGCTCTCCACCACCACCAAACCGGTTCTCGTCGTCTCCCGCGTCGA
AGCCGACGGCGATTCCAGCTGGCTGGATTCGCTCAGCCACAAATACCACATCTGCCTCTA
CAATATCGATTCCTCTGCTCTCCTGAAATCCTCTCAGAAAGTGCTCCAAGTGCCCGCTAA
CAGAGCGCATGAAGCCATGCCCTATCTCACATTCCTCATCGATAACTATGCAAATATCCC
CGCGACTGGCGCGGTATTCGTCCATGGAAATCGCTATCAGTGGCATAATGATCATCCGCA
ATACGACAATCTTGATCTGTTATCTCGGCTTGATCTCGAGAGTGCGTTAGCGGAAGACGG
ATACCATAATCTCAAATGTGATTGGAGTCTCAGCACGTGTAGCGATAAAGCAGTCGCCCA
GGGAAGTCTCGAGACGAGTATGCAAGCATCCCTGCAACCGTGGGACAAAAGAGCAGTTTC
TGATGCGGCGATGCCGAAGGCGTTAAGGGTGTTATTCGGAGAGGGCAAACAATTGAGCAG
AACGGATGTTGTGAAAAGTCAATGTTGTGCACAATTTGTCGTTTCGAGGAAAAGTATTTG
GAAACATGATAGAGAGGAATATGTGGCGCTCAGACAGTGGCTGTTGAACCCTGATGGCGC
ACCTAAGGATGATAAGGTAGCGGGCAGAATATTGAGTTATTTGTGGCACGTTTTGTTTTT
GGAACAAGACGGTGGCGAGGTTGAGGGAATGGTAGATTTGGATAGACTTAATAGACAGGC
TTGTCCGAGTGCACAAAAGTGCTATTGCCGACTCTACGGGAAGTGCGATCTAGATTGTAG
GACAACGGGGACTTGTCGAGGACAGTATGTATTGCCGAAAAATCTCAGGCTTCCGGAGGA
CTATGGAAGACAGTTTGAGCATTTGGATGATCACTCGGATAGTCTTTGAAGTCTGAGAGT
TGAAGCTTTTGCATTTTGGATGGAGTTGAAGATTAGACATTCGCATCTTGATGGAAAATT
AATCATAGAAAATACATAGAAACAGTACATTTGTTATTTAGAATAATGCATTGCACATT
>9d06e8a6-ae77-4828-81c9-1333756c6eb4 (mRNA) 3004 residues [Bfab07:535932-538935 - strand] [genomic] name=Bfab07g01450.1
TAATTTATTCCCAAAGTCAAACTGTTTGTGCAGACAGCCATGAATTTATGATCGCAAATC
AATAAGTTTACTGAAAACAAATTGATACGAAGAAGTAGGGATCCTCCTTTCAACAGCATA
CTGCAACAAAAAGAATCACACGTTCAAGATGTTGTTTCCAGAAGAAGATGCAGGAGAATT
GAAGAAATGGATTATAAAGAGACTGGAAAATACGTATGTTCAGCTTCAATTTGCGTCAAC
CTATAGATATGATATTAATTTTCTTTGTAGATCAGATGCAGATGCTGATGTTCTTGCCGA
TTATGTTCTTGCTTTATTGCGACATGATGGAGACATCAATACAGTTCGACAACTTTGCAT
GGCTGAAATTCCCGATTTCTTGAAAGAGGATACATCAATTTTCGTCCGAGATGTCTTCGA
TGCCCTCCAATATAAGACATATTTGAGTGGTGGACCTCCTCGTCGCAATTCGCAACAATT
CGCGCCACCTACCGGTCCATCAGCTCCAGCCTTCAATAACCCAAATATGGGACCTTCGAT
GGGCCATCAAAACGGTTCCCGAAAGCGCGCATTTGACGGACGAGGTGATGGAGACTCTCA
AATGTATATGGGGGGCGGAGACCAGAATTCGCGCGCATTTAAACAACCTCGAAGAGGTGG
CGCGGCAGGACGTGGAGCTTTCGACAATTTCAATAATGGCAGAGGAGGATTTCAAGGTCG
TCCACAACATATGCAAATGCCGAACGCGCAATTCATGTCTAACATGCCTAATATGCCAGG
TTCTCCAACGGGCTTACCTCTCGATCCAAACAATCCAATGGCAGCTATTCTTGCTATGCA
GCAGGCTATGGGTGCGATGGGTATGCCTCTTCCACAAGGTATGCCAGGATTTCCTCCTAA
CGGAGCCAATCAAAATAGAGGACACCCAGGTCCAACGGGCCAGAGGAAACAAAGATGTCG
GGATTACGACCAAAAGGGATTTTGCGCGAGAGGAAATACTTGTATGTTCGAGCATGGTCA
AGATTCGATATATGTTCCTGGAGGCGCTGGCAAACCTACAGACGAGTACGATCCAAGCAA
TGCGTCGCTTATGACCGGAAGTCAGAACCAGAATGATAACAACCAAAGACCGCCACCATA
TAACGGCTTTGAAAACAACCGTGGTGGTATGGGACGTGGCAGAGGGCAGTCTATGGGCAG
AGGTGGATCGCAAATGCATTCTAACAGAGGTGCGAGACGATCGGAGTTCTCATCAGATCG
AGCAAACTTCAATAAGAACAACACTACAATCGTAGTAGAACAAATTCCAGAAGACAAGTT
CTCAGAGGAAACCGTTCGAGAATTTTTCTCTCAATTCGGTACCATCAAGGAGGTAGAAAT
GAAACCATACAAACGACTGGCATTGATCACATTTGATGACTGGAATGGGGCGAATTCAGC
ATACAGCTCACCTAAGGTCATTTTTGACAATAGATTTGTAAAGGTCTATTGGTTCACAAA
TAATGAAGCGCTTCCAAAACCTCCTGCTAATGGACTATTCAATGGCGCAAATAACAACGG
TGCATCTGGCCCAGTCCCTGCAAGAGAGACGGATGAACCTCAAATTGATATCGAGGAATT
CGCGAAAAAGCAGCAAGAAGTACAGAAAGCCCACGAGGAAAAAATGAAGAAAAAACAGGA
AATGGAAGCCACTCGTAAGGAGCTGGAGAGACGCCAAGAAGAGCTTCTGAAAAATCAAGC
TGAGGAAAAGAGAAAGTTGATGGAAAGACTTGCAGCCAAGTCTGGTAAATCTGTATCCCC
AGGTCTTAATACAGAGGGTGGTTCTCCCGCACCTGCACCTTCATCTCAAACAGAAGCCTT
GAAGAAACAACTTGCTGCTTTAGAGGCGGAAGCTCAATCTTTAGGGTTACCAAGTCTGGA
TAGCCCTCTTTCTGATGATACATGGGGTGGACGAGGTCGTGGACGTGGTGGCTATAGAGG
AAGAGGTACTTTTGCTCCACGTGGATTTCGAGGTGGCTTTAGAGGACGTGGCGGTGCTGC
TTTTGGTGGTGGTGCTCCGGCCCGCTATAATCTTGACAATCGAACGAAGAAAATTGCCGT
TAGTGGTGCCGACTTTACAAATCCTCAGATAGATGAGAGTTTGAGAGAGCATCTTTTGGT
ATGACTTCCTTCCCCTCCCCTCAGAATTTCCGTCGAAACACTACGTGTACTAACAAAATC
TTAGGGTATTGGTGAATATACTGAACTCACAAATACGCCAAGCGGTTGTCAAATCACTTT
CAAAGATCGTCACATAGCTGAAAAATTCATGTATGGGCTTCAGAACGGCGAAATTCCATC
AGTAGGGAAGGTTGAACTATCATGGATTCAAACGCCCCTACCACCAGTTACATTGCCAAA
CACTCAGAGCTCAACCGGAGGTGGTAACACAGAATCAGATTCCAAGATGGAAGGTGCAAT
GGAAGGTGATGCCATGGCACAAGATTCTAATGCAATGGGTATGAGTGGACATGGTGGTGA
GAGAGAGATGCAAGAAAACATCGATTATGATGTTGCGGGTGATGACGATTGGCAGTAGAT
TGAAGGATAAGATGATTAGGGTGAAAATAGGAAAGCGGGTAGGCGGACGAAAAAACATAT
TCAATAAACATAGGATTGAATGATTGTATAACGAAGAGCATACATCTTGTACGAATTTGG
CACTTTTGTAATAATAACCAGAGAGCGAGAGGTGGAGCAAAAGATACCTGGGTGGGTGGG
CAGGAAATGCACATAACAGATGCCTTTATCAGGGAGATAGTATCTGACTTCAGTTGTATG
AAATTAAGCATACAGAAGCGACTTGTTGAGAGCTATGCATACGTAATCAGAAATACCATG
AATATGGATATCACATGAGCAAGCTATAATAAAGTGTACTCCAAAGTATCGAGTGCCCTT
GCATTGTCATTCAAAGATGAGGAAATTTCTCAATTTGTTTTTGATTGATGTATTATAAAG
CGTC
>f923ad31-218f-45d7-8772-94dff23c1e84 (mRNA) 3595 residues [Bfab07:539239-542833 - strand] [genomic] name=Bfab07g01460.1
CAGGCCTGCAATGTTCAGGTCCCCCATTATGGCGCAGATGCGCAGGACCAACGCACACCT
CGGGAGATCCAAGTGGATCGATCTAGTGTCCAGATCTCAAGTAAGTGGTATCGTGGAATA
CAGTATGAAGTTCCTGATCATTCTTAAAGGAAGTCACAAGTGCCGTGTTTCGTTCTTGCT
GTACTCTACTCACCGACCATTCCTTACTTTTCTCAACACTTGACTTAGTTGTGCTGTTCT
AGCGAAAAATCATTTTGATATTACTCGGTCATTTTTAGATCCCTCTCGTTGCTTTCACAC
TTCTCTATGATTCACACAGCACTATTATAAAATGCTTTATTCATTCATGTAAAGACTCGC
TCTTTCGCATCAGACGCTCTTTACGTTTGGTACCACTCCTCAAGGGAAGCAGAGGATGTG
TACGTATCTCTGAATTCATCACTGCTAATATGCATGATCATATATAACAGTCCAACTATC
TCACTATTTCCTGGTCGGTTGGGAACTCCACGATCATGAGATTGAAGCCGACTTCTAACG
CCGTTCGATTTTATTTGACACCTTTCTAATGTATCTTTACACTGCCCTGTTTGGGCTCAT
GACGGGAGTGGTAGCTCAATCTACCGTAGATTATTCACAATATGTTCTCACATCAGTAAG
TTTATACGATACCTAATACCAGAGTTTTAACTAATGTGTTTTCTAGAATGGCGAGGCCAG
TGGAGGTAATACTTTCCCTGGAGTTTCTTTACCTTTTGGGATGGTCAAGCTTGGGCCTGA
CATGTTCACGGGAAGTGATAGCTATTCTGGAGCTGCATTACGTGGCAACTTTACCGGATT
TTCCATGATGCACGAGAGCGGAACTGGAGGATCACCGAAATATGGTGTTGTCTCACAGAT
GCCGATACTTGGGAATATAACTAACCCGCTGGTTAACCTGAATGATACTCGAGCCTCTGC
CGATATCACATCGGTAGGATACTACAAAGCCTCGCTAGGAAGTAACATCACTGTCGAATT
GGGAGCAACAAGTCGTGCGGGCTTTTATCAGTACACATTCCCAGAGGGAAGAGGTACCCC
AAAAGTAGTTGTTGATGTGTCTCATGTATTACCATCCTACCGAAAACAAGGCCTTTCTCA
AAATTACCTTGGCGGAAATATTACCGTACTAGAGGATGGACATTATGAAGGATCTGGTGA
TTATAACAATGGATGGAATATGGCACCTGACTGGAGAATATACTTTTGTGGCTACTTCGA
AAGTCCCGCAACGACAAAGACATTTACCGGAACGAGCCTCAATGGAAGCGTAGTTGCAAG
TTATGGTACGGAGAGATCGGCTTCTTCCAAAACTCGACTGGGAGCCATATTCAGCTTCAA
TACTACAACGGTAATCTCCAGAGTAGGAATATCTTTTATATCATCAGCCCAGGCCTGTGA
AAACGTCAATTCACAAATACCTTCTGGTACAACGCTCTCCGCCTTGACCAATGATGCGAA
AAATGTCTGGAATACCGAGGTTTTATCCAAAGTCACGACTACCGAGACCAACAAAACCAA
TTTGCAGTTGTTATATAGTTCCCTATATTTCATGCACCTACTACCATCCAATCGGACTGG
GGAAAACCCACTCTGGATTTCATCAGAGCCGTACTATGATGATACCTTTACGACTTGGGA
TCTATTTCGGTGTACTTTTTCGTTACTTCATATACTTCAACCGGTAGCATATGAGGAGTA
TATCCGGTCATTGATTGATATATTTCGATTTGAGGGTTATATGCCAGATGCCAGGTCCTC
AAATTTTAATGGCGCAATACAAGGGGGGACTAACTCTGATAATGTGCTAGCTGATGCCTA
TGTAAAGGGAGTAAGAGGGGCAGTGAATTGGACCACCGGTTATCAAGCTATGGTCAAAGA
TGCTGAAGTTACCCCAGCTAATAATAACGATCCTCGAGACAATTCATCTTCGACAAAAGA
AGGTCGTGGAGCACTTCCCGATTGGTTACAGCATGGGTATATTACACCAAAATATGGCCG
ATCTGTGTCTCGAGCTGTCGAGTATTCTTTTAACGACTTTTCCCTTTATCAAGTAGCGAC
TGGGTTAGGAATAAAAGACGACGCAATGAAGTATTTGAAGAGGTCCCGTTATTGGGTAAA
CCACTGGAACCCAAATGCTACTTCTCTAGGGTTTAATGGATTTCTTGTTCCTAGAAGTGC
TTTAGGATTTATCAAGCAGGACCCACTCTCATGTGGTGGATGTTATTGGGGAGATGCTTA
CTATGAAGCACTGCCTTGGGAATATTCCTTCAACATGCATCATGACATGAACACACTGAT
CGCATTATCAGGTGGACCATCAACATTCGTCAATCGTCTTGGCACCATGTTTAAACCTGG
AATCAACACCTCTGGGCGCTCCTCAGCATTCAACAACACGATTTTCAACCCAGGCAACGA
GCCATCATTCACCACACCTTACTTGTATAATTACGTGGGAAGACAGGATTTGAGTGTGAT
GCAATCTCGATACATTGCAAAGTCATATTATTCACCTACACCTGGTGGGTTACCGGGGAA
TAGCGATGCTGGCGCAATGGAATCATGGTTAATTTGGAATATGCTTGGTTTATACCCTAT
GGTAGGGCAAACCACCTTCTTAATTGGCAGCCCATGGTTTGCCAACACAACTATTCAACT
TGGTGGCGGAAAAACACTTGCTATGACCACTGTTAACGGATCCGAGTCTTCCTTCTATGT
CCAATCTCTCAAAGTTAATGGGAAACCATGGAATCAATCATGGTTTACCTGGAACGATGT
CTTTGCGAATGGTGGAACAATGGATTTTGTTCTTGGATCTCAACCCTCCAATTGGACAAC
GGGGCCAGCACCACCAAGTCCAGCGAGCATGGTCAGCGATACTGCCGATCCCAACAGTAT
TCTGACGCCGGTGCCCACAGCTCCCGATCCTAAGTCCCATAATGGCTTTGAGAGAGAGAG
GAAAAAAGCAATGATGAGAATGATTGCTTTTGTGATTTTAGCTGTAACTGTAGTAACAAT
TTCTTGCGCAGGAATTTGGCATTGGCGAAAAAGAAATGCTACAGCGAAAGTTGATATTGT
TGATCAAGAAAAAGGGCCTAAACAGGCAGATGTGTCTGCACGAGAAAATGAATCTAGTAG
CAAAGGCTACAAACAAAAGTCAATGAGATGGATTAGATGGATACCAAATGGTGCTCCAAA
GAAGGATTTGAATAGGTCAATCACTACAAAGAATGACGTTGGGAGTATCAGTGAAGATAC
TATGGTTGATATGAAAGACTCAGACAATCAAAGTCCTGGGAAAGCACCTATGATTAAAGT
GAAATGAGTGCATGAGACTTCATCTGAAGAAGCTCTTGAACCTTGGACGCCCTCTGGAAC
AAACAGAAGGATATTTGATGAGAGGAGCTAGACTATGAACGAATAACGAAAACGAAAGCT
GTACATATACTAGATGATTAGATGTAAATTTAAATAATAGAAAGACAATAGATTCGTATA
AGAATAGATTTGTACAAGAGCAAGTCCTTCATACTTCATGTTTTCTGTATGATGA
>1fc22b1a-4217-468d-bf3d-33bd7ffc3ac9 (mRNA) 2294 residues [Bfab07:544696-546989 + strand] [genomic] name=Bfab07g01470.1
CGGGGTGCCTTTTGCTTTCAATTTCGAAGAGGCTTTTTCGGGCGTCTCGATCTTTGACGG
TCTGGTACGACGTTCCCATTTATGCCTAGACACCCAATCATTAAGATGGAGTTATCACAT
TCTTCAAATCTCCTCGATACTTTCGCAATGATGCTCTCTTAGCTTTACACTTGGTTGTTT
CCTGCTTGTTTCCCTTTGGAAATATTCTCACTCTCGTTTTCTATTGTCTATTGTCTATTG
TCTATTGTCTTTTGTCTTTTGTCTTCTGTCGTTCTTTCTTTTACATTTAATCCAAATCGT
GTTCGGTATGAAGTCGTGGTCATGCAATCTCTGAGCAGGTTTCTCACTGATGCGCAAATG
GCATGGTTGACATCTTCCATCAATTGTTGTGCGGCGGGGGACGAAGTGGAGAGCTGTGGT
AAGCAAACAAATGACAACGTTCGAGTCTGAAAGCGTGAAATTCTAACGAAATATCAAGAA
CCAGAGAAATCAATGCGAATAATAAATGGACAGCCTCAATTAATATCCCCCCCATTGTCA
CAATCTCCAGAAAGGCCACCAACAGCATCTGCTTTTGAAAGACCAGATACTCGAGGAAAG
GAGCGAGCGAGAACTCGATCGAGGACGTCAAGTCGTGGAAGCAGCTTTACTTTGAAAAGA
AATGTATCATCTCGTGCTTCCAATCGAATGGTGATTAGTGCGCCATATAACTTCCAACAT
CATACGGAAACGAGTTATGTGAGAGAGCCCGAACGAGTCGTACTTCGAAAAGAACCGAGA
TTGCGACCGTTGGAATTGAGTATATACTTACCAGGAAATCGATTATCACCACTGCCTGAA
TTTGGACCTCACTTCAATGAAGACAAGACGAATCGTCCTTTGGTTCATATGAGAAGCGAG
TCAGCGTTGGAATTTAGGGTACCTAGAAAGCCAGTCCTATCGACAGTCATGGAAAGGAGA
TCAATGAACACTGAGGAGTTGTTGAATGCTTTGTCAAATGATCTGCCTCACGAACGTCCT
ACACGATTGAGAGCAAACACAGAACCACTTGCGTATGAGAGAGTCAAGTCCGCGTTACTA
GAGAATATGGAATTGGACAAAAAGTTAAAAGAACTTGATGATGCTATCGAGAGACGAAGT
ATTTATCTAGCCAGTCGACCGGTAAGTCATGCAAGCCGAGCCGAAAGCCGACAAGAAAGA
CGCGAGAGTATATACTCGGAGTTCACAGGTAGGTCTCTGATTACATCATTACATTCTAAT
GTGACAATTCTAACAAACTCAAAGAACCCATGCCAGCCATCACCGAGCTGCCACTCCACC
ATATCGATCATCGTCCTCAAACCGCACCCTCTCGTCCTCGTCGCATGAAGTCCCTAGACT
CTTCTCTGCACGCACCCAAGCTTCTCAAAGAGCGTCCATTACCTCCCCCTCTTCCATTAG
TTCTCCAAACACCTCAAATTACAAATCAAAGAAAATCTCTATCGCGGGTCTCTTCCTGGT
TATTCCCATCTGGTTCGGAACAACAACACTCCCGTCACATGTCCCTCGATTCCGTTACCA
ACACTCCCAAACCCGTAACATCTAGAGATGGCTTCTATCAATGCATCGAAGTCAAAGAAG
TTCATAATCCACACAGTGTTAGTAGTGTGAGCAGTATCAGGAGTGAAGTTGACGGCAATG
AAGATTACGAAGCGACGAGTTGGAGTGATAGTCCAAGTCTGGGATATGGGCCTAGATATG
CGCGTGGATTGGGGTATGAAGTGAGAATCGGTGCGGATAGTAAGGGGTTGCAGGTAGCGC
CACCAAGTAGAGATGGAGCGAGAACATTCGGTGGAAGTGAAAAGGGTGAGGAGGCAAGAT
GGAGTATGGCTTATGGATATGGAAAAGATAGTGTTGGAGTCGCAATTTGAGAAATCGAGA
GATTTCTTGAGTTGTATTGTATAAATATTAAATGGTTGGCGGGAAAGGAAAGGAGATTGG
GATATGGAGGTCTGGTTGCTCGGTGGTATACATGGATGGATGGATGGTACGGTCGGTCGG
TCTATTCGATCTGGATGATTCGGATACTGGTTCTTCTCAAAGTTTTTTGTAAGGGGGAAA
AAGGGTCAGGACACTTCCTTTATGATACCACCTATTGTTATTTTCGGCGTTGTGATTTTA
GATATACATATTCAAGATATAATAATGAGGATGCGGATTTATGTATACATAATATGGTCG
ATTTTAATTGATATTGTATTGTCTTTACTTGAGATATGATAGTTTAAGTATAGAGAGAGA
GGTGGGTAGTTTTC
>af6751c2-4cf0-4113-9470-67c6ff6a7def (mRNA) 4583 residues [Bfab07:549664-554246 - strand] [genomic] name=Bfab07g01480.1
CACATAAGAATTTCTATAAATCTTCACGAAGCTCACGAAACTCACGAACCTCTCCAGACT
CACTTATAGACAACACTTATCTAGTGAATGTACGAAGATCAAACAGAATGATCACATTCC
GATGATTTTAGTCTCATCTACTTTTTCTTTTTCCTACTTACTCTTGCACAATCCTCCCTA
GTGACAAATATTGCCCCTCCTGTGAATTTATCGGCTCGATCACCACAACCACAACCACTA
CCACTACAACCACTACAACCACATCATAACCATACACCCACACAGTACATACGACACACA
GCTTGATGCATGCGGCCGTGACGAATATTCAAGGTTATCTACCATAAAGGAGAACTATGG
CCTCAATGAATAACAACTTCTCTGGTAATTTCCCAACCCTCGCAAACGGAGAGTCCCTGC
ATTCACACCAAGGGAAACTCTCTGGAAGTTCAGACCTACGCCCAAGTTACCCTACCGATT
TTGATAAACCTGTTACTTACAATTTCTCTGTCGCACAAGGCCAAAACCCTCCAAGATCGA
GACCGAATCAAAATGAGAACAATCCTGGTATACCACTTTCGAACGGTCATGCCGCAAATG
CCCAAAATTGGAGTCCCGCGCAACTGCTAAATCCTCGAAGCATTAATCAAAACTCACGAC
CCTCGCCCAGTTCATCACCTCATCCCCAACCAAAATTTACACCGGCAGCACCTGCTCCCC
AGCCTCTATTTCAGTTCGACGCGCCCGGCGGATCGTATACGCCGTCACCTCCCGCGAACC
CGAATTATAACGTGAACTCGTACTCGAATGGGCAGAATGGCTTTGCACCATACGCGAACC
CAAGTGGGCAAATGCCAGGCATGGGAAGTTTCGTGGATCGAATGCATAATATTACAGATC
GCGACATGGTACCTCAAAAACGCCGAAGAGTAGAAGACTTGACCGGAGAGGGAAGCAGAG
CACAATTTAATGGAAGTTCTAGTGGAGGTGCATACGGACAATATGTGAAAAACAGGAGGG
TTGAAGGCTCGAAGGATGGCTGTACCAAACAAGTACTCGACTTATCTTTAGTGGATGACG
ATGATGTTGTAGTTGTCGGGAATGAACAGGATAGGGAAGTTTGCTACGGACGTATTGAAG
GATCTCAACTCAACGCTCATCGAGTACCAACCCCAAAACCTGGAGCCCAATCACTTATAC
CTGAAAACTGGCCGCAGATAAAGATTGTCTTGCGAAGGAAGGAAGGGGATAAGACAAATA
ATATTCACGCTCTCGATTGTACTCGCGAAATTATTGGCTGCGTCGATGTGAACACTGCAA
TTGGACTCGCTCCTATTCTCGACTCCCCCAAAATGGGTGTCAGAACAGCTGCCCGTATTC
TTACAAGAAGGAAGGCGCCTGATGATCAGCCCGTGGGTTCCCCATGCTCTGTTCGTTACA
ATCTGGATTTGAATCTTTACGGTCCAAAAAAGTACGCTCTTCAAATTGGTCGTCACCTCT
CTCACAAGCAATTGTGGTTACGAACCCCACTTTCTGTAGAAGCCGGCATTCCATTGCACA
ATCCCCATGCTATAGAAAAACCTTCAAGGGCCTTGCAGCCCACATCTAGTACATACTCGT
CTTACGCATCTCGTTCTCAAGCCCCTGTTCGGACAACGGAAGAAATTCGAAATGACGTTT
TGGGAGTTTTCGACTCATTGCCGAGATCTGAGAATTTACCAGAGATGGAGCCAAGTTCTT
TAATTACTACGGAGCTGCTCAAACATCAGAAACAGGGTCTATACTTCATGATGAATAGAG
AAAAGGAGCGAAATTATGAGATGAATGACAAATGCGATTTGTGGAAACTTAGACATGGGA
ACAATGGCCAGAAGATATACTATAATGTCATCACCGGTGACGAGGAACGCAAAAGTCCAC
CACAGGTACTTGGTGGAATTCTTGCCGATATGATGGGACTTGGCAAAACTCTCAGCATTC
TCTCCTTGGTAGCTACAACGCTGGATGATTCAAAAGAGTGGGCGAAGCAAAGACCATCAC
AATCCGATCAGAGAGAGCAGCCAGTTCTCAAATCAGGCAAGGCTGCCTCTCAGCCCAAGT
TCGAACCTGCAACTCTCGCTTTGAACTGCAAAACTACCCTTTTAGTTGCTCCGCTCAGTG
TCATTTCTAATTGGGAAGATCAGATCAGGGCACATATCAAATCCGATGCTTTGAAGTATT
ACATCTATCATGGCGCTAATCGCATCAAGGATGTTACGAAATTGTCAGAATATGATATGG
TCATTACTACATATGGTTCTGTGGCTAGCGAATGCAATAACCGGAACAAGAAGAAAGATG
GTAAATATCCTCTCGAGGAGATGAATTGGTTTCGAATTGTACTCGATGAAGCTCATATGA
TCCGGGAACAATCAACTTTGCAATTCAAGGCTATTTGTAGGCTTTCAGCACAGCGTCGAT
GGGCATGCACAGGTACACCAGTTCAGAATCGACTTGAGGACTTGGGTGCATTGATGAATT
TCCTTCGCGTCAAACCATTTAACGGAAGTGGGTTTGCCCAACATATACTATCCCCTTTCA
AAATTTGCGATCCTGAAATCATTCCCAAACTTCGATTGTTAGTTGACAGCATTACTCTTC
GTCGACTTAAAGACAAAATAGACCTTCCTAAGCGTCATGATCAGATTGCTAGGCTAGATT
TCAGTGATGAAGAGCGTATGGTTTATGATATCTTTGAGAAAAATGCAACAGATAGGCTTA
AAGTTATTACTTCTCAGGGAGAAAGCGCATTGGGAGGTAAAACCTTTCATCATATTTTGC
AATCAATATTGCGTCTTCGTCAAGTCTGCGCTCATGGCAAGGATTTGTTGAGTGCCGAGG
ACTTGAAAATCATGAACGGTCTAAGTAAGGACTCTGCTATCGATCTTGACAGTGAAGAAT
ACGAAGATCACGATGGAATGACGCCCAAGCAGGCTTATGAAATGTATAAGTTGATGAGAG
ATACGGGTACAGACAGTTGCTTGACATGCAATCGGAAGATTGGTCCTCAGGATGTTGCTG
ACTCTGATGGCGAATCTAAGGAAGAAGTGATTGGTTACATGACACCATGTTTCCACATCA
TTTGTGGCTTGTGTATTGGTGCTTACAAATCTCAATTGGAAGAGTTGGCTGTTGGTGGTT
CTTTAGTCGGATGTCCTACTTGCCACCAACAAATTTCCCCGTCCATGTTCTTTTCTCTCA
AACAAGAGGAAGTAGATAAGGAAGAAGAATCCCGATTGAAGACCAAGGAATCGGCAAAAG
CGGGCAAGGATTTGTCGAATTATGGTGGACCTCATACCAAGACAATAGCTCTTATTCATG
ATCTTCTAGCATCCAGAAAGGAATCACAAGCAAGACCGAACGAGCCACCAATCAAAAGCG
TTGTATTTTCTGGTTGGACAACTCACCTTGACCTTATTCAACTCGCTTTGCAGGAGAATA
ATATCCCTTACACACGTCTCGATGGTAAAATGACTCGTATCGCTCGCTCGACGGCCATGG
AAAATTTTCGCGAAGATCCATCAATCGTTGTTATTCTAGTTTCCATCGCTGCCGGTGGTC
TCGGCCTCAATCTCACTACAGCTAATAAGGTCTATGTTATGGAACCTCAATTCAATCCTG
CAGCGGAAGCTCAAGCCATTGATCGTGTACATCGATTGGGTCAAAAGAGAGAGGTACAGA
CAGTAAGATTTATTATGAATAAAAGTTTTGAGGAAAAAATGCTGCAAATTCAAGATAAAA
AACAAAAGCTGGCGAGCTTGAGTATGGATTCGCAGAAGGGAAGGTTAGATAAGAAGGAAG
CGTCGATTAGGAGATTGGAAGAATTGAAAGATTTGTTCAGGAAGTAGACGCAATGACAAT
GATGTTATTCTGGGGTTTGGACCTTGAAGTTTCGGTGTTATTGGCAGGTTGGAGGGGACC
CACGGAATGTTTCAAAATTAGATAAAGGAGGAGTCAATGGTACATTGGATCCTTAGGGAT
GGAGTTTGGGATCATGTTACATGCATGCATCATTTTTTCTGATTACGATCAGACGCTAGA
TTCCCACCTCTCATGTTTTTCTTTATAATTTTGTTGATATCTTTATGTTCTTTCTATGCG
GGCGCTTGTGTACAGGATGATTGGCAGGGGAATCAAATGCACTCTCATGACATGACTTCA
ATTTTGGGGGGCGGGTGGTTAACTTCTTTACTACTATACTTTTTAGAAATACATTTTTAG
AGGATTTTTACACAAGGTGTGAAAGGGAAGGGGTTCGGCGAATGCTGTATTGTATTGTAC
CATGTGCAGTACGTATTGATGGAGATGGAAGGAGAAACACCTGGCGAGAAGGGTGAATCA
GGAATTGAAGTTTTGAGATGCGGTATACATAGATACATAGATCATTGTCACCTTTTATGA
GATCATTGGTTTTTGTGTAGTGTGGTGTGGTGTGATGTCATGTGATAGGATACTGTGTGT
ATCCTATGAGAAGAGAAGAGAGGAAAATGAGAACTAATTGCAACCGCTGCTGATATGTGT
CCTTCTATCTATAATCTATGTAT
>d977eee1-c2c2-4145-9e79-847726b03ad2 (mRNA) 4591 residues [Bfab07:549656-554246 - strand] [genomic] name=Bfab07g01480.2
CACATAAGAATTTCTATAAATCTTCACGAAGCTCACGAAACTCACGAACCTCTCCAGACT
CACTTATAGACAACACTTATCTAGTGAATGTACGAAGATCAAACAGAATGATCACATTCC
GATGATTTTAGTCTCATCTACTTTTTCTTTTTCCTACTTACTCTTGCACAATCCTCCCTA
GTGACAAATATTGCCCCTCCTGTGAATTTATCGGCTCGATCACCACAACCACAACCACTA
CCACTACAACCACTACAACCACATCATAACCATACACCCACACAGTACATACGACACACA
GCTTGATGCATGCGGCCGTGACGAATATTCAAGGTTATCTACCATAAAGGAGAACTATGG
CCTCAATGAATAACAACTTCTCTGGTAATTTCCCAACCCTCGCAAACGGAGAGTCCCTGC
ATTCACACCAAGGGAAACTCTCTGGAAGTTCAGACCTACGCCCAAGTTACCCTACCGATT
TTGATAAACCTGTTACTTACAATTTCTCTGTCGCACAAGGCCAAAACCCTCCAAGATCGA
GACCGAATCAAAATGAGAACAATCCTGGTATACCACTTTCGAACGGTCATGCCGCAAATG
CCCAAAATTGGAGTCCCGCGCAACTGCTAAATCCTCGAAGCATTAATCAAAACTCACGAC
CCTCGCCCAGTTCATCACCTCATCCCCAACCAAAATTTACACCGGCAGCACCTGCTCCCC
AGCCTCTATTTCAGTTCGACGCGCCCGGCGGATCGTATACGCCGTCACCTCCCGCGAACC
CGAATTATAACGTGAACTCGTACTCGAATGGGCAGAATGGCTTTGCACCATACGCGAACC
CAAGTGGGCAAATGCCAGGCATGGGAAGTTTCGTGGATCGAATGCATAATATTACAGATC
GCGACATGGTACCTCAAAAACGCCGAAGAGTAGAAGACTTGACCGGAGAGGGAAGCAGAG
CACAATTTAATGGAAGTTCTAGTGGAGGTGCATACGGACAATATGTGAAAAACAGGAGGG
TTGAAGGCTCGAAGGATGGCTGTACCAAACAAGTACTCGACTTATCTTTAGTGGATGACG
ATGATGTTGTAGTTGTCGGGAATGAACAGGATAGGGAAGTTTGCTACGGACGTATTGAAG
GATCTCAACTCAACGCTCATCGAGTACCAACCCCAAAACCTGGAGCCCAATCACTTATAC
CTGAAAACTGGCCGCAGATAAAGATTGTCTTGCGAAGGAAGGAAGGGGATAAGACAAATA
ATATTCACGCTCTCGATTGTACTCGCGAAATTATTGGCTGCGTCGATGTGAACACTGCAA
TTGGACTCGCTCCTATTCTCGACTCCCCCAAAATGGGTGTCAGAACAGCTGCCCGTATTC
TTACAAGAAGGAAGGCGCCTGATGATCAGCCCGTGGGTTCCCCATGCTCTGTTCGTTACA
ATCTGGATTTGAATCTTTACGGTCCAAAAAAGTACGCTCTTCAAATTGGTCGTCACCTCT
CTCACAAGCAATTGTGGTTACGAACCCCACTTTCTGTAGAAGCCGGCATTCCATTGCACA
ATCCCCATGCTATAGAAAAACCTTCAAGGGCCTTGCAGCCCACATCTAGTACATACTCGT
CTTACGCATCTCGTTCTCAAGCCCCTGTTCGGACAACGGAAGAAATTCGAAATGACGTTT
TGGGAGTTTTCGACTCATTGCCGAGATCTGAGAATTTACCAGAGATGGAGCCAAGTTCTT
TAATTACTACGGAGCTGCTCAAACATCAGAAACAGGGTCTATACTTCATGATGAATAGAG
AAAAGGAGCGAAATTATGAGATGAATGACAAATGCGATTTGTGGAAACTTAGACATGGGA
ACAATGGCCAGAAGATATACTATAATGTCATCACCGGTGACGAGGAACGCAAAAGTCCAC
CACAGGTACTTGGTGGAATTCTTGCCGATATGATGGGACTTGGCAAAACTCTCAGCATTC
TCTCCTTGGTAGCTACAACGCTGGATGATTCAAAAGAGTGGGCGAAGCAAAGACCATCAC
AATCCGATCAGAGAGAGCAGCCAGTTCTCAAATCAGGCAAGGCTGCCTCTCAGCCCAAGT
TCGAACCTGCAACTCTCGCTTTGAACTGCAAAACTACCCTTTTAGTTGCTCCGCTCAGTG
TCATTTCTAATTGGGAAGATCAGATCAGGGCACATATCAAATCCGATGCTTTGAAGTATT
ACATCTATCATGGCGCTAATCGCATCAAGGATGTTACGAAATTGTCAGAATATGATATGG
TCATTACTACATATGGTTCTGTGGCTAGCGAATGCAATAACCGGAACAAGAAGAAAGATG
GTAAATATCCTCTCGAGGAGATGAATTGGTTTCGAATTGTACTCGATGAAGCTCATATGA
TCCGGGAACAATCAACTTTGCAATTCAAGGCTATTTGTAGGCTTTCAGCACAGCGTCGAT
GGGCATGCACAGGTACACCAGTTCAGAATCGACTTGAGGACTTGGGTGCATTGATGAATT
TCCTTCGCGTCAAACCATTTAACGGAAGTGGGTTTGCCCAACATATACTATCCCCTTTCA
AAATTTGCGATCCTGAAATCATTCCCAAACTTCGATTGTTAGTTGACAGCATTACTCTTC
GTCGACTTAAAGACAAAATAGACCTTCCTAAGCGTCATGATCAGATTGCTAGGCTAGATT
TCAGTGATGAAGAGCGTATGGTTTATGATATCTTTGAGAAAAATGCAACAGATAGGCTTA
AAGTTATTACTTCTCAGGGAGAAAGCGCATTGGGAGGTAAAACCTTTCATCATATTTTGC
AATCAATATTGCGTCTTCGTCAAGTCTGCGCTCATGGCAAGGATTTGTTGAGTGCCGAGG
ACTTGAAAATCATGAACGGTCTAAGTAAGGACTCTGCTATCGATCTTGACAGTGAAGAAT
ACGAAGATCACGATGGAATGACGCCCAAGCAGGCTTATGAAATGTATAAGTTGATGAGAG
ATACGGGTACAGACAGTTGCTTGACATGCAATCGGAAGATTGGTCCTCAGGATGTTGCTG
ACTCTGATGGCGAATCTAAGGAAGAAGTGATTGGTTACATGACACCATGTTTCCACATCA
TTTGTGGCTTGTGTATTGGTGCTTACAAATCTCAATTGGAAGAGTTGGCTGTTGGTGGTT
CTTTAGTCGGATGTCCTACTTGCCACCAACAAATTTCCCCGTCCATGTTCTTTTCTCTCA
AACAAGAGGAAGTAGATAAGGAAGAAGAATCCCGATTGAAGACCAAGGAATCGGCAAAAG
CGGGCAAGGATTTGTCGAATTATGGTGGACCTCATACCAAGACAATAGCTCTTATTCATG
ATCTTCTAGCATCCAGAAAGGAATCACAAGCAAGACCGAACGAGCCACCAATCAAAAGCG
TTGTATTTTCTGGTTGGACAACTCACCTTGACCTTATTCAACTCGCTTTGCAGGAGAATA
ATATCCCTTACACACGTCTCGATGGTAAAATGACTCGTATCGCTCGCTCGACGGCCATGG
AAAATTTTCGCGAAGATCCATCAATCGTTGTTATTCTAGTTTCCATCGCTGCCGGTGGTC
TCGGCCTCAATCTCACTACAGCTAATAAGGTCTATGTTATGGAACCTCAATTCAATCCTG
CAGCGGAAGCTCAAGCCATTGATCGTGTACATCGATTGGGTCAAAAGAGAGAGGTACAGA
CAGTAAGATTTATTATGAATAAAAGTTTTGAGGAAAAAATGCTGCAAATTCAAGATAAAA
AACAAAAGCTGGCGAGCTTGAGTATGGATTCGCAGAAGGGAAGGTTAGATAAGAAGGAAG
CGTCGATTAGGAGATTGGAAGAATTGAAAGATTTGTTCAGGAAGTAGACGCAATGACAAT
GATGTTATTCTGGGGTTTGGACCTTGAAGTTTCGGTGTTATTGGCAGGTTGGAGGGGACC
CACGGAATGTTTCAAAATTAGATAAAGGAGGAGTCAATGGTACATTGGATCCTTAGGGAT
GGAGTTTGGGATCATGTTACATGCATGCATCATTTTTTCTGATTACGATCAGACGCTAGA
TTCCCACCTCTCATGTTTTTCTTTATAATTTTGTTGATATCTTTATGTTCTTTCTATGCG
GGCGCTTGTGTACAGGATGATTGGCAGGGGAATCAAATGCACTCTCATGACATGACTTCA
ATTTTGGGGGGCGGGTGGTTAACTTCTTTACTACTATACTTTTTAGAAATACATTTTTAG
AGGATTTTTACACAAGGTGTGAAAGGGAAGGGGTTCGGCGAATGCTGTATTGTATTGTAC
CATGTGCAGTACGTATTGATGGAGATGGAAGGAGAAACACCTGGCGAGAAGGGTGAATCA
GGAATTGAAGTTTTGAGATGCGGTATACATAGATACATAGATCATTGTCACCTTTTATGA
GATCATTGGTTTTTGTGTAGTGTGGTGTGGTGTGATGTCATGTGATAGGATACTGTGTGT
ATCCTATGAGAAGAGAAGAGAGGAAAATGAGAACTAATTGCAACCGCTGCTGATATGTGT
CCTTCTATCTATAATCTATGTATTTGTCGTC
>9f581a42-e3cc-40d2-b225-9cc23d7d3321 (mRNA) 1254 residues [Bfab07:555966-557219 - strand] [genomic] name=Bfab07g01491.1
TATTGCCACTTTCTGAGCGCAATATCTTGTCCATGAAGAGGATTAATAGTTAGCACGCGA
TGGCAGACAATAAGAGCAGAATTCCCTCGTTACGACTACAGCCTCTGTCAGTCGATTTTA
TTGATAATCGACTGTCTCAGTATCGTCCAGCTTTTGGCCATCCACCTTCCCATTTCGATC
CAGTCAGCGGCAATTTCTATGCCGATAAAGTTTACACCCAAACCATATCAAGATCCGGCA
ATCTTAGCCTTCCAATGCGCACTCAATCGAGAAATGTTGGAAATACAGAGCCTCAGCGTA
GTGGATCACATCAAGCTTTGTTTCCAGAAATGATGACGAATTTTATAAAAAAATACGACA
AAGAACCAAAGGGGAGATGCAACACAGAATACACTATTCGAAGCCAAACAGATTGGGATG
GGGTACTGCAAATACTTATTGCAGCTCAAGCTACCAGAGGTGATGCTCGATTCGGAGTCA
CAAGAAAATTAAAGGAATTAAAGGAGAAACTAAATGCCCACGCTACTAAAGTCAAGAAAC
TTGTCCCTTTAATCCCAAGCAATACTTATACATCGCCCGTGATCATTGTGTTGAACGTGA
TATTTGATGTGAGTTCTACTTCCGCCAATAGTCTTGGGAACACATTCACAGTGATTGTTT
TAGGCTATGAAAGCGTCCAACACTGTTCGAGAAGAGCTCTTGAAATCAATGGACAGTTTT
CGTGACTCTTTTGAGGTTATTGGGACCTATTTTTCAATTTATCATGGATTTCCGGAAGTA
TCAAAGGCAGCTATATCCTTGGGAGTTGCCATCTTGAAAGCAATTGAAGAGGTGATTGGT
TACTATCTTCAACACGCAGGTAGAGCCACTGAGTTTCCTATTCTCGTCCCCCCTCATTCA
TTGTGAATGAGTGACTAATGTGACAAGTTACACAGTATTTAAAGCATCGGAGGCGCTTTG
GGATGGTGAAGATTACAAAAAATCAATCACAACGAGTCTCGAAGATACTACTATGCATGG
GAAGCGTCTTCATCTTGAAGCCCAGAGGGCCAATTTCAGGGAAAATCACGAGACACACAC
TGGTGTGATTGATGCAAATAATGGTATCCAACAAGGTACAGCCCTTCTAATGAAACTTTA
TAGATCAAACTTAACTTTCCGTTCTGACCTGAAACATTCGAGTTCACACTGAACTCTCCG
AATTACATGCAAGATTGAATGAAATGTTCCTAGACTATGAATATCTAAAACGAA
>e2b0ba5d-a107-4b7d-9fe0-cec755aad5c3 (mRNA) 2652 residues [Bfab07:559660-562311 - strand] [genomic] name=Bfab07g01510.1
TGTAACATACCTAGTTCCACCGCTCCTGGAAATGCCTCATAACCATAAATAATTCTACTT
CATGGCGACTCCAATCCTAATCACATATCATACTTAATATGCCAAGATTTCGTCCAGCTA
CTACGGGTTATGCCCAAATTGCCCAAGCCGAAGAGTTCAGCGATGACGAAGAGGAGGACC
CCCTCGCTGCCAGCCATGCTTCCTTACAGCCAGCAGGCGCACCACGATATGCTTCTATTT
CACAGCCTCGACCGCATGGTGGAATGTATACCGATGGATACAGCTCACCGACAAATAATC
GAAAGTTTGGGCACACGAGAAGGCGAAGTCGTATGGGAAGCAATGCCTCCGGTGTGGACA
TCAAAGCTATAAATGCTAGATTGGAACGATGGGCAGACGAGATAGCGTCCAAGTTTAAAA
TCAATAAGGTAAAAGGGAAATCACATCAGGAGGAAAAACTGGAAATCCAGCACTCAGTAT
TTCAAGCACCGGAAGGCATGCGACCCCTCACTGCCGATACTTTGGCATCAGAACCCGATC
ATGGACGAATGACGAAATCCGAATTTGACGACGTTGTTGAAAGTGTTCGAGTTGCGATCG
AGCAGGGGATGCATCCAAAAATGATATCTCAGGGTAGTTCTGGAAGTTATTTTGCTCGAA
ATAGTGATGGAAAAGTAGTCGGTGTGTTCAAGCCGAAAGATGAGGAACCGTACGCCGCAG
GAAATCCGAAATGGAACAAATGGATCCATCGCAATTTATTTCCATGCTTCTTTGGAAGAG
CATGTCTAATTCCCAATTTGAGTTATGTCTCCGAAGCTGCAGCATACACGCTTGACTGTA
GGCTACGAACCCACCTTGTGCCCTACACCGACATAGTTCACTTATCGTCGAAATCTTTCC
ATTATGATTTTTGGGATCGAAGGAAGTTTTACAGGAGTAAGAAGCCTCTGCCTCCAAAGG
TTGGCAGTTTCCAAGTCTTCCTCAAAGGTTTCAAGGATGCGAATATCTTCCTCCGTGAAC
ACCCTTGGCCAGATCATGCAAATGGAACATTCAGAATGAATGATACTCACAGAAACAAAA
GAGGGTGGAAAGAGACTTGTCGTCCAGGTTCATCAAAGTCAGACGAGGGTAATGAAGGGG
CAGGGGCTAGCAGTCCTTCCGGATCTGGAGATGATAACCAAAATCGACGTTTTGTTTGGA
CAGATGCATTACAACAATCATTTCGAGAGGAGTTGGAGAAACTAGTTATATTGGATTATA
TAATGCGAAATACAGACAGAGGCCTTGATAATTGGATGATCAAAATCGACTGGGAAACTC
AGGGCGTTTCCATTGTTTCAGACCCTCCGCAAATGAGGAACAATCCAGATTCAGAACAGC
CACCTCGAGTAGTTTCTAGCTCTGACAACATCAGTATGTCCCATCTACCGGCATATCCCT
ACCGTAGTCAAGAGCCTATGGAAGCTACAAGTAGGTCGGCAACACCGTCTAGAATGGCAG
CACCAACAATGTCTATTGGTGCGATTGACAACAGTTTATCGTGGCCTTGGAAGCACCCCG
ATGCTTGGCGAAGTTTTCCCTTTGGATGGTTGTTCTTACCTGTATCACTGATTGGACAAC
CATTTTCACAAAAAACTCGGGAACATTTTCTTCCTTTGCTAACTTCAAAGCAATGGTGGA
GCGAGACTCAGCTAGAGTTAAGAAAGGTTTTCAGTCAAGATGCGGATTTTCAAGAACGCA
TGTTTGCTAGACAAATTGCTGTCATGAAAGGACAAGCTTGGAATGTCGTGGAAACCCTCA
AAACAGTAGACCATGGTCCTTTAGAATTGACTCGAAGACCGAGAGTTTGTGTTTGGGATG
ATCTTGTTGATATACCTGTTGCGGTTCCTATGAGAGTGCCTTCTGCAGAAATGCGAAGGC
GTAATGAGGCTCGCAATAGCCTTGATGATGAGATGGATATTAGTGCCGCCAATGCGACAG
CACCGCAACCAGATCTTCTTGGACTTGCAAGTCCATCTACAGAATTACCCAATCCAAATC
GGTTCGAGTTAGCTAGTCCACGATATAGTGGAGATGCTTCCCCTGACCTCGAGTCTTCTC
AAACATTTGCAAATTCAGGATTCTCTCGAGATAATACTTTCAAGGATGGAGTGAGGTTTT
CGGATCGACCACACCTTCAACATTCTAGAAATCGTATGAGTTATGATGGACCTGCAAGGT
CACCAAATGGCAATCGTTCAGAATCGAGAAGATTCTCGTTTAGCTCGAGGAGTCGTGGAG
CTGTTCAGACATTGTACGACGGTGATGATCTTGAAGGGGACTTGGGATATGCAGCAGCTG
AAGGGATGGAGGGACATCAGAGGAAGGTGATAGTAGAAAGACTTGAAACAGTCAAAAGCA
AAAACCCAGTTTTTACATGGTGTTAATGGGGAAAAGGAATGATGATCCGCAAAGGAATAA
ATGAGTACGAATATGTATATTATCTCTCGGAAGGCGGCGCATGATTTATTTTTTTGCAAA
TGGGCGTCAAAATAGTCTCAAGATAGAAATCTTCTGGGGCAGTAATCATATGGGACAAAG
GGGCTAGCTAGCATGATTTTTTTGAAATTGGTTTCTATGCCGTTCGCTTACAATGAAATA
AATTATATTTGA
>593f7254-aed3-41e1-a6c1-1d8bcf04311e (mRNA) 938 residues [Bfab07:562566-563503 - strand] [genomic] name=Bfab07g01520.1
TGTTGTGTTGTGTGATGTGTGAGGCAGCGCAGCATCGGGGAAAATAATTTTGGCGAGCCT
CGTTTTCTTCGCAGACGCAGACAGTGAGTGGACTTGAATCAAAAATACTGCATACCTTTA
ATTTTCAGACGGAAGTCACTTTTTGCAAGCTCTCGATACCAACCCTTTAAGTTCTCAATA
TCCCCTCGCCCATATCGACAATGTTTTCACGACCAGCTGTTAGAGCTTCGAGGATTTGCT
GCCGCTACTATGCAAGCCCTGCCAGTACCCCTCCGCCTATGCTCTTGAAGATCAGGTCAG
TACACACACCATCTCGTTCGTGGTTCTTAGTTGTGGGGAGGAATTGTCCTAATATTAGTC
CGGTAATAGGAATGATATGAAAACTGCCATGAGAAACAAAGATAGCAATCGACTCTCAGT
CCTTCGATCGCTTCTCAGTCAAACACTCAATGCCTCTAAGACTTCCTCGCCTATCAATAC
CGATATGCAAATGTTAGCTCTCCTCCGAAAGACTGCGAATGCCAGTCGCGCTGCAAGTGA
AGAGTTCAAGGCAGCAGGTAGAGAGGATCTCGTTGAGAAGGAAGAACAGCAATTGAAGGT
CTTGGAAGAATATGCCAGTGGTGTTGAGACAGTTGGCGAGGAAGAGATCAGAAACACAGT
CAAGGAACTTGTCAACGCAATGAAGGCTGAGGGGGTCAAGATGCAAATGGGAGATGTGTT
GAAAAGAGTGTTTGCTCCTGAAGTATTGGGAGAAAAGAATGTAGAAAAGGGGGAGGTCGC
AAAGATAGTAAAGGAGATCATGGCAGCATCGTAAGGTTGAAGGCTTTGGCCAATGTGTGT
CTCAATTGTATAAAAAGATAGCAAATCCTCGAAGTCTCAATAACCTTCTCATGTCTAGAC
TAGAAATCAATCCACCTCAATCGTCGTTACAATGGCTG
>b907cddf-7c7a-4f5e-9aaa-862129925099 (mRNA) 1368 residues [Bfab07:563940-565307 + strand] [genomic] name=Bfab07g01530.1
CGATTCCTTGCAGCATCCCCCCTCTCCAAGTTTCAACGTCCTGCTACTTACACACCAGAG
CTCTGTCTGCTCTCTATATTTTGATTTTATTACCTCCCTCTTATATGTTTCTTGATGCTG
TGCCACCAGAAGAACAACATTGAGCCACTGACGTTTTAACATTTGCTGGCACCATTCACC
ATCAGCTCATCGCTCAGCCTCTGACCTCTGACCTCTGACCACCCATACAGAGACGGACTA
TCACTCTTTATATACAATCTCCCATGTATACTACCTCTCCGAGCATTACTCAAGCAGCAA
ACTAACACAAGGTCATAGTCGATTGACCACCCAACATCAACCACAATAGACGACTTGACC
TCCAAAACTCGAACCTTGCGAACTGGATCACCAGAGCTTCATTGAGACACACAAACTCCT
AACATACATACCAATCTTCCAAATTCATCGTGAAAAATGACACCCATTGACCCTCGCCCC
GCAACCCACCTACCTTCCAACGAACCCTCTCCTCACCGCGGTCGTAAACGTCGTCGATCA
TCTGCGGCTTCTCCACCACCCATCACAACCAGTACATCCACGAATTTCCGAGGTCGAGTT
CGTCACCGATCACCTCAGACATCTCATTTGACAACATCCTCGCAATTGCCATTATCCTCG
CCCCTCAATATCAAATCAACGAACGCAAATGCAACTATGTCATCCCTTACAGCCACAGCC
CCTAAAGTCAAATACCAAAAGACTCGCGCCTCAGCAACGACAACAACAACGACTCCCTCC
CCATCATCATCTCTCCTGCTTTGCTCTCCACGCTCAAAGACCCGGAGAGGCCAATCACCC
TCCCGTTCTCGTAGCAAAGACCATTCAGATGACAAGGAGGTTCCCAGGAGAAGACAGAGA
ACCAGAAGCAGAAGTCGATCTCACAAAGTCGCGAATGATGAGAAGGATAGCAGTAAAGGA
AAAATGAAAGCTGTATCCGGGACAGAAAGAGCTTGAGATATAGGAATCTTGGAGTTTCAT
TGATTTTGTTCGTGGAAAGATACCCAGCTGGAATTGACTAATGAAGCACGATGAATACGA
TGTGGCCATATATCAAATGAAGACCCGAGAAGAATTCTCACTTGAGATACTTCTTCTGAA
TGCCACGCCCTGGAGTATCTGAAGAAAGTTTGGGATTGGATTGGATTGGGCGTATGGTTC
GGGTACGTACCAAGAATTGAGGAGTTTATTCCATTATGGGCTAGGGAGCATGTAGGTAAT
GGGCAGATAGGAGTTAGGCCTGAATGCGTGGAATTTTTTTTTCATCTTCGAGGATAACAG
TGGCTAGTCCGCTCAATGAATGGTAAATATCAAAAGCAAATGCCCATC
>f94de115-9c8d-4451-b896-aa095fda984b (mRNA) 3319 residues [Bfab07:566506-569824 - strand] [genomic] name=Bfab07g01540.1
TTCTACATCGAAAGTATCACCAAATCTTTCTTTGTATTATCTCTCTATCCCAAATACTTT
GGGTCTGTAGCAGGTATCTACAAATCATTTACGATACTTCAGGTGGTTCAATAAACCACT
CAAGTATCTTTCGTTCGAGCGTGTGTCGAACGTCAAAACAATACATCTTCTTTAATCAGC
TTCTCGAAGCACCACCGCCAACATGGTTAAGTAAGTATCCTTTTTTTCTTTCTCTTAACA
TCATACCATCTGTGGCAGATGCATAGATCGAACTACCGGATCGCAGATCATCAAAAAGTA
TCTTGAACCATCTTGTTTTGATGGATCAAGGACTTGGAAATGATAAGCTCGAGATGGAGG
ATTCGGACATAAGCTTATGCTGTTGACAATGAACTGTTTGCTAACATTTCTTCCCTTTGT
AGCTTCACCGTTGAGGAGGTCCGCCAATTGATGGACAAGGCTACGAACGTTCGTAACATG
TCCGTCATTGCCCACGTCGACCACGGAAAATCTACCCTTACCGATTCCTTGCTCTCCAAG
GCTGGTATTATCTCCGCCGCAAAGGCTGGTGATGCCAGAGCTACCGATACTCGTGCCGAT
GAACAAGAGCGTGGTATCACCATCAAGTCCACTGCCATCTCCCTCTACGGTAACCTCGCA
GACGATGAAGACTTGAAGGATATTGTCGGCCAAAAGACCGACGGAAGAGATTTCTTGATC
AACTTGATCGATTCACCTGGTCACGTTGATTTCTCCTCTGAAGTCACTGCTGCTCTCCGT
GTCACTGATGGTGCTCTCGTTGTCGTCGATACCATTGAAGGTGTTTGTGTGCAAACCGAG
ACTGTCCTCCGTCAAGCTCTTGGTGAGCGTATCAAGCCTGTTGTTATCATCAACAAGGTC
GATCGTGCTCTCCTCGAGTTGCAAGTCTCCAAGGAAGATCTTTACCAATCTTTCTCCAGA
ACCATCGAGTCCGTCAACGTCGTTATCTCTACCTACTTCGACAAATCTTTGGGTGACGTC
CAAGTTTACCCAGGTAAGGGAACGGTTGCTTTCGGTTCCGGTCTCCACGGATGGGCTTTC
ACCATCAGACAATTCGCTCAAAGATACGCCAAGAAATTCGGTGTTGACAGAAACAAGATG
ATGGAGCGTCTCTGGGGCGACAACTACTTCAACCCACACACCAAGAAGTGGACCACCAAG
TCTTCCCACGAGGGTAAGGAGTTGGAGCGTGCTTTCAACCAGTTCATCCTCGACCCTATC
TTCCGTATCTTCGCTGCTGTCATGAACTTCAAGAAGGACGAGATCCCAACTCTCCTCGAG
AAGCTTAACATCAAGCTTTCTGCAGATGACAAGGACAAGGAGGGCAAGCAACTTCTCAAG
GTTGTCATGCGTACTTTCTTGCCAGCTGCTGATGCTCTTTTGGAGATGTTGATTCTCCAT
CTCCCATCCCCAGTTACTGCCCAAAAGTACCGTGCTGAGACCTTGTACGAGGGTCCTCCA
GATGATGAGGCCTGCATTGGTATCCGTGACTGTGACCCCAAGGCTCCTCTTATGTTGTAC
GTCTCCAAGATGGTACCAACATCTGATAAGGGACGTTTCTACGCTTTCGGTCGTGTCTTC
GCTGGTACCGTCCGTTCCGGTTTGAAGGTCCGTATCCAGGGTCCTAACTACACCCCTGGC
AAGAAGGACGATTTGTTCATCAAGGCCATCCAACGTGTTGTTCTCATGATGGGTGGTAAG
GTCGACCCTATCGATGATGTTCCAGCCGGTAACATTCTCGGATTGGTCGGTATCGATCAA
TTCTTGTTGAAGTCTGGTACCCTCACCACTAGTGATACCGCTCACAACTTGAAGGTCATG
AAGTTCTCCGTCTCCCCTGTCGTCCAACGTTCAGTCGAGGTCAAGAACGCTCAAGATCTC
CCCAAGCTTGTCGAAGGTCTCAAGCGTCTCTCCAAGTCCGATCCTTGTGTTTTGACTTTC
ATCTCCGAATCCGGTGAGCACGTTGTTGCTGGTGCCGGTGAGTTGCATTTGGAAATTTGC
TTGAAGGATCTCGAGGAGGACCACGCTGGTGTTCCTCTCCGTATCTCCGACCCTGTCGTT
CCATACCGTGAGACCGTCACTGGCAAGTCCAGCATGACTGCTCTTTCCAAATCCCCCAAC
AAGCACAACCGTCTTTACATGATCGCTGAGCCTCTCGACGAGGAGGTTTCCAAGGAGATC
GAGGCCGGAAAGATCGGTCCCCGTGACGATTTCAAGGCTCGTGCCCGTATCTTGGCCGAT
GAGCACGGATGGGATGTCACTGATGCCCGTAAGATTTGGTGTTTCGGTCCAGACACCAAC
GGTGCCAACTTGTTGGTTGATCAAACCAAGGCTGTTCAATACTTGAACGAAATCAAGGAT
TCCGTCGTCTCCGGTTTCCAATGGGCTTCAAGAGAAGGTCCAATTGCCGAAGAGCCAATG
AGATCTTGCAGATTCAACATCATGGATGTTACCCTCCACGCTGATGCTATCCATCGTGGT
TCCGGACAAGTCATGCCAACTACCCGTCGTGTCTTGTACGCTTCTACCCTCTTGGCTGAG
CCAGGTCTCCTCGAGCCAGTCTTCTTGGTCGAGATTCAAGTACCAGAATCTGCCATGGGT
GGTGTTTACGGTGTTCTGACCAGAAGAAGAGGTCACGTCTTCGCTGAGGAGCAACGTCCA
GGAACTCCTCTTTTCACCATTAAGGCATACTTGCCAGTCGGTGAATCTTTCGGATTCAAC
GCTGATCTCCGTTCCCACACCTCTGGTCAAGCTTTCCCACAATCCATCTTCGATCATTGG
CAAATTCTTCCAGGTGGATCGCCAATTGACGCAACCTCCAAGACTGGACAAATCGTCCAA
GAGCTCCGTAAACGTAAGGGTATCAAGGTTGAGGTTCCAGGTTACGAGAACGTAAGTCTA
CTTTACATCATAATCTCTTGCACAAGAGAACATTTCGCTAACCATTTCAATAGTACTATG
ACAAGCTGTAAAGAACGAATTTCCAAAATAAAAGATACCGTCCTTTCCATATTCCCATGC
ACATTTCACATCAAGATTATCTCAAGCTCGGCGCTTTCATGATTTTATGAGCGAATGCTC
GTTAACCACTTCGGCTTGATAGCCGAATTGGTATAAAAAGCTAGCCGCACGCCATGTGAT
AGACAGATGAGCCTTTTCACATTTCTTGAGCTTCTGTTTTCATTTCGAGTCTTCATGTAT
TTAGCAGCATGGCGAATTGAAGGATTTCAAAAACATGATTTATGACATTTAATAAATGTA
TCCTATGAATTGGTGAAAC
>5a8630d9-df71-4032-9c01-c34e35ff9db2 (mRNA) 10261 residues [Bfab07:570789-581049 - strand] [genomic] name=Bfab07g01550.1
ATACCTAACCAAAGAGGTTTGATGCTACTCTGACCATTCCGCTTGATACACCTTTGTATC
TACAATCTCTTCGAAGACGAAAGACCAAAGACTGCCGATATTCGTGAGACAATGCAATAT
GTAGCATGGAGGCCGGAATCTTTGCGATCATGAGCATTTCAGTCGGAATCACGTAGACCT
TTACTTCATACACACTTCACACAAGAACATTAAAGGATGGCGAGCAGTAGTGGTTTGACA
GCATCCCCTCTGCGAGCGGATCTGGGATTCAATTGGTAGCTTTTTGCATTCCTGGCGCAA
ACGAAGGCTAACTAACAGATTAGGATTTTCCTCATCGAGTTGATTGTCTGTGGGATTGTG
TGAGTCTTTATACTTTGGTTGTTTTTGCATAGCTAACCCTCGGCATAGCACATTATTCTT
TCTTTTCTATTTCAACCGTGTTTTTGCTGCTATCGTATCATTTGGTCTTCGAAAATGGAC
ATGGCATCAATATCAAGTTTATGTCGACATCCAAGCTTTACAAATATCTCTCCTAGGAGG
GCGTGTGTTTTTAAAAGGTGTTAGATATCACGGCGACAATGAAACTATATTGATACAAAA
TGGATACATTACATGGAAATATTGGCTCCGCAATGTGAGAGAATTGGATTTAGAAAACGA
CGAATCTACAAAAAAAGAGAAGGAACGGGAGTCGACTGTCGATACGGGACTAGATCACGA
GGAGGGGCCGAAAGAAAAGAAGAAACTACCGTGCCGATTCGATATCGTTTTGAACGGGGT
GGAATGGTTTGTTTACAATCGAAGTGCGGCATATGATGCTATTATCTCGGGAATTGCTGG
AGATGATGAGAACACAGATCGTGCTGCGCAGAGCCATGGAGAAGATTCCTATCAGCATGT
GAGATTGAGAAAGAAGGGCGTTGTAAATGAGCGTGGGGATGTGCAAGACTTGTCCAAGAA
ATCTACAGCCGATTCTCAAACCTTACCGTCACATATCGAAGAACAAGCTAAGCCTGGAGC
ACCTCACATAGAGGATAAATCTGACAGATCTTCCGCGAATTCTCAGACAGCCGATATGGA
CAATGATGAGTCTCATGCAACTGTGGAATCAACTTTCTTACTTAGGTTTCTTCCAGTTCA
TATAGAATGTTCCAAAGCTGCATTGGTACTAGGGAATGAAAACACTAAGAGCGTGCTCAT
TGTTAAAATGGACAAAGCCGAAGGGGATTTGGACGCCTCAGCATCGACTAAACTGGATCA
GTATAAACAGCTAATAAACTTTCGTTTCGAGCATCCTGTTATACAAATGCAACCGAATGA
TGATTACAAAGAAGATCAAGCTACGGCAGCCTGTAAAATACAACGCGGGGTTCCTGAGCA
GTCGGACGCTATTGAAAGCCGCGTCCCTTCCCACAGCTTTTTCCATCGACAGCGCAAGAG
AGCATGGCATACTATTCAAGACCTCGTACCTTACTTTCGAAGTTCTGTAGAATCTTTCTC
GTCAAATGATGATAGCCGTTCGAACTCGCCCATTCAAAGAGGACCCAACCCTAGTAGCTG
GCAAGGTCTCTCGAGGTATCTGGATGAAAGTGAGCAGGATGATAATGCGCGGTGGTCTTC
CAACGAATATGCAACAGTCACCACTATCGCTGATAGCCCTAGCGCTACTATGAGATTCTA
TTGGGATGTTCCGGCTAAGATCCCATGGCGTCGTGAAGTATCAAAATCAGCATCTAATAA
CATCAATGGTGATGTTCCTCCTGAATGGGGGATTGATCTTGTTCTGGAAGGTGCAATTAT
CAATTACGGTCCTTGGGCAGATAGACAGCGGGCCGAGATCCAACGAGTCTTCTTTCCAAG
TCTGTGTAAAGATGCCTCTCCGGCCAAAATGCTTAGACCTGGCCAATATAGAGTGCCAAC
ACAATTCAAGCTTTACATTGAACTTGACCATGAAACGACACTTCGAGTGCCCATTAGAGA
GGAATCGAAGAATTGGAAATGGACAAAGCAAGCAGAGACTGCTGGTGCCCGGCAGAACGA
GCAAAAACGAACTAGTAACAGAAATCGCAGGAGAAAGGATGACAAGGGGACCCCTGGGCC
CGAGGTTAGACCTTTTGGTTGGCTGGATATTAAGGTTGGCGCGAATGCAACGATTCGATA
CCTGATGGATATGGTGGCAGGGGATGTTGGATTTTCAAACAAGCTTCAATTGGATTTGCC
CAACACGGAGATAACTACAAGTGTTAATCACGGGCTACTTTGGAGATCTACTGGAAATGT
GATTAGTTGTGATTTATCGAATCCCTTACAATGGAACGGTTTCCGAACATGGAATTTCGA
TATTGGCAGTCGCGGACTGGAACTCTTTATTCTAAGGGAACACATCTTCCTCCTCACAGA
TCTTGTTGGGGACTGGGCCAGTGGCCCGCCGCCAGAATATCTCACGTTTACTCCGTTTCG
ATACTTGGTGAACCTCAATCTTCAGGAATTCAAACTCTACCTCAATGTCAATGACTCCAA
CATAATCAACAATCCTGCCGACTTTGACGACAATACCTTTATCATCATCTTCGGAGAGTC
GCTGATTGCGGACATTTGCATCCCCATCGATGCATTCCGACCTCACCGAAATGATATATC
ATTTGATGTTTTCGCTAAGCACGGTGGTCTGAATCTGCATGTGCCCCCATGGAATACGCA
GGCTACTTTTCTAAATTCCAAAGAGATTGCTGAACTCGATTCCATAAAACTTGGAGGAAA
ATATCAATATTGTGCAACCACTTCTTCCAGTAATACCGATACACTAATACTTGATGTGCA
TGGCAATGGGGCTACAGCGCAGTTCTATGGGTTCGTCATTCGATATTACCTCAAGGTTAA
AGACAATTACTTTGGTGATGATATCCATTTCAGGACCTTAGAGGAACACCAAGAAGCAAT
TCGTGTCAAAACCGCCAACAGCCAACAGGACGCGAACGTTCAACCTCACAAGAAGAGCAA
CGATCTCGATGTGATCTTGAGCATATCTGCTGACGAGTCCAGTGTAATTTTACCCGCAAA
CTTGTATTCAGCAAAGGACCATATTCGAATCGAGATTGCGACTCTGGCTGCCGATCTTCG
CTTTACCAACTATTACATGGACTTGGATGTAGAGCTTGGCACACTAGCCTTCTCTTTGGG
CACTGAAAGTGACAGCAGAATGTCTTTCGCTAGCGCAACGTCTGGTACTCAACTTTTCAT
TGACGGTCTTAATGTCTCGGGCAACCGCCTTTTTGGCCTACCTCCTATTGAACCGACTTA
TGTCTGTAATTGGGACTTTAGTGTGGGCGCAATCACTGGCGAGTGTACAACCGAGTTCTT
TGTGCGATTACTTGGAAGTGTCAAGGCAGTTGCATTTTCCTTCGACGATGATGAAAATGC
TCTGCCGCTGACTACCGAATTAATATTGCACGATGTAACATTTCTCCGTGCCTCGGTTGA
TTCTATACGAATTTGGATACATGTCGAAGAGGCAGCGTTTCTTTTTTCCACTTCTAAAAT
TATGTTGAATTTCGATGATTGGGCTGGGTCCCATTACTCCAAGAAGTTAGATCTTCAAAT
ACCAAATCTGAAATTTGGTTGTGTTGATGCGGAATCAGCTTCAAGACACAGGTCAAGAGC
ACAACATCCCGTTGAGACGCATGGCCTTATCCAAACAACGATCTCATTTGGGATGATCCT
GAAGAAGCTTGCATTTGTAGAAGATCGGCGCCTGCAGCAAGCACACCTAAGACGTCATGA
TCGAAGAACGCACAGGACCGATTTTCTCTTACATGATTATGTTATGGCAGAGGTAGATCA
AGATATTGTTGAACCGCCTGCAATGTGTGTTCCGCCAATGCCCCCTCCACTCTTCTACAG
TGACGACCTTAGCCAAGACAGGCCATCTACTTACAAGATGTCCTCCAATGTATCGTCGGT
TCGTAGGAATCGACTTCAGACTGGGCGTAAAAGCTCATTCTTGACCGCTTCTAGTTCAAG
CTTCAGAAGCGATCAGAGTATTCTTCGACCTCATTCATTTAATCGTGAGGGAACATCCAT
CTCTGCTTCACGCTCCCGAAGTATACATGCTGGCCAATCACATCTCAGGGACCTTTCCGT
TTCGACCGGTCGTCAATCTTCATTCTATAGTGCTGTTGGCGAGCCTAGAAGCCTACCTCC
CTCTAATGTTACCTTCTCAAGCTCCTATATGGCACCATATTTTCCTCTTGAGGCTGTTGA
ACCTGATGTTAAGGATCTTCCAGTTCTAGATCCAGAAGCTCAAACAGAAATCACCATGCA
ATCACCTCGCATGAATTTAGAAGACATCCAGCCAGATCGAGTGGGCGAGAACGCCACTCA
CGTCAGCTTTATTGTGGAAATGCCCGGTGGCATCAAGGCAGTGCTTAGCCCGAAAGCAGT
GGGAGCTGTTGCGGATTTGCTTACTGCAATACAGCCTGTAGATCCTGTGGATATGATAGA
TGATCTCCAGATTAGCTCTATGGGAGAGATATTCGGCAAGGAAAAAAAAGACAAGGTACA
TGGCGAGGTTCTTGATATAGCTGTGCGGACTCCAGGCATATGTCTTCGATTCTTAAATTC
GCCCGATGCGCATGACTTGACCAGTGATAAAGATGAAACGCATGATCAGTATGATCTTTC
TATTGCAAAACTTGCTATTACCTCAAGAAGTGAAACAACTGGAACTTCGGACCTCATCGC
CGCCCAAGCTGGTCGGCAATCCTCTGCAATCCATTTATACCTCGGCTCTGCTGTCTTGGC
TGCGAAGGAACGATTCGGTGATCTAAATGATCCTCAAGCAGGTGTGAACGTCATTCTTGA
AGATGTAGTGTTCTGGATTTCTTCTGGACATAACACGGCGGCAAATATAATTTTCAAAAC
TATAGAAGCCAACACGGCTAGCAGTAAGATTGAATATCTTGCATCATTGGTCCATCGTAC
CAATGTCCTCGCTGATCGTGTAAGTGAGACGTTTGCATCCAAATTAAGCCAACAACGAAA
TCGTCTACAACTATTCACATATCTCGTCGCGACTGCAGGGGAGCATGCCACAGATCCTTT
ATTTTTGACAAGGCCGGCGTACGTCCTTCGAAGCGCACAAAGACATTTGAGAACCCATGA
TTCGTGGAAAGTAATTGCTCGGCTTCGACATATGTATTCAATACTTGGTCCATCTTCGCA
ACGCGATATCATTAGCCGTTGCGCAAATAATTCAGAAAGCGTTCCAGAAGACGCTGCTCA
GCGAGTTCTCGCTAGCTTTTCTCAATGGAGGAGCTGGGATCTCAACAATCTTGGCACTTG
TGTCTTGATGAGTAATGTTTTCGGGTTTGTAAAAGATGATGCCACGGTAGCTGTAGCAGA
AGCACCGAACTTAAGCATATCATTTCGAACAGAACTTATAAGGCTTGTGATAGATCCAGG
CCCGAAGCAAAATGAGGTTGCACTACGTTCTTTGTCGGCCAGGGTTTCGGTAACTACGAG
TTTTCCCATGAAGTCTCCAATATCTGTGTCGCAGCATGGCTCAGATATAGACACATTTCA
GAACATTGTCGTGCATGTGTTCTGTGAGGACATTTCAATCAATTTAAATTGGGAACTGTG
TGAGCTTGTGCAAGATATCTTGAAATTGTATCAACAGAGCGAATCAAACGCAAAAGTACC
AGAAAAACCTTCACCAATCACGCTAGCTCGCCCAAAAGTGAAAGCTAAACAAAATCTTCA
GGTCGTGATTGCAACCAACAAAGGTTCTATCACACTTGACACAATAAACCTCAGATCTGT
TTCCATCAGTAATGGCTTGAAAGTATCTGTTGTTTCGACAGAGGACATTGCTAACACGAC
TATGGTCAACATCATGCTTGCCGCAGAAGCTGCGACCTCGAAAATTCAGAGTCATTCACA
ACCTTTAAGTCTGTACCAGCTGCGAAATCCGAGTGTCTATGTGTCGTTCGAAAACTCAGT
GCTCGACGAAACTCCCCTCAACGTTTTTAAAGTTGCAGCAAACTCTCAAGAGTTGTCATT
TATAGTCCAGCAAGATATTGTCGCACTTATCGAAGTCTTAGACTTAGTGATTGGGGATGA
AGTTGCGCAGCTGAATCGTTTGATACCGAAACTTCCTACAGCCAAACGACCTGCATCGCC
GCCGAACATTTTGCTACCAAATGTTCAGGAACCAAAGCCCATCAACAGGATTAATTTGGC
ACTGTTCCTAAATATGTATCAAATCAGCATACCTCTCATACAATCGTTGACATATACCAT
TTCAGGTGTTGTTGCTAGAGCTTCCTTGGCAGCTCAGTTTGGGTCTGAAATTGTCTTTGA
TTTTGACATTAAAGAACACTCACACGATGTGCAAACAGCCCAAAATGATAAACAACAAAG
CATATCGTTATTGCAAATGCCACCAACAAATGGTCGTGTCGTTAGCAGTATGTCCGTGGA
AGAGAATAAGATTTCAGTCTTTGCTTCTGTGGAACCCATAGAGCTCGATGCAGCTGCTGT
TCATAGTCTCTTTACTGCACTCAATCGACCAGAAATATCTAGTGTTGTTTCTGATATCCG
TGACGATATCAAAGCAATACAAGCACATGTTGAGGAAATATTCGGTCCCAGCAACAGTCC
AGTACCGGATTCACCGCCGAAAGCCGGTCCTGCTCTAATATACGATGCTCACCTGACCTT
TGCAGGTTTGGATGTTTATGCAAACGCGGAACCTTCACGAGAGGGAAAAACCACTGCAAG
ACTTGAATTCAACGTTGGATGCGTGCAGCTTCTAGTTGCAAACAGGCTGGAGACACATGG
GGCAACATATGAATTTCCAGAGATCCATATAAGTCTGCATCGAATCATGTTTGAGTTGTC
TCGCCTCAACAATGGGACAATGGAACCTTGCGGAAATCTTGCATTCGCTGCTTTCTTGAC
TGCCACGAGTAAAAAGAACGAAATTGGGGACGATGTTAGATCATTCAATCTTACTAGCAA
TGGCCTCGAAATCAACCTTTTCGCCGAAACTGCATCTTCTGTGGTAGACGTCATGGGTCA
TTTGCAAAATAAAATCAGAGACATCGACTTCACTAGGGAAAAACAGTATTTGAAGAAATT
TCGTAAGTCTAGACCAAGGATCACAGTCAACGATGAGCCCAAAGATCATGATAGCGTTGC
TGGCTCAACGTCTACTATTATGTTTGCTTCAATGTACACTCTCGAATTGCTCAACATCCA
AGTTAGTTGGCTGGTTGGGAATACAGAAAACGATCGCATCTCGCAGTCTGAGAAGGAAAA
TCTGGTTCTTTCATTGAAACGCATTGATTTATCAACGAGGAAGGAGAATTCTGCTCGACT
TACCATTGAAGATCTACAACTGCAAATGGTACCCTCGTCACAAGACAAAATCCAACGTTC
GCTTAACTCAGCTTTATTGCCAGAAGTTATCTTCAATGTTGGATATATCTCTGGTCAAAA
TACTCGTAGATTGGCATTTCAAGCGGCAGGAAAATCACTTGATCTGCGACTGACTTCTCA
ATTCATCATACCTGCCGCTGAGCTTCAACGATCAATTGGATCTGCTACCGAGATGGTACG
GGTAGCATCAGCTACATGGAGTGCGAGCCCACCACCGACACTATTACCTCCAACGTCTCC
CAACAAAAGGCAGCCCTTCTTCGGGAAGAAACGTATGGAGTCTTTACTAGTGGATGCAGA
CTTTGCTGGAGCCGTTGTATATCTGTCGGGTAGAAAATTGACAGAGACCACACAAACAAA
TCAAGCAGGCACGACGGGTCGCGTGCCTCATGCTGGAAGATATGGGCAGTTCACACATAA
GGATGCGGGTAGTAGCACAGTCTTACGTGCACCTGGCCTAGCTTGGAAGATAGAGTACAC
AGATAATGGCCTTGATGACCCATCTCTGAATGCTGAGGTGAAAGTGGACGCTTCGACAAA
CATACTATATCCATCAGTTGTGCCTCTCATTCTCGAGATATCTTCTTCAGTCAAAGACAT
TGTAAGCGAGGATGGTAAGGATAAAAAGTCGGTTCCAAAAACATCACCACAAAAGTTCAT
AGGCGCCGATGACGATAACATTCTGGCAGCTGATCCCAGTACCGTCCTTGGCCGCACCCG
CCTCAACCTAGGGCTTAGAATCTGCAAGCAAGAATTCACTCTCAGCTGTCAACCTATAGC
TCGTGTTGCTGCTAGCGCGCGATTTGATGAAATTTATTTAACTGTCAACACGGTCCGATC
GACCGAGCATGGGCATTTCTTTGCTGCATCCGTTGCTTTCTCAAGGCTGCAAGCCTCAGT
ACAACATGTTTACTCCAGAGAATCTACGGGGAGCTTTGATGTTGAATCAATCTTCCTATC
TCTCATGAATAGTAAGCATGTGAGTGGTACCAGTGGAATGTCTGCAATATTAAAGATTAG
CCCCATGAAAGTCTTGATCAACGCCAAGCAATTACAAGATTTTTTGCTCTTTAGGGAGAT
TTGGGTTCCACAAGAGTTGCGTGAAGGCTCTACAGCTCATGTATCATCAACTGACAATGT
ACAATCATCAACTTTTCTCGTGCAGAGATACCAGCAAGTTGCAGCAACTGGTGCTTTCCC
TTGGAATGCTACAGTCTCCATTGCTGAGCTGGACGTTCAATTGGATCTCGGCCAGGCTAT
TGGCAAATCTGCTTTTATTATATCAAATTTCTGGATCTCATCCAAAAAGAATTCGGACTG
GGAGCAAAATCTCTGTCTCGGCTTTGACAAAGTTGGTGTTGACAGTTCAGGCAGAATGAG
TGGATTCGTGGCACTTCAGGATTTCAAAATGCGTACCTCAATCCAATGGCCAGCACGCGA
GAAGGCACTGAATCAAACACCACTAGTCCAAGGCTCTTTGGGTTTCAGCCAATTGAGAGT
TAAGGCTGCATTTGATTATCAAGCCTTCTTAGTTGCGGACATCACTTCTTTCGAATTCCT
TATGTATAATGTTCGTAATGGCACGCAGGCAAAGGGAGATCGACTCGTTGCCATCTTAGA
CGGGGAAGCCGTACAGATTTTCTGCACGGCAACGACCGCATCACAAGCACTCGCTCTATA
CCAAGCATTCTTGCGACTTGCTCAAGAGAAGAAGAGTAATTATGAAACGTCCCTTTCGGA
AATTGAAAAATACATTAAACGTAAATCGATCTCTCAGGCAATGACACCCAATCCCAAAGC
ACCTGTTACGGAGCCGAAATTAAAAAAGTCGAAATCACCCGTCTCACTGCACACTGATGT
GATTGTCACACTGAAAGCATTGAATATAGGGGCGTTTCCAAGCACATTCTCCGACCACCA
AGTCTTTAAAATCGAGGCACTCAATGCACAGGCACGATTTGCGGTAACCATGGATCGGGG
AAAGATTCATAGTATTTTAGGTCTCACTCTTGGTCAGCTTCGCATTGGGCTTGCTGGAGT
GAAGCAAGATGAGGCGCCAAAGTCCGTTAGCGACCTTTCTGTAGAAGATGTGGTCAATAG
TGTCACGGAATCTCGGGGCGGTACCATATTGAAAGTTCCCCAGGTCGAGGCCACGATGCA
AACTTGGCAGGCACCTGGTTCCAACCACATTGATTACATATTTAAAAGCTCCTTTGAAGG
GAAGGTCGAGGTTGGATGGAATTATTCTCGTGTCAGCTACATCCGTAGCATGTACGGTGC
ACACACAAAAGCATTAGCACAAAGACTAGGAAAGCCTTTACCACCCTCGGCTCTGAAAAT
TACGGGTGTACCAAACGCAGAAGATCCACAAAGTCAAGAGCGCGAGCAACAAAAGATTAC
AGCCGAAGTCAACGTTCCTCTATCGAAATACGAATACACAGCCCTTGAGCCCCCTGTCAT
CGAGACACCTCTCCTTCAAAGTCTAGGTGAAGCAACGCCACCCTTGGAATTTTTTGGGTT
ACATCGAGAACGACTTCCAAATCTCACACATCAAATAGTGATTGTAGCGTTATTAGAATT
GGCTGGGGAGGTAGAGGATGCTTACGAAAAGATTTTAGGGTCTTCTTGAGCACATGTCAA
CTCTGCGAAACATTTTTTCATGTATCGATTTCACACATAATCTTTACAAGTAAAAGCGAT
GGAGTGGGAGTGATGATCTTCTGATGGAGGACTAGAGGATGGTCCTAGGGTAGCTAGTTG
AGTTTATACCATTAGTAGCAACTTATTAGTATTCAATTTATTATTCTTGATATATCAACT
T
>2fd9be69-70c7-418f-bd78-07fd2a99af37 (mRNA) 2900 residues [Bfab07:581213-584112 + strand] [genomic] name=Bfab07g01560.1
ATAGCTATCAAGACCACCAACTGCCTGCCTGTCTCGCTGTGTGAACACTCTCCAGAGATC
ATATCATTCACTAGACTTATCATTAATTTTTAACAGTATGAAGGAGAGTTTCGCAGACCA
TGTTAGTCGCACAATTTGAGACTTCCAAGCTCCAATCTACTCCTATAGCTTATCGTGACC
AGGAGCGCATCCCAACTTCATTAATTATTCACACCTTCCAAGATGATGGCAGGAAGCAGT
GACCTATCCGGTGGTACTGGTGAGAAATTGACAAATGCAACAATAGTAGTAGCTGGTTCT
GCTGCATTGCTTGCCTCTATTCTATCGATCGTGTATGTTTCAGAGCGTCTTCGTTCATTT
ACTTTAGAAGCTAACATCTTGTTCAACAGGTCGGTTTGGTTGCAAACGTACGTTGTAAAA
GCTACATGATACAAAATTTGATCAATTCCTAAATATTCATAGTAAAAACTATCGAAAACC
TCTCTTGCAACGCTATGTCATTCGAATCCTACTTATGTACGTGGATGAAATCTTCAACAG
TATTCACAGTTCCTATACTGACCAATATGCTTAGGGTACCGATATACTCAATCTCGTCAT
GGACTAGTCTAGTTTCTAGAGATGCAGCGATGTTTATCGATCCTATTCGTGATGTATATG
AGGTAGGTCGGGCATCTTTGAATATCATGGCTCGAAACTAATTATTGGCAGGCTTTCACA
ATTTACACATTCTTTCAACTCCTTATAAACTTCCTCGGGGGTGAACGAGCATTGATTATT
ATGATGCATGGACGAGAACCGGTTCATCACCTTTGGCCATTGAACCACGTCTTTCCCAAG
GTCGATATATCCGACCCTCATACATTCTTGGCCATCAAACGTGGGATTCTACAGTATGCT
TGGTTGAAGCCTCTTCTTGGACTTTCAGCTATAATTATGAAAGCTACGGGTGTCTATTCT
GAGGGTACCATTTCTTTGACCTCCGGCTATATGTGGAGTGGTATTATTTACAACATTAGC
GTCACACTAAGTCTATATTCACTCGGAATGTTTTGGGTTATCATGTCCAAAGATTTACAA
CCTTTTCGACCTGTGCCGAAATTTTTGTGCATTAAGCTTATTATATTTGCCTCATACTGG
CAAGGATTTCTTCTTTCGATTCTGGTTTTTCTCGGAGCAATTCCAGACAACGTGGAAGAT
TATACAGCCGATAGCCTCGCCGCGGCAATACAAGATGCCTTAATCTGTATCGAGATGCCT
ATTTTTGCCATCGGACATTGGTATGCCTTTTCATGGCATGACTATGCAGATGTCACTATA
TCTGCAGCTAGAATGCCGGTCCGCTACGCTATTCGAGATGCTTTTGGCATTCGTGACCTC
ATCGAGGATACGAAAGAGACATTTAGTGGGAAGAAATATGAATACCGGTTGTTTGATTCA
GGAGACAACGTATTGGCGCATGAAGGGTCATCGTCAAGAGTAGCTCGGATGATGGAAGGT
ATGCGATACGAGCGTGGCGGGAAAGGAAAGTATTGGATTCCCAAACCAGGCGAAGCAACC
GCAAGAACACCGTTGCTTGGGAAAAACGCTGGATCTCCTGGAAGTCAATCTCCCGTACAA
CCCCGTGATGGCGATTCTGACTACATGGGGTGGGGAAATGGTGGGGTAGAACAGCAAGGT
CTTGATCCCGAAGAAGAAGGTCTTTACGAGAGAGCTAGACAACTGGAATTCGGGGATTGG
AACGTAAGTAAACTCGGCTTACTACTTGCTTAAGCTAATCAATCATCTATAGTATCATGT
GATCACTGCTCATGAACCGTCTAGGGAAAGATGGCTCACTGGGCAGCCTGATCTTCTGAC
AACTTCGGCAAATCGTCATCTCCTTCAACCTACTGATGATAACCGTATTCGAAGAGCCAG
TAACATTAGAGAAACGGTTGAGGATGTCACTAAGCGAACCAAGAGAAAGTCTTCAAGGAA
TAGTCGTAGCAGAGATTCTAAAGGCAAGAATAAAGAAAATTCACCGCTGAGTGAAGAAGG
AAGAGCGCCAATGCTCAAAGGCATGTTGCGACAGCATTCGTCTGCCTCCAGTTCAGCCAA
ATCCGACAGAAGTCAATTAGTTGATGTCATCGTCGAAGATACTGCTGCAGAAGAAACAGA
AAGAGTTCGGGCTCGCAAAGAAGGAAGCGCGGGATGGAATGAAACTGAGCCCCGTCGTTT
TGTGTAAGTCCATTCTTTCGTTAGATCAAAATTCAAGGCTAATTTACAAAGGCGAACATA
TGGAGACGGTACAGGTGAGGACATTCGGGAAGGATTCGAGCCTGATGATGATGTAGAGGC
TGTGGATCCCAAACCAGGTCTTGATGAAGAGTTCGGAATTGATGGGGATAAGAATCATGG
CAGTGATCAGGACAACTCGGAGGAATCACGCCATTGGAATGAAGCTCGACAAGAGAACGT
GCTATTAAAGCCTAAATACGGAGTTGATGGAGAGGCGTTTGAGAATGTTTGGGGTAGTGG
GGAACCATCGACTCCTCCACGGGAAAACCCCTGATGTATAATACCCTTTGGTCTTTCGGG
TGCGTCTCGGATATATGGTTGAGGCGTTTTGTTTAAAGCATTGTGTAAACATACGAGGTC
TTTTTTGTTCTTCTTCTTTTTCCTTTTCTTTTCTTTTCTTTTCTTTCTTTTGTCTCTCCG
GTTTTACACACATTCATAGCGTAAATTAAATATAGGACTTTTCTTCCCAAATTATCTGTG
AAATTTGGAAATGTAACGTACGCCATCTGGGGTTCAAAATGCTAGCTAGGGTTGTGATAG
CCAGCTATTTGCTGGCTTGCGAATGTGGCGAATCATATTGACATGGGACCAAGAAATGCC
ACGGGGAGATAGAAAATACT
>d78cd354-261b-40cf-a24e-60991efe2af9 (mRNA) 2520 residues [Bfab07:585303-587822 - strand] [genomic] name=Bfab07g01570.1
GAACCTCGACAACATATGTTATACAATCTTTGACCCCGCACCAGCTGCCTCAAGTTAGAT
TTGTAAAAGCAACAATAGCACGAAATTTAGTCAAAACACCTTATAAAGAACTAACATGGC
GAGGTAGGTTCTCTGTGCCGTACATTTAATGCACCTAGAAAACGAATAACTTGCTAAGAT
GCCAACTTTCTACCTAGCCATCCCGAATCTCAGACAGTCGAAGTGGATAACACTTATTTC
GAGAATGTGACATACCACAATCGACACTTCCAACAGTATGCCATAACGAACTTGTCTTAC
TTCCAGCCTATCGATGAGGTAATAAGACCAACAGGCACAGAGCAGTCTGTAAAATTTTAA
CTAAAACACCCACGCAGGACGAACTAGAAAGATTGCGTGTCTGGCATGCAATCCTAAACA
GAGTTTTCGACAATCGTCTTTTGTTTCCGACTTTGGGCAGACCTAGAAGAATTCTGGACT
GTGGCTATGGAACAGCCAGCTGGGCCGTCGACGTTGCTACACAGAACCCAGGATGCGAGG
TTCTCTTCCTTTTCCTTGCTTTCTAGTGAGATACAAAGTGGCATTATTCTCAAACGTATA
TAATGAAGAACTCGGCCAGTACCAGGCAGATGGCTGAGCACCATCAGAAGTATTGGAATC
GCCCAGACGGTCGAGTGCTAATATTCATGCAGGTTATAGCGATTGATATCTATCCGTTCC
AGCCAGAAACTGTACCCGAAAACTTGTATTTGCAAGTGGACGATCTCAACAACCGGTTTG
TACTCAAAATGCAAAAGGTTGAACAGGTCTAATAACACCTACTAGATTCACTTTTCAAGC
CCACAACTTCGACCTTGTCCACAGTCGATTAATGTCGGGCGCTATACATGTGAACAGATG
GGCTGGGTACCTTCGTGATATGCTTCGTGTGCTTCGACCTGGAGGATGGTGCCAATTGGT
AGAGCTGCATCATAACGCTCAATCAGACAATGGAAGTCTAACAGAGGGTAAGTTCTCTAG
ACAAGTACTACGTGAAGATGATGTATCTGATCGGACAAAACAATAGCCCATGCTCTTAGA
CAATGGAGCACTAGGTACAATGAGAGCCTGAACGGCGTAAAAGATCTTCGTGTCGCACCC
CGACTTCCAGAAATGATGAGAGCTGCAGGGTTTGTCGACATTGAACATAGGATGATTCCC
CTCCACACTTGTGGTGTAAGTTCTCAACTTCATCTCCATTCGAATAATCAAACAACATGA
GGCAATTCCCAAAATAACACCCTCTCAATATTCTATTCGAGAAGAAATACTTCATTACCC
CTTGAAGGCGATGTACGGTAATGCCTAAATGCTAACCCTCATAACTTTACAGTGGTCAAG
CGGTCAGTAAGCAATGATGTAGCGGGGAAGCACACTAATAGCAGGTGCGATAGATGCCAG
AGACTACGATATTGGTACTGCCAACAGAGAAAATGTCCAGCAATTCTTGGGTTCCATTGC
GATTTATCCATTCGCGGAAAGACTAGAGTGATTGTCTCTGCTTCCCCTCCAGAATCAGAT
CTAACCAATGGCAGGATGCCGATCCAAGATGTTCAACTTCTTGTAGCGCAGGCTCGAGTA
GAGGCCGATGACCCATTATTGAAGGTGATTATTGAATCCAGATAACGTAAAAGATAAATG
TTGCTAATCTCCCATTCGCAGGCGTACTTCCCTTTGTATGTATGCATCGGAAGGAAACCT
CGCTCGCGTCGATAGCTCGCAGGCGTTGATGTGTAACTTACAGGCACGTTTGAGCACTCG
TATAGTCTGAAAGGCCCAGGAACTAGATAGCCCAAACTAGAATGTTAGCGGCGGAAGAGG
AAGAAGATTTGATTGCATTCAAGACGCTCGAAAACGGGATTGCAGAGAAATCGATGATGT
TCAGACATGGGAGAAGATTTAAGCACAATGAAGATTGGACGTACCTAATGAGAACATACA
ACGGCCGATCAAGTGGCAGGCTTCATACTGGAAAGGAACACAGAATTGTTGGGTCTTTGT
GTTTGTGAAGTGAGGTTCTTTGGTGTTTTGTGAGGGCTTTAGTGTTTTCTTATCGTGCCG
CGACTTGCTTGTTCTTTCCACAATGAGAAGAAAGAAGTAAGCAGTTCAACTACCTCCTAC
ATTTTCGTCGGCCATCCTTCTCATGAGCTATTTCCAATAACGAAACTCAAAATTTATCTT
CAAAATTTATCTTCCAAATTTATCTTCCAAATTTGTCCCATGTAAAGTCATCCTATCCTG
GGCCAGATTGTAGAATATATGTAATGAAGATGTAATCAAGAAGCTCAGCGTAAGCAGTGA
GTTCCCTGTCAACCCAGCCTTGCTATCCAGCATGATTGGATGAATTATGTTAGAGATCGC
TAGATGGCAAGTGCTTTTAGACGTAAGGTCGGTTCGCAAAAGGGTTACAGAGCCCAAAGC
GTATATAGCCTAGAATAATCGAAGGGATACCGCTGCAACGTAAACAGACATCGCAGAGCC
>a7344a31-c15e-4cfa-9770-3dd4a55b51e9 (mRNA) 2517 residues [Bfab07:593089-595605 - strand] [genomic] name=Bfab07g01580.1
CTAAGGCACTAAGCAAAAAAAAATTATCCAAATTCTTATCGAGAGAACTTCAAGCCGAGT
TCTCGATATCCCCATCAACACCTCCATTACACTTCATTGATACCATTTGCCCATCATGAA
GACCACATGGAAGGATATTCAACCGGTTCCAACCTCCCAAGAGTTTCTCGATATTGTGCT
GAGCAGAACACAACGTCGATTACCTACACAAATTCGTTCTGGTTTTGCCATTACCAGAAT
CAGAGGTACGGAAATCATCTGCCTCCATCGCAACGATTCTTTCAACTAATTCATGTTAGG
TTTCTATACTAGAAAGGTCAAGTTCACAGCTGAGACTTTCTCCGAGAAGCTCTCTCTCAT
TTTGGACGGATTCCCACGACTACAAGATATCCATCCATTCCACAAAGATCTCCTCAACAC
CCTCTACGATGCCGACCATTTCCGTATCGCTCTAGGACAATTGTCAACTGCCAAACATCT
CATTGAAATTGTTTCTCGCGATTACGTTCGACTTCTCAAATATGGTCAATCTCTGTTTCA
ATGTAAACAACTTAAGCGTGCTGCATTGGGACGAATGGCCACTATCTGCAGAAGACTCAA
AGACCCTCTTTTGTATCTCGATCAAGTGCGTCAGCATCTCGGTCGTCTTCCATCCATCGA
CCCAAATACCAGAACACTTTTGATCTGCGGTTATCCCAACGTTGGAAAGTCCAGTTTCTT
GAAGAGTGTTACTAGAGCCGATGTGGATGTTCAACCATATGCCTTCACTACTAAAAGTTT
GTTCGTCGGACATTTCGATTATAAATACCTCAGATTTCAAGCAATTGATACCCCCGGTAT
ATTGGATCATCCTTTGGAAGAGATGAACACCATTGAAATGCAATCTATCACTGCCATTGC
GCATTTGAGATCTGCCATTCTTTACTTCATGGATTTGTCTGAACAGTGCGGTTACACCGT
CCAAGCACAAATGCAACTTTTCCAAAGTATCAAACCTCTCTTCGCTAACAAACTCGTTTT
CATCGTCATTAACAAGATTGATGTCACACGCCCCGAAGACTTGGATCCTGAGACTCAGGC
TCAACTCCAGGCACTCCTCAAGCCTGGTGACGTTGAGTTATTGCAACTCTCGTGTACAAC
CGCCGAGGGGGTTCAAGAAGTTAAGAATGCTGCATGTGAGCGTTTGATCGCTGATCGTGT
TGCTCAGAAGCTCAAGGCTGGTACAAACAGCAGTGGTGCTGTTGGTGGAAGATTGGGCGA
TGTCCTCGCGAGAATTCACGTTGCCAGACCTATGGATGGTGTTGTCCGTGAGGCCTTCAT
TCCAGAAGCTGCCTTGGCCAAGAAGAAGTACGACAAAAGTGATCCAGAGCGCATCAGGCT
TGCTCGTGATATTGAGGAAGAAAATGGTGGAGCTGGTGTTTACAACGTAGACTTGAAGGA
TAAATATATGCTCGAGAACGACGAATGGAAGCACGACAAAATTCCCGAAATCTTCGACGG
AAAGAACGTTTACGATTTCGTGGACCCAGATATCGAGGCCAAGTTGGCCGCTTTGGAAGA
GGAAGAAGAGAAGCTCGAGGCAGAAGGATATTACGATTCTGACGACGATCTCGAGGATGC
TGAAGATGCTGAGATCCGCATGAAGGCTAACCTTATTCGCGAGAAGCGTGAACTCATCAA
GAATGAAGCCAAGATGAAGAAATCTCTCAAGAACCGTGCTCTCATTCCCCGCTCTGCCAC
TCGCAAGAAGCTTTCCGAGATGGAAGACCATCTCGACTCTCTCGGTCACGATACCACATC
TATTGTTGCCCGCGCACGCTCTCAATCTAGAGGCCGTAGCCAAGTACGCAGCCGCGCACA
AACCGAAGATGCAATGGATGTCGATGATCCTGATTATGAAGCCAAGATGCGTGCTAAGAG
CAGAGCAAGAAGCCAGGCCAATAGAAGAGATGATGGTGTCGCTGGAAATGAAGAATCCAG
GACAAAGGCTGAGCGTGCTCAGAAACTCGGCCAGAGAAAGATGAATCGCATGGCCAGACA
AGGTGAAGCCGATAGGCATGTTGCTGGTGTCAGACCAAAGCATTTGGTATGTTACTCCCC
TCAATACCCTATTCACATATTATTCTTCACCGTGTTTCAAAACGGTCTCTTAAGCCTAAC
ATCAAACACCTTGCTAACACATGTGCAATTAGTTCTCCGGCAAACGCAGTATCGGCAAAA
CAAACAGTCGTTAAAATACCCACTGACATTCAAGGCACAATTCTATTTCAAGCTTACTAT
AATGGAATTATGCATGGCGTTTTGGAGATTTTGGGGAGGGTTCTCTTTAGTCATTCACGA
CATAATGTACTCAGATGCAGTATCTGTCAGGTGTTACGTACCAAAAGTAAAATGGGGGGA
TGATACATAGAGATGAATACGAAACATTCTTACAAGATGAGCAATATGAACCTATAGCTT
CATGAATTTCTCAGTGCCAATGTACAATTGAGGAGGAACCTCTTCTAGCATTGAGTC
>1236e899-7503-49de-abfa-2f95a122d9c8 (mRNA) 875 residues [Bfab07:596203-597077 + strand] [genomic] name=Bfab07g01590.1
AAAATTATTTCCCCTCCATGACATAGACATTGCGATAGTTCGAATTCCAAGACACACAAG
AAATACTCGAGTTCCACTCACACAAGAAACTTCGAACCTCACCCATTCCCATTTCACACC
TCTACACACATAGCCATCATGTCCACCCTCTCTCCATACAAAGCCGAATTTCTCAAAGCC
GCAATCGATGGCGGGGTCCTCAAGTTCGGCAGCTTCGAATTGAAATCGAAACGAATCTCT
CCTTACTTTTTCAACGCCGGCGATTTCTACCGCGCAGATCTCCTCCGTGCCATTTCTACT
GCTTATGCGAAGGCTATTATCGAGGCACAAGAAGCAAACATTCTGGACTTCGATATTGTG
TTTGGACCTGCATACAAGGGTATTCCACTTGCGACAGCTACCGTGGACAAGTTGGCCGAT
TTGGACTCAAAATACAATACTATGTGTTATTCTTTCGACAGAAAGGAAGCAAAGGATCAC
GGAGAGGGAGGAAATATCGTAGGAGCTCCTTTGAAGGGAAAGAGAGTTTTGATTGTGGAT
GATGTTGTGACTGCTGGAACTGCAAAGAGGGAGGCTATTGATAAGATTCGCAAGGAGGGT
GGTATTGTAGCTGGTATTTTGGTAGCATTGGATCGCATGGAAAAATTGCCTTCGCCAACT
GGTGATGATAGCGCACCAATGCCAAGTGCGATTGGCGAGATCAGAAAAGAATACGGTATT
CCGGTTTTGTCTATCTTGACATTGGATGATATCATTGGAGGTCTCAGTGGCATCGCATCA
GAGGAAAATGTCAAGAATATGGAAGAATACAGGGCTAAGTACAAGGCCAGCGATTAATAG
ATCCGATACCCTGTCCACAAACCATGATACCCGTA
>cdff457a-a4e0-4a12-889d-1136fea042e3 (mRNA) 1451 residues [Bfab07:597064-598514 - strand] [genomic] name=Bfab07g01600.1
AGGCAGCCTTGTTGGCACATGATCAGACCATACGCCGTTTGTTCTCTGGTGCCTTCTCTT
TCGGTCTTGGTGGCGCGGGTGCTCACTCTCTACTATCTTCTCATTCGACTTCGCTTCCAT
CAATTTCGCAATTGCTCCATACAATCCGGTGAATGGACTGCTCGTGCGGATCCCATCGAT
CTCCAAATCTCATAGAAGCAACATTTCATATTCCATATTTCTGCCCGTGGGGACTTAGGT
AATCGCTCAAATCTAGAACCAATTCACAATCCCTCTCCATAAGGCTACTAGCATTTCTCG
GGTCCCAACCTAATCTAGAAAGTTGAAATTATGTCGGAAAACGAACAACGTGAAGGAACA
CCTCAATCACCCATTTTATCAGAGAGTCCCAATCCCGTAACCCCACGACAATTCGACGAC
CAGCAAGAACCTCAAAGAAATTTTGTAATCATACCTGAAGACCAGCGAATCAAAAACTTC
CATATGTATTCCAATTCTCATCGGGATCTTCACCCGTATACTCGTCCTCTGACTGTCTCC
GATCTGGAGTCTGTCTTTGCCCTCGAGAATATCGCCTTCGAAGATCCAAACGAGAGAGCA
TCTAGAGAAAAGGTTGGTCATCTATATCTCAATTCCATACGCGTCTAGCGAATTTGACGT
GGCTAACCTTCCACAAGCTAAGGTATAGACTTACCAGATGTGGTGAGCTATGCTTGGGTA
TCTTCTGCACCATGATCCCCGGCTCCGATCCCAAGATCGAGACTCTTGCCACAGGACATC
CTGTTGAAACCAGTCGAAGGAATGGAGCGATTAGTGTTCTCATCGGTCATGTCATTGCAG
CCAAGACACATGACACGACAGCTTCGGATGCATCCATGGGAGTTCCTGAAGGGTGGGAAG
CTACTAAACCTCCACGTACAAATGTTGGCCATCAAGAAGATGGCCGGACTATAGTACTTC
ACTCGGTTGCAATTCTGCCGGCATTTCAAGGACGAGGTTTGGGGAGAGTTCTCATGGCTG
CGTACATGCAACAAATGAATGGTGCTGGAATTGCTGATAGATTGGCTCTTATCGCGCATG
ATGTAAGTTTGCTCTGACTCGAATTTTGCATCGTGTTCACATATGTTATTTTGACTGACA
TTCATTCAAGCATAAAGTGAATTTCTACAAGATGCTTGGCTTTTTAGAGAAGGGTAAAAG
CGATGCTCAATTTGGTGGCGGCGGCTGGTATGATATGGTAAGTTGCAAATCTGATCAGTC
TTGAATAGACACTGACATATGGCCAGATTTATGAACTTAAGACTCCCGAGGCACGAACAG
CTTATGGTTAGAGAGAGATACCCTTTACAGTTTTGGTTCACACATGGTTCATTGTCATTT
GGAAAGGGGATCACACAGGAGTTTCAAACATTAGTGAAGTGCTGGTATATTTGTTCGTAC
GGGTATCATGG
>53a1111c-3a2d-491e-ad32-4ad27c88fffe (mRNA) 1892 residues [Bfab07:599813-601704 + strand] [genomic] name=Bfab07g01610.1
CCCAAGCTCTGACCGAAATAGTTAATAACCCCTCTACCATCACCATCACCATTACAATTA
CAATTTCAACTTCAAACTATCAATCTTTTCTATACGTTCCACTGCTTCTCTTGAGATCCC
AGATTTTCTAATATACAGAATAGCCTCTGCTTTCTAATATCTTCTAATATTGAAAAGTAC
AATACTTGCTACTGCTACAGAAGTTCTACCCGTGACATAATCTTCAAAATGTTCGTTCCA
GATCCCGAAAGCCGTGCTTGATTTGTGAGCTGAAGCTGATAATTTCAAACGTAGGCGTAT
CACTTTGACCATTACTGCTCCTACAGACGATGATGCAGATCTTATATCTCTCGAAATACC
CCAAGATACCACGGTGGGCACTTTGAAGGAATCCGTCCAAGCCGAATCTCGCATCCCTAA
GAGAGATCAACATCTATACCACAATGGACAACTACTACACGATGACAACAAGACCATGGA
GCAACTGCAGATTGGTGATGGAGAGATGCTTGCTTTGCACGTTAGGGAATACAGAGATCC
TCCTGCTGCCACCGCACAACGAACTTCACAACCTTCTCGCGCACCTCAAGGCAGAGGAGG
CCAACAACAGCCAGATCCAGAGACAATCAGATTACAGTTGATAGGCAATGCGGAAATGAG
ACGAGAGGTCGCTCGTCAAAATCCGGAACTGGCAGCAGCTGCTGATAGTCCAGAACGATT
TGCAGCAGTACTGAACCAAATGCGAAGCCGGGAAGCAGGTGAGGAGGCTAGACGGAGACA
GCAAATTGCGGATCTAAATGCCGACCCTTTTGATGTTGATGCGCAAATGAGGATTGCGGA
GATGATCCGTGAGCAACGAGTGCAGGAGAACTTGCAAAATGCTATTGAGCACAATCCCGA
AGGTAGACATGAGATACCCCATCCTACCTGCGCCAAGCTTCTAATCTGATCAATCAATAG
TATTCGGTCGTGTTCATATGTTATACATCGATGTCGAGGTCAACGGACATAAAGTTAAAG
CGTTCGTCGATTCCGGTGCCCAAGCTACCATCATGTCTCCCAAATGTGCTGAAGATTGTG
GTATAATGCGACTGGTCGACAAACGTTTCGCAGGTATCGCACGAGGAGTTGGTACTGCCG
CTATTCTTGGTCGAGTTCATTCCGCGCAGATTAAAATCGGAAGCATGTTTCTTCCTTGCA
GCTTCACTGTCATGGAAGGCAAAGATGTCGATTTGCTTTTGGGCTTGGACATGTTAAAGA
GACATCAAGCTTGCATAGATCTGTCCAAGGATAAGCTCATCATTCAAGGTGTCGAGGTTA
GCTTTTTGGGAGAGGCGGATATTCCTAAAAATATGGAGGATGAGAGGGCAGAGGAACCAC
AGCTCGAGGGACCAGGAGGAACAACCATTGGAGCAAAATCTGGAGCAGTTTCAGGGCCTT
CGACAGGGCAGCAAGCACCTCAGAGCGCATCATCAGCACCAGCTACTTCTGCTTCATCGG
CTCCACCACCACAGCAGCAGCAACCATCGTTTCCGGCAGAAAACATAGATCAACTTGTAG
CTTTGGGATTCTCGCGCGATGAAGCTGTCAATGCCTTGGCAGCTTGTGGGGGTGATGTTC
AGTATGCAGCTGGTCTCCTGTTCCAAGGATAAAGTGGGGTTAGGTCGGATTGGATGCGCT
AGGTTATGATATAATACAGAGTGCATTCAGAAAATAATACGTTCAGAGGTCGAGCTTGGC
GTCACATAGCAAGACGGAAAGAATGAGAGGCAGAAAGGAACGAAGTCAGAGGACACAGGA
CTCGATCTTCTTGATGACGTGGTCTGACGATAAAACCATAAATAGCAGAGCCGGCGTTAG
CATAGCAGATGTGTGGCTTGGTGCATATGATT
>2faf188e-796c-4212-bca0-34c515493e07 (mRNA) 1911 residues [Bfab07:601702-603612 - strand] [genomic] name=Bfab07g01620.1
GAAGTACTTGATCCAACTAGGTAGGTAGGGAATAATATATCTGACATATCAAACAATTGA
GTTTCGGTCAATCGATCATCATTCGGTTCGGTTAATAAGCTCACTCCCCAGAAGAATGCG
CTAGCTGGAGCAGAAATGTGGGGCCAAAATTCATCGTCGTTATCGAGTTTATCGCAGGAG
AAAAAAAAATGTCTAGAATTTAACTCAACTTCCAACCTTACAACTATCAATCCACACAGC
ATTAAGCAAGCATTGCCATTTTATCGCAATGTTCGCGGTTCCAGGATGGTCAGTCTCATC
GAGTCTGTTAAAAACTCAAAAAGCGGAGCCTGTCGCTGCAGCTTCAAAGGCTGATGAAGA
AGGAGCGCTTGCCGAGACGAAATCGAGCAAGAAACGCAAACGCGCAAAGAATCCAGATGT
TAACGCAGCAAACTTGTCGGAACTTTGGGATTCGGTCATTGAAGGCAAACCAAAAGCAAA
GAAAGTAAAGAATTCCGAAAAGGATGGAGAAACAAAAGAGAAAAAAGAGAAGGTAGCCAA
GGAAGTCACCACAGACGAGGTTGAGAGCAAACCTGCAAACCTTTCAAATGAATCGACAGA
AGTTTCGGAATCTAAAAAAGAAAAGAAACAAAAGAAAAATAAGAAGGATAAGAAGGACAA
GGACTCAAAACCATCCGATAATGATCAATCTACGAAAGACGACACCTCGAGCAAAGCTCC
TCCACCTCCTAAGCCCGCTGCGAAATTAACACCACTTCAAGCTTCTATGCGTCAAAAGCT
CATCTCCGCCCGCTTCCGTCACCTCAATCAATCTCTATATACTACTCCGTCCGCCGAATC
CCTCGCCACCTTTCAACAAAACCCCGAAATGTTCACCGAGTACCACGAAGGCTTCCGCCG
TCAAGTAGAAGTCTGGCCCGAAAACCCCGTCGACGGCTACTCTCTCCAAATTCGCCAGCG
CGGTAAACTCAGACGAGATATGCGAGGCCAGCCCGCCCAAGAAAAGACTGATCTCACTCC
ATTACCAAGAACAGACGGCACATGTCGCATTGCTGATCTGGGGTGCGGTGACGCAGCTCT
CTCCACAGGTCTCCAAAAAGATCTCAAAAAACTCAACCTTAAGATTCACAGTTTCGATCT
CCAAAGCCCCAGCCCCCTTGTCACTCGCGCGGATATCGCGAATCTTCCCCTCGAAGACGG
AAGTATCGATATTGCCATCTTCTGCCTGGCACTCATGGGAACCAATTGGATCGACTTCAT
CGAAGAAGCCTTCCGCATTCTCCGCTGGAAAGGTGAACTCTGGATCGCCGAAATCAAATC
CCGCTTCGGTCGCGTAGGAGGAAACAACAAGAAAGTCGTCGAGCACAGCGTAGGCCACCG
CAAAAAGAACCAACCCGTCAACAAAAAAGCCATCAAAGCCGCCGACGACGAGGAAAACGA
GGCGGATCTCATGGTGCACGTTGACGGCAACGAAGACAACAAGCAGGAAACCGACGTATC
GGCTTTCGTTGAGGTTCTGAAGAAGCGAGGATTTGTTCTGCAAACGGAGAAATCGGTCGA
TTTGAGTAACAAGATGTTTGTCAAGATGCATTTTGTCAAGGGTGCGACGCCTATCAAGGG
CAAGTGTGTACCAGTGCCTAAGGGTATGCCAGAAGGAGAGACATGGAAGAAGAAGCCCAA
GGCTAAGTTCTTGGATGAGCCCGAAGATGTACCTGTTTCCAGCGAGGCGTCAGTTCTAAA
ACCTTGCGTCTATAAATTGAGATAGGGAAAAGCTAGCATGAGTTAGTGGGGGAGCGTACT
GTAATTACAATGGAAATGATGGGCATATGTCTAGCACTATCTTGGGGATTAGATTCGCCC
ATTTCATAATTTCAAATCACAAAAGAGCAAATATACAATGAAGAAGAAAAT
>e24197be-1d9e-4dc5-89ce-3f56de099c3b (mRNA) 4600 residues [Bfab07:605108-609707 + strand] [genomic] name=Bfab07g01630.1
CTTTTCTTCCACATCCAAATTGGATCATCAACATTGCCATCGCCATCATCATTGCCATCA
TCATTGCCATCACCGTCGCCATCGCCACTGTCGTTATTACCTCGCTCTCGTTGTCGCCGT
TGAATGATATCATTTAGACAATCGATAACACCCACCTACCTTACCTAGCTGAGCAACCAC
GTTTTACCTTGGAACTTGGAATCCCATCTTATTCAGCCCTTAACGATTTTGGGTTAATCC
CGCCTTGAATCACCCAAACACTGGTATCACAGCAGACTTCAACGCAGAACTAGCTATCCT
TCATTGGGCATGACACATTTGAACCGAAGCTGCAAATAACAATGATTTACATCCCTTAGG
ATACACAAATTGGTTATTGTTGTTGATAATTTCTCGTGCTGGCAATATCGCCGACTTGCT
CGATTATTGTAATATATATTATGGTCTCCTGAGTTCACGGGTGAACCTACCGAAAATTGA
CGTTTCCCAAGGTTACACGAGTATTACCATGATGGAATCATGAGGTCCGAGTCTTGAACT
GTCCATTTAAAGAGGGGAGATATCACTACGCTTGAACCAAAACCCACGGTCATTTTCAAT
ATGAATCTAGAGAAATCGCAGGATCTTGAAAACGAGGAGGAGGAGGAAGAAGAAAGTCTC
GCAGGTGTAAGAAAGCCTGGTTCCAAGGCTCAGGGTAGGAAACGCACGAAAACGGGATGT
TTAAGTGAGTCTACACCGCATCATAGTCGAGGCTATCTTTGAAATGACTGACATATCTAC
CTTGCTCTTAGCATGTAGAAAACGACGGATCAAGTGTGGAGAGGAAAAGCCAACATGTCA
AAATTGTTCCAAATCCAAAAGGCACTGTGAGGGCTACATTCAGCGAGTTGTGTTCAAGGA
TCCCTTAAGTGCAACCCGGGGCCCATTTGCCAATTCATCCCAGACAACTTTCTCGTCGGG
[truncated: 27,308,280 more chars]
