# Supplementary material for: Genome Comparisons between Botrytis fabae and the Closely Related Gray Mold Fungus Botrytis cinerea Reveal Possible Explanations for Their Contrasting Host Ranges
Source: J Fungi (Basel). 2024 Mar 14;10(3):216. doi: 10.3390/jof10030216 (PMC10971195; doi:10.3390/jof10030216)
Supplement: Supplementary file 1 [file jof-10-00216-s001.zip › BfabG12_proteins.txt]

>4361325e-5b89-4a03-816b-d788dda0b9c5 (mRNA) 355 residues [BFAB_07:18203-20210 - strand] [peptide] name=Bfab07g00040.1
MNPLPHNQSSLECGIRKIIATGTIPAPNAYWQPNFTTSITPINCWSHNDEHQQIPLYTAL
AAGCIAIEADCFIPSYYSSSRFLTSLLSYFTSSSKLVVSENDLLVGHETSELNPAKTLSS
LYLDPLLEILTQQNKAAGNPEKKVGVWNENPHLSLHLTVDYKSISSGHDGISILYSLLEP
LRTAGFLTHYDSATEKLISGPITIVGTGDADFELICGYESIYIFKDARFFNFLSSQNPFN
SLYVSGNISKSIGRFSKSKGPTKKQVRIIRNECKEVRERGLIPRYWGAPDSEDWWRILVE
SGVEVLSCDDLDRGGEWLRGCIINGVGVGASWKDDIKESDVEGWDEGLFGRCIVS
>66a144fa-907c-4eb2-8f61-99d10b82f3c5 (mRNA) 701 residues [BFAB_07:20923-23850 - strand] [peptide] name=Bfab07g00050.1
MSYSDNISNAENNPIDKWNEDNSDELSPTDGYFNSNQIPQNMIPDPTLSQEEDKSKAQDA
KGNLPRGGNIPSTLQISSHTNASSHVIEHPRHSQTSSNSLLASSYHRIDNSFPENQSFLD
QPPPAYIASLESSPVSAQGQHTLMHYNTFSQDRLEEGLPREPQSMGGPAGNQDIDERIPL
LLDRTPKNISFRRDIITKALGLGLALTIAAVIIGAILTEKSNPDSNMGEGPAFPDPIHDG
GSYCQHISKSDQTTFEIIDAAGIVVIQDFYQHNSAHYGPEVKTAGEVHIRNLPNNSTGGK
AHFTVEVKLSHPELSVLKTLNELDGSLKISTPRFANLGIHENPCISLEITAWIPKNAEFF
KVFFDLATLSIRIFDDVNIKVVKDAMLKTISGHVRFPNDPASSTSHTSLSTENELRTNFD
FDSRHIVVETVSGRIEGIYPLYDLLKVSSQSGSIGIEVQPKPVLESTPAPATLDINISSG
NIDVSSPVKYPKITYPREYITHVKSISGAIKGHFFVGSTGNFDTVSGMIQLVVRPVLSAT
SDDDDDESGNEFSTHSVSGNTHVTLLDPLFTLLSINGKARNSVIESDPDSHDSSYTPALV
DLSSSSFQAYNSKLRTVYSTHRTSSGSIEAYYPLAWIGNIEAKTISGRIELEGKGIDIVE
RHDGWGYKNTKARKGVERDEDGSSVRLETVNAAIALRISES
>99b43857-2ff8-4ab2-8720-87fa21181dd9 (mRNA) 872 residues [BFAB_07:24622-28413 + strand] [peptide] name=Bfab07g00060.1
MRAFHCVKVLLSLYFSWNVNASPTLGTTPTLSARNSASTACGDIVNNEDTVLFNATLAFE
CLTSVPFNPAVASRFISYYNDTLQFQSTLEYLKSPPPSYQQPAVDLIAGLNRIQSAINEG
IFSNQYEFEAALQTLVYAAHDGHVDILAGALSAFSFASPRDLVSLSLDGQQIPKVYLADD
LFDSDYFTTFQPSAIKSINGRDATTYLLDFASVNSVGTLEDHSDWNQLMLSAAQDIQGYF
NTFSGGATFYPGNSITFLLENGTSWTENYLAIYDTPGPTGPLQTGGDFYNFFVLGFYPAS
YDPYTDDSDDDSEDSSSDDSSTAVTSTTSATPTLTGWESPAYPEIPDVAQEDLGTYGDGV
VSGYFLNSTSVSVLSIPSFDVDGDAVFSFQQTISQFINQTQAAGLKKVVIDLQQNYGGQS
LLAIDTFKQFFPNIDPFAGSRMRAHASADVLGKTLTPYWDGLAENDETKYVLAADEWVIT
NRINADTNRNFTNWQEFFGPNQYNGDNFTKIARYNLSNPIFDASGTGLDISDDAFAVYGY
DANPAPSGAQPPFAAEDIIILSDGICHSSCALLIEMFRHEAGVRVVVVGGTPTTGPMQAP
AGSRGARDYDTFTLDANIDFTQHLLQNQSSTDAIFLPNRTEQLSVFVYFADINLRDQVRK
NEEIPLQFAYEAADCRIYYTPQTVYNYTNLWQYAADAIWKNSSLCVNDSTGYSSTSQNST
NFVGPSGGAEKTSTNITDYLASLTTSPIANFILQGLNDGLPAANEGASRNAPASTKVIKC
TTDEDCLNGKLCVNIPSCSGGKAISQCLRKCPAAGRLCPSTKTKCTPHSTDGKLGNQRLH
KNICPPAGIAAKCESQNQLKTVNLNQCPDCSK
>5d96d8d7-c6f5-45ee-80f2-37de8f9770e9 (mRNA) 707 residues [BFAB_07:28519-31112 + strand] [peptide] name=Bfab07g00070.1
MPSNDGKIYPSILPSPLIRLLSLDSGSDEPIRVTLHEVNLQNAPAYDCLSYTWSDPLYHA
LSPEEEIHLSNDKREHPILCNGQNLLITESLLLALKEFSKNNGEDNRKNWKDGYFKRAKF
MWIDGICINQDSIEERNIQVGMMGEIYTKCSQVIIWLGVSDFHSPYAIEVINLLSKIPQE
NYTGLRITDLEDWDIYPKLGIEEVETWKWLEYAAFLQRTWFSRIWVVQEAFLPRNIVVVC
GSDVIEWGNITACAKVLRETGLGTLLMELLIETVDDVEGTVYVNNTLNNQSIFQSMRDMA
TLGSEEMGKVLDLEKLLYYSRFFDATNPKDKIYAIRGIWEKGGKTIPLDMTPDYQRDPTV
ASVYTRAALEVIFETKDLNILSLVEDYTLATQKPNSVRAIGNLPSWVPDFNSSSNPQPLA
GNPRPKLGSERWNAARGIPFEVPILPALESRHLLPITGYRIDVISESAANQAELMGNNFG
FDTVLELLASYPDQKYPHVDDNAETHFEAFWRTLIKDTFQKLPARENARNAFRYFITVRV
SELSIAYNYALLKQTSDLPKLQKLYEKFKQLINDLSKHRLNESLIPTWEDLGKLIVIAAN
EDLTDPEKTKLDKDYGDFYESFRIAYAGRRMFRTEKGYWGIAAQTLDVDNEDEIWVIAGS
KVPMVLRPVRGSNSVNRELIGEAYVHGIMNGEVLKLPRGGLKSLFLE
>6228f854-dbaa-4830-82ae-47d2f1c0eab1 (mRNA) 346 residues [BFAB_07:43960-45318 - strand] [peptide] name=Bfab07g00090.1
MSLQKQVFLIGPGYIGGEILDLLLQEGCYEITVLVRRQAAAEELAKLGVRTVIGSLSDSN
IIARQASLSDITIHTATADDLVSVEAAIEGITQHVQSGRTAIYIHTSGASLLGDDSKGSF
ATEVFYEDDRPEQIDAVSDEAPHRKIDLAIVNANKILGPKARLAIMSPPLIYGINSREKR
LSIQLPTLARFAIKHGYAGHIGKGLSKWSQIHVRDLARGYMSLLHTLEISDLDIENPYYF
CNNGEDLFWGECASEIGKILYQEGKIKSPETKIIPLDSYNDLFGPYSSAVIGSNSLNRAN
RLRKLGWEAREQKTLLSLRDELMMILQEEKPFLGYSAPVASGSNRD
>86dd68f2-2895-4396-be3b-d73a697b0ae3 (mRNA) 638 residues [BFAB_07:45606-48256 - strand] [peptide] name=Bfab07g00100.1
MDFIGFPKHKYATDKPFIYTILPSPTSIRLLEIKSKLWCRTKYSFHVVELTEAPKFDVVS
HSRRDLVPRNHIILCDNKILRICGDTKNAIKAGREVVSKTYGKMKTRYVWIDSMCINPED
AMDRTAQVSMMPEILKKARSVIIGLGKRDAFTSDALKALKILSSVPHDEWSNLVSLDWEC
QDQYFQRLNIAPLQLRSWLSLIAFFNRPWFSGIWAVQEVTIGNDVILACGKEMIPWETVS
KTLSFLTHTGWYTKLHTSHLIKFPGNDLKSRRLKKHQILMNSEVGLKMAVIQLQSTRAGS
ETNKQLPLFRYLLRAHRYCEVSDKRDIIYALLGLSRKDGLPFTKFPNFLSTNYEMATQDI
YTNVARVLLRCYGLGILSDVQDSIASIPNLPTWVPDYSIARRPLPLSMRGDCIWSACGDM
KWNQNFSETETRSLILQGMLLDTVCEKVKQQNKSLHPMEFLDGIYEVATRLDPIYPLSMG
GKFQSSREAVWRTILADTYRKEHPAPQKCEELVAHYQEWVRNGVRNGSQATNSMQRLSIT
ERQPRKYGKVDFSSLEKEIEAANDARTLFRTRKGYLGIGAQSLRPSDEIWVLAGASIPFI
LRRGEDESHELVGEVYLHGVMHGEALGWGHEMRNVLLK
>8f865ff4-b39e-4011-951c-7ba3043a440b (mRNA) 462 residues [BFAB_07:49224-52008 - strand] [peptide] name=Bfab07g00110.1
MALILCLAHYCDTHGPTPVMVTEALPVGCTSCPEKEEPIPRRPSTSKSFKSSDPSSNINA
HTSHRTNSIVSEPDVAASRPALHVNSSPSNAPNTAGSAGETPPQSPRAPALQNTQNTTNQ
LRRDSSFRKTYPSEKPGPCENCALTLPKKTKEEIPTSPKPSGTGKLDNGPILRTRKPYER
IAGQSTPPKSASSDSDDSECAIQKEERGEQHQARRLSVKRSDTSSTYTTREFLSHNHFVD
YTSTHEPLQPTSFSIIRQSCLRTLSCETLPPSSNPTPNSTPSSPFISSFSSHLTSSTTTS
SAGPIFFGDPMAGYTTAYIFRIPDPSARGRRRVYALIALSTQKERMAMRTFSFLDAAFRE
LADWIARLADEELARSESALQSPRAGDEKNGNGISGGPFGGGGTTTTPTSSFLRGGNRGP
DSRMAGASLKGRGLAELVGLPDFFIELHSRFVRLLAEIERPR
>450ef304-5674-4c0f-8ad6-9c891991d8be (mRNA) 538 residues [BFAB_07:54527-57577 - strand] [peptide] name=Bfab07g00120.1
MADELATKLAATQINDNSSPDNWKAGLNIPAKDTRQQTEDVTATKGLEFEDFSIKRELLM
GIFEMGYEKPSPIQEEAIPVALTGRDILARAKNGTGKTAAFVIPALERINPKNTKVQCLI
LVPTRELALQTSQVCKTLGQHLGINVMVTTGGTTLRDDILRLQEPVHIIVGTPGRILDLA
GKNVADLSECNMFVMDEADKLLSPEFTIVIEQLLQFHPKDRQIMLFSATFPMTVKDFSDK
NMADPYEINLMDELTLRGITQFYAFVEEKEKVHCLNTLFSKLQINQSIIFCNSTNRVELL
AKKITELGYSCFYSHARMIQANRNRVFHDFRNGVCRNLVCSDLLTRGIDIQAVNVVINFD
FPKNAETYLHRIGRSGRFGHLGLAINLISWEDRFNLYNIERELGTEIAPIPQIIPKNLYV
YETPENIPRPVSNFQTNTRQASGPGRDQQQPTQHSGNQRTGGQYNNYNNGRQSGPGQNQS
QGQGQVQGQGPRQNQGQRQNYSRGRGGFGGGRGGGQGPRQNGYDNSRGGRGQGPPPAQ
>21457fe8-a378-4530-b641-0300b4dc96e3 (mRNA) 527 residues [BFAB_07:57850-60176 - strand] [peptide] name=Bfab07g00130.1
MPHSISTGEPSIQSQENMADSEENRDDAQISQEAENASANTQVAELNDDEDITMADAGVQ
SEAMPQAAAKTETNLSDLFGDSESDDEFPSTNAKEEKVSSSPEAPASTVNIGPTSRSSDP
EVMRSFYQRLFPWRHLFQWLNHSPTPSTDFGHREFAFTLQNDAYLRYQAFPTSDLLRKDV
LRLMPSRFEIGPVYSTNPRDRKTLRKSSAFRPIAKELCFDIDLTDYDEIRTCCDKANICN
KCWQFITMAIKVVDVALRDDFGFKHIMWVYSGRRGAHAWVCDKKARQMDDQKRRAIAGYL
EVIRGGSQTAKKVNVKRPLHPHVLRSLDILKGHFQNDILHDQDPWEEDDKIDKLLQLLPD
RTLNESLRKKWSSAPGRSSTSKWADIDALAKSTKGLDPRALLEAKQDIVLEYTYPRLDIE
VSKHLNHLLKSPFVVHPGTGRVCVPIDTRHVGDFDPLAVPTVTELLGEIDQWTPPEAGDL
DGKSIQDWEKTSLKPYVDYFRSFVATLMKDESDIKIKRERDTDAMAF
>f9761217-99dc-428c-94dc-5f9bf797bdef (mRNA) 581 residues [BFAB_07:63987-67059 - strand] [peptide] name=Bfab07g00150.1
MSLTTRMNGYFREQSQRARGLRLLKPSTTLPRGVLGGPRRIIDPDSGLVSQETTSRELQV
SDYHWDSQFEELLEANWEESDKDQELTAEEAITAQFKRRKPRVPRLMQLAVDSIVKNISS
ITYESIKNMPSIQLEFLWRELSKRCVNSFNTWKAFSKVLDRQEGAILNQFRYSGSVEEPV
PSLSVYTKPLKSLTFDFLVHLSITTAFSTSNMVELSTLSNLVALEISNPKHGKHVRTAGK
QFDTSFGDRVIKTWGEVAATGKGFKVLRILKLRNFLEITNNCFQYLNDFPALAVFDVVDC
GFNGLAQLSAEKLGWEVHPDGALLEILQSDCVKHIMALRASLGLPARPIRRSTAKPLWDK
AKVTMIPRADVPTLLTGGTSSAARNSAYLHAEEQVRAMERTPAGRAKLKRTGLSHFEAVD
YISRKEYRELETWEFRTLTSLNRISELRNDEDLRAAGLKVDEFVPMVSGEFISSIPFVSL
RLGPELSYAPSKADLHQPFYDGGMSDRSLKYTSKNLGVGAKGYVYTRIAIPVARTRIREQ
SEEIMGSDASGSGSRPSKRRKVRGDKRQQIGDLLAGVMGVI
>027e9599-3a29-4a98-b497-956a07818a92 (mRNA) 393 residues [BFAB_07:67987-70271 - strand] [peptide] name=Bfab07g00160.1
MGGGHGYRAVAYFVNWAIYGRKHFPQELPAEKLTHILYAFANVRPDSGEVYMTDGWADTD
IHFEGDSWNDVGTNLYGCLKQLNILKSRNRSLKILLSIGGWTYSSNFAQPASTESGRRKF
AESAVDLIRNLGFDGIDIDWEYPKNAEEARDYVLLLRECREAMDRYSNTLPTPHHFELTV
ACPAGPQNYNNMDIYGMNQYLDFWNLMAYDYAGSWDGVAGHQANVLASHNNPSSTPYNTE
HAVRAYEAKGVRSHKIVLGMPIYGRAFQGTEGLGRPFNGVGEGTWENGVHDFKKLPQEGA
REFVDEETCASYSYNENTKTLISYDTVEVGRRKAHYIKQRGLGGAMWWESSADHPEPERS
LIHNVVNVLGILEESPNCIQYPGSKYENLRNGF
>85a67274-06f8-44be-b2f9-cc3e23fc6549 (mRNA) 318 residues [BFAB_07:70539-71897 - strand] [peptide] name=Bfab07g00170.1
MNYSMLKKSGILISSCSNLQCYYAFPRTSSTSLSHSLFTSRNHQPQHRSQRQHYAIVSDG
RSTNQHGGLQWPEMTSAYAVPTPYQIFNQKKGSPYSKRRFYELVKLYHPDKHGIDTSDGL
DYDTKLSRYRLIIAANDILSDPVKRSAYDTYGAGWNGRPEVLDPRDKHGDNHGWAGPGGP
SQNATWEDWEKWYSRDVKGEQKPQFVSNGAFVLLIAIFVAVGGLGQLTRLDNYSAKFLEQ
RDTLHDKMSKDLRQRRKETRYTFGSREERIHSFLRQRQDPKEETYRKLLPNPEVCSSEDI
KGRSMVVYQSPKNMPKER
>e65f90ae-9b84-42f9-ae06-35240aef7c69 (mRNA) 779 residues [BFAB_07:77639-82013 + strand] [peptide] name=Bfab07g00180.1
MSVMLQTPSRASTASSSSFQPVSRQNTMSSHDGARSARQSKRYSMTTLYLSMSANEKDLE
IEDDLAKAQKVLRELKSKISSQSKKNFVLEKDVRYLDSRIALLIQNRMALEEQNEVASHL
EDATDLQEGFFPNDEKTQKYGNLLFLLQSEPRHIAHLCRLVTMAEIDSLLQTVMFTIYGN
QYESREEHLLLTMFQSVLTYQFDNTPEYSSLLRANTPVSRMMTTYTRRGPGQSYLKTVLA
DRINGLIELKDLDLEINPLKVYETMIAQIELETGGLPASLPRGVTAEQAADNTQVQAIIE
PRLTMLMEIANGFLTTIIDGLEETPYGIRWICKQIRSLTKRKYPDANDQVICTLIGGFFF
LRFINPAIVTPKSYMLIDGTPADRPRRTLTLIAKMLQNLANKPSYAKEPYMAKLQPFIQH
NKERVNKFMLDLCEVQDFYESLEMDNYVALSKKDLELSITLNEVYATHALLDKHTAELNR
DENSHLAVILADLGPAPAQLPRKDNRAINLPLFSKWETAIDDLTAALDITQEEVFFMEAK
STFVQIMRSIPSNSAVARRPLRLERVADAAGQYRNDAVMVRKGIRAMELLSQLQELGVID
KSDQFSLLRDEVEQELQHLGSLKDGVILETQKLDQVFKTIRDHNTYLVGQLETYKSYLHN
VRSQSEGTKRKQQKHQVLGPYKFTHGELEKQGVIQKSNVPDNRRANIYFNFTSPLPGTFV
ISLHYKGRNRGLLELDLKLDDLLEMQKDNQEDLDLEYVQFNVPKVLALLNKRFARKKGW
>417d6c7b-5e7d-4547-acf2-45636d0ef375 (mRNA) 184 residues [BFAB_07:82142-82979 - strand] [peptide] name=Bfab07g00185.1
MTRVRREWCREHSTCHLLILLSNLNTLPTPVTEMRASLRSGTSSKIAVVHKSRAELSNAS
RVTINATYEAGDLLSSKTTSSTVVTGALIGLSTNLESIVSPSSNSAPSISSKSPHPSPLY
ECCLQELPTTILISPDDSVETIILSIGKVEYVFDIRDMDLRYLNIKPTKKTMYRKVRSDR
KVKN
>cb150335-c1c3-4940-ab6e-098533742c36 (mRNA) 130 residues [BFAB_07:83161-83867 - strand] [peptide] name=Bfab07g00190.1
MNNGNRSAVTFHDDQELSLTSVERGPLFITIDGYRAFDYPSVVDDEDDPPIGDPALEELI
VDDPPAEVPLLQLRPHTQSQSSRYPHIILLIQIIELIALIGMVFYLLFNHFPPKPVPTPT
RPPPSTPGGW
>18db555d-1fc9-4f62-a3e0-b0b3e8462367 (mRNA) 180 residues [BFAB_07:84016-85170 + strand] [peptide] name=Bfab07g00200.1
MPRFIKFQIDWAIHAKLNNDILEQSTHGKGETPEGCTCDICYERFCIASVDSEDAAECLP
YFPVSKILEPSQLCDSDSKEIEDIWEFPDVDKCKCHCHRCHIHQFKLFCKEYKELVKEYS
KLMVDWCLTLKSSQQLQDLQTLRERHHQFRKRLSDAGFRPRSQRCGKVDFSSLKPSEGWC
>56b2a126-e9ef-4770-9275-f5f34600a5fd (mRNA) 485 residues [BFAB_07:85330-87233 + strand] [peptide] name=Bfab07g00210.1
MLFVFRNSARRSLPHHTAFARPWINSLPTRLSVRHSPSNLTLCLPTMDRGIKRKAKTTSE
SPKKTIKIDGYCSTPVRRASTGEEIWPAPRDQLESAYKFVRECATAQKPTLIVPDKDADG
LSSGVIMYRTLIKLGLEEKNLSVHLVRKGSNIHEEYERKAMSEMKPSYVIVLDQGSRGGL
PVIDDEGAKCMIIDHHLSDDFPKNATVVSGCHCPPIPTTALMTYEICKELHPDIAQECGY
LCAIGTHGDLGNTIKWIPPFPDMKETFKTHTKKLINDCVSLINAPRRTGTYDVITAWKAL
LGAEDPKEIMTDQRLIEARREINQEVEKRTHTPPKFSKDGKIAVLKIESEAQVHPVIATR
WAGFLKSKTLEIVMVANYGYLRGKVNFSCRVARCARGRDPPVNIIESLKAVANLDTTDLV
ERLGENFARGHKEASGGIVNSAEFEELCELMKVGEKAEKSEQEASTKKVGKSPQKNTLNN
YFMKS
>56b41cf1-0733-4b2f-bdc3-c6b878176edd (mRNA) 644 residues [BFAB_07:87167-89577 - strand] [peptide] name=Bfab07g00220.1
MANEWKFRSRMPTTSIARISQDPPIPPQHITKRKRITRVITTDACKESGIINELRKKYEI
DLEHPPYYPPKITLPQPPIPRPEPDVLNSKIRTEMERRQFEPLTRDWVWRVLSEMYKVDE
KLWGKWAIDLDGVKLAKGDWRYLLKSHFNSWCENGMMEEQELGHVTNTIADLYVYLACDY
RNRAIARTLKGGDLAGDTPTKQKISAIIIDSDKLYWDQDKGRVFQQGVDEDGEPIMRIRQ
QDFPKAWEKTMKELAQYDDETIANLDYIVIPHEYGAFHTQCIGIAPKQRFIFHIDNSGLS
RAKFANTLEDNFGSYYHSFFQMCLLEAIIYTRFEKGEIDTAEWPLFGQWSYRTDHQTVEY
RTTDNSPNATRQNDSYNCALNTMTSAVNLLFGYDMSCYASGKDLSPVPGLTGKRIRVAAE
FLNGGFNYPFNYPLFKIPTGLQELIIDETYKQNIRPAPPTVQAKRDTDGTIIDVYDGDDT
DEKADLDTEEGEEGDEEEEGDPQAGARTKVKKSTRYRKVKWRGQPALDWDPVEPDPSGPG
STDDDLPIRTLWPVQMDPTRTGKCGIIYPITNPRFSNPIYDDVFECKRAAQFNKMEGWEM
WEDMPLYLFKRWMENVMAGREHEELAPWVKVLKLDAPIFSETKY
>c292fae4-b912-4d9d-8765-7bf834435e8e (mRNA) 1359 residues [BFAB_07:90758-95772 - strand] [peptide] name=Bfab07g00230.1
MGDSSVISGQSRGYRLGVDVGGTFTDVCVFTPEGDAIRTKVPSTSRDQSIGVKNGIVQVR
EKLKALYNWDGQFDGIHHGTTVGTNAVLEGKGAKAGLIVTAGHKDILAVRRSQIPGGLGA
WINFMPPDPIVPLECTVQCKGTMSYDGQIVTSIDEYSLRKDLTRLKERGLEAITISLLNS
YQNNTHEKQVAKIAMEIFGPDVEIICSSDVLSEMGEYERTVTASANALVKPVVKKYLANL
QTLLTNDSETIRILKSDGGLTTLDLAGDLPVSILMSGPAGGVRGVADIVAKKTKYRNLIT
LDMGGTSTDCALIYDGTPAIRRETVVDNLTVRAPSVDVKTVGAGGGSIAQYVELTSTMRV
GPESSGADPGPACYGKGGNEATVTDANVVLGYLPDKLLGGDFPLDIAAARIAVEKIAKQM
GLSIDETAQGIYNLVNEKMYNALRNVSVEQGYNPEDFSLVAFGGAGPLHANAVGKLLGAW
PVIVPIAPGVLCAQGDAMTKLSHEQSISYIKILTDATKSGIFDALSELKTSCQDVVLRAL
NQPSSLKVDYEADLRYKGQALTMSIPLLVEDFGLDSLNFIETIKERFHAAHEQQYSFCLP
DFELEIMRLGAIVTDDSADVELNSIGIAPLDSILTPPQDAIISRKIISTDGKRMEAIFWD
RSKITKAGYKVQGPCVISEMDSNTLVLPGFYGEIDSYGNILIFPDDDTKFTSNIAHHDWE
SAQNLVQKSPLIPTLISSSLQSIRNEMDTLMLRCSMSPAIRDQQDEFNVITNKKGQMLVG
QFGSFITQFLQSWKGTIEEGDVFVTNDVYETSGAISHLNDVIVLLPIHYKGDLVGWAANF
GHMTDVGGMVPGSMSINSTSIFEDGIQIPAVKLYSRGVYNAAMVEVFCRNSRQPDWFRSD
LTALVAACRTASTRICELNERFGPNVYSASCDELLARNRSGIMKLIETQIGDEETTFTDF
IDDDGQGIGPYAITCSMRKTNGKLVFDFNGTSPQAETAINFYLSVTMFKMFVGCYLLAVF
DPYCVVNDGFHDMLEVIIPEGTILRPVRPAPLSCRTHLLGRTMDIIQALMGQRSPQYSAA
AGFSDSPHFFYSGFKPNGEWYQLYQIGFGGVPARPIGDGPDCHCLFPAIKSVPAEAIELN
FPLRIEANESLADTGGAGFYRGGNAQRTLYRFLAKGEFSVHDDRWFTKPWGINGGKPGMR
SWKKLYSLNGEEKILQSKCDHVKVVPGDLLEWVTWGGGGLGDPLTRPAEKVALEVERKLV
TVNGAKRKYGVVVNEDDFSVNKEETESLRKKMKKLNEGEGAVYNRGGTLEELRERCEEET
GLKAPIPQWENDPYGPHTGLEYVQEWFKEKREIRGWKLQ
>dccd0ad0-adf8-4b86-9082-e09866efa78d (mRNA) 225 residues [BFAB_07:96094-97199 + strand] [peptide] name=Bfab07g00240.1
MGLIRSTFTTALLGAAGATSGWAFWTRNSRFIPVSPSDPIFSSAAYVRQNPNRNPATQDL
CQRKVPLSKIKPHLLEKEGKLVEAFCAGVWSGLGYSYQRSYLSKKYQNTTTTSHQLWEPS
QLLSSTYEVGTQITDHFEVVSKTPSSIIVRCGDSPLVTGVRDSDGLFEMKASVDKSEGVA
VFELKSVFFKGTGKSTKKPMPEYVEFAHRLYTKLWMETAVKNCVM
>99d66bb2-5b71-41b5-a2c1-768994a8845b (mRNA) 270 residues [BFAB_07:97262-98630 - strand] [peptide] name=Bfab07g00250.1
MTGKFTLKDPARCAHYARFFQSLTLAEANIIYWSLFVFVLILMSISSIQHHKSNNLTELL
KSDSTSRQIRRIRRRRIHYLSIVSLCFMIALICIVLEVFAAFNIEYCDGEDLIQLYWGFW
SILQVGSLIAILGVMLQFWIVLGNVQTPSWAVALGTPVLVFAALGYIFRHIGKSWRWGRG
KNQEEDVDVEGGRSEESEAENEEGEKRRSWAERWITWAPEDQEIRDRREEDLSKVRTMRS
AECSDMEFASRATTLYTPGQPGDVRRSSTY
>0935ca95-2cbd-498a-896d-9bb2f52b4924 (mRNA) 270 residues [BFAB_07:103568-106483 + strand] [peptide] name=Bfab07g00260.1
MASNSIKTTALRALRTKLTSTTKPTLSPILAKNRGITGTTRKSTSLDSTTSIQPGTPFLP
RDFNGNFPVSFSKPTTTTSFNTLVNSLTTSLTTTSSPHLPTLTRLLHSYDSSSLSDWQKY
AHANSNKQYTRNLVAEVPGIFNLLMLVWTPGKESKVHDHAASHCLMKIMKGELKETRWVT
PEGGARTPEEMDVEGVREYKRGKVAYMCDDLGLHSIANPSATEYAISLHLYTPPNAAMHG
CHIFDPLTGVKTHVAPGAYDSVGGVVHPSA
>eaaedc48-5dc0-4821-9381-60a8b95084ed (mRNA) 213 residues [BFAB_07:107792-109260 - strand] [peptide] name=Bfab07g00270.1
MATDLHEVIQKDLDIKDKIHVVGHDIGGMVAHAYAAQFPKDTASVAWGECPLPGTDAYNN
AVKEGITGGLWHFVLHWQTDLPEALTAGRENIYIKSFYDRLCYNASAFSPNDVEHYASKF
AQPGGMRAGFDLYRAFHQDAEDNLRMLKGGKCKVPSMSLMGEKSFLATIANKQNEQMYET
TSSASIPGSGHWCAEENPAGFVEAVLKWTSKNS
>49d5455a-feae-4a36-8ca0-84d5ef53fdf5 (mRNA) 526 residues [BFAB_07:109613-111655 - strand] [peptide] name=Bfab07g00280.1
MAGSTLQFSKPMSIKEISAKASDFEFNPTIALKYWLRTADTLLREAYIYQAEDNDQQAYL
LLMRYAALVAENLPGHPSAKDPETRSALRAAQKNLPDVLDGLERLKPRINARYNDWQKAL
ERRKEIHAAQENDTSRPSSRADLAASDPAIAGNTTTLGAAENSDLAVKLAHKEFRRRDAA
RLATRQAGVTEEEEQERRTAGLWDDWESALSKSGRNDDEDVIRRNMEASRRRLDGSHDIS
PDGTKKKSAGPTRHVKTKARNASSAYRYPSISKSQPLVSDSGPFPPPGPLPPKPPKEEFE
TPHFDTPPPRPEKQSSDTHEISSSDVVGQDPKFTFRPSAYLENGKPLRTVFLPPTLRQQF
LACAASNTRANLETCGMLCGTLISNALFISRLVIPEQTSTSDTCETTNESAFFDYCASED
LMVLGWIHTHPTQSCFMSSRDLHTHCGYQIMMPESIAIVCAPSKNPSWGVFRLTDPPGMP
AVLNCKQTGLFHPHEERNIYTDALRPGHVFEAEGLEFQVVDQRPNP
>48fc6894-cb99-405e-90db-06f9883350de (mRNA) 746 residues [BFAB_07:111819-114603 + strand] [peptide] name=Bfab07g00290.1
MLRIFPRLGRTNLLKHPTILQHSRLREIHCSPCYNIPQASKSPEPITRTDVDPPVKRTHR
KAVTSGDITGEDALAVGPVKRRPRKVADDVKVDAKDESIVEPVKRKRGRPRKVKEVEVEV
EVKSELEPVPKAKPVPKLEAEQEPELEQEPEAEEEAVVNEVNESDFIHIPLDLRKYMRDA
HMKGSIMGDRTRSNIMNEALCDDILDRLKPSLLKHVGCDVIDINPGIGMWSSKIHKILKP
RTHLLMEPDAKKYNPFLQPLLDAEDSTYQHIPKSGTVWEHLGQVTTPEFLPHQVKLSRDD
PKINEPNNTLLVIANLAHHPRKRYRGFESISQLVMYQLLSAARSHALFHQYGLIRMLVWI
PDVEKTSWLVRHVAQMRKNAVEAQITTEHIQEIASSTVDNHRFVRDAEVALANSIEVVSK
MDTMGITTPKHRQGPMEFKARQSLATGGHKVKSQDFDRFKRGWFDEFRDLQKRLDEGKLS
KYTTPEGEKAGSAEKDKRKREKRNYTEEYARYIFLKAKKKVINQHGELTQDLVNDYNNIN
QLHSKILKAVSESNDTESLRNKLDTMIKMYEDKISQLPLAAQKIYGVRLDGARIGTQFEK
RPMEPLKVYPKEFRPASELCLLDIQPQALWPILRQNYPENYDVFEYIIGNMYAHPIDTVY
ESLEGLWPGALEHIAGECPSLTDPSKGGAFDLKHLSVRSLTTEMLREIVEAWMRWPFRPS
RFELMTKSGSMVHDPDSPDEDILDGP
>c58351a1-0f15-42cb-ad5d-0fc7cc754982 (mRNA) 253 residues [BFAB_07:115525-116792 + strand] [peptide] name=Bfab07g00300.1
MESTKKWADGPFKLLSTPRGSLDGKPESLASRNASEMALLHNILLRGLNCIYIQAPNVKE
TFDIADFMKFCDAWSSILHSHHAAEETIYFRLLDEQSSRNDVFINNHNEHEKFLPGLFAF
DLYVSGVKDDAKPYDGFKLRELIDVFGPDLESHLHHEIGVLVDLEKDESVDWEECGKAMA
QYSKKNADKTRDVPFLITNSDVTYESGIHGPRFPPFPWFVGLIFRWIYIPKLKGAWRFSC
CDDYGVPKELPFA
>a17aee44-75f4-4090-be0c-2ed0b159ed93 (mRNA) 375 residues [BFAB_07:116935-118379 + strand] [peptide] name=Bfab07g00310.1
MFNTMAATTGQTADIATENTRRAAQEIQDYLQARLADTSGPSSFRSLPIIDLTPSFSPSL
ADRQEVAKKINEACANVGFFYITGHGIPRHVCEQVFKLCERFFSELPQSSKDAIHMKNSD
QFRGYEPASYSSVNDFQTKETKEAFNWGYEYGLDPTGGDGKYVELDGTTVGGINQWPNEA
EIPGFYQGIADYYGRILELCKHLFRLFALSLSLPEDYFDPLVTHPGGIARLIKYKPNANP
KPLSASNEEEEVGLGAHSDYECFTLLLQDSTPGLEVLSPDGKWVAAEPVQGGIVVNVGDF
LMRWTNGLYKSTIHRVVNRTAKTRYSVPLFFSINYDEIVATLPSCVSDENPSKYPPITAG
RYVLDRLAMTVPGKY
>3582fffc-2e7e-4306-83cb-46b39f3c328f (mRNA) 169 residues [BFAB_07:119074-119790 + strand] [peptide] name=Bfab07g00320.2
SLNVKDISKTILLFLTSWLTLFASTKTNAPLSSSPISHIVSCLFASHIPQELPCTPSFAL
SIIPLNTRLSYTPSAFAIPTTVPQIQAAVLCAAKHGIKVNPKSGGHSYASHNIGGEDGHL
VIDLRYFDHVVLDPETWIANVGPGARVGNMALALYKQGGRAIAHGVCPR
>e2f1442d-e8e3-4715-8078-7f40b5a66512 (mRNA) 192 residues [BFAB_07:121088-122196 - strand] [peptide] name=Bfab07g00330.1
MVSTLSSSSGGIRDRSTVLLTRTRTKYRWPPLQLNFWILMMLIASSTILGISAYFVSVQN
QLHLGVPWYFPYWIVSASLGVVFLIIMLWLISQRQLLPGIVILGTFILFVLWLVGLIVWS
IELWGPTGNVNGNCNLYVTANEQSGPYSSTLAWLMQHSICQSWIAAWAFMLIGVVFLFWM
MIMSYQVYRMDD
>97b13a6e-d382-49ee-aec1-94b4f8011702 (mRNA) 328 residues [BFAB_07:122871-124974 - strand] [peptide] name=Bfab07g00340.1
MTTTSMVQPKFLSKADQLGVVAVGFSGGQCKPGVDAAPSALIKSGLLDQLEEELGYKLHH
DNTVHSYKELIPSEDPDHRNMKNPRGVSAVTQKLSEQVYEHAKEGRCVLTLGGDHSIAIG
SVSGTARAIRERLGREMALIWVDAHADINTPETSGSGNVHGMPVAFLTRLAQEDKPEIFG
WLKDEHMVSVKKIVYIGLRDVDRGEKKILRDNGIKAFSMHDIDRHGIGRVMEMALGHIGN
DTPIHLSFDVDALDPTYAPSTGTPVRGGLTLREGDYIAECVHETGSLIAMDLVEVNPTLE
PGVNDIGAHETVRAGCSLVRCALGESLL
>e855061a-2dc6-44f1-9b00-3c8c02b8bcaf (mRNA) 148 residues [BFAB_07:125188-127032 + strand] [peptide] name=Bfab07g00350.1
MEASHDPECRRVSKTTINSLEYLYDGERITCFGHSFIEICLGDDNRNKPIQFWKAQLAFR
GFSPRESDIEALKQRLVNSNTDEPDTVVEQGIQKMMRAFRKKDRENKEPVHQAQQARHEE
EGKDSDQDLVKDNNEGKDHSEEMRRRCR
>18d56b61-d035-4fd2-adf3-247ddddbf7c7 (mRNA) 79 residues [BFAB_07:127604-128351 + strand] [peptide] name=Bfab07g00360.1
MDFVKSALKSGSGSSGSTGNTNQAAGGAGKEDYGDKALDFIEKKSGHTLSRDQNEKITDG
ARGLYEKQTGNAVNPKFSN
>c7573506-5307-4d90-8f4c-1a037be55259 (mRNA) 410 residues [BFAB_07:129125-130577 + strand] [peptide] name=Bfab07g00370.1
MTSIEEHIATAAALGSLPLLISPSGENILLSIGYIPLLTNHTLKEKSRKEPRKQNRDVEK
SSPIYFSALELVRDNQFLLLAGPSGSGKTTFAKHLAFRIATTTTESIGGGFIVRNSPTDV
LDESWEFEGIDMIPCYFCISSVSQFSTLLQETLPQLIGSCKDSSKSFCLLIILDSIECLG
GDGPSLLKSMVHLIQYQKQASVKLLVLGESSVVKNWILDSKITKHDISPLSQVKRRMFLR
NITGINIEYTDVEIGIGGAASLPAYFALALETSHGGEKAEELLDEWLHAVLSENYNDRRI
TREALDHSIREAEQGIRTPFSCKLKIANPAIFSKAIQHLLAARQLIEEDAQIAIDLFHQN
PILSEPIIRSWLVRLRDVGNPELLASLEGLVAGCGVDAQLGALLVSNFLL
>65092d15-be05-4f97-a227-1edc1ea0c179 (mRNA) 171 residues [BFAB_07:130634-131374 + strand] [peptide] name=Bfab07g00375.1
MEIMQYSPKRQNGNGIVQSSSPSTENFPATDLTWYDAHAYCPWLTTRWKASEKIALDEGV
RLPTEPEWEIAARGSQTSGNETESMYAWGTERNAGYVNYKDLLLNERCTVGLFPKNISPH
GCFDMVGNVWEWCNSLWGEDLNTSSLPYPYQEDDGRENVDADAETRRVIRG
>4be680cb-125a-4cf7-a23c-c4ab38419381 (mRNA) 103 residues [BFAB_07:131531-132158 - strand] [peptide] name=Bfab07g00376.1
MTNSEIEPAAQNPLELLVPVIKEIEDYSSRDMEYMNRSVQSWISDLDHNLPTVSRARRDD
ALLKVWHNGRGSLESFEKITSRIEGYQEEMIAQGVIEHDHNDN
>c03f0bfd-63e9-4149-9f47-d0ffb8ac375f (mRNA) 1526 residues [BFAB_07:132904-138281 + strand] [peptide] name=Bfab07g00380.1
MAEGDDYTMSSLSTMSETDSRPRTARQDSENEAFTFHNIGDLMADRSDNDDSMSINSQAF
EQNNRTDSYDHRNLPILSPPTDSSVLYAHSDNGDNRSEGLLSAVDAKAMEQHLDNVESSF
LPSVSPIGKHGKAGADDTYLFDAGRNGEKSPAMETQTPTRKRFAINENEGHGSPTPSSPP
TPDGAYKTPGPAPRYSVQGEHDDSEQIGNTTSNLETLSSSPTAAAAARTISRAMSMASMG
ENSETAAQSTSQSQQQSDEEEDMEATPTRSRQNLRAFVQSVNDSSSLPNDSSTRSTNKHL
TVDAGATPGAALSTRNTSIPKFLTSRHSSQRSSVSSFMTNSEIQDDRSDVTVGADYALQS
GGALPSGGLSRSGSMTLSRTISLGSMASGIDEGGDSFGRVEGPLATLAEEDSTRGRSENQ
TNSAPETPRASSRPMDPPTDTIIARHVRNVQVPESMAKDFRTKHGVHTPSKSASFAASAL
GGQRAGKNLTLKEQSSTIERLSKENFDLKLKVMFLSDRLDKLSEEGVKEMISENVELKTG
LAVMQRDNKALRKKVKDLEKQLKDDEDRPSTARSGTSTEGSQKWYQEGVFEREEELLYLR
EKVEEYVTEIERLRNESLARENEKRNLTDLVRTMGERRGQDIETREEMDVWKDLLEQETA
RREQSDDEIKVLREEIFRLKSETATGGQGLSHTTNIYNITKRRVGSPSRSNSNMSDRMTD
DRNGTYSSASTLAEEIKRDNEQLRHENAELRREVGAQTSMLTSRNREKERLYQEIEDLKL
GQRRGGTSVAGESIFERSASRAHERSSSRTSAGTRQTSMNEAEREDFENKQAELRDRINS
LKIHNQDLQRELESCMEDFETAVEHKKEAEGLAQELQEALDVAENDLLTMQADRDEALQG
QEEAELMFESLRKEAQEELDGFAAEQEEANAEIERLSAEVADEKENFNALQNEMREMSDI
VVRLEDDHERKSKKIQDLERELDEANRELEEIEKNYVESNEKVNRLNVQQESSQNEIAFL
REEQDGDKIKIGDLEAAIRNLENALNEEQERARELDERLDEERHQREVVASQEKQEVQQF
VNDLNREATTAKDEARRLRKNLTSREVEAAEWKQRLMELENNLREALGDLNGTRSSLLNS
IAKLQRELENTIRDLDSTKASLAEKERMIKQRDDLLESHALESRKLADMLDKERQTHRLT
KNQYETSQKTSSHTTRTLSQQESRVLELETSRQQDRRKIAQLENNFKEQLTERNNLLLGL
WGRLSSLCGTDWSHNNSLINGRALPSLEAVSTMFPGFSKNLLAAVKTIETLVGDFRGRVK
DLDRRLWKEYSTLENRFEMQTKKLDRLETMARSAVPFSSMDSRAEVVKLKDLNRSLKTEI
SSLKAANDVRSSAYETSTSPSPSIPTGPRRRIDNSLSRSSTMTRHSSAASNSRSQSQANG
EMNTPTRASTMTRVESSIGDPREEEYKPDLRWQVRLQELEYKLKAEREARKLDRTSAAQR
LREKDRENKELQEEMERGRVRGERGK
>3556bdb0-5515-43b4-b92a-9a97eb10f684 (mRNA) 639 residues [BFAB_07:138785-142264 - strand] [peptide] name=Bfab07g00390.1
MPVSSPILMAYPGPPRRAGGFIRYIIGAIGILLLVLYFRSSSESSSFTYTTPTVPDPPKS
TLSPTPYAESSSNNELPISKPNQEHPIDTLIANAETTFEELLQKESHDVNAAAAEYRKRR
GRHPPPGFDAWFKFAQDNNAVMVEDFFDQIYHDLGPYWGVTPARMRTQARDAGMVISIRN
GNATADSDWFWTQIWLQLIGTIQKDLPDMDIPLNAMDEPRMVAQWELINANMEVERATRQ
LADINVVSQDYESLPAPRRSGSGEPDAPRREWETSGPFWKIATRGCHPDSLARRAEVMTD
FSKTPAISMGHSSLHTFKGYVSNYSLSADFCHQPDLQSLHGMMINPLSISSTQELYPLFG
GSKLPTNNEILLPAPMYWVKEERFTGGDDHGVPWHAKLDKAIWRGVATGGRNREDNWKGF
QRHRFVSMTNHTSVSRAESWEAIPPNFALPTSIYNIGAQQENRLGDWVSEWADTAFIELM
CDEDRKDGTCPYTDPYFSIKEGQKMSQQFKNKYIPDIDGNSFSGRYRGFLLSSSLPIKAT
IFREWHDSRLIAWKHFVPMDNRYMDFYGIMQYFLGYEGDNFRIEGHDKEAERIAMAGQEW
ANKVLRREDMQIYVLRLLLEYARVSNDNRANLGFVKDLL
>4e8789e5-51ae-446f-8ed3-b95421c27908 (mRNA) 311 residues [BFAB_07:151444-152875 - strand] [peptide] name=Bfab07g00400.1
MNALIESLTNGDDSSPHQGVLAYRAPSLLQPHRARDAIRDAHDGKIAPLVGFFVALPSPP
VAKVAAQLGYDCVWIDWEHTSMSVETMTQMVHDVQFMSEGKSFAIVRVSGHDHASIGYAL
DAGASILIPQVDTVEQAKQVVSSAKFGAIRNGTRSAPPARYLMGISDTPIDSSKSIWENV
NNQAAVIIQIETLQAIHNLDAILTECGEHIDSVWLGSLDARISMGLPGMGGSEKEWTDAV
ALYESTLAKHNKPSSGLAMGFNVDDKIAMARGKSLVVSGSDIFPLMMQATEAKQMHAGLK
AHDHKGIYKIL
>adc04922-1de7-46a7-86a2-12685ba47c3a (mRNA) 246 residues [BFAB_07:156820-157799 - strand] [peptide] name=Bfab07g00410.1
MSLLERHLEQIALSADSIASLPFPPPQIFTNALLSNQDITALIRDTEPHERALFSVPPPP
PPPTQIAPEPKPSKSRRQTVFNVTSGEVAPASGPNGRAPRRNTAVAAVLGAELHSQVRKT
ETGKGEIDIEVLLKGAEKLNGVYPVQGVPERIRGLRSRYAQLRESLKRHEQKVQKQTREL
ERMNRGNGAESGEEENQQVNEEPSEIEITDEDLRREEREIRELERKKKALEERVTGMERD
LGGLLR
>9e1e57cf-072b-46a1-aa8e-f4971cd22a2a (mRNA) 310 residues [BFAB_07:159382-161017 + strand] [peptide] name=Bfab07g00420.1
MRPTTPNFNFAQSVGPSSPPETPTNSTFAFAPQRPSMNFPRSSPKTNGIIPNGPGPHFSY
NRVENLSPRSTSPSSESSGSASPPRSESSQRAQSPLSSPIHRHSRVVEKGNFTLEEITDS
DLEGYDCDEGLIIRPHQYEDAESDGGHVAPISTPAELDARFLDDLRDLTAHDGTDAFNNE
EQDGSPLDEYEAWVQRNREERRRRRRSSATVQKRSLAQSIGSDTDDEDLKPDHISANEAG
SSARRLRRKTFNHGGDKRASLIFDDPPPRIPELEEPDSCEEVLEDDTELDDLKELPYYVL
DESMDIDSSS
>9f7d58c3-8c4d-4c48-8e4c-eae9c08e2455 (mRNA) 702 residues [BFAB_07:161862-164706 + strand] [peptide] name=Bfab07g00430.1
MNNNILPNQGQPGGSQPPRPQTLFKPEMMRQLPANVFTEEEKVKWEHGLKGLWSHIENNP
PESSAHQEAKRKLVEFSKSVSSRILQYRTQQQQQQRQMQAQQNQQNQQNQQSQQNQAQAQ
QVQQNQQTQQQNQRSPQAQQASQPTTAPSNETPQQDPASQQQEQATQSQDNQATGFNAGT
SSQQQARPQIAAQIPEKILQHVRTFPWHAPQHLTPQSPEWTKWMADMKNKYAKGLMQMEK
TNLQAKSMEDYIRKKREEGTATEQDEADHQTRLAEVKKQHHMAKKFVDDIREGQKRLAPG
NPHQGQTQHPQQTQAPAPGSSNANANGNADATASQGNQGAQGTTQMNQTQGAPRPPMNLQ
QPQNPALQNTQTVNAAIEQARNQQMGGGNRPPGPQGQPSQGPQVPTPNAPSHPPMPQSQP
GQAQSIKSEPTMPGPINTAINQMQNNQQRPSQTNSPQSAIPQSANSISAPHPPGPPRALT
HQAALQTAAQSYSSAGGQTTTPNTVMGHSHTHPNTMPREQQNPSSTKLPIPKHLPERAIA
PPQPVQMGQSRPSFTGGPSGAGNGVMGQPVIAKTPGYVLDGEGDRVLSKKKLDELVRQVT
GGGENIAGGGLTAEVEESILTVADNFVDQVLQAACKNAKERGSKILEIRDIQLTLERGYN
IRIPGYASDEIRTVRKIAPSSGWINKMSAVQAAKVTGGKGSD
>3d30966c-218d-4d6e-9ffc-990699178529 (mRNA) 579 residues [BFAB_07:165255-167752 + strand] [peptide] name=Bfab07g00440.1
MPGKTPYKKGTDPVENGINGTKKDDAKSSLKGEKGKRTKEGEEEMTVVVPPSKSSKLSAP
PPKDGDGDVAMDGSAEGEEGAGVEKVDPVAKAVADIKSNFPLLEKAVALFDARYTLRALR
SISSIRKHLTADILAQVITETYPTATQQAKALLIGIDRENAAFNKASPSEMEIDSDSKSA
KNGKKEPKEIIPEIDIFLSILVQIFFLDNKMNEKGFTLSKHVTTVIHGLNRRTLDSLSAR
VYFYWSLFAEQLAPLPPSPASPIVAIRPALLSGLRTAVLRKDIDTQSTVIVLLLRNYLST
SHITQADLLISHTKFPESASNNQVARYLYYLGRIRAIQLRYTEAHEHLTAATRKAPSSPS
AAGFSQTATKLLLVVELLMGDIPDRATFRIASLERALQPYLNLVQAVRVGLIAEFEAVIT
QHAETFRRDGTYTLILRLRQNVIKTGIRMMSLSYSRISLRDICIRLKLNSEESAEYIVAK
AIRDGVIEATLDREKGFMKSKEVGDVYATREPGEAFHDRIRACLALHDESVKAMRFPMNQ
HRLELKNAQEAREREREMAKEIQDGDLDEDDLSGDFEGM
>3aecfbaf-852c-45eb-b78b-23bca0ea8aac (mRNA) 727 residues [BFAB_07:168133-171120 + strand] [peptide] name=Bfab07g00450.1
MPPRTLRKRSHRASSRDPHSNTNMNADPSANANTNTTGSPNTTTVRTTTTTTTTMMVDKD
GVEVEGSRRVSGGRTSTGGRTSIGSGEKRQRGLAEFGITRSPHPQGKKRTREVEKEEEGE
GEGDEVGNTVNGGSMANGTNGTIIGPMSSTQDQEHINTPKRRRISTTNRVNGSITVTGTG
GRETPRERTRERDVTVSMENSLPSPPAEAGDNEHNVNSVEGDIGRSSPLENNRAGSTGTE
TETAKNEKENEEEKDEQRERNIDEVVFGDLCFKSWYSSFYTRDVVGNGMIENHSQSVSQG
SGKSSKSGKSGKSGKSGKSGKSGKGGERDSRGPKGLQVDRLFVCNWCFGYTVHGGEMAKH
RECCEREGRVPGNCVYEHDENGEWSVWEVDGDVEGTFSQSLSLFAKLFLDNKSVLYDVQS
FNYFLLVHTNPSTKEQQIVGFFSKEKMSWDNNNLACILVFPPWQKKGLGSILIGTSYEIS
RREGLLGGPEKPISELGKKGYGRFWGAEVARWLLECEVGVDTLMGEEEVEEEEEELDVEV
IKVEKKPPAKKPSGKGMGKGWRKGMKGVGMQPQSLSQSSSQPKEIPAPAPKLTPKATKSA
PKLPVTPPMEDTCGATTVEAISKGTWIAVDDVLGVLRSMGVLEKVGSSNREKSGKKYKVK
VDKEQIRKWIEKEGLSLEKCVREEGFVEGYGYAVSDASGVSGEESLMESIEGSGEEVDEA
GDEDELA
>e5f41261-d146-4c94-924f-555abb29805d (mRNA) 103 residues [BFAB_07:173534-174164 + strand] [peptide] name=Bfab07g00460.1
MSREYHDDVIPNSRPKMTAEEKTAVKDAEGPNIERSAGVARNKVDGNNGEKSEKRRKTIA
EMDEELRAKMEGREGAAGVSYEGGKPVTDGFGRGVKSNMFRVI
>efda60f1-25f2-4745-9ed5-a603d9f39bf1 (mRNA) 73 residues [BFAB_07:181801-183078 + strand] [peptide] name=Bfab07g00470.1
MVQTPTQRKANLKFAAVNENKQGKSEAQLHKKELKKQKSPISKGWLYLFAFILIGGLFVD
LLFRVVSYFSGGK
>50131f00-7c1d-4715-b7ab-4dcd688c8d02 (mRNA) 1011 residues [BFAB_07:185869-189571 - strand] [peptide] name=Bfab07g00490.1
MFEKSLYDLIRGLRNHKGNEKEYIQNSLKECRAEIKGSDMDLKATALLKLVYLEMFGHDM
SWASFHVLEVMSSPKYLQKRVGYLGAVQSFRPDTEVLMLATNLLKKDLSSATPMTMSLPI
ITLPHVITPSLALSVLSDLLPRMTHSHPTIRKKTIVTLYRLALVYPETLRPAWPKIKERL
MDEGEDPSVTAAIVNVVCELGWRRPQDFLPLAPRLFELLVDSGNNWMAIKLIKLFATLTP
LEPRLVKKLLPPLTSIIRTTPAMSLLYECINGIILGGILGSSEESAGGEEIASLCVSKLR
GMIMVEGDPNLKYVALLAFNKIVVTHSFLVAQQEDVIMDCIDSPDISIRLRALDLVVGMV
SSDNLMSIVGRLMRQLRSSPSVPANSSNPRPAGHIEPEADSDDEAPEVAIKSDRGSSQDL
LLPDDYKVDVITRILQMCSINNYANLVDFDWYIDILIQLVRNAPITNATSNQEMDESSDD
DISEKIGDELRNVAVKVKAVRSQAARAADSILILAFNDTSSQVSSGNGALRPISWMIGEY
ASYLESPENTMAALLHIAKVSTSAESLIVYLQALPKVFAIIADDERSLWTVERKTMMSLL
MARIINAIEPLAMHPDLEVQERAVEFSELLKLAAEATNGQEPSSDSVQQDAPLLLTQALP
SLFRGQELNSVAASAQKNVPLPSNLDLDQPINPNLHNLLRNVDTISFDEPENDEFEVYYH
QKPEPTSMSSNGPAINRLGGSPDQPAQSYQQGSEESYLDPDIVARRKAERLERNKDDPFY
IALNDGSISGTSTPLHNIIQSNNGPDLDIDAIPIMQLDLGKTNLNTTNTKKPSKKPRQRI
QVAADETLNMSGTSTPANDSENSTDGPMKARMAKGKQSLLQVDSSHIGQFSLEGDNTSGI
DFERQQKEDAEMVKAMKEVERLRLEMQRANERIHAAQDVPPEGTVVKKKTKKKAKPLEGE
EVATVIKKKKKAKKAVVDEGEGEISMAPTTTDAVKPKKKKKKPKVEEEIME
>eb99d4ed-cef9-4eec-b01c-084ad9b7433f (mRNA) 323 residues [BFAB_07:189730-191461 + strand] [peptide] name=Bfab07g00500.1
MSSALLHPPAHLPPALALQNSQQAPSILRNTPSSISSWSLSSLWTAAESPELWTTYENLL
MSCLRTGDEKSAQLCIKRLQERFGVENERIMAMRGLLCEVNAEDNAALQKVLDGYEQNLS
DNPNNMPILKRRISVLRSLGKPSEAIAALNELLDLSPTDAESWAELADLYASQGMYPQAI
FALEEVLLITPNAWNMHARLGEILYIAAGVNDSNSDRYLADSMRRFCRSIELCDDYLRGY
YGLKLASSQLLRKPPTSRNSKPDNSLPFPGTNTIEKLNETATSKLSEIVRRSAAREPGWE
GYDEASLIAARELLNRDSGSITR
>b9111140-f9df-45d2-8877-dd8d4ce307ff (mRNA) 920 residues [BFAB_07:193718-198689 + strand] [peptide] name=Bfab07g00510.1
MPLRTRGQTTRISISHTPNTQSPYTTPSHSTSNSRSNSFSEGSSGHIRSDDSQEFSDNSQ
DSWNGLDYSDDIEPSESASRPRAQARYIDRGQISSREHSAGRPAPSERAHSNYDRPARRH
TPAAERNHRPPISRVHRHTAPGPVSTVEQLDDFSGYGRGYPAQQTAPYGGRVAPAPGYAS
NGYPASASAQYAPPFGNPAVAPPPGSGPGALTHYGGGYPQQQYNQSSNPFAPQSQTSFAP
QPSPSPGGASYFNSHSRHDPMASRHDPMTSRHDPMPSRHDPMASRHDPMASRHDPMASRH
DPMTGHSGHNTPSGYPGHANQELMHYAPQQGYPGNQPYGGGQGYPGYPAYMPPAMSPGMT
PGMSPGMSPGMQTLQHGHHGQQHGQQHGQHGQQNMAMAPAGMQYFPPQFSPPAPEPAPAS
PPVPVIDIEMEKKMVLMEEQMKNAKIESDRAKEQAEAAQKASEAAQKALADKEARELKEK
LEAEEAAAAAQKLADERAEWARKANEAQAAIEKRAAEKQAELEKRAADMEADLKKKAAEA
EADLKKRMEEAQTLLAAKLAQEAKAEKEAADAAAQAALRAEWEKKASEAQADLMKKAATM
EADLKKMAADNEADLKKKMEEAQSALATKLAKEAKDAADAAEAAQAAAIKAEWEAKIEAE
KQLALAKGAADALKAREDEAKARAAEEEEAKKKADELAAAIAAATAAATAAANAANPPPP
PAPPVDEKKKPIKFKDAVGRKFSFPFQLCATWAGMEELIKQAFLHVDIIGPHVQEGHYDL
IGPNGEIILPQIWETVIEPDWAITMHMWPIPEPPRPAPPTGPPGPPPMNPNAPPNGIRPP
GPPPGVAMPPGPGPRPPPPPPGPGSGGPPPPPFPPFMSHPSGPPGPRIVTVKPKKKVESG
VLGWMAGKRPAPSSKSRSKK
>633151e7-b921-42b7-bbaf-a9a5a36c6a72 (mRNA) 2541 residues [BFAB_07:204312-212416 + strand] [peptide] name=Bfab07g00530.1
MPSSERESSRDGDRLALVHRNSAHSISSSIDSGRAIVPMWDSSDPERAPPPLPMNPSSPS
VSSRGTSAAIKSAHAALTERARDNTYFINIPPPKRLTEPSPERLLIKGAAPGHKRMQSLQ
NGSVRDLSSFIESGTFGPLKPPEKISARPATPHASKDFSFDPSPEKFSDKMSDKDSARAT
TPTKRAESPQERRDSIHVRPSLRRPPHGMFSENTPPQSATMQALHNMTSKETDPPLANVT
NGSTALVRQPQTFDAISNQILSLTSICTSLQREMVQLSRRSKDNATDLVSLKEATNARDE
DIRKSLRELVTGLSDAGSERTLYGGNNLYADNKGHASPSSSRNSKGFSLPRIPSPNSFAA
SLDRETLLSTPLTRDHGREHISDAAAHAASVALLEKVLREMGTKEGQELLISRLTEIAEQ
LGREGMSTAKKLEDLVEFIKKNTEISQSLIAHHNNNREQETRGRKYSFEEDSPRLELDFD
RPASVAQKLEALVATGANRDRHKSQGRSRSGEVLGDDVIQVIRSVKDSVAQGGGLTAEVK
ALVRELRGEVLGMGREIGRKLDQASKDGASNGADVTIVVQNGLEELKEHMNQLIRESRRQ
NSASAATQKIDYKEVYNVVRSAVTEKSESREDIIDAVREAWENYKPDIELQHFGLEREEL
LACLKEGIQEFAPQNEPGATREEVFAAVIEGLKHFTPPPVDNESLSRDEILDAVRECLEE
FEFPAAPMPEPREPEITRDDMLDAVAEGLRTFDFSANPTALSAEVLQGFTQTEMIQAVKE
GLKEFDFAAINRGHDDIKRDDMVVAIREGLQTFGLANQNREMDGGVTRDDVVGAVTESLH
TFDFSGSIHSPHHGEESITRNDMFEAVRAGLESFEFPTLNREVGDSISREDVFDAVKESL
HNFNFGALIPASDPEEKETGISREDVFEAVKDGLQTFDSALTREVGGNTGINRGDILDAV
KEGLHTFGSALTREIGGSGSLTRNDVMDAVKDVLTTFDSALIRGRAESGATREEIVDAMQ
EVMTKFHGSSIASGPSQGITRDDVVDALQEVLEGFNSALTKNVGGSATRAEIFEAIKVGL
ESHESSGNITRNDVHEVIKENLQNYHIESALTRDEVVEAVQEVLTAFDSALTKDASSTVT
RDDVLGAVKEGLQAQTSSITRDEVLQAIKDGLQSKEIASTREDVDSITRDDVFDAVKSGF
EIHEIGGSVTRDDILEAVKSASFTREDILDAVKDGLQTFDSALTRGVTPTCTKADVFEAV
RVGLQSQRFPPTVTREDVFEAVSDGLQTFNSAIVSVREANASKGDVFDAVKEGFETYNNA
LTLDIPVGVSREDVLDAVKEGLQTFNSALTTENDVKVDREDILEAVKEGLENFDFAAAKA
STDLSREVVENITRADVIEAVKAGLESSPQSVDNFTAQVSERIHEIMDSVRIEFKAVSDE
AKQQVAANGRDSEQLLDATKDGFEKLRSDIEAYVDRASDVTGKDEILENMQDNFATLRSE
VEELISKSSTTGLEKVHSELEHLRGSIASALVPSGASNDKDEILDALKEGFDGLKPGMEV
SRSRDIDEENMPGTREIIDALQDGFSVLKAEVEKAANKPIDMTVNHEILDTLKKGLENVK
VDFEILKENQKKEQALVEVSDRALVPAKDSLSHNDIGNLEMLITQLGIKVAALESKEQLP
PQLAPGSVTKEDLAKVEELLRSVQDKVEGVVTREVIPDEDRVKKEDLNAIEILLHNAKAK
LDEIDPEQSAKKEDIETMGVFVLEIRDSVNAMIEHLEEVLKKDDITSIETAVHDVMNALA
EIKEQVSNEFKSLDKVTKTDVEAVESVCLDIKSAIEQTVVPEFAVLATKDEVTTLGTLVK
ETAGRIELHATTNAKAFEDRQAETVGVSERVTEVKSFLMEFRDAVKEKLDEGTANVETVR
TFLEGLGETINKNGTMSEDLQAMFHAMTEEFEKTNAGMVGSKLDTDEKFQQTWDKLDSHF
DEKFTEIITKYDELQNFLEERATAGVEKTTEVEANIISTKQVAEDVKGLLDTLISAVTDS
AEKMDEGSKTVFNRVDETFIRVEETHADAKVEHQLTREQVLKTLGVVEGVHGTVTEYNPQ
ILDMIKDVLKMVGQHYEHSKNSVETIQEKIAEIPPPPEIPPPVEYDDTPVHEKLDKLVDH
VQEAGKSVAQLEMLDKIHRQMMSTAAEVSQFVTTQTQKIADDHESKEQAAAEAAIALERR
LVQKEQVEASIASLKGEERAMKEYITKLKTDKEDLLHQKMRLSSDVSSLETALRIRREEL
QEMEERAEGLERRILEGVIDHSRALLLANGNRKKARDPMSRKRNPTQRNSTAHSIASSVA
SKAPSITQGAVNMAMKNRSPTKGPQANQAQRRILSLSQINNNLSSGNFKRSHSVKQPSAA
ATPRKTSWGEDSNKSRNYGELNKENLALKEYEDEDEENKEPGHLSDHEGGNQSDSNTMRR
SSHGTTVITGNEGTEYSESIDGGGRDRDEDRDRDEGSESDYETETDLGTNSHLGTESELS
SSSLGKGKDYNAVVLYEEEVV
>69514aa8-49fc-4265-a41b-83ecc8f42461 (mRNA) 506 residues [BFAB_07:212644-214544 - strand] [peptide] name=Bfab07g00540.1
MSTIKRFTCLRCQFQSLSRPSPRRPYHVSPRLRSEIPKPSIAPKQSIDIKHIRTNPELYE
TSCLERNYKLQSTYPAKIINLFEQWHDYQRDARSLRERNNKLKLQLANPKAIRDDGSEEM
QKLRALSKEEIIAEARSLKDKISEIESSESMLMTEINTLASAIPNLTSESTPRGSEPKVI
GTINEHPEPKAASSDRVWRSHVHIGSELNLLDFSSAANTSGWGWYYLLNGAALLEQALIQ
YSLSLALSKGWSIVSPPSMVYSHIASACGFQPRDQSDEQQIYSITQSPSDAESAKPTYSL
AGTAEIPLAGMKANTTLHESLLPLKTIATSRCYRAEAGARGIDTKGLYRVHEFTKVEMFA
WTSPSLPETTEIFNEMLSLQTAILTSLDLHCRILEMPSTDLGASAMRKIDIEAFFPSRRE
RDNGWGEVTSLSICGDYQSRRLATRVDIDKNGGKIAFPWTVNGTALAVPRIVAAILENGW
DEERKEVRVPEVLWPWMAGRKVLKRE
>0259fd24-9371-4237-b7fa-a69c552d568e (mRNA) 474 residues [BFAB_07:215424-217639 + strand] [peptide] name=Bfab07g00550.1
MISSNQSITESTDEPVANSKFLFIAINNPDDLRDHDTKRRARSHAVKQALENNRKLQKES
GDNFRVSSSKDYSRRLASNRIRSQPRVTIPLSPSVSTLDPFQTLAVDSSRLHALFSNYKA
RQAAEPVFSVKNELVYHSFHTVFNAGLDDPALLNAVMLTFAFAATEGGINQECLRYQSKA
ISCIRKRMSSIDRANMTTTIGAILLLTGVEARLGMQFQVQIHMRAIKQVLDMCQTEGIYL
TSGIKRAIFWQDLNSSFMTGSTRIVDHTTFNELQWKRDSYSPSLFRLPPGFQVRPQVLTK
EFVEILEDIHALSCIRVFSGPSNCKPLAMANINNHQASIQSRLVGLLGHSPILECCKLAA
YLCSSMLCCQVWCALVIPTHVSSRLLRELQQANDDPVWEDHPELLLWLLYIGGAFTTTET
VRSDYVVLLRLNTSSRLRGLYKSWQELLKILKQFIWSDVAFTSDVKALWEEVTN
>a04d1ddb-3c55-43d0-bdb7-209b22ff8b65 (mRNA) 370 residues [BFAB_07:217810-219592 + strand] [peptide] name=Bfab07g00560.1
MAQSRLFQPLTIGNMEVKHRIGMPSLTRFRATDDRVPTTMMKEYYSQRASVPGTLMIAEG
IFVSPSAAGGYPNAPGIWSKDQIAAWKEITDEVHAKGCFIFCQLFAMGRTANVEVAESEG
ISIVAPSAIPIDENFPTPRAMTIQEIEQFVGDFGTASENAISAGFDGVECHGANGYLIDQ
FIQDTSNQRNDAYGGSVENRSRFINEIMKAMVNAVGPERVGLRLSPWSPFQGMRMTDPIP
QFMDIICKARKLNLAYLHLVESRISGADDYSGSNERLDFAYQLWNGPILVAGGYKPADAQ
RLVDEKRPDKDIVVMFGRYFISNPDLVYRVKKGVALNAYDRKTFYIKNSSMGYVDYPPSI
EYLKEHESVY
>dff58684-85ef-465d-a159-90f77e4d2d7c (mRNA) 996 residues [BFAB_07:223866-227254 - strand] [peptide] name=Bfab07g00590.1
MASKKYALLPMEEEEIGPAKVVAKRKEKKSHRESSSRRDKHRERSPRRERSPRRDTEQRS
KTIRNKANDDYEERWGDEEYISEDEPEFQEPASKRVKTVHSDDNISDSEKERRKDQAEKD
AFAQRLLSKNSDKSKTILEDRSDPIMAQRRALADDAAARRAAMPDLRERSRQEYLKKREA
ERLALLRRQVEDETRELNDPYSNLSKKEKADFAKNRELLRLADERSRIDDHRDGYAMPDD
YITEKGKLDQKKKQDALYKRYVERDEYGQEKFVSEHEEWDRQQEKLARNQIQSTERVDQG
EYDYILDEEQGIKWIMDSKLPGQGMDKEARFLGEQLKAAEQKAKTIEETRKNLPIYAYKD
EFLAALDQFQTIILVGETGSGKTTQLPQYLHEAGYTKDGMKIGVTQPRRVAAMSVAQRVS
EEMGCKIGNEVGYAIRFEDCTSDKTLIKYMTDGHLLKEVMITPSLDEYQVIMIDEAHERT
VHTDILLALLKDLAKERPTIKLLIASATINAQAFSDFFDGAPIFNVKGRSYPVEIYNTPQ
PEANYLAAAITTLFQIHTSQPSGDVLIFLTGQDEIEAAEERISDISKKLGSRVPELVICP
IYANLPTDLQTKIFEPTPKGARKVVLATNIAETSLTIDGIVYVIDPGFVKENIYNPATGM
SKLVTVACSRASANQRSGRAGRVGPGKCFRLYTKWAFMNEMEESTTPEIQRTNLNGTVLL
LKSLGINDLLTFDFMDPPPTETLIGALNQLYALSALNNRGELTKIGRQMAEFPTDPQVAK
SIIASDQLACSDEVLSIMAMLGESSALFFRPKGEQRVHADSARARFTIKEGGDHLTYLNI
WNQWVDNDFSTIWAKENFLQQRSLTRARDVRDQLAKLCERVEVTIASCGASNLEPIQKAI
TAGFFANAARLQRDGDSYRTVKRNTTVYIHPSSVLMANDPPIKLVVYHELVQTTKEYMRS
CIPIKANWLYELAPHYHKKKEIEEMGEKKLANRSRT
>3b4041cd-572a-4ca4-bcb5-4581f838201a (mRNA) 106 residues [BFAB_07:227339-228230 + strand] [peptide] name=Bfab07g00600.1
MNRTSMSLLRGSKYLARSGASISQRRFASSETPSPTRAFYKTFTRPIAKTLLIATFIYQL
TYWGWVKLEKDELKAGKRREIKELEEELEKISGGAIKGEDVKVKGI
>fbad3779-2b43-40a4-baf2-7a15a4010cb9 (mRNA) 1437 residues [BFAB_07:229067-233987 - strand] [peptide] name=Bfab07g00610.1
MDSKSRIAQEKLAGLEKASAPFEEQIREAGKFVDIDLDKVATVLDHQKHEEKVFKKKCAA
GSFHGREEWLLRWLLKKLQSPKDKTARITPSSWHLFRLLLNAIPLANTARMLTEKKFIVT
LQQTLQEAQEINDIDDSGMEAQNDSKSGSDSGETSIISKKRKRTGELVTHTYHGPANGLR
ALVMAIHTAINSIVRSTKVSFSQRTAGNGRSPAFTTEYMRAVVRTTPESSAMVLGSWVSL
CQMVLSKKAGVVISPQLMSPFIDIWDYRVAGTEDLMQFSLHCSEPLLALFKMTKVDSATQ
DWKEILEKLIARNIIIPSKASAGEKQDSTLLQSLTRVLVLQDVANAPILFDIAIRSLQSN
GDRRRRPSDNAWLQTVFTTLKAAMPPTKTAAHNSAIREILQRSIQHEVDLGLPELKSLTA
EYVVPEGSTDWYLLETVMKLDANVFLVADNDKNLLNDVLERITNVYFESAWPEQSRHIVS
GIVVPLMNEFAKARDLSGFVRHWYSQLVKFEQTRKEDAMFPAEAFCAWEDEALQIELPKV
LENSLTVQQIVQLVDWLAMEMVNQPNAVVTILEAIANSISKEDVVDIIGTRLYHVIFDNG
NFGKLSDRYSWRAWRVLTRSFQWMQPLHLEEIAGLWEQQASPFTILSTHTFGEKELDNLE
IFRCACSAWNAAEIGTKLENLSSPVVLRCLEQLGPSIGALIDQKMANIEKWPIHLNTLSR
GAQWTAWSFYNCIFQEYPRALELGIKLQDSAFELLLKNILWIASLAKTSTTEHVLNHGAF
AALWFGVLRQDCVLNHSSIISRFIDVLLNCQTQEENPLTATFTCNYAVIESLTQLPLEVI
GKKYRERIMQSWSTDLLAQSPECYPAVLALKLKIMHRPTFYTGMKYKDFEEIEKLIKKVG
FEEMPKRLETLFTLRELVKLTLSHVTSNLDQYQNRNYVLDAISYLQDKLSKFTSDEKKTK
GEKALPFISTSHSLLTVLITKSKQLDDLAIVSNQDLTDLCTSFRKFLLVQLQRRLKKKPK
IDEVGNHKDGSLSVVVVLQALESLDVDSSELEPLATEGQVYAAKLNEGKPEVDGVRQLLP
EFFATRASSNENGILHISLEAFINTSAGRAGIKKKMDTITSGMDNAEKLQLVQHLMGEEL
IGLNQLDKLVAIRCVIGACDNIGHEPADAKNSQRSMDLCQAYDLFCTQIIKTNSYRVFSL
LGEIMEMMLKTKRRALSQWSVDRTLAILAIICSSKGPSLPTSQANNIFIRLCALMKVVLT
NHRFRLEGHLHCVIQVLQPLLRCFFTAHSHTSKRLLQAFTPPPWLPQLQPGITSSSSNTL
SPIAAESFTRLLTLICDPTPNSISHSSMNNLTSAVAKAKKIAGQHMHIILQTYIKFNLEM
TMKSEVRTAMTPGLYAIFGCTDMEGRKAVVDGLDSSARAVWGTLYRDWARFGKWKGA
>88939bcb-2067-4d9a-8918-8bfcb073f4bf (mRNA) 366 residues [BFAB_07:234145-235646 + strand] [peptide] name=Bfab07g00620.1
MSQDEILPSNEGTIAVEGISALTIQDPESSVANDRPELPHRSHDPENNMKRSDPFQFGSR
YLSEKDNVFEFNAWDHVETDDTYKEYAELQYAKQREAPVSEFDKSRFNSDPAKWWNNFYK
NNTANFFKDRKWLQQEFPILSQVTEPTYGPCTILEVGAGAGNTAYPILKHNQNPELKIHA
CDFSKKAVEVIRANEAYDTKNIQADVWDAAGDDLPPGLEEGSVDVVIMIFIFSALSPSQW
NRAVQNVFKILKPGGDVLFRDYGRGDLAQVRFKKGRYLEENFYIRGDGTRVYFFEKDELV
NIWTGKLPESDAQATDSTTEQECGFDIIDLGVDRRLLVNRAKELKMYRCWMQGRFKKKSL
PSTNPK
>799a3632-eef3-481b-b199-823782cee5f5 (mRNA) 422 residues [BFAB_07:237040-238894 + strand] [peptide] name=Bfab07g00630.1
MPSRRKQLKRKQPVATRSLARLAKKHRANTPEEDVQAPQRDIEEPEVKAELESNDKSPVA
TNPGIEAEMFDDGADADDEAEEFQGEGNDEDERHEPSERGPEVGKSDDETDYEQYIAYGS
DDPEYQEIRRKRENEVSPLPRIPTIPRLITILRGNGRDTSDQRLTASSGKNRLPNFFDKY
GTRHHIPIEIFKQILDYLYQQKDFITSTSVSLTNVYNYGLVFDIFGLSICRRIKDLLQNQ
PVEAWETGFFDLPVLFAPPSRPRVCLRNVLHSWFPERLTWIQYGNKCMYHGPISLKLIRR
YIRRTEGEGQRRAIKEHETRLREGRENKLQRQRDRKERIENRRNRRIARLSETQEAHAED
SEFSDDHDCVKSQCALNPETAHKKIQYVSSGRDPITDSEAMNSFAEDSDDMGWSTEDSMP
AS
>632b4180-8924-4401-a8b3-2b01ea25992a (mRNA) 356 residues [BFAB_07:239213-241056 + strand] [peptide] name=Bfab07g00640.1
MARQFRVHVPAVHVQPTFHLIEAEILDLSYQALVLQVDGTVRLDKTAINPAAWRARAGAE
LVGGPNGIPPGRIRNKLAALPTGPQLRNSCTMSFSGQLGTFGTPGAMPLMVLAVRVDDPN
DGTLQPPPLGLAIGKANHDYFLRKGISHIMSRAMNIRKGIPNDYDPNDMEQVNENKWRSE
PPVSIAFPLIGCRTGYGFINAAENILSAIIGWYRDPQHNGQFGNAAMRALSIPDIYLVVP
PRTPLNVRRLKPALIRSAWEKAWNRYMPPPPPAAGAPPVHLSREANGNQFDQNRQHTMPG
WTPNLGNVLLVDGVDDVAGGFPLNLTPWVRENITDAWVRRNCKVFRGGRIRRVTVI
>965318b3-5081-4d20-ac72-a3c62cc43117 (mRNA) 294 residues [BFAB_07:242008-243414 + strand] [peptide] name=Bfab07g00650.1
MTYRNSIIITGGTINLGYQTALKIAREHPDYLVVIASRSDEQNSAQSINKLLHQDNAIFM
QLDLSDSKSVRNFATKWIADSTKPQIKALVLNAGLQFPAGLVITPEGLEATFVWDMHFFS
SSYVHISRLIPAWFSHRAAHTILRKRLPEYNTAEDLAHPPESMIEIPGRKQRAPERHITV
TAMDPGLIPGTGLAREANKFEQWLWNSVLPHMIWLLRLLATPNTHTPAESGTALARLATA
ADVEGTTGKYFEGLSEIKSSKDSYDEGKQEDLWNWTVSYLAKDPLEKAKFESLR
>7a5f8835-b7b6-4013-9e2e-8cc22bae8984 (mRNA) 536 residues [BFAB_07:243711-246034 + strand] [peptide] name=Bfab07g00660.1
MRDYSNNASSPKYGGTDQVSETPKTGVGTQSNFSQEEGESAYQTNDARRQIGPISAIFLI
FNRMIGTGIFSTPSTIVALSGSVGLALFIWVAGMLIAAAGLATYMEFGTGLPRNGGEKNY
LEYVFRKPKFLVTSMYAMYVVLLGWAGSNSVVFGEYILSAAEVEVTRWNQRGVGLACITA
AFLIHGFSIKWGLRLQNLLGVIKLLILLLIIISGFVALGGHLRIEKPNNFTNAFEGTTGS
AYGVVTALYNVIWSYIGYSNANYALSETKNPVRTLKMAAPTALAIVGVLYMLANIAYFAA
VPKEEIMTSGRILAASFFRNMFGSRAERVLSVFVALSAFGNVLSVIFSQGRIVQEIGREG
ILPFSRLWASNKPFNTPFMGLFEHWLVSVIIMLAPPPGDAYNFILNVISYPLAVVNVFVS
LALLILYARPFAADRHPQHWAPPFRATWPVVLFFLLSNVYLVVAPFVPPDEGQNVYESLP
YYLHCVVGIAFFGAGAIYWLIWAQILPRIGGYKLVRENIVTDDGWSGSVFRRVKSE
>b8f0de41-773d-47a2-9361-0d4bcf18bb9b (mRNA) 432 residues [BFAB_07:246131-248294 + strand] [peptide] name=Bfab07g00670.1
MAPLLEDPRIRQTWNQFSQNAEHATENAAAGIWTFQHNYLNPCFSTIGNGFNSCTAQCFP
GQEERARRLRERGRTRGRAEFSFDFYDDWDEDEGILGGWGNDELDRLLAGSGSHSGNVNE
APKRKRGMSYGTRGRKKGLEGDPTIIPSTSAIGFLGRLPWKLGGTLRYKPSAADLQEHPG
AHRSDFNGVGEEADALMGDDLDDDVRDFMRGHTRNRSSTQSSGETSDSFRSRGDLFPSDE
EDAVPLSDEFAMVLERRNTNSGTDDKSSGKTRSSKGKRPAQSRDVSRTTQSSQTLRPKGV
RSGSGTSLQSNPDLSEHDLINTLSIEDLQLEEERIRLEEDEEVERKRQAALRLAQERGLH
AEGNSEPILSEPKQDIEEVDEPSPPEVVDVVQATELPPAQAKAQDDKNTTEIKDTDNDKG
NHFVPARLPNFG
>be62dc66-e0c1-40db-a66a-597041ab2799 (mRNA) 356 residues [BFAB_07:248682-250139 - strand] [peptide] name=Bfab07g00680.1
MATQGPITTPLTTLLGIKHPIILAGMARTSGGPLAAAVSNAGGLGCIGGLGYTPQQLREI
IHSLKSNLSDPSLPFGVDLALPKVGEGARATNHDYTHGQLDALIDVTIEEGARLFISAVG
IPPPHVIKRLHDAGILVMNMVGAPKHTVKALDAGVDIVCAQGGEGGGHTGDIPNSILIPA
VVDVARKYKPAMLKGETALVVAAGGIYNGRGLASSLMQGACGVWVGTRFVASDEAGCSRI
HKEEVVSARFEDTLRTLVVSGRPLRVKMNDYIQSWESQPAKIQELTRKGITPLEYDMEQG
KDVDIPHLMGVVAGVIEDIKPARVIVDEMVAEAVDMLGKADGFLSARAGKAGWSKL
>d34bca41-8ade-40aa-b356-d43af3a5f48f (mRNA) 181 residues [BFAB_07:250355-251540 - strand] [peptide] name=Bfab07g00690.1
MSTFPTIYEGVQSGTREETKEETLRSGEERLERRQSHDRVEMASRSSCESEVPGEHSDSA
LPPPYVRSRLAGYLEAELRSFPGGDEITTASVPQWTWPRSACRLWIYLMVLEKCERGAII
AYETACRFNGFGPALYIMFKSEWRSLLHESPEDSMTIYYHLLALRNEKGAVPPAFEISHS
C
>c0fa65ee-402e-436f-a69e-ac33469d3014 (mRNA) 407 residues [BFAB_07:252663-254653 - strand] [peptide] name=Bfab07g00700.1
MSPIPITILTGFLGSGKTTLILNLLPQLHALNPSYRLALLKNEFGDLAVDSQLASSSSIT
SVREMLNGCICCNLVGSLSSALQELQESFPVKVNGSTGEEEKGSLDRIIIETSGSAFPAT
LAMEVNRIARETKGAYVLDGVISVIDVENWKGYEDTSYTARLQAKYTDLVVFNKWEGVSE
RRFDECLDRLGDLEVQVAWVKSDKGSVGVDVVCGVDGGLARGLVDDVDGKENGHSHDHTN
GDHKHEHSHDHQSEVEVLSITLTSSSPSSTISLDPLNKLLTKAPKDEVYRIKAVLSSSSP
IPPSDSSLSPPESDISASSSSSNSTSDLTPKPAKYILNWAFGRWTSTKMEVQQLEKEHES
SQGEGVVLRMTIVTARDESNKWKKRIEGGGWVEIDGGEGELKVVRIL
>448333f1-d1bc-48ea-807a-3ec18520fcda (mRNA) 638 residues [BFAB_07:256809-259860 + strand] [peptide] name=Bfab07g00710.1
MVFSTLALVGTFAASATAYSATARTFAVNHFYGTGPLLTARIDPIINPGTVGSHVHTIQG
GSAFGMTMGDTTALDDSNCTSSLVKNDKSNYWTPSLYFVDPKDASNITAVPMFYMNVYYF
FEPTTDKITAFQPGHRMVVGNPALRTPPAGGGASIVDYKLGTPQPVQVTCPRSNYDVPSY
PADSDGLHGVGIQDPQNKGAGVGFPDQECDGVASPMRLDAHFPSCYNPAAGLNDYKTNMD
WPTDGNCPEGWIHTPHIFYEVYYNTPLFADQWAPGQGKQPFVLANGDPTGYSFHADFISG
WDVETLQQIIDNCDAGDSGMDKCPGLIGGLNDPQTSCTIKSPINEIVSGSMSILPGSNPL
GKWGAGVASVASSFVASATSGVVSQASSVAVGASSAVSSAVAGASSVAASVSNVASSVLE
DATSAASISIPSISLPLYQATPSDSAQHSQTHTRNGAFTKVAAASSAASEVVSSRVITSG
GQVITSIVTVQASTLIYKTVSVTAGQVLPTGSSVSSSTPAAISGYSYAGCYADQESNRAL
SGVTFADLGVGAVSSTACVAYCEGKGYSVAGTEYGGQCFCGQNLPSQTLNASECAMACEG
DANEICGGSLALSVYSKSGASKKEKRSSRHLHRHVQRN
>4b8291b1-57d6-414c-aee4-ef9b25a76230 (mRNA) 952 residues [BFAB_07:266265-271153 + strand] [peptide] name=Bfab07g00720.1
MASTTTSTSSLSSRRQKTGVGSFTINEQIGKGSFATVYRGTHMPSGNLVAIKSVNLSRLN
KKLKDNLYVEIEILKSLYHPHIVALIDCRESASHIHLMMEYCELGDLSYFIKKRDRLADN
PTLYDMVQKYPMPVEGGLNQVVVRHFFKQLSSAMEFLRERDFVHRDVKPQNLLLIPSPEW
IAKRAKGGPEAMKASKESVVAMVGINSLPMLKLADFGFARSLPSTSLAETLCGSPLYMAP
EILRYEKYDARADLWSIGTVLYEMMTGRPPFKAINHVQLLQKIEKNQDEIRFPSRGIYSR
DLKDIVRRLLKKKPEDRITFPEYFAHPVVTEPIPGLVGDDRPKEKSPETSIVRQPSLRDR
QRESPTVKHIDTAYESLITRDIGEQSPRTPNIESNQPFGTPGRSSGRPDSRDRPSPVSAA
TAPNVDTLPRQRDRKDRTEPNYAPIVRTGSTKQRYDEQANLQPKNEVQSSNSITEAEQDV
RDAREYVLVEKKAVEVNAFADEMAANPRLGRANSAPKQLPRRHTSMGEPNSTTGAVAVPP
SRIVQRASGRAQPDTSSARNSYGSYGKTGSSPSTASAIAKALQGASVRVFGVSWSPTLIG
KGPSPPQLYNPYPAYPTPNAGLIGDGRPIDEDQRVVNIIEDSATRSDVVYGFAEVKYRQL
IPLAPSMNHGLGGPNPERTGDAMDEDDGLTVEAIVNLSEEALVLYVKSLSLLSKSMDIAG
AWWSRKQRGGIVSGGHTPGSDSSSAAQAGNRINGAVQWVRTRFNEVLEKAELVRLKLVEA
QKRLPEDHPGHPNNRSTASRLVGGSSTTDGVVLSSGITAEKLMYDRALEMSRTAAINELA
NEDLPGCEISYTTAIRMLEAVLENDEELIPRKRSSSLREDKEKSEGGEVNGINFGDRKDV
LKVLQMIRTRLQVLKKKMTAIAKHQSMPPPSSSPRRSYSGGTTPTINNTPPK
>b85a8108-053b-47cd-ab3a-8042b28823e7 (mRNA) 476 residues [BFAB_07:271599-274468 - strand] [peptide] name=Bfab07g00730.1
MAPHADTLSTNGDGSTLKATAPTFSPVTSIPESKYHSTSTASAIHDEHAYAAHNYHPLPI
VFARASGSSVWDPEGNHYIDCLSAYSAVNQGHCHPELVAALCAQAQRLTLSSRAFHNDVF
PKWAEKIKQVFGYDMVLPMNTGAEAVETAIKIARKWAYKVKGVEQDKALIFAAAENFHGR
TMTAISMSVDPESRDNYGPYVPGVGAACPTTKRQIRFNNVSDLEIVLEAHGKNTAAFIVE
PIQGEAGVVVPDDDYLAKVHALCKKHNVLLICDEIQTGIGRTGRMLCSEWSGIKPDMVTL
GKAISGGMYPVSCVLSSKEIMLTVEPGTHGSTYGGNPLGCAVSIRALEIMEEEKLTERAE
KLGHVLRKGLEDMNSPMIKLVRGKGLLNAIVIDETKTGGHSAWDLCMLMKSKGLLAKPTH
ENIIRLAPPLVISEEDIQKALAIIKESIAELPNLKGEKEDDVIPAGEKNVHIPLEN
>dcf2ddd9-d361-4431-9e08-d300564576cf (mRNA) 714 residues [BFAB_07:275591-278510 + strand] [peptide] name=Bfab07g00740.1
MSNSIPTSNKEVKSSSPPTIPSPPPHHLNHNLPNPDIQENGLHALVNIQTAKDIWTFLLV
FRVFNSFLVKTFFQPDEYFQALEPAWEMAFGEGSGAWITWEWHYQLRSSLHPTLFAAAYY
LIDKPMEFVNFFPQFRAEVLAVLPNIIQAIFAACCDYYTWKMAEKMYGLGSRTGYVTLLM
SVLSPWNWFCSTRTFSNSLETSLTITALYFWPWDMAISSGEKIKEGRKEMSTTSISKGVF
RTTETVNHLRYSLLLAGVACILRPTNLLIWFCVIMPVIMSLIPGVSPKTTKPPIPQDYII
LLREAILCGSIILIISAISDRLYFGEWTFPPYQWLHFNISQNLAVFYGKNDWHYFFSQGL
PLLLLTYLPFTILSTFKGYTPSTMPNPEFTYNLQIILTHLTGVMIFVLSTISHKEVRFIY
PLLPILLLLTAPSITSFFTRETQIPTNDSSKSKIETATIRKPLLTILILLNIALAAYTTI
IHQSAVISVTTFIRHKYETEMLDAQGIPLHSPDAYTYLKHYPASFDEHAPPSLNIDYDIK
KEENSQYAKKMMGTSQNPDWDGENGEGAIPFVGFLMPCHSTPWRSQLVYKGLGAWALGCE
PPVHLEMGQRDMYRDEADRFYDDPRRFLREEILIEGDGDGEGDGDGDGKKMWPRYLVGFE
GVEKDVREFYEGLVEGAQDGAGRGKKMKEIWRERNTQWIDDWRKSGDVVVWEFV
>6d638fd5-7107-4237-b229-ebd3869166de (mRNA) 1013 residues [BFAB_07:279298-283028 - strand] [peptide] name=Bfab07g00750.1
MEEGLDLNLGLQTAIREDSGSRIQLQMQMQQIPSTMQQSQSHTQQSHAQKLREEVARRGE
TRDTLTGEKAPRLERSPHPYHKRHEEIPFGSERSERNPVIRNSKGEEWTSRVPARKPSSL
NPSFNLRPSNSQTRTSSSGAPASPSPLRSAQNTDDELYNGVRVTIDGSSNGYIESTNSDS
GTEADDEHFLKGRPAPRTKPHKGLRGVDGSMSNTPSPLLSPAILDDEIRWKESGRIRSTI
PTSKIVTKEEQRKLIEKFKQRRKIEIVRRTTEACLLCFVGGIIYQSQGAKEILYLWKNEL
GCQILIISGLIALYPLRLLRHLSSRTPWKSPFPLTIPATFDPAPLLYPPTITMLVSILLS
VSDPSGLLPSMILAISTLPKKLIPAIGGLEGRDMLHWVLACMPLFTTTLTRAPFLSKESL
PLNPEVLVLIPPLHQALCKTLYYLTTTSLLAAELQLLSTALISLLLRASSPQAVILKALL
WGGGIGILVTCTHVLRWGVTLARVPTWRFRRPDPKNSGFRFSKRSLSFGTNTLSVFAKDR
FISDTSDDELHSRYSQERGGKLHSSEFSPLDGEYSGISRRNNLPGSSPSKLKTRTPSGRK
KRSASISLQSFSRLTYRQATFRKWGYAIYVYICILVIVLLGIREYVGKEALQGYEPVGWA
LGYMFGDLPRFRLEVVKANLQRWIPLPSRSHSSDDLELHERTKICLKRGWVERIRTQDFG
AANTRLILLGYWLLIIITGLAIVFRLSKIYEVDTRRKVFHFMMVFILLPSTFVDPNYCAL
AMALVLGVFLLLDLLRASQLPPISRALAKFLMPYVDGRDLKGPVVVSHIFLGVGCAVPLW
LSLGSLPSYSSSSMELLDFVSGSEIASSKFLSSSSFEGGAEGEAMDPWKGWEIPQRQREI
AMVAGVICVGLGDAAASLVGRRCGKRKWYWGGGKSLEGSMAFMVVVAVALVGAKGWVRGG
GWEREGSDAWSVTVGKSIVAAGVASLTEAVLTGGNDNVVVPVVLWCCVKGLGI
>1661f23e-42b5-47e9-a93c-53be70957ca6 (mRNA) 1103 residues [BFAB_07:283345-288845 - strand] [peptide] name=Bfab07g00760.1
MSAPPISSLASGDTGVDLEAAFKESLGIARDVVKGVLLKSLRVSFEGHNISFPAQQILSG
DETYNTLLALRDSDSPAGMMIDSDVIQLPYSGNTISSTSQSSAMGGQMNQMSFSPLTTSN
LNSHTRPGNPLQQQPFNNSNHRQQSSFNATQSQTELPQLSNLLRTVNTNNYTQQQTYPSN
NNSYSLSSNQPLRPQLQQHISATKYPQNMDDLFSRSDSVLASQIPANRSNYQQQMIARLQ
KDSRTLANQSYSSYGGQGPIPNLERSSSSNSVLSSSSLPTLAPAQKLPQTENLLVVESRS
STQSRSETPMDLEMTKATNMRKRKIQTDEQKAAAKKARLLKVSGKAENAEKINKLEVAKK
KELTIPADVVIRILEFCPPIFLRKARTICHSWNKWVNGLQSIHINCRRENYGYNLPDEIP
GLSAMQYVDLLGGKGCMEPGCKNKDASRTHWAWKKRWCLNCWKGKIEREDRIQKHRQLKY
SLPVIDKLLACIPVSMYDSFGKPHDYVEEGDPGAIQTSTHRLYKYYLIADVENIIKEYEA
LTPDPYREDPTHNDAQKATARQIWEEKMEKLEEDRDAFFEAKKAKNAKVMQLVLQVEAAV
REKRAKGRKPNDANRESRRILFSTLAKRDLPDIPEDFIANSKPFKAAVRIFRDGGSERGW
RALKPKIQAVYQQEQSRRTDQQAIVPAQDVPSRGNLDEDFQMTGQDLENFEQANDALRQI
GNQGLQQNTQQSQLERYQIPTSVTNNRSSLAMIHAGSFDSGKGAMATTLRPLNNPTMSFP
GGLPLPNDSLLNTSHNNAGPSVNSLSNISHNSGFSASSLGRLSGINNGSLIGSTSMSSRS
NNGFPASSMNSLTQNHSSMILSNSAYGNSGLPASAMSILSQNMGSSSSASRNISMASLPQ
NGNNSFMGSPNNGPHSANNNLTNSMASRSQSMNNSSMGLLSNSSRGTQNNIGDFMKSASY
GNNNFSANPMASLSQSINSANASSPEDFFKMNPYGTSNQMSQSNNVSSANALGDFSSHST
YNNAINSGSSNHLTQCNNTSSLLPPPHLSYASQNNNASSVNPSNQVYQNNGSSSNSSNPG
SSTTSRSAMAISSILTGTQPHGN
>9d31d1a4-c7a3-469c-893b-78254b223563 (mRNA) 513 residues [BFAB_07:291110-293499 + strand] [peptide] name=Bfab07g00770.1
MGLLGSKNKETGSSPQPSFSEDQEAAYKGNNSYVPDIPSAEGQPEFDELHVVCPSHTTEA
KLMRKIDLRVIPFLCILYLLAFLDRVNIANAKSFKLSTDLKLTGTQYNTALTIFFVPYVF
FEIPSNILMKRLNPNIWLSSLMFLFGLVSICQGLVQNFSGLLATRFFLGLCEAGMFPGCF
YLIGMWYKRSEAQRRYSFFFSSTTLAGAFGGLLASGIGKMDGLRGYSGWRWIFIIEGVLT
CVVALAFFFLIPSFPEDAKWLTPDERAYVKARLQVDQGRSAAERKITFKDACRVFKDYKV
ILGGFMYFGMIIPAYGYAFFAPGIISTYGYSPIQTQLHSVPPWACAFAFAMCIAFASDFT
RHRFAFTIAPICVAITGFAILLTVHDNTKLQYAALFLVAMGAYAAMPVIVCWFNMNLGGH
HRRSVGTAWQVGFGNIGGIIATYAFLAKDAPEYKTGYGICLGFLCLSAMSCLLYFVAVML
ENRQRDRRPRDLGLTEYEKTELGDLSPDYRYLL
>1823ac26-b395-4699-ab5d-7066a70b9a8b (mRNA) 321 residues [BFAB_07:295370-296640 - strand] [peptide] name=Bfab07g00780.1
MLLSATSLLLLTVPAFGQTLNAWRQTVYGEGCCGYAVDGNVTTSDEVVSLPDTLALLFNF
QAGYIGFYVQSSGAYITDYYVEAVESVTFKEIIVGKVSNATSNFTVVNFYDSVGEAGIFT
DTMFFHVTGVSGGNSTAFVNEIYPIYPGDTIVYPSGQSAQPSPTQTTTAIPAPTTTVYPT
PTAPGITLNAWPTISATKPVVQDNAGTYVDGNPSTGLISSRYFLLFNSASTYEGFYILSQ
SPDYITDYHVIAQNPITYANVEVCRVTNATSNFTLCAFKDEDGNPGFRSATMFIYQDGAE
DGKLNDVYPIWPGDVIVDPNA
>cc28f77f-b262-4317-aa19-86dc28a6a611 (mRNA) 399 residues [BFAB_07:297399-299210 - strand] [peptide] name=Bfab07g00790.1
MEGKSTEKKAKDIKAKDIKGARKEKTDKKKEERPTHSSSQSLPPRTISKPKPDDGDVYKI
CVMFLPQMQRIVETGMVPCDGIIQQTLRGFLCGHGIVPVIRELASKDDSEPGERAHPKGT
GSSKLTSALVKLFNENALLGEGMDFCHSLRDPEKEKAMRIEFIPGGSIPVQLPLKERDVL
FIESHETDDRPYLMQDNFPDHIRISEDVLFKACPFIHSAFGAKDIGKFADPDDTCLYDPA
YTSNRKRCIRQAKLVYIADLIASSYGRTAQDYHSLSDSKQIDSWPKEKLWKHTKSWVMFL
RNNDFSERISSNHELDELCMLAAFFGAKNNATTALRNVYQAQKERLIREKTHPRPVLLPK
EEPERKRLSPERAARQSDYAPSEICNEMLGTTGWRSRDD
>eb49fea4-d530-45cc-982a-22dcdf36b3ff (mRNA) 467 residues [BFAB_07:299954-301943 - strand] [peptide] name=Bfab07g00800.1
MANVNHQPGLANAATQREFAFRIFLHPQRPIDINATEICGSFNTPQKPPLSGNHTVMNAG
IISRQGIFAWVRGIINELISFNLNSVNLVPALWGQLFKIIQNHSFFKRWIFSRPRPGPMG
FLTVVHDPSEEIQYTGENVLGRAQIIWQEIEADLKNEEPNQFIGEIFQQVFHIWQYKCFM
NNMLMDMRGRPRTTERDTFSELVRYGLIRPLPLHNHPAPQINPPAPALQVPAYQPAHPPQ
NLVGADVGIVGHPSIIGNPSNNPTRGASGARAGAEPVTGVSVAAGTLEISDDESSGQSDN
TNSAFNQPYPRMPTPEPNTGRMVSTLMLSGSALAHTLRGANHVVSSAIPNAVQAGRSNIP
AASVPQSNGNQQNGNAQGNGQPRPKPGATIEQSRPPQSNLHCHSSTRRQLHIPQIPPFKS
AVPGSSTAGPVATQKRPATTSSSTSSPSDPSRPSGKKFKMERPDVDH
>53c768e2-9d35-4dc7-bd2f-8325a775e6e6 (mRNA) 743 residues [BFAB_07:302699-305396 + strand] [peptide] name=Bfab07g00810.1
MFNPFARSKNDLPSMNRHSITAWAHDIIDELQRIGTLNSGDEKAADDIFRVYQNMLQFYS
WVCTRPRIHVTHAQRPIQQPWAQNDIFASAHKVWSDLEWELRLEKDGAFVDQMIEHLGWF
WNVKNNLVNQARHTRGLPVLSSMQTMAEAANYARISSIDRANIIQTPVSRTIASGFHFHR
PVAPASRDNPRNVTEAFPAGQNTRRGSSSDDNLRPSQTCSSEIPSIRQPKTGHLQLPKYS
QSVQEPPNSAMPVALSVKGKHSPHLHPGACYQPPTARDKSSHNVVNMSGDKYNDGVEYSQ
ISQVPVGLILPAPQTRNDRYPNRAQGFGDGSKRLTTSIPSVKPAFSGREKHGRDLPNSHD
GQLAQSHSDITRTTAGSYSSNIRHPVNTLSNDVIVILDTPLPESITTPIERLRPRDYRSH
PSSPAISSEDKHEVERPFSVGRPPVHSRDITRHSIYPINPAGPCNQRLVESAEVDKMRSE
SSDRRSTKQGSDGTGEKKQKRVTEVSDKKANAMESDLSTPKEKKSTPINGDQRNMKIDCI
GKDEKTLTSSINLIQNYRMNDFRKANTTRPEPINTISANQIKRARISENSTISSPGYTSP
YTNFLKQYQLSNLNSPKGSGIITNFAGDKGEENEAVGGGYIGEKTGNEKSVGEKTLEEST
IGSKHMNQKSINEELVSDRFINEKVVNEDSTGDEITVEAPAMEDAVSKKTSRNKVASEKS
LRNKPLSAKGKKSKSLYRPFSMR
>3fc4849e-5276-4b61-bcd6-488302973ee0 (mRNA) 119 residues [BFAB_07:308478-309573 - strand] [peptide] name=Bfab07g00830.1
MVFILGISFAERNLVKKSLESFYGLGNQASARIMAKHYIHPTATVGSLSQKTVTSLTAEL
STMPLETELKRRLQDNIERMRTMGSYRGRRHAMGLPVRGQNTKSQISTARKLNKVHRKG
>7fb72513-cf82-49ae-abdd-d77494194673 (mRNA) 292 residues [BFAB_07:309723-310959 + strand] [peptide] name=Bfab07g00840.1
MLTLQRFVVSALLILTVTFLFFAQTAEAAKGPKITHKVYFDISHGDEPMGRVVLGLYGKT
VPETAENFRALATGEKGFGYQGSTFHRVIKGFMIQGGDFTKGDGTGGKSIYGAKFPDENF
KLKHSKKGLLSMANAGKDTNGSQFFITTSTPGHLDGRHVVFGEVLEGYEIVEAIENVKKG
GSDRPVEAVKITESGELPVPEEDEYGTAEFQHGMEEVEIPLTPTDPSTPAAATAVIPVVG
TPPKTETEEFGYADEAGYTLLQKGLFLAVILGCVAFYVRMNRRNKKFERSLV
>d2aa0df7-8136-4170-8655-f370317f09a1 (mRNA) 406 residues [BFAB_07:314322-316097 + strand] [peptide] name=Bfab07g00860.1
MDFSSEINRPTVIRKFALDKDHQPPKLITFQSVFLKNDQEKIRMTEASEAIIFKKLPLIQ
ILFDLKLNGMLKDDKDQICYDPEHARTERPVLPKVPGKIVYMYEFIQSNFQNRGQDYDQI
AKWNIGTLWTMIDCLVRFLDGKPLPLDSKMGLMKKHWDLELIGIEILAVYLGCIEMSDEA
VRNALISYMRRLPTPGSTNSKDSWERTFETTNHAKVFNGNKFRQPEIIDLTEDPIAAPKT
LEKKTQSATKSQMINIGQLVSVTKSLGIEPPPSSTLENSVQVAQSKLISRKSKKGSQPSA
TLQKSKNTIQSSKESHQTTTPQTSIEASRSNSARKGPQLMPIDAYISLNQTYGCFLHVHI
GSAMKGSGLIGRLLQDLHMGLFNTGDMSKVAGNNRNGKLCWFGMRF
>8c3ad956-f502-41ce-a070-21afa56abcf4 (mRNA) 496 residues [BFAB_07:316135-319013 - strand] [peptide] name=Bfab07g00870.1
MSQAKTKQSFRSFIWDNDTHLKSVEERKLLRKLDAAILSIGCLGFFLKYLDQNNLTNAYV
SGMQEDLKMFGNQYTYAGTFYNCAYAIMQIPSTLIIQKVRPSYWLGLMEIGWGTFTFAQA
GMHSVPQLYAFRFLVGLFESSFFPCMLFILGSWYTKTELAKRIAIFHMTAPLGTAFSGYL
QAAVHTNLNGRHGLAGWRWLYIVCGIMTLPVGFATIFLLPDTPHNTRAWYLTENECALAI
ERVEKAGKAAPVPITWAKIRRMFTRWRWYALVSGYILYGTSCAASSYFAIWLKSEKFSVT
SRNVIPSGASLISAFCVILWGFGADYSGSRFAFVIGPLSYGLTPNGILAVWPKSVKLKKF
AFLTDGVQIMTAVFYAWANEICAGDSEERAIVISSMNGLQYAVAAWLPIVIFPQTEAPTF
RRGFPATFGFVIAALLAILLIQFFHKRELKQQKKLNHEDSEATNHEEVFYVENEPTKGVE
GDGFREMATAGAVASH
>6e1f24a9-41b1-4285-921c-0633e5673876 (mRNA) 395 residues [BFAB_07:319513-321331 - strand] [peptide] name=Bfab07g00880.1
MAMRNLSLEPDDSDFVGLCSVLLPEIQKIVKDRRVLEDSPVRPFLEDILRHDGTLPVLRE
LTKVTKYPSVRRAHPDRIPSTKLSRALVSTFNKSIGQDEITVQDYVRNKRLNNKNHYPAI
QTTNRLSSSYFGTTIVVPPPRPIQSVPKTSKKPIPSISEILQMPPLKDRRVYFLKRHETS
DVPYLAQTEFPEFITVGEEKFFQMCPFAGFAFDVKRIGIFSDPDDKAIYDPESTRNRKLC
IGKAKIIYLANLIDSTYFREIRGSQSSYVTRILCGWSIEKIWLNTRTWVLFVDGKSFEER
ISSAAELDEVCMLGNFLGANKEATGLLRKWYRNHKLKDHHGNSSISGNSLANKRALQSDV
LPVEEEQSKRHRGNDYVADEVQNVTSDLGWRHRDD
>9365fb66-a3c0-4cf4-bdf0-7f9dd845f7b0 (mRNA) 422 residues [BFAB_07:324415-327314 - strand] [peptide] name=Bfab07g00890.1
MPSLSALAPLAGIVASIPSVMAGFDPTSQSNVAVYWGQNSYGQGSGAYVQQRLSYYCQNT
EINIIPLAFLSSINTPTLNFANQGDPCTVISGSTLFYCSELEADITTCQKTYGKTIMLSV
GGATYTEGGFTSTQAATSAANNLWSWFGPDTSGDIRPFGTAVIDGFDFDFESTVSNMPTF
ANQLRSLMDTDTTKTWLLSAAPQCPYPDAADGPMLDGTVAFDIVWVQFYNNYCGVQSFVP
SASIQNNFNFDTWDNWAKTVSLNPNVKVMLGIPSNTGAGAGYTSGAALASVIAYSKSFSS
FGGIMMWDMSQLYANAGFLDAVNADLGKPAVTVPVTTTTVTRTVTSTTTTTTTSTTTSAT
TTSPGSTLTTITTTSASPTSTGGSLVNEWNQCGGQGWNGGTVCVAGTSCVAYSIWYSQCN
PN
>744db7ce-d1f9-4820-ac6a-7afecc73028f (mRNA) 263 residues [BFAB_07:332891-334325 - strand] [peptide] name=Bfab07g00900.1
MDKQVPQTISGTEKKLIATSQAHSNVGDFEKRAQICDPKLTFDGIRQCEQVRTVLNSNRN
IRQIFCSPMTRAIETTLITFRDVMKFSMENSDIQTTAWDALREWGSIPCCTGSSIAKLQE
EFGHKMDVSLIKPGWEHNKEIFGDISRADKVKQSLFKIAKNVQELTRLGVIYDIRDGSFS
IRGQYYAPYEIVIVSHGGFLETMLEAELGGKASKFPFRNCFHNANLKSFSFETINGPGGV
RYGLVETKESKMRKYSRNPIPLG
>1fdb4ec4-c0a0-4a95-b110-194ead14c694 (mRNA) 319 residues [BFAB_07:335644-337286 - strand] [peptide] name=Bfab07g00910.1
MSAKQFPSSMFPLKNMEGNSVQIQAEYADRDPDNNRIQTASLKINLQTLKVSNGSPAKSG
NNNLNDDVDMSGLDHPVGGIINNLKNRRSRHKSHSSINTGQIHQQAQMARMLQPAIRALQ
SATDKAINKSKKISSQGEAFIGPILPSNVKKLRRNLESDSSRVRKENSTEKKRKRKEKRN
TVVNAPNTKPKKEKKKKDQAVNAKAKPSEGAIKKRRTRKSKEGKMDHMEYLMERRKLGDT
KALVLADKTARSNADEKVDLYGRGLNPADWEATYQQEYQARTERLRERQARDEQALMSAL
SGLSLVGTRIGGDDYDLIL
>1741806a-cfcb-469c-9184-7deb41e15b08 (mRNA) 207 residues [BFAB_07:337922-339461 + strand] [peptide] name=Bfab07g00920.1
MSKIQHIFMTGATGYIGSVITELAIAEGYTVHGLSRSESGDAKLLKAGAVPIRGNLTNLD
VLRRESADADIVLHLATDYHITKANASYDAAWPINKAAVEAIADGLEGSNKPLVVTGGTL
FVSPNPDGGETTETSPVDPEPINNRHQAEAHALELAKRGIRVIAIRLAPLGFWERGQWSQ
AIHGYLQACWRSDVCRWRQESHDHCSY
>5c2139c1-6e59-4a02-a3af-1c166349146d (mRNA) 612 residues [BFAB_07:341954-344370 + strand] [peptide] name=Bfab07g00930.1
MSSDGDREDQGEVSSPLDSNTIDGQEVKIKEEPFEEDTRVNQDIPLYDPAFRPDLESQAM
PSRSESPALSIRLRRPGRASSEMHAFTTAGVAALTNNRLLQARLNKLMSMPHSEDEFPDD
KLAQTSESQFDSQVHNAGYSQPNPAYPATFYQQYESQQHPAQLSGYLQDPFLPEYSNQFH
GSFDRKFPQSPYVEDLDQTIVVDSTMSNSSVPPEDFSASPTPTPQEEVFLENRAPSTPRA
GRQAKRESAKSRAHGTRTAGRRLRARRAEDFAPPPGAMTAADVMAVHENNIRRRNKRYKK
AGIKPPVLDDIEQDVVDTLNELGVPIDYNDMYLQQVYSNRDTTLDGSLDESADSTIDTMD
TDETIVPLPPSLPAEPDFPTSARWRERGPNGQARARWGSARLRAKKKVQKTEAWKEATKD
ERDAMEAAAADALVFIADPIPVGPVPPGSHAPWLRSERAFLLQEVTENSKRINSTGNRLA
AVAETYNRRMQYKTQKAGELCIAPGNGESRKNSRLTKDRTPPHRTDVAIMSSIKKWSELG
DICICRQHQRYPVGDFERSGDFPHGHGVKECIPKDRKDDACHCDDHLRDFNGEFPPGHTK
ARCSHLLIRSHK
>82253d53-5f9e-46f6-b604-5178b0d10833 (mRNA) 911 residues [BFAB_07:349092-353458 + strand] [peptide] name=Bfab07g00940.1
MAKSPSDAETGTLSNQEVLRRMSLAPGRERQNSLSDLDPRAAHPSLNLTGGIISATFCIQ
QSLMYRKGSDWTWSQRHGGSSQFDSFRYLASEKSPWHHTLVGWTGEINPVEDLTPPDTPP
LGGHPIQSQPPQNRVPFNKSSAPIPVDGVTMPPTPPETDGLFVTSDDRQRLERQLAHQPH
GKIVPVWLCDDADTSEDGSVCLKDQSRWRRFAEHELYTLFHYKQHEPTNGRQERQSWADY
YRMNQKFANRILEIYKPGDIVMVHDYHLLLLPSMLRQRVPHMSIVFYLHIPFPSSEFLRC
LPRRKEILEGVLSANLVGLQSFSYTRHFNSCCTRILGFPSTSAGVEAYGARCDVAAFPIG
IDARNVEQLAFNDPAVDEKVAALKKLYAGKKIIVGRDRLDSVRGVAQKLMAFERFLENFP
EWREKVVLVQVTSPTSVEEEREDSGNKIAANVAELVAKINGLYGSLSFSPVQHYPQYLSQ
EEYLALLRVADVGLITSVRDGMNTTSLEYVVCQRENHGPLIISEFSGSAAVLDAAIHINP
WDFNTVAENIRLGLEMPPSKKAELHDKLSEYIFSNDITTWTKSFIRTLITKIGSNSHAFA
TPLLDKTSLLLQYRAAKKRLFMFDYDGTLTPIVRDPAAALPSDKLYRTLKALASDPKNAI
WIISGRDQEFLGQHLGHIPELGFSAEHGSFMRHPGSQEWENLAEQFDMGWQKEVMECFQK
YTEKTPGSFIERKRCALTWHYRPSNPELGERMSRECQKELMATVGKAWDVEVMTGKANLE
VRPTFINKGSIAKRLVDAYGKEVGQAPEFTFCAGDDTTDEDMFRSLNNSELNVNHVFTVT
VGASSKPTLAQWHLLEPMDVISSIALLGGGDTNVADLGPVSVIEGKSREDMMGKIEALDM
IPGASSTGEGR
>3e67fd56-998e-4a26-a2d5-f8aa2b6107f6 (mRNA) 308 residues [BFAB_07:355394-357037 - strand] [peptide] name=Bfab07g00950.1
MSQEIDIDPNAYTLPFSLTKTIRRDPYPAILPSNPSNSQAGKIILITGGGTGIGSSAARV
WAHASALGIIILGRRIEPLEETALQIRAINAETKVLVIKTDVSIDDEVKHVFQQTHKVFG
RGPDVVLLCAAVLEPSRLVHEMGADEWWGYMAINSKGVYSCIHHYINTQSNPAHPTGTIV
VMNSASTSILDIQHPANGIGKLSAQRLVEFVDASYPTLRIFSLLPGLVATPSQQPQNLPY
ARDDPVMSGMLTLYLSQARADYLRGSTMSVNWDVEELEQFQKEIREKNLLKLSWIPILPI
GGGKGLAM
>c922dbf9-b65a-4444-b354-bef0e530b8d4 (mRNA) 348 residues [BFAB_07:357887-359719 - strand] [peptide] name=Bfab07g00960.1
MEGKNALLGTPVAFTILAVIAVAIRFWVRITHNAGLGWDDWLMLIAMVDQIVARVLTTIS
IAYQFRNPPSFQDQVNALKYNYIAGPPQLTVSVIARLSVTIFLIRLFGVHLWLKRYLIVL
MTILSLLTAGVIIISFAQITPVQAIWNPMVPVTKQWNPDLWLYFAVFNQTTSTLSDITFV
LFPAFIIWHLNMPRRQKFGLIFLLALSLFVMIMSILKTVWVVDSYHGSKTLEHYNQTAIL
TLGLLEGDMVIIMGCIPTFGRSVIDAKFSLLCPTILIYFGKFRSTRDASTDKDKSDRSYR
TSSNPYENLELSSRRLPLNSDHSLGNTKSAETRTKDISQDRLVREYEV
>c9310b51-c711-440d-894f-7568a6645869 (mRNA) 532 residues [BFAB_07:360206-362618 - strand] [peptide] name=Bfab07g00970.1
MTIAIMSWTMGTQLLLLVLLITVITLSRLLFHTFFQNKDEVDVWSKVEPIGVSSGGIFSW
TRAVIGSAFSYQQNTQDGYDKFCKAQNRPFILPTMWTGGSVVVLPPSLLHLTQKVYPSMA
RHQAKMDHLQLPYMISDHDVIDNLIQFDIARKKLRQAEVVSSLAAITEEEIDVAFRKYWG
TSETWTSINAWDNCTRVITQAGFRILIGLPLCRDESLLENARMYANYLFKGTSIINCLPP
CSRPVLARIISWPSKYYQARCRRILRPLIEQRIRGFQDHKAGSEKPDDFLQWLIEHCSKL
DAKEMEPDKISDRILVLCIAFVFAMGYIFCSSVLDLYKSSEKTSFVAGLVAECKCVSAEH
GGLSTKQAVDSLFRVDSALRESMRVSDVGATSIPIDIVSGKVDLGNGIQIPSGMRMVFAT
QPMHLDPDSYPNPLRYDAFRFSRKYEEIEKCEQELGERELCTTITESFLPFGYGKFQCPG
RWFATQTIKQALAYVAMNYDIEFDGRQYKRQALLNMMLPPEYVEMSVRRRRA
>d3d8b4f0-79fc-4860-a793-91c714a277fd (mRNA) 574 residues [BFAB_07:363042-365731 - strand] [peptide] name=Bfab07g00980.1
MENTATKSSSPEDDEKTVERNPSSSDSKIDGSRLRLETKPVDEVEYQVEYVSGVKLAIII
ASVAFSCFLVLVDNMIVSTAIPRITNQFKSLRDVGWYASAYQFGSAAPQPLTGKIYTHFK
TKWVFLTFFSIFELGSLLCGVANSSVMLICGRAVAGLGAAGILSGALTIISSCAAPEKRA
NLIGITLGLNQLGLVVGPLLGGVFTTFTTWRWCFYINLPLGAVSSIAIILLRIPEQTRKA
PIRTILPKLHHYLDLIGFCLFAPAIVMLLLALQYGGNQFAWNSSQVIGLFCGFAATIVVW
YWWNSRLGDKAMLPLSLVTKRVVAMAVLYQAFMMACLYGAIYFLPIYFQAILNTNAMLSG
VYLLPTILPQLFMAGLSGPMIMKVGYLIPFAIFSTVLMSIGAGLYSKLGPNSSSGKWAGF
QVLSGIGSGAGLQVTIIAIQAATTGEELSSAMAFLIFGQTLGPAIVLVICNVIFDNALES
QLPQHAPHINATAIIDAGATGFRAFVDEADLPGVLLAYSNSIDRAFYLVAAMGVMCGFVL
WGLGWQNVSIKATDEQNGQDEKVKESTENGITKA
>f6e894f0-da91-49be-aac5-b9f752eaa38f (mRNA) 382 residues [BFAB_07:366796-368755 + strand] [peptide] name=Bfab07g00990.1
MEAIFGQIRQIANKLGDTAKSSLIRDLHTLAHSLESVDDTVKRISHLHEEAAVIRVGIDL
KLFDILEARRAPLSLDEIVKTTGGDSQLIGRLMRFLASVAVIEETGKDFFSATNVTKNLV
VEGSQAGVCHGFETSGPMYQMLPEFLKKTNYQNPKDPFHTVFQDAFNFPGSAFEWFGQNP
KNLRYYQEYMAGRRQSVQEMWMSVYPIESETKELDPKAPLLVDIGGNIGHNCVHFKTMFP
NIPGRIILQDLPENIKAALSTPGIEPMVYDFFKPQPIKGAKYYYLAHVLHDWPDDKCREI
LQNTKAGMGENSVILIDEMILPDTGVSMNVTTIDLEMMCAHASQERTQSQWDNLLTTVGL
KRIETWVYNAPVYESVMKVVQA
>9cd9311f-6a81-4ce2-944f-9dee17a4f9a4 (mRNA) 306 residues [BFAB_07:368751-370344 - strand] [peptide] name=Bfab07g01000.1
MAPRLAFIGMGLMGQGITKNLVEKGEFEKPLILYNRTRSRAEEQSARIGHSIVSSSLSEV
VSKADIIWSCIQNEEAVTEMFKSLSSFDIRGKLFVESSTIPAETADSLSKQILDAGAEFV
SMPVFGEPSLAYAGNLVCVPAGPRESVARIKPHLVGVVAKAIIDLSGESPGKAALLKMIG
NVLIVSTMETVAEVSVLAAKTGIGNSHIQELISNYYKVGPTIYAKKMHAGDYYKHEPMVE
TSKAIDLSSKVLELAASVGVPLKGYEVGIEHMVAARDYAGPKADILSIYGAVRMESNLKF
QNSDEK
>578e2d67-5b1c-441b-bd0f-72734fc244dd (mRNA) 932 residues [BFAB_07:371065-374597 + strand] [peptide] name=Bfab07g01010.1
MAPANIISILRLCASRDDGHGIVTYPLGSRNSVKTLYKDLEFQVIHNARLLSRISNFRPR
SIVLLHFTDHLDNIVWFWSVIAAEGIPALSTPFSNVETQRLKHIAHLHNLLKAPLCITRR
SLLDQFSDQDILKPYIIEDIFSAQVALENDTIDELGRVAREEYPEDLAILMLTSGSTGNA
KAVCLTHGQIFASMAGKSSVRKDIPKDFSALNWIGFDHVANLTEIHLEAMYLNIDQVHVQ
APDVISNPLFLLELIHKHRVGWTFAPNFFLGKLRKQLDTVVVDTSLYLDLSCLRLLVSGG
EANVVETCDVLSRHLEKYGAPSNVISAAFGMTETCAGSIYNLDCPGYDVHNMQQFCSLGR
CVPGIEMRVTIPQAGDEIVRASANELGLLELHGPIVFKSYFNNKSATTASFTPDGWFRTG
DHATIDRAGMLHLAGRTNDTMNINGVKYLPNELEAAIEEVGIEGVTPSYTICFSFRPLGA
ESEQIEVVYLPSFGPQNVDARIAARDAIIQVTMLQTGSRPSVLPLNDALLQKTTLGKLSR
AKIRAAFERGDYKKCLEFDKMQIEIYNSSHMQQPCTESERIIQEVFCEDLDLHPQEFGVN
THVFEIGITSIHLIRLKQKLQSRFSIPEIPIRMMMQNSTVRELATALENLGKPRNYEPII
SLQNNGKKAPLWLFHPGVGEVLVFLNLAKYLPDRPVFALRARGFEKGETFFTDIKEAVNT
YFEAIKSKQPKGPYLLAGYSYGTMLAFETAKLLETSGDEISFLGSFNLPPHIKFRMRQLD
WTECLLHLAYFLSLIDVEHCEIMAPQLRQYSKKQAIQYISKVANPNRLLELSLNEEMLGN
WVDLSYRLQSMASNYDPSGTVAMIDIFVADPLQAVAANREDWRKNSLSKWADFSRSKPRF
HDVMGEHYTMIGADHVFSFQQTFRKALEARGC
>dc775c42-5a77-4289-a825-c1357e7f2cad (mRNA) 436 residues [BFAB_07:375611-377426 + strand] [peptide] name=Bfab07g01020.1
MSESLLSEFPQGVSDAIQYERSLWAHSAEEDAAFYSVSGIDMASAQPGTPIKVQEDANVP
QNYTLPPNTAVSRFIYVSESLSGERRPVSGYVLWPYMPRLDANGGNQVVAWAHGTSGTTV
STAPSKFKNLWNHFIAPYQLVLQGYVVVATDYAGLGVGKDQNNHSIAHDFFASSSVATDV
VYSVQAAKRAFPQLSESFVVLGHSQGGGATWGVAQKHAVSKIPGYLGAIAISPATSVLDN
PEPFGSLIAATMAPGIAALYPEFDYNDFFTPDGLELFQKIVKLDCASSTTIPILLTLAGN
LLKPDWTSNEWLLKYDNLTANGGRKISGPLLVIQGDNDPMVNYNNTVKKLGAALDLSPTS
HVQLFRLPGTSHTPAVTGSQRIWMDWIADRFSGVPLQPFDKNASFTSVVTPARNLSSYVP
ELNWFVGPATEPYQTP
>0a9ba1ff-0e2b-49ba-8f23-fd655de7a3ee (mRNA) 286 residues [BFAB_07:378795-379987 - strand] [peptide] name=Bfab07g01030.1
MARTQATSFIVLSDTHDYQFGDNASSKLQLPAPKVDVLLHSGDLTQVGGISAFKKALKML
SSFDAEIKLVIAGNHDLELDEGWCKAHLEEDEDYLDDHTRAMEVMKGQLAKEAGVTYLEE
GTHTFNLKSGATFKIYASPYQPEFNDYAFPYKRNEDRFNASGETAEGVISIAENPIPAGV
DIVMTHGPPKGFRDENLGCENTLRAVQRAKPLMHCFGHIHEGYGANKIVWDDEKKAKDDL
VNKYPQAMDLHIESGKETLMVNAAILDGEHQPTNAPWIINLELPSS
>da8c3cdf-e67e-4b36-ae11-1e888b0d1c14 (mRNA) 831 residues [BFAB_07:387634-392551 - strand] [peptide] name=Bfab07g01050.1
MSTDPQSTREPAAGPRSGPSFLPTNIIRINDLNGSEVEGAFGGHNPQESAVTTPRPNTAP
NTQPRPMHGSEDATTPTTVTFRPASDALANQRPLPQAPFDVAATIPETVAGLTAMNRDNS
TRSNNSVGSEDVDMDKSDAASSNGNSPRPHKKKKSQKFYCTDYPPCNLNFTRTEHLQRHI
RKHTGERPYECFCGRYFSRRDNLRQHAQTVHQKEEIPPGSLAATSTRFPRQPRTDRSKPP
GRQRAATVSEQVPSYRGHHRNSYSTSSIMSNMSHVSGYSQAHNLRRPLALQMPSPLTRRP
SSPGGYSTPTSATFSTGQNSPRWPTLGFQSSPGPGVGVPIPAGRIYDGHHTPGRRLSTPS
AANPFSPSGPASNPFGTSSTYSAAAPYSPSLISSPTNSTFNNAGQSMAAHHSDMDNRRRT
WHQGTNAATLASFTTRLHSVMNANHYADGPIPEPAAILRSNAPPQEHARLPGISSLLPGR
GESPPPLRSREQMMIDRPHSYHQPSLSMTERPRENPVDRPASYYQPISDMANRGPSQRMI
DRPPPYYQNNTPMSDDPRPSQLMNDRPNSYHQPNPIVPERRPSQIMTDRPSSYYQPRHSI
SESVPYSSSRPMTSRDRPLSSHLDRQFNQLEIQGPPHADAASWATETARAVHATAQQSQA
NQPRVTFEQPALGPRTGASSSYHHKHTASLPVNMHRSNRRDGWYNGPVVYQQTSDNRFQG
TSPEGSTGSEGAAPITPQSATATDYNPAVVRSNGYHEEHSRTVHPQQPTVHHYHTLSNGN
EHSYTHKPPTSTQTMYPQVPQSSTQHYRTEGLDALAAAATSGQISVHNNAF
>c02c89a3-d5bf-4a91-aa34-a3197fba5ac9 (mRNA) 1315 residues [BFAB_07:397028-402098 - strand] [peptide] name=Bfab07g01060.1
MVTFEHDACEKIPLIRLPTAMPAEFSSETPIRVSEVHRVREVYKYLPPFAAPPIPPREQN
DKNAESSKNYPKAFSSSDRALNAFAQLGALRLRARRAMISLVDRTHEYILAESTKTLSSQ
NDDVHDDGDSLWLGLRTIPREDSLCAAFINTPRSESQRNDTEFRPKVIPKVINDLSGETL
RFDPNIIGCPKIRFVATVPIRSRQGFDIGAYSVFDDIPRNGLLPEELEFLTDITDTVMEH
LENIAVKRDHQRGEKMVKGLGLFVEGHSSIKSWWLRTRNDRETSVRGKDSYAIRSVGNPT
IPTEASLENLAIAGPEANSSSANRFQKMEELTSLLPTSSSPPSNLCNGLPLRPGGEHDES
NNHSYVQVRNISPCFKEQLDQPSTLNSPIHSPQIPLDSPSNETPRSSLSKSLDQAHTPMT
PRDTTINDVKTRSPSEKAEVLKRMLSRASNLIRESTDVEGVIFFDAKESSFGRQSSLNDQ
ERTAGLHDAAQISSSEDASRTSSRHDTSDSVDGRDSDRGPEVKAQSSQTRMCEVLAYSTA
SRCTLRGDASFPEHLTVKESFVRRLLKRHPHGKVFAFDEGGHMSSSEDEILDAASTGEIS
IVAETSQNSICQKASSKVMEGRTMLQIFPGARYVMILPLWDSHSERWFASTMLWTSDPTR
VLSLDDDLNYVAAFGNSIMAEVSRLEIVASDQTKTALISSISHELRSPLQGIQGSIELLQ
DTQISTYQRSALETIGHCSTTLLDTLTNVLDYAKINNFTTAQKTEQRVVRNSSNRRRAVP
AEKFQIYGTISLTSDLDIASITEDVINGIYAGHIHVIHSNPHYTYTDIDYLNSPTNSDFQ
GTKDSAPLTVILDVDHKSNWTFLTQPGAWKRILMNIFGNALKYTTSGLIKVSLGCKTVTS
KNSRVNQALVTLTISDTGRGIAEDFLKRQIYTPFAQEDSLTPGAGLGLSIVRQIVGALDG
KIDVFSIQGTGTVVNVVLKLDQSQPQFGDLPRMPNNIEKARSYTHGLELVLIGMEISPPE
PERKAGGESSYDISVGPAISRMARNWFGMKLSEAVGLDAMSADVFMVTSEKFYELEDHWK
TLCSETTGDTHKKHLIVLTGFEQSERRTLFKTHQNIHFLSNPIGPKKLADCFLSIFERSS
SRNNNSFLTMPPNPRRTTSPALNTSSAKPEHNRSLSEILLTTKPIALLVEDNTINMKILI
ACMKKLSVQYYCAVNGLHAVTTYQNARVKPDIIFMDISMPIMNGFEASRKIRGLEKREGW
KASVIVAVTGLASDESQREAYSSGINLFMSKPVPLKELEKIVVEMEKESERRGSG
>dcdbd6bf-ef4a-4b52-83d0-90c34bbc8aa1 (mRNA) 471 residues [BFAB_07:402569-405539 - strand] [peptide] name=Bfab07g01070.1
MIIITILSFLYLALPARSATGQASNFNVSIVELQSYGCNASCQAILSISNTADLETVGTE
FDFDFYSTANNFSSSTPGDLLKLQPVDSSALSIPDGIATFRFQYTSIDLDGSIVPSGGFI
AFPFASPANGSQLPLVAYAHGTIGVHRGCAPSSSPSLFNYNSWAQLMYSGYAVVATDYAG
LGNNHTLHKYSAFTAHANDVLYSIQAARKAFPGVFTKEWASLGHSQGGGAVWKLSEHPLI
QNHTSGYLGTVAISPASKIFDMAVETFERIVPRPGFHQFVVTAELGQVIYGLKAIFPNYT
SPFLAYGLKKRVELANVMQSCTLAFMGLSLDLPRDQFAVANGTPANDELFKKFQDMNAPA
QGDRASKPILIIQGWNDTSVLPQSTLASFQETVKAGNVAHLVRYPGLDHSATITASTPLW
LKYLAELFAHKKQSHKSSDTTIVPFNLDVAKTPLELPLNEEPLLSLLGRGE
>e9e25daa-0734-42e4-b591-e5b39b7cb4a6 (mRNA) 537 residues [BFAB_07:405675-407744 - strand] [peptide] name=Bfab07g01080.1
MGSVFSLLRDGYFGILGLIAIIAESNKAASALLDRITQVKFPHENPTSSFWEQQPLHPEL
VNIQSEQLAPRADIVIIGSGMTGASVAYTILNECLAIARPVKVAILEGRTICSGATGRNG
GHIKVAPFYEYKKFKDRFGAASAQKILEFYLKHRPFLLNLSREEGLKEGEARDVTTVDAF
TDAERLKEATEMLCILREDLPELAKGIEILDGETVQKQFGFSSQFHGGITYTSGALWPYR
FVTAIYAALLSIFPEQFSIETGAMVQSIQTTSNPDSPFLLNTSRGDITAAHVVHATEAFT
ANLVPGLVGKLLPLRGYMSAQRPGKSFPHYDGKTSWSIVGSRDYEYITQRPGKPDATDGL
GAEIMTGGGSVHMDGTGLNEVGQWDDDKIEQPIGSYLAGVLPVSFRSSFWGEDANGSIVK
SMWTGAMGLTCDFMPLVGKLSPSLTKRAVNLGNKQVTANTNAAPAEWIAAGFNGSGMVTT
WLSGVAVALQVLGRENVNSNGQIWKPDGVVSDWFPEEFICSSKRVARSSIHELPRLI
>78742ba7-735d-4b84-a6d0-59d53b7cd15b (mRNA) 737 residues [BFAB_07:409113-412127 + strand] [peptide] name=Bfab07g01090.1
MKVSHPLSFFSTIFLSHLVAAGPLWRNGTSRNFIRGGEMKRDSVTPIAITILPGTVTSSI
ISSTAQAESTLSIEGTTSSSTTDFTSQSSSTSATSIIQSTEGSKTTESKSETSTSSTSSD
KDSESRTPLSSATSSQLASSIISSIGGTAPIRSSKFSNTETIDGSVIPKATELTLTLTPP
LSTTSTGKSSTKTETSSQGTSESQAGSPSSSQVSLQTTTFAPLPTSLPESSLTAKASSVS
LDSSTLSSLNSVQTTTFPPLPTTSPKATTTPESSSGETFEGSPSATSSFVPTLASSISVA
PFGTGNSSTAATGDPQSSGNSDPSFGSTIGITTEASGITSQTSIRETLSPTTVSSSTARA
SSLVESVVSTKETSKVTAQPQSTIVQSSVVATQDLGSTTGASDQSITSQTPITGGLSQAT
SIDSLQTTFVYVTTVVPSSTLGVIPSSSFLSKTSTSSTQVETTKLESSTSSLSSAAITIK
TTEVSSFSSSSEPQTTIFPELPTTQPASTAEILVTTVTLSSKTRESTSSTTKISTATSSI
KETTTQESILLPTTQITTADIPKTTEIASTIIISINTADSNNGAVTVLTIIPVTAGSGSG
SGNDIGITKTNDGNSGATTSITIINTSPTATTTAGGNGLAQTTPTLSPTSPTPIRTSISI
STSAIDDGLRTTTLSISPPKETIITSAPAVTTTSAAENICLGVGGDGKLTSMSSCVGGAT
ETVSVTVTARETVTVRG
>eecc58fc-621a-4542-82e9-3f7dcf2d50e6 (mRNA) 334 residues [BFAB_07:412317-413736 - strand] [peptide] name=Bfab07g01100.1
MGFNQRILHVFKRNRSFTYAELDPSHVSSDNEYQDEDRLLNRLSVGDDSFEHAEKGETNC
CHRHHSFVRCLGWLNGLFFCLSLYLFTAAMLNWKQVPGGRERNWALKQVSEKSPILDAIE
IPLSTWRLNGTFLEREDESIYRKPPSPEVDAAWARIETQNPIPLSRQDLVNQGKDPDMYA
KFPESFGFGPDAFIGRIDVFHQIHCLNRLRMHLYWNVAYYYPDEQMGKYHQLHASHCVYA
LLQNLMCQGNVDTYGHYWVDMQENAVPDFNINHKCRDFEAILEYHDEIAVPLEEFGALRR
PLNEPVRHMSHEAKEIFRWFDNHEDDGQDGMEIL
>05e629e6-a875-4d1b-9122-363e2d744ea3 (mRNA) 534 residues [BFAB_07:417823-420263 - strand] [peptide] name=Bfab07g01120.1
MADVVQNITYASPVADAKLAQIIGHPQLNSYLAKLAEVSAWQIVLTILCLMVAYDQCSYI
WQKGSIIGPAWKAPFIGPFLQSVNPKFHEYQAKWASGDLSCVSVFHKFVVIASTRDMARK
VFNSPAYVKPCVVDSAHKLLGETNWVFLDGKAHVDYRKGLNGLFTRKALDCYLPGQDDVY
NQYNERFAKVTEEAGGKPVPFMSEFRELLCAVSCRTFVGFYISDEAIKKIADDYYNITAA
LELVNFPIILPFTKSWYGKIAADMVLEEFSKCAAKSKVRMAAGGEVSCIMDGWIKSQLES
VAWIEAEAKGSTEGMTKPTPLLREFTDFEIAQTVFTFLFASQDATSSAATWLFQVMAQRP
EVLDKVREENLRVRGGDKRVRPNMDMMESMKYTRAVVRELLRWRPPVLMVPYVAKKAFPI
TPDYTVPKGAMIVPTTYPALRDPDVYDRPDEFDPERYFSGDAEVKGAKNYLVFGTGAHYC
LGQEYAQMNLALMIGKASMELDWVHHPTPKSEEIKVFATIFPMDDCPLTFTKRS
>479352d8-cb9c-46b9-910b-6b25ed626d6a (mRNA) 193 residues [BFAB_07:427165-428091 - strand] [peptide] name=Bfab07g01130.1
MSTPRVSRTLARAFQSRMGASSAKCYTMSHFSTSSRNSFSAQIRDGGLKSTGILGRESAR
HSRQVRSYSQESEAKSKYYTFEDMQKLTSAPHPDTHIIDVRTPLEVQQTGRIPSAVNISI
TSYPDAFSISEEEFEDRFGFERPGKEEHCVFYCKAGVRSRAAAQIARGNGWSNVGEFEGS
WGEWSAMGGEVEK
>5bf7d6bd-2148-41d2-9162-f455f729fcd7 (mRNA) 287 residues [BFAB_07:428467-429830 - strand] [peptide] name=Bfab07g01140.1
MSGAGYDVVVDVDEEGDLGHTDLQEDLSFHNSNFENNPSSSRHKPTSPGLPAPATAGGPN
TSKRYLWSLHFYSQFFDVDTSSVLARCWAALYPRANFLDVLEGNPDLYGPFWIATTVIFI
LFMGGTVSLYLAERGEGRFAYDFGLLSGAAGLIYGYTFVIPILLFLALKYFGSESANLLE
CAALYGYSNLVWIPVALVSWSSFTIMNWVFVGVGFGLSVAFLLRNLYPVLSATDKQTSKI
LLILVVVLHAGLAIAIKVLFFAHGSPVAKKPEAEDPAKGADPSRMLF
>4a5b5cf9-1a15-42a5-a59a-8fff1710578f (mRNA) 565 residues [BFAB_07:431736-434017 - strand] [peptide] name=Bfab07g01160.1
MSSAIDYHKFRRGETCSEEGCRARKFYIEDGKKFCQRGHEQAGFTQTQQDEDDWNQQGKK
SRKRREEKEQVEKVFGGRDATQLYLQCYQLILWKQTHWLVTVKGFPKELETIVRDLWELR
LRVLQGSGDERSEYGTEFGSTTEGDDTDTDGTGYRSTASTVMSRKRASRAKKNLPKLIET
LGFCYLGILLLRLPTSLGEIYRWATRDEILYTRAIKEIPKEMRSRLPGHYFRALEIHGIL
NGHRLHQTVLDMVSFFNFNFEMVFPPINHKLLLYKSVRDLGLTVDIYMAVNHLAEILEYN
FSYPIHNKRLHGTTGYPEYQLASLIVIATKLSQPFDDIQRHPEGNLDATAARINWAKWQT
IMFNNPIEGMKRGDEIKITDADVFNMTGEQMDDWMDWYHKTWIDDRDQKVPQQILELFPL
PDIIPETTMGIVDPDPINRAKEVHKTLTLQKPVARVDDGGSQDIVRPGEKYRRYRTVEEL
PESAKAFFEIAARNIGTSIEKMVHGVFTTEIQLEKWMLDERRKELLEQESEEESAAQEMT
HVVGMDREVGEEEFDEGDVDSPLKE
>52971f1d-ced7-4fae-bb14-41d1e7e07e59 (mRNA) 165 residues [BFAB_07:434095-435308 - strand] [peptide] name=Bfab07g01170.1
MSGEAPVDDSQHEHTFDSADAGASTTFPMQCSALRKNGHVVIKGRPCKIIDMSTSKTGKH
GHAKVHLIATDIFTGKKLEELCPSTHNMDVPNVSRIEYQLLDIDDDFLSLMSEGGDTKDD
VKLPDGEVGQKIRALFDSDKDTNVIVLTAMGEQLAIDGKEAPKSG
>70481d4d-06f5-411b-a84b-65b48c317d70 (mRNA) 671 residues [BFAB_07:435972-438505 + strand] [peptide] name=Bfab07g01180.1
MWSLDRLSGHTTPSASPPPPLNRIPNLPRRPSHLVPSPVGGRPPFNPRSSSLSLISNDSN
SSLLSSRRPNGSNLKQAVTSPNVPDPLEVLGTLLDNGEETKLPSAKSPGATNGTVAPIEE
EDDEGEWDFGGLSLQHIVAGEPLDVEDEHVYKSQTLEEYEREKEKFEDLHRSIRACDDVL
NSVEINLTSFQNDLAMVSAEIETLQARSTALSVRLENRKVVENGLGPIVEEISVSPAVVK
KIVDGAIDEAWVRALAEVEKRSKAMDAKSKEQRTIKGVNDLKPLLENLVSKALERIRDFL
VAQVKALRSPNINAQIIQQQHFLRYKDLYAFLHRHHPKLAEELGQAYMNTMRWYFLNQFT
RYLKALEKIKLHVLDRYDVLGSDDGSRKATLLSGSKQTGPPHDAFNLGRRIDLLKTPNQT
ALPSFLAEEDKQTHYMEFPFRNFNLALIDNASAEYSFLTSFFSPSLSYATISRHFNYIFE
PTFSLGQSLTKSLIHESHDCLGLLLCVRLNQHFAFSLQRRKIPAVDSYINATSMLLWPRF
QLTMDIHCESVRTLTSALPTRKPSASEQAKQSAAPHFMTQRFGQFLQGILELSTEAGDDE
PVASSLARLRGEMEAFLTKCAGVMPDKRKKERFLFNNYSLILTIVGDVEGKLAGEQRAHF
EELKKAFGDGV
>33f2599a-839d-4543-b030-0bdcf791a799 (mRNA) 420 residues [BFAB_07:438467-440302 - strand] [peptide] name=Bfab07g01190.1
MESNEQPIKEEKSSASSSRASSRSPSHSIKEKQPREPTEKEVKILEACKWKDLEAIRELA
TSKDGLISDEVRRQAWPILLGCDDKHGDTKGNLTSWRELPKHGDEDQVALDVNRSFIYYP
NDQTSKEIGHRKEELSDLIIEVLRCNPYLCYFQGYHDICQVLLLVLPPATRTPSVARLSA
LRIRDFMLPTLSPALAQLRLIPSIINTVSPALCTHLSQTQPFFALSGTLTMYAHDIQEYG
DIARLFDVLLAREAVFSVYMFAQIVLSRSEELFETPADEPEMLHSILSKLPKPLDLESLI
SNTVKLFEEHPPETLPSWRWISSSSVLKTARWSDQITKQSLSDGQRYFAQQVKELQWAAK
RDELLKMMWRYRRPAKAIGVAILVGIFSYHCLPRSNVTGRRWTSAVGLFWELMGGGYNVH
>c9f6564f-b43f-417b-928d-979973666344 (mRNA) 1367 residues [BFAB_07:440399-445823 + strand] [peptide] name=Bfab07g01200.1
MAFPLQTQVLVDGQWVTRTVDTHTLLQRYNQMDDREVDHTMETIRPPVRGVLTQTIVPSP
LVHWILPIRIRGQEYNDVAYIGDTFVEIRRLGVGPHLFEVIRKDDFGSRIRNATVLGSLE
DYEKEQVCVKEEYEDNDMINFSTSSDSPSSSKSLLPPQTLVLQLETDTSSDSVFLTLHQS
GDGSWKFKSSRRRLSRAMDKLQPGTHLSIDPSSKYMVIGCSEQCFTVQALKPRTELSLQH
INGEELQFIESEKIILCKGAILKLEFLHPPAGSDNDVILLLIVTVNGKIKMLIYSWRAGD
PLSTIKSRNSRGKKGYALMEMPLLLIPLRFQSAFVLVNKNSMVAYKGILEGAPECIPIGT
SPRKPLDLYQGSDVPLWAAWAKPTRLPHYIAEYDDIYLAREDGWICLLQVNHDGEDLDLA
ITDVGDMQCNIGKAFACADYSLDPDVHRHGDVLVSGGDASIGGTYLVTARAQPNVKKDTQ
NWSPAMDLVVIRKNSKPNSDINTRIQSFVPSPDSIFVCSGKGALSSITELRSGIEAILGL
DLEFHSAVTKAWVLNSETYSGSAGGDDWVLLSLEDRSAILQISLDRTNAEELDPNHITLD
LMSRTIAISFCGNRAIQVTERSIVVLDSGNCTILNDLDVMGYPQAPPISASFINDAIICN
GKVLFTTHYEERRLLRILDTAIDESTSPPTILYYPKTVIEWTHDDGEVTCIAMYLHPQDH
QELIITGKRKDGEIFLMFIRRGEFHLRVPTTYEGCSYDLRALASILVIPSSTPDSFTLLC
GTLTGLVISLEISQVGQDFHIHRSCCVRFGGSVAILTQAEHSSYLFVNCDEKIFKINLST
VSSDGNSPRKQTTRMTIGADQIWLVDALNTTLQQPNINSILPLESESLADTDLLLISYNR
LLLARMGTKQKTVPRRIPIRGTPYRIIHSEIRNAFVVGASIDGRSTLYFVDPETGEDLSD
PRVKKNGPQTSFVAGLGRFDEKILCIYEWLYCHGTSIWNFIVVCTSGGRVVIVSTNSDDT
PLTHSGRAKISFWQTTQFKNFTSVYSVVGDSEGLYYCAQSGNEVKLYYSTLNRAERKFNE
NVAEAKLLSPATSLSYDAGKIYALTRHHSLQILEVIKTDGTVHLRHTHTDQLQHESLHHM
IGRPNPLGGSDSSQIDLVSDRSKSVIGLWASSGLKVDTLDTIFEAQLPASVIRFRSANCR
PVWDASWKVHKVGDYIEDPTRLHGLGAIFNDEMNSETLGLGIDGSLYHFTTLDVRAWQFL
KYVANLAGNSGLVGGRPLDKSADLEPNQTPANMQVDGDILKRVLENHKLEEMFGIGHRQT
DENRRQFKRFCMLLESMHGGKLETNHGPNVYIEQAYDDLGVFLRPVI
>6a4685a1-5bb4-4763-ac6f-410df57a733f (mRNA) 1056 residues [BFAB_07:446186-450043 + strand] [peptide] name=Bfab07g01210.1
MAPKKKNNKKQNDDWEAELGETVEPVKATEPDANAAEADPEEEFPAGGLMAMMRKKQKKG
KKGKQMEDFVEGEDPPAADEQPQDDFADKAPVEASIDDEFALPEKKGKGKNAQAKSAKDD
DAGDDDMGADGKMLTKAQKEKLKKEREKQRKKEQAALKKKTTPGGKSAEPEKPVEEEKPV
EVAPTPAPGGKGKKIPAALAKLQKQQEELRKREAERAAAIAAEKARIEEEERREAEEEKK
REEARALRKQKEKEKIEQQKREGTYLTKAQREEKLRNEMKLKQMIDAGVKVGGGEGGEKK
KVVYGNKKKGGKKNPAEIKADEEKALAEAAERAKKEAERIAAEAAAKAEKEAAEQAAKQS
KDESELEDWEAAADEEDEDVKDSWDADSDEEGEKKAVSSLPVRKKEEEDSESESDSEDDD
SSEDEEATARELAELKRKNEAAERKRKAHEAALAARSKDNLRSPICCILGHVDTGKTKLL
DKIRQTNVQEGEAGGITQQIGATYFPVEAIRKKIAVVNRDESFDLKVPGLLVIDTPGHES
FSNLRSRGSSLCNIAILVVDIMHGLEPQTLESMKLLRDRKTPFIVALNKIDRLYGWKKVD
NNGFQESLALQNKGVQNEFAKRLADTKVAFAEQGFNAEVFYENKSMAKNVSLVPTSAHTG
EGIPDMLKLILQLTQERMVGALMYLSEVQCTVLEVKAIEGFGMTIDVILSNGILREGDRI
VVCGVDGAITTNIRALLTPAEMKELRLKSQYVHNKEVKAALGVKISAPGLEGAIAGSRLM
VVGPDDDESDVEAEVESDLGALFSRVEKSGRGVTVQASTLGSLEALLDFLKVSKIPVANV
GIGPVFRRDVMNCGTMLEKQKEYAVMLCFDVKIDKEAQQYADDQGIKIFTADIIYHLFDS
FTKHMQVIAEAKKEASKLLAVFPCVLKPVAVFNKTGPIVIGVDVVEGNLRLHTPIAAVKQ
NSVTGSKEIVGIGRVTSIERDHKQLEKCKRGEPSVAIKIEMGSSQPTYGRHLEEADTLYS
LISRKSIDTLKEFYRDEVKKDEWALILKLKPLFDIS
>5c23aa35-da57-462f-98fb-00c64496d6d4 (mRNA) 1020 residues [BFAB_07:450323-453860 + strand] [peptide] name=Bfab07g01220.1
MGSKRKRSAQDAAVAAPAAKKQQKTSKPATKKPVETPVLDTSPFVNNPRGDDLKREVSLY
DMLSSEDDSQRLDAANAIVSGLLGGDGVEESTLQKHLERRLFRGLASGRKGARLGFSIVL
SELLAQLFGSANLSATKYPGLTFDNVFEFLILKTKPEGDLSGQEQKDHALGLLFGLQCFV
RSKILFSIDGKWELVLDKLLDLSSKKSWTREECGWVIMEALEQMNQDQAESTLKKLCDVG
LGLSPEGVGIWLRARDKFPKMKFPSNPWGQSGNPLEHLNSLAKALKESSSSEETSSKGQQ
AKQTGTWNAKLHFVWDIVLSQYVKAANNKAKNIMSEFDKFWKVTVDENLFSASASRERKF
WGFLVFQRMIQSHISCTKLITSIFSHNLVRCLINHVQEKDRFLNRAADKSLKVLTHAVEE
NPEALVVVLQGLIDGNGAYSFDRVTKTKTIEKLLSMVDDTNGEAVLDVLTSPVLLVPSSE
TNDAEKRRQMFGDYVLTAIRHVDLTEASQNSSWIKTAALPQLASLAYSNNSEAKPPISEG
TRTLIRNRLTSAFTHLLSNMDGYHYPCDLVISCTPDAVAMDGLITGAKDAAFTTLQKLMK
KAKKGGKDKATFQTLSLLYALVIFQLYNGDVEAVSILDELKLCYDNLIKHKSIEDSEVAP
FEVLVELLLSFLSRPSALLRKVTQHVFTAFMGEMTEGGLKLMTDVLETSENMRGQQEMFD
ENPDDEDAMDVDEEDDEMDSDVEVVDMNGEEGHLNAHLAEEEEESDEEDNEEESEDDGDE
GDDEANKELNDALAKILGTSSLDQNEEDEDGDSDSDMTDSGMDALTPKLEEVLGRMQKKG
PSKKQEQKDAKENMVNFKSRVLDLLDIYAKKQASDPLAAEILLPLLRLIRSTKAKHLSDK
AFSIIQAFAKSKSKASSSEAEVEINVKAQIALIKGFHEEVLKDQSKVFAKAASIASLSLA
SGIYRADKSQFEKIGKVYLQTMTKCDVEGVKIQASFVSDWVNWWQSHIAQATAGSAAKEE
>b78005f6-b764-4d19-9db1-95b68b8d7d38 (mRNA) 729 residues [BFAB_07:453936-457559 + strand] [peptide] name=Bfab07g01230.1
MASDNLELPGLSEPFEENETTTLCELCNSIISHHTGIGSETSVTPEFKLSEEETPTMLLI
LNGAQGGCRLCAVAWRVFRDGGTYQNFCSNNDTNALSLNDIAELFVISYLHLERSKDISL
GLYKLSYKIAYEKTNWGGSGILVLVLDTFEGSQDFHKASESHTDTNYLSEERWRKFCYSS
IRMCQRTHEICNSAPISDKASRCLPTRLIDVKKDPPKLILSSSAEPASSYAVLSHCWGRA
PILTLTTKNLEAFQQGLPISQLSKTFRDTVDVGKRLLRDFNVRYIWIDSLCIIQDSKSDW
ENEAPKMSQVYGNAFCCIAATSATDGSKGLFSPRNSMVEEVIRINIDRSRYPYLPSPVSI
TILNKDKWLQFIREAPLNQRGWVVQERALTKRALQFFDGEVMWKCQQRMASETFSAIKSG
LKIPDDRLLFPQSLTANFNFREFWNQLLRMYSKTILTYPDDILMPIAGVARQFGEYLPTN
NKAYLAGMWSFELERQLGWRTTSPGSKFDLDRRGSPSSNVAPSWSWASSTGRLISTAWKN
SSNEDRVSSVPWYDWTPAEYKRHMITDLSQVQPPQFTIIDVGTTLSTKDPFGSVTSGFLQ
LRGQLKVGRHSFTLSKDNLATWNNKNLHYIQVLGRSYLSPVVFDRLQSDDELREIREGML
FVFPLHFKTIRNSRALILKPSSVRKSLVRVGCLLQIPNIIDVDSESDKLIGEEFYEEYHG
NGEYTIRII
>32968abf-0d12-441d-94d2-cc5abddf9e5d (mRNA) 275 residues [BFAB_07:458162-459550 + strand] [peptide] name=Bfab07g01240.1
MFSPPIMTSRTFLFLQVVFSLYISSVYSFPFSLLKTNLIDPRDLSAVASELGTLGSDLQN
SSTLKTFLGDRGNVITQNDVLDSNGSCATMTVLFARGTGEVGNVGILTGPPFFTALAAYM
NETGSMSIQGVDYSASVSGFLAGGDPAGAKTMADLINNTLTSCPDTHLTVSGYSQGAQLV
HLAMSSLPTTTTSRVRSVVMFGDPKNGTALAGIDSSKVMTICDPKDDICKGGDAILPAHL
EYSANAGTAAKFALSGLADVGITSARKVSGVDGIS
>dc9a2d2e-9655-458c-8ead-6436e94558ed (mRNA) 1091 residues [BFAB_07:459333-463118 - strand] [peptide] name=Bfab07g01250.1
MLERTAGCLETGSLRRLLPGPKHLAKSRRALHSGFWTHGAIELELSPLWQLMLQGPDVTE
GSNSRLPNDGTVSESPGIFLDFLYPTSTLKFLRQYPGLGVDRQDGKRTRLGLRGSGYRLY
TSSAKKPSLALVPVDAETKESAEIKKRPIIHEAPDDAATIATVLGITTSSRYEEVWRKYR
RLEFGSWAEERIRIQVLEYMAASNRIVDAERATSLFERSDARREKPEIYEIVIRTYLRLQ
NFSRANELYHYSLEKFNTTAGGSDIMLHLMTNGLWSQAFTLWTEVQLHGSLTGPRYDMFK
SLHHIEDLPNKALLLAKYVNKSLHHPSEVETLPSEALTKFATAVITSALLSAKHFSYATF
WPLLRHIQDWETESVRLYTQATNMLLSLGQLKAAVVLYRQARESPMKNLLLPRSMLQSVL
QIFFKNHDLIGIQEVFADIFRFNQTLDRASHRRCMDEFARYGDADTVHALFEQFAEKYMR
LESESATTPNPLASADDMAPLLHVHARRGEPKIVLDVFKSIRKKYRLKPTITCCNILISA
YAQVGQVDDALETFESTVTKRKLQPDDYTFGTLMGMCASRGDLENTIELYRVSATYGVEK
SAAMVSTLVTAYLAGDRLEEAETICEEAMNLKFSDSRTRMWNSLLVAWALRYDLINVNRI
LQRMSKLNIEHDGDTYAALMQALAMVKQPERAWQILAEVMPEAGIPATSLHYAIVMGGYL
AAKRYKEVFVIQDRMLEQKRMKTASTKFLELRAAIHAARVTWGDPHGAMEIFEQVVQTMN
PRDISDKVRKGIQHEPLDIAFPTTFFGYIVFVLSKNMEITSAKDMHQRFLRLLPTDRRDT
QPGNITTALMSLKLQELDYDAVEDLWQQFVSDTRKRAQSLRLSKLLSRTNDSEKAEVAES
DVDHASGEGALEDTKANLQENKEPIKAAHRLALTKALHFYMMALVRQGKINVMIRTVNEI
TDMGFQLSNQNWNEYIQHLTKFRHFKLAFKICETVLMDHWKGWAKLRFLTSEKNRLPLEI
RRKGKLLTSLRPEYRTFLYLTKGFLNIQAMAAESRANRLLLNDLEHDCSRTLNAIKTMVR
TGDSLEREILG
>61d613f6-06b9-4951-a784-b05e604dac19 (mRNA) 618 residues [BFAB_07:463360-465971 + strand] [peptide] name=Bfab07g01260.1
MEITKFVLEGRDEAKLYGDSSAYRTRLSNRIHTLRKKLGITTKPRAKYSNKPVTAEDISQ
SHDYIHLLLLTSERAWAHAMSMKEIHTVDTKGITGSTRSHIVSRLHKATIYANDLFRLLS
DKSTTNANDVDVLEARAYAAALAGAMEFEKQSWEACVKRYAEARIIYTALSKVTKADIFK
DLLADPVDPSIRYGAYKMGLPRTLAISAIARKNFPSDQELTEQVEKLDPDCLKDEATISK
AESLESGETIKTIVWRSRTVDLEDAAIATALGSVKAASSKLSNTLSSSTPKDRGSAYDDI
LIASQEVVDATKHAIDELVSEGVGQSDKRMQSLLVTRTAVSYDMIGWRIGRNRVMVGEQD
GIIDYVQSFPAGKVKKSTKDEPIGRKLAKLREKVVLYDAILQSVESIKELPGVAADSSLQ
EELDAKYSYFQALKCLIIARSHAILSNPKNSLALLNRATEKCTAAHSKLSSSMDTTTTDT
PPNLTVTPSETENLLAYLQCELQRYRALVEISNLTSTIPKPGDENVQQIPLVERLHEYPS
DGVVDLKNLVNYPPKLEVVPVKPLFFDSAWNYIDYPGRTTEKAAEKAAVEVQAKEPEPEE
PQEQQQQQQKKGWFGFGR
>71f973ff-53a1-4d7c-874f-c2ce14180442 (mRNA) 920 residues [BFAB_07:465976-469102 - strand] [peptide] name=Bfab07g01270.1
MDLISYTEKRISMASAQSMNEHSSEADAEISKMIPQLPQTPPDSNENSSDELGSLSSHSS
STSLSLQRYTLPPPTNPPTEILKEDLKTPDNQVPRDPRLIRLTGIHPFNVEPPLSALYDE
GFLTSPELFYVRNHGAVPHVEDSSIPDWEFSVEGLVKKPFTLTLKDLLREYEQITVPITL
VCAGNRRKEQNQVRKSKGFSWGAAGVSTALWTGVPMYELIRKAMPMRGAKYVCMEGADKL
PNGYYGTSLKLNWVMDPNRGIMVAHKMNGEMLRPDHGKPLRAVVPGQIGGRSVKWLKKII
VTAAPSDNWYHIYDNRVLPTMISPEQSANEPKWWTDERYAIYDLSTNSATAYPEHEERLS
LVSGQQTYRAKGYAYGGGGRRVTRVEVTLDKGKSWALADIRYHEDDYRDRAYENETLFGG
KLDMEWRETCFTWCFWEVDLDVQDLAMSGDIMVRAMDESMNVQPRDMYWSVLGMMNNPWY
RVTITKEGDYLHFEHPTQPALMPGGWMERVKAAGGNLANGFWGEKMGTGDESVALVEVKQ
EIKMTKDDVKREISIEELRQHDNEKEPWFVLNGEVYDGAPFLEGHPGGATSITGAAGQDS
TDEFMAIHSETAKAMMPAYHIGTLSPSALTSLLNPEPLSSSSQSLRPIFLQPKSWQKAVL
TAKKVISSDTRIFSFTLDHAEQVIGLPVGQHLMMRLRDPVTREAIIRSYTPLSLGTDKGV
LDILIKIYLKNEKGPGGKMTMALESIPVGHSIDFKGPIGKFEYVAKGECVIGGKKRRVKR
FVMICGGSGVTPIFSVLRAVLNEEEVGDAPKCIVLDGNRREEDILCREELDDLVKGNEQR
CRLVHALSQPTEEWKGLRGRLGKEVLEKEVGRFEMDMDGEGNGYRDGEQLVLICGPEALE
KSVHGILSDLGWKDQDILFF
>4289c04f-fac5-4870-a81c-5fde25b7163a (mRNA) 1159 residues [BFAB_07:471425-476637 + strand] [peptide] name=Bfab07g01280.1
MDRRRKRELRDLNTRAWNGEKDIYAVNKSLDSSLKKNTAFIKRLRTAISAATLSTFLQEI
RTLSLHKYLSEIISACYEGLCRLKSPGEVEAGVEIVSALHQRFGPAEFTEFLGWLVGKGL
ATPEKSLLKSLAAEAREKEEKERIVRQRVLLRVVTELWLVGVLRTLDDVARPDDASHGKE
SLSGSSNKAPDTKAKPNGVGKGGGAEPFPLEVLKDLLGHDRDHANLPLLVIFVKAFGWDI
LGVREAGYEGRKTVEEDGTTKTTLDATEGEGENEDGDENDSVEETSPSVDSTEDAPLASL
ELQERFRNILNRYFEDVKAHIIRDQKAIAKQARKDSEAYVKSGQLFEDRQANYEKALKAQ
ERLVSNAQVLAESIGAEMPDLKDSDDSSALGNGGIGLVKAGDYLRGEGEGAGIWEDEDER
RFYENLVDLKGKVPGMLLEDGKKKKTDTDEQVGKKVDTSEIIPAETTAPTAKTTDDDQST
AIANKTIGAQVDALLARLPDLTNKDLIDEAAIDFCFLNSKASRNRLIKAVQEVPKGRSDL
LPSYSRLVATLGKYMPDIIKGLVDHLDQEFRSLQRRKEKEFLGQARLGNIRYLAELTKFG
VVPEHVIFHCLKVSLDDFSRMNIEIICNLLENCGRYLLRNPDMSPRMTSFLETLKRKKSV
QHIGQQERMLIENAVYYVDPPLRPTIQQKERTPTDLFIRKLVYSDMTTRNYARIIRSIRR
LHWEESEVVTILEKVLSKPGKVKYGNIYLLAIVTSALFRYHQGFVITVIDNVLEYIIVGL
EQNDFKFNQRRIAEAKYLGELYNFRMVDHPVIFDTMYRILTFGHGGPPVPGRTNPFDMPD
DFFRIRLVAILLESCGVFFSRGAAGKKLDYFLSFFQYYIYTKDPLPMDIEFIVSDVYAAT
RPQWKLASNIEEASRAFQLAMAQDQKTAGIEKVVEPEEPDSEASSDEGDAGIPEGDIDDA
SLDSEEETEIDANADNLTSPTGNESEEENFKVTRQEEEIDPEDEADFEREYAKMMAESLD
SRKFERKATFDVPLPMRRKDREVATSSELPSETTSGNGPSSGTMAFSLLTKRGNRQQTRT
VALPSDSNFAIAMKSQQAAEREEQQRIKNLVLNYDLNDGEEQDGFDKNATTTFSRSDKSG
SNRSGQRSRKLQLSDVDWT
>75ec9326-271b-49a2-96ef-dbb5aa2dc029 (mRNA) 746 residues [BFAB_07:476890-479830 - strand] [peptide] name=Bfab07g01290.1
MSVVGVDFGTLNTVIAVARNRGVDVITNEVSNRATPSLVGFGPKARYLGEPAKTQEISNL
KNTVGSLKRLAGRSLKDPDVALEQDYVSAPLVDLNGQVGAEVTYLGKKERYTATQLVAMY
LSKIKQTASVELKLPVSDMVMSVPAWFTDVQRRSLMDAAEIAGVKLLRLMNDTTAAALGW
GITKLDLPTPEEKPRRVAFIDIGHSNYTASIVEFRKGELTVKSTAYDRHFGGRDFDKALV
EHFAAEFKEKYKIDIKSNPKAMVRVAAGAEKLKKILSANAMAPLNIESLMNDVDVSAMLK
REELEALVEPLLSRAHVPLEQALADAGLKAEDIDIVELVGGCTRVPALKERIQQFFGKNL
SFTLNQDEAIARGCAFSCAILSPVFRVRDFAIHDIVNYPIEFTWEKSPDIPDEDTSLTVF
NRGGIMPSTKILTFYRKEPFNLEAKYAKPELLPGTMNPWIGRFTVKNVKADSKDDFMICK
LKARLNLHGILNVEQGYYVEDMEVEEPIPEKDGEKKDDVSNQISNNIQPPFEDEPIAKRP
RLQGHNKLTHTTKAMDTDDKPKTRKVKKQVRKGDLPIVSGTASLDTAAIATASEQENTMN
MEDKLVADTEEKKNELETYIYEMRSKIDDQYAEFASDEEKEKLKAKLEASEDWLYDEGED
ATKAVYVAKMDDIRMVAGPIAQRYFDKVEAEREEVRKQEEAELQRKRDMAEAAKQAAMAM
EAAESGANGDVVMTDAENVEPEVEEK
>49577df6-d0f5-44f6-bfef-64ca39764da0 (mRNA) 775 residues [BFAB_07:480758-484695 - strand] [peptide] name=Bfab07g01300.1
MVQYDTSPWPVRDIVYTAIMGSVMLAAFLEWFLWLAAFMYCLFKVFQKAEHWSVRVLSII
VAIIFFLLRAIYLPIMVVTLPLPEGVTQYFPKEMVSFLQWFGFWSFAALLTIPWLFCVYQ
IVTNSLGRKKRIKQVLDEHSAPKVVIVMPCYKEEPDILVTAIDSIVDCDYPPSCIHVFLS
FDGDQEDELYLKTIEALGVPLSLDSYPKSIDVTYRTARITVSRFPHGGKRHCQKATFKLI
DKVYTEYLKRNDNLFILFIDSDCILDRVCLQNFMYDMELSPGNTRDMLAMTGVITSTTKK
HSLITLLQDMEYIHGQLFERTVESGCGSVTCLPGALTMLRFSAFRRMAKYYFADKAEQCD
DLFDYGKCHLGEDRWLTHLFMIGAKKRFQIQMCTSAFCKTEAVQTYQSLIKQRRRWFLGF
ITNEVCMLTDIRIWKRYPILAVVRFMQNTIRTTALLFFIMVLSIVTTTKKVQDLPVGFIG
ISLGLNWLMMIYFGAKLRRFKIWLYPLMFIINPFFNWYYMVYGIFTCGQRTWGGPRADAG
AADSTTSPQQVIEAAEEAGDELNVIPETFKPAAEARNNQIVRRPTLPLLPPTRLEGRFAA
AERLPGGWYEHVNDSLTSVAVGRVAPSGRNPTGSRESIDSYVSGFTGTNSVYMPRRVESI
MGEEDRKKYEIAQANQKAPAGAYYNQGYVYEIPDGPEAKGSFQDSVESLASMDGTTSNSL
AVPQASSYRNGRSPLGRLSLIRSNSRDDPIEMDDQRSDRDHHSDSSNSPEPKPKR
>7562af49-e1a5-49e7-8910-4e32cb917855 (mRNA) 810 residues [BFAB_07:489929-493275 - strand] [peptide] name=Bfab07g01310.1
MPMFQDDLGDGREILPVQTPKLTPVSMTPPERRTIVRKDSEESIRTELCEGPVPDTPEGS
KSIPALGLDTSFKNSYSGTSEREDLIERLKRGENSSWFPNLNLESLLHGQSPETPIRKTS
NHSNSSSLLPSPDISNTIRPSSVDKPSLQAGLEIERPRSALHSGNFTEGPRRTISGSPGQ
DMKRFGTVNLPWLATSPPRNFTPFQLDPRFPSVDRVEAELRTRTRAPSLSSSYSSSFVLK
APTSPLVQSESNDDLDYTSNLNPIDISPGTPTTNSRRHTLQASHSIYSNNSIPGSTAFNK
PFPSLRRDNTYPYQAHQPRRSLASNTMPHSASSPQTPTFLRSRRPSFSDLSPLHASMVGS
YEESILRGRMSTTPSKPLDFVAQIGVLGFGKCKSSLKCPPHVTLSFPAVFYAYESTSHGR
RGKSDDGPSPYVGCIDLENGLPSPEKAKDNQKRRRHATLDRIHMDDLDTNPSSLGQVSEQ
EIRRAGKQKRRSTSPREPPGGSYRIPEKGQLQIIIKNPNKTAVKLFLVPYDLTGMEPGTK
TFIRQRSYSAGPILDSALSSSPHRSAPIIDPLAERPTLRYLVHIHICSPARGRYYLYKSI
RVVFANRVPDGKEKLHNEITFPEPRFTTYKAIRDSSLGGAGAALAAEKAFRRRSSGFPLS
GNKNFDFGGDDGASSRGVVNPIPFQFSAKRGMIGGDNDIGPLDLGARESLNLEHNVRPGT
AFEEVKMGNMGTGIGTGLYEKLKKGDLGYGNDGFSPTRTNTPDREGRQFPAEGLLATRLR
ELGVGLSMGMADGNDKERADLESEKLGGNS
>f918aceb-84bf-4fa9-a52c-2e403fa2228e (mRNA) 223 residues [BFAB_07:493453-494722 + strand] [peptide] name=Bfab07g01320.1
MAPTKRPWEEDHPSRSTTKKPRHGFKVGPDNLPDGTWRRKVIAIKKDLIHKAKVKKSYAK
LKAREPLKDERNIYADDEDQADEAAKNEEREDAVEGEESVELHPQRKAMLDEPEADTAAK
TVPRYSNNSEDAKDRKRERGERRAAKPAYFAKELAFAEKQKAEQQARREEFERKEREKKA
KIEERERFRRQMAKARSGGKNGQRKLGRESQVLLEKVKRVVGN
>d510374d-0aa9-4608-a548-7dbb0cfa07de (mRNA) 767 residues [BFAB_07:494639-497534 - strand] [peptide] name=Bfab07g01330.1
MEQHRGTNSFGKRDNDESPRREEYRFRPQREMAQNHEVSRRDANSYAPRYNHNQMRRKMD
SYRPGRPHWPRVPHRNHVARNSSYPGPSTHDTTTQESRSSPFETARTSLSRAAGAANTSE
ESESAPLVSHHAEAVPSTKDKETPSSRDEDEYELICEHAGGPLRRFTKKMCDVITETITE
HCHDDTMSAIDILKQACINLSVKTGTTLEVHDCWLYWRKRGMRTNIAQWWPDSLDDVDKE
VADYRRLRSAKSNRARAAYAARLATVPVASSKTAGTTEAFASSDPVEEPKDWPREEKLLL
FAKLKAKRPIQHRLHTNMLWIMVGRAMRREGYTRGRDEYREWFEKYGRAYFDYDETRYFS
QPGNPHVGTGRMQNGIMTPEDSPVGDARRRRRNSNSDGVRARLRGTMAPMSPSVPKTPKP
NKPRMSTTVLHDMKSWLGGYRNVDKTAKVAEEFPLPLIKPSEGERFGPFTTEKQENYEPP
SSAAGCLPGSLLFVTEDEAQSERDLFPSALDATNSHSSPAPALTDAPSTISDETGTPKER
VESIGEIKAGETMAPDEKIEPGETIPEDENDAPSLQPNETNSTQDGIQCTSDEWGFATPP
FMRPSEVDMAWIDEYSDFESSHISATTNASDPSTSAGHPSFGNSLTSNETIEEVPLTQPS
TSDDESKNNTSSESQAQLLREQQERTDVEISNLRASYLRVKEAEEDEEKKLDDTAQELDI
MVLRRAEQLKSQTAYLAEMQRIEAELEEKKKAKQALSIALEELEFFG
>786cbbda-c0e8-41e3-9b1d-4eaf4d095eda (mRNA) 508 residues [BFAB_07:498658-501004 - strand] [peptide] name=Bfab07g01340.1
MVKGKRWQSEEVAKLREICSRQAYISIRGSNNPFWEMVAGEMETYGWNRQAHAIYFKWMR
LNQPPRPKSSKKNSFGYGDSSDTEGEERGEGEIEDYEGETDTKSDVLFQIRSGDDASKPW
AKGSNWSDEESEIAYQCIKTQRDKEKELKLEPITADQIWHMVAEALEQHQIYRKIPNIYT
YWKNKGRQKYNFDERTADAIEKSSHGIPRVRGGKAAQNSPGHTASKVHTWLSMPESSTED
HLQNNSKAEMAMENLQVLISPWQHDLLMIEYKKYNRLDNPVMNQLTEDTGLSREQIKLWY
KYQRAMDAKEANLQKEVELQTGELSTPILDEPELQSTGLKRYRVSDIGYYHQAEEEPAKR
VRHSLGPEILMKDHGGILVDSKSQDKPEIFGRHSIVPEQNELSTNDVAISTVEVQQPSLE
SATQRKIPDITSNVTSVMRENRELEQQKVHAAEEKYRELELAIIAHKNRADLELKAAIAK
EQELTVQQEIREKATKRIAMIESFIDDY
>64677fea-30df-436b-bc6e-a5ff37ce0702 (mRNA) 290 residues [BFAB_07:501836-502956 - strand] [peptide] name=Bfab07g01350.1
MTKKIGLQAFLRREVMKTKLQVPTENESPRFTKEASMLSAQPKIYEEPEGNTFRNVSDDK
KEDYKAPLERLRHSSTPFAVRYEIKPKSELRIRIQELRKQLLAVIDTSFKNLHERAISAK
ERDRLLRSIECLEAQEKREKDNALRATGNLPEPISESERRQRQKELELVKNALAGKEKVK
SPIKRPFRPLDDDPDGETRKALGLPLRRRKLKKTGKWANELCYAVPELRYKDYGVEVLKE
ILMCGADEEQEVWLGKWFSRLDAKITTSSEVRGSAKEKSTRRKEKGPALW
>92944867-b7cd-4571-b030-80f7d36f9a1d (mRNA) 390 residues [BFAB_07:506301-508021 + strand] [peptide] name=Bfab07g01370.1
MASPDEISVKEVPAPTKDGEVEKAGEQRQVEVEKLSTLRSVSLDVVGVESVNKEAKKRRT
YKKWSEKEEVIVQGIVDNHKTNPETSNMGLVELDRYSVTKLADAGFFRTQLGVSGFRGRK
SSKPDYNPVVDLVANMPESIRSMEANYKPFASVAREPVRRPSTVVSQSATSLQEWNTLSK
LKNSPYALNGKRNYGDFNGDLARERANAATTATWKPQAQASSMGTNGQGFLMTPGSKSCE
VSKSQIEMGLNMLPPSKRMCVTNGSRGNPIEARNDPLLGQPQSESDRIEQARVSIVSLGK
ILLGAMTMQAAHENIAMTHENIAMAHEARRKEAEKLAVEFKKRAQAQRDEIVRIQTLNPE
LKNYDVCSSPEIEEDMRIFELELKNNQVFQ
>66b5a92e-6ae0-4766-bbd7-613c5d77d825 (mRNA) 1230 residues [BFAB_07:511578-517550 + strand] [peptide] name=Bfab07g01380.1
MESPDNSTYLESPMEGDDVAYPCKGCGDILEEGKAFELAGNRWHLNCFRCNTCGTLLDSD
ANLLLLGDGSLICNNCTYSCSACNNKIEDLAILTGDQAFCATCFRCRNCKRKIENLRYAR
TSQGIFCMSCHESLMARRRKKSRAAANAKKKDDQSPMLVDKSLPALPPNAVPQSAFSPER
EIPDPHNADNPTELSPRPRPTYSRADSSSRSSSRKPRDDTSSHRASTDTTGRDGLTLPTT
TYRNNRYSGISQMSEIGNGDGESFFIPLALDPSPAPTLTPRSTSTSWDTKKTKENQAPDR
DYFGVKDNVRSQTEPQPQRRSRDLRDTSSTSTPHIAFQDKNQPSDEQLAQIKESIRRAAN
GAGTPAKESSASTSDDTLLQHATSPTADAPDGKTQGSSEKFRLGDVPKGKRTGTMRSDSQ
SDYTGSESNSSKSALSNIPTRKDSNMPKMDSPRTLLAADQITSRASLESRPKDMESSTVS
RVNSGSSKVSIPRKEIASGPVKSHVSTMSLSSGTETSPSTESSSEGTAHTPTVNGKSISG
PLLQSPIDDMVPPNRSSIRPLPKQQLSDTYMTPRAPPAPPSAGSNGTASSPNLPRWSAGG
DLTMDEDMARIFGNDEGSQSIIRRVSNAVRHVRNTSSEASTSARGHGRSVSETTARTPNS
PRWPKTPIVEDTSGPRDISSPISMSSPNPGDDPALLRRQLRNSEQRVAELERQFVNEKDL
KTLNKKLIEKRKTVSVLDSQTELMIRQLEVLAGYVERAKGSKQPLDIAELEDSAIKEFVQ
KLDRLKQSMSSAIEQLFEERDELLEEKNQAIADRDRALVEFEQLSSKNAQLADMNNDLTH
QIQERFKSANTNMESPRPLTNGLGIYTHHNKDKSNVSVHLDNASLRPSESSSATYNNSIN
SYPHPMEQDPSMEPATLLSAPHVVNIRKGQAKKFNWKKGGQTVAKGVTKGFKGAFSSGQE
RPLNQWPGQTGDNIGMPYNMTMEHVQSPAPNASGTSLPRSTSNDPSRQGFGLFKKSQTMQ
KSMSSGNILAAESPSILFGSDLVERADYERRQIPSVVTRCIEEVELRGMDIEGIYRKTGG
TGQVNIIKEGFDKSEDYDISDPDLDITAVTSVLKQYFRKLPVPLLTFDVYDRVLESISIE
DNAERCTHLRNTVNMLPPKHRDCLEFLIFHLVRVAKRESENLMTPKNLAVVFAPTIMRDH
SIDREMTDMHAKNQAVQFVIENSYDIFAGA
>8cb105c5-e219-4016-acab-1bc45e0fff81 (mRNA) 1089 residues [BFAB_07:518297-522192 - strand] [peptide] name=Bfab07g01390.1
MGEKITEDQVANLLAILRTDALIDSKVNQINNIKSSIKQHNVPEPCILSLFEALRLAMSS
QHAALVNAGFSTLNHLLTRLSRQEPKYIVKEAARTLPMINDKMGDQREKYRQLAALCLTT
FWKNAPMDVERIVKNAGLVGKNSRMKENSMNWIVQMHQEHGMPFKSFVTTLMELLEDADG
MVRDTARNTVITLFQNAPNGAKSDLKKQLKNFNVRPAIVSAITSQLISGGAPVVVEPERT
EAPMRNPLASSASAMNVSRPATPEVKIEQVDPAYVNTQRELEETFQEMHQWFQDKESEAN
WFKREQSCTKLRRLNAGNAPSDYHDAFLAGIKSLLDGILKAVNSLRTSLSKEGCSVVQEI
ARTAGPGLDPMVEILLQNLIKLCGGTKKISSQNGNLTVDIIISGVTYNHRIMQHIWLACQ
DKNVQPRTYATGWLKTLLKKEAQHKSHVEHSGGLELIEKCIKKGLADANPGVRENMRSTY
WTFAQIWPARAELIIEDLEPTQRRLLENSPDNPNAPKKAAAVSSTRPGLGFSKSTTGPPR
PSLRETMLAQKKAQMATKTIPTRPGSAMSTFSPTRTVPTKHSSSEVAPTRPHLDATGSRG
GLSVAPMRPSKSKRPELAARPATAGPYSVRRTNQASSEANASPSSSTSARPPRSKTPVAT
SSPQAKRAPIPRPNTSHSSHPTQSHHPTQSTYTSPAAKSASGRVTTASPRLAASPHISSP
VRTRTKSVPGLPGPGSSPSRADEDFTMVVPTITGLERIQSDKLPQVFEPSEVRDIKAPVN
QPMKVYEDPFSSTDDTTTPGPAVPQSVLEEVPVNEDAINLSRNSISEFDGEGAMNPPMSP
DKLKHSTKLLDSGISKIRAKSLDVHGFRKLQAMIRDNKAVWGDGRFPALLLGLFEYLEEP
LTNLSPAKVQDVKAQILATVKLMYKNYREYFRPHIAKGFHSILVTRSCYDARAHIVSGLE
LLADELVTLANPKETIITILNSLSNEEMTLEGCRKFSMGLHILKQTLDIKSDVELEDAEI
DSILELAAKCLESKESGVRLDAVVLCVSTHARIGEARFWSGIGGRVSGDPKSLITYYIVK
RQRELEVEN
>b3a56976-855f-48f8-889e-e73cb7649aeb (mRNA) 322 residues [BFAB_07:522390-525032 + strand] [peptide] name=Bfab07g01400.1
MPTSPATSPVPPPVFMPQFSSTSPAPTPVPMPPAKEKSASKPSKDDGSIPAIKFPLPKLR
LELRDLNHAGSHTFLTAVIADDALQTAVQSVLTLLYESPTCPTTTPTPTRSVTLILRSME
GVAYTTGSDLDNDHKEIHLSLDYIQHESIKPDRKKHEIMGVLTHEMVHCCQYNGFNTCPG
GLVEGIADWVRLNANLSPPHWKREASGKWDAGYQHTGYFLEYLEQRFGKGTVRRVNEKLR
VERYEEKRFWTELCGRPVEQLWKDYSKYLQEEERKAEEEECVVVEKEDAITPKQPKCEGG
KVTLATTTEETKDNPTNTEKLE
>85f18bb9-f526-4512-bec2-622cfad1ac4a (mRNA) 399 residues [BFAB_07:526084-528048 + strand] [peptide] name=Bfab07g01410.1
MPNHPVLVSGAVIIAAVAVGAAIAVYESPQARQLAEDVRRRIAVALHSLGDGINPNSRQP
RFNRPEDAEGFMQSASEVGVDADEDSRRKQREELMYWNAVRMERMEKEQKMDEKRPAGNP
TRKPSFEDFLQEDPSAEKGTFVYNTGTDLNGQAEEGLTHRRGVRGLNRSTIYANPFADEH
GIDSEEQQAMDRSLMSPEDGEQYESDSEGLYSCHEGRTRPRSRQSTSTLSPAEPIAHEDA
ETLVDLSEPFNPDPPVSVPTLENLQTEPTYTARAQDNENPFASIHAWADHTDNATGFYSP
LPVTPHERPSTPTATQSAQVTPPSPTISDPDYSSLESLDGDGMITPTDSASLAGSGEEVW
HPRSGATSDADVMSVDDGIVTPDSWSEIGSLASEDEVHH
>a3fe132a-8a87-47d1-8867-f08327840081 (mRNA) 652 residues [BFAB_07:528363-530946 - strand] [peptide] name=Bfab07g01420.1
MSESYRPDNDAFPESPYDIAFLSQRDLGLNIPINYATAPGVSLTAACFSSLKYEDDDATT
CISNLLANGFRRLEVDLYWDEARQLWSFCPAAVPISSSDVASTPTPTSTLSSTTASLTLA
QQTSDLIPRQNAATSPIIPSPSTLDVTFNSRPTSHSSSTVNVIASSLESTLPVASAIPKL
SNKSLYDIGSYTCTNTINLDMLTSLLLDCIQETQNNIDAYMLILTLNIHEAKSGFGIDDP
APQPTDLPDPSESLKFLFASNFSAYIYTPNDLRIDRANLNTSWYQVAARYRPDLDYYTTA
TEEFGIISTKDGWPSESYIEFSQGKRMLLQFGSVDPQMENYNFSGDAGTIFPPGYLSNRR
DDDTLASADGVIESGCFLVNATEDVSQVNSSWATAVNIAGFDYPTDSNSSLTSLLNLTSS
LTNCGISPNLNTTLLNTSANTNNFPYQHYTYSTIWSWAPHEPRSSNSSNDNDDSLFRCAT
LHPATTHWHVTDCSTKLYAACRAPSQPYNWTLTTYPISYSYASQACPTPYIFSAPRTALE
NAYLSQTATNLSSARDFDSDDPKIWLDFNSLDTKNCWTTGGPNITCPYSNEDSDDYAREK
VVVVPLVATTIVLIIFFLVLCVNCGKGFLGRKGEGKRRRRVREGAVYEGVPA
>7f0fadbe-c7ff-443b-bb8f-a8b8ccbc2b66 (mRNA) 511 residues [BFAB_07:531237-533311 + strand] [peptide] name=Bfab07g01430.1
MDSPDADPQQGPPPGLGQIQFRLPDGSQPSPEQIQIMQQQIAQQAKQQGLSIPDFIAKMN
AQNQARLQAQGQQPSPEQIQAMQKQLAQDAEKAGMPVAEFVAKIRAQQAQQQALQQGQQP
SPEQIQAMQKQLAQDAEKAGMPVAEFVAKIKAQQAQQQALQQGQQPSPEQIQAMKEKLAQ
DAAKAGMSVPDFVEKIKADAMAQQQQQREAAMQQQQQQQTQPINPGPPNPAAVALANFLM
GQDLKARTCILNGQRKDMFKVKRALRAIQSPAYEKARKKNPLLPEITDRASLENCFKLLP
LSLLALRVSKVDPHEGHDHAPGAHNTKRVKGLWTVKIEPQQECKEELHFVWLYEGTQIKQ
KLYAAGALAIVFAIVMFPLWPMKMRLGVWYLSMGMLGLLGLFFAMAIFRLILFGITMFAV
PPGLWLYPNLFEDVGFFDSFRPVWGWQEEKKKSKKKSKSNASASASAIGAAMTGQPAPAS
ATTTGSTAQISTGETTQRNLAPRVEEVFDEE
>3e9044ce-8f1b-478d-9dda-c00c4df3921f (mRNA) 370 residues [BFAB_07:533399-534837 - strand] [peptide] name=Bfab07g01440.1
MKRTTRKALVHLTLFCSALFLIIFLNRSSSNTSFPWTRIRYTHDAQSRIPVPPAHGICPG
LSTTTKPVLVVSRVEADGDSSWLDSLSHKYHICLYNIDSSALLKSSQKVLQVPANRAHEA
MPYLTFLIDNYANIPATGAVFVHGNRYQWHNDHPQYDNLDLLSRLDLESALAEDGYHNLK
CDWSLSTCSDKAVAQGSLETSMQASLQPWDKRAVSDAAMPKALRVLFGEGKQLSRTDVVK
SQCCAQFVVSRKSIWKHDREEYVALRQWLLNPDGAPKDDKVAGRILSYLWHVLFLEQDGG
EVEGMVDLDRLNRQACPSAQKCYCRLYGKCDLDCRTTGTCRGQYVLPKNLRLPEDYGRQF
EHLDDHSDSL
>9d06e8a6-ae77-4828-81c9-1333756c6eb4 (mRNA) 768 residues [BFAB_07:535932-538935 - strand] [peptide] name=Bfab07g01450.1
MLFPEEDAGELKKWIIKRLENTSDADADVLADYVLALLRHDGDINTVRQLCMAEIPDFLK
EDTSIFVRDVFDALQYKTYLSGGPPRRNSQQFAPPTGPSAPAFNNPNMGPSMGHQNGSRK
RAFDGRGDGDSQMYMGGGDQNSRAFKQPRRGGAAGRGAFDNFNNGRGGFQGRPQHMQMPN
AQFMSNMPNMPGSPTGLPLDPNNPMAAILAMQQAMGAMGMPLPQGMPGFPPNGANQNRGH
PGPTGQRKQRCRDYDQKGFCARGNTCMFEHGQDSIYVPGGAGKPTDEYDPSNASLMTGSQ
NQNDNNQRPPPYNGFENNRGGMGRGRGQSMGRGGSQMHSNRGARRSEFSSDRANFNKNNT
TIVVEQIPEDKFSEETVREFFSQFGTIKEVEMKPYKRLALITFDDWNGANSAYSSPKVIF
DNRFVKVYWFTNNEALPKPPANGLFNGANNNGASGPVPARETDEPQIDIEEFAKKQQEVQ
KAHEEKMKKKQEMEATRKELERRQEELLKNQAEEKRKLMERLAAKSGKSVSPGLNTEGGS
PAPAPSSQTEALKKQLAALEAEAQSLGLPSLDSPLSDDTWGGRGRGRGGYRGRGTFAPRG
FRGGFRGRGGAAFGGGAPARYNLDNRTKKIAVSGADFTNPQIDESLREHLLGIGEYTELT
NTPSGCQITFKDRHIAEKFMYGLQNGEIPSVGKVELSWIQTPLPPVTLPNTQSSTGGGNT
ESDSKMEGAMEGDAMAQDSNAMGMSGHGGEREMQENIDYDVAGDDDWQ
>f923ad31-218f-45d7-8772-94dff23c1e84 (mRNA) 915 residues [BFAB_07:539239-542833 - strand] [peptide] name=Bfab07g01460.1
MYLYTALFGLMTGVVAQSTVDYSQYVLTSNGEASGGNTFPGVSLPFGMVKLGPDMFTGSD
SYSGAALRGNFTGFSMMHESGTGGSPKYGVVSQMPILGNITNPLVNLNDTRASADITSVG
YYKASLGSNITVELGATSRAGFYQYTFPEGRGTPKVVVDVSHVLPSYRKQGLSQNYLGGN
ITVLEDGHYEGSGDYNNGWNMAPDWRIYFCGYFESPATTKTFTGTSLNGSVVASYGTERS
ASSKTRLGAIFSFNTTTVISRVGISFISSAQACENVNSQIPSGTTLSALTNDAKNVWNTE
VLSKVTTTETNKTNLQLLYSSLYFMHLLPSNRTGENPLWISSEPYYDDTFTTWDLFRCTF
SLLHILQPVAYEEYIRSLIDIFRFEGYMPDARSSNFNGAIQGGTNSDNVLADAYVKGVRG
AVNWTTGYQAMVKDAEVTPANNNDPRDNSSSTKEGRGALPDWLQHGYITPKYGRSVSRAV
EYSFNDFSLYQVATGLGIKDDAMKYLKRSRYWVNHWNPNATSLGFNGFLVPRSALGFIKQ
DPLSCGGCYWGDAYYEALPWEYSFNMHHDMNTLIALSGGPSTFVNRLGTMFKPGINTSGR
SSAFNNTIFNPGNEPSFTTPYLYNYVGRQDLSVMQSRYIAKSYYSPTPGGLPGNSDAGAM
ESWLIWNMLGLYPMVGQTTFLIGSPWFANTTIQLGGGKTLAMTTVNGSESSFYVQSLKVN
GKPWNQSWFTWNDVFANGGTMDFVLGSQPSNWTTGPAPPSPASMVSDTADPNSILTPVPT
APDPKSHNGFERERKKAMMRMIAFVILAVTVVTISCAGIWHWRKRNATAKVDIVDQEKGP
KQADVSARENESSSKGYKQKSMRWIRWIPNGAPKKDLNRSITTKNDVGSISEDTMVDMKD
SDNQSPGKAPMIKVK
>1fc22b1a-4217-468d-bf3d-33bd7ffc3ac9 (mRNA) 490 residues [BFAB_07:544696-546989 + strand] [peptide] name=Bfab07g01470.1
MQSLSRFLTDAQMAWLTSSINCCAAGDEVESCEPEKSMRIINGQPQLISPPLSQSPERPP
TASAFERPDTRGKERARTRSRTSSRGSSFTLKRNVSSRASNRMVISAPYNFQHHTETSYV
REPERVVLRKEPRLRPLELSIYLPGNRLSPLPEFGPHFNEDKTNRPLVHMRSESALEFRV
PRKPVLSTVMERRSMNTEELLNALSNDLPHERPTRLRANTEPLAYERVKSALLENMELDK
KLKELDDAIERRSIYLASRPVSHASRAESRQERRESIYSEFTEPMPAITELPLHHIDHRP
QTAPSRPRRMKSLDSSLHAPKLLKERPLPPPLPLVLQTPQITNQRKSLSRVSSWLFPSGS
EQQHSRHMSLDSVTNTPKPVTSRDGFYQCIEVKEVHNPHSVSSVSSIRSEVDGNEDYEAT
SWSDSPSLGYGPRYARGLGYEVRIGADSKGLQVAPPSRDGARTFGGSEKGEEARWSMAYG
YGKDSVGVAI
>af6751c2-4cf0-4113-9470-67c6ff6a7def (mRNA) 1176 residues [BFAB_07:549664-554246 - strand] [peptide] name=Bfab07g01480.1
MASMNNNFSGNFPTLANGESLHSHQGKLSGSSDLRPSYPTDFDKPVTYNFSVAQGQNPPR
SRPNQNENNPGIPLSNGHAANAQNWSPAQLLNPRSINQNSRPSPSSSPHPQPKFTPAAPA
PQPLFQFDAPGGSYTPSPPANPNYNVNSYSNGQNGFAPYANPSGQMPGMGSFVDRMHNIT
DRDMVPQKRRRVEDLTGEGSRAQFNGSSSGGAYGQYVKNRRVEGSKDGCTKQVLDLSLVD
DDDVVVVGNEQDREVCYGRIEGSQLNAHRVPTPKPGAQSLIPENWPQIKIVLRRKEGDKT
NNIHALDCTREIIGCVDVNTAIGLAPILDSPKMGVRTAARILTRRKAPDDQPVGSPCSVR
YNLDLNLYGPKKYALQIGRHLSHKQLWLRTPLSVEAGIPLHNPHAIEKPSRALQPTSSTY
SSYASRSQAPVRTTEEIRNDVLGVFDSLPRSENLPEMEPSSLITTELLKHQKQGLYFMMN
REKERNYEMNDKCDLWKLRHGNNGQKIYYNVITGDEERKSPPQVLGGILADMMGLGKTLS
ILSLVATTLDDSKEWAKQRPSQSDQREQPVLKSGKAASQPKFEPATLALNCKTTLLVAPL
SVISNWEDQIRAHIKSDALKYYIYHGANRIKDVTKLSEYDMVITTYGSVASECNNRNKKK
DGKYPLEEMNWFRIVLDEAHMIREQSTLQFKAICRLSAQRRWACTGTPVQNRLEDLGALM
NFLRVKPFNGSGFAQHILSPFKICDPEIIPKLRLLVDSITLRRLKDKIDLPKRHDQIARL
DFSDEERMVYDIFEKNATDRLKVITSQGESALGGKTFHHILQSILRLRQVCAHGKDLLSA
EDLKIMNGLSKDSAIDLDSEEYEDHDGMTPKQAYEMYKLMRDTGTDSCLTCNRKIGPQDV
ADSDGESKEEVIGYMTPCFHIICGLCIGAYKSQLEELAVGGSLVGCPTCHQQISPSMFFS
LKQEEVDKEEESRLKTKESAKAGKDLSNYGGPHTKTIALIHDLLASRKESQARPNEPPIK
SVVFSGWTTHLDLIQLALQENNIPYTRLDGKMTRIARSTAMENFREDPSIVVILVSIAAG
GLGLNLTTANKVYVMEPQFNPAAEAQAIDRVHRLGQKREVQTVRFIMNKSFEEKMLQIQD
KKQKLASLSMDSQKGRLDKKEASIRRLEELKDLFRK
>d977eee1-c2c2-4145-9e79-847726b03ad2 (mRNA) 1131 residues [BFAB_07:549656-554246 - strand] [peptide] name=Bfab07g01480.2
MASMNNNFSGQNPPRSRPNQNENNPGIPLSNGHAANAQNWSPAQLLNPRSINQNSRPSPS
SSPHPQPKFTPAAPAPQPLFQFDAPGGSYTPSPPANPNYNVNSYSNGQNGFAPYANPSGQ
MPGMGSFVDRMHNITDRDMVPQKRRRVEDLTGEGSRAQFNGSSSGGAYGQYVKNRRVEGS
KDGCTKQVLDLSLVDDDDVVVVGNEQDREVCYGRIEGSQLNAHRVPTPKPGAQSLIPENW
PQIKIVLRRKEGDKTNNIHALDCTREIIGCVDVNTAIGLAPILDSPKMGVRTAARILTRR
KAPDDQPVGSPCSVRYNLDLNLYGPKKYALQIGRHLSHKQLWLRTPLSVEAGIPLHNPHA
IEKPSRALQPTSSTYSSYASRSQAPVRTTEEIRNDVLGVFDSLPRSENLPEMEPSSLITT
ELLKHQKQGLYFMMNREKERNYEMNDKCDLWKLRHGNNGQKIYYNVITGDEERKSPPQVL
GGILADMMGLGKTLSILSLVATTLDDSKEWAKQRPSQSDQREQPVLKSGKAASQPKFEPA
TLALNCKTTLLVAPLSVISNWEDQIRAHIKSDALKYYIYHGANRIKDVTKLSEYDMVITT
YGSVASECNNRNKKKDGKYPLEEMNWFRIVLDEAHMIREQSTLQFKAICRLSAQRRWACT
GTPVQNRLEDLGALMNFLRVKPFNGSGFAQHILSPFKICDPEIIPKLRLLVDSITLRRLK
DKIDLPKRHDQIARLDFSDEERMVYDIFEKNATDRLKVITSQGESALGGKTFHHILQSIL
RLRQVCAHGKDLLSAEDLKIMNGLSKDSAIDLDSEEYEDHDGMTPKQAYEMYKLMRDTGT
DSCLTCNRKIGPQDVADSDGESKEEVIGYMTPCFHIICGLCIGAYKSQLEELAVGGSLVG
CPTCHQQISPSMFFSLKQEEVDKEEESRLKTKESAKAGKDLSNYGGPHTKTIALIHDLLA
SRKESQARPNEPPIKSVVFSGWTTHLDLIQLALQENNIPYTRLDGKMTRIARSTAMENFR
EDPSIVVILVSIAAGGLGLNLTTANKVYVMEPQFNPAAEAQAIDRVHRLGQKREVQTVRF
IMNKSFEEKMLQIQDKKQKLASLSMDSQKGRLDKKEASIRRLEELKDLFRK
>9f581a42-e3cc-40d2-b225-9cc23d7d3321 (mRNA) 333 residues [BFAB_07:555966-557219 - strand] [peptide] name=Bfab07g01491.1
MADNKSRIPSLRLQPLSVDFIDNRLSQYRPAFGHPPSHFDPVSGNFYADKVYTQTISRSG
NLSLPMRTQSRNVGNTEPQRSGSHQALFPEMMTNFIKKYDKEPKGRCNTEYTIRSQTDWD
GVLQILIAAQATRGDARFGVTRKLKELKEKLNAHATKVKKLVPLIPSNTYTSPVIIVLNV
IFDAMKASNTVREELLKSMDSFRDSFEVIGTYFSIYHGFPEVSKAAISLGVAILKAIEEV
IGYYLQHAVFKASEALWDGEDYKKSITTSLEDTTMHGKRLHLEAQRANFRENHETHTGVI
DANNGIQQGTALLMKLYRSNLTFRSDLKHSSSH
>e2b0ba5d-a107-4b7d-9fe0-cec755aad5c3 (mRNA) 775 residues [BFAB_07:559660-562311 - strand] [peptide] name=Bfab07g01510.1
MPRFRPATTGYAQIAQAEEFSDDEEEDPLAASHASLQPAGAPRYASISQPRPHGGMYTDG
YSSPTNNRKFGHTRRRSRMGSNASGVDIKAINARLERWADEIASKFKINKVKGKSHQEEK
LEIQHSVFQAPEGMRPLTADTLASEPDHGRMTKSEFDDVVESVRVAIEQGMHPKMISQGS
SGSYFARNSDGKVVGVFKPKDEEPYAAGNPKWNKWIHRNLFPCFFGRACLIPNLSYVSEA
AAYTLDCRLRTHLVPYTDIVHLSSKSFHYDFWDRRKFYRSKKPLPPKVGSFQVFLKGFKD
ANIFLREHPWPDHANGTFRMNDTHRNKRGWKETCRPGSSKSDEGNEGAGASSPSGSGDDN
QNRRFVWTDALQQSFREELEKLVILDYIMRNTDRGLDNWMIKIDWETQGVSIVSDPPQMR
NNPDSEQPPRVVSSSDNISMSHLPAYPYRSQEPMEATSRSATPSRMAAPTMSIGAIDNSL
SWPWKHPDAWRSFPFGWLFLPVSLIGQPFSQKTREHFLPLLTSKQWWSETQLELRKVFSQ
DADFQERMFARQIAVMKGQAWNVVETLKTVDHGPLELTRRPRVCVWDDLVDIPVAVPMRV
PSAEMRRRNEARNSLDDEMDISAANATAPQPDLLGLASPSTELPNPNRFELASPRYSGDA
SPDLESSQTFANSGFSRDNTFKDGVRFSDRPHLQHSRNRMSYDGPARSPNGNRSESRRFS
FSSRSRGAVQTLYDGDDLEGDLGYAAAEGMEGHQRKVIVERLETVKSKNPVFTWC
>593f7254-aed3-41e1-a6c1-1d8bcf04311e (mRNA) 179 residues [BFAB_07:562566-563503 - strand] [peptide] name=Bfab07g01520.1
MFSRPAVRASRICCRYYASPASTPPPMLLKIRNDMKTAMRNKDSNRLSVLRSLLSQTLNA
SKTSSPINTDMQMLALLRKTANASRAASEEFKAAGREDLVEKEEQQLKVLEEYASGVETV
GEEEIRNTVKELVNAMKAEGVKMQMGDVLKRVFAPEVLGEKNVEKGEVAKIVKEIMAAS
>b907cddf-7c7a-4f5e-9aaa-862129925099 (mRNA) 179 residues [BFAB_07:563940-565307 + strand] [peptide] name=Bfab07g01530.1
MTPIDPRPATHLPSNEPSPHRGRKRRRSSAASPPPITTSTSTNFRGRVRHRSPQTSHLTT
SSQLPLSSPLNIKSTNANATMSSLTATAPKVKYQKTRASATTTTTTPSPSSSLLLCSPRS
KTRRGQSPSRSRSKDHSDDKEVPRRRQRTRSRSRSHKVANDEKDSSKGKMKAVSGTERA
>f94de115-9c8d-4451-b896-aa095fda984b (mRNA) 844 residues [BFAB_07:566506-569824 - strand] [peptide] name=Bfab07g01540.1
MVNFTVEEVRQLMDKATNVRNMSVIAHVDHGKSTLTDSLLSKAGIISAAKAGDARATDTR
ADEQERGITIKSTAISLYGNLADDEDLKDIVGQKTDGRDFLINLIDSPGHVDFSSEVTAA
LRVTDGALVVVDTIEGVCVQTETVLRQALGERIKPVVIINKVDRALLELQVSKEDLYQSF
SRTIESVNVVISTYFDKSLGDVQVYPGKGTVAFGSGLHGWAFTIRQFAQRYAKKFGVDRN
KMMERLWGDNYFNPHTKKWTTKSSHEGKELERAFNQFILDPIFRIFAAVMNFKKDEIPTL
LEKLNIKLSADDKDKEGKQLLKVVMRTFLPAADALLEMLILHLPSPVTAQKYRAETLYEG
PPDDEACIGIRDCDPKAPLMLYVSKMVPTSDKGRFYAFGRVFAGTVRSGLKVRIQGPNYT
PGKKDDLFIKAIQRVVLMMGGKVDPIDDVPAGNILGLVGIDQFLLKSGTLTTSDTAHNLK
VMKFSVSPVVQRSVEVKNAQDLPKLVEGLKRLSKSDPCVLTFISESGEHVVAGAGELHLE
ICLKDLEEDHAGVPLRISDPVVPYRETVTGKSSMTALSKSPNKHNRLYMIAEPLDEEVSK
EIEAGKIGPRDDFKARARILADEHGWDVTDARKIWCFGPDTNGANLLVDQTKAVQYLNEI
KDSVVSGFQWASREGPIAEEPMRSCRFNIMDVTLHADAIHRGSGQVMPTTRRVLYASTLL
AEPGLLEPVFLVEIQVPESAMGGVYGVLTRRRGHVFAEEQRPGTPLFTIKAYLPVGESFG
FNADLRSHTSGQAFPQSIFDHWQILPGGSPIDATSKTGQIVQELRKRKGIKVEVPGYENY
YDKL
>5a8630d9-df71-4032-9c01-c34e35ff9db2 (mRNA) 3251 residues [BFAB_07:570789-581049 - strand] [peptide] name=Bfab07g01550.1
MASSSGLTASPLRADLGFNWIFLIELIVCGIVTLFFLFYFNRVFAAIVSFGLRKWTWHQY
QVYVDIQALQISLLGGRVFLKGVRYHGDNETILIQNGYITWKYWLRNVRELDLENDESTK
KEKERESTVDTGLDHEEGPKEKKKLPCRFDIVLNGVEWFVYNRSAAYDAIISGIAGDDEN
TDRAAQSHGEDSYQHVRLRKKGVVNERGDVQDLSKKSTADSQTLPSHIEEQAKPGAPHIE
DKSDRSSANSQTADMDNDESHATVESTFLLRFLPVHIECSKAALVLGNENTKSVLIVKMD
KAEGDLDASASTKLDQYKQLINFRFEHPVIQMQPNDDYKEDQATAACKIQRGVPEQSDAI
ESRVPSHSFFHRQRKRAWHTIQDLVPYFRSSVESFSSNDDSRSNSPIQRGPNPSSWQGLS
RYLDESEQDDNARWSSNEYATVTTIADSPSATMRFYWDVPAKIPWRREVSKSASNNINGD
VPPEWGIDLVLEGAIINYGPWADRQRAEIQRVFFPSLCKDASPAKMLRPGQYRVPTQFKL
YIELDHETTLRVPIREESKNWKWTKQAETAGARQNEQKRTSNRNRRRKDDKGTPGPEVRP
FGWLDIKVGANATIRYLMDMVAGDVGFSNKLQLDLPNTEITTSVNHGLLWRSTGNVISCD
LSNPLQWNGFRTWNFDIGSRGLELFILREHIFLLTDLVGDWASGPPPEYLTFTPFRYLVN
LNLQEFKLYLNVNDSNIINNPADFDDNTFIIIFGESLIADICIPIDAFRPHRNDISFDVF
AKHGGLNLHVPPWNTQATFLNSKEIAELDSIKLGGKYQYCATTSSSNTDTLILDVHGNGA
TAQFYGFVIRYYLKVKDNYFGDDIHFRTLEEHQEAIRVKTANSQQDANVQPHKKSNDLDV
ILSISADESSVILPANLYSAKDHIRIEIATLAADLRFTNYYMDLDVELGTLAFSLGTESD
SRMSFASATSGTQLFIDGLNVSGNRLFGLPPIEPTYVCNWDFSVGAITGECTTEFFVRLL
GSVKAVAFSFDDDENALPLTTELILHDVTFLRASVDSIRIWIHVEEAAFLFSTSKIMLNF
DDWAGSHYSKKLDLQIPNLKFGCVDAESASRHRSRAQHPVETHGLIQTTISFGMILKKLA
FVEDRRLQQAHLRRHDRRTHRTDFLLHDYVMAEVDQDIVEPPAMCVPPMPPPLFYSDDLS
QDRPSTYKMSSNVSSVRRNRLQTGRKSSFLTASSSSFRSDQSILRPHSFNREGTSISASR
SRSIHAGQSHLRDLSVSTGRQSSFYSAVGEPRSLPPSNVTFSSSYMAPYFPLEAVEPDVK
DLPVLDPEAQTEITMQSPRMNLEDIQPDRVGENATHVSFIVEMPGGIKAVLSPKAVGAVA
DLLTAIQPVDPVDMIDDLQISSMGEIFGKEKKDKVHGEVLDIAVRTPGICLRFLNSPDAH
DLTSDKDETHDQYDLSIAKLAITSRSETTGTSDLIAAQAGRQSSAIHLYLGSAVLAAKER
FGDLNDPQAGVNVILEDVVFWISSGHNTAANIIFKTIEANTASSKIEYLASLVHRTNVLA
DRVSETFASKLSQQRNRLQLFTYLVATAGEHATDPLFLTRPAYVLRSAQRHLRTHDSWKV
IARLRHMYSILGPSSQRDIISRCANNSESVPEDAAQRVLASFSQWRSWDLNNLGTCVLMS
NVFGFVKDDATVAVAEAPNLSISFRTELIRLVIDPGPKQNEVALRSLSARVSVTTSFPMK
SPISVSQHGSDIDTFQNIVVHVFCEDISINLNWELCELVQDILKLYQQSESNAKVPEKPS
PITLARPKVKAKQNLQVVIATNKGSITLDTINLRSVSISNGLKVSVVSTEDIANTTMVNI
MLAAEAATSKIQSHSQPLSLYQLRNPSVYVSFENSVLDETPLNVFKVAANSQELSFIVQQ
DIVALIEVLDLVIGDEVAQLNRLIPKLPTAKRPASPPNILLPNVQEPKPINRINLALFLN
MYQISIPLIQSLTYTISGVVARASLAAQFGSEIVFDFDIKEHSHDVQTAQNDKQQSISLL
QMPPTNGRVVSSMSVEENKISVFASVEPIELDAAAVHSLFTALNRPEISSVVSDIRDDIK
AIQAHVEEIFGPSNSPVPDSPPKAGPALIYDAHLTFAGLDVYANAEPSREGKTTARLEFN
VGCVQLLVANRLETHGATYEFPEIHISLHRIMFELSRLNNGTMEPCGNLAFAAFLTATSK
KNEIGDDVRSFNLTSNGLEINLFAETASSVVDVMGHLQNKIRDIDFTREKQYLKKFRKSR
PRITVNDEPKDHDSVAGSTSTIMFASMYTLELLNIQVSWLVGNTENDRISQSEKENLVLS
LKRIDLSTRKENSARLTIEDLQLQMVPSSQDKIQRSLNSALLPEVIFNVGYISGQNTRRL
AFQAAGKSLDLRLTSQFIIPAAELQRSIGSATEMVRVASATWSASPPPTLLPPTSPNKRQ
PFFGKKRMESLLVDADFAGAVVYLSGRKLTETTQTNQAGTTGRVPHAGRYGQFTHKDAGS
STVLRAPGLAWKIEYTDNGLDDPSLNAEVKVDASTNILYPSVVPLILEISSSVKDIVSED
GKDKKSVPKTSPQKFIGADDDNILAADPSTVLGRTRLNLGLRICKQEFTLSCQPIARVAA
SARFDEIYLTVNTVRSTEHGHFFAASVAFSRLQASVQHVYSRESTGSFDVESIFLSLMNS
KHVSGTSGMSAILKISPMKVLINAKQLQDFLLFREIWVPQELREGSTAHVSSTDNVQSST
FLVQRYQQVAATGAFPWNATVSIAELDVQLDLGQAIGKSAFIISNFWISSKKNSDWEQNL
CLGFDKVGVDSSGRMSGFVALQDFKMRTSIQWPAREKALNQTPLVQGSLGFSQLRVKAAF
DYQAFLVADITSFEFLMYNVRNGTQAKGDRLVAILDGEAVQIFCTATTASQALALYQAFL
RLAQEKKSNYETSLSEIEKYIKRKSISQAMTPNPKAPVTEPKLKKSKSPVSLHTDVIVTL
KALNIGAFPSTFSDHQVFKIEALNAQARFAVTMDRGKIHSILGLTLGQLRIGLAGVKQDE
APKSVSDLSVEDVVNSVTESRGGTILKVPQVEATMQTWQAPGSNHIDYIFKSSFEGKVEV
GWNYSRVSYIRSMYGAHTKALAQRLGKPLPPSALKITGVPNAEDPQSQEREQQKITAEVN
VPLSKYEYTALEPPVIETPLLQSLGEATPPLEFFGLHRERLPNLTHQIVIVALLELAGEV
EDAYEKILGSS
>2fd9be69-70c7-418f-bd78-07fd2a99af37 (mRNA) 671 residues [BFAB_07:581213-584112 + strand] [peptide] name=Bfab07g01560.1
MMAGSSDLSGGTGEKLTNATIVVAGSAALLASILSIVSVWLQTKNYRKPLLQRYVIRILL
MVPIYSISSWTSLVSRDAAMFIDPIRDVYEAFTIYTFFQLLINFLGGERALIIMMHGREP
VHHLWPLNHVFPKVDISDPHTFLAIKRGILQYAWLKPLLGLSAIIMKATGVYSEGTISLT
SGYMWSGIIYNISVTLSLYSLGMFWVIMSKDLQPFRPVPKFLCIKLIIFASYWQGFLLSI
LVFLGAIPDNVEDYTADSLAAAIQDALICIEMPIFAIGHWYAFSWHDYADVTISAARMPV
RYAIRDAFGIRDLIEDTKETFSGKKYEYRLFDSGDNVLAHEGSSSRVARMMEGMRYERGG
KGKYWIPKPGEATARTPLLGKNAGSPGSQSPVQPRDGDSDYMGWGNGGVEQQGLDPEEEG
LYERARQLEFGDWNYHVITAHEPSRERWLTGQPDLLTTSANRHLLQPTDDNRIRRASNIR
ETVEDVTKRTKRKSSRNSRSRDSKGKNKENSPLSEEGRAPMLKGMLRQHSSASSSAKSDR
SQLVDVIVEDTAAEETERVRARKEGSAGWNETEPRRFVRTYGDGTGEDIREGFEPDDDVE
AVDPKPGLDEEFGIDGDKNHGSDQDNSEESRHWNEARQENVLLKPKYGVDGEAFENVWGS
GEPSTPPRENP
>d78cd354-261b-40cf-a24e-60991efe2af9 (mRNA) 242 residues [BFAB_07:585303-587822 - strand] [peptide] name=Bfab07g01570.1
MKNSASTRQMAEHHQKYWNRPDGRVLIFMQVIAIDIYPFQPETVPENLYLQVDDLNNRFT
FQAHNFDLVHSRLMSGAIHVNRWAGYLRDMLRVLRPGGWCQLVELHHNAQSDNGSLTEAH
ALRQWSTRYNESLNGVKDLRVAPRLPEMMRAAGFVDIEHRMIPLHTCGAIDARDYDIGTA
NRENVQQFLGSIAIYPFAERLEMPIQDVQLLVAQARVEADDPLLKAYFPLYVCIGRKPRS
RR
>a7344a31-c15e-4cfa-9770-3dd4a55b51e9 (mRNA) 652 residues [BFAB_07:593089-595605 - strand] [peptide] name=Bfab07g01580.1
MKTTWKDIQPVPTSQEFLDIVLSRTQRRLPTQIRSGFAITRIRGFYTRKVKFTAETFSEK
LSLILDGFPRLQDIHPFHKDLLNTLYDADHFRIALGQLSTAKHLIEIVSRDYVRLLKYGQ
SLFQCKQLKRAALGRMATICRRLKDPLLYLDQVRQHLGRLPSIDPNTRTLLICGYPNVGK
SSFLKSVTRADVDVQPYAFTTKSLFVGHFDYKYLRFQAIDTPGILDHPLEEMNTIEMQSI
TAIAHLRSAILYFMDLSEQCGYTVQAQMQLFQSIKPLFANKLVFIVINKIDVTRPEDLDP
ETQAQLQALLKPGDVELLQLSCTTAEGVQEVKNAACERLIADRVAQKLKAGTNSSGAVGG
RLGDVLARIHVARPMDGVVREAFIPEAALAKKKYDKSDPERIRLARDIEEENGGAGVYNV
DLKDKYMLENDEWKHDKIPEIFDGKNVYDFVDPDIEAKLAALEEEEEKLEAEGYYDSDDD
LEDAEDAEIRMKANLIREKRELIKNEAKMKKSLKNRALIPRSATRKKLSEMEDHLDSLGH
DTTSIVARARSQSRGRSQVRSRAQTEDAMDVDDPDYEAKMRAKSRARSQANRRDDGVAGN
EESRTKAERAQKLGQRKMNRMARQGEADRHVAGVRPKHLFSGKRSIGKTNSR
>1236e899-7503-49de-abfa-2f95a122d9c8 (mRNA) 232 residues [BFAB_07:596203-597077 + strand] [peptide] name=Bfab07g01590.1
MSTLSPYKAEFLKAAIDGGVLKFGSFELKSKRISPYFFNAGDFYRADLLRAISTAYAKAI
IEAQEANILDFDIVFGPAYKGIPLATATVDKLADLDSKYNTMCYSFDRKEAKDHGEGGNI
VGAPLKGKRVLIVDDVVTAGTAKREAIDKIRKEGGIVAGILVALDRMEKLPSPTGDDSAP
MPSAIGEIRKEYGIPVLSILTLDDIIGGLSGIASEENVKNMEEYRAKYKASD
>cdff457a-a4e0-4a12-889d-1136fea042e3 (mRNA) 272 residues [BFAB_07:597064-598514 - strand] [peptide] name=Bfab07g01600.1
MSENEQREGTPQSPILSESPNPVTPRQFDDQQEPQRNFVIIPEDQRIKNFHMYSNSHRDL
HPYTRPLTVSDLESVFALENIAFEDPNERASREKLRYRLTRCGELCLGIFCTMIPGSDPK
IETLATGHPVETSRRNGAISVLIGHVIAAKTHDTTASDASMGVPEGWEATKPPRTNVGHQ
EDGRTIVLHSVAILPAFQGRGLGRVLMAAYMQQMNGAGIADRLALIAHDHKVNFYKMLGF
LEKGKSDAQFGGGGWYDMIYELKTPEARTAYG
>53a1111c-3a2d-491e-ad32-4ad27c88fffe (mRNA) 433 residues [BFAB_07:599813-601704 + strand] [peptide] name=Bfab07g01610.1
MRITLTITAPTDDDADLISLEIPQDTTVGTLKESVQAESRIPKRDQHLYHNGQLLHDDNK
TMEQLQIGDGEMLALHVREYRDPPAATAQRTSQPSRAPQGRGGQQQPDPETIRLQLIGNA
EMRREVARQNPELAAAADSPERFAAVLNQMRSREAGEEARRRQQIADLNADPFDVDAQMR
IAEMIREQRVQENLQNAIEHNPEVFGRVHMLYIDVEVNGHKVKAFVDSGAQATIMSPKCA
EDCGIMRLVDKRFAGIARGVGTAAILGRVHSAQIKIGSMFLPCSFTVMEGKDVDLLLGLD
MLKRHQACIDLSKDKLIIQGVEVSFLGEADIPKNMEDERAEEPQLEGPGGTTIGAKSGAV
SGPSTGQQAPQSASSAPATSASSAPPPQQQQPSFPAENIDQLVALGFSRDEAVNALAACG
GDVQYAAGLLFQG
>2faf188e-796c-4212-bca0-34c515493e07 (mRNA) 498 residues [BFAB_07:601702-603612 - strand] [peptide] name=Bfab07g01620.1
MFAVPGWSVSSSLLKTQKAEPVAAASKADEEGALAETKSSKKRKRAKNPDVNAANLSELW
DSVIEGKPKAKKVKNSEKDGETKEKKEKVAKEVTTDEVESKPANLSNESTEVSESKKEKK
QKKNKKDKKDKDSKPSDNDQSTKDDTSSKAPPPPKPAAKLTPLQASMRQKLISARFRHLN
QSLYTTPSAESLATFQQNPEMFTEYHEGFRRQVEVWPENPVDGYSLQIRQRGKLRRDMRG
QPAQEKTDLTPLPRTDGTCRIADLGCGDAALSTGLQKDLKKLNLKIHSFDLQSPSPLVTR
ADIANLPLEDGSIDIAIFCLALMGTNWIDFIEEAFRILRWKGELWIAEIKSRFGRVGGNN
KKVVEHSVGHRKKNQPVNKKAIKAADDEENEADLMVHVDGNEDNKQETDVSAFVEVLKKR
GFVLQTEKSVDLSNKMFVKMHFVKGATPIKGKCVPVPKGMPEGETWKKKPKAKFLDEPED
VPVSSEASVLKPCVYKLR
>e24197be-1d9e-4dc5-89ce-3f56de099c3b (mRNA) 1028 residues [BFAB_07:605108-609707 + strand] [peptide] name=Bfab07g01630.1
MNLEKSQDLENEEEEEEESLAGVRKPGSKAQGRKRTKTGCLTCRKRRIKCGEEKPTCQNC
SKSKRHCEGYIQRVVFKDPLSATRGPFANSSQTTFSSGSGRSNQRRVEAPKTSPIPQVQL
PNLAPKPGDSGTYTSPPSRPPNEIIQGLEQSIHVFSGRATQDAVVQRNTSRETPEAKPAQ
RDTVDRSYLPTPEHRSPPGSGPTHYDFNALFEQQSPSGNFPVMQSSPSPWIVDQNSTPHA
YPHKYAQNTNPQFSLLSPPMVTTQSNSSWQQPAFSHPPNLSSSMSHAPLTNQVTPILETA
YTPPFDMAQQASHISDGTFSHHTVTRNTDDHIINKNNYATIGRGNERTFDDDEMSLDNDQ
WADNYEYDNFNAQKNMEYGIGQVIALQARQNAQDQSLRSFTSLLDRSNMLSAYNPSLRSS
PLNNSMTARIFCHFINVTGPSISMFERNPANPSLIFQGTPVPSSQQHIWTYTFPMLALKN
EALLHAMLACASLHIAKLQNTHITASLKHYAISLRRIAKSVCVPGRREHPATLAATMLLA
FYECWCADHQKWSNHLLGTRTLVRDIDFTGMTRHLKDMRAQLRQEDRAKYRQEQIHMGKT
FIEEKRKFAASLEDVDENIVGVLMGRRLRYDDFGHIIDEVWEDTENRIYSPKDIETYEMQ
RDLVWWYFKQDVYQSILSGGKLFTEYDKWSLCPPRAPLGRLDAVYGTFDHLILLMGRLAD
FAAKDLKRKTLAMKAANNPMGNQMPNFAGMVPNVKEPTLPMGFSPTHTSSPQSSEGGDVD
LETQRLEAEEEWQDIRNAFSVLEDHFGEDFQPLGDEFSTPAQTPFGPALQYRTYGIAGIW
MNYYMGLISCHRSHPSMPPAAMLAAGMAARKTAFFANELGRIAAGIAPDLSMTPQVNPGV
GAALMESTTCLFMAGVQFQNPDQRTWLICRLNDVARLTGWETSLAIATGCETSWVKAGEM
GRGPPYTRTRDERVNPQMVNGARNVERLKIQHQQATDQGFVISIHQRVHYAIGILGVQDD
LNNLDLDQ
>fc6c41ad-967a-49df-8b78-b24350ad76e1 (mRNA) 469 residues [BFAB_07:609936-611841 + strand] [peptide] name=Bfab07g01640.1
MFFGKSTGKKKAGESSSQNEIPNMAQCLAANRSKHDNEHINAMVFQDDYYRDRMRNMQAT
YKVKLDSLPGLGYVSRIKLIWDHDRLLGTFEMDVFRGSLLIDPGPSQEHFRADIEYSKFH
EARAKDKESSEESGDDKDDADDGDDEIATTREYRFKWRGMNSKIPHKTFNSSFTVGKIRF
GNGKIWGYFEAMSGVGFPGGRCEFHGKIPHGPCLVDMTIQQFIDKWNGYAEIEEDEEPRS
PTPRSTMAMPQSERDGADSTPSPKGDTLQVEEWTEDDQKSFVEMITGIYDITSKEIEEDW
SSKSKGLMVRLHVDQQQGRVLGFFDIGIVEGFFCLDDEIKDLAHNDSMGFKWHGKGTFSG
SSEKGTGTITIRARGGRTVEGVFCGMPDKNDGEIDFRGTKRVLPLGVSGRGAGYYRAQWA
DYTRAKLDVPQQIGHKGRWGVRQELAKRVSWNRSAESAKETGAPKKGSG
>540adb05-b2a6-45c8-82cf-3ca5b0a1e20a (mRNA) 706 residues [BFAB_07:615080-618142 + strand] [peptide] name=Bfab07g01650.1
MMDHAGHALLAANLIYARANTTNGTTTADADTEVRPPIYKAIGISLAVASGVFIGISFVL
KKIGLLRANEKYNEEAGEGYAYLKNALWWSGMTLMILGEICNFVAYAFVDAILVTPLGAL
SVVITTILSAIFLKERLSMVGKVGCFLCIVGSVVIVMNAPAEASAATIQEMQHFVIAPGF
LSYAGVIITGCTFLGFWAGPRYGKKSMLVYLSICSLIGGLSVVATQGLGAAIVTQIGGTK
QYNQWFLYVLFVFVVCTLLTEIIYLNKALNIYNAALVTPTYYVMFTSSTIITSAILFRGF
KGTPTSIITVVMGFLVICSGVVLLQLSKSAKDVPDAAIFAGDLDQMRIIAEQEQPETEPK
ADAIRGTAAIVRKFSSARHKMEMEEAKRLHEESHLQPLGEDEIVEWDGLRRRRTTIGSNY
SASMRSRANSSVPPLPENMQHPTHRATLPRTPIAHPPLGMSHFPDPEEDRDEEDRPGTGL
SSSIFGTIRNRVARGKSLSSGTNPVVNLQSPTRPVPLTDIRTYRGGDGNIYKSENSDVAY
YIHDDNTSGLPPALRDQKTEYTGSGGRHITIAEDLVRPISRASNLVPPTPPPHSAKRQFS
FQNVFRKGGGPQHADGPPQEVRSPDRKRMGSRHGSDEIVKGATEEERLGLVKGDTRTQSP
SGTSSAPSFEEEEEELEPWSSEIKGYRRNRSPPRRDPALGEKGSFL
>19150545-89a2-474e-a37a-7ce305702f52 (mRNA) 366 residues [BFAB_07:618586-620216 - strand] [peptide] name=Bfab07g01660.1
MLSTELNSPLNTHAADVEEPNWSEERPPPYNSTSSYLTGPDKFENLRLDDPKDTNDEICN
KTAQASTRWTHTSEVIISPPSQAYFSDMKSQTGITPPPFSESQRTQEQPPPISKPPEIQQ
TRIQESASQPNIEAPQSSTWWSTRWSTAWAQAFGETTTTPNQIHIPSPKALNKTLSRTPN
PNPNPIHTGRNPHQGFQQTQTLLANQLMNRRRTCTNSRPQEPSPELRKIYEQAARTFIDL
IQTLILQSEGPNQRVDDWTILGMLDAQYAIAGEGEKKPYLYGEWEYLWAVHEDEIATGGH
AMRGDDSGAENSAQDGGVRRMEYRVPTREDWKWWCGEWKKVPGAMRGWKAREEIWPWQRR
FWAGVY
>018e1d5a-d4d9-4c2e-999c-ca01fad8c6f7 (mRNA) 256 residues [BFAB_07:620320-621312 - strand] [peptide] name=Bfab07g01670.1
MLFSKYLSKTPNQLELHKAALLYHKQKHAFRPMQQVQKSPIHLPEESIRQKVGVSSDSPI
SIGNVFQDGISSLPVMHLPEHHLVRLRKSRTQKSDNVSHKTSIHTNNLSRARAPKPKIRI
FSNRHSKEPPKTTTEEKTNTYIKAAAEAAIKPKPTRLVLTPDSNWSLSPPENASTCNLAR
GASTEQNHDYSENTITVEKDHTDEDVYHDLQSKEINETVAEEKLELDIRPSEASKVGIYQ
GWKRRILERSGAKEVH
>e051e057-bff4-4a97-897b-31da6bd7e359 (mRNA) 189 residues [BFAB_07:623158-624239 - strand] [peptide] name=Bfab07g01680.1
MVASEAWLASEKYLMLLKDSVPDEDPLIPLVITSSLSIQTACSENPPLPALAKEVLWYSH
EKKIKEFHNIPYSPYVIRLQEFSARINNNDNDKTLPIPLSCATLLTKNDLQDAKHKLIEQ
LIRNQMKDFDSTHGTSYKLTKLHQFEGLEWFDESYDNAVIDFCGARKDQIELDKLRYEAW
QAGARWRHA
>e6a143b2-5a86-4e4f-bc18-7af9416e874b (mRNA) 574 residues [BFAB_07:626144-628133 + strand] [peptide] name=Bfab07g01690.1
MEKTIGLLGGGQLGQMLCEAANPLGVKVIILDAPNSPAKQVNAKNDHLDGSFIDAEKIRE
LAKKVDVLTVEIEHVDTYVLEELANSGVEVQPSWKTLRVIQDKYLQKEHLIKAGVQTATS
QAVEAGNLEEFGRTHGYPFMLKARKDAYDGRGNCPVKSESDIKNALEVLKDRSLYAEKWA
SFRMELAVMVVKTENEVSKDGDSTIAYPVVETIHEDSICKLVYAPARGISSELQKKAQNL
ARKAVGSLWGKGVFGVELFVMEDGEILVNEIAPRPHNSGHYTIEACPTMSQYKSQLLSIL
GIMPSFPNSTIPSMFPATIMLNILGGASKDSHKELMQQAAAIPTANLHMYGKESKPARKI
GHITVIGSSMAQTEQLISPLIALNDNMRAERKGLPKSTSTTISSPSSPQKLVAITMGSDS
DLPVLKPGLAILDSLQIPYFVTITSAHRTPQLMADFARDAASNGFKVIIAAAGGAAHLPG
MIAAQTPLPVIGVPVKGSTLDGMDSLLSIVQMPRGVPVATVAINNSVNAALLAARIIGAS
DSAVFAKMEDYMKKMEDEVVGKKGRLEEVGWEAY
>47b2edf7-c582-4306-a7ca-64df21f734c9 (mRNA) 323 residues [BFAB_07:628134-629819 - strand] [peptide] name=Bfab07g01700.1
MSIKPPSKSVFVGNIPYGLTEEQIIDIFSSAGNVVNFRLVYDRETGRPKGFGFAEYPDSD
SAASAVRNLNDYEIMNRKLRVDFSNDGGEEENSAPTYQPPPLNTNGLPVPPPSLPIPQAS
NTSPLPPLPIGIDLPQGLTCPDAISRTLNTLPPSQLLDVLSQMKTLASTDPQKATELLHQ
APQLSYAIFQALLLMGLVQPEALSSVIESSVAAPVSAPPVSSIPPPVAAIPQYGNSAYPS
GYPPPPPHMSGQMGLPMMGTPPVQGYAPPPPQQRQAPPPPAQVAEPDADALMAQVMAMPQ
ELIDSLPPADRAQLMALRAQFRG
>d5af9da7-43d9-4ccb-8030-6bb5c580652c (mRNA) 307 residues [BFAB_07:629951-631341 + strand] [peptide] name=Bfab07g01710.1
MSNNPQDVFKRLQRMASEAGRNGGGGPAPKGIAGGVATLIALGGIMVVGNNALFNVDGGH
RAIKYTRLGGVGKQIYSEGTHIKIPWFETPIDYDVRAKPRNVASLTGTKDLQMVNITCRV
LSRPRVDALPQIYRTLGTDYDERVLPSIVNEVLKSVVAQFNASQLITQREMVARLVRENL
SKRAARFNIMLDDVSLTHLAFSPEFTAAVEAKQVAQQEAQRAAFVVDKARQEKQAMIVKA
QGEARSAELIGDAIKKSRSYVDLKRIENARAIAQIIQEAGGRNKMYLDSEGLGLNVTEAF
EDKNKKA
>5601332d-6864-475a-be6b-97eab14602f8 (mRNA) 735 residues [BFAB_07:631967-634688 + strand] [peptide] name=Bfab07g01720.1
MLFTMRSSLSLVALLSAGLANGTYTNSTPTFTPQAMLSSPRRGSAIPNADGTLALYTVAT
YSFEEHHNAHELRVMNLANGTSWLFSNSSGISNVNWLGDGSKIIWFVSEEDGSTSFVVGD
ATAPSAEPISAGSVPGAVDNLKLVSIGEGTLGVAFSGQALPNGTLYNSELAPTPYSTGRA
YTKIFVRHWDTYITPQRNSIWYAALSTTGNNYTLSEPINALNGSGLESPVPPFGATNSFD
ISSKGLSFIAKDITLNQATTTKSDVYYVPLTTFTETSPELKVISTPNLEGASDAVVFSPS
GSSLAFVRMAHISYESDKNRVLQVADVTSDLTAIEFFASEDGKGAWDRSPSTLLYSQDGE
SIYAVAEDFARVRLFTFTSDPTNTTLPSIIFKDGGVTDLHYQGEDKLLISSSSYLDNSVF
SSVDPIVSAATNASSGITTISANLNSLKAYGLSRDFISDVFYQGDGDYLVHAWIIKPSTF
VEGQKYPLAFYIHGGPQGATEDLWSTRWNMAVFAEQGYVVVAFNPTGSTGFGQNITDGIQ
NQWGGRPYNDLVKGWEYIEENLSYVDTDRAIALGASYGGYMVNWIQGQPLGRKFKALFTH
DGCFSTLAQYSSEELWFMQHDFNGTLWENFDNYARWNPANHTDAWSTPHLINHNELDYRL
PIAEGLAAFNVLQAKGIESKFLSFPDENHWVLNQENSLVWHKTVIDWLNEHVGLPVYSSP
DDTDYRAVLQNGPWI
>0a91fa1d-8617-46ff-b776-8905a36431b5 (mRNA) 227 residues [BFAB_07:635257-636366 + strand] [peptide] name=Bfab07g01730.1
MSFASEKRNASRASSYTFSPKASQIPEAPSPVLPPNIHPTTFCAIGAHACDLDILSRLHT
QTVRAMGRDVSREEFYLRMEGRPARSLVPISPHSSINPFSSSNTKINPGYQTSGKSGTEG
GSAGSRSNSLRSGVSTMEEIEPDQKFRAFVARCVGITPRALFMGVGATERADRKVGRGPG
LTAKEEEEKGVYEKVDWGDGISEFDAWVDMVCKEVLAMRRRLDASRG
>245e3ec7-f6ba-4ffe-8521-3f84bcb389ad (mRNA) 604 residues [BFAB_07:637280-639744 + strand] [peptide] name=Bfab07g01740.1
MIVLDDRSTMYGLPAAGSSPQIDRNSSTTRDRTEIPKPEDEELVTVPLAKLQQLVEFGIQ
VLKESRMRTNVRAIDLEYNAPPDLQDFPVLQSYQARSKVPRPLNRPEYLHQFLTRACANP
WPVRKIEVNRDQVIHLDHLRQPFNRFNSAHFEAIWENHFRTFFGYGQRSVTATEKVRRGW
FWKRILNECEKEMVPWLLEIGTDDPDVRAAILVKIIICIIQSSIERRYSATSTIGAILER
CYTSGVLRQPEDIPSNPDNIQLQTEIRQDYCFHIILVAIALNIFNDCLMENKSELGLNSR
QMLWSPKDLLREACGGANLEQILAFQGPELVVSILSVSKSSDVPVRFESLATNSGRIDDL
NIGSLQTIGGLRIVWTDIFEEHLLLNHQSKCLKVARLRPFIWGMLSLFQNDCVRWSSIYR
KPRELSVLKELKADIEKTWAILFSITTLGENSKNKLRVRDKLKQEYETIIDEDRNPMHID
IQTLKEYHMPWIEDDSATGRVQSYYESRWENLLGIIKAKQDKSTIAYSNFGMFEDRVRDL
RQYMDNQEQHGLRQLLRDSRDALNYYTFMGVIIFGLLTVFLALASFFVSVAQTYAAFKAL
DMPS
>49c64c6d-5276-49fd-ae91-ecbae42f2829 (mRNA) 1202 residues [BFAB_07:642459-647135 - strand] [peptide] name=Bfab07g01750.1
MEVFVSNVPVQTGEHDFRNFLRPRVNSLAIRAFHCHTARGNNFAKITFRTATDGEKFLRK
FGERRPNNRQRNPRASQPKLIYHSTPIYCEKSNQIANPYLLRCLEKEEVERAETSYLKHG
PPIANTSFECSSIMCGNWNYVGETLVFMPELIWQSNIIAHFKERAMILILGNGLRMVIRY
DTIELLTTDDGHYLGITATLHQSPHFFRSPPQEDLLLQITYMLSNANLRNGSRPQPRSRV
AGFDERHKEIAGSSLVYRCTFKNVNGFSSDIEQKIESLKNARGIPPMIHHSASIIRPRES
HIIGLRKLYQALESFNNELPFPLTFQIQKLAQNGYLSPRQIIDLLPTFTSMFERTTLPIC
VTAMRRLFLQIPYPGPNVKAEDFDKNAIIELLLEVEKASTREALYAEGFGGTASQNAALI
HRVTITPAGFYLDGPEPESNNRILRKYAGNHSNFVRVTFCDEDGDRLQYASNASNDEIYN
GVFRKVLQDGFSIGKQKYEYLGTSHSSLRTQSCWFVAPFTQNGIYYDALHITQDLGRFGD
IRSPAKCAARIGQAFSDTPNTLTLDETVTVETVPDIERNGRVFSDGVGTMSEKLMKKIWD
RLPDKYLVKPTCFQIRYRGAKGMISLDSRLPGVQLRLRESMIKFEGSTSNDLEICGGAYK
PLPMYLNRQFIKILEDLGVEPGYFMRLQAKEVSRLREITASAYNASTFLQSKRVGDVVLL
PQLIEHCSALDLDFRNDLFLRDILEMTVLIELRTLKHKARIPVERGYHLHGIMDETGILE
EGEIYCCWIEDGKRTTLVGSNVVITRAPALHPGDIQLANAVNVPSDSPLNRLYNCVCFSQ
KGARDLPSQLSGGDLDGDLYYVIFDEDMKLKRTVKPADYSRSLPLDIGRPVKQEDMADFF
LTFMKTDQLGVISNRHQVYADQDVMGTECSNCLRLAELCSTAVDYSKTGIPPKLNDPNVP
RHSLWRPDFMAPGPHVKISHRPDDRLGFAEEYIPIEAMDEEDEVTNIKYYESKKACGQLY
RAIDERKVFEDIQKLNVQANDSPDVIQHMWEFVKSRSQGIQWQHLRKDALEIQEIYDNNM
LDIMHQYSEHPTRPISEREVFVGNILGKVGSVSKKQRELCISMKEKYDETAVFIINCIIK
VDDEYSEEALERSIACFAVSLDDRKRRGAREEPLKSFRYLAAGVCLREMERVPGLLPNSW
QG
>39f1f252-6c9b-45ef-ae63-2b882eb0d2ac (mRNA) 706 residues [BFAB_07:651587-655322 - strand] [peptide] name=Bfab07g01760.1
MKGRSHQHARHAKRAELNQEDIIAAPIEVRQPDPEPALQTIVSVVYVTAAPTFSGSIAGY
STVGQEDETTSAEETHSSTKATVAKTTATSSSESHSTTAASTLKTSASSSSSSSSSSDLP
SSLVATTSVGSSVALLAATDNVPTSTAVASSTTASSANASSTAAADSSSSGMSAGGKAGL
VVGILLLLGVGLALLLFFFKKKKQAAKAERLDDEKSAMVASSARRAEATRAEIQRQASQR
SNRGGAAAAAAAHRLSLRPVTQFQPFNEKNGASQASPQMGGMLTPVLSAPSYHSQQPQDQ
NRDNPFGNHAESIDTPNTNGPPIIEGFNDGGEVIAASAVVATAAAASGSNAQAPAPVKPV
GLARSASKAGNGLKMDFTTKTNTVLSPPSPSGSEFSTASGATQAQSVTGMAIAAAGGPPN
TTVHRVQLDFVPSMDDELELKAGQLIRILHEYDDGWALCIRLDRSKQGVVPRTCLSTRPV
KPRPQQPGPQGPPAGPPRPMGPNGQGPPRVPNKDGPPYPSSPMRPNGPPNGPPRPMGPNG
QGPPRGPGMMQGPPRSMSPAGPPRPMGPNGQGPPRGPGMMQGPPRSMSPAGNRPMTPQGQ
RPMVPPNHPNQQRPMTPQGQATEQTPASPPAQVTEQRPITPPNHEVTQPSEGRARSDSDT
DPISRQPSPTLNTSVPTISTSSPSSPPSVPNIRSPVERKPVPGQAM
>19eb18cd-a656-4792-9639-67c3d05cb89b (mRNA) 621 residues [BFAB_07:660098-662393 - strand] [peptide] name=Bfab07g01770.1
MDYYSPPPAYSETPRSPRPHDGANPSQVWRKPVAPQQSTATPSGSDIDNLTKYGRNPPED
NKAGNHSSSYAAQTVTSQSQTAPIQVADFETLQIPQTRTNIERTISAPAAPLNVPAFHDL
PKVTNETSEPSSYVSKAFQEARHFAGGLITHPSESTKHFSILRHSHGLVFYQGCSTTLAV
SIFSDAPLPPDRQVWLQDKGWSGNTGMRLKAFVGNNASWIKVTPTIPISAEQLKESDERA
WQRDIKKFLKKTKHPKHILRETLIIRIPVEASDGYFHLVLCQGEKKKVLCPSPVFRILSA
SASPSSMRGASLSTLPLEIGAMAMTVYANKIIGGLVSPVTSTAMKVAQPFMPSKTRKEAA
VALYGKSGTEEMVKSTITNGNIQYKGVRSFSYNQAGSGDNESGPRAPYPICFIARSEIEI
KEGDYFSMPTMTLSGIAEHISHQLRGHYFAWVRRRPDKGAPRLDTDIWSQTVISSLPMHP
SNLHKATIIEASKRIFKIHFISDCFESPVYDMKNLEIKVMGFIRPDAHPVSSNEIEEELV
ASLNDIIFAQSILDQPVFAPEIEGEGQGRGLLERATTGYADVRLRAQREMDRVPLHRMGL
RMEVDRLRDEGVGLNGFYVVR
>7099cfef-e71e-4d68-9a40-dcff81eb4ec9 (mRNA) 525 residues [BFAB_07:664900-666967 - strand] [peptide] name=Bfab07g01800.1
MSKFKNSTLAGLIGSDSEDDHLVERAMAKQQPKDNTAAKKVRGRPKTAPSKVTKIKSPAR
RTSGRINGKPTPESSPQAKRGRKNVHTAKNNRQKNAGKEAEQIDETEDVTMEDVVSGDEL
DTEVTVPEEVEAKSTKKTTATRGRAAKTVVPEPEIAEEVVAPVGKKGRPGRKGKAKVQEE
PVAEQESPEKVIQETQVPEMDMELEEDIEEPEQEDSIPEVKRKESRSHNDSRRRQMPVSR
HRAGSASDTERNEPAVRRRLGELSKKLEHVEVKYQDLRDVGVKEAEKTFDRYKKAAEEKA
KVSNELIASLKANLATQTSLAKETRNLKKTIESQDALVTNLQAQIHQLELSLSEAQVENK
TLSTKLAANRKITASYESANVKVPGSAIKANGGMRIIGSQEAAQAAQAAQLKEDLYSDLT
GLIIRGVKREAEEDVFDCIQTGRNGTLHFKLGVESEKMADGDPDCRYTPLLDPSRDKPLL
DLLPDYLVDEIEFPRPQAARFYARITRALTEKPASMGGPVEESDE
>b44c6731-2e40-40ec-aa4d-958ebe8b875d (mRNA) 419 residues [BFAB_07:667138-668870 + strand] [peptide] name=Bfab07g01810.1
MMGDGNSRKYGLLQDLLLIVVSTASFYYVAKSLIPALPFQNDAEKEQHEEARLKAAANLR
RLNRRGSDDESDSEGTVSGRGKSRRPRKEDLILDQYENQIAMEVVAPEDIPVGFDDIGGL
DDIIEELKESVIYPLTMPHLYSHSSPLLSAPSGVLLYGPPGCGKTMLAKALAHESGACFI
NLHISTLTEKWYGDSNKLVRAVFSLARKLQPSIVFIDEIDAVLGQRRSGEHEASGMVKAE
FMTLWDGLTSSNKSGLPARIMILGATNRIQDIDEAILRRMPKKFPVSLPSNSQRRRILNL
ILKDTKTDPNNFDIEYLTRVMAGMSGSDIKEACRDAAMVPVREFIREQRERGMSMSGVDH
SNVRGVRTEDFFGRKGGGQIIKDNHARQIAAETSSTTRGTTTSSDGYEDVEESVAESMD
>c994c7d4-4a29-440f-8a42-6fbb3fc9c7cc (mRNA) 459 residues [BFAB_07:669102-671080 + strand] [peptide] name=Bfab07g01820.1
MSSPSGSSQASGAGKANGALNKAFPHIDLDGHNLPPSPAPSSPHNGRRYALATELVYTET
KDQYGASSMPIYQSATFKQNLAGGGSEYDYTRSGNPTRTHLERHLAKIMNANRALVVGSG
MGALDVITRVLRPGDEVITGDDLYGGTNRLLTYLAANTGIIVHHVDTTTPDKVKAVLGPK
TAMVLLETPTNPLIKIVDIATIARTAHELNEKALVVVDNTMLSPMLCNPLDLGADIVYES
GTKYLSGHHDIMAGVLAFNDPAIGDKMYFTINSTGCGLSPNDSFLLMRGIKTLAIRMERQ
QTNAQAIAEFLETHGFRVRYPGLKSHPQYDLHWSMARGAGAVLSFETGDVALSERIVEAA
KLWGISVSFGCVNSLISMPCQMSHASIDAKTRKERQMPEDIIRLCVGIEDVNDLIDDLSR
ALVQAGAVKVTLDGFHAIDAAQAIAEVPIAESDAAAAPL
>f28bf1ac-7982-427e-bc3f-0e0165f6ead2 (mRNA) 459 residues [BFAB_07:675738-677728 - strand] [peptide] name=Bfab07g01870.1
MSSLQNTASPTMDRRSSLRTRVPKLTDIKGPSSSARKSLRQLLRQPTTATETVALSPMNT
TAAEFVTAFTPRTYRSIYPKLDVVPVSSEPAEQIAIVTNNSSSSASPKKKMRLRKQIPPS
STNKHAVSGISSLDLETSTQANSTKESPKAYDKQSVINSARTSIPLASTHGIISDLDSQD
EDKMPARKSTMMPKRSRSSSQNSSQNNKKRSRQMLEEPEKICMISCGIGGQLDEYATFYF
TETDFKALLETAPHFNKFRKPYSNSIYIRGYMALSSRVIIQWLTKGTIMPLELHKPGRAD
GFSNYPFVHTYIMANDFDLPEMCDELMDTAMRELWGSGDEAVILPDARDLYTVYSQTHPG
NPLRKLYIAVFDWLLTSDECNRDTGRPRISSSELWNLLSRSENAGIDYINYCRSQITDRG
TYEHPLDPRKWNLCELHQHFPFNDCPMWIKQRNAVLEDN
>331bfd8c-6811-4084-a4b3-73e5ff30228a (mRNA) 1422 residues [BFAB_07:678174-684530 - strand] [peptide] name=Bfab07g01880.1
MADIIGSRGRDLPVLRPGSLTSPQGTTQSLRGKAEVARSSSSHDSVDLSGTLQDLDEQPA
NLSRVFPGGLGGGGGPGLPGMGDGKTDLSGIGRSAHDAEAPIPKPAGTDQGLNFMIPPAP
VKPKPQQVDITQFKNPDGSYDMNRLEVVLSTRARNVALEKKAERRLQRSRSPKAPVPATK
FPDTTQKTTPLGRAEEDHPLHGGRGTQPLRPRRNPNLSPIAERSSIGSKDTENIAGQKMT
DLPGGGDDLGTGKGDSDKGKQSTVEEDKVDSPAAVVSIADDEGTLYGASPPGEPDQKPLP
SDSNTSSGQSEMYRKWAAEPAESPTIEEKFQEWVNRGESSEGKTAAQELEAWALKDLHDA
REKHLAWLFEQRSKANLQLKIETDREKILRLQNILNKCTIAIREAIKLEDKLHNRELLKK
NVELETNIPLKRRLDALLQEMNRDIERDEQVEKERLKIHMNTENVWKRVLDMTPAEREAL
DIQTVHHFAAPVQRPPMILRESFAEKLLRDKWEKEDAPQGFEELFGRIGSFSDSEERDLY
CGAFPEIRLPILLQRNKELVDLWKEQADEVKADRQDNWLKSEAEAEEKLLKLRQLEKPRN
EEEEEEKKRQFLDALAATIAKRRVEDSEVDEKIEDIEGVFKMPRPSTKTGEGPGRKGLLS
VTTVPIVAGDGGEDEASVSVNVALTPKNSEETVPQTSNPTEEEIPVPEPRPQSPFRAKNP
LSPILDQRSGITFETNREVTDFLEYLAMVRHNEQVVKTGKGERIDPELMREKEKKVMDPG
PIDSGEEEITQKRIRIAKRRLEIAADRRKMPEDELRALEEKEAKQRKIAKAKKDLEERAA
REIEGELRLEEDKRNQKLKDEEIARGMAEAEEEEKRKIREELVQKAKAEKERIEREKKEM
AVRDKINKEREEKEKADKIARDKIAKDLKDKEGNKKPDTPQNFAEDILTKIKDDILKKVP
GVYDSKTADAEKMNLGKKDIDKYIKKSVKNFEEGHTRKENMGKGKDKPEEKPPAESDAAK
KEREKKERAEKVARDAEELRVKKEEELAKKKLEAEKNKPKKDWAAIEKAERLAREERERE
ARKRLSLAKERADELKNRPALTAEQKALAEKKSAQLQKEIQATEDEKKRQDKIVQDKMEP
WRREFREQEEKNKRDKEEREKIERRLRKKEEDRLLREKEESKKKEKAKGYREAAALNDGG
QAVGLLQNIARRIRFPDLSWLTLRGPTHLQQRAEDVTSNPPRASIRGPAPVDYELAPATI
TWMHAHAYKSSALREISLNLTILTSSRQHLPDAPPPHYLACHDIPVFWNISQLKRHLSAI
MRKAKVGEKRTMRLRIERRWLKHGSKTLAEEGIRDWENMVVVIVKKGENVREGDWKDCIR
EADGMAGWIEGWPGKGELMTPEDRKAWLAEAFKAVSGPLDNL
>d715ab02-7928-40b4-b2c7-388a8bdbaef8 (mRNA) 409 residues [BFAB_07:684969-686715 - strand] [peptide] name=Bfab07g01890.1
MFSRALKTRSAAPLRRNAISRAALVKRTVTTDAASAHADKDAVPQEDDKPFTLQLSDESF
ETYELDPPSYTMETTKKELKQMYIDMVSMRRMEMAADRLYKEKKIRGFCHLSTGQEAVAV
GIEHSLTKEDDIITAYRCHGFALMRGASVKSIIGELLGRREGIAYGKGGSMHMFTKGFYG
GNGIVGAQVPVGAGLAFAHQYNGNKNVSVALYGDGASNQGQVFEAFNMAKLWKLPVLFGC
ENNKYGMGTAANRSSALTDYYKRGQYIPGLKVNGMDALAVKAAVKHAKEYANAGNGPLVL
EYVTYRYGGHSMSDPGTTYRTREEIQRMRSTQDPIAGLKQKLIEWNVTTEDELKAIDKEA
RAKVDAEVKEAEEMPFPDATPQILYEDIYVRGSEPQYMRGRTNDENYYY
>93fb624b-759a-4aa4-b72f-08ecb546c43b (mRNA) 697 residues [BFAB_07:686925-690498 - strand] [peptide] name=Bfab07g01900.1
MDNFRPLSLTDRRASIAPIERDGEMSPTRALTVDTNGEHIPMPQRLEKILSRPRGPPTPN
MTTSSADIQSPTHSSHDPPPPPTPAASPGPDHPQPDWSEAGEKEDIFLSQIRIYFAQSSA
PERTRILGDLLNLCTSQQLSFVHQYVSPLLKKDPFTTLPDELCLRILSCIDDPKVLARSS
QVSKRWRDLLADDVTWMKLCAKHDYGRRMSENHPVAPIIPSLRPPPHPVHKALQAGENSA
LAQSFPRISAGLSQVPGSSRSFDSATASGALRRPKIRSYKSHFKQRYLVETAWRTGGQNI
ARHITQDQGVVTSLHLTPKYIVVALDNAKIHVFNTDGNAQKTLTGHVMGVWAMVPWEDTL
VSGGCDRDVRVWDMAAGESIHTLRGHTSTVRCLKMSDANTAISGSRDTTLRIWDIKTGVC
KNVLVGHQASVRCLEIKGDIVVSGSYDTTARVWSISEGRCLRTLSGHFSQIYAIAFDGKR
IATGSLDTSVRIWDPENGSCQAILQGHTSLVGQLQMRGNTLVTGGSDGSVRVWSLEKMAP
IHRLAAHDNSVTSLQFDDTRVVSGGSDGRVKVWDLKTGQLVRELTAPAEAVWRVAFEEEK
CVVMASRSNRTIMEVWSFSPPEDVLYENSYGQQTPPITGPARPSSAIEYRSGSQDQAMHG
IMTHEASYQRDDIEMVDAGPSTAPPQATRPTFFNEED
>8e4868f8-4d3b-4dff-a94c-2f89d7adad3e (mRNA) 405 residues [BFAB_07:691794-693665 - strand] [peptide] name=Bfab07g01910.1
MFDGLFMLLVLSVIMCLSCFLAGAIPLSMALSPSQLRLISTIGMGVLVGTSLVVIIPEGI
EAVYTAGSSAHAHGARSIAIQERTSELSWVGGVNTIAYSNKAVINRRRPHLNSRTSQPME
VEIVTRESLAQEKENGAPEKSEEKPAGESDVHHDEDESPTFWIGLSLILGFILMFLIDKV
PRHASEKLQAPVAPRQISLNNLSQGISNISSSDEESDGFFQSLTPSPKQSRSLATTTGLV
IHASADGIAMGASASTSNTKLGFIIFIAIMVHKAPAAFGLTSVLLKQGLSKRAARGHLIV
FSLAAPFGAITTFLLVNILGGGNIEGAKGQWWTGMLLLFSGGTFLYVAMHAMQEDSGVHS
HEHTNSNGYLDGISQRKQAKPQMRDTLAAVGGMLIPLLTQFGHDH
>5af89a7e-46c4-4152-9fb8-320c26240ad6 (mRNA) 502 residues [BFAB_07:693938-696032 + strand] [peptide] name=Bfab07g01920.1
MAGIDSDWSSDSNEAIYISLVTPGAEGITSLHTFNPKFTYPIFGDEESIFGYQGLRINLK
YNACDMRPGLQITYNKKFKAVGDIEPTDLKATLEPFLPKTAFEKSSVFESHISATPADWH
PPGELFRAIEVGGEIFEIWKGNLSDPVIQQTIKRVQTLVPLFIEGGTLLDLDESEDDLGR
WTVFFLYHKKPAAASFFEKSSSYVFMGFCTVYRYFVYTPATPPQSPNGDKIAPEFTIPVD
GVSFNTLPCRSRISQFLILPPFQSGGKGSLFYNAVFDYLSSDPYTREITVEDPNEAFDDL
RDINDLGRLLKDERFLKLKLDSKVKINPKGPAPAKLFDTDAYEKLRIQSKIAPRQFARLH
EMYLLSIIPPSAKAAPLRDTGKPQKSLPPPRKEDEHMYYLWQLLVKQRLYRHNKDALAQF
DRGERIDKLNEALMGVEADYGRLIEIVEERIDREYSTVVGKGKGKSVANGNGKRAVSEED
DEDEDDEDENEEPLAKRLKFAS
>56676c61-f076-4303-a7cd-ca9b25121747 (mRNA) 301 residues [BFAB_07:696984-698516 + strand] [peptide] name=Bfab07g01930.1
MDPARPAPLRNSRLLNSIEEPTFRANLPDPIPTKPLKGKVKSAPTEMDPFEVRIRFTQYL
QHLNASVTSANKTAQYALKYRDMDEDLHSCILEQLEKNSMNNRANIMFFIEILCDMASRD
GHDDYVRMMQRDILRVVDAVAPEDGSGAANVKVVRKVLQGLQQKSFLLPQTVTEIEECLK
ERDTQPDALMSSPPANEANGNGTSQHATPKQAKPNGVARLDKRQIEQRIEEDRERHKRLR
EHIWAVPASGPNSEFDKLWDETSDLGDDDMDLYEEEAMERKEAGREWFNEQVHKSRLEGQ
S
>299a5841-1126-4a8f-bab1-487f64356146 (mRNA) 123 residues [BFAB_07:702810-703244 - strand] [peptide] name=Bfab07g01940.1
MSESSRHSLANNVDELVRDFKLLRQFKRDSSPKYRQAEKDLDDMMKTLDAQSKQDRETVE
RLWLRIPRLNAAKIQAHANDDLGLCNEIDIELGAIQIQVGELATGINSMERDITEISNLL
TEQ
>0b7066d9-bb6f-49a0-b48d-bf30ff4658d8 (mRNA) 126 residues [BFAB_07:704065-704498 - strand] [peptide] name=Bfab07g01950.1
MSTYHSPRHSLFREVDFMRGEMCRFRQLPLDHVDRQATYPTLRNNLQSLLISLRYENFIL
ENRISELQDEISRFSNGEGRMQVVGSNVAEGNIAEIIVLEGQQGTIDSDIDTVEDWVSEI
QLMEWT
>61e7dcb9-2779-429f-9ea5-42a19973e439 (mRNA) 1005 residues [BFAB_07:707347-711842 - strand] [peptide] name=Bfab07g01960.1
MDQLVLKPRAPVEDDVENWDDDDLDIGGDDFTFRSASAATTATIASTRRESVSSRLSIRS
DYNEERQVHLPEDDERAMNDAIATAKRAGIPLPENVPSSALLGGSIKRLGGRKLRKVISD
DWDDGDIEVPVGEALKIKQQDGSQFPETLRQVSGSGSLSPQKTLMAAPIFHVSPRPELKT
KAASSNMLDRYRDEEDDEFFGDGEATIKVAKKRNPQSMAPSIKSPTPEKCKETEEDFEHD
LQLPSDGDLKLTTRKDIPKTPQSIQDDFDDWGEGSLGTRFGGTKRDGRSNRNSDSFAMSP
SIASSMTAESEDEGLEGLVLPSGPLNFEDILKRRQLNDWPERPVEVKQPRKSLGGKDDFL
TGLEIGDGDVFDSKKLTLNRNVKVNPAKQQSPTRPKPSVSLTFTNKPALPSTSRLPRPHG
HERIPSSLEPVSESGGPIPSRNRRSQSRLGHSTHSSINNIGLSNAPSSNQPIPPSTPRRR
ELGTKLSTSTLRNEPTTTSSQLLKLKRSMPTMKTYQPSPAKPMPTRYERPPSRTEINNRP
LSMSRSKEPVEKDRSGAESSMSFVRKNHVPFLPAGGPSSSQSHHVTAKPTRHLRRNDSES
SINSADFRPPSRTLSRQTFRSPSPRRSLRGADMLAREATLKRQITKPVRRRHFGDGCELD
AFDDLPTSRDAEQKFIKEPIGRGPPKQLSLRNRAHQHIMPIRSSAPVPLTPLTPLTPAKS
RSELPRFARDTAASRMAREATSSNRTVSGSGAPLAALTNQWRAKVSATTGLSPVHAQGSV
RSKKNKVPQKPQLIKPMGNINNPRSVKGMQYDPVNYRWEGNEIEVSAFDMPASATPTISI
PVQTPRATAPQIYREKECSTPRPALITNINSAQNVQVVGGMVFDPQRMCWLKMPGENKRA
KSESGDTMDGFDALEDEDDVFKDVPDLEEGPSKESDEVSGLKGEGAAGLSDWLVGEEFDV
GPEFVRRQREEEDRWRRKCEKWIGAARNTEGNSWRWSIRDVVNEL
>d4f8a271-c686-4dd3-8c24-5778ccf8e18d (mRNA) 372 residues [BFAB_07:712415-714711 + strand] [peptide] name=Bfab07g01970.1
MAAKQLPAVLRITSSATNQDEGFLMHVESAGSRPLDLKLVGTDGELVFAVSVKHSKLSSL
KSKNSPCSDEEWILILSSMLLHEPPTEGNENVTRGVEIHAKVEKKAVTLVIQKVIEGIKQ
RLGAIKLDESEEEEIGLFEWCALAARAAESAKDELETLRTKYREQQKMLDGFNETFREVN
KTKSDYEIQLLEKFSLLQNEKKLKIRDQQTLLASAKVDPEKFDTVRATRSGKLRTAGASR
TGKRKAGKEVQAESSDSDDAFERMDIDKKQQEDDTADESDQQEIQTPDRSDEETEDEADD
SQPKPQRRKGKNIVQDDSDEGMRTAPKPTETTKIAELPAKRELPFAKKAAPVPAPKPADD
GSETESGSDDEL
>5096e574-a207-43bf-84b2-84acd8b20678 (mRNA) 233 residues [BFAB_07:717467-718565 - strand] [peptide] name=Bfab07g01980.1
MLEKYQLREARRDKERSLEDQQIYSRKFDLHQYFSPASRNTKRFIYYDKSTGISHVHDAN
EIAGDPKSLVVAVDGTCAQEGSGSESKSSYGIFFGEDSSFNMYDTIETSDRKQHTDDYAH
LMGIDRALDLIKNSPVLEKWRSTGEREGAFTTIIMTDSAYVYDNFTTSIWQWRKNGFESS
EGKQVVYGELIDKIDKAILDLAEDKILVRFWSVPREDNKEAEKLANRALEEEI
>6222e74e-e16a-43a6-a851-f910632a36bd (mRNA) 350 residues [BFAB_07:718986-720533 - strand] [peptide] name=Bfab07g01990.1
MSTLIKSAFKFSTRPLTKRSHNLPFSTTTARYIMNSETSAYQSSFGAEGNSGNAPKQIGQ
WQSLKLHDGTEVPMLGYGLGTARFKSNPDAGVDNKIVKTAVMAINAGYYHLDGAEVYGNE
TEMGMAIKESRVPREKFFITTKFFGTKILDTQAAFEESLKKLQLDYVDLYLIHSPYFAQT
PQDLQKKWADMEAIYASGRAKSIGVSNFLQKDIETILETAKIIPSINQIEYHPYLQHGSL
VPFLRERNIAVAAYAPLTAAVKASPGPLDDTYSILAKKYGVTPGEIALRWVIDQGIVALT
TSGNEDRLKGYQKIKQFKLTPKEVEDISRIGSEKHYRGFWKDKFAPDDRS
>54f78a0f-14a1-4a92-a888-1d5aca00f871 (mRNA) 642 residues [BFAB_07:720739-722919 + strand] [peptide] name=Bfab07g02000.1
MLSHFFSRLLVPRMRIAQMASHISQSSASKASSFAAKSLADLPKSWTFTSSLPPDPLFPT
PAASHQTARDEIGPRQVKGALFTWVRPEHSINPELLAVSPNAMKDLGIKEGEESTEDFKE
TVAGNKIWGWDEEKLEGGYPWAQCYGGWQFGSWAGQLGDGRAISLFETTNPSSNVRYELQ
LKGAGITPYSRFADGKAVLRSSIREFIVSEALNGLKIPTTRALSLTLLPFSKVRREITEP
GAIVARFAESWLRIGTFDILRARGDRALIRELCTYIAENVFQGWESLPGRNSADDGKAEN
IERGVSKDTIEGPAGFEENRFTRLYREIVQRNAKTVAAWQAYAFTNGVLNTDNTSIFGLS
IDFGPFAFLDNFDPSYTPNHDDHMLRYSYRNQPTIIWWNLVRLGESFGELIGAGAGVDSE
EFIEKGVREEAADELVSRAEALITRVGEEYKATFLAEYKRLMTARLGLKVFKESDFGTLY
SELLDTMESLELDFNQFFRKLSSIPISSLETSASRKEVSTQFFHHEGVTGLNNTMESATT
RLGDWLEKWQGRIYEDWGPDGDDENRMIEMKKVNPKFIPKGWVLDEIIKRVDKGGEREVL
NRVMKMVSDPFKESWDGDKEEEERWCGDVPRGDRAMQCSCSS
>1568ebfe-ab77-4c68-b9ab-d7ab0fab9724 (mRNA) 561 residues [BFAB_07:722947-725785 - strand] [peptide] name=Bfab07g02010.1
MSEFIGSRISLVSKSDIRYVGTLHEINSENATVALENVKSHGTEGRKNNPDEEIAASDNI
YEYIVFRGGDVKDLRIEEAPAPRESNPPQVPNDPAILGSGTRPAPTSAPVPPTPQNQNPR
GPPPQGQNAPQQQGPPPGMAPFGQYPPPGFYPPPPGGWGRGAPPGPGFPGMSPFGGPPGW
YPPPGHGFPQHPGQFAPPPGYGFPPPGQHFQQQNQQQKPSPIGPGANKQQTPTSANPTDK
PADAQAPDAGNTAAPAPKQATPPPSKTSPTEVDASTTKQSQPTAPPAARATPSGPRSGGR
VQPAIPLASPAVTKAPLQNTTAPAVPKQNDSSASLRDATQAATAAVAAAMAKLPPVGGQQ
TNGSAVDNLTRKVNEMRTTEPVRAPRQPGTNGFAARGRGRGGRAPGPAKVDVPAADFDFE
SANAKFNKQDLVKEAIAGSPLGEQPPNNASAPEVETEETAPKAYNKATSFFDNISSEAKD
RTEAAGNRAGGHQWRGEEQKKNVETFGQGSVDNGGYRGGYRGRGRGRGGYRGRGGYAGNG
QPTRGRGTGYRGRGDSQAVAQ
>696fcf18-2d2e-4043-af1d-389aa2d8a4e2 (mRNA) 205 residues [BFAB_07:726074-727898 + strand] [peptide] name=Bfab07g02020.1
MATETSDQSASSDINIYKDLASYSWDTDNEFQGGLSAILGNASSPDQIRELTLRAQCFYL
SRKKKIDINFDGYKAYLASHTSTSSSIDAPAPDSATSSKDTLSSNPPHPDHENDLPPATT
TADEMAPPPYPPSFAEIVALITTGATIPGIRDIPDTVLTDQGTKPVARKRRKPWEKDVDE
ETIQGGGTFGDHRDTIIQQEYPTDV
>a178a541-789f-4ed0-87ee-ce0be541c764 (mRNA) 170 residues [BFAB_07:728456-729549 + strand] [peptide] name=Bfab07g02030.1
MKVFLFISALVAFITATLAGTVPLESRQSIVGLWGKSTDIPVQYCYMDAACMQTRENWQF
CQVDLFKNVSEPIGNPNARNELVADCLCKAGMPDLTSECLACISLDSQNFLVQETLHTHA
LDVCAKKTTLSQYEIYAFQFGGAVQFPLILPSLWLNGTKVTSPDQILIEQ
>696cb677-4a6b-460e-ae27-8a6e295ca59b (mRNA) 436 residues [BFAB_07:729924-731573 - strand] [peptide] name=Bfab07g02040.1
MLRFIIDLQRKRLERISTAVADHAIVHGYQQASTEMEESHRNLLFFHKVKTISKNLFSKV
YSSPLNHNLGTDTTSADKVQSNGEVLHDDQSWEDDERTFNRFQDLPIELRLDILELYLQE
PRITTLNFVSSDLLQHDHMFGKRFRLTCGSLPPILCLNHEYRNMFLDRFTKPGITRSQTT
LSIEDALKLIDNEERNTALRDSFNDGSPSVFPIYSTRTQRNIIYDPEDVIWIQGDFWLDE
LRRSALARSTFHNLKYLAIPYKTRRKSLFELEDMLNFLSCIISTFANLKGLILVLEVEDV
VPERPIYNGEIHFYAPEKIRMVSSVPQDVSAKSRETLSSRWRKTLGKPVASPEVQLHTEY
WSARLLASDAWHILDYIKARAINAGNRGLSVTPWKDPSEVAKWEIPFIQVVTAGLSTSKG
ERDIVPTIRLENWIEE
>69297165-8178-46f4-bceb-9ff06cf6bbcb (mRNA) 391 residues [BFAB_07:733644-735056 - strand] [peptide] name=Bfab07g02050.1
MSSNEDQELSATKRDSISKRPDFLHSALNNLGLNYVQTRLVGMLGVEIFDSKTPKITDKK
RFNITVAGKSITVITNGGDFGLFEWFPTEIKLKIWEYALEAPRIISISSKAMKRNSFGII
PARFFYSGPQNSQLYVNHLARQQAIRRSNPLNEPRFSHDNSKSLLTTTYDAASDTIWIRD
IDFWTYRDRRGHWFGIHFNWMTRSLAITASSPEALMKWTSFHCLSYILAHFFSELKELIV
IMDYLDLTTPGVCDEITFINLTPKGFSEDRAMNKYLPKILSLSEEFIIGVISGEWKPDYW
YTSVCSMTQLLKSCFMRKQETTQAIPDPNKTISAEDVYWAFRNKKNTIERFNAQADEERR
KRTEVYRKWTVPSVKFLAATTYKQLKKTDRK
>4a4815c0-2f13-4eaf-8001-7286a1ad3f10 (mRNA) 474 residues [BFAB_07:736081-737760 + strand] [peptide] name=Bfab07g02060.1
MTDHAPGSHLCDDNEPREMKLQQNIENEVRGLIKKATKNATQKDLQGLRDGNSEIKARLS
PLDERILELIRKQGLYKLVAGGPFHGMTPSALDFIYKTIEDKDVSKNTELRKKLEKALSN
LQEEIFKEDKKATTLEKLPIFPLEIQKTIWNCVLLEPKVVRIGILPTERTTGEPEYLCGE
LCQTDKHTLMLLERNHILKSSPCPLLAVNKDSRRQALEVLGLFWEQKRPCEQADGGYVSF
NHIYVNWEIDTVWLDYNLAAAWRDNKVDPSDRLITPMPAYEKVRRLAIPAESIEWPCEKY
VSNIGVAIAGFTNLKHLAVLVPQKETAWSDPILVTTLPAKTFFNFLDNFGLESLGIGLED
FINEDRYGIDIEEFNMRELRDCVYGAFQHTLEEFNASDREDQIAGGHIRDLSTCEWPDVQ
YMELSTTKKEKVRAKAKALLDALPAGSCEIDEEDTNGRRRGVNLIRDVLIHSRS
>111d110c-241b-4e2a-8f71-d980dd6e0ebc (mRNA) 2248 residues [BFAB_07:738177-745632 - strand] [peptide] name=Bfab07g02070.1
MTRPHTSPRARSPVDRSPRRYLDSRDSDTYRGAARGGDRRRSPSSSRANTAAFNHNQNRE
LFSDRHTLSRDTNRDSSLRDPPRGPRAGSKSYIDPPSGPRGNSFGDGYRGDFGYRGDFRG
GRGRGRGRGSWRDESRDRDRERDRDRERGREIERDRDYRDIRRDNRGPLVPFRDDRSRDR
EWGSRDSFKGRRPSSPLGRGRSPNYNSRDIRDVPSSLELDRARRGSRDGPMSVTSPSSES
SQPFVHGYGRARGNGLARGRGRPYNYDEHYHRPQVRSRSPEPNFPRRTQPSATPPPQVPA
FGSTGASVSESPVPGVSVPTAPRFHAGRGAPGSLYVPAKSIVPQSIENPPLETRSDTQVG
ATPEHKFDELARVDKKRRQRKPLFGRRPPKISISDDYSDSDLDPFNDDDPEDEINFESEL
AEVRRSMNDARNRPDLPPLDHFFLVNSFRDLPLLLDTKEVPDTLIESIGSKSAADIPYTP
IEEENRSGPELESHSQPQQQPDVVLEPTKDILSADSKPLVSEDHQRPASPSLKSSIAVAT
IDSSQNEKQQWHSRQPRAPDPINPAIPSEESQSPATAVIEDTNSTADVITKDSIANETAS
VPAIHPTPLPIERSQSLFEGESRGPIKPTETNVDIPNSTVTKVDDVSSKDQFIEESFSKA
GVSEEASPKDDASKDTAPSVIQPATIELTDSQTPTTESSLLPRTDLENNASKNDTRDLPP
NLELQHAGANVSSSERPPSPLSSRIYSERILPPLDDKIIVETSMDTAPPVSDEASGLAAE
KDRKSETEPAYRFPLSLGPIDTEILPDAQAPEDDSLISPKTQGPIQRPMDKDADGDHQME
GTETYGNDESVNQEVINDIGNSGEDDRRIQKEQDEHYEFGPPKMPSPVPQAPELTMEIPE
ESDDDEDEAEQAGFQLLRQKLVQQEAALEEDRQSKILDAVKHPRDTKTPPPESLPIYDYN
KWDEDPEFLNSLEIAPDAEPSLTRFIEEKMAQKWRRQQEEGKLWADNYAKYRTFTDIDMD
PIAVRSREAFAKAQDREAEESVERGKSVNGSDPKTEGQRRTGSRFATEHDIERVLRESER
EAKESKEQQEQDAREETANSKEASIPDMCWDDEYKETMFVDTTHKVPFERSFRMLEFGES
IDNFTEEEALIFREKYSHSGKQFSVIAESLPHRDYKACIQHYYIIKTTDEWKAIFKKKNN
QVKTGRRKGAKKSSVLITNIENGGGNDTDATPDVENGNERRRPRRAAAPTWNFEAPPPTD
NEGASPAPTPAKRVATPKGEANGDSAPPKRKVKVPREKVPKQPKGSQLLAAAPSPAARNE
ESPNPPPSTAAPEPTPIRPPVAPARFPPYDSIVPQQIPSFSPPFMTPERPTPANLEVPIA
PERVGSAPPTTVETQPDRRSAAQQQTSSYWSVPEVHDFPELLRHFGTDWQGIAKHMGTKT
HTMVKNYYQRSVDSGSKKEWETITRDADSKREKGESTGPAPTPSAPTKRRYDPTPAPLSR
SASAMDLDELSANQPITLSQTSPPQPTLSTRFPALAQAGPVPQSMNQTITPSSLPSKRSH
HQANQHSLTQIPQQQQPISASPSTAASQLQPQPQPIQSQQVRQPRGPAMGFFTTDNQRPT
LQSNLSQQSQTASPISDPITLASQRSARVAEEAHRERQKALEHEVERMSQEQQQAIKRLA
LQDQARREQQAIREQAVREQAIREREQALREQTHREQQQQAYQRREQIREMEAIERQQQR
ERESKQEQLERNLKRKQERDHEQREQREQQDRKEKREQRNFQLKQEEIDVRNPQQYELYP
AHSSRTGSMAPTRPEVPYPAVTATEVRRQAPSLAPNQQYPRNQGVRNLLSDGMSVAPNLI
PSPSPAFGRSGISTPPIQEQYSTPPPPPAAVAAIRQQDTPRKTSNIMSLLNDESSEPSRA
PPVAQVQPKRVGGAVAIPIQNSRTPPPQRSLQTSRFSSHSSQQSQQISQQIQQNQQMQQA
QHQISSQTNPQHGYSQSSSQPMHQHSSSVGRSYTPTSYEGRSHAPPQTVQHHQMYSQPPR
QTIGSQSSSIRREPLHEINAPSGYTRSPITKLNESPYSATPPPASQQMARQTMSSPHDLP
QASDRDIYNRQSQFAVPQQSNTPVDFHSAPQVAASHRSMAFGQSGQSGHRTPPAPRGQWI
QGHQVGHHVHNSRQNSFDARNYNAAPSTSVSGQQGYAQAPSHHMQYQQQQNQERFDHHYE
RERERERQEREREQQYYRSRDDQRDPRR
>03cda27e-3284-4654-99be-37a0a0b45e95 (mRNA) 373 residues [BFAB_07:746255-747653 + strand] [peptide] name=Bfab07g02080.1
MASTSNSDGAPPSSVMDAVLVPSNEMPVNAQKVEELDFNKLAGRPITVDDLLSGMNNMGF
QASSIGEAVRIINDMRAWRGPEPSDRTTIFLGYTSNLISSGLRGTLRYLAQHRHISAIVT
TAGGVEEDIIKCLGPTYMGSFSTPGAELRAKGQNRIGNLIVPNNNYCAFEDWVMPILDTM
LAEQEESKKDPDTDNHIHWTPSKVIRRLGKEINNEDSLLYWAYKNDIPIFCPALTDGSLG
DMLYFHTFKSSPAQLRVDLVEDIRKINTMAVRAKRAGMIILGGGVVKHHIANACLMRNGA
ESAVYINTAQEFDGSDAGARPDEAVSWGKIKVGADSVKVYVEATACFPLIVAGTFAKDQE
KSVSQATSNSSEN
>dfb8d112-dd74-4e1d-9eda-e93193ddaec9 (mRNA) 219 residues [BFAB_07:748696-749690 - strand] [peptide] name=Bfab07g02090.1
MEPGNERRVTQKVPEDDVIKGVELLFFMKAKPVSDADAIFIESLRQQGGSPISDEQLETG
SCQDTISWRGSPTPEDLPMSPLKSDSPWDSRDTKPTHEATPQPVEHGPAKRQRGAKGTGR
IPAASAVKAARHQKKNDTRKRRAATPGPPMTAEQKRAAKEARDAADRMHLQRSFKKRDRG
EVGLALNAIGAPLPGAGIPAELSINERKSRSSKLIPKQE
>7cf847fe-9875-4db5-b232-2c2e47d70f12 (mRNA) 630 residues [BFAB_07:763702-767370 + strand] [peptide] name=Bfab07g02100.1
MMSQQYSEMFQDYPPNRSPASSRGAYGNMTLNRQSSRQFMDNYQAPLQNGAGLYASEDAS
QYNGNQAGYRGPSSNVNYAYESQTWNYGGANGAGTMGTAGRMRPQQQQARRAEIPSGWMN
PGTPSLGGPITQSSLQQHNLSGMFEQPQHAHRSPPPPNQQSDHEELIPTAIVIKNIPFAV
KKEQLTEMMSNMGLPLPYAFNYHFDNGVFRGLAFANFTDARETQQVIDALNHMDLQGRKL
RVEYKKMLPAAERDRIERDKRERRGQLEEQHRAPNVISTGSLHTAGSMTSMNSGLRTTSP
SPVNMRQNVAATNGTAAEYDLNDPTTLNYYTELLFFKQDAEREVLTFAPTVSPADRRIIH
TLAHNMGLDHHSQGHGELRQVQIVKPKLASPPLNQIQAGYYNESQRRGLNRAATIDFSEQ
RANDAAYQMHTLGRQGSGLLDIPGSPGVRDLLSGDRNLRTAKSFADLRSYTPSPVPSSAS
FPANMTQNIARFQGNDYGLGSVTGGTPNLTPTSAGPLGLRDDAFLANGMSNMSLAYDRQP
RSNAPGRIGQERDSYTPNAGPIGSQRPVNGSLEDSSSRNGSSAVPERQPRGPTSDQWGSG
FSRNRQNGHGSKSSDDSSERNGFTSASRFM
>e5b733e8-e0b7-440d-8a24-113d09665e79 (mRNA) 544 residues [BFAB_07:767869-770058 + strand] [peptide] name=Bfab07g02110.1
MSSLYNLEPQPTASCILHTTSGDISLELWAQQIPLASRNFLQHCLDGYYDNTVFHRLVPG
FILQGGDPTGTGSGGESIYDGGAFSEENGVWPMEERKGQNAGSRGVGFKDEFHSRIKYNR
RGLLGMANEGKDTNGSQFFLTLGDTPELMGKNTLFGRVEGETIYNLARMGEAECGEGERP
LYPTKITGVEVLVNPFKDMVRRERVAKIAVPEKKAPEKKKKRKAGKQLLSFGDDGEEGVE
QPVVKKKAKFDTRVVMDDGTADNEPEPEPKAKSASKKKAPKARSSESPQSSPEPEARARP
KPLPNRAAKLERDISSSPEPQVEKVASLLDRTNAQIAELKASMKRNVQTAPEPEKKKSAL
EAMIPATSVRGRKRNATGKSNASNDQASLDILRAFREKLETAPPEKEVAKPVSHDEAESK
HEENGTNDDEEAALCDLHFIANCQSCQSWEAQGEEEEEEDFNDKGWMSHALSFKEDKLGK
DLSYRKKAEEELVVIDPREKAKSLREEMKAKRDAKAGGSTGREWDIKRNEKLARGSALAG
RGAK
>495e83a9-21cd-4934-bfc8-de598238e5b5 (mRNA) 751 residues [BFAB_07:771392-774789 + strand] [peptide] name=Bfab07g02120.1
MYSRHMSSTNPRKRAAPGASSTIQTPQMQQTYDAGIQLPSAEFLRWNQNSDSQNFADPTA
SNYMNMFGANAGPPQTTTGFDHSIAAQTHSTQLARRPNVNNNRQLVAPRTYDGPADAWGP
FDDSMMDLQNGHGVNGENDDIEALEEKAAIAKRDAQSKRKQIPPFVQKLSSFLDESKNTE
LIRWSDRGDSFVVLDEDEFAKTLIPELFKHNNYASFVRQLNMYGFHKRVGLSDNSMKASE
RKNKSPSEYYNPYFKRGHPNLLWLINKPKGGTNKIRKEGPRRGKAEEMGDGDSDDEARDI
EEFGQSNYTNNAATHRAISAAPEAGPLQRREIAVVQGQISDIQKQQNTISQAIARLRKDH
NQLYQQAMAFQNLHERHESSINAILTFLATVYNRSLDGQGAENITRMFQTGLNQQGPHQQ
QGNVVDIGDLGTPQQQQPAGSVSPAIRKTQKLLTAGPPERESSRVTEASTANSSPRNQYS
TPRSGTVEELFESPSDSTTTKTEPQRDMLNIIQNANSQSRPENNVMDFPDMLTHYENANG
NSPLTSEQRSNMLNIIASTSSAPGSNNALVSPAPQAPDLAQMAYTQAEIENLMGLQQQQS
DRIASLSANITPLSPSGSIPGVQGDSYFNGAESIDPHNSHLDLDKFFDSQAFYSGGSPGN
PSFNFDDFGNGVDGSGYGGGDSHFDVGMDGVNDGSVNGNGSNGNGASRIVETVASSESTS
PAEDGMGDGNGNSNGNSNVNDNASNKRRRKI
>eb3ddaa9-5f2e-4805-9013-fa1f79f84f06 (mRNA) 602 residues [BFAB_07:779788-782790 + strand] [peptide] name=Bfab07g02130.1
MVEVSTKQVIKKELPKRSRAFSTRAKTGCKTCKVRHVKCDEGRPGCRKCAATGRQCDGYA
HCTPSPNPKPSALSSSIVPKSSSRATHQLPTIVPDFLSPSLAVSDQEQHSFHFFHTQTAP
QLSGCFGSKFWDYFVLQASHREPAVRHAAIALGSLHERFELEDRFISKVRYDTEENSFAV
RQYVKAINCLVQPNMSKHTCKSANIALTTCILFICFETLRGHHNSALAHIDGGVKIFSEL
QVSKHSAPVSHDLPEDHIPVSIFRMLFGRLDTQASVLTSRARIIDGESGSSPNSIPDRFL
NIEQAREAMESIWTYSARNLLSCSMYNGVPLPLPTSQETKFQLLAHLENWNRAFESFSCI
STERGYVEIVSPMEMRARDLLRLHKTMTQILVTTSTTHSARFNESSELLWDDFQLEFEAM
VNWASEIIRTPSDIQIGGRKAASFTLDSEILQPLFLIATKCRHIRIRNKAILLLNQADRQ
EGLWNSLLTAKVAERIREIEESGLGEMVAIVPESNRLRNIDMKFEFEGYNGRRAWLGYRT
FSAYESGEWIQIHERNIPSETFQTPSGSGDSSFQVHDIQRMERSREHSFESAWRVSIKSE
SF
>add90964-355d-4427-9a6f-9b16fa45c9df (mRNA) 453 residues [BFAB_07:784711-786480 + strand] [peptide] name=Bfab07g02140.1
MMDRRPPYITVPSYSSLLKHGTSHPSPLSPLTPPRRLHQRSLLPSPPISPHLHKPSPPIP
YPWIWRCHICHSVYRLGVTRRCLEDGHYFCSMPTPPPSPQTASPVSPSPSTSSLSSLIPP
KKKKKRRRQPRGCRAEFDYTGWEHYNHWRRDVSLLKTESRSLNNPHFIPPLKIGKDCYRD
CDFPSECQTLHLRPAVTPKTRQKSEPELIFPISPISAEERQRIDDEREDQQLIFDIAATT
PPATRAHGEFHNSANLMPDILSPDLSVLVERERRKSLEAEKRGLEHEAQFIVSPLTSHTA
FGDINYSGSGSTSPKGKERENERQEPKDGLGVSYPPELDDLAGEEETEENEQGYVREFIR
VKKRKSIAKIEQLTGLRLSEVQYGKMVGEVVDGDSEGSMVGEGEGSTSRRASVEIESPPS
SPLKIFYTVEDSDDEDDLDEVTPWDEHRRKHIR
>7dff7984-760e-4b07-a1a3-2ff5b0d12acb (mRNA) 143 residues [BFAB_07:786495-787699 - strand] [peptide] name=Bfab07g02150.1
MAGGKGKSSGGKSSAGGKVGADGNKKQQSHSSKAGLQFPCGRVKRFLKNNTQNKMRVGAK
AAVYVTAVLEYLTAEVLELAGNAAKDLKVKRITPRHLQLAIRGDEELDTLIRATIAFGGV
LPHINRALLLKVEQKKKKTIESA
>8bca108b-dfcc-45d3-befb-697fa9a9be3d (mRNA) 379 residues [BFAB_07:789225-790723 - strand] [peptide] name=Bfab07g02160.1
MQQPLEFPNESLLNQNRTLSFHSLLNLASLSPLRTFLARAPISSISSSASSTSTPAPRIP
QIHPGEYETYKSVNKLLSTFNSRSIAKARRASAKAKAQLPQNEEEDTYRSIHCGDQNCCF
SSPYSFYRTRSSFSSSTTRSKNIRSQSRSISNPNLRLASLKGDEKSVSPPVSSSSLHPFR
RSLTITGSSKRSNSLFSGSPPPPGKTLRPLYEYPEPVGPRSSSWLNGKLGMKVERSKSVS
WARDIPDNCQRSDSQHYRPSSLSLLSWTAEDIELGLMKENRLVKEKLGREIAYEWDGAFG
WTQACKECGRERCVKCSGIVFEQVVAEGDTVTRKEGMFNICTPCVHGFCPGTKMWLIIRC
KRCGEVECPRGSEVCTMEG
>2a5051bc-6d1f-4b96-bc19-9c68ee4f39e3 (mRNA) 508 residues [BFAB_07:790787-792989 - strand] [peptide] name=Bfab07g02170.1
MPYYVLNLGFLPDRISFYGIIIPFLTIALMVNRYLVWSRLRHIPGPRFAPFSNLWKLKSV
LSGRMPEILNDVSETYGELARIGPNDLICSDPDVIRRMGTAKLGYRRSRFYQSFAFNPDQ
DSMLSTTDEKIHADLKMKTAAGYSGKEVENLEQSIDRQLNAFIDLIERKYLSTPTDFRPF
DFAKKIQYFALDAITDVAFGTPFGCLAQDHDMYGYIKTVERLLPAAVVAGVLPWLLTLSR
SFVLKPFLLTEKDKLGFGKMIHVAKDIVAKRFGESKEVQNDMLGSFVAHGLTQEEANSET
LLQIIAGTDTTATAIRAMLLHIAASPTCYAALQAAIDEGVENGKISSPVTDTETRALPYL
QAIIKEGLRKFPVIAGLLPKTVPEGGDIINGFVVPGGTDVSLSLITITHSKATFGPDAHI
FRPERWLEGDDNNKLRKMNLAVDLAFGSGKWSCSGKNIAMMEMGKVLVELFRRFDISLVN
PTNPWKSFSAGAYIQSDLFVRFTKRSHQ
>b434383c-5462-4c61-9d4f-a61abb9c2e40 (mRNA) 537 residues [BFAB_07:793250-795252 - strand] [peptide] name=Bfab07g02180.1
MFDLAPRPDEPIVISTTHKSYRLGKDRGLPPHLVGEQSNYLVELTDENDPANAKSWTFKR
KMRTAAVLGFDTLIASWGSSVYSAAVAPVAYEFGVSEVVSILGLTLYICGFATGPLFFGP
ISELYGRKKPITLACFVFTCFMFAAATAKDFQTLMLCRFFAGVFASCPLAVVGGAFADMF
GNETRGIAIAAFSALVFIGPFISPIVGAFITTSHLGWRWTEYITGIMGALAFILDILFLE
ETYAKTLLQSRAGKIRKETGNFAIHHISEEEIISFDDLVRKHLFLPFKLLFGEPIVFLIT
IYTAFIYGILYLFLEAYPIVFAEYRGIDPAVATLPYVGMIIGVLSGCGIVIAFEPRYNRK
LRENNGIPVPEERLVPMMVGACIFPCGLFWFAWTGNYPSINWAAPTVSGILTGAGIMTIF
LQALNYLIDSYLFVAASAIAANTFLRSFFGAGFPLFATAMFHNLGVQWAGSLLGFLAIAF
LPIPFLFYKYGERLRKMSRHAPTDFGVPKNQPVDEETGTAVTTAAPSIEEEKPEPVV
>47d68888-0f26-4a73-9055-182016b0b483 (mRNA) 175 residues [BFAB_07:795821-797212 - strand] [peptide] name=Bfab07g02190.1
MLFLNTSRIMPMIAGLLSLLLVTAPVVNATPIVSKAVDVKALDGTIEARDGGIVEARDGT
LARRGDICHHADDGYCTIAVTVTRASLNAGIDNDMVYLFDNSCRPIGGMFSGQNIDMASQ
LPYKIIGHMAFENKRLTAFPDFCYAGRCTTAYNGCWIHSDIGDFQWVNRCQFRCD
>2cb3319d-3550-4362-aecf-ef2a8ee5b9ef (mRNA) 481 residues [BFAB_07:801806-804317 - strand] [peptide] name=Bfab07g02210.1
MANHMYYELPADPIESTPRPLTSSQTQQQQQPPPPPPPPLLPPRNPLASSPDDNEESTIR
GVPGDDPSAIPLPLFTRRSNSNLLSQTSANSTHNTTPTPSNRPPAPTVESYETNSSDNPS
PLPRHRSDSNTHTGPALPPRRISQHNPNEVYYTRDSHRVIAYLIPLPKPIDVSDADFPQR
YLIYTPPAAHLLKPAEGIKEGKRHKGKRVWQREVKKAKTYDGKTMSLKGLHSKTTRGVVW
GINSIKNTDITFLNRVPRKEIEELHLIYPPTISYSPIDLRNQFLSQLTRTKARAKKHAAI
SSLLLLPTLLIDTFAAVIWPFGGLFEVDAVWTFTSVRGYLVSRSVTKRLSSQDTIHDHEQ
MRIQDRELYLRFHKSEQLKILERYVKELCHKQNPKRFASAGVPPTETEVLKAMGWEPDMR
GRVKSGERGGMPEGGMRDWDDERWQEREVKDDLLGVLGKGAKSWDGWCKKWEKNPKKAEK
K
>cf7b703b-5626-4074-8d40-47036e728026 (mRNA) 1525 residues [BFAB_07:806049-811536 + strand] [peptide] name=Bfab07g02220.1
MASASGHDHHDYFLERSENILDPQPQSISNHQQDVERPESSSSDDSLDPDTTLEPVLTNE
TAREPQFEPIRAGDREQLQKIASGFGGSQLGRSLTNGTAATHELEKQDTLYGVKLGDSTL
DPNSPDFDVYKWAKMMMRLVDENGVIQRRAGIVFKNLKVCGSGSAINVQKNVGSLLMAPL
RYKEFIGKGPEKTILNDFNGVLKSGEMLIVLGRPGSGCSTFLKSLMGELYGLDMKAQSEI
HYNGITQKQMLKQFRGEIVYNQEVDKHFPHLTVGETLEFAASVRTPQQRLVEGTTRSAWA
KHMTKVVMAIYGLSHTYNTKVGNDFVRGVSGGERKRVSIAEMALAGSPIASWDNATRGLD
AATALEFTKSLRMTANLSGSCHLVAIYQASQQIYDQFDKAIVLYEGRQIYYGPCDQAKQY
FEDMGWECPSRQTTGDFLTSITNPSERKARPGYENKVPRTPEEFEKYFKDSKIFQRMMSE
MKSHEEEFPMGGKTLEQFKASRKGMQADHLRPESPYTVSIVMQTKLCARRAVQRLWNDKT
STITTIVGQIAMALIIGSIYYNTPTNTASFFQKGGVLFYAVLLNALIAISEINTLYSQRP
IVEKQASYAFYHPFTEALAGVVVDIPVKFAIATCFNIILYFLSGLKREAGAFFVFFLFNF
VAILTMSQIYRSIAAATKTISQALAIAGVATLAIVIYTGFVIPRPLMHPWFKWISWINPV
AYAFEALFVNELHGTEFVCSTLVPTGPGYVQAGNNFVCAVAGSVVGATTVSGDDYLQAQF
QYSYSHIWRNLGFMFAFMIFFLAFYLLATEFNASTDSKAEVLVFRRGHVPTNLLAAEKAA
KNDEEAHAGNGSAVKEGNSDKQGDEVQALAPQTDIFTWKDVCYDIKIKNEPRRLLDNVSG
WVKPGTLTALMGVSGAGKTTLLDVLAQRVSMGVITGDMLVSGKPLDASFQRKTGYVQQQD
LHLETTTVREALRFSAMLRQPKTVSKKEKYDFVEEVIKMLNMEEFSEAVVGVPGEGLNVE
QRKLLTIGVELAAKPALLLFLDEPTSGLDSQSSWAIVSFLRKLADNGQAVLATIHQPSAI
LFQEFDRLLFLAKGGRTVYFGDIGHNSETLLNYFESHGAAKCGEDENPAEYMLTMVGAGA
QGKSTQDWHQVWKASDEAKVIQTEISRIQQEMGHQPSEDDSNSHGEFAMPFTVQLLEVMK
RVFQQYWRTPGYVYSKLVLGVASALFIGFSFFHADASQQGLQDVIFSIFMITTIFTTLVQ
QIMPRFILQRDLYEVRERPSKSYSWKAFIIANIAVEIPYQIILGIMVFASYFYPIYTKNG
IPPSGRQGLILLLIIQFFVFASTFAHMLISALPDAETAGNVATLMFSLTLTFNGVFQTPK
ALPGFWIFMYRVSPLTYLVSAISSTGLSGRQVICSDNELAVMQPPAGDTCGSYLQSYATA
AGGSIYNPEAMADCQYCSSSNADQFLSSVAISYTTRWRDYGIGFAYIFFNIFVAILLYYL
IRVRKSSGKSLKEKFGALGALFKQN
>8fcad73f-3289-41c8-bfc3-a14fe06431b9 (mRNA) 122 residues [BFAB_07:811806-812527 - strand] [peptide] name=Bfab07g02230.1
MDKGIHAEGVVSAEGGIISAEEEVFVEGELSAERLKDPTEMIQDQGTMTGSEESKRVEGE
NALSANTKKEVEILKRDTESLPRKMKLLEEQKREVDRTLLVAKKLSDYKMNQLEKISLMG
EH
>5f819721-6b07-44a4-a14b-e40fb3a50e91 (mRNA) 542 residues [BFAB_07:814525-816633 - strand] [peptide] name=Bfab07g02240.1
MTSSDSEIEMIGINENQTKSRRGTRWVSRRQPKIKTESRKSALDKLPLEIRRMIYKELLT
NPVLGTIEAIEAGTESGAEAIYGLNPAILRTCRRFYEEASEVLYDQTFIIKCDYNYRGGS
LFQRPVTSCPCPILRYRYNLEPPITRLEIPIKSSAMTQARSWKVLVDSYTVKVDHHQQFY
EFCRAICDARPKEVEIVMLKTGTGPSSIIEGRRLGSCRLWRPWKTLAPLTMLRNFGKLTI
RNEHAPYLHETDGYIPDTVVWNSHEPGKVLTRMLKNLAQSDRPVERIFPMRAKLVKLAQS
FERYLPFKIDMNFRTPLITNSNDGLRSHSEDTHDLIKRGYKRCLEYDVLNPNRSKDFNND
LEQSLAIARDNDLTMQNLEFKKNREDVVNELQLQYKRLVIASNDLKAFKSGREELLERRD
SAFAYWLVLIEAYAAEFERQKNLQTKAEFRRQKRRFDNLRATWPREIMLAKLDRMVEDQE
FGEFAKVAQEVENDMDKQLAGITVAWRDLFKADVYHERFCQYKFDVGALKRKRDFRDEDE
EQ
>2d95d2d4-ad0b-4f54-aa3a-0c226b67bbbc (mRNA) 272 residues [BFAB_07:820460-821615 - strand] [peptide] name=Bfab07g02250.1
MPDPITVSAAASVASALSNSIAIASFVKDIKNTPADVKTCFSLTERVSTDLDHLILLRAQ
HHKYLSRSPFASKRLEGIVNDVRESILDICRLLEGCRKEVYEGGHIPVKKRLQWVLGDGA
AFERRRGNLQQQHTALLAEIGWLRGLEVGKGTENLEFENVDLLSAGRRERKSSTVSRTEK
QYEDIEVRQPNKGVEVDVEELDFGGDVEPDSPVTKEKIVRKPVAMPIGSRQEVSKYEESD
DEDPELAFYRDLRRQEEERRKRMAGRKKLRNP
>c706d282-40c0-4ec9-af0d-393ce9352864 (mRNA) 421 residues [BFAB_07:821829-823600 - strand] [peptide] name=Bfab07g02260.1
MSDSSTSSPNTSGAGLAPGTSSAASSTTQTTTSETSSLGISSKTSSTTFSTASSTTSSNP
SDAGLASGTSSIASSTAKSTTLAASSSSTSTALPTHTGHHGSSVSSGAVAGIAIATFIVG
ALLSAICVWFYLRRKRASKTPWSSENGYSKKNATTDHGVVISKSPATQMQNYLVAERADD
SQLRHQMQNLGELIYQHVENHYTTGPHTGSSQDFTATLKKCGYSERTDPTISTLGSLLGN
SSERQTAIKNLIAWVILRGVELNRASEYSLLPDEITTSYHSALKDNKQLNKQDAAYDNLL
SRVRQLSTQHISSSKSLEGASKNPSIARVVNLLNSILQPFIKPSSKSSQSENLASIVYQG
REFGLLLLAQPGNWIFGWEATPGVEPNTRNQIVVFPSLEEVINRDGKERRRVVSEQERET
V
>10591628-657c-4217-8585-c0589e8dac6c (mRNA) 632 residues [BFAB_07:824436-827103 + strand] [peptide] name=Bfab07g02270.1
MAPFNENAPDIIVGIDFGQTYTGVVWSNLSNTNPTKSIQEWPGLPPDSVETKVPTTIAYS
RNSNGRQETVWGFSCDPDDEYHEFTKVHEHFKIYLDQHSLDLARKGGVRDMPETVDEAKY
LVTDYLNQIYKHVKICIEAITGSWKDKRIEFVFSLPTTWDALDTVNRFNEAINAAGFTSQ
NPDKHSAKLELTEAEAAAVYFVTNSEIELEKGDIILICDAGGGTTDLGLVEVADPNPERP
ALKQVAEVKGVGIGSTMIDRAFERLVQNRLDEYPDIELPDNLAHKLARGSSFQSIKHNFG
TTSGNHAVYILRLDKLGIGIDKDLTHPGLRIEKGRMQFSRFEIQSLFDVQIAGIIRKIDK
QLDWMQTHRSHDDVKFLVLSGGLGGSQYVKTKIEEYFHRNPRQIAHRIRILKSQEPRLSV
VKGLVIDRRQRIKVGSATLKTRVARASYGVLCRQEYNPAIHVGETIITDPYNKKQKWATM
QIDWIIKKDDTIETDSARDRLFTRKIIPGDNNRTWDTTIVISHEDRHNLPTSFRHSNVSK
LCTVHSDLKEVDEEEFEPKNRKLWQRKKYYLATFTVRVIIAPADLRFELWFKGMKYNRSH
EPLSIDWDPAGASLRPRSADRPVDGWESRVQL
>43c3e8fc-8ff6-4f67-b60a-292f4f42f862 (mRNA) 249 residues [BFAB_07:827167-828325 - strand] [peptide] name=Bfab07g02280.1
MKYSIAIAALAASSAVAAPTTKLNAKQRLAQRNKNAARSEEYTKSWAGAVLTGAVYTGVS
ASFPIPKPAIGTTGETSASDFTASTWIGIDGYNCNNLWQAGVDATIEKSTGEISYYAWYE
WYPADTQVIDLGTLTAEDVISVNLTTSGLNQGTVVMENKSTGKSYTKTVSSANTLCGVSA
EWIMEDLSVDSSTIGLANYGSVVFSDAVATTASKTVTPSGAEILDIETSSNIILTKSSVT
AKSVTIAYV
>157a1602-9233-4178-b194-cfc7b3653673 (mRNA) 289 residues [BFAB_07:828897-830136 + strand] [peptide] name=Bfab07g02290.1
MTSSSASSSSPPPDPDDYLFQSHYQPNPTHPNSSQPLTPRPRSRPSSSSSSESPSPPPLQ
HNFFAPPFYNRPPTPLPPSPSLTSLLRPSRPTTPDSSADELEPPVPRASPKVPTYEYYGF
VLYLFSSLTFLLYLLWSYLPSPFLHALGIYYYPNRWWSLALPSWIVMLLVYIYVALASYN
TGYLTLGMSNVETIIDGAANVCLVDGRGMAGASHATQEENAREKDRRRGKERERGTGYTG
GGKEADVRAWKKVWSRGTDAVMDVPLGGVCEILYGDGREDLEMDDDDYY
>3d5de85e-cab1-49b4-b6d4-7a9a5b419eed (mRNA) 822 residues [BFAB_07:830224-833824 - strand] [peptide] name=Bfab07g02300.1
MAWQSLSGMGGGGGQNNGGGNVGDGGNQANQPQGTEYTLQGVMRFLQTEWHRHERERNAW
EIERQEMKSRIAKLEGNTRKLEGSNESLKKFLTMLERVAKDREAQLKAIKSGGTAPVPAN
KETKDKESRSTQREAHNSFLAVDGEPDAKKALQAEKGNMKDFMDKSQGELTYLLVAPPNP
MPPREAPPPPEEILPFGVSQAQHQNLEEMQQRYAGSKVMRVPELSRAPPAPSPTPNHNPP
PVPSPNKHSVQNPDNSAPRFLTDQLPLPQPSQQEWSSTFRSPEKAQPAEEPITKVNHSYD
SYGRPVATEEATEKSGSSDTDGWDFNEPTQTAEQENKIATQRPDTDVFPSAQDIPKSPIR
GPGSHRRKPSMSRRKSGEHELSLNPTQRPDSGSFKVRFGLRGHLDAVRSVIFTGGGSPGE
PELCTAGDDGTIKRWIIPARYEDQGTFHVSANDLDIQSYFTHRGHAGAVMCLTAWSPSQN
FASGGRAQGDGWIFSGGQDATVRVWERGRVDPKATLDGHTDAVWAVCVLPGTTGSIFGQT
NAFGGPDRIILASGAADGSVKVWSVSAPPQLVSPSGGGNRRGGRVRGNSMSSGSAFPSSP
QPSVASTSPFHYTLIHSITRPNSTASPTCITPLATSGESFAVSYSDAAVLVYDTRTGEEV
ASMASLETSNGTQSTGVNAIVATTTGLDSSLSSDSNRGMSEDENVVSGATGRSGGVEGII
ISGHEDRFIRFYDANSGQCTYNMLAHPAAISALSLSPDGRELVSAGHDASLRFWSLETRS
CTQEMTSHRLMRGEGVCSVVWSQDGRWIVSGGGDGVVKVFAR
>70b8bf16-9774-4544-abd2-061af146287f (mRNA) 374 residues [BFAB_07:834460-836008 - strand] [peptide] name=Bfab07g02310.1
MERSNTPPPARRTRSQVTSPPTPDVKRRIEENRLKAKALREQSIAREKAYSINDTNRTPS
GFIATPDITLAGQKRTHASISTSSVPATSRDARQTTKDARADDSSLQAARKFRKYVDHDF
SKMTDTKGGFLAVEDDPWNKALHTSKEGEKPAHMTLKEWERHQLLKGLRNRKEGPFEPGL
SVLGGDNKKCRECKSLEIDFVWDEVFKCRVCNGCKEKFPEKYSLLTKTEAKEDYLITDPE
LKDGELLPHLNKPNPHKSHWHDMMLFLRYQVEEYAFKTKWGSAEALDAEFEKREAEKKKR
KEEKFKSKLKELKKKTRTEAYRRGLAGDGKGGKFGDAISNGKHEHEWGQTVENEDGMSVK
SCIECGMEVEELEF
>011f685f-5330-456c-95aa-7d0090d7372d (mRNA) 192 residues [BFAB_07:836174-837278 - strand] [peptide] name=Bfab07g02320.1
MALSPQVTNLIIILGMMQVSKRVPLEDPNVLNIVRGIYILSNVIIAGVYAYTQFLINKKK
DMTTLKYVEQPQMGSAEEPKLVTTTVHKYDSDQMKALYKAQLMGVGMMAVMHLYFKYTNP
LMIQSIIPLKGAFEGNMVKIHLFGQPATGDLKRPFKAPAGLMSSLQGGASPTQDKKSIEA
AEKAGRGGVKDE
>ca28e17f-e24b-466d-a075-c29b4a8e9d8c (mRNA) 344 residues [BFAB_07:837600-838896 - strand] [peptide] name=Bfab07g02330.1
MDNRQTFNIINPDRGSHKLYYERGDSCSIWRKCLQYRPRVKDLKVLNPYRAKILQMPRFL
RKLRCRNPGGIPSKQASSLSDTRKSSQDPITSVKGAGTSSAGDQLLAPNPLLPTQLSPKI
LDSAPQKVCVEASKCEIILGEPATGKILSPEYNANYNPHRPYTPSNSNPNHEIGMALTTT
QTILNYSSSQQAIRNDNVQKRSNREDHGSVRSNGRSSWGILQIGEETKGTGLVDISTLIS
PYPQPKRKLVAHKIPVDEVEQHPLPQSASTKNLVQLLEIEASWQEQEQEKEEMEKITHHT
VNSRKPRTPRDSRRCGQVWNSEETRKSFLAIEALDTLALGSRLT
>0d6aef8d-9ad5-41aa-afed-4429e441c6db (mRNA) 123 residues [BFAB_07:842783-843654 + strand] [peptide] name=Bfab07g02345.1
MVHELTFHMERKNWIPRISMTRSPISMESLYNCSPRKNCGMFRLTASIICYLLCEAQGAI
YPKYWPTEDIDAFLTSHDDLRHEVFKMIRAQRNEMAFEEQVFYPGCRVHEHEEGQPCSQG
TAR
>7c9b003e-c9ea-4f18-b1d3-b7cc88916824 (mRNA) 307 residues [BFAB_07:843881-845583 + strand] [peptide] name=Bfab07g02350.1
MPSLEKALPQPKIELYSGKYFAACGLGGIIACGPTHTAVTPLDLVKCRRQVDSKLYTSNL
NAWSKIYRAEGLRGVFFGWSPTFVGYCFQGGGKYGFYEVFKYLYGEKLFPHANQTAIFLG
ASASAEFLADMALCPFEAIKVRMQTTLPPFANSLREGMSKVIKEEGYGGLYKGLYPLWGR
QIPYTMVKFATFETTVNKIYAYLGKPKSSYSGLQQTGVSFLGGYIAGIGCAVISHPADVM
VSKLNSDRKAGEGAGKAMTRIYGNIGFGGLWNGLPVRIVMIGTLTAFQWLVYDSFKVALG
LPTTGGH
>d242d040-e9e9-4ff4-a6ae-a60549e1b4e4 (mRNA) 452 residues [BFAB_07:849319-851213 + strand] [peptide] name=Bfab07g02360.1
MVRSTSIIAAMLSPVSQAIGIILFMAAILSAVNQGTGSTLFRYFNPPGHLWNSSRASFTK
EELLSYQGRRQSWAILLFLFAFSMSFMPFVLRIWDGRRNKTEHEVTLQAETKEDTKAKTK
TTKLTTSIKSSKVTKAESETSEAKEARSTKIEPSEKLTQGDQYDNFSTLFKMHVEIAKTK
SALESEQERVNRMELVMESLQSQIDVLQAKSTVKDGGAKNRAQAIEEDRQRQTDILTTRI
MTQEAKMEEVLERLEENDRSHDAIDVCIEKFTNEAVKTKEELKRFDCLDNKINEVEDLLV
DEISNLEEAAKDNLEEFRADILSLENYLAGGFQNLEDKKHSRESEIRKDIKNGVKEELRR
EQEKRELDEFWEERLKNVGSNMEEVAINEEVQDEMKEEVINTVPTVDRSSQTEAETTETG
INQEIVGTKGGDKKRETDPLAEIETKETKSKQ
>ce31c343-a3b6-4731-acf3-b30cd900e557 (mRNA) 284 residues [BFAB_07:852141-853464 - strand] [peptide] name=Bfab07g02370.1
MSTPEIPIIKVLFTLHAGMDALDFIGPLEVLSRAQHDVNDPKSKAFDCKFVAAEEFTISN
QGAAFRAHFNYKDAYATLSQYDILIVPGGGSDQVLKNKAEPLGLVRAFSDLQKKHPEKER
TLLSICTGSLFLAQQGILHGLSATTHPDYFAKFENINSEAAQRDLAERCDVVEERYVVNN
LRFDIDSPEESQYVRRKSDARRPSNARKGSNAWKESNIRRESNARRASLRLGGLRVITTG
AITCGLDASLYLVSVMVNEETAGEIAKFMEYEWKKGIVVDGIDI
>b20bc1f9-c3d1-41d4-8872-f2d6b5045c27 (mRNA) 205 residues [BFAB_07:859615-860406 + strand] [peptide] name=Bfab07g02400.1
MGIFDKKKVEHKESLGAAQAIKISRPIKAENSMMFHEESNTSNPTQQHARNPDAPLNDTG
YSSTPDHSTGHGHPNRAPQDPSRSVPNNPHQASQASSYPVDHQQPAMNHNPATNNPRPIR
SSATGRPRGQNHTRPTRRNAGNSSSSRLSSAHSGASSANGPLDDTEVTSQRGSRASSGSR
HSSPPSSSDENPFKYDDGRYASVLK
>dcfd9371-a8a3-41ef-8f2b-aa8fb98f6e09 (mRNA) 126 residues [BFAB_07:861487-862293 + strand] [peptide] name=Bfab07g02405.1
MEDPATAQWNIRISSSDLIKLKAGYEAPDMNHRWEITPKEADENGIIYIHISRSWTGEDH
FILSIKQSAEDGAEITSITWDQIVGEYRRDEEFAKKEVVMVCRMMVNCEFEALPIYDPRV
LWSLRR
>5a8258ce-a852-4534-a676-26f8daa4bf27 (mRNA) 556 residues [BFAB_07:877281-881354 + strand] [peptide] name=Bfab07g02410.1
MESSPIAAMQPSSFMPAWARNDMYASHPHAHMSNVTANSFGPGAFDFRDLSMKHSAKADY
FLVKPVRGSSPTASLAADLSQNFHIDMSPQLPTPRRSLFTSNLFGTLDGRDCATTPPLPS
SSPGPLNERMDISPLPHKQPYFSAQIEMASPTPAGTPVEDTAMGSSPIRSNSLDASKPFG
AERRKNGLLRPSLSRTKGFSTTALPRQNADSQLPPFRFGAGSSKLSTSTSMSLSECFMES
PPRERPERPSAGMMGPPPRLSRPFSSVSSRVVNGSPIGSHSRRTSNPLVRPRKQFRRSLS
MFESPQDIVKEKGAAPSNLETVMDIDEIHQPILPHFFQEGQPDSIPRIAKETLLEILDGK
YDDEYDQRMIVDCRFEYEFEGGHIDGAVNYNDKELLTSQLFEENIPGKTLLIFHCEYSAH
RAPIMARHVRQQDRTTNVEQYPKLSYPEVYILDGGYSAFFTEHQGRCFPQNYVEMDAKEH
AYTCEREMGRLRQNRTKLSRAHTYAIGQHGQIDDSPTAPSRSKSSGSMLTTEMTSSPMMS
SPIFYDRGTPRRQVSY
>44d46e29-6ad0-4b73-b6ec-17e72dc9114e (mRNA) 554 residues [BFAB_07:884955-887813 - strand] [peptide] name=Bfab07g02420.1
MLEAQEHGHTRMAGSEETLYGSNKSHTYSVERVPTGSTHKSNVSSYKFEDPSNLSDIALV
NYPKTDVGLNDIPAHTKPSDALAPETDLNAGIIGWDGQDDPDNPQNFPPSRKWLLLGLIS
SITVVSPLASSMVAPGVPYIEETFNNHNETLSTFTVTVFLLGIVFGPLFLSPLSEIYGRR
PVLCASNIVFCLFQIGCALAPNLTALIIFRFFAGIGGSGCLALGGGVIADLFRREQRGAA
SAAYTIGPLFGPVIGPICGGFIAERVGWHWIFWAIFCAGTVTTIGIEIFNRETYPPVLIR
RKTQKLRLELNRPDLLSCYDLGGDPSTRTVLLNGLLRPLKMLFMSPIVFILSIYICFAYS
LLYLLFTTITPVFQEQYGWSVGLCGLAYIGIGIGFFSGLALVTKISDRTVIRMTAANNGI
FEPEMRLPACLFFSLFIPITFFWYGWSAEKHAHWIIPVIGLIPFGFGMMGVFIPIQTYII
DSFPLFAASATAAMTASRSLFGAVLPLAAPSIYAKLGLGWGNTMLGFIAVAMIPATGLIY
KYGGQIRKRYPLNL
>b45eab1f-70ea-4a21-8d3a-325a667a0649 (mRNA) 340 residues [BFAB_07:888132-889750 + strand] [peptide] name=Bfab07g02430.1
MAKKSKNSIPNPPRSISDDSSHDDGAPIYTPPETESNDGPSTSAHVPDANHLHDVVTGLQ
NINLAQDKAGQLEQESDKDISTSTRKKRGLRIRLSGKKLVPADIAASNVTVSLQNLAVSD
KDTSNLELEKIDQKAAKSRMRKERRRKARQAEEEEKTQSEQSNYKWFKNAGWKDMKDFMI
GHGFKWGDVDDYAAASELIKRLKEDQGSEEHAEPEPPKKEVIKDASVKAKIAKTKKNTVA
GLWADYFGNETQLANWQRLCVDVGMEEIPTSITKCRKALGKVWVNIYDFLDAKAEGKPIK
KYSSERELAKYTMKSGKIYPKAKAKEGGPARALLAHIFGH
>5b12edc6-46c5-45f4-9042-cf29b3618d5c (mRNA) 588 residues [BFAB_07:890900-892944 - strand] [peptide] name=Bfab07g02450.1
MPPLRSKKSANGSAKSKKDARAIPQESEESASDNESVNMMDKDSDEEELDRLVLGDGAGF
TAQLGQDMDFESEDNEEGEKGQDEEREDIGIEGVDDADLFFLDSGPSTVPQDALIPHPQS
EDEEGGDALAWEDSDDDRLNVSLAGNSRLRKLRVNEGEDIVSGKEYTRRLRMQFERLNPV
PEWAQSSRPTKRRRRSSAASDSSLSSNDMDVDDSDLSTLPLARLLQDAGALTKEAPATSK
RPKLRPEVLDIQRTRDIPKTQPSAVTSLSFHPEYPVILSSGPSSTLYLHHYAPTAHPQPH
PQLTSVHVRKTPIATSAFLHPSGDKIIFAGRRRYFHIWDLPSGEINKVTRIYGHKDDQKT
MERFKLSPCGRYMGLIGSSKKGGGLINILDATTTQWIASARIEGKNGVADFAWWRNGEGL
TVVGKGGEVGEWSMETGSFVARWNDDGSIGATVLTLGGPNGPKQLGGDRWVVIGSQSGVV
NIYDRKNFISGNDIKIPERPEPNRRLLQLTTPTSHLKISPDGQLLVFSSRWKKDALRLVH
LPSCTVYKNWPTSNTPLGRISSVAFGSGSNVLAVGNEAGKIKLWEIRS
>02c96858-7bbf-4231-9f31-c1f5ae2e4e43 (mRNA) 368 residues [BFAB_07:894037-895379 + strand] [peptide] name=Bfab07g02460.1
MAGILTSEEMAERASARQYLERPWRNLDFCVYRFIPPTDKRGLPYAEINIDGRPRGLNAN
KVWVGDFAPRWGEFLLDLGEPVYDIQNHHPLVTRLEGYGLDQGRVKNRNLQQLPFPWGID
GSLPVQIWANERFRDNHRLPFDPKGMSRLDLQWEARRRGLPTKGKRSEIIQRINRLELAK
GIQAPDFYQREALQRLDACQIPLFRVLEPQEPVKSTPQTPLKQPPFDTGEIVLVYGTLTG
DDTTCLVRDYEGNRGHISFDYLEEIPLPFGLKLNRRELVEVLDRLGWADEVDKTPEPEEG
SDEWKALVEQRRAEAEKAGAEEKWHDYDTRWKEGQKRKKRADDAKKAERRAKRAKLAAAA
AAAEGAET
>04aba4aa-5a14-4e3c-9d64-1f825cb603a3 (mRNA) 833 residues [BFAB_07:895467-898348 - strand] [peptide] name=Bfab07g02470.1
MHPTKLPQRRATHASTYPMPPPGLPNGSLTPLPTTPSPESAQSSIHNASSLASIQNILST
LHTRDAAITTSLQSLISSQASLSRDLGRLDLLRAHLGTNVIHTRAISNGMLDNAAGTAEK
LSSKVKELDLEKKRVEETLGVVEKVAELKACVNGVVGSMGAPQDWEAAAGYIARASKIPA
HIVEGNFAARTVPSVEVPDAPGVTIEEAKKSLCGLFLREFEKAAEEGDGVRVTRFFKLFP
LIGREEVGLDVYGKYVCQGVAGTARNNLKEGTKGERGKEGFFYAQALTRLFEHIAQIVEG
HGGLVERHYGAGKMVRVIERLQAEADVQGGIVLDTWGDEKNVDRRLTDVRSYPFSFLVQS
FLPNQRPTGISRTGSPAVGAAANGRASEDEGVDMKEVDGLLNEMAVMLGRWSLYARFLSG
KCRDPEASPDEPLIMPELLDKSALSRKISNRLKDPFNVMTTFFFRRSVEKAFQLDESPTG
LSLNLSNPIDGNAPYIISAVDDVMYIVNTVLKRSISTSQRGVIESVIPAISRVLGTDFVG
MIQRKMRDESYPRPLVQGGFPPEDRIIAFIVLINSLVVSNDYISRIVSSHLQSSETNSAS
QAKGVPPAPALKDMFPYGHDDTFVSNSLTSLNATFSSKTNELISEGLQVMFNNVIKPRLR
PVLSETFRDVDYSLTSEDLAEIARQNDTDDDPQEILQDMVSRRFEHHWDALMKPIQRIMS
TTPFNTLLEQTAQYLARVLERRVWNYSGKMNALGATRMERDYGGIVGVIARGGKYGLRDV
FARVLQVAMVVNMDEEEWEAVNVEGGGVGEEEVEMVWVLTVDERTRARGMVRE
>2df95e44-dc1e-4f22-9c9e-5321dd8acfaf (mRNA) 1081 residues [BFAB_07:898440-902461 - strand] [peptide] name=Bfab07g02480.1
MSWPRPARPGSPSGALLPMVNLPAANGREPVSEPSSRPRSRDRANSKSKHTRSSSAMAKT
IADEFSGLTPAETAEQLQTSLTSGLTPAEALARLHDQGPNELPHEPPEPLWLRFIKQFKE
TLILLLLGSAVMSVIAGNKDDAISIAVAVTIVVTVGFVQEYRSEKSIEALNHLVPNHAHI
IRGEMRTTTPRTPAWPPSVRDRPEAEALMAGAGSDADSSMAEAVSQKTMASKLVPGDLVL
FTTGDRIPADIRVTKASDLTIDESNLTGENEPVRITAEARHVDLRPGSSSLEPPTPSDYA
SPASGTVGADISLNSTTNIAFMGTLVRSGHGQGIVYATGGNTHFGTIAASVSETESPRTP
LQLSMDDLGNHLSQASFVIIAVISLVGWLQGKAWLDIFTISISLAVAAIPEGLPIIVTVT
LALGVHRMARHNAIVRKMPSVETLGSVNVVCSDKTGTLTMNHMTTVKMWYFDADAPLDVD
SDDETVESKADTVALRILRIGNIANNARLTHLHAPSASSVAILSSTQGRASGQVLKSRWV
GQPTDVAMLDMLDRFREHDVREGLGHRIGETPFSSERKWMGVTIGDLGPEGTSSPKEHAY
IKGAIERVLERCDTYLTKDGREVHLDAEKRQQALQAAEKLASKGLRVLGFASGPVARHAK
SLVPTSRSATPVSKLEHHVSHNEDVYNGLTFAGLVGMSDPPRTGVSKSIRRLMRGGVKVI
MITGDAETTALAIAKKLGMPIAEPRAHSVNSVEVRPVLRGDEIDEMTDGELQAAIANTSV
FARTSPDHKMKIIRALQARGDIVAMTGDGVNDAPALKKADIGISMGLQGTDVAKEAADMI
LTDDDFSTILKAIEEGKGIFSNIQNFLTFQLSTSAAALSLVLVCTCLGFKNPLNAMQILW
INIIMDGPPAQSLGVEPVDPDVMNRPPRKRNAPVLTRALIARVLTSATIIMLGTMAVYTH
EMLSDGKVSKRDTTMTFTCFVLFDMFNALNCRSESKSVLRGEVGLFSNKLFNWAVSLSLG
GQILVIYFPWLQEVFQTEALALTDLVGLVILTSSVFWADEARKWWKSRSRSRLGSGYSQV
V
>7e9ff149-884c-4629-b70b-d9c4e11dd71d (mRNA) 662 residues [BFAB_07:902995-905687 + strand] [peptide] name=Bfab07g02490.1
MFYSETLLSKTGPLARVWLSANLERKLSKNHILQASVKDSVEAIVTPNQAPMALRLSGQL
LLGVVRIYSRKARYLLDDCNEALIKIKMAFRLSGNNDIPAGLHMPSRDALMLPDMLTEGD
NLEMPPMPDASFLFSQLDEESALGRKRRGASRDINLQDEFNNSQFLQNSVEDNNADEDEL
ALEPLDDDLDLGLDFGLDDINPKTTGADRSGADISLEFGRDAPAARAVEDDLLSELDIQP
RAKDVFDDGDRENSINLGFGNDDVGFHIGDDDGDIDMLNIGGEPDMSALPRAPELERLRI
SESPLSDIDETIVAEVEANQQQRDESGLFAPDDTEQSIFRQPAQRARKFKPLMPDDDTTI
SKHAIQELQKNHEAILRPQSFLPRDPQLLALMEMQKNGGFVSNIMGEGRSMGWAPELRGM
LSLDAVRRTGDLKRKRDGGVADLDNEQDPGANKSPRLDLGEEEDLGANLAGDAGLGRDDT
MIAADGTIIEMGGGDEFNINIDDDEHNATAGLRDARSASPGNQFDETTAPLVHPADNGPV
SLGTTHAVHLLRERFGDEAANSPDKRKKASVLFQDLLPEGTTSKADATKMFFEVLVLATK
DAVKVEQPENSLGGPIRVRGKRGLWGAWAEREAGGEIAEENAPGPSATAPLLEASRMVSV
SA
>2e9289b6-9738-41b8-995e-245420c135cf (mRNA) 384 residues [BFAB_07:905759-907636 - strand] [peptide] name=Bfab07g02500.1
MPMHNGWLPREGFRSDSLGSLIKKTALNPAFTLVFLILARYTKRGNDLSILHETAFSRIR
KLFYFGVVRLVSNYLERGVQNNWVDDVYDWKKEIVLITGGAGGIGGQVVKLLAEKEITVV
VLDVIPMTFEATSNVHYYKCDITSPSTLTTVASRIRSEVGNPTILINNAGVARGKSILDS
TEKDIRFTFDVNTISHYFTTQEFLPYMIDKNHGMVVTIASLAAYLPVPNMTDYASSKAAT
LSFHEGLTAELLTKYNAPKVRTIVINQGYTKTALFQGYKNDATFLLPTLEVDTVAEEIVK
KILKGKSGQGIYPGFGVSLTWLRAMPGWYQNRVRTQGENIMTNWKGRQVVDVDEFYEEKE
KDEKGKGKGRGFEGESESTVLVNP
>560e4693-28a8-4bb0-b3de-4e59f19c5e34 (mRNA) 245 residues [BFAB_07:907969-908971 - strand] [peptide] name=Bfab07g02510.1
MAALQSFILFICLCVQGISSQEIVNGQIYTPGIAIVDAPQPNTPLGGDFLQVALDVSSDG
QLQLPPYPKNAVSEIYNITMFLSSYTTGKNFTISNGTATAGNASLGEIMAQEPSSTVKHV
NWVWPDCLVGDGTSDKDTSRGAYNISIRQNFRLNGTDQYTIFDLPIQVTNSIPEKSDRPS
CDSINNDLIPWTTLNASANSFTRVAGTAIQTTGSSQDGIGAGSSIDWRTGVHYVWMGSLV
MMFAL
>d64e13aa-c9de-4e53-8a13-0a442db561d0 (mRNA) 821 residues [BFAB_07:909360-912601 + strand] [peptide] name=Bfab07g02520.1
MNSILRPTRGIRISSVSTSTLPPKCHHSNPYYQGRGSCQRRYQTPAFRAAERKLFKVSEE
VREATRSEKPVVALETTIYTHGYSYPDNVKLALDLEDIVRLNGGVPATIGILDGVARVGL
SKEELIAIASAAGKPETMKVSRRDLPYILGMGITGRKITGGTTIAGTMILARKAGISVFG
TGGLGGVHRGGHDSMDISADLTELGRTPVAVISSGCKSFLDIPRTLEYLETQGAGVFTFA
DGRTGSIDYPAFFTRDSGVKSPMIVQNAEEAAAIIYAQDFFKPASGFHFANPIPEEFSLP
KSEIDKAIDQAVQEAADQGFHGHSNTPFILARIKELTKGNSTAANRALIESNIKMATKVA
VELSRLRTDGSKRRENTSKVLTRPSSTANINKIDPNHSSLELSSSSVSSPKPSIIVVGSI
AVDLACDYTPRTTQSTGTSSPQMHTSNIAKIHSSIGGVGYNVLRAAQLSSKEPVSLYTFI
ADDQAGKSILQSLQSSGLNTDDITICSKETDYRTAQYVAINDGKKDLVIAMADMDIFARP
SNDPSIRTIHSKLGSLTSSTKWVIIDANWKSEVIQEFLNATKSSSSSVKIAYEPVSTIKS
ARLFERPTSSSLKANKLPVFPNNIVDLATPNEHELTSMHDAATSHGKFETDEWWQTIDAL
GIPSTGARDRFVHMTSRELTDQGIPVKAVQLLPYIPTILTKLGSQGVLLTSILSPSDPRL
RDPDHAPYILSRCTNGNEEVGGVYMRLFPVVEKVEEGDVVSVNGVGDTFMGVLISGLARG
CELGDGLIDIAQKGAVMTLKSSESVSPEVRELREKLNELSQ
>36e0aad5-ae26-48f8-a0ef-a87691b5f1d1 (mRNA) 419 residues [BFAB_07:919993-922449 + strand] [peptide] name=Bfab07g02530.1
MDLSREDEYFEWLDRTDVVDLAPRIIRQPEISALKVICMDDADEDEFEFPRYDDIQWSNA
HEDHVPKEEYDAQVDYYLQSPSLQPTYLEDDVSLCSTPPTLSPSDQSPASELSELPESTE
PCDITETVDDLGVRVKPSHHVDYLAHDWPEEDLWASWKFIQSHRTAYENSKRLENASWRG
WAKKRSNLKTIDPSTFGWEKDHDTTWLYGPLHQQEPSKSLFSSQMDLDCRPKLTRSLSYA
DVSVKPILKQRGICDVLLKRSSSAGLESMESSLPSLSSGRSSPTSTSSRKCVRFNDEVEQ
YIAVNNSYEGVTDYTMGKSTVEGNSSASMAHSSSKSNMRIVAKLPNSTLKNTVEVDNISA
VAYSLQQSLIQDHFVLPRFEYEEYASAANGDDDEWELSMMGMDFKTSTTSISVGGGGVY
>a136e426-6f2e-4c4d-81c1-b3b3d0c4b02b (mRNA) 629 residues [BFAB_07:923913-926950 - strand] [peptide] name=Bfab07g02540.1
MPRLQTKNDQLNLLRMQLEEEQKSCASLRHTIKAKQATIESTLAQLKDAKESLIQATSTS
PFMKKLPVELRLKIYKLLLVNPKLSEADTIGKAAEYGKCVKFELTPAILRTCKAIHDEAE
PILYGSNTFIIECIGGYGPVGSLHVPQSPLTRFTDPSFDNFEDTDSEDDFERNMMGYSGT
EIPFDFSTFGALKKVKRWRILAGAYRPTTTNPVPAKSFVHFCQALCEEAPTQPQRSLEIV
LALARVSIVISPTRAEDTQYKFSQDQLDYLLQPLRLLRDIHLELNIAQFKTDLPQSTHLC
GMGPEYYFPYSEAQTVEVNLERSMNLALPIVQKYQAIVEDLSPVEKVFKMYRRLERYVVS
FERSGQFARDLITLQKGHEGSRRETRHFGWQLPGASFGNPFKSRSPSSYHPVELAFSKAI
VAKDKEDVTEFKAARASVLKELDPQYRRMVEASRKLTDFVEKERLSGVFHKCTGCSVFHQ
YEEDPYESSLGEDLDRYIYELDKIASLLNRSMPDHIQIQIQKGTTMYEAAYFHLERERLF
RKLRWMQKQDILVKNPSQIAKWTKRLIEDMWGDCQGISWHRECLFKDDITDIGCKINKKL
GQGLMEQELEWLEGFESDEEEFHELRYGD
>81ce4610-c0fc-4dba-a8eb-ca80d477c815 (mRNA) 691 residues [BFAB_07:927059-930721 - strand] [peptide] name=Bfab07g02550.2
MSVPGIAQTSRRHDTGYLPIENYGLIGNMRTCALVGIDGSIDFMCWPDFDSPSIFGRLLD
KDKGGHFSISPAMGVTFNTKQQYLPSSNILQTRYIHEEGVVDLIDFFPRPNHSHVAKKSS
MPFRETTKVQGELKKWLVRRVECIRGSVDLGERDPEHGGNHHISQLCLDVEIFPAFNYAR
DEHDLEILMPEHPPGALESKTVTFSSKDLKLQLDVTIDHGEENIESCPSLIFRRVRQKES
KGDGVVANIRLQEGQAISFVLRDDIPDHITRDVTTEVLDAQQHDTQRYWSNWIGQSKYTG
RWREVVARSLMILKLLTYEPTGAIIAAPTFSIPEDIGGVRNWDYRYSWVRDSSFTIYILL
RMGFVDEADAYMNFISDRFRLSRGPDGALPIMFTIRGETDIPELELSHLSGYRDSGPVRI
GNGAAFHQQFDIYGELMDAIYLWNKYGKPVTWDQWVAVREILDYVLKIWQDTDMSIWEVR
SKKQNYTYSKVMLWVAFDRGVRLSEKRCLPCPNKTEWLRVRDTIYEEIMQKGYNTEMQMF
VQSYESRTMLDASILIAPLVFFISPNDPRFLHTIDKILLSPEKGGLTETGLVFRYNTSTS
EDGVGGREGAFSMCTFWLVEALTRAGVYDRKYLVKAVNILENMLSFGNHLSMFSEEIARS
GEQLGNTPQAFSHLALISAAFNLDRATKGKN
>1a9f3f47-f7a6-4e38-966c-482237d1951f (mRNA) 673 residues [BFAB_07:927059-930721 - strand] [peptide] name=Bfab07g02550.1
MSVPGIAQTSRRHDTGYLPIENYGLIGNMRTCALVGIDGSIDFMCWPDFDSPSIFGRLLD
KDKGGHFSISPAMGVTFNTKQQYLPSSNILQTRYIHEEGVVDLIDFFPRPNHSHVAKKSS
MPFRETTKVQGELKKWLVRRVECIRGSVDLDVEIFPAFNYARDEHDLEILMPEHPPGALE
SKTVTFSSKDLKLQLDVTIDHGEENIESCPSLIFRRVRQKESKGDGVVANIRLQEGQAIS
FVLRDDIPDHITRDVTTEVLDAQQHDTQRYWSNWIGQSKYTGRWREVVARSLMILKLLTY
EPTGAIIAAPTFSIPEDIGGVRNWDYRYSWVRDSSFTIYILLRMGFVDEADAYMNFISDR
FRLSRGPDGALPIMFTIRGETDIPELELSHLSGYRDSGPVRIGNGAAFHQQFDIYGELMD
AIYLWNKYGKPVTWDQWVAVREILDYVLKIWQDTDMSIWEVRSKKQNYTYSKVMLWVAFD
RGVRLSEKRCLPCPNKTEWLRVRDTIYEEIMQKGYNTEMQMFVQSYESRTMLDASILIAP
LVFFISPNDPRFLHTIDKILLSPEKGGLTETGLVFRYNTSTSEDGVGGREGAFSMCTFWL
VEALTRAGVYDRKYLVKAVNILENMLSFGNHLSMFSEEIARSGEQLGNTPQAFSHLALIS
AAFNLDRATKGKN
>54c4ca6f-3c16-4525-a031-d752384c1fa6 (mRNA) 644 residues [BFAB_07:931724-934450 + strand] [peptide] name=Bfab07g02560.1
MALEGETRFENPAQHHSQFEGEEEVAAEEEFPNTLPSSDHISTTNTSLASSPSQSQSQSR
SNRPSQSHFPIQTLPRTSISEASARSEEELLEPDAATALADLHPIDSDMDSQPSGHRRRR
SSMMNNIDGSLRAPRAKRSPRTSTIGVDLKSGDRGSDDDSRSTSDDMELNHFSEEGDLQD
DEETGLTAKSKAKRKKKKIRHQSMDHRIAGEIKVTKDEQKEADWNVVRKSLMNGVLIGLW
YTFSLSISIYNKWMFDPKHLNFHFPLFTTCMHMLVQFSLASLVLYFLPQFRPRYDSISNP
HNTHVSDSDMAQHEVDSKKPLMTRMFYFTRIGPCGMATGLDIGLGNMSLKFITLTFYTMC
KSSALAFVLLFAFVFRLETPSWRLVGIIFTMTIGVVMMVFGEVDFSTKGFVLVIFAAFFS
GFRWGLTQILLLRNPATSNPFSSIFYLAPIMFVSLLVIAIPVEGFSGLWQGLKTLVEVKG
PVFGPLLLLFPGCIAFCMTASEFALLQRTSVVTLSIAGIFKEVVTISAAGLVFHDPLTPV
NISGLFVTIGAIAAYNWIKIRKMREDAQDEARRIHEATERARESGSDADGEDGESDWDGQ
EGSYVTSDGDVLPNPDRFQVKKGESSRAEHAPLVGGSSKKDLSD
>4c00931f-9a79-44c0-82bb-b22fb4e0d450 (mRNA) 604 residues [BFAB_07:934571-936818 - strand] [peptide] name=Bfab07g02570.1
MGDSTNASVGDPSVITIDNISSRMPPHDVDGAEKSTDHLYALVDMGSNGIRFSISDLSPP
TSRLLPCIYRDRAAISLYDALHSSLPGSREFYFDAETISRVAGCLAGFKKICDSYGVLRK
NIGVFATEAMRTAENREEMTRAIARESGLEVDILSPQVESLLGALGARSGFGGVEGVMMD
LGGGSVQMTFMDSADAGRGAGGPAEIGMEIEEERGGEGEIYWTKSATCAKSMPFGAAKMT
AKMKGDEIHDLRTDMRSRFQETFQGLCHRFPKLQRHVENEGVTIYFCGGGFRGYGSMLMH
TDSINPYPIPSIAGYTVSGKRFKQTKEMLRVNAEEKDKIHGMSKRRREQFPAIVEVVEGI
IATVPKIKEVIFCGGGNREGVLYLKLPPQIQETHPLLLFPSQLSTTPIQSTAVAKILSSA
LPNSQSGTEIFTPEILEYVGKHMGDNMADISNLNAARALHAPISGSIAGMPGLTHGVIAV
LALTMCARWENDVGKVDRGVLAGLRKVLGEEKAWWCEYMGAVARVVCGIVTVPRMGRGEV
GGLRFEGVWEEGLGKKGRKEGVCLKVFWEGRGRDVGLEKLVGKVGKGLGMKRRVEISWGE
EIVG
>dbb25213-2f93-4219-8414-9e16e772a9e9 (mRNA) 755 residues [BFAB_07:937001-940223 - strand] [peptide] name=Bfab07g02580.1
MQVMQDPSQGIHRDLLHHVHLLSTYRFPITPTQLHPERVAEWLLNGPKITRDQAPVYWTY
LDRPVDGTVLLSWQTPTMGQEFPSDGYVWAPGEAAFSLEVMGCTLEIYHCKIGYGTGEPI
ASHTRRRYRLLPPRIPNQNPSPDPNLWIIHYTQAPPEDRLPPHMIPINQQIQTIMSTRQY
LHQQGQLIHKEFLLHDRANWAKIDFPRGHPRGAPMYAASIPPRVPQTMAYPTHPQPGPPS
KRARTANVAQAAVANNAAAVVEEDEEENSRGDWFDLTTPREISYSRFLANYEWMEEVLSS
PYAVNQIVPTDLGLGLRGELSSLTEGIFNAPLKETEEPTLNYVGRLDPGKADEFRKRAHD
TIAQTNKDIEKMKAKHAKRLAKFQRGSLISQAEKELRTAVDDPSDIGPEYWRLEGKIDEE
ENEESETPIKIPSKVDDVLAKVEASLGRHAVAISELRRIQDGGYEEVTARASPPPSQPSR
NNSQQSGVLMNDTEIGDVGDVDMTNSTAGLLDQFHNSNPSSSHATPISANYPTPGHLQHP
SAATTPAGALHMASPHLSQTMGTPQITQQSQSPSQQEQNDVHMQDSTSTAETQQHMTTTA
PPTTGADTSDWVVVPPGGISPTADPSNNNTNNGTQNSENQNQNQQSTLSDFGKPSSDNNA
LEQPNISTSLPEPQQELQEHQVEQEEQEHHTELNENDFDLEDLDTAGDALASYDAGDNME
DGHGLGDLVDDSAFGDAFHGVDHHNDNVDEDNHGM
>f0a37fff-1fac-4ef5-9c76-1644291f26af (mRNA) 243 residues [BFAB_07:940343-941522 - strand] [peptide] name=Bfab07g02585.1
MLSFQLNPIAPSTPTKMDGSIVHKTLKGRVTKNTKKTVTSPKKQVSSPDEMMSSSASTPA
TSPNQLAHYPLSKRQAALLRGIKTSLTKSCNPVERGEPKEDQMDLDKKIKYPIKTNTSSG
TKAKKPGKSEKPVFNSKFAKETSFGGVVKNKKEAKSVLIPNFSKCSRSPPAISTERLLLR
PNGKGFVALGREVVKFGVGNVLRSLESDVMDTVSIHSCVPFKLLVVSFVCVSDLLPPPLF
ETN
>a83e9ecc-a5a0-4b4c-adcb-d8a79a4fce3e (mRNA) 546 residues [BFAB_07:942402-944695 - strand] [peptide] name=Bfab07g02590.1
MAKTEWVACTALAAILVYVFPHCFIVDRISRSAIRFLLVDISLFSFWRMFIYPFFFSPLR
HLPGPVSYNFLWGNGTAQFTKPPGQKIQEFVRDVPNDGLLRIRSFGNIERLVPTSPQVLK
TILADNSYDYEKPHGVRKFLSLILGEGPILSEGSLHKFQRKHLLPAFQVKHIRGLYPVFW
SKALGLVEGISQEISETSTLEKRNESHIEFNEWATRVTLDIIGVAGVGRDFGALRNPDDP
LVRDYNELLEPTLSKGLYFAANIFGPQDLIQKLPFKYSKVIAETTGNLRTFCREVIDEKR
QAVSEGKTIDGMDILSILVRSNDFSNKDLEDQLLTFLAAGHETTSSALTWAIYLLAIHPD
WQAKLRQEIHAAIPSPSDPNSSQPDHTIIDSLPILNAVMQETLRLYPTVPISVRKTTRPT
SITLPNSAPLSIPLGTRMLISPLAINRSPLLWGPKADEWSPERWLQDGCANTGGAESNFA
NMTFFHGERSCIGKGFAISEFKCLLAGTVGGLEWEMWDKEERVKVGGVVTTKPVGGMNVR
MKVVGW
>4f38e4f8-ba1e-4713-87f6-dedbc4c8ae27 (mRNA) 377 residues [BFAB_07:944912-946547 - strand] [peptide] name=Bfab07g02600.1
MSYPPPPGIKSTPSPHPSLPARPPPSTNPQAGFKPAFSNNNNNNGPSRPPASGGYGGFAG
FAPRSVAAPVQPSHQGFQQPPTAYQQPQPYNPYSGAPQQEAAYGAAPQIRNPFAPPTASA
GRGVGGYDEDPEMAAQIAQWQSAYAGKDANASSTSNNGYTGAVRKYPTPGESSTSASNAN
ATPLGRTETGPSMTSQAITNAAHNDTGVAAIVSDSKTNQKTVVRTGGGSQWTDSSLLEWD
PSHFRLFVGNLAGEVTDESLHKAFSRWTSLQKARVIRDKRTTKSKGYGFVSFSDGDDFFQ
AARDMQGKYIGSHPVLLRRSTTEIKAVTPKDNKHGKNNKNKGKGGNRNDGGQGNKDRTGA
GIQKAGSKTKGGLKVLG
>2e10d106-81fc-456b-98a3-a1b187f77ea2 (mRNA) 245 residues [BFAB_07:944912-946547 - strand] [peptide] name=Bfab07g02600.2
MAAQIAQWQSAYAGKDANASSTSNNGYTGAVRKYPTPGESSTSASNANATPLGRTETGPS
MTSQAITNAAHNDTGVAAIVSDSKTNQKTVVRTGGGSQWTDSSLLEWDPSHFRLFVGNLA
GEVTDESLHKAFSRWTSLQKARVIRDKRTTKSKGYGFVSFSDGDDFFQAARDMQGKYIGS
HPVLLRRSTTEIKAVTPKDNKHGKNNKNKGKGGNRNDGGQGNKDRTGAGIQKAGSKTKGG
LKVLG
>e4fe6272-7703-4fe1-8ea2-70825e579013 (mRNA) 530 residues [BFAB_07:947512-949976 + strand] [peptide] name=Bfab07g02610.1
MNVNMRPGVPRNSNSGAGASEDKFNQRLIHLQNHLKMSAPQATGDFGLIGLAVMGQNIIL
NAADHGFNVIAFNRTTSKVDRFLENEAKGKSIEGAHSIEEFCAKLKKPRRIMLLVMAGKP
VDDFIETILPHIEEGDIIIDGGNSHFPDTNRRTKYLAEKGIRFVGSGVSGGEEGARYGPS
LMPGGNEEAWPYIKDVFQSIAAKSDGEACCEWVGDEGAGHYVKMVHNGIEYGDMQLICEA
YDIMKRGLGMQDKEIGDVFAEWNKGVLDSFLIEITRDIMYFNDDDGTPLLEKIMDSAGQK
GTGKWTAINALDLGMPVTLIAESVLSRCLSSLKEERTRASKVLSYVGRSNKFEGDKKQFL
EDLEQALYASKIISYAQGFMLMQEAAKEFKWKLNKPSIALMWRGGCIIRSVFLKDITAAY
RADDNLENLLFSDFFNKAIHKAQPGWRDVVSKSALMGIPTPAFSTALSWFDGYRTKDLPA
NLLQAQRDYFGAHTFKIKPEHASEKYPVGKDIHVNWTGRGGNVSASTYQA
>0ab502c7-2f8c-4716-962e-c4ffadde8b08 (mRNA) 199 residues [BFAB_07:951457-952291 + strand] [peptide] name=Bfab07g02620.1
MLETLESDRRISIEEARKIRAKWTATVKHNPIYANYHIEVKYYWVEKLMWLDLFKGHLFP
GIKPKPTAHAATTPIAGTATDRCSESTGGNKASKAASAAEGRHLNNTPKTYPRLASNSNA
STTGQPSAQGKVNKLQVKSHAIPSPSEITETVSTLSSMDSLARQNNMRDYMGNSEDVELQ
QGCGQGSENLPGTNAVSTS
>4ed51076-b1fe-40b3-96c8-004dc17fa4c2 (mRNA) 522 residues [BFAB_07:954668-957121 + strand] [peptide] name=Bfab07g02640.1
MATSPTSSNPFSPPGQTASSGSAGQFDIDNTLFVSKDVSLSLSPESLVIKGAETANKPEK
GAKSAGARRSVTLDAPAYSEPVGSSNLRAIPLRQILWAEITETELIINYAKEISKIVLQP
AVLKYVIEEERDRVEAWVSRLKDRAYGKSQQQKRVKVIINPKSGRGQSEKIYAKDVAPIL
DAAHLSIDVTVTKASREATDIVEKLDIEAYDVIICCSGDGLPFEVFNGLGKRKDAMKALS
KMAIAHIPCGSGNGLHCSLHGNIRSTSIAALSIVKGIRTPLDLISVTQGEERHLSFLSQA
LGIVAEFDLGTEHLRWMGGTRFVYGFVMKSLQKKIFPCDIAVKVVTDDKEDIKRRYRDAM
EVGSTSEELLRENSSLEGGLPELKYGNSSDPLPEGWEVEQHDNLGSFYCGNMSWMGADVD
YFPAALPNDGCMDMVTIDYSKLSRLQALQLLPAVESGKFFGLPYVNYRKVEAYRITPKNQ
SDGYISIDGERVPFGPFQAEVHRGLGTVLSVSGYRYETLGPK
>1bad1886-176c-4fb9-aec5-f1b572e4dae1 (mRNA) 422 residues [BFAB_07:957596-959292 + strand] [peptide] name=Bfab07g02650.1
MYFSKILLLISPLLLSINASPIEERASWPYAPFTTSGRWILDSAGHNVSYAGANWPGAAD
TMIPEGLQYQSIASIVTKIKSLGMNVIRLTYAIEMIDDFHANGQVDTSILTSFTKALGTT
NGTAVFNQVVKNNPTFTSKTTRLQVFDAIAAECFKQQIYVHLDNHVSKAIWCCSNTDGNS
WFGDTYFNVSNWQRGIAYMATRGASWGNLMSMALRNELREPTSNPSLDSSSYNWENWYTN
VVAGMNSIHTANPNVLIFISGLNFDTDLSTIPNAGLLTPSTTQKFLKSSFSYANKLVLEL
HNYASSTSSCSSLQSSLKSQGYNALNAGVTNQMPVVLTEWGHAQTAADYATVYSTCLKTY
LTSIKGGWMVWVLSGSYYIRSGTQDFEETWGLLTHDWSAWRDPTDVANVIVPMVSGTKIY
SP
>cc8a84ca-92c6-44d7-bfed-984dfcda1a63 (mRNA) 114 residues [BFAB_07:960892-962064 - strand] [peptide] name=Bfab07g02660.1
MMPQLPSFLPPPPPPPAASSPDTFSVTLLESLTKFALGLMNFAPASGKNGRGRKESFIKD
ASNAKVKDRTQSPKAQTKTITYREGSSLRISNVKLADRMTFPDPKWVIDRRKAT
>16a3449f-ae09-414a-baa0-29d943e4c2d3 (mRNA) 643 residues [BFAB_07:962477-966172 - strand] [peptide] name=Bfab07g02670.1
MILHSTLVSALAVVSLLPWLSFSAPTVSRAASPKYVFAHFMVGIVENYQLLDWKMDMAHA
QEIGIDGFALNCASIDSYTPTQLALAYQAAEETGFHVFISFDFAYWNNGNTNNITDYMNQ
YASHPGQMQYNGGAVVSTFVGDYFDWAPVKAGTNHSIFAIPMMQDPIEASYLTTSFDGAF
SWLAWPTDGGNSIIPGPMSTSWDDKFLTYLKGKPYMAPVSPWFSTHFNSKNWVFISEELI
TDRWNQMLAMQPALIEIISWNDFGESHYISPPEPNHKDDGSSQWADGFPHDGWRVISKPY
IAAYKAGASTPTVTEDQLVYWYRPTPKGITCTNDTLGPPNGREMLADDIFVTTLLTEPAT
LVVTSGDKTPVSIDVPAGIVTTNFTMGVGNQYFMVTRKGSPVLNGYGGLNIVDKCEKYNF
NAYVGSLNGTSNDGPPPPATTTSTSTFITTTSASTSSTSTSITTTSTTSVPPISTTSSSS
STTSPTSTTTSTTFTTSIIPTSTTTSSSTSTSSTSTSSTSTSSTSTSSTSTSSTSTSSTS
TSSTSTSSTSTSSTSSLPEPSPSTVCTSGWGPGNYIGLCQFTCNYGYCPPGPCTCLSYGS
QIPAPPITNQAGYPLPGEDDSYLGLCSYSCNHGYCPPTACRLG
>a9c21987-6c40-427d-b783-341695caf020 (mRNA) 111 residues [BFAB_07:966407-967221 + strand] [peptide] name=Bfab07g02680.1
MAPPSQLAIATSSVARLVKEEASYHKELISQQARLKKLEEATEEDENREYSLKQERAAIE
ETKAVFPPLRERLGDAILKLEDLVQRGGDEAEEQKANEVIAKAKEAIAAAN
>a8e06f5b-2dc1-447b-a779-4c3693494cbe (mRNA) 377 residues [BFAB_07:967120-968483 - strand] [peptide] name=Bfab07g02690.1
MASYQLLDQREEDELHKSRLLNVEEKPFKRITKRLLTPGFVTTPSKLPTPPLDTNEEIGE
ADHQKILDERRQLREDVLLDFAAFDSSLARIQFLRNSNERERERYKADKEHILETAQAVR
DNTVQLRIQLEEAKTTLEQRKKFDELAEKITNNMLLRPRKDQEINLRKLEDECKELERES
RTYGETWKERREQFGRIVEEGMQLRRLIRDEKEEVERREGMDGGEEDGEVGDGDGDGPTP
QRRNSTSDDATPRQGSPERDTLKPKPLPSGSISRSGSRPGSRSGSRSGSRGRSTSRIASP
TRSERARSRKRRGEEGEGEDFAMTDVSARQVDMDNSADTPMADGMNSTQGGTPRVTINEP
EEGSIDEGEVGDKMDTT
>f696e9e6-9f88-40d1-aee8-4a5eeabd2313 (mRNA) 399 residues [BFAB_07:968533-970353 + strand] [peptide] name=Bfab07g02700.1
MEEHTGVKSLYSLCKATCLRNIKDLYDIGITSYQVAYPILKTITNPEQLHIIEQRSPHIK
GETAELWKAFIVRDIPKWQTKNYVPRDPTKWAQVYKKYKTEHDEEVASAQAILMNSMNAL
KQHKQDHVSRFVDLKRLPKIPRDYGMRAHNGGVPLTKGRALQNAGPSSLTWGGGSRTKIT
DGASVLTKARREAKEMSQRSKLNTLSSGLRHGQVQRAPAGMSQEYKIANQPALKILTRHR
PSGARSRDALGGPSSGPSLEDREKRLRDAMSGRKPGSSSSKEPMSGTSAGTPTLLDDDMF
GDDADDADDLFDEYKETEPAHKSATRPPPSRKIMKSVAPSTRIRSSSPPNKATSRPSAPS
SRTSSAPSSRPATPGATMPARRRPAPVDIFNRGPKKPRR
>2d4e6fa3-94ed-4216-b15b-e519aa61a066 (mRNA) 508 residues [BFAB_07:971826-975195 + strand] [peptide] name=Bfab07g02720.1
MPTLKFGQATSTIFNVSRTKYGEDKVYVHPHGSSSTASGWSPTGFLHPSGNLQRMEEEKL
IEEFQRKKIGEFTVRELVDFDVVSGRVLEEADLESIPIHPIFAVNKWEKLGQRQRDWALQ
TPEEMGDGHFIMDNPYVLNAMMPVLTLASAFLSRMHTVPFVDALFLGPRKPMDPSTSTLT
IPRGLYTFWRRDEETRTVNDSQECLEVVTSFLKYLHGKIKWGFASGYYMPWDEAPSKENC
HGVTFIAKDSDDKETIWIFLDLKLLDLLLRNDLTSAEKAGTQYSLAITMIHELTHAMGFN
FHHDPDLEGLYGYEPYFEDSPQCELGFEMENSVFGGIIEPVFKPPAAPLAYRMVSSYPSW
SHLKMRALETFVMDQAAKYNDLSYVYFVPIQTFEDIRKLSFWDTAIRQFGFSVIHARSIR
HGWAARYVAFWDLADHYNAPQAGLLKSGKIKDHEQKQAARIKELADVVAVYNSTQLSPLR
KAASKFVDDIMASASKEERFYDFTQEQE
>cbe0e919-cedd-42d3-be65-3ce941494691 (mRNA) 783 residues [BFAB_07:975424-978691 - strand] [peptide] name=Bfab07g02730.1
MIFFPSFWIILGLISSCLGQTYWYETIAHQGIAPYNPQGTAYQVFRNVKDFGATGNGVTD
DTAAINAAIAYGSRCVEGVPGVGCASATNSPAVVYFPAGTYLISSPILPYYMTQLIGNPN
ALPTIKATAGFVGIALIDADPYGSSIPDYGTTNVFYRQVRNFIIDTTSIPATSLARGIHW
PTSQATSLQNMVFNLNKASGTLHQGVFIENGSGGYMNDLIFNGGQYGMSVGSQQFTSRNL
TFNNCGTAIYQLWDWGWTYMGLSINNCAIGLDMSDGGSTAQQVGSVTVIDSTFSNTPIGI
LTARSSTSLPLTGGSLAIENVVFTNVPTAVEGANGASLAGSTGSITVAAWVQGNAYSPAG
PTSTQGATSAFPRPASLLSGTRYYTRSKPQYNTLAATQFASVRTAGAKGDGVTDDSAAIQ
AIITSATAAGKVIYFDSGIYKVTTTISIPAGARIVGETYPVIMGSGSFFANMAAPQPVVQ
IGSTSGETGIVEWSDMIVSTQGATAGATLIQWNLASPSTTPSGVWDVHTRIGGFDGSNLQ
VAQCPTTGIQPNTNCIAAFMSMQITNLASGLYMENVWLWTADHDIDDVIDTQISIYSGRG
LSVESTTGNFWLIGTAVEHHALYQYQFANTQNVFMGYIQTETPYYQPVPQATSPFPPITT
LNDPDFSTFCAGKSSTCYDAWGLRILDSKNILVYGAGFYSFFNDYSLTCSNHTTTTYNSN
CQTQIFGIDEGGSASESYSGSSVYVYGLNTLGVESMIDMDGNSVAAYTANANVYGANVVR
FVS
>dfebdebd-6de2-4784-bf8c-4b1b25b0b828 (mRNA) 373 residues [BFAB_07:979888-981188 - strand] [peptide] name=Bfab07g02740.1
MPQALYNVASSDVRKAIDSLIFQMVHIKDESGEFLLKLEDGRVIDTKGWQGWEWTHGVGL
YGLWKDHCLTGSPESLEIIEKWFQNRFDEGGTTKNINTVAAMLTLAYVYEEKRVNKFLPW
LENWAEWAMYELPRTKYGGMSHMTYNSTNAQELWDDTLMMTVLPLAKIGKVLNRPHYVEE
AKRQFLLHIKYLFDTKTGLFFHGWTFADGGHNFAKALWARGNSWLTIVIPEMLELLDLPP
NDSFRIHLIDTLEAQCQALVQYQEDDGLWRTLLDQPADAGSYVESSATAGFAYGILKALR
MRYIVGEEYQNCAIKAIKAVLGKVNDQGELLDVSFGTAMGHTLQHYIDIDRTSMPYGQAM
AIMALGEFSRVFI
>92b9c950-a382-4e0d-ae86-f17dd57c8a17 (mRNA) 705 residues [BFAB_07:984386-987161 - strand] [peptide] name=Bfab07g02750.1
MSALSLPRKLWEHPSPQSTAMYKLMQEINQKHHLQIDNFWDLWQYSTTHRAQFWDQAFQY
LNLIYSGSYTTVVDEGAPIDSIPRWFSGVYMNFAENILYSRVPGHASSQRSTIGKEDDKI
ALTEVREGGTEIRDISWGKLRKEVAELASAMKEHGVGMGDRVVVVASNSFDTLKVFLAVA
SLGGLFSSSSTDMGVQGVLQRALQVEPKYIFMDDWTVYNGKKVDLREKMVAIVHGMKDIK
EFRGMVSMPRFQTPSDTTGIPRTQSLSTYLSKSTSQTLTFAKTAFHDPFFIAYSSGTTGT
PKCIVHSIGGAVLSAAKEGILHLEAGPHCTVLQYTTTGWIMYFSSISNLLTGCRLVLYDG
SPFQPDLTTFVKLLGDLKVTHFGTSPRWMAEMQKNGIVPKDVTDLSSLHTVTSTGMVLAD
QIFEWFYDVGFPEKVHLANISGGTDIAGCFGQGNPLTPVYVGGTQGPSLGTPIAVYDALV
ESGQGVPVEHGTPGELVAPHAFPNIPAFFFRDPNGSLYHSSYFSKYTHVWTHGDFVSIHP
VTHSLHFHGRADGVLNPSGVRFGSAEIYSIIEKYFGKEVRESLCVGQKRERDEDERVMLF
LVMREGEKFNERLREKVKEIIGRELSKRHVPRWIFEAPDIPTTVNLKKVELPVKQIVSGK
IIKPSGTLLNPESLQFFYRFAKVEELVMGEEEGGKSREGKRESKL
>917f6b02-ad8d-43a3-af22-5d51848c3d07 (mRNA) 612 residues [BFAB_07:988517-991020 - strand] [peptide] name=Bfab07g02770.1
MEKFLRDWRQDAMNKHQYDSAIFIGDKLLAITKSDKDAFWLAQVHFSTGNYTRAQSFLTK
QDLIARNPSCRYLAGHCLIKQSRFEEALSILGEKNPTHLISTAGHNRKKLQHTRGHARNG
STTQSSRHRQDEIAKDEAANVKFEAAMCFLRGLCYAKQNAFDRAKECYKDAVRIDVQCFE
AFEQLMKNCLMSPEEEWQFLESLDFDTISVTDDTSSSQEAAEFTKMLYTTRLSKYKNPAA
FTTATETLSTHYNLATNPDLLLSKADLFFTQCRFKDALAITNSILEEDKYNFSIYPLHLA
CLYELQLKNALFLVSHDLADNHPEEPCTWLAVGIYYLAINKVAEARRYFSKASMMDPHFG
PAWIGFAHTFAAEGEHDQAISAYSTAARLFMGTHLPQLFLGMQNHMLNNMTLADEFLKTA
YELCKTDPLLLNEMGVVFYHQERLEDAVLILRKALEIAEEIDSDPQAWISTRSNLGHAYR
RLHQWDAALAEFDAVLRQGGKDPAIFCAKGLVLMEQRKPFEAVLMFHEALAISPQDAIAT
ELLNKALEETAIHGINGSRIFDDDEDEIERELSSRKDEVLASLRPSRMKGKGKSRSKVVV
NEANSMELSDGD
>f54a0c3f-22f6-455f-9ca8-25ffcf7fe66e (mRNA) 269 residues [BFAB_07:991165-992596 + strand] [peptide] name=Bfab07g02780.1
MSERKVLTKYYPPDFDPSKIVKSRAPKQVGPKVQTVRLMAPFPMKCTACGEYIYKGRKFN
ARKETTEEKYLAISIYRFYIKCTRCSGEITFKTDPKNMDYQCERGAKRNTEPWRVNGGGL
QESDEERLDRLEREEQERDAMQELEDKTAEAKTEMAVADALDEIRTRNARNERVGKDGTE
VTVTRENVDSERERQEREDEEAARRAFMRRQEAMEEIIEDDADDVGAGPAPKITKEEALT
MPPPSFRRVVKKKKDHGAALGIKKKPSLV
>71b2f988-7803-43dd-882b-f64485a32c75 (mRNA) 1043 residues [BFAB_07:992927-997059 + strand] [peptide] name=Bfab07g02790.1
MGSIQRQTPAYGQRLLPTLIDEKAVDEPNNIIYSYAKTTKAVDGFVEVSHKRFANSINRA
AWWIEKLLGKGENFPSVGYVGPGDLRYQILTLALVKAGYKILLNSPRNSIEGHLNVIKRA
ECNIWLLPSGSTGNIREVLKVHPMTVLDCPELDFFLDETPVPHYAYNKTWAEASQEPTLV
LHTSGSTGLPKPIVVRHALGAVMDAQKLVKCDNGEVLHSNMWKGAKSFSSFPSFHAAGVY
LNLFSACYFGIQIVLASPSVPVTSNLVDDMIENAGIDSLMLAPSTVEEVAFSSSSLELIQ
EKNIKFVSFGGGPVGQKAGDIITKITILQNMIGSTEASLFALIWTGRENWRYFKFHADNG
IRFDDRGDGLHEMLVVRDPKLEKVQGMFHTFPELNEISTNDLYSKHPTEPDMWLYRGRAD
DIIVFSNGEKLNPVTMEQTISEHELVRSAIIVGQARFQPAVMIELNDPVEVTENNKKDLI
SRIQPSIDAANKGSSSHGHIKDGFVMFAKPEKPFLRAGKGTVQRAATIKLYEPEIEELFA
NTEDGEDNSLDTSSLESLTSTLKYLVAKIASVDEVSVDEDVFANGSFDSLLVFTLLRQLR
SALKKDNIETEKLQASTIYKNPTVKSLASVVFKLAHPLENQEDSTKTDFDERQAMFEKYA
KDLPTKTFGTAAQGSNAKISVILTGSTGSMGSYMLDDLVALPHISRVYALNRAVNGEERQ
RGASSSHGLDTDFSKVTFFKTDMSQPRFGLDQESYDELLNNATHVIHNQWQVDFNLSLAS
FEPHIRGVRNLIDFAAQSKNNAIVSFISSIGVTQGKNWEKPVPELIIDDWNAAAMGYGSS
KLISEVLLAEANKVGGVRTQILRVGQVSGPVRKEKGRWNIQEWFPTIVSTSQYMKAVPET
IAAMNRIDWVPVDILSNIILDLADLSKPSSAPASSIQTPFYHLVNPTSITWSTISPILTA
QIGADCKIVSWDEWVALLRESAKRDEIAQNRGIKLLEFYEALGMGAPLALMETEKTIQKS
ETLRNTEPVNGSWMELWMRQWAA
>7e064f36-8cb9-4e1d-8c58-8958e13b79ff (mRNA) 247 residues [BFAB_07:997142-998570 - strand] [peptide] name=Bfab07g02800.1
MAAGMDPEVAEPNLPETYNAFFYGTLMAPEVLCRVIYGASNHPSTSLTITPALLYDYCRH
RVRFADYPAIISEPGHTVRGTYVTGLTPSNMRNLDYFEGSQYERKVVTVKILTPKDKEHT
HGASAIMAEAVETGEEKEAQTYVFTDLNALEKGEWDFEFFRREKMKNWADESEEYAEVDA
KAAKTNESEIGIHEFLDQPDPTGGRGIKTAMGKELKELADKKREEEWILEEKKRIAKKKS
KCQGTIG
>779fd08d-454c-44c6-a10e-ea3ef5fa1a3e (mRNA) 411 residues [BFAB_07:998972-1001023 + strand] [peptide] name=Bfab07g02810.1
MLLVSPHIRATGLAVLVGSSQAVASQISSPSNQTSVGLSEENQTLFCHYDTITHLMSKLH
GRIGINDDATKNFQLGREEPHFIDPKDLKLVAVYDLSNYNEADWVRINEQEIVLQCGSVN
TATTGEDWALMQRCTREEVAIRRLMATFNDEGHEFVVSTPVLRQASTIREGTHRCIKGSC
PKGPLALAIPTSATMLSNRAVAASIIRSGFSQPTVKHSGSGLNKPIETASQTTDHLQAQN
TPQIGSVTQSTIPMTITRASSLEDLSPKSPIENEVIEATTEDLPWPEDLPAGRWLAKRKV
DPMVSVKRPECIPPPDDFVLSGKVKTVTRNPRKTSYTTIEYWGYTSTAIIPPDPNRPPPQ
PSVISPTWVTASFFQTWSCRKIWMQYFNMDYVRKRDIVERVLDDLQAAARK
>27f44e6e-5777-4989-a710-57846c85f331 (mRNA) 663 residues [BFAB_07:1001317-1003732 + strand] [peptide] name=Bfab07g02820.1
MEKITEKIAALPPDTNYFSLEFFPPKTSMGSSNLRARLDRMSRALRPLFVTVTWGAGGST
ATKSLELAELCQRDLGLTTCLHLTCTNMSRALVDQALEDAKALGIRNILALRGDPPRSEE
YRALDEKNGDTPAMDWEFEWAIDLVRYIRKQYGDYFCVGVAAYPEGHADEGHPEGQSLEH
DLPYLVEKVQAGADFIMTQLFFDVDAYDGFEQKLREHPSGAFKDIPIIPGMMPIQSYQMI
KRTTKLSHAKLPSTIITRLDAVRGDDEMVKKVGVDILSEMVEHLKSTKSQYSGPRGFHFY
TLNLEKAVSFILERTELIPDAETVAALEPEYVPTIPDIADLLSIHSGSHKRSSRRRSSVG
SDPYNRIIITAPQTSNPSFEATAQEAGIPAEAVNSRANTLAISEGEGSLGREATWDDFPN
GRWGDARSPAYGEIDGYGVSLHMSINQAIKLWGHPSSRADITDIFIRHLEGQLTAIPWSE
EGLNEETNSIKKQLLSLNKKGWWTVASQPAVNGLKSSDSIFGWGPKNGFVFQKAFVELFI
PVADWKTLHAKLTSPDLCDTVSFYASNAKGDFISSDEAVGSTNAVTWGAFPGKEIITPTI
IEEVSFRAWAEEAFGIWGEWARVYGKDSQTRKIIDGIKEDVWLVNVIHHAYVEGEGLWDV
LLS
>18ccd5ca-8120-44d9-9015-d3bcf9711569 (mRNA) 215 residues [BFAB_07:1004992-1006163 - strand] [peptide] name=Bfab07g02830.1
MANWLDDGTTASALEHRFRPIKAAAKNATADKYGDGVTGKAISTRFERMRKESAWDLNSP
PGTNDFLGTTPKKARAQRTPKKNAKKAAVSSNEEGDDESDMEMPTPSKKGSPVKKETINK
VKGGRVEKKPATPSRAVKNAIKSYVDSDDDGDDDFIIKDEDFSAYDFGRAADGDEDMLRG
GVFDGGNGNGNGHGYGHGNGNNVAEEEDVFYDDES
>9b557eeb-e778-42a7-8f33-d58d943b8930 (mRNA) 533 residues [BFAB_07:1010470-1013193 - strand] [peptide] name=Bfab07g02840.1
MFYNYISRHLEIFVQHNIRKMFLVITPPKRDLSTQEETSIPLRRRRGLPKVHSGCTTCKT
RRIKCDEGKPECNRCKIFYKGTSQTCGYLAREIPKSRVATRRIILPKEVVNNIGQSILSH
GPIKNMSDINFESPRHFQYFRFFCSDVTTQVFGGFYSELWSSVVLQACHQEPCIIQAVCA
IGALSRVMKARKQGQLMAMNDDYRFAVLEYGKALEGIKKLVPIRMILLATLLIFSFENFH
GNQMAAITQIQSAASLLQAWMKDRENRQITDRTMSPAPNIIEDIIFATFHSTHIGLVSAI
DPTIAQAQDIIHGTQMYIPSPIPTRFTNIDDAGANFTAICKQVISFLMNTVTLIRGGGEP
TEEEISDSAIWNHRMLDWSPAAVEFKEILNRLDQWHIAFQPIATRAREEDADIMSIRMLR
AHWLTTRNSFLSAFFPHTPAHTYQSSFEEVVGICRTVAAHPSFEKGFVFHAGIIPSLMAA
AMFGVISTRKEAIKVLLDIVPRREGNWDAAICARNAIAALKMEYEKLKQAAGK
>10049d3f-4c25-44cd-b5ee-debaed957aa8 (mRNA) 282 residues [BFAB_07:1013657-1015205 + strand] [peptide] name=Bfab07g02850.1
MATQESEDPVRMLVLETDSPHPDIRDEKGGYSDILNALFQDAGKEHDPPLEIETEMHYVV
DDPEKGHHGHVPQVSDVDPSISAILITGSMYDAHGDDPWIQQLLQFLRDLWIERKDMKFS
GVCFGHQILSRALGAKVEQEPNGRWELSHTEMDLTSVGQRLFQTKDKKLSLHQMHQDQVT
IVPSASTTDLLTEDDNVENWASTEHTKIQGLYLRERLFTSQGHLSFDEDMVHLEIEMRVE
SGGIRDKEAAEKAKDTAHLRHDGLVVAGAILRFFHGDDRDIP
>576109b8-4330-4a0a-9a41-e3a1ede266b7 (mRNA) 332 residues [BFAB_07:1016043-1017635 + strand] [peptide] name=Bfab07g02860.1
MSFSKIFIAFTGIVAVASSNPLVPRASTACSTSSGPGFCQSTSSSCSGGKYIAGACPGGV
DNQCCVATCSSGKGVCQATSVACSGGSFSSGLCPGPADVQCCIKSGGSTTPPSSGAGSLG
IDISQLGTPAFFECAKKTKDIVAIRGYQQACGTGGQVDKNFVASYKNAKAAGFTRIDSYI
FPCTGTPTGSEPKCKSVDTQMAEYLKVISDNNMDIHTLWLDLEPTSVSNSPCNAWNLGAA
ANEKLAIQWVTAMKATGLKWGIYANGNQWSGIFASRSTDIGSDLPLWAVQEDYKEGVNTV
TTFMGGWTKAAAKQYSLDTTLCGLGVDLDSFA
>e32fb523-6e0d-4b0f-afe0-c417db3ed0d2 (mRNA) 402 residues [BFAB_07:1017746-1019401 - strand] [peptide] name=Bfab07g02870.1
MLRNTLLGPQFGIIVSPNSTMDYFHRFTSGSKGQAQASTSQSLSNSTNSEPQPKMENHRQ
QDESAASAVSSPSESKKPRKKKVLLMGKSGSGKSSMRSIIFSNYVAKDTRRLGATIDVDL
SHVKFLGNLTLNLWDCGGQDAFMENYLSQQRQHVFSSVGVLIYVFDIESRDFDRDLLTYR
SIITALTQFSPTASIYVLIHKMDLVLPNQREDIFHERITLVRSKSESFNIVPFATSIWDQ
SLYKAWAEIIHDLVPNLGEIERHLSSLGTIIEAEEVLLFERSSFLVVSSWTSPEGEANPT
TDRFERLSNIIKNFKQSTSRYTGTPKSAEQFSLFELKMPNFSMFVVKFTTNTYLAAILPP
GEERFNCALENAKIAARDFEELDSPARKSADRGATGTEAGMV
>d2c4dbed-2a66-4f23-9069-7c08acaa4d9a (mRNA) 588 residues [BFAB_07:1019976-1021976 - strand] [peptide] name=Bfab07g02880.1
MRLINTSSLCLEEFYDGHIPAYAILSHRWGKKEVTFHDMQAGNCMDIEGFAKIKGCCKQA
GLDGWTYVWIDTCCIDKASSAELSEAINSMFQWYQKAEICYAYLSDVENRPDSSNPVELE
SSDWFKRGWTLQELLAPKKLAFFDRNWDLIGSKDHLQDDLRKITGILDMDNWRRASIAQK
MSWASRRSTTRVEDQAYSLLGLFDVNMAPLYGEGKKAFMRLQLEILAVSDDESIFAWRDP
SETGGGLLAHSPEAFRDSAEIVSKPFDTIQKWNPNSTRRPHLMTNKGLQLELPLATPFTD
CPCGYVRHLAHESSAYPSDTKLAPLQCCYEGNTKPGNPHVLAVYLIRNRGNEFSRIDPES
IETIDIRQLDRSPLSRLKPEKSPCLDKFPQSRIQEYMESIFVRQHQPIDGVLDPYEFFVE
TKAFAELGFTMITEWLSNTRQTKTIRIKDGIRVQTNQLQPNGMTAIITFTQGGSIERGYL
GIYAFVLNITITSRGPLVSLMEVPVHQKQRIIEYEQESFNDGRSPHAKSLLRRHYAGDLI
APILTKAEDIPPWLKYRVLFAFKERALQTHVSNGYSLKDLFSGFLAAF
>46dd2bbb-ec49-4b38-b82e-0a1064f196b1 (mRNA) 326 residues [BFAB_07:1023361-1024513 - strand] [peptide] name=Bfab07g02890.1
MFENNPGPQTSPVTFKMDYSIPTMTPFDTPPNITYLPSMAFKKPTQDEKSVTQIHDAATL
EGQQIGAILPIRRALKATAFCSPLARVGDYVEILAYYNVSQVEVKNIRTSMSGTIDWEDL
LPVPYDGKCGCLGGGCRCIYETWQAYSARRPPRLMPVYGVQDMSGIYGMDFTLPTEEDWA
QVDDMYTKTYSSTVSPPQTSNDPNSSLYTTNFTTKTLPEVYDPLTVAGQTPGAILAVKQH
AHLPHDFGPVLETEIGDHCKFLEACEHGWGKVKVKNLRTGKEGYLRWQAFKPVNSRNTCS
CLKAWCYCEYDDFEKSKAYCEAAHKA
>f93b7722-b7bc-4a24-bd66-eaaadd831a97 (mRNA) 1379 residues [BFAB_07:1025961-1031043 - strand] [peptide] name=Bfab07g02900.1
MAGNTDSRSSLSPPPKFSQSDVPLLSDIEVGYEDGEKVNPSMSKIGMVKRAHKFHGAPLQ
TDALMEEILSPHSGDFNSPTSPTQWPASAKEPLLPGDEDIHIDNGNVEVIDPQPKTKVPY
ISAEYKLALSHFRRIFSYTDSNDKLLLLAAGGASVFTGITLPLMNVVFGALVGDFSGFYN
PNSNETKEVFTEAINQNVIYMLYLFLGRLLLDYVAVLGFRMVSIRISASMRIAYLNALFR
QPISVLDTLPSGQTASIITITANILQLGISEKLSMFLQSVSLILSALIVAFYYNWLLTLV
TSTGLIFIIAFYSYTIPRLVKMLKQVEEADQVSSSIASEVFSSIRMVVACEAEGKMAKRY
AAWVKESRRRGLLMSPLVAIQQAPIFFAIHATFAMSFWFAIKLYLESEIASVSIIIIVLS
SIMTIVMSIGGIAAPITAAAQAAGAAGILFSIIDAPQPKTNGVKAPKVSSREDIVLENVN
FAYPLRHDVKVLDNLSVRFPAGKLTAIVGASGSGKSTIVGLIERWYELDGNLTDNAITLF
FRNGTISVGGRKLHEIDLKWWRSQIGLVQQEPFLFNTTIYRNVEYGLIGTKWEHETYEKK
RRLVRRACKEAFADEFIKRLPEGYDTIVGDSGIKLSGGQRQRLAIARSIVKQPKILILDE
ATSAIDVRSERIVQTALDKVSKNRTTITIAHRLSTVIKADNIVVMKKGQVVQQGTHEQLL
LDLNGPYWALANAQQLGNGDLSRKEIDIPSDPEKRGIDSPIFERVSLDMAENLPSMEMQF
PDTKPKTPVGSFILFLWEQKPRWVWYTIMFLSSLGAGASFPLHAFLFAKLISLFNLWGQV
LQVQTNYWCFMFTLLAIGVGLSYYALGWSSNTVSFNITATYRQEYFQNVLSKPVSYYDEE
ENSVGSLTARMASDPTQLQQLLGINMAIVLISMFNIFGSVAMSFYFGWKLTLLTVVTTMP
IILAAGFFRLRYETQFEKMNNEVFAESSKFATESIGAFRTVSALTLESEICGRYEKLLRN
YTKKAFRKARFSTFIFAMSDSIAILCMAFVLWYGGQLLADHEYTPFNYLVVYLAVVQGST
TAGQSLSFGPNVAQAFAAADRIRGMRPEGKKGDESVLYDFADAHDPEKSSRGVKIELKNV
SFKYPTRDVPVLNELDMTIEKGQFAAIVGPSGCGKTSIISLLERFYQIQSGQILYQDTDI
NDVSLEEYRKFISLVAQEPSLFEGSIRDNILLGVSDEEEVSDTVLHQICRDAEIHDFISS
LPEGYNTAVGAHGVALSGGQKQRIAIARALIRNPKLLLLDEATSNLDSETERSVQAVFER
TGKGRTMIVVAHRLATIQNADIIFVLGEGGNVVERGSHGRLLGMRGLYWQMCQAQALDR
>67aaad60-630b-4aa5-9212-3986c5a86780 (mRNA) 262 residues [BFAB_07:1031553-1033087 - strand] [peptide] name=Bfab07g02910.1
MKFLCLCGAYGSSDKFRVQLAPLIKELASDETAELFFAHGPVDAFPPEGYEDYFGPGPHY
RFIKPGNTEEGGSDLLDRIRNFPKGATAEDQMRELMRGGISSAVPVPNADGTYGDESAQD
AMEYLYDIMQEEGPFDGIIGYSEGATVAGTLLLHEQKRFEVEGRTPMFKCAIFFAGWPPM
TPEFDGIVLADETDLTITIPTVHIIGSLDPYLAGCISLYNVCDMDNAYLFDHGKGHTLPR
DPETVRELGNIIRTMGSNIGVL
>39e04a0a-c3f5-451b-88ef-f403bf5dbfd5 (mRNA) 2249 residues [BFAB_07:1034195-1041705 + strand] [peptide] name=Bfab07g02920.1
MPPSATTWNSPQEGTNGAVEETVLEQTFEAAPAESNDAPEVKAFKDIYSQAFKDGYISGY
SQPQLAKQIPIAIVGISCRLPGNVSTPDEFWELCSRARSGWSEIPKERFDTASFYHPNPG
KAGCFNAAGGNFLKEDVGLFDAPFFSLTAQEATSMDPQQRILLECTFEALESAGIPKHEI
VGKDVGVFVGGSFSEYESASFVDTDSVPMYQATGCAFAMQSNRISHFFDLRGPSFTMDTA
CSSSLVALHQACQSIRNGECKSAITGGCHLNMLPENWISMSNSRLFSDEGRSFSFDSRGT
GYGRGEGCGLIVLKPLEQALKDNDNIRAVIRGSGINQDGKTPGITMPNGSAQESLMKWVY
ESAGIDPKDTGYVEAHGTGTKVGDPIEATALYNVFGEGRNARNPLFIGSVKSNIGHLEAA
SGIISVIKTAMMLERGFILPNHDFKTPNENIPFSKWHLKVPISQRPWPRDKKFASVNNFG
FGGTNAHVVIERAPFITKLEPESSEKALQDRRMIALSANDKGALEALMKNIGIYLERRPE
FFQNGLMSNVAYTLGQRRSLLQWRVAIPATSSFELIQALNSGKVTPMREIEPLRIGFVFT
GQGAQWNAMGRELYEHYPVFAASLDACDKCLVSFGAPFSLITELNKDATSSLVNEAHISQ
PACTAIQLALTDLLRSWNVIPAAVAGHSSGEIGAAYATGILPLDSCMAIAYYRGLATVGL
RKKFPDLRGSMMAVGCTKEEIEPLIDQLSAKTARIACFNSPSSLTISGDEPAIDELQALM
EQKQLFNRKLQVDVAYHSHHMSLVSKDYRSCLQSLAPPKTSKVKFHSSLLGHLVEGSRLE
AQYWVDNLTQAVRFSEALTDMCAPGDGHKTGVNMLIELGPHSALAGPIKQILKACGKDAM
KIPYASALVRKKDAVETAIDLASTLFTKGAFLDLGAINITPPLNPPSLLIDMPRYPWNHT
TKYWHEPRLIQKHKNRTAQRHDLLGTLANYSNDLEPTWRNILRIDDVPWLRHHKIQSLTL
FPMSAFIEIAIEAASQKAASNSIQYDKFELRDVFVTKPLMLTEEPVEITLQLRSRTPDNS
ASDIWDEFKVHSWAANKGWTLHCQGIIATKTGNRDLGLKMKSNIEKITEAAKHVINKTEI
YDSLSNIGVSYGSSFQGMNDCFACEDASMASVVVPDTKQEMPKEHQEDMIIHPALLEQVI
EMYWPIIDSGKTLLDTVYLPSSIGQITISRGISKLMRSPGASLRAFCEGKFPSGYPKPTS
VSMFAVQNDLSKDPLITIRDLTVSPIIETNLNSENEVHRELCYKLDWEPIFQSSVSAEQN
GISNGVPETSNGSVNGITNEVKNQDYSSEGIVIIHESSDEQIALSTRLATSLEHLTGKRP
EMGDLAQVETTEKLCLIISELDKPLLSTLTCSQFFELQKALIGSRGVLWVVKGAYGDSSN
PTTNMVTGLSRSIRSETMLKFSTLDLDPESVLSDENTTNAILKVFKSVFDPEADANCELE
FMERKGVFLTPRIVNDSEMNEYVHKQTKDSALELTRFGQEYRPLKMAISVPGVFETLHFI
DAPSEESIEDNSIEIEVKAIGMNSVDLAAVSEHTDYDGFGCECSGIVTKTGSRVTNFAKG
DRIAGIAVSQGVYSSRVLLDSSAAFKINHDTSFEVGASIPVSFCTAYYGLNDIGRLLPDD
TVLVHGGSSAFGQAAISLTKIMGANVLVTVGSIEKKNLLKEIHGLSEKEIIVSQNTSFGP
KDLQQTHRDNFDIVLNCIPTDADTLQEISSCLSNFGRFVNLAKQENHPKLGSGTNRSYSS
VDLISLRIQRPRILSAVLSQISSFLIQGAIKPISTTVFSISDIETAFKTLQSAKFDGKLI
IAPNPDDLVKATPADNRSKILRSDATFILIGGTGGLGRSMARWMVSKGAKHLVLVSRKGS
VNGKVREMVDDLKTVGANIVIRRCDVSNSEAVNNLVTNELTDMPEVRGVIHGAMVLRDVL
FEKMTYEEYTSVIESKVQGAWNFHNALKSQELDFFVAISSAAGAVGNRGQAAYAAANTFL
NAFVQYRLTQGLPASSLDLTAVSDAGYLAENLDAAAEVSKNLGSDTICEAEVLALLGAAI
TGRLTSTCNNHTITGMRITTPPPFWTNDAKFKHLRLAHEALSSSLSESPSANISFNAALK
NATTIEEAQEAITRGLLHILPSVLMLEAEDMDVTRSLSNYALDSLVAIEVRNFIAREFEA
NLQVLELLSSGSIEMLARGICGKSKLCSF
>9e35f876-6594-4ed3-817f-bb7fff51059c (mRNA) 572 residues [BFAB_07:1078373-1080551 - strand] [peptide] name=Bfab07g02925.1
MHTQSPSTSAQIEEKLQKAIISLQLKEFKSIRKAAEHFEVPKSTLADRLAGKKTRSQTHE
MAQILSNAEENTLVRWISRLTITGFPATPMLVKEMADEIRLRRVRVASSRNPTSTEIPPI
GHEWIYRFQKRHPELKTCYSRQLESNRAKEATPKNIQAWFDAFRMRLIERKYELDDMYNM
DETGFGVGSTQSTRIIVDSTQKSNWKVTAGKQEWITAFECVNAAGNALSPMVIFKAQNTN
SAWIPKDTPQSWQFSTSTNGWTSNSHGLEWLKRVFEPESKKVSGDRPRLLIMDGHSSHIT
GSFIAFCIDNDIDLLILPPHCSHLLQPLDIAVYGPMKRYHALEVDRYSRAGVKRIQRAEW
VELFQNIRKKALNSSNIKAGWRGAGLVPFAPRKVLDSLPFNSSQQPSTPQMRTPNQDLDL
SILRSSPPDGTELRQANQIFNIALASSGSPASPTRRYAKRMTRLVESQNAEIALLRKQLS
DAQEVIETRKKRTKGKRVKLQGQFVFSTKEVLKMVREAEEKPKEKKPRGRPRKRPIEESE
EEIEEEELENSSSDSELELEDCVARRTRSRVE
>b7cc19d7-506b-47b3-8027-924303e7d994 (mRNA) 658 residues [BFAB_07:1087480-1090336 + strand] [peptide] name=Bfab07g02930.1
MPTSKMSITPISPGTSTSHSHHHRGHRLRNFMLPNGRKVHIAPSPEEADLLRRRLSTIEK
DQPFDLVINGSPEHLDALRTAHTHHESKRQALKDRHGDAYDEFENVKLELDVLGSELHML
TDHSVALDANFSKYGYSAELRTYDDGSEHTSRASSMYHGPDDHEKKDWAAEKRKGRIMKL
YKKPTVRQYFHRGLLWRASGTTEVASFELFVDLLYVGILAINGDHASENPTGYELLRFVI
TFIMSWKIWSDLTLVVSWFETDDIAQRVSMLFVMACLLGLTTNILEAFENSYTMLVAFYL
TARLFMGSYLLFLAWCIPMVRGMLISQAIIIMIPSIIWIGSIYVDLPQRFAIIAIAIFID
LTGAAGIIFLVRSSKFISTRLAEWTDRVFEFYPATNIEHKTERTNAFVTLVFGYSVVAII
YQNAAPFGLNAFFGKAVLGLIQAFVFNWIYFDLDGTDLFAHAIRRDAMASIIWNFAHLPF
IMSYVLGGAALSRLVVARDCGDASLESLTEAYQEKSESEISDGLRWFYCVGFGVALFFMG
MISACHIHKKDHHGIRLAKRYRLLNRLIVCIILICLPLSSLNSLALVSTVTGLVVWVLVL
ELWGHSCPDETFFGGGKKCAYTAKCKISRKDLEEKRRMGEVLKLKELGGGEEGVYEGS
>47da4f25-c381-45cf-a96d-8438dbce5fde (mRNA) 344 residues [BFAB_07:1090627-1092374 + strand] [peptide] name=Bfab07g02940.1
MIFPSIILALFTLSTALPQSPTDTNITNNPGSWHRLPPIPLHPRQEHTTVYLDPYIYILG
GIITSYSTSDPYPTTTLMQRFSLHTNTWTRAADLPLPLNHANAAILNGAIYLLGGLTPDP
NGIWIANPSCFRYDPSSDTWTQLFTSIPSSLQTGAAAVARRGNTIYLAGGLTYLNVSETY
QPSVSYFTAYTSGFESWTSLPALPQARDHAGTGFLGDNGPFYVIGGRAFGRDNVVDTNYM
YDFQKGKWSEKKKMPTPRGGVASAVVGEKIFVMGGEGNPESKSGVFGENEAYDTGRDQWR
SYAPMDVPRHGTSGVAVGNKIYVPGGGLTEGGDPTDYFSYFEVP
>ae35318c-a2a0-4d2d-a869-bf996b61f864 (mRNA) 137 residues [BFAB_07:1092443-1093103 - strand] [peptide] name=Bfab07g02950.1
MYPKISLQVTTAIAIFSALTSALPSPIDTITKTSACSAATLDTTCIDTYNSCMTSASGDN
DAIQSCALNLSTCTGTTAKRDPENQEKRVATVCTNGAVGSVACVGTFATCMQAAVGAGQI
TSCALALSACEVGVNTK
>590386fc-7d26-49e4-8093-233968ebc694 (mRNA) 515 residues [BFAB_07:1095115-1099947 - strand] [peptide] name=Bfab07g02960.1
MDSRPPSTRMPTGLAEVLNEVGPDERMRDSAYYSNLDSSSKHNSQQLSNGEVIMAPSPTG
YNSSSADISPSPAANHIANQQLTSPTSNGMSVASMVSPSYEHSMANSLLSMGQGNRQSYG
SGLGAFSMNGDSRRESVDSRLGFQELRLNSPYASNNQSTTSIQSTLQQQRNPGNAADRLS
NPRFSNSYQPQRLPEPTSPRSTAPKTAPKITGPAMSSIARAAEPTRGEAWAFPEEPIRVS
NSHDRHAEDSQSISRVGTSFLNLDSRRSSMADSVASSQYTTESRLPAGQRRLEDGVSADF
RSSRASSEFQNVSHHHHSLQNRQVSDLQAEDADSPNNGQPYSRTPELRVSHKLAERKRRT
EMKELFETLRDLMPQERGNKASKWEILTKAIAEHHSQTKEIQDLKSRLHNSQLENESLRR
ENNVIRLENSQLRSEVNQGGSNNHQSVMNGFTPIPQNGGQHVNMNAYQQENYAPRGSYQR
EEQLPPLRGMSQPDSMSGVQYQSDLNRNGYRDPRF
>d2d7628e-f24f-4da3-a95b-dc4c832305a0 (mRNA) 495 residues [BFAB_07:1108420-1111128 - strand] [peptide] name=Bfab07g02970.1
MTILPKRYFRAPRSPLHPHSRLPNLFLALLVFFLFDAYWIIIQLPNPIRTITPQFSAIDP
SDSTSNQHEAPSLPGQDSLSMKRVGGEGNQESSLSSDAESRQVFQGSKTQMGNPNNEKIF
IAAIFRKSELMLRQNWSPALVSLVQHLGPQNVYVSIIESGSWDGTKAALMDLDGILGEAG
VERTIELGMDRLAQLEELKHVPEEGQDRTGWLHTGRKESESGWEMRRIPYLARLRNRAME
PLLRAWDEGRGRKYDKILWINDVVFTTTDVTTLLATNNNFYAAACSLDFSYPSQYYDTFA
LRDSSGRKTASLSWPYFYASQSLNALRRNDPVPVKSCWNGMVVFDGEPWYPSSFISSSLK
KEFQGLKFRGIPDSLAEKHLEGSECCLIHADNPLREKKGIYVNPSVRVGYKRETYEMVNG
KGGWPGRWEAVRGVWGIRMGWVREWGSGWVERGRVGRRVRKWVKEGEGEEVRVEMGLECL
INEMQVLYQSGWRHL
>e034cca4-f1e4-4921-a17f-20a5c4de9225 (mRNA) 373 residues [BFAB_07:1111852-1113418 - strand] [peptide] name=Bfab07g02980.1
MSPSTLFTPLKVGTSELQHRIAMAPLTRFRADDNHVPLPMVAEYYAQRASVPGTLLVSEA
TFIAPRAAGYANPPGIWNKEQIAGWKKVTDAVHAKKSYIWMQLWALGRAADPSVLQQEGG
YKLQSSSDIAFEGGGKPEPLTEAEIKEYIELYTQAAKNAIEAGFDGVEIHGANGYLIDQF
FQDTANQRTDSWGGSVENRARFGLEVAKSVVAAVGAEKTSMRLSPFSPFQGMKMADPIPQ
FTYIAQELKKLNLAYLHVVESRIIGNADIEATEKVDFLINIWNGTSPILLAGGFTAESAK
KAVEEEYKGKDIVIVFGRYFITNPDLPFRVKEGIEFTPYDRDFFYNKKEAEGYTTYPFSK
EFEAQRKAIESSA
>7713e7d0-bda6-4c32-b456-896f560a8843 (mRNA) 704 residues [BFAB_07:1116447-1119154 - strand] [peptide] name=Bfab07g02990.1
MLPVLHVPAMTPEATKRSKYATIAPQGGEQYIQAHNQAACANVQDRVMPERPVQPLPMGN
SSPSHQNSRSLPSREVTDENFDDAYVGFIMYCNPAVASDTDTAELKRIFRAPPRSDNKSF
STFVLFELICKLENKEIKTWAQLAIDLGVEPPSLEKGQSAQKVQQYAVRLKRWLHAMHVD
AFFEYLLNKPHVYWTQVPSPGEPPSELGRDGVTADEDLALRALLPETRPKRGRKKAEDRE
DDEIKRSPSQRPRLHSPTLSEDYMIARTSLHPDSATPATAHSSFQQGFDARLSPWSAATE
VRGSLVDNFRWGAPPESATPLSAYPQSALTPSNRTHLWPDSNEPQSATTPNRSRSRRRHG
PAVSSAWPSNGSASTGKLRGRPPNNRSVTDGPFSTFPANPGSIRDTPTATPIVADSEIPH
FFPTGVRTNPPTAVPQTQNSRPNRLSLQVPQRKGGNVRLATPPPPVVLLNGETGTNMQND
LIEQSQQTSFMEYFNNHTNGPQDPSFEHFVSIAFRQNEDFDRTNIDALESHFIGEILVAE
WYDVAGNSIPRCSIDEASKICKQVIRNLQAESSSTEAFLINLSALAGGPLMTRLRVTRLE
FPGPPPRTNYECHWKMRFGSLEGDFTIRATVVGNDSEMGMGEGMGDMGRGRDDEEESWKA
KYLSLQQQIKERDAKVMRLKRGMVDALVTSEEWIKGGKVFQNQG
>703bfef5-99da-4998-a782-fdd7446319f0 (mRNA) 311 residues [BFAB_07:1119454-1121031 + strand] [peptide] name=Bfab07g03000.1
MAAQQSDNVAHALSGAGGGILSMALTYPLITLSTRAQVESKRADSGFLDAVKHIIEREGI
TGLYAGLDSALFGISVTNFVYYYWYEWTRSGFEKAALKAGRASKKLTTIESMIAGAIAGS
ATVLLTNPIWVVNTRMTTRKRNETGENFVPGAKASKAPTTVGTLLALIKEEGPQALFSGV
VPALVLVINPILQYTIFEQLKNAIEKKKRITPTMAFLLGALGKLFATSITYPYITVKSRM
HVAGRDGGKESMVQGMRRILKEEGYAGFYKGIAPKVSQSVMTAAFLFAFKDVLYEQTIRL
RRNLPAKVAVK
>2c8d9cf0-aa8f-4536-95a6-5945904e15bb (mRNA) 723 residues [BFAB_07:1121112-1124089 + strand] [peptide] name=Bfab07g03010.1
MGDSTEVDEYGFSSGDEADMLDLTNAVDGSTNHGHKRKASSDQTSSIVKKQANDSSHKVF
ESATFALSRNFGFKSFRLKQEQAISRILGGDSAVVVFPTGGGKSLCFQIPALAFEEEDNL
LKTRDEGEHGITLVVSPLIALMKDQVDALVRRGIAAATFDSSKTREDYIQTCNQLRSGKL
KLLYVAPERLNNEGFVEQMKYVRGGIRLLAVDEAHCISEWGHSFRPDYLKIARFADEIKA
ERVICLTATATPRVAQDICDAFKIENSGLFRTSTYRPNLHLLAESGDRKVTMLPKLKEFL
QKHKGSTIIYVTLQKQTENLANILVEAGFKAKAFHAGMTTEAKTKLQDDFMRSNDMIMVA
TIAFGMGIDKGSIRNVIHFSVPQSLESYSQEIGRSGRDGKTSNCFFFVCGEDLHFRELFA
RGDLPSLESIRGLLNDIFDSTTKKLPIGGEIHSSHYNQTKEFDIRSTVLGSIYAQLELRH
GLIRATTPLYQKYSYVANDRMYHSKIKSDRSPAAAAIAACGEKKTKFHHIDVDAAARRYN
LGRNEVIGKLNEWNAEGILELKASQVLNVYKVTKPLPKTTKEIETIAKTIYSSMEIREKQ
ALERSEKILQLITGRACFSKTLAQHFGDELPDGKKECGHCQWCLTHKPVEIQLPPPVPFN
TMAFQNILNMIAERDDPRFLARVAFGISTPRVTAMKLGKSPIFGSMDDHEFSVLLEAFEK
ECK
>dd5f1a04-9a0e-4535-bade-5818cab70ad9 (mRNA) 296 residues [BFAB_07:1124140-1125406 - strand] [peptide] name=Bfab07g03020.1
MSKSHSLLRLIRRRASKLSSASSTCQTKLATTYICQKSARCLATVNAGPKVLPDIWFTGS
NPQNEDSLLNPKNSNKPPNNERTVKLGKTLRILQERLPTLLQSPLPQEILSPQITLHLFP
STHPHLPAVSGRVAYSAALWTSPIAWGRVPLVGNVKLEILSERMSQTSSCRGSTREQLIV
RWKTIGKTKNKGTGGFYKGIGARENVDKITEWLGGGSGEDDSKEFTGLFLFQFDEEGRIW
SHTIEHVQEGGNWEKGVGAKVVGLTDWLLGGMKNGRGDEGSPCPAFWVHDQDLGRR
>d6acd06b-2c8d-4abb-a4c2-05777c393322 (mRNA) 201 residues [BFAB_07:1125890-1127594 + strand] [peptide] name=Bfab07g03030.1
MNPEYDYLFKLLLIGDSGVGKSCLLLRFADDTYTESYISTIGVDFKIRTIELDGKTVKLQ
IWDTAGQERFRTITSSYYRGAHGICVVYDVTDMDSFNNVKQWLQEIDRYATEGVNKLLVG
NKSDMSDKKVVDYTVAKEFADSLGIPFLETSAKNASNVEQAFLTMARQIKERIGTTTANN
KPAVQVGQGQGVQSGSAGGCC
>e6b7f3a3-dd6c-4a4a-968c-e5bb9c67c993 (mRNA) 603 residues [BFAB_07:1128105-1130712 - strand] [peptide] name=Bfab07g03040.1
MAPIAPQTVDIIFAGGGTAACVCAGRLAKANPNLRILLVEGGKNNFQDPSVTTPAVYLSH
LTPESKTALFYKGQPSEHLNNRSPIVPAGGLLGGGSSINFMMYTRAQSIDFDSWDTEGWT
GKDMLEMCKKLETFHPTGEGFDEEKHGYEGPVNVSNGGYSGKSVDAFMETIKGMGYREIV
DLQDGEECGGFSRWHRYVSPNGQRQDAAHTYIHPLLQSSSYPNLKILTESKVLRVLFDSS
TPPRATGIEYVPNEDRQPFVALSKAIPHTIRAEKLVVVSAGALGTPQVLERSGVGRREVL
ERCGVEVVNELEGVGESYQDHHLLLYPYKTSLDDSETIDNILSGRKDFVKALEAKDPQLG
WNSVDVCSKLRPTTSEVEALGTDFVSDWDRDFAPYPSKPLMLCAVVNAFLADPTLVDPGQ
YITMGTYTAYPYSRGSIHITSSTDVQNGYEFDTGFLSHPSDLKKQLWAYKMQREICRRLP
YYRGELELGHPKFSKGSAARLSNGAIEGEIKDIEYSAEDDALIEDWIRDNLNTTWHSVGT
CAMKPKEKGGVVDKYLNVYGTQGLKICDLSMVPENVGANTNNTALAVGEKAAVIIGKELG
IEV
>c78a13c1-09fd-48a9-ad6c-9979013279b2 (mRNA) 1468 residues [BFAB_07:1131933-1138936 - strand] [peptide] name=Bfab07g03050.1
MSAATDQVVVPSEGEQSAIPQGLASPPESNNTIRTDPSSDSELSDLEFTADEPIEPEHYE
DDGRVPVFVPTMAQFKDFNLFMDKVNKYGMKSGIVKVIPPPEWKAALPPLDDAIKTIRVK
DPIKQDIMGQSGTYRQANILHQRSYNLPQWRQLCDQSEHQPPAKRGERRANVEKVKATTR
AKASTPGGKRKPGRLSRLKTNATVDSEVGTPDRLPTPISPKIEGDSPSVKQEVNEDDTPV
RSKGGRQPKAISVSSRRKNNRRGEAGVVDEAAFENFKYELEGEDYSAERCEELERHYWRT
LTYAPPLYGADMMGSLFDDRTTQWNLGKLPNILDHLGGQIPGVNTAYLYLGMWKATFAWH
LEDVDLYSINYLHFGAPKQWYSISQGDARRFEAAMKNIWPADAKACSEFLRHKTFLISPQ
HLLSNYNIKVNKIVHRPGEFVITFPYGYHSGYNLGYNCAEAVNFGLPSWLEYGKVAKKCD
CDQAQDSVWINVRDLERKMNGEETEYETDFDEEEEEEDEDENETTGLPTPFDSNGDAKVK
TKSQRKRKRVKSESDEQHNVKRIRMRIKAPADEPCVLCPNDIPSEPLLPTEDGKQAHRMC
AQYIPETIVEEVDKKEVVTGIKEISKARFDLKCNYCRSKKGACFQCSKKKCTRAYHATCA
AAAGVFVEQGEIPVFGEDGTEYKEWGIEFSCRFHRIKRDKRLDSESLEEDDRIRDGAKEL
KAGEVCQMQFHKGDIFAGTIIENRKDEETVLVDILPRGDCVEVEYKWILIPDASFFTLAK
PSEKAIPMPKSRIEAASLNTTKRQVDDIPRAEDPFVKGFTWAEFNTESIPRNAAQVKLDL
SKENQVWYYLGKNSTEARAQFTEDLKIQRHNPKGHFLDTIPKPTTAAPRTSYAASYPTST
NKFSATTTKIPSANTSNMGSGVQAMPKIPANKLVNQPASSSATSTPFVARSDKPYVYKPR
KSEDGYHSGLIDAQSYQSQQAFLRQSATSRPVQVPAVGLNFGTDPRFQNNPASPAPTSTT
PPANVSTNPSTAIPPRAAYTPNNSYAPQVSYPPQVIYAPQVKYAPPRQPHQAATARQSQA
TASPLAPPNTNYRPTQSQAKGNNPFSSRAAAPKMGNVFAKYLYLQIEHNRSPMEYKSPYR
EGGGFMNGYQGNWTEHLKKTLFAKSGSSTASPPTSISSYTGGVGRKTSYPTSYTPQSSRG
SYSSSGSQIYSPGTSSARPSYTSPSMPRQQQTPTPHVTPKPYDTNQWERKDSPLHPAIRK
EYSSMFHNHHVPQPQGQQTPQQQGHQQHNKSHDSTQDQNSSYPPSDGQGSPAQRGSESQT
PKTTDSKQAQQLQEPQKSQQPQPPQSQPTPQVAQETDQNPLSQPQPVEKASLTTPHSHSS
PLTQQEPGQQSINTSDQSQVPLQPPQQESKPIYPHQQYSQTLDASQAHPQTFAPPPQTHD
LPDVPIDSESLIEDMLKNLRKVTTSTAK
>2f7238ed-d1f9-4257-ba51-0ee4a52ed2db (mRNA) 458 residues [BFAB_07:1140184-1142700 - strand] [peptide] name=Bfab07g03060.1
MAASVVQNPASKPESKSAKKKKAKTEAVDVQKPAAQAEVAVAEKAPSINAEENSNGDGAY
ESPYIKELYKNIRNVNKKITNASKVDNVLAENPGKSLDELVAARKINADQKAQILKKPSL
QASLTQLEEQIAQYKKFDQEYKTKLQVEKAEFEKTFNERASKELEEKVKAAKDSVAKEKA
EEQDSNLLLITKFLCLAALRRSPENDPELDENKGIEGLLTQVYSGDEAAVAAMTKIIQGS
SEVCSSVNGEELTTTFADIKAIALALPTTFVAEPTEPADEETTQTEVAEYPVQSDPTIAN
AGLTEIDDPVTSALSNGHQAPSFEEAQGIPQNSAFGEGGNAAAEANWDNNNDLSASQEWV
EIPREATETDVGVAATAAAAPNTQSWADEQPDSPNSKTPAPPVSNNDGFHEVSRNRGRGD
HRGGRGGRGRGGFRGDGHRGRGRGAPRGAPRAPRGESS
>be19408c-0cf5-4d7a-89c0-4a366e28f1fb (mRNA) 78 residues [BFAB_07:1142772-1143674 - strand] [peptide] name=Bfab07g03070.1
MATGQKLYPRANLKKIVKAHSKRNLTKNVDVLIFLDYMLFLETLMKEAGINAKQAGERGI
SAKSIKKVTELSLSKFKG
>a4a06e6e-0651-48c8-a78a-dc153247e072 (mRNA) 883 residues [BFAB_07:1143812-1147485 + strand] [peptide] name=Bfab07g03080.1
MASSASDRDVLPDSVKPSHYALSVYDIELGGAFSYQGTVKIDIKIVKPTKEITLNAFQLK
VHEAEVSLTSGKTSQSIKSSEISYDTKKQRVTLSFPDELSVSENALLAIKFQGTVNNDMA
GFYYSKYKPQVTPAASVPKVDEFHCMYSTQFESSDARRAFPCFDEPNLKATFDFEIEIPK
DQIALSNMPEKGSRDSKDGFHFIEFERTPIMSTYLLAWAMGDFEYIEDFTKRKYNGKALP
VRVYTTRGLKSQAQYALDHAPKVIDLFSEIFDIDYPLPKADLLAVHEFSHGAMENWGLVT
YRTTAVLFDEKTSDTKYKNRIAYVVAHELAHQWFGNLVTMDWWSELWLNEGFATWVGWLA
TDHFHPDWCVWDQFVAEGMQTAFQLDSLRSSHPIEVPVKDALDVDQIFDHISYLKGSSVI
RMLATHLGQKTFLKGVSDYLKAHAYGNATTQNLWSALSEASGLDVKAIIDPWITKIGYPV
LTINEEPGQISIKQSRYLSTGDVKPEDDETTWWVPLDFQGKVGAKGAQQIAFEQKEDTVR
DVDDSFYKVNTDTAGFYRVNYPPSRLAKLGSQLDRLSLTDKIGLIADAGALAISGQAGTP
AFLSLVQGLANESNHFVWSKILGPIGTIKSVFSDDDAVSNGLKAFLLKLVSPAVEKIGWE
QPADEDFLKSQLRPQLILSAGLNGHKEIIAEAKRRFDLHTSGKDKTVIHPSLRTAIYGLS
VRYGDRSEYEALKKEYRETTSIDGKEIVLRAMGRVQTPELISDYFEFLFEEVATQDVHTG
ASALAANTKTRYQLWKYIQDNFDPIKERLYANMVVFDRFIKVSLSTFSDDNVNKEIAKFF
ENKDNRGYDRSLAIIGDTIKGRAALKSRDREVILEWLQTNGYC
>e5511cb8-ff78-4114-9006-4e1b3973f67e (mRNA) 384 residues [BFAB_07:1148671-1150490 + strand] [peptide] name=Bfab07g03090.1
MPPKRAQCKHVVLSDEELQSGITTLENVQAGVEEFHSNGLVIFENAIPHDIVDKFYEKIN
ADGASRLEDPKVAFNHGNEKTNFSTCPPLSKEWLVEDIWANKHAAAVMEAVIGKPQLAYT
GSNINLPTADPTSRQAVHVDSYHEHHKFPTCIELFMYLHDVSPTNGSTEIWPGSHHEWNL
GNHESHGRGWVKASAFNRRAEHSPPFQPTIPKGSIAIRDLRLWHAGMPNLSDQNRIMLGF
IYFPRWYRNPMRITLPQNCKSVVEKWTQVDAIGATQFVDGEVDHLDQTLGMLAYLNFTQD
PETGIKQIREKIDLAQGREPNAELKVTENNYWVPGRKRLSDRVTEGPGGKNDRGKARQRG
RGKGRGQFDPLKPKGGRVKKRTAK
>c40997f4-d9cc-4e5c-b410-73620f769d68 (mRNA) 282 residues [BFAB_07:1150463-1151733 - strand] [peptide] name=Bfab07g03100.1
MPSGERRPRLDGWGRFKVTFITFALYALGFPILLFHILLLIGCATNSPGMDNIYVASLSD
GVRFSYTSLCAPTTTGRTCAPSVGKSPLILTTLYNFTTPASTLKYVIDVQTRISFVIPAM
SALLFLSALLTLFSARGIIQRNGTNPPSHVFTITLLFWSSAAVAFAAAYSLTSSGAALAV
HFPSSLSSSSNSSSENTEMNIEPGKVMLALQWITWIFSTVAAMMSGSITKSFLNGASSRR
RRNSRSGSPYARRPSMRRANRSSVPPYSRDHVPRSGSPVSPI
>834b3639-0ac7-4e8b-8104-1d4f4126f2fd (mRNA) 512 residues [BFAB_07:1152706-1154816 - strand] [peptide] name=Bfab07g03110.1
MRMKTIELQISAATAPIPRRARDVKVDRNGITCYDEEITRIVDYTYDYEITSPLAWTRAT
SALLDAIGAGLESIATSSELSQLVGPTFPSPDTIPNGFKLPGTNYQLDIAKGAFDMGAMI
RYLNHNDAFLGAEWTHPSDNLGAILSTADVLSRVATSKDDQDSILTMRHVLIALIKAYEI
QGCFQGKNAFNRAGLDDVILVKVASTAVVSWLMGLPKEQAKAAVSHAWIDGSPLRAYRQA
PNVGPRKNWAAGDACMRAVQLTLMAKTGQAGVKTALSAPRSGFYDVLFRGNTFDLPRPFG
TFVVENVFFKIYNTESHGMTALEAALLICEELKEKEVSASDIKSIQVRTQEAAMVIMNRQ
GALQTPSDRDHSLGYMIAITLLKNSLPEAEDYQNTSPWSKDPRVEELRDKITIKEDPEFT
KDYHNQDLRSLANAIKVTLNDDAELEEVVIHFPQGHARRKESLELIEKKARKNFALKLSE
ERIDTILEKTKSMEFFGMSVCEFMDLFVPNKE
>d67aab8a-8c09-4747-931b-2d7ba3fa63f3 (mRNA) 174 residues [BFAB_07:1157424-1158880 + strand] [peptide] name=Bfab07g03120.1
MQVIDLILCAQSSATLIGGLNYRTSRTWQNLTLTDLIVTTQILSFIMQFKLTPLLLLLLP
LSLALPEPISEAIPETGFKEGGAITPRDGPDTLIARACSYTTGCTSQSGASAGKYCGFCT
QVRGTYHIGDIYQVNGGSGSSSCCSYGASSACAARWPAVSPDVLVKCANNGRGY
>7a62eea7-a865-4fd6-b4dc-a6070eef47a5 (mRNA) 426 residues [BFAB_07:1159625-1161087 + strand] [peptide] name=Bfab07g03130.1
MPSRTDSPFNLQTCARPNILALEPYRCARDDYKDDGTNILLDANENAYGPSLPDSVTSNQ
SLNFLGLNRYPDPHQHPLKSLLCKLRNTHHHTDLPLHPLNLFLGVGSDEAIDALLRCFCT
PAIDSILVCPPTYGMYSVSAQVNDVALVKVPLLPAPEFGLDVPAILDTLSKPQPKPIKLI
YICSPGNPTGSLIPKEQIEQVLSHKTWNGIVVVDEAYIDFSPDGSSLAEWVNEWPNLVVL
QTLSKAFGLAGIRLGAAFASVEVAALLNNLKAPYNISSPTEALASQALKEDGLSVMTAHK
EKIVEQRQRLLSELPKVKGVGRFRGGVASNFLLVEILNENGQPDNEVARKVYESLAENRG
VVVRFRGKEHGCLGCVRITVGTEDEVTRFLGQIGGVIEEVWKGEGAKVESAEAEQKKEVE
ANNILA
>cd453936-4c06-48a9-9c93-5a22a9efeaeb (mRNA) 436 residues [BFAB_07:1161860-1164169 - strand] [peptide] name=Bfab07g03140.2
MSSSSSQGVMQLDQFSDQPADQLQLVAIAAIANMPVPSISSNSSEDNLLETFGSNLSEVT
TPKLSNARVVQDPQVEFITVQNNTALSTISCTFPNFQNLSLELRTMIWKLNLPGARIIDV
IYDKDQDRYLSFHSKPPSLLHINKEARSFAQKVYNLSFPTQSHPANIYIRYDIDVIYFSN
WLTGYKYEENGWFEHVDIGPLGKMGLGRQDLKSITRVAVNSIYFDVPQRFSANSMEYFCH
STSNILARFSSLKRLYVVVEDINPYQKGDITLHNIPANIRLHPSNFCVFCGALKIVRGFT
DMKWDLTCTWKVPSVSVVGAARNGKLSHMGQYQRCDCNNSRIPGVTYQHPPCEEYHPKPA
KLAGQVDDVDADDFKSKFDKDDFPEEEWGLAENELSELISDEESYHTFVVEYCEGEYGVN
HEKWLGIDYMLSRPFL
>0ed4cfab-4c0b-4aad-8001-7137ba68f2ac (mRNA) 426 residues [BFAB_07:1161860-1164169 - strand] [peptide] name=Bfab07g03140.1
MSSSSSQGVMQLDQFSDQPADQLQLVAIAAIANMPVPSISSNSSEDNLLETFGSNLSEVV
QDPQVEFITVQNNTALSTISCTFPNFQNLSLELRTMIWKLNLPGARIIDVIYDKDQDRYL
SFHSKPPSLLHINKEARSFAQKVYNLSFPTQSHPANIYIRYDIDVIYFSNWLTGYKYEEN
GWFEHVDIGPLGKMGLGRQDLKSITRVAVNSIYFDVPQRFSANSMEYFCHSTSNILARFS
SLKRLYVVVEDINPYQKGDITLHNIPANIRLHPSNFCVFCGALKIVRGFTDMKWDLTCTW
KVPSVSVVGAARNGKLSHMGQYQRCDCNNSRIPGVTYQHPPCEEYHPKPAKLAGQVDDVD
ADDFKSKFDKDDFPEEEWGLAENELSELISDEESYHTFVVEYCEGEYGVNHEKWLGIDYM
LSRPFL
>d5c2a120-98a1-4815-8c8a-763411a6948c (mRNA) 346 residues [BFAB_07:1169476-1171755 - strand] [peptide] name=Bfab07g03170.1
MSDFPSNASTTSTEGTASTMENAKNAAYDSASAAANAVGNHPITQSVVNGPMADNVRDQH
QKTQVEFSNLANSRTTPTTQTATGQQLTHYHSFFYNLLSWENPRASGIAYLSTVAFIFAA
RYLDILRYSFKITYMTLFVTVLAEGLGKLAFSHGLTSQFRPKKYYTVSKETLDSLLGDVH
ELINFFVIESQRVLFAENVFVSLTALIGSFISYYLIKLIPFWGLSLIATSVLFISPLVYK
TNKELIDNTLAQISSIVNQQTEQVKQLASQHASHVAETTKQYAGEYAHKAQEMIGSARSR
SGSPEASRVASPTAKANGVKEEDFPTAPKEEFKSGIAAEEEPLIAA
>1239621f-a565-4896-9bbf-babca3290143 (mRNA) 272 residues [BFAB_07:1173387-1174720 - strand] [peptide] name=Bfab07g03180.1
MKILSILFTIDVSTLLTAILEFCFPLASFEDRVELGSYCEIFRSENYLMRLHRVFLFFFI
GNAFAAAIVERAKKTGCSLSASSCSTEKTSSTSSSSTTSPTFSSTSSASTIQTAGTLAAD
FAASATAATATCGAGFLPEAATNQARNVLQANTTSICATISPGWPCFGVGMASQDSISAL
NGAFRPTEYHGTLAFLCNLSEVPMTTAGLDINVLDDLIYMKHCANYTPAALMSPGEWIYG
YLDWNTVQTVGQSSELCTHVMSQVVAYPAPMP
>a9257639-9d70-48af-8f8f-51f8c115c71f (mRNA) 366 residues [BFAB_07:1175042-1176989 - strand] [peptide] name=Bfab07g03190.1
MAIPSSNNKTVLITGINGYIASVLGLHLLQAGYSVRGTTRRVSSAEPLLKGPYAPYIDRV
KIYEVPDMTISGAFDEAVQGVDGIFHTASPIDMKLDTYAQVVTPAIEGTKTALFSALKAG
PQLKAVVITSSIIAVFDPRTDDYTFTESDFASVFLAQAQEDLKESRPTRAGVLYGASKTA
AEEAVWKFRTERSPSFAIATINPAYVLGPPAYLPETGEKLNETLQPIYKILTGATETIPA
DAGSSSTVDVRDVADMHIWAYEHPEKSDGERYIACSGPGPAQGQADILREYFKEKGDEEA
LAKIVVGTPGKDYVGYNKETEKVESVEWLPGGVHISGEKAEREMGFKYRNLKESSIETAE
ALKPLL
>25d50f93-c3f3-4326-bcc6-1b2fa834e3ea (mRNA) 565 residues [BFAB_07:1177092-1179166 + strand] [peptide] name=Bfab07g03200.1
MSTTKFIPSRPLLRYLDEKISNTSVRPLCHLVTQQSSTNSLRRSILLRPPQQCRHIMLSR
IAERTRRGKLQADNHKILDYVKTSLFSQTDYQSQKIILWVEADKKPYSKPHKFIGVMTIG
DVMKGYLCNREESLLDPGEGTSWMLVPRTGFQNISRGERHELKGIAKRIGDLGATNLGEY
ILIKRKSFMVPKPGKAMKTKGGRGNAKLINLTKDVTGDNLSVMLAKAYYFLETRDYNAEF
HIHFSKNLKFSEDEMFQKMMEMPGGLALHPQVIQSQLPSSARINIKPWSNGRELVWVVGK
NASRQQEQLVLLARDNVIKMEGTHEFVIHRGKEMRKDRNWRLNEDKREIETLKKEGKSFD
HVLERQSKIKAREDSLKSMFKEAKLARRQKEKDRKARRIEERLKYQARGRAMLAGRLERK
RTLRTRWERRKQNLRATESERKERDAMRASFLARRRASKAELKAEAMIGTVKYYSRPAQT
AANSVEHKGSGVRKLRLIKFKETARDVANRTSLLRSPRPAAPNALRIKRQRSLSQRRATE
VKARRELELRRKRASPIRSKFEDMI
>b892bcd5-e30c-45ce-8ffe-7c52cad0a21b (mRNA) 640 residues [BFAB_07:1179190-1181747 + strand] [peptide] name=Bfab07g03210.1
MAEIGVIASGMGVASLGLQLMDGIRKLKQFWDEVKEAPEDIQYTLEELETSSLILSDIQT
SDSNMPSIPSATATRCLELCRRGTDILNTTVKDLNGAISKRRKIGSAKVVLKRDTLEKSR
NRLRDAQYMLMLSRQTYSDALQMEYHKLQIEAVQSNASRQLQEFEELKVSITRSANVMSR
TMLKSRDTVVYDFETKRLTRNRTRNKLDKQAKYFQRKFSIPQWFSSPNYTWDFSGYQAPS
GWTFNFRQYYTVDRLSSTWECVRKGDLSGLQVLLQNKKATPFDRLFSGETLLDLASSTGD
IDMCRLLLNQGANPNDSFATSALSYSINHSMVEWNSFSSMINVLQLLYPITEIHNPLEDI
RVLYEYDGLAWLLRHIDPTFKEWSFQERMMFALKICFRTVRVLDSTAEIVSLMLHKDQLS
EACRMTIRGHPTGIDCTFLFIELHCISRNMMDWLEENEESYMYSDSTQPRAGRPGFGTSD
RFSKTEFATSIQWLKRLVAAGSEIYRARFLYPLLTSSRWPAAPESRLLEIRAVSVRLWLE
ILYNSGIDLLKYGKLEHDHFIKSDGEWHSWAPEKNCVGRKGETSRGRVHLISFVYGPAID
DWKFCYSWSEPCRDYYESFRHFWEIVDRPERGMPGAWVEY
>6fde7f8b-ae8e-4e24-85d8-a6f64dc78f52 (mRNA) 179 residues [BFAB_07:1182910-1184204 - strand] [peptide] name=Bfab07g03220.1
MSSQSAEKIASIIERNLNYSKTVHVQPPLLSVGIEKNKSLGKRGTVLVSCADPRITPEKF
LGLEFAEAAIIRNAGGRARPALPSLLALDTLGNTGTIVVIHHTDCGVSHYSKSEFQDRSK
TKHPEIDLHGEEFGAIVDPEKTVKQDVEYLKSFESWGKANVEIVGLVLDTFSGVVKRVI
>129f4f83-d24b-4aab-821d-3299d1693f41 (mRNA) 325 residues [BFAB_07:1186003-1187281 - strand] [peptide] name=Bfab07g03240.1
MTDNVTTCLLSEHQDNKQSIFITMAPSSTVISKLKVQLKLSIARLRMVQQKDEAVSKQQR
RAMAQLLETGKIESAKIRVENIIRSDITTELHEILELYCELLLARTGLMESSVCDAGLEE
AVKSLIYAAPRTEIKELQQVRALLCEKYGKDFALQAMENSDEKVSEKVLKKLSVTPPAQE
LVNGYLEEIARTYGVDWPKRPREDLGQAPEFVDDDDDDENPTGGQAQKNLEAPLVANGKA
DEEREELSKATPPKNFGPSSPLRVNPPSPRTDNLHPRVRGALDLKPTKKMQAAAAPKAGI
QSKGPVGGTIPDVDELAARFAALKK
>b08b73e6-e112-4f14-b453-483f68c06546 (mRNA) 342 residues [BFAB_07:1184746-1186003 + strand] [peptide] name=Bfab07g03230.1
MASTKPLVLVIGGTGVQGMPVVEELAQDGAYNVRLVTRRADSPHAQELARLPGVTIVEGD
IYSEHDLYKFFSGCTHAFINTNGGAIGEKGEIYWGIRYYEIARTHKLQHFLYSSLEYSLK
ISDFDNDYRDGHMDAKAKVADWISVQDKEKMKWSVLTSCLYMEMLNELLAPHPDKDDPET
LAFIAPLGPKGSAPLIALEDFGKYARWVFDHPNRSNGLNLHVASQEVVWADIPAAFTEAT
GKKAVYRDVTVDGWFELGLFPDPDAKFGHSAPGDEGTLQTYRENFGGFWRFWKSGKVRKD
WALMDEILPGRIKSVGEWMRKSEYDGNIKPLLHDFHQKKRDA
>06b7ef4c-23c6-40dd-b39d-8f72f2a4cc83 (mRNA) 1247 residues [BFAB_07:1187488-1191709 + strand] [peptide] name=Bfab07g03250.1
MGKSIWSPSRWEEWAERRARAIWTNMQTNNLWQRMLKNTLATTICIILAIIPQVVAVFGK
AAYLAPITSVFGHPGRRFGMMAEALILALSGTMLGVAWSMLALYLSSLIYDSNPQAAFTI
RGIFLAIALFFHGVLRSHTPRLFLMVLLLVIVCVVSMTSTATAVSTLAVTQLVYPIVTAI
AVLLAVNTLVFPEFSSSFLGITTIETLGETVGALRDAGRYFIASAEGSEIAITDTKLENI
ISASGSGNGADLDRPPTLAERLPEKSNINHLTLSQRILSLFYKTEETPQPPPTDIDKGPQ
PVKLKSLTDKKAKLRAKLAGCKAAQQECNFELAWAVIPPRDVKPISDIEMKKLVANTIAL
ICACESKYALMGDDDDKKEVETKNGEQLKSVAEDAGIENPDTEDSSRAVTDMDTNDDSSS
DEKKPSKKERRKQKKKRRQDRKKVKSLIEKEMDNLELIKPRKEIEYGDIDLLKYLVQRIA
KPLSNLQENIDRSVDVVSSSLAYCYDVPKLPSGTRAPTGIRLEEIDIRVDILVDAIADFD
RTSASALENAAVLHDLGGPQVDLMPRMETFLISSFLLNLRQAALHTLGMLRHSRVLVERR
QERHDRKRIYLPQINWRKWLQSGGEADMLALPDSARKDARTGKKKDNDEGDAASIDSGET
LLAKKDVESATPKKEPPTPSSKATDKTVKRKKKGTRMFRLRNGLADVIEYLVGSDDISYA
FKLTVAVFLVTWPAFLVQWNTWYSLNRGLWAALQLVLITEVAIGTSVMTFMLRAVGTTIG
CVWGYAAFQARGGNRIVAVVMIVIGIIPSTYIQLGSKYIKAGMVTIISMSIVVLATEDHT
VPGSATENFLKRLIAFFIGGVVALIVEIALFPVKARDRLVESLACSIRQITEMEACLAYG
IETEINNVNVHSPAVISRFSIAKGKAEAALAAAETFLPFCANEPRLKGSFAPHALIYSEI
LYVLHAIVDRMENMLILRHEYGSGVLEELNAQVYPYRRNVAGSITLILFATHEALTTKLP
LPQFLPSARLAHLRMINRVREVVISSSGHVKESSHERSEIEVSMVKRFVRQKFLSWNAAS
AGQIEVIEYLEELIDLVKLLVGANEFRSGLLTRGSYREWVDKIQRPDTVESEMIPADGTV
EEAQPQMISNRKRRPTFSSTKEKIFGPSPGNATTARPDTARPGTGVKTVMMDKSELEKQK
KDMEEELPRVLQRVRTRRMSEMKGFGERKSKEDMNSGNAGKGKGRGK
>4a07f1cb-a029-474b-9159-33932bf57515 (mRNA) 675 residues [BFAB_07:1191739-1194134 - strand] [peptide] name=Bfab07g03260.1
MIFSYCSIILLLSTFVNTQSLSDEINSLPSCSDSCLDTATSSLGCSIGDYSCFCADESGN
SAQSSTVSNATTCIQDSCSLIDASTSLKVVGQICVLINDPTSSSSSSSTITSSASSSSTT
SSQSSTTSSSAVSSTSMASTSVTATATPIALASSPSSTSTSSSNSSGKGMSNVAKAMIIL
AVVALLLILAVCAGLLWKRRAHRKNSSERGKFKNLEEDEEMGKTPVELQGNDTQIFKWGG
IGVRKSFRVHTQRITSYMSPTSPKNRNRDESWGEPRGLLSTIDENLRGVGQGPEPVARIN
TTPVRWPSTSTANSPTSPEMTEPRGALFPPHHSRNNSNSRESMPPILPALDLPSITLSTT
SRPNTPHQPLPRTPSPPEVPVKTIARLDRPFSDFPHNMPPSPRTVGISYGALARSLSVAE
TPSSPRAPQTRSRHSISSIPNTPRTPTTTTEFAFPTSPPLQSPSAQSFHTFGARYSTHSQ
ASISTFQTFPTSPRDITDVPPLPNMPAIYPTSTHPPIPASRPTSESSRNQPGKYYHSKQT
SISKVKPKMIYLSNTPGISIVPSDSIFATPEPILRDPPSNNPFLTRNEDKASKPVISIKP
VIDRFDTISSCASQSSSGKPNLKPRVEEMFQEGAEKRRFQERQEERRMKRKERLMHGQGS
GDLGERVTSWYDATG
>07adb295-7d5c-4ada-890a-a748763427a3 (mRNA) 514 residues [BFAB_07:1196258-1198716 - strand] [peptide] name=Bfab07g03270.1
MYAPNYSFGQGNNTQSFNPNGGHPQAPQNVHQQGHQQPQHMMYNAQQYGPGGHQSPYGAS
GPGMAGNAGGMGMMQNSGLAHMAGGNVVPSYQTPYTSSPYGNNIATSSSVSHPTNFMPTA
SNAPPQYGMNPSAMIPQQQHQIQRMQPPPSSTPTPTSANSRVSPYGNFPQSTPPSASNAQ
FAVPPNLNQQHHQTPNNNQQGGMSLTPQTPSFPPGVRNSENAGAAMSTPLSPGSELREKE
RVTVLLDINREMLLEIMRIIALQTDLKNNKTEDPTEKATLDAEHKLLATEYMQCMRRLQS
NLAYLAAIADRSHKPAAQIPSHPAIMFAPTLTYKPAHTIPISAPTNDDDPASKPEEGHED
RREILKEAYERLQALYPGVDPKKDTPAGPPNAANRAQAQAQQHVNLMQVAGQKQGDMGQG
VQNMMGGQNGMAQGQGQGQMVQGGMGGMVGMGQMQQLQQQGQQNMGMPGLNQNQNQLQQQ
QQHQQKMQNEMMRQRMMQEAQKNQMMNMGQMPGR
>ae048635-e85e-4d16-beb0-d944d0323c78 (mRNA) 402 residues [BFAB_07:1199307-1200905 - strand] [peptide] name=Bfab07g03280.1
MGGWMDRYKGWEILVMSWLFSMWFALLFCLGIGITDKMRVSKYSVPLFTGYGLSTAMPDA
SKTDLASSTQKHGWIPRFENLVAFGDSYTDESRLSYFQTHNGSAPPPGTLLPSSNSTAGG
GVTWDRWVSNYSGAKLYDYAVAGAVCSNAIINRYLASISGPFPDVVYEVDAFTADVKYIN
SSTNTNTLYTNRKPDNTVYSMWIGTNDLGEGAFLTDSSLNGITIPDYVDCIFDRFDGIYQ
TGARYFVLMNNAPLQLTPLYGMPGAGGLNASHYWPNKPSNISEISGKMKEYTQLANSIFD
YRVPFEIVIKKRYPGASIAVFDTNSLLTDIYNNPTQYLPAPAVVDASYVLCAVSGSPCPK
QPGSLDGYMWYDELHPSQGTDKVIAQEFLNVVKGNSKYATYW
>8231acd9-6c92-4435-9065-f37a8d31b591 (mRNA) 437 residues [BFAB_07:1201538-1203582 - strand] [peptide] name=Bfab07g03290.1
MICTRVLNISRSVGLRLNQNAVARRAFTASTSLRANTLMETSGFSDTQLEVREAIAKLCS
KYPDEYWAKRDETGEYPHDLHRDLAKGGWIGIALPEELGGSGLGISEATMLLQTVSESGG
GMAAAQSIHANVYATQPVAKFATASQRQRMLPKLIDGTWRACFGVTEPNTGLDTLKLRTR
ARREGDTYKISGQKIWISSAQVATKMVLLARTTPLEEVKKPSEGLSLFFIDFDPKQPGLE
LKKIKKMGGRAIDANEVFFDNYIVNSDSLIGKEGQGFKIVLHGMNAERCLLAGEALGLGY
AALYRASQYAKERIVFGRPIGMNQGIQHPLADAYMHLEAAKLATYHAARLYDSSTTDETI
TQAAVGVACNSAKYLAAEAAFTACERSVLSLGGMGYAQEYHVERYLRECFVPRIAPVSRE
MIMNYVGEKVLGLPRSY
>88496e61-fee9-41d9-85f2-5a34a5948f70 (mRNA) 1364 residues [BFAB_07:1203994-1208839 + strand] [peptide] name=Bfab07g03300.1
MTAMRPNKRLPVGSKGWIEEERSNALELAATEAEEFTFAARNEIDWLNEHMAEIFNKNQV
NVAEIFKTPGKLRGKTPRTARKLNQLEVRAPLSDVFSATPQGAPSPFRQAHHERSPPKFR
VAEDAPAEPQEQSTQPQPTPSRPTPSHRPSSSGTAHSSVRRKSFINALDSGYYGSQLEEA
TQPNTQPTEPAPFATTPPRTLTPREDIIDSEGNEDIASNADSIEDEEGTPEDKKAPVEEI
PVTDLESEEKRTVEVSFQSARERSPIAATIEVEAQTETGTEAQQIEAVKQDREPKNEDQI
MGEVEYPNLELQPHDQSSVHSSPEKRPQHKSPSGSPAKAQSPSKEPSAEPQSSPFARQDD
RQDEDEQMDDIPDAQSASDGSSPIRPIFRKSSLNFASLPARDLSKKSLGHRTSRTSHYGR
PTGGKSLGNVKEDLANKNEDEMDVDEGVESTGREESEAETLLARIHNKTSTQRLQDQISK
LGQSQPTTRPASKSLVGGIIPSRQSIQATQPPTPQHKEEASPPSKDKSFATPGAFPEDED
SWIGPPTTALQEKSIFSPRPTISKNHTADVMESVRGKETVSGSEFNVPDNEDEGKQTSPI
RDTNVRGLTKSISTSFISSPKRAAGSQSPNKLISVSNPNLRINTIDEDSTTPPKSPPRTL
RGSPLKVAKDKFSSILKSGKTLFASSAAASAEAKIETLSSSTRIYQNNVPSFEDVLQNEN
NDAEVSYPKMDMRFNDSFPNRIQSPVKATTRKTRASTEKEEKRKEEAAREAREAKEAREA
QKMNDQLEKARMKVKEDARVYHQEQERAAAMQRELISRKEQEKQAKTSQVEVPKTTRSSP
RKTKAQLEAEAIASTASSANTSSGKDTDMTDAPASMPPPSIPRPKSQIGRPQAKRPLRPV
KDAAPKAKAPATVIRVDTGSSRGQQYHPSNTTLAATLEQSLQSSQGGHLRNKASSSSLQS
KSSNNSFKAQANKALEAAARKKEADELAAQQRRDAKLEMERQRAATKEEQRRQNELTIKR
DQERQREQQKEISLSEANKRAIERAKQKRAPPPAIRPQQNTDQWLEKSLPPVSLQRNDLG
GQAKAARMNTAKAPPKRPLLENNEEVARPPVQRNAPSNHGDPRTKRQRTNEYLDEEDELT
ESHPKMTAPPIRQSSIRPKEMPTKSLFASGYAHAPPPANLQRSTIVSQHQNKIGNPMDMT
QVSKGAIPFASSSNGQSYKTPARNVSHASAKAAKSAAKSSPRYENGENIVLPEIPSDSED
DDDEDDEKEKKAFQGLGWTDSPEIRKQLALQETIDPSKIFGRPQALNMEEVFDKSKDRFH
KFRARTSSANWSGSDRLTEEEVRKDLEGRDRVRRQGGWSYDPSF
>f05905fe-0343-4fa3-a142-78acb424d0ee (mRNA) 1041 residues [BFAB_07:1210019-1214851 + strand] [peptide] name=Bfab07g03310.2
MVKADFDRDYYADLEIEPSASINEIKKQFRKLALVYHPDRNLGKESDITAKFQAIQSAHE
VLTDPSERQRYDDARSRFRYTSASAFRSTKGNPYSNYGSEFPRPPKPPPYRPNRNPPPQS
AGAARYSTFTTPKQSPSAAAQEGAEARKSTFNAWESMKGHQKTPSSGYRTGSGPTWNTPK
AAPKEYTPQPSREESSFRGFNAPPRAKSGFEDFTSDPPRKPSNPPPTPKRNGFMPSNPGA
DEPSAGKGNYSTSRVNRSMPPPPPPRDSSSFEREREKEDVPPDAPPVNHNTRPSAKTNDP
LRQFRAEEESPYEPRISTPYANAGGEKFDPFDAANIARSKSTRENVVEPKSRKPVPRAGS
DPNLPSPRPNVTPKSSPPKTTHSFASSPDSSDSGNGPEINPQKPRVFAKPRKPAPAQEQK
QAEEQKQAQEQKQPDIAPPGTSNQNEIPAQEEPKQQPSMYDTSSKYPASDSKEPLHHVKH
ASFPGTPSRPPLFNSKSMQDAYKEKYPGSFTTPRERPTASPLSGGSPRPSEGSQPGNKDR
LHRNSDGFANKLNSFEAAQHNLVDRLVTNKERAQNSRQNGHVKPTKSVNHQAHNDKATYS
FKSTPAETSSFSKRPSFVTKSQSAFSVGDSRLNSLLLDKLNAHANSNSHDSFSMKLDDET
FSPTRPKINTTFSSEEWHGKFEAGGDYLVPERKSTQIPVSSHVRAQSASRPRGRSPVKSR
SADSNPFPASRVNSDTPIESPGGTKFSPEDWAEKFKPQTFAPPSIPSPTKPSLPTRIASR
RLRVPIAKPTVGSAAVVIEDDSADDKPLFTGRNLKPPKPPASPDAMDVDSPPPATPAPPP
QAPPPQAVPPQAVPPQAVPPQAAPPAAQSTQASPPKANVGLKINTDQLKRSAAPSHSPID
AEGLGVEFHDMKIQDLLSSLNLPKPPTVPKYTHESSTSLSQGIYLSAFTAYMGDWDVFAK
RMLLHLLARKNQNDGLGSNRWENPQGLDIYRRGLKEDGAVMSHWVAAMAIHDQAMKEFAI
HKERFNIAEGQERERPRKKTH
>760d7b64-386b-4d86-b041-c27a01a6afe4 (mRNA) 849 residues [BFAB_07:1210019-1214851 + strand] [peptide] name=Bfab07g03310.1
MVKADFDRDYYADLEIEPSASINEIKKQFRKLALVYHPDRNLGKESDITAKFQAIQSAHE
VLTDPSERQRYDDARSRFRYTSASAFRSTKGNPYSNYGSEFPRPPKPPPYRPNRNPPPQS
AGAARYSTFTTPKQSPSAAAQEGAEARKSTFNAWESMKGHQKTPSSGYRTGSGPTWNTPK
AAPKEYTPQPSREESSFRGFNAPPRAKSGFEDFTSDPPRKPSNPPPTPKRNGFMPSNPGA
DEPSAGKGNYSTSRVNRSMPPPPPPRDSSSFEREREKEDVPPDAPPVNHNTRPSAKTNDP
LRQFRAEEESPYEPRISTPYANAGGEKFDPFDAANIARSKSTRENVVEPKSRKPVPRAGS
DPNLPSPRPNVTPKSSPPKTTHSFASSPDSSDSGNGPEINPQKPRVFAKPRKPAPAQEQK
QAEEQKQAQEQKQPDIAPPGTSNQNEIPAQEEPKQQPSIFSMKLDDETFSPTRPKINTTF
SSEEWHGKFEAGGDYLVPERKSTQIPVSSHVRAQSASRPRGRSPVKSRSADSNPFPASRV
NSDTPIESPGGTKFSPEDWAEKFKPQTFAPPSIPSPTKPSLPTRIASRRLRVPIAKPTVG
SAAVVIEDDSADDKPLFTGRNLKPPKPPASPDAMDVDSPPPATPAPPPQAPPPQAVPPQA
VPPQAVPPQAAPPAAQSTQASPPKANVGLKINTDQLKRSAAPSHSPIDAEGLGVEFHDMK
IQDLLSSLNLPKPPTVPKYTHESSTSLSQGIYLSAFTAYMGDWDVFAKRMLLHLLARKNQ
NDGLGSNRWENPQGLDIYRRGLKEDGAVMSHWVAAMAIHDQAMKEFAIHKERFNIAEGQE
RERPRKKTH
>b55e346e-d299-485a-afab-26dafcce4d91 (mRNA) 1320 residues [BFAB_07:1218701-1222894 + strand] [peptide] name=Bfab07g03330.1
MSGHNIHETGNSANNQQQLQHAGTGRRDQLNRLNEQLATACDYIHANGRAQESFVIPPPP
SHQSNRGPFDTINNALNPRRREMNGRPMAPNNNQHGFQAPPASVSHPQSQMPVFDTQYPY
GEAPISLAESSQLPIHDMNNGEYTVNPQMLAQTPIEELLISNDQQLSQPFHHEHTINPQM
LVNDQVDGAPVNFAQSSQLPFHQMNNSEYTINPQMLALNQIAETPINYSQQSQLTINGNQ
HQALDFSHDFGGHQQFQMSTDYTDSVGCLNDPQMFAQNQIERTPINHGQQYQLPIYGNQH
QAQDFSHNFGQQQTQIQGQHTNDIGNSLDQQASVDYPFQNGSINFDQPLSVPIHATNNNG
HDISQRVPAHFQVAGTPAHSGQQPPQMPVNQTNFNAVKNNRQSIQAITTTRMSSFANLSA
EDQNAEFRHFFQQRLIQGDTTRMEFATFKSWYIGEQLDGKSKPTLAYGVAPLHKALRFAS
NVPNHQPMIPPDDQEHIQPSTMIYQGTGRELTTGFQYTMGSLPTLNGKAMRPNSEQYLQK
PRKSTKSNVPARRASKAVASAGQSPLPVSLPPMVQPVLPSTARAPAPAPTPSAVATPALP
STARAPAPDSTLSAVAIPTLPSTVRTPAPVSIPSAITIPALPSTTKAPTPTPTLSTITIP
TLPSTVRTPAPVSIPSAITIPALPSTTKAPTPTPTLSTITIPTLPSTTKTPTPDPTPSAI
EILVFPSTVKAPASAPTLSTMAMPALPSTTRAQAPTQLATATRRDQRLQSGNPQQMGIIT
SAKGKEVSREQRNEATSAAQPTTIRADQIRSLAGKYTISLSNLPEIIHYDEAFEDDIFHA
LDAAISAIDSKIAEGAGKAEMPRNNESRTMVEMALPAILQKSIARLSLENPSDARKSFEN
YAGNIGNSSGNSLPFAPESQFVKEETKVVGGTKQTVRLAKDGVPACATHTFRLDKIECGL
DGIEVKGSYSMYTKTTFTNATTPLKYAIGLEIRVAEIDNNRVRGGLLNYERPLPSNPAGV
PSWADILDLFKLQAAEWGLNTRIQGPPTSQTSTSTSLSNKQQNNTKKSEAKESDIEQQMP
FSRLVQGQGAKAGQPQQQKGRGDKRKRQHQPELHASPIISTSSSEDSSPSSDNSSQISNA
TTGTMSVSPRKVAEFSRLAENPPPPKRPKNGYRVGSLKRGTSMMSALSLMGQTPMNRISQ
NDHMHPARSLSESVRSPIATANATAAENHMPTQVAPLDSGLDVIQLHKLAMLQYVNNPRP
YEYPTSESPQPSRTLSTRSDIPTQIQARLLRPPTEAELAPHREQVLSVWKSSFPKEKKSS
>464bb8a1-17ce-4af6-b026-f32168134083 (mRNA) 1102 residues [BFAB_07:1225754-1229907 - strand] [peptide] name=Bfab07g03340.1
MSKNLYAQLRHDLANFVAHKFRPTSLATINCSLARQLLLHYTRNSPSLIPFALPTTYTRS
LSTSHYLRKYESINMIGTNGVATRSKRKSHPTGPERPQKQLRALNGKESTGVNTPEIDLS
DDEYDADGLQLLPSNVSPDTAEWQATIERVVRNVVSIRFCQTCSFDTDPALTSEATGFVV
DAERGYILTNRHVVGSGPFWGYCVFDNHEEVDAYPVYRDPVHDFGILRFDPKAIKYMPVT
ALGLRPDLAKVGSEIRVVGNDAGEKLSILSGVISRLDRNAPEYGDGYCDFNTNYIQAAAA
ASGGSSGSPVVNIDGYAVALQAGGRSDGAATDYFLPLDRPLRALQCVQEGKPITRGTIQC
QWLIKPFDECRRLGLTPDWEGIVRKGFPKETGMLVAEIVLPEGPSHKLIEEGDLLLKVNG
ELLTQFIRLDDILDSSVGQTVSFLIQRGGENIEVAVNVGDLHMITPDRFVSVAGGSFHDL
SYQQARLYGVACKGVFMCEASGSFRFEGTDNGWMIQTIDHKKTPDLNSFIEVMKKIPDRE
RVVVTYKHLRDLHTLNTGILQIDRHWSSKMRLAVRNDITGLWDFSDLADALPPTTPVARS
ANFIQLENSQHPAVADIVRSFVRVLCHMPVKLDGYPRNRKWGMGVVIDAEKGLVVISRAV
VPYDLCDISITIADSIIVEGKVVFLHPLQNYAIIQYDPSLVLAPVQSARLSNKQPSQGAS
TYFIGFNTNMRIVVAKTTITEITAVAIPANAASPRYRAINIDAITVDTSLSGQCGSGVLI
GEDGVVQALWLTYLGERSPSSSKDVEYYLGLATPTLLPVIERIQNEEKPRLRMLSVEFNT
IQMAQARVMGVSEEWIHKVAEDNRSRHQLFMVRKRTFERNSESGALLEGDIILSLNGKII
TRVNEFDVMYDHDVLDAVIVRDCKEMNLKLDTVSADDLETDRAISFCGAILHRPHHAVRQ
QISKLHSEVYVAARTRGSPSYQYNLTPTNFVTHVNGKPTPDLEAFLKVVIQIPDNTYFRI
KVVTFDNVPWVITMKKNDHYFPTTEWIKDPSEKSGWRRITYEMGHVVEGEGKEGIGSVVG
DDVGDFDIAGGSDDPMSFKSLL
>fdb2efa1-99fb-4495-a589-48792148c065 (mRNA) 176 residues [BFAB_07:1232200-1233056 - strand] [peptide] name=Bfab07g03350.1
MSTVDETLQLAAEAVPAAPTANEKANEKVKAPRNRTPSGKYGTRAGRDAIIVQFMFQAAG
KDFVPDFKTINGSGRSEKAVKHIWEALKKSYASANDVDAKDEAVAKGIAKKRKTELEGEG
EGVAKKKKKVAKNVAPEPETEENISDDIFSEVYRYDDIEWRHEGPAFPEYEFYFDY
>402b5988-6059-45fe-afc5-5ef8e0902451 (mRNA) 1023 residues [BFAB_07:1253926-1258621 - strand] [peptide] name=Bfab07g03380.1
MEPTLNRVEVEERVHQEGQAMQHDSMVTVRLSEPPILTLDTKRHSDKIITNEELETGEEI
ITPTDKRQTIMSIMDVTGKDTETGTLEDSPRITMVDPNGNEVPTPTGSESAESEQNGSRR
ASDSSDTSVEEVNWEELEKTEEQQPRNQESDGSTALLLARLEQENNAIASNPKSGIAKVQ
KVEKQRARAQSRPPSMQHLKKLVNGPTPSALRYSVTPPPPMTDLEFYAALVQDYPRTAQY
LPTLLSKKIRSGIPPPLRGVVWQSMSGARDRLLEEQFDRLCGESSPYEGIIGKDLGRSFP
GVEMFRDPEGDGQRMLGRVLKCFSLYDHKIGYCQGLGFLVGPLLMHMGDKQAFCVLVRLM
EHYDLRNCFLPDLSGLHVRIHQFRELLKLHLPALSTHLDVLQVEPAYVSQWFLSFFATTC
PLPMLFRIYDVIFAEGASETIMRVALSLMRKNETKILSCTEFEDVMQLLLSRGLWDVYHY
NADEFVNDFVSLTGIVTHESLQNLEAGYRESQIVDTAIPSDVGSAASRFLGRLWAGSNSS
TKSANLTPSPGLSAPSRPVSFLRRSPSKQSLASTLNSIEGSGSESMLSTSTDATSVSRDS
ATADGASIRAQSFASVSAAKTPVNKDKNLHTQIEDLLMALSEMQRDHAILATELQREREE
REEDRTAVQPLIDALRRKTSEEGVENSESDVSVETVKGMDAIAEEASLDGVSRDEQPTTS
NVVDESEINEATALPITTEDISSLLDIVEDRFLNPVENRRSSMMLTRSQLREELDRSKEQ
LLIEASRSQELSRRIVEQDQEISNLRDQIRETQAHVRNSHQDRQRLEKQVHDLRNSRKSA
QSTPDGSRDHEIEWGVKSATTGGLRELKLVRSNSNRSVATTYNKRSSSLISPQNLRENDN
PRASTSSEQQHSPREDVDSDALLLKLVQAKTAEAVAKQEAEESKLKLESLKKMLAGLQNA
ELPTTAFGHMTKPSLDRSMTTIPAKGTAPKIETPSAPASVPATASGGGFWGWGKKAAVST
EGK
>2e34a5e7-a32f-40f0-bfeb-a88f40431aa5 (mRNA) 1823 residues [BFAB_07:1260361-1266600 - strand] [peptide] name=Bfab07g03390.1
MDDDSMSDVPSFHMSDDESDNFAPAVKAKGKTTAKKPAAPKAKAKTTKEPKNPKAPKTTK
ATKTAKSVQTTLNMAPKKRARSGSDDEGQQSDNDSANDASQLSSTPPNAKKQKKAPAAKR
QATEALHDIENESILEIEPKPKKTKTSTEQYQKLTQLEHIIKRPDTYIGSVEKTEQTMWV
FNSENKEMELRKVTFVPGLYKIFDEIMVNAADNKQNDANMKNIKVVVDREKGEISVENDG
RGIPVEIHEKEKIYIPEMIFGHLLTGSNYDDDEAKTTGGRNGYGAKLCNIFSTEFTLETQ
DSNSGKRYKQTWTDNMSKMGKARISSSKNADFTRVTFTPDWTKFKMTGIDDDFEAMVKRR
VYDMAGTVKGVKVYLNGAQIKLDFKKYIEMYAKAINKERGLDDASANSVIVEDSKGHPKW
EVGFAVSDGSFQQVSFVNSIATTSGGTHVNYIADQICDKLLEVVKKRNPKGALLKANQVR
NHIFLFVNCLITNPAFTSQTKEQLTTRKPQFGSKCVLTEDFLKKIGKTEAVENILNFAAK
KADLELAKSDGNRRSRMNNPKLVDANLAGTKRGHECTLILTEGDSAKGLAVAGRAVLDPD
RIGVFPLRGKLLNVRDASHDQIAKNAEIQNIKQFLGLKHKTTYKDTLGLRYGHLMIMADQ
DHDGSHIKGLLINFLQVQYPSLLKLPEFFREFITPIVKVWKGPNPNKPTNLRSFFTMPEY
EEWKESNNNDKSWKHKYYKGLGTSKPEDAQIYFSNLDVHLREFETIKPEEEEMLDLAFSK
KKADSRKTWLGNFIPGTYLDHTDKMLTYDNFINKELILFSMADNMRSIPSVIDGLKPGQR
KVMYACFKRNLINDMKVVELAGYVSQISAYHHGEASMQMTIVGLAQNFVGSNNVNCLEPS
GNFGSRLQGGSDSASARYIFTRLSPFARRVYSALDDPVLEYNIDDGKSIEPVTYFPVVPM
VLINGAEGIGTGWSTNIPNYHPVEVVNNLKRRMGRLDDSGEEKPFETMMPWFRGWKGTPE
PAGPDRYKFNGIIRETGDTEVEITELPIRMWTDDFKAKLEEIIKAEKVPSFIKDYKEFND
HKNVHMIIQMDDKHMKEALKEGLAEKFKLNKTVATSNLVAFDHRGQIRKYDKVEDILEEF
YEQRLKMYTVRKAHWMKKLNVEYRKLTNQARFVTEIIENKLIVSKKKKPVLVAELRKRGY
EGFPKITDAKKAGEADDVVENEEEVTADEDAGARDYDYLLGLPIWSLTQERVDKLNKQMY
DKKDEIDTLDRLSEKDLWCEDLDAFVLEWEDQLRQDAEITKTIRNTNRRRSNKIGAGGKP
TGKGRLKKEDEEFTLGAKKKAPAKALKADPIKGVTKVQSKPHQGFMDMFTNKPKPKSAGR
FDGGDDSGMSDDDFAALAAPEADGPKLDAGTGRSKRAAASAPKKWIVDDDDENESDDDNL
LGDIDNMVKGIGGNDKQDTVTGNSRLSLFAMSTSNGDRPSSSTGLPKQKSKPSKVVDLSE
DETNYEMLARSSPQKPPAKDEVDGFLSSDDEVIPVASKKAPVQKAKATKETSKLKKAPVA
KKPAAEAESKPASHSPAAKAYAAKQNRLQQISKTIGYSDDNSDDEDMEEAPPLPAKPAAK
GRQASSKTTATKYALSDDSDEDVEMEDAAPPRKGANGKAASKPTYISDDEDESIAPPPKR
GAKPKAAPQKSALSDDEDDSIAPPPKRGAKPKAAPKKFVVSDDDEDESIAPPPKRSTTSK
PAPKKQVKPVVEDDEDDEEVELDSPPKPVARGGRGRPARQAAAAKPKKPVYTVDSDDEDD
DDVDDVDESALVEDDESEDDFSE
>10582398-fcef-40ed-8021-2ce3bdafcae1 (mRNA) 612 residues [BFAB_07:1269429-1272388 + strand] [peptide] name=Bfab07g03400.1
MLSVASLLNPAKSEPRSTRISSSPPSSLCTSSPSYGHTLLPIQSSSIKKQKMAKDGAVFA
KGAKIKGDVNFPPFEHLSEETMREVSKFQVYPLGKIQDYCRHIPYNSEKKNFLEKTGRES
FEVFQYIFKLPGEDRVYTVMWDYNVGLVRITPFFKCCKYSKTTPAKMLGLNPGLKEITHS
ITGGALAAQGYWMPYSCALAVCTTFCSHIAPALIPIFGPSFPSQCVSPDAPEHGRMIIDP
NIIHAATAEAESYRLQYTSFTPKSSTNVTPRDSVSPQQQSSNYLIRTNAMTPPTSSRSHL
ERRLRLKRPYGGESPYAESNTDHDAASETSSGDAAYFCSPVTPTSGHAGASWGIHARSYL
PNGPSHSLSNAMNHHQHQNINSHSANAGINISGMGMGMGGHGLGHNKGLHYGHTHNHKLM
NPHMSVNGAMVVGHNGTNPWLSAIPRSIRGLADMTASWRAKRRAEELDGNISDERDRERE
RDIHRSHPTDEEYDGEESASATGDEKSPIADDRTITFGPRAHVTNMTRNHQYNTMAREEI
SGEKITNAAGDEKKAAWLLMKLSVKDGEAGAALPSLPSVSAVGTPLMGSAKWIKDEGDSD
GPRVKRRRALSM
>ada3dd52-25c0-48ca-9c63-902d76cd50b6 (mRNA) 418 residues [BFAB_07:1272437-1273911 - strand] [peptide] name=Bfab07g03410.1
MKIEELPDDAQASAPAPVPGQDFDLLAQAMSSAFPGFAPSNSDPSSTTPSLPPSLASLRD
KSGPEILASLNSTPLFMTELEENDELEAFKALAYEGTPLEIASNFKEQGNDSFKEKRLAD
AKEFYTKGVNILLAEVRRRQRGEKRSGDVPEEKEDEIVEEVKILEVLLVNRAMAHLGLKN
YRSCVMDCGAVLRINNKNTKAFYRSAKALLALGRIKEADDACARGLELAADDKALLALAG
EIMKKNEEIEAKRKKEVERLVREKNIEKILKTSLAAREITLRMTDKPPEMEDAKIELVPD
PLDPINSTLSFPALLLYPLAAESDFIKSFNEMDTVGQHLEYILPLPWDVKGEYRDEKVVE
CYVEKKKGSLIKVGRKVTLLKVLNGGEVVDGVVSIYVVPKQKAAGWIEEWKRKNVVAK
>bfa74842-3bdf-465b-9b5b-c4af581c1859 (mRNA) 381 residues [BFAB_07:1274142-1276482 - strand] [peptide] name=Bfab07g03420.1
MALSKAQRLTVVICISTSFFLAELSIGFYTKSIALVADAFHYLNDLIGFMVALAALRVSQ
RSDSPDSLSFGWQRAELLGAFFNGCFLLALGVSITLQSIDRFVYLEKVKNPKLMLIIGCA
GLTLNIISAVFLHDHDHHGHHHGHHHSRGERPIPSTVDIEQMSSDTLCGNTVSTSSSNTS
KNLREDRHKGHCHMVQPSNAQSEPRDLAHLAVMLHVIMDAVNNIGVIIAALVIWRTKYDG
RFYADPGVSMGISLMLILSSFPIIKNAGAIMLQSVPSGININNVKHDIENIAGILSIHEL
HIWSLCQRKTVASAHIVTIETDLKAFMKQARLIRECLHAYGIHSVTLQAEASNGLIMNGT
GADEKCQMVCGSLCEDLACCS
>c7334a40-1e6d-4c34-9505-2f06c73ed397 (mRNA) 285 residues [BFAB_07:1288927-1290144 + strand] [peptide] name=Bfab07g03430.1
MSEESEKKEWHIKGSLDAELVVTPALPPDFHISLHTHDTSDGESTIVELKMGSHPAPKII
LYTSYASPWAHRSQIALAELGLEFETVIIDLTVPRTPEYLAINPGGLVPALSYNGEILTE
SGVISQFLVDSHPSHLEKTSREEGGALQRARYNFFIETYFSKVAPHVVKAGTAKTLEERE
QAASNVIDAIVKEIEPLVQNAAPFFGGSEKLTFVEVQVGPFLLRLLAFAKYDGLLPKSLL
TLEEKAPAFWKWASAVSNEKSVTYNWDEEAIAKRSLRRFEKIRAA
>c055d7a5-f0a1-4de2-92cf-e08a848c3b94 (mRNA) 190 residues [BFAB_07:1291140-1293434 + strand] [peptide] name=Bfab07g03440.1
MGKSQSKLSAEQITELQKSTHFDKKELQQWYKGFLKDCPSGMLTKEEFQKIYRQFFPFGD
PSSFADYVFNVFDSDKSGSIDFKEFICALSVTSRGKMEDKLDWAFQLYDIDGDGKISYEE
MLAIVEAIYKMVGSMVKLPPDEDTPEKRVKKIFRMMDKDENGSLDMEEFKEGSKRDETIV
SALSLYDGLV
>a4f3451f-8c63-4981-b0c6-8d1e9e3b442f (mRNA) 711 residues [BFAB_07:1293799-1296202 + strand] [peptide] name=Bfab07g03450.1
MSLSKPSIPVQRCPPNCRGCATFAAFGGGYFPPQTPGGALYQCYEYALALGLIEGPPSST
IENEDLVPAPLAIPAKSAKRPTGKPIALAAQSSPSPSFVPFPVAVSKAIRKKMEAIAAGP
YSFEEKVELMTLEAAKDPQSAVYMSILAKSHQNDSFAGPTMAQLDRDATSSLPLSVADVY
EETNATYPLGHSYLPPGIVPLPSDLLFTITTCGERCATSFVGMYAVRMRDAFQASGVDMR
AHEVKGEWEKTGAKRWLYSLGTDKDKEKVNKILRKGKDAVMAQEKRGVSTFKLLKEYENL
RQDIERERVKDMGVENPFRDVVKAIGDAQESDDGLQSEPNLLPGRTLLRAVEKVVRESFD
PIDWQGPDRDWPGADASISTLPPRQRPLQSCGINGLVSDDPDDESACTSFVQLKRTKPMD
FKWYSRSNEFEKPKYEWPQQVRCIMSNGTIRERSMGPFYGEISDRLSMLKQHTIKQNIAA
DNTLDFVNISWQFMAKAMNICDWYWDEEKRILVKGYSDHNDYKKDCDRIDRELDNWKATI
KEGMETPINSGDLSKKELRYATIGEHLLRQWKEGPGIMVSKTPSDKKMEGSLLAPHTTDN
ASHINYLNARIADAAKHRAEIESKWNHDTAPQDVFRARRELLAHIDVLEDLKIEIETLNR
QEETGQSPIFTDKKTRRELSLWERERSEEMRLWERKPGGENNRQSSDARTK
>67d0fc03-1df3-42d0-acc0-154f0e558cd7 (mRNA) 381 residues [BFAB_07:1296650-1298344 + strand] [peptide] name=Bfab07g03460.1
MNWFKQTLANVVGTEEPEYGSAGIRTVTAQAEKTPYTELTKNDLKWKALESTNVETQTFY
MISDEGKVASVQMIYNNVAGLRTTCQLNVKVFNHKGPKQSDHLWLSDALENYGFDEEMVS
FYADGLSIALNEAGDEYTIKAARNESGLVNLVFKRAAPGFQVGENGTTYYGTDPAAPWGE
MRHRFWPRCTVTGTITTPEKNYDFKGRGIFIHAIQGMKPHHAAAKWNFVTFQTPTYSAIM
MEFTTPASYGHTSVNVGGIVKDGEIVYAGATNTVKHTESKEDPETMWPEPISAEYKWEGK
SKSGEFSAILSGPLGERTDRVDILSHIPSFIKSVVGGVVGTRPFCYQWAIPPTNSLVLKI
KDGEAAVEEQGTLFGESTFIL
>0074fb81-20a4-4603-b0af-cb1631a064e9 (mRNA) 223 residues [BFAB_07:1298533-1299718 - strand] [peptide] name=Bfab07g03470.1
MTQPITLYSHITGPNPWKVSIILEELKIPYTTKFLDFSDLKKEPYETLNPNGRVPAITDP
NTSLTLWESGAIIEYLIDTYDQTTQLSYTSSPERYHTKQWLHFQMSGQGPYFGQAHWFTK
MHSEKVDSVIDRFLTQIKRVLYVLDRHLKGKEWLVGDKCTYADLSFVMWNEGIPWIFGDR
AGELEMEKDYPNFFAWHTRLMERPAVKKVFEDKAAATSGELPL
>4c060b24-1d98-41f3-a419-22df0ff0a0e8 (mRNA) 222 residues [BFAB_07:1300598-1301959 + strand] [peptide] name=Bfab07g03480.1
MIIRPASHRIRLTGFSFLRFQSRTMTSSTPPKTLIHFGKFEVTDQVFHKSSYCYCLVNIK
PILPGHVLVIPYQHHPRMTDLSRAELDDIFSTTQKVQKMLAAHYFPGQNLSEGSFNIAIQ
DGPESGQTVPHFHCHVIPRTKESATIGDGIYDKLQGEEGNVGGGLWDRAAQLGERPAQKG
KFPRVDDEDRLPRSAEVMNQEAALFREQMQKLGYSEMEQHDQ
>8cff2e4a-c4f5-450c-b6b3-65406726942e (mRNA) 588 residues [BFAB_07:1303597-1306473 - strand] [peptide] name=Bfab07g03490.1
MAGRKTKAAAAVTSPANVGVKRTTASRTSVPAPAKPSKVTKKPAKKVATTKAAAAKVAKA
AAAKPAPKKTAKKPVPKKSKVTSKPAPEEDAEMEDEEDVETAESDKEETPAPPKPVVSRK
RSRTQESESLPVAKKLKIGASINTPPTERLDVYVFGSGENNELGLGANKINGKAPTNVMR
PRYNPLLKGVTQVAVGGMHCVALTDDQRILTWGVSDGGSLGRDTSSYKAPAKDIDADSDS
EDEEDIVLNPLESTPTAISTEFLDGRKVVQVIACDSSSFVLTEDGYVYGWGSFVGNDGII
GFTAEGASMAAKERDGDLKKKFQIQAEPMLIPGLKNIKSLARGSNHVMALDNKGTVFTWG
ACEQNQLGRRVNNRFKFAALTPTPILKKCKSIAGGSFHSFAINTKDQVLSWGLNNYGQTG
IASNAGGDDAFIHNPTVVKGFEGFDVKQIKGCFQHTIACTEKQEVLVVGRCDEGQTGLDL
TSVDQDTVIVSPTTSKPAILKALTVVPGVKATFVAGAIDNSIVLTEDGKVWAWGYGENYR
IGLGSDDTVRTPTLIENSAIKGKKITFAGCGGQFSVIAGPEVTMSSDN
>1140a219-efa5-4b92-baa6-8ccf1d4107df (mRNA) 989 residues [BFAB_07:1307330-1313534 - strand] [peptide] name=Bfab07g03500.1
MNKLSNLGRDMRHWSGPGFGMSRQNQMNGMSSMPPHTKPTPSPALAPTPADSTIHYSFNI
PFASDLAGPNTEDILYATANAVLRWTHPKDAPDDIPVWKLPVHTSNIEILSKLCAAITNG
PLPILADVAVTTPKRPTASPAQVTTVTLSGSPELVHKSRETILNDTPIALRCAVIDVDGD
LIIDSAVPGLRQSVVEHLDKVAAFCGVDIFILGPKFPSLADGLSSNGEAGRDQRWRIAVY
GDMESAEHGKTRILVYIDRLLGRVADVASLELSLHTVICGRSRKNIKMIESSTNTAIYFP
PPFSQVYKYCPEGAQRRNPEEIFITGDRAENIAAAKSRIHELVRMTRLFMKDAHVTAAKI
DSILLTRMDKVRKIMETNGTFIQFPALASQRSMIRIQGIEGLHVERTVRELMLMGVQFYS
ASWWIQQPPNQPPLQPAPPQLRAMLVDICSYSSADVTYDKLQWTITGSDEAVKDALTIIS
NIPLNKRGFAYQIRVKLELANEHKEFVSGKKNGKINKIMGQSNVQIIFDGFNEYNFNIDV
CGNNYDQMVTGLNLVEQEMPAQISFHVPDQYHKRIIGIGGQHIQRIMKKHSVFVKFSNVM
DRGGPNREDDDIKADNVICRTPARNAQNLELVKAEILDMVDRVDSEFTSQTVNVDRLYHR
ELLTRLDQIEDLEKKWNCKVLFPSTEQASDDVTISGPEWQVPHCVDEFLGMVPDSHELVL
ARTPELLEFLSSNEFKTEMVPKLKSQYVVEVQVDENSSELTEDRKPTIILLWTFTRNNAG
GVRDAIEFLFSNIAAAGIEVTTVKGTIPRPKSDSFEESLPFFNSKLLQHAPAPMATDSPT
KSSFGDDVARERSNIFDKLRKPGSMSSISSFLNGRKNSSQSPAGSFFRNGSRNASRTSLI
SIESTRSFNADRNPWNDSGVNLPDDDTTPWPTRQFGTGSGSSHDNKHPHGHPGDATPRHS
MRASTDSGRPSTSNSTNSGYPGPIGPPRS
>48de24be-bfba-4e4d-8372-12712d9d6ac0 (mRNA) 873 residues [BFAB_07:1314115-1317756 - strand] [peptide] name=Bfab07g03510.1
MAQGAVAFVPTNGTNGVTLTTESIREIREYEKIISFRDAVLAGTHPRVKVPSHIVGVGKQ
SSLARNTSSPNTSAIRANAQAAIDSAPPSNSHSPVNYRAAGANSHIAKQSVSTISNKSVK
TSEINPILLEKSDDLIKAEIQLQRQRLERALREQMDQHRLAQKALLQTSESLPNFDLTEV
LQKALAIVHPATAPEVEPSVGAGSDSFDENSFYSSQHDTPEPSNSSHSHKPTLSGQVRGE
VSIEEPAAQTDPATNVEDNDVVMTGSLLSQNNHLESQTHSQSQYRPLGTQKNHSAEQQPQ
HDFRGKVAQEASHTKGVQRRVSGIVDLSQDSMSTGSESAGSQQNGDGLPKAKASEIDLQQ
PLNTRAHNLSPLAPQPARVSPLATARDPPILRDALPVNEAQQPQVAALRNAASGLSSAES
SPNGPKISEKKKGKKKKRKVNDNGQTDTPDSPYIKAEPRSPSPFAAVPLPRPQKRQRQSG
QYASELNYDEPRYEPVEVIPEAAPKRYEDVRAPVRYEGGYPDRYTEVRRPEPVYQRVERD
EVEYQRVDSGGQYTRRPASPVYALPYSRPIRESSHAIVDRQIIEEPRYYTERERPVLSRM
SVRPDADRERSRSPIMRERRSPIPMGPPRQPVRIIVDAYGREYIDPTPAPSIRQSVAPIA
RRHDDGELYYERAPVRTMSTRPPVETFEEDGVLYRRASPIVTAPRRVITQPEYAQPEYRS
YREREYSVRPTPMGPPGEEYVRVRAQPERRQASHYDEAPREYLSRPQSVRPEAIRYEVPR
EYVGRLSSVRPEAPREYASSVHPEVRREVMAPPRREFSVRPTEIITRSHQPTAAEGERYY
EVENQRPAIIERPRERESSVFIYADDVPRKVYR
>eaf0c1f6-d35b-48ba-bfd0-47e69cefa897 (mRNA) 201 residues [BFAB_07:1317820-1319090 + strand] [peptide] name=Bfab07g03520.1
MTDLIDVYFMKHLELSREDAYKLHQEYYQTYGLALEGLVRHHKIDALEYNRQVDDAVPLE
SILSVDTKLRKLLEEIDRSKVKLWLFTNAYVTHGKRVVRLLGVEDLFEGITYCDYAQEKM
ICKPYKESFEKAMSEAGVKEFKDCYFVDDSLINCEAAYKLGWTAAHLVEEGVKSPAKPVA
NFQISTLEELRTVYPQFFTTK
>41c45a3f-a3d6-4d7d-ae62-37af452309fd (mRNA) 201 residues [BFAB_07:1317820-1319090 + strand] [peptide] name=Bfab07g03520.2
MTDLIDVYFMKHLELSREDAYKLHQEYYQTYGLALEGLVRHHKIDALEYNRQVDDAVPLE
SILSVDTKLRKLLEEIDRSKVKLWLFTNAYVTHGKRVVRLLGVEDLFEGITYCDYAQEKM
ICKPYKESFEKAMSEAGVKEFKDCYFVDDSLINCEAAYKLGWTAAHLVEEGVKSPAKPVA
NFQISTLEELRTVYPQFFTTK
>99ae9e09-b92b-4769-be50-2c770e3c2623 (mRNA) 145 residues [BFAB_07:1319091-1320015 - strand] [peptide] name=Bfab07g03530.1
MADRLTQLQEAIDELALQFVASLVWVNKHHDYQTLSPTDMVRKDTKKDESGEALPNEDGL
EPLPADKFKEGQLELARDLIIKEQQIEVLISALPGLEDSETKQHQTILRLEQELKEEDER
RKEALKEKEAVLARLEGVIRSVRRP
>b274f740-5f82-4a44-89ce-6ea1d66c522c (mRNA) 235 residues [BFAB_07:1320180-1321131 + strand] [peptide] name=Bfab07g03540.1
MFLARSHLRFLRWGKQSSRRCFANSATVTASETNTEADDIAYPSLQSVEHHDLPSFLEYA
SRNNMDTGSTTYVGTHYEYMVKQALERLGMSLRQVGGRSDCGIDLLGTWSLPTAPQPLKV
LIQCKAFASKIKPAQARELEGTFVGAPQGWRTPGVMAFLVSQQPATKGVREALGRSQWPM
GYVLCGADGKVMQMLWNRKAADEGLGGLEVEMQYAGGDRNEKEVILTHKGTAIKN
>74c01cd0-3402-4464-9f51-642b3d136b1f (mRNA) 1107 residues [BFAB_07:1327156-1331022 - strand] [peptide] name=Bfab07g03560.1
MDFTSTPDLPPTSDPALLEDWEGSFDPLNLPSNNKSDEVEAIHLLEEETRLRKNREKEVI
QHRAWKVAEVFRSEADHIQESPVRITSLKQQHPFFLPSSPPNRKMPSVSSPIEYPQSSSP
PPMKRPHPVKASDLRKPLNVGGFLLDDGSDVEEDFEQPAAKRRMTEKPADPIIIPEEESQ
KDFANDCGIQPSRSGARQTVGGFMIDESDEENEEDSAVEVSRDAQLPKPAFEPPTNSTGS
NVNTSTLPAFLNNLTRKAGDIQTCSGKSFSINLKKKAAPISFEKMVAARSVTKAGKAKKS
YYGINISELVEEASKETKAKESRKVETENEIIPSIESLAVKKSRKTLMWTEKYRARHFME
LCGDDRTHRQVLRWLKAWDPIVFPKSGKPKAAPTKKFGEPDDEKPHRKILLLTGPPGLGK
TTLAHVCARQAGYEVMEINASDERSRDVVKGRIRTSVGTENVKTGSTVTSKSGHVSKNAH
PLCVVVDEVDGVVGGSGGSGEGGFIKALIDLVLLDQKNSSTVGTNTNYSKKKKGDDFRLL
RPLILVCNDVYHPSLRPLRNSSFAEIIHIRKPPLDAVVQRMQTVFEKEGVSCDSDAIRRL
CEATWGIGPMDTKKGAEGTGEGDLRSILVVGEWAAGKLRTEAKGERPRLTRKWVEQNMTG
DLSHGGGGSRAVGRGGIKEVVNRVFLEGAGFPRPTSFKNIVPDDAFNTEPKTQLGVAELA
RKAGMERLGSMIETSGDTDRIMTDIFGEYPNQPFNDDSILSKPDAAYEWLHFHDSCSSRV
FSGQEWELAGYLTQPVLAWHHLFASPARHYFRSDNQPNKKWSKNDEDAEPEAEPLPFTGP
RADFSAFEMEKLNRSTIQELQAQLDAKLLRSFRSCEDIAMDLLPYVVRMISPEVKPIIVG
GSGETKGIASVRKDSEKRMVKRAVDVMSEIGVMFERGRLEGSDAGAKWGASEWVYRMEPP
LDTLVTFLTSPIKNDATNVRYAVRQVLDQEYQKNIIVRENKARQARYKMGNVDGGDEEYS
FEKGKFGKGKSEKNVLGVGTGNEIKKDFFGRVLEDRVLGKNGNVGAGENRGGGEKKMPEK
KVWVTFHEGFSNAVRKPITIGELMRGL
>83c54909-15f9-4ccd-9774-05a350a27e56 (mRNA) 613 residues [BFAB_07:1331289-1334187 + strand] [peptide] name=Bfab07g03570.1
MDQRTVPIGPVGPNGPVSPAFVYNGTIAYASATSPAVTDTTFNASPVTSPLQRADGLTAE
PPKKRQKRNKPTLSCVECVERKTKCDRGRPNCLACIKRQSQCVYHLTANILEETNRTTAN
ARRMTKPPKKSGPGAGNLVERPRQAPDPSERSASRGSVSSSTGLLSNVPYSHPKASNVFG
IGSEHPFANYWTCQGGLPEVISVLPAKDQADILMERYFECVDPVYPMLHRQTFYADYEHF
WSLAGPERDRTDAALVAMIFSMIALGTQFVNNSPPKERQQTAEFYVSAAHQSLRLGSYLN
KASMRSIQAMVLITYFLINDNHASDGWAFAGILIRQSYAMGLHRDPNIVSPNASIFDKQQ
RRKLWQAVLLQDTFLTVLLSLPPSATHTDVNVEDLIDDSGSIANCDPNDTAYIRGCWTLA
NLVQESICSPRSLDLPICPTARQKHKLISDFKAVYRSFPDVFRSWDHDSISVVAETNKRL
VRQTLFLTSNYFHNVMLLHSSESPEVQPDVRGTLNAAHEAISAFFLLYELFESESKVWWV
FNHRAFLECMMIGNTLQEVGKDEDGAEKLGKDPLFVRAKADIVRMIEIMTNIGNGENGSQ
VARTRVQVLSDYV
>25f3f82a-2734-45ae-adad-2d5f88bc1330 (mRNA) 564 residues [BFAB_07:1335021-1338006 - strand] [peptide] name=Bfab07g03580.1
MADPRNATGGGRHLDATGDREVVYCHQCENEWYQDEHGLVCPACEGEIIEIVEPSSDPRS
GMGNSPDIAPLRDLDNHNPWADDSDPDEADIEEHITHGPNGSILISQTIRTSGPGPFEAN
RIINRRRRAPGGNGGDDGTVRDFQSMLGNLLGPNLREARAGRSGHDDLFPRAGEFHTGGG
GVGTGIGGRQGPHLVGGRYTFEGTLENGRLRPRDTNGPQGQGAPVEDLSTLISHLFSQIG
AGPAGAAGGDGEARRPGMPPPGAMGLPALLQSLFNHPNAAHGDAVYSQEAFDQIMSQLME
QHQQSNAPGPAPADAISSLPKKALDEKMLGPEGKGECSVCMDDVFISTEVVVLPCSHWFH
ESCANAWLSAHNTCPICRKGIGADEASASSPSNARRSSNSPTSQSPTSPTSRRARLSRFN
SEQNDRMARNEARLESIRNGRFMPPSGPSSSQRRETERQAERMTEDALAGNFFISPAAQS
ENMPGHFPDSNASTPPTLGRRDSGMSSGTNEYRRGFGSSTSSFPRDRPRSERSGSDGSTR
GDGTGNGGLSGWFRDRWGTGRRQE
>7ec4330e-303f-4fb7-9a02-0086b3f43ce7 (mRNA) 155 residues [BFAB_07:1338261-1339451 - strand] [peptide] name=Bfab07g03590.1
MSGGLPYAADAESPLKPAELQVLRAQYEKEGEHVGVQTQFNYAWGLIKSNSRHEQQEGVR
LLSDIFRTSPERRRECLYYLALGNYKLGNYSEARRYNDLLMEKEPENLQASSLKGLIDDK
VAKEGLIGVAILSGVAIAAGVVGSMLFRGVSRNNR
>5f6fb0a5-3251-4ee0-b832-b8eedc8313d0 (mRNA) 198 residues [BFAB_07:1339585-1340503 + strand] [peptide] name=Bfab07g03600.1
MLLDEDPATLIRHTLGNFNIVPDKSAVARINESLSTLQQARDLRVREAESALKKLSRNLN
TLNNNHLETVSAHSPTAHASEIATLDTQKFRIAKAASDLEIESERLSSQLADLQARLQEL
EQQGMEGGENVKRGQVDDEISLKLKVYRGLGIDIERDRESGEYSKAVIRNGKKGDVHVVN
MDNKFSKFFYANYFWQTL
>cf115433-7528-4319-8d8c-18f9ece63f18 (mRNA) 244 residues [BFAB_07:1340669-1341563 - strand] [peptide] name=Bfab07g03610.1
MKLFSAFYAVILPFLFFFTFPIAVFAALTTTFAFCVLCFRVIIVYIELALAVIPYYLYGP
RGEIKIARSKRAIYNPPNSPVRRRKRRSSASSSQSATGSNTPVPARVLKGSASVLGLGQS
VGPARDFEGVGGWRLGDSGSDDDALWTNMNSRLELPANHGRRHHQRSLTSGSIPSEESRS
RSPEAIMNSSKARTPPSIGSALGGETYFSTMTPNPRAKKGASFGSVSGSLASSKASSVVN
MKQI
>1d7f5cb3-1212-4082-9f69-2eb5799d4937 (mRNA) 385 residues [BFAB_07:1341843-1343229 + strand] [peptide] name=Bfab07g03620.1
MAENTGFPWHIGVYDAHCHPTDTMESIDSMPSMNARVLTVMATRAQDQELVAQVADKYGL
KKLQAKDHPNTECMIPCFGWHPWFSYQIFDDTKESLDFSLFNTEAFKIEHYGKVLTPSPD
DKQFLLSLPSPRPLTQFLRQTKEYLLQYPLALVGEIGLDKQFRLPGEWPGDVEKSRDGGP
TPGGREGRRLTPYRVQMSHQKVILKAQLKLAGEMQRSVSVHGVQAHGVLFDTLQETWKGH
ERQVISKREKKRIAGVPPALDDTDEEEDESENKIEKPFPPRICLHSYSGPPDTLKQYFHA
SVPAEIFFSFSAAINMSSPASAKAIEVIKAVPDDRVLVESDLHIAGETMDNLLEDMCRKI
CEIKGWDLEDGVTRLAENWKRFVSV
>2aa6bc8a-4241-4a1d-9a5b-0af5cc51fef5 (mRNA) 603 residues [BFAB_07:1344166-1347867 + strand] [peptide] name=Bfab07g03630.1
MAETSHRQTGSPSEDPSSPIITESQTPTSTDQPSTDNKLSEEQSNIDSCVIDMEQDHNVA
PLEEHSGGGFDPNGHYQDAYMSISKVTNGVANAQSQLDIPDTQSSSTGPNTRRNANKSGP
GDGDIHRLKSQFQQHNDIGDEGHNSVLGRRRKGPRRYPHLFEGNSDGGELNPMQPYEMTH
KAKGIANNFDSPSASRNVRRAATRHSNRQLGSRNGLRVQDQSQSDIDSGDDFDTVNDSRG
NNGGTSQQFQRVALTSGLPGPHFPIVPTAPVVKGRVVKQSMRRGDRPFANVSDNEDPALE
SSDCQDSDMDDDESYEQAICQDEDSHYSPEYDMPMAEDEEYDEEHDEHMFVSEPGPHRSN
RVEKNRAGVAYSSNIRPIANVTGSNVGSRAHPAVVRRRQEGRPSLFFNSSSENLAPSRYS
GAIMPWGINQQPLLIDQETVSDAHLKKRGLKRPPPGGKIGKRSYGANDPENIAIVNMKEN
QGMSFAEIAEHLNSEREKQGKKPDLSVCGVNGRYNRTAPILFATQGLKFVPLSERKKAKG
AAAHGKSTNKAGWTVEAENKLVDIVKQVDAEKWGHVAHLLNMELYSGRAVYDATTCARRY
AAL
>6e51ccb3-832a-4c21-9b95-7e1fc1b3d1eb (mRNA) 893 residues [BFAB_07:1348031-1351330 + strand] [peptide] name=Bfab07g03640.1
MSSTPSMSRSQTPLSKPRTSAPSSPPEEFEPEEFPEFNTKFATEEEKKIFEEEEKARIAN
SKAEDRRRKAIARKRAEHNESKGEREAKARQLDELLSKSAAFGEVLVGKTRVLGRVGSGM
DGKALGEHDLTMAEQPKCMVGGTMREYQLEGLTWMYEICIQGMSGILADEMGLGKTIQTI
SLIALLREKESYLGPHLIIAPLSTLSNWIEEFQKWTPDVPVLLYHGTPAQRKELLRTQMM
KHIKGGRPDEKFPVVCTSPEIVLRDHADLSKISWEFIIIDEGHRMKNSESKLFQILRTFT
SATRLLITGTPLQNNLKELWSLLNFLLPTIFTQWEMFESWFDFSDLQDEEGTEDFIADQM
KQDLVKKMHLILQPLLLRRVKADVEHMLPKKREYVLYAPMTKEQMELYNKIGDKTADLRK
YLEEKVVERLTGGKPIKKDSSKPAEATAKAEVDVEESDSEDEKPLAIRKKNKNVTSESTP
APKNAFQQMMAKRKPGRPPKNQNAVLLPAPSIKNAEPDRKRKPVEDSLQLPVNKSSKSSR
TASPAVSVRSRSSRSKRVYEEADASEDDYLSDDEFESKLATEYDKKEEAELKNKNRNEDE
TAKILELARKEISSKKLGNPVMQMRLVCNSPLNFYNPWSADSGIPFNETLVSSSGKMLLL
DRLLPSLFSRGHKVLIFSQFKTQLDILEDYARELRNWKVCRIDGSVAQDFRRQQIKEFNE
DPEFKLFLLSTRAGGQGINLASADTVILFDSDWNPQQDLQAQDRAHRIGQTKPVVVFRLA
TKGTVEEDLLMSADAKRRLEKLVIKKGGFKTMGQKMDTKEGMSADALRALLLKDGEVYTC
KEDDEILTEEDLDTLCDRSEAAYERAEKGLGNKDAFKIVETKAGGLMTSMESK
>c3ec16d4-d6ed-416a-994b-11ad65a035b3 (mRNA) 404 residues [BFAB_07:1353333-1354792 - strand] [peptide] name=Bfab07g03670.1
MSNKRIEQSEIEKYWEIFASLSNGGTHLTGAQAAPVLKNSQLRDEQLERIWDLADVDNDG
NLDFEEFCVAMRLIFDLVNGEYADVPPALPDWLVPESKAHLVQANRALTGRQVQFERVED
DDDTPGLKDGFDWYMSPSDKSKYEEIYSANRDGRGDITFESLDTLYSSLEVPDTDIRSAW
NLINPSAAPAISKDATLAFLHILNNRHEGYRIPRTIPPSLRASFEKNQIDYQIDNQRIAS
PAQKWGVTGGEETSTGRKAKFGETYMSRLGIGGKSSYRPAGTDFSGTKTTEDWEEVRLKK
QLAELEAKLEKVESASAARSGGRRDTKPALVKRELEQLLDYKRRELRDLESGEGKSKIGA
SLKGVADEIATVKEQVDALEAHLRTREQVLEGLQQEIENEKSSR
>310993d7-88d8-444b-9d00-d8063320963f (mRNA) 313 residues [BFAB_07:1355013-1356565 + strand] [peptide] name=Bfab07g03680.1
MAPPMLNGMDSSDSATTPAERYTTPTTLYSWRPPSPPHIHIPPLSGLDTSITLSKYRGLD
DEQETREILSVITQGQNVAVEKPDWKYEMRRHIQAILSFLYLGPSSGARDIETLRREGIT
MLLVIRDTKTALARILSGAKVAQQLGIEAGAIDVSGNMELIAAFPKAIQTINDHLIRVFR
HRNPQGVNSQTLAATPKVLLFCESGNERSAAVAVAYIMATYELGLIEAIQYVQNQRFCIA
FDDEMKHTLLNFNQLLEARRSVTQTRQAEATVSHKSKRRLELYDDDDDDGDVDMGQEDDR
DRFSGRTKFAPFM
>bf57cf92-8af0-40e9-980d-1e29bf6f3b91 (mRNA) 170 residues [BFAB_07:1358943-1359998 + strand] [peptide] name=Bfab07g03690.1
MSRPDIFYQPPKRESSALPHDPFKSFVIPRPIGWISTTSKSGQDNLALSHNSAVYLLTLQ
LSCSLAINPSTNVKVKIPSIMLKILENLFGTWLRMLIHSSLVLRVSPLYRSPSLTDPSYD
LRDSVNATALESWDDEFPLTKVTKVPSKVVNPPRVAESPAQFECKVHSIL
>835e705e-b682-454c-897b-a2f3adcaf254 (mRNA) 367 residues [BFAB_07:1361326-1362879 - strand] [peptide] name=Bfab07g03700.1
MPLVPTPSFKQRENFARIDDLTFIIDGKRCTIRPEHPIHFNRIKQEDSRQTAVERRKCRV
DRSTSHLPQLVRPFKDPPQCLFPPPLNPESTKGGDLFLGLPFNVRWMTYRHLSIVGKTPI
LIRSPLSSAYKKRHKPSNNSHAILRVSKAIRHDAAEYFYTNTNFAIGSPRWDQKPELEPS
PDGIQTFLSWTPRHYVNCITKLTILARLVVYFRKTEFTHADLTYFEAMMIATKESFVNLQ
VLSVMFTEFDGVCVPDSPLDVGIKTDGWLKTIYNSFKTVLQHQNLEELYLGVDLIGKPAR
YKGIPAWDQLPDRDALIFIKDVVKTTAMKHGSWVFHWEERWDSLFSQEEENEEEHWEMEL
CSISRKV
>6f60cc92-7239-48be-a658-c047c69e1539 (mRNA) 372 residues [BFAB_07:1363069-1364461 - strand] [peptide] name=Bfab07g03710.1
MIHMLQSKIQSKMSQNCSTHKKAITRSRNIAKQVAAKQIVSKQTSRKATKLRKKPEDSIS
KLRLLDLPLEIRQLIYKYILVKENRIEIVSPLDTLSRSHPERRKRKSSKGATALLEVNKA
IHHDAALYFYENNHFVIRISVDALHRLDAFTYTEKSITRANNHGLRCFLTRVPRFYVSCI
KELTILISFATTDPEYWPCDSISYHGSTSTAYVSGGVVRQFQYLTAVTLRRFSSLRVANI
IFSDADSEKEPTYSHQNTPKPWKLEESLFKSFHNLFQCENLERATLRMDLNGDSRSYLFC
PKHHPWSRGGFIFRIINASMERAMKNQDGDWEPTEDHGIEVVRVEVMTTAQTNCASLKGD
FGSIFQEEQKQI
>6affeccd-1408-427a-8b7e-c66aa8a513a7 (mRNA) 154 residues [BFAB_07:1365844-1366559 + strand] [peptide] name=Bfab07g03720.1
MATIYDEPTGCNCDNESTYDQSAIDAACKQALLLASEKKTVGKDKYPHAYNDYEKFTFIP
AAKKPYLEFPILSNGATYTGSDPASPGADRIVIGSIATDYKSAIFCAVITHDGSTKNGFT
ECTNTGDSGEGAYERRDREEEGKEGRELLERIDL
>cca9bb50-4725-41cf-989c-4f703199a550 (mRNA) 471 residues [BFAB_07:1366681-1368708 - strand] [peptide] name=Bfab07g03730.1
MASPDYPPGFGDGGVQGDSGADGWVGNALDSGTAGTGVGDMNAGPDMGNGNNKEGNNNGN
KGNGPPPRPQNASSPPSTTNPQANTCSYESAISTNTITTSTAATSSTSSTPPVPSTSSQP
SIPSISSVPPSVPSTPSASSTSSQPSTSSVPYTTLASSTSSQPSTSYISSTSINTNTTST
IDTSSSSPSSFSTAAPTITITSTSSNSSALLAPATSISSTSTTISSSTIAATPLSNTGAG
TQPVGVTSVPLVASTQHGLSKGSIAGITIGSLALLALILTAIWYFLRRKKNNKHHRKSIG
GFGVVEWSGGGNGGNMAQINESPSYNGNLTPGMGVQRISTWNTMRSLSGTHTRESSSISQ
FPSAPSSLSPSTVQNPFSDQTHFSSFSFPFTHSQQPESPHQSSSNATTNEEGPHEDIVDF
GDSIDWIRKRDRMRDRERSGLTGSNLGSSRMVEGKPDWRYSVRVNGGGNNL
>8f69b6be-3cb2-4ec9-a3dd-4e588ae21f98 (mRNA) 808 residues [BFAB_07:1369093-1372264 - strand] [peptide] name=Bfab07g03740.1
MVAKDPLQNWDPKFGRFHSIWAGEAATEWASKYGVLPEAMDPTQLFFPYKKSALTPHALD
NPRLKAERRNHQKWILSGYWPELLEEIGAYPYPLNYLPVLTNPIDPIFQLNQWQPPHTLE
TWPIIRMEFPPHKPFFPIEPDNTGLWTADNPAVWRRLDPILRLCTRLLHHSAATCWLDAF
YFGDRTDVPERLDRRPAWQKLEQGPLKFFHKRDPWLLNTAKTAEKTALLKTIMRKRVQFG
IGSSFLTLWDRRTPNRSGLGWEGFTIVSTERQSKNLEFYTENKAWIEIALELLLPLFRND
LSPIEKLSCQFYIASTLLHEFAHSLNQLQDSPMGRTIIRNEPAYGGDVKGNGAEVFCELG
YSFVKGLLGAMPKILNPGIIVGAPAVTLLLSKEIPARKYDKGIFLHEAGEHFAQYEATNK
LVPIVSKYYEYIHNDGFWDKVATNFGVSIIAPTPAPVVVVEPDPSRPELSTCVFNNSQRK
WMYEVQAIKSNAQLLSSLTPEQRKAYDVALVQKDDELNKLRKLKYLHVRDKTAKSVNECN
AALESFFTQSPGELSDSEILRLLGCFAETLKREADQETQCAIDFMAEAELETPFNVEFKQ
RLLDINRVARKMVGKVSADCERVGVATLGPDFHELRAKFDRTLYILRAINFILVQQVKAD
KNETYEEVIDRVGTAMDYEGLERLQSSDAQDEIVQSASQEAITAQAMNAYQKHDYVECHR
LGGVLLSQFDMEGYAQGIGMVLIAMHPGEIRRRWCARQGLHVLNIMVKSNANPFLELWVE
VATQVHDAIEDLAVNTGIGDTLCVLEID
>6b220079-fc3c-464a-9e55-b27b244dafe5 (mRNA) 292 residues [BFAB_07:1373245-1374803 - strand] [peptide] name=Bfab07g03750.1
MHFSKIIAAAFLAAPLVAGQSSGFGGAAPTGTGEIGSRPTGGAQPSGSADGFGGAAPSGG
FALASGRAGGHGHHSDGAQPTGSSNFGNGKAQQSGVAQASGKGGHKGGKGGKGGKGGKGG
ASGSGFGGASKTGSSGAKATGGAKASGHQRRQQSSAAFAPGGEMQQPTGSAGGSKPTGAR
PSGATQPSGEFGGHNGGHNGGHGHSSQGGASPTGAKFRNFRTKPSGTFSQGGARPTGGFG
GQQGGASPSGGFGGSQGGFPSSFPSGAAPSGFEGAAPSGFASGSAAAPQPTS
>15a54d40-7a78-4723-96d9-8102e718e7d2 (mRNA) 287 residues [BFAB_07:1377919-1379239 + strand] [peptide] name=Bfab07g03760.1
MAKSTQDNRAIRMLQAAEDGGYGVVGVVSYNLETITAIVRAAERKRSPAQILLFPWSLHY
SPLLIHLAAAACRTATVPIVLHMDHAQSEDEILAAADMGLFDSIMVDMSHYDKEENLAKT
TKLTKILQEKGIAVEAECGRINGGEDGVKDTGDLEGLLTTPEEALGFVETGVDFLAPAFG
NVHGNYGGVENIKLDFDRLEGIRKATNGRVRLVLHGTNTFPDDTMRGCIKGGMTRCNLND
LVLNTYNKYVAENTGKVPLTELMEKGTSLIQELIEHQMDIIGSTGKA
>9bf21b30-f94a-4216-ab04-ed57712ed5e1 (mRNA) 527 residues [BFAB_07:1383620-1385635 - strand] [peptide] name=Bfab07g03780.1
MPSAFFKNYRVYFLTAVAYMGSLLFGYDTGVMGSVLALKSFREDFGLPPDSTGFGGSKNA
QVASNVVSLLTAGCFFGSIAAAFCSDRFGRKLSLMGFSFVFLVGAAIQTSSSHSIGQIYA
GRVIAGLGVGGMSSITPVFVTENAPPAIRGRITGMFQEFLVLGSTFAYWLNYGVALHIPQ
STKQWRIPVAIQLIPGGFLLIGLFFLKESPRWLAKQGRYEEATASMAWTRCTTSEDEEIM
QEIAEIRTSIEEELAATEGLTWKECIAPANRFRFFSAFCLMFWQQFSGTNSIGYYAPQIF
QTIGISAANTALFATGIYGTVKVVTTAIFLLTGIDTLGRRKSLIFGAAWMMAMMFILSAV
LVTHPPDTKATSVAPASIAMVVIIYLFVIGYSASWGPIPWVYVSEIFPTRLRSYGVGLAA
STQWLCNFSITEITPIAVSNIGWRTFLMFGFFCLGMGVWSFFIIKETKGKTLEELDILFG
GVNADRRAQDVEAVLHSKKDIVHHEGDESVGSKAGTIRVEDSPEKST
>9ad2e925-6693-4be5-ac68-808be7e45c3a (mRNA) 163 residues [BFAB_07:1395770-1396863 + strand] [peptide] name=Bfab07g03800.1
MLSIAVQPPARVRPGSILYPPLIVQLSSEHDLYEHLAGYWTCVSLIHYATGQVIYEQMDG
KAADSAHPIAQARSRGVCDQAYFFFPDLAIHAPGRYRLRISLMRMDYSPESGPEGAVVCD
EQVDTRSITVEESGPNYSRPNSQERAFIRMLRDDGQDVPTPAH
>ff630510-5660-4424-af2f-affc98b42dcf (mRNA) 687 residues [BFAB_07:1397396-1399971 + strand] [peptide] name=Bfab07g03810.1
MSFVFSILRKNSRHCSKLISTSIQNTPRFKPHNNFNSFRTFSSTIYKMATTTSSSDFISE
KLKSLSVSDLPKFPNCHPDVNINDIYRAHITSHLAEITGVDSAIIYPALAWTNTLDKGDL
VLPVPALRVKGKKPNELAEEWAAKFPESPLVHKPTTNGVYLQFFFKADKLNELLIPTIIQ
QKTSFGQNKYLGLVDPEDPSKGQKKIVIEFSSPNIAKPFHAGHLRSTIIGGFLSNLYAAV
GWDVTRVNYLGDWGKQYGLLALGFDKYGDEEALKADPINHLFQIYVKINIDVKAEADKMA
ALEAEGKTDEALHIKNEGLDEQARRYFKAMTENDEKAIAQWARFRELSIKRYRETYARLN
IHFDDYSGESQVKAEAMEETGKKMEEMKIAEESQGAMIIDFTKHVAGKVGKGLGKAIVKR
RDGTALYLTRDISELLQRKEKYDFDQMIYVVATDQELHLQQLFKIIELLGYKELRDKCQH
INFGLVHGMSTRRGTVKFLDDILRDVAENMHEVMQKNEAKYEQIADPVATSDILGISSVM
VQDMSGKRVNGYTFNMETMTSFEGDTGPYLQYAHARLCSITRKAALTPEEIASADLSLLT
EVHAQNLIRTLSQYPDVVQNTVKTLEPTTILTYLFKMTHVLSSSYDHLRIMGSEKEVMKA
RMALYDAARVVLWNGMRILGLSPVERM
>ad78e2e2-fc3d-40ee-99f4-54787352e429 (mRNA) 330 residues [BFAB_07:1400248-1401883 + strand] [peptide] name=Bfab07g03820.1
MPTILITGASGFIGQLLATHLLTSHPTAPENKLILTDIITPSAPPSPHPQNTQCIQADLC
NADSLSSLLSSAGTVDTIFIFHGIMSSGSEQNFELGMKVNLHSTLSLFEGIRNTPSLKPE
GKLVRVIYASSLAVYGRPLPETITEDTHPTPEGSYGCQKLACETLLQDYIRRGFIEGLAL
RFPTISIRPGKPTQAASSFLSGMIREPMAGKECVVPIKDREFVSWMCSPRTLTENLIHAM
EMDLQGVDAHRRAVNLPGKGASVQEMLDALVKVGGEEKLGLVREEEEAATVRILRSWGVR
YDNAFAFALGFREDRGFEQAVRDYVEGLKG
>08e1e182-d9ea-432d-8885-d4ed828cc31f (mRNA) 688 residues [BFAB_07:1403873-1408024 + strand] [peptide] name=Bfab07g03830.2
MASSYNYSTSSSEVGTPYTPRSSSPTYSVASRSSSTTISKRISISTSRRNTAMNPIGGID
IAAIEAAMKQSSLDHLKGYSQTNHPTVTQSNDTEYISQESAQGYQVLREPAWNKGTFSSS
LSLSLAFPTPQISDSQKGTSFTPEDRVNKNLTGLIPHVLESLETQCIRAMRMINSRTTPI
DKYLYLSNIKAQNTDLFYRLLIDNIATLMPLVYTPTIGDVCLQYSTLYTRPEALYISIKQ
RKSMTTILRNWPYPNPSICVVTDGSRILGLGDLGVNGVGISIGKLALYTGAVGIHPSQTL
PIVLDCGTANEENLRDPLYLGLRMKRPGPEIEQQFMDEFMAAVKEVYPEMLVQFEDFESE
KAFKYLDRYKKEKMFNDDIQGTGAVVLAGYIGAVNLSGVPIEDQRLVFMGAGSAGVGVAK
QVMEYYTRRGLSEKDAREKFWLVDTKGLVTSDRGDKLAAHKKIFARDDNHGHQFATLEEV
IEYVKPTALIGLTATFGVFTESVVRALKGSVDAGGLGRRPILFPLSNPLTKAECTFEQAI
TWTEGTVIFASGSPFSPVTIKHSDSSSSSSSENSTTYYPNQGNNVYVFPGLGLGAILAKA
SRVTDAMVYQSAEALSGCLNREELMMGLIYPKIGRVRDASVVVAREVMKAARREGVSGLS
EECWAVWEEWGDVALENWIKKQVYDPRW
>395c8225-4162-44f1-8093-c0a97fe20e14 (mRNA) 665 residues [BFAB_07:1403873-1408024 + strand] [peptide] name=Bfab07g03830.1
MASSYNYSTSSSEVGTPYTPRSSSPTYSVASRSSSTTISKRISISTSRRNTAMNPIGGID
IAAIEAAMKQSSLDHLKGYSQTNHPTVTQSNDTEYISQESAQGYQVLREPAWNKGTSFTP
EDRVNKNLTGLIPHVLESLETQCIRAMRMINSRTTPIDKYLYLSNIKAQNTDLFYRLLID
NIATLMPLVYTPTIGDVCLQYSTLYTRPEALYISIKQRKSMTTILRNWPYPNPSICVVTD
GSRILGLGDLGVNGVGISIGKLALYTGAVGIHPSQTLPIVLDCGTANEENLRDPLYLGLR
MKRPGPEIEQQFMDEFMAAVKEVYPEMLVQFEDFESEKAFKYLDRYKKEKMFNDDIQGTG
AVVLAGYIGAVNLSGVPIEDQRLVFMGAGSAGVGVAKQVMEYYTRRGLSEKDAREKFWLV
DTKGLVTSDRGDKLAAHKKIFARDDNHGHQFATLEEVIEYVKPTALIGLTATFGVFTESV
VRALKGSVDAGGLGRRPILFPLSNPLTKAECTFEQAITWTEGTVIFASGSPFSPVTIKHS
DSSSSSSSENSTTYYPNQGNNVYVFPGLGLGAILAKASRVTDAMVYQSAEALSGCLNREE
LMMGLIYPKIGRVRDASVVVAREVMKAARREGVSGLSEECWAVWEEWGDVALENWIKKQV
YDPRW
>57218b53-2565-4a70-9359-5fab2a511729 (mRNA) 1412 residues [BFAB_07:1411756-1417137 + strand] [peptide] name=Bfab07g03840.1
MDQYFTNPMPLQRRLTKIYTDTKNIYDFIKEPVRNVEDHELQLLHRKLRIQQSRLVSWGL
EWSDPSQSPDIDESVSKAGLSEIVGNVMSTIKEILAEAEPLWQSSKRSTDERPSEKSEKS
ALIQWDKTRFEDLIRDLTMSIDTLYDLSKTRQTARTGLQTSEASSSKDKSSGFEERQFES
TRMSAPQQIDPATLIWTGNQIIATRGTSRSISNNTLRQIVLMRRSVNSSDLRQAIDQPPD
PIPVLVEYAPYDPIYSVTGITPSMTRFEKLFAGISQSYYSSDRLPVGLLRLIGYYEDAEH
SRFCLLFSLPTNFGPMDIQSPTLQMPIISSLSELLISPAFEPNLEVKYRLAYNIANAVFD
LHSKGIVHGNLLPSNVLFIEHPTPPRAFDLTQINMRQSYLGSFDLFSDTATDSGPSFDSV
SMLYKHPLDPRSTKYTNLSQESKSLDLYSLAMILIEIGLWGSLPELFPRASQVPPNPTEV
LKRLASRCGNIYVKAVKACLSAPEGELSRKARPDVMHQKVFWRVSKALNTCCSLDDVSDD
DSERSDEPSLVPTPVKIEAPSSSIKGYRERRDAKIDITAPQEPEINWGEKPIREKSPQKA
TVEWPEKKSSAIEPIKSKPKLKTFPAIRISQEHINLWHTNIMPHVNHVLRSFYKKYPESV
EISLESVGESSTKTKPTILVICTSVNKVRSILKKSLVYDKATYGLKVCRGKVVRARSGGV
KRSMAHGDELEAKNTEHQERPKNGASMGAFINDHHLPPVSFGGLVTVDNKPYGMSVHHML
DDPSDNEDEEQVQPSKPILRSSARPQALPQYLEMPDLTHSDTSYYSSGDEEYNYSFTDYS
SSGSSFDSDSSPYASEDEDDSDGEFPTLEPGDIPPIPVSSSNVHNYPITQPAIDDIDPDF
YPDPETRDEDHLDSCLLGSVYTSSGIRRLAHENITHEIDWCLFEFEEHRLPDISSSMSLK
VQPTGVVPLTDLPDLPVKCTARTSGTQTGRILPSMSILKIFGRKTPSMSWQVAGKIGVPG
DSGAWVLERGDDISTGPGNNSGRIAGSVLAWSQRRNVGYICPMWISILDMANSLKCDNIG
LPGIEIPIWSKVSTRKGRDTVSPVLRKAFSFTSDRNIGGWDSEDETHNLRDNQPQSGTYP
VVIDDDLADDEDELSGVLGNLKHVGSDHEFEYADHGEYDDDDESYDEEEEREYWSRFKAA
SVSPERVKGKGTDDEHQYRHELPGDEHQYPNEFANDEHQYRHEFANNEHHYRNDFAINEH
HYRNEFANEYDPNHQGIEYQHSLEKEVLISSEEEPELLATLGQPSRRGRGFGVRTFSGDK
SLEIDMMVGGLKGLSIEGNTMPGKNTVFSMDGSAIGDFTVGGAGEVDVGGSGQRRETRSR
GSGSAHSGTGSLGSLNGMVQGEGNRQRVRVRG
>fa7fd8ee-64bc-431f-9b90-08207a5d0ec4 (mRNA) 112 residues [BFAB_07:1420124-1420582 + strand] [peptide] name=Bfab07g03850.1
MQSPLSNSYRPAFAHCSDTTQRVNQALNFFARHNNFTKFPEGMECITSKAMKVTNDQAAA
GAWAMMSALLFIFLMIILNCNFKYMNWSGSDRNFEQEKEEKTPFLAQEEKSI
>cecced9a-fa7b-4cc8-8281-21ed3adf6844 (mRNA) 512 residues [BFAB_07:1423217-1425082 + strand] [peptide] name=Bfab07g03880.1
MSHIPDRHPYYNEGDSNESIERGNPDSSLRCPVFVQDTDEVVDEDGNVYLCWVDEKAWEE
EQKARQIAVLASRYASLSEALAESSNITPAVENLSTAMPIAITTANMSSVPSAAAETFSN
TPIADESDVHSKPEDNEGALNADTVEATPSISPNNTFISTFYQRILRIQLEGQWSVEGLA
DPVWDLVGKILFTTGLFMWWIFPEKLRDKLEARHADYLASGNEISSTVTEQKTRLAEDEN
VNLLGNDAAVPNQGDGTNNLEDSNYWDSLGDLDCLNHVDDYTIEAEEEADYSGGKRQLAY
LEDAQGKVLQVLFAVADICDQDLNSISDEYMDRLKEKVVRDARANQIFLQTPIILREWKD
ADAYDENGHRIFPDVLPGDDDGKNGEEDKDEDNGGSDGDDDDDGEEEEEEEEEEEEEEEE
EEEEEEDEEDDWGQPWGLPWRENRELRNVVEIDIPDPWEELFEFAEKCPRGIYVYRDIRR
DDIVGDPGISVFCCIEARRFCVRQMTLVPLKS
>f0fa9974-cade-40ff-a080-60f33d81ba5c (mRNA) 661 residues [BFAB_07:1432276-1435861 + strand] [peptide] name=Bfab07g03890.1
MGGPRAMYLEEEDEDTGKVLKGTRRSASVKAPSREKVKERPKITTRDRTSSKASRTNSDS
GYSTGAIPTGSEISSPDAVQDVEYTKESKKSRRPSTNQRRPSTVESRPPQTLKNKETKEH
RRSLSVKTDAKPEHYGVKTPVTSKHPQPPVITQPSTASVPMRPRALTHAQTYHGGQRPSS
YHAASASVSAAYPPLSSSAYFQPVHQSAQFQAPPPSPAFNNYAVVHPPQASSYFQSQEAQ
PSSRSLSARFEPQQRASQYGIRPEPVQTPRMITGGYEREYQYSEDDYDDSYESSNEEPIG
RTITSSIRVPSGIPSRTNSSAVSESNFSKADSSRSRESNYSEVESSYNKSKSSRGRRDSK
AMPPPPKPTLRRPTVNVPVYDDNLSQYSVEEYHEEPPRQAARPRRPSPHRNSVSYDVSEL
PRETERFRLETASKHRRRQSYYGQSTSASSTQASTTGSSGYSAKLSAAADYLEEVSGPTI
PLTAEALKKEQRRQAGGSSRSTKSSGSHDLSDYRGTQTTRTTRSGGDDNVTIEVTGQAKV
TVGGAEIQCEEGGKIQIHRTETIIRDGSEATASEYEHGYGLKLLDDRERRSRHDRSDSQS
GRSRMRSQHSYTRVSPRPQDRDRAPRERREDYEARTAKDYDSRNSNWESSTRESSTTSNW
F
>5c4b655d-9e07-4738-9b1e-a9be386956cc (mRNA) 188 residues [BFAB_07:1438982-1439849 - strand] [peptide] name=Bfab07g03900.1
MNVIAHFVRHENGAHKTQAFFTEQPSLIRDPDLTAEGLSNCKVFSKNFSDSGYVTHVWCS
PMTRTIRTALLSFESAIDRGVKVQALDLLQNWDSSPNGIGMDKEYLHKHFGEQVDFDKVE
EGWNDKSSGEWAPKSQEGKIAALKLALNNLRSATNIVEVVIVSHGSVPRELTNRGGKLRA
ESNQVCRS
>c1e199e7-83bc-42d9-9ef9-4671e44d7a01 (mRNA) 471 residues [BFAB_07:1440664-1442635 + strand] [peptide] name=Bfab07g03910.1
MPVISSYVSPLLKRNAVSSLSSSPDTASSTSNIIAKALTARDVGQTVDPSSGVTPFDTVP
NKFVFIVLGLIGAGFVITGIWFFFIAKNGGFVFHENDWDDYKSTVLRRKGPNGTTLSGGS
EATDLGGGSIVHGEKKRSTWGRKNKKSKRGGSGMERSRYKDYDEEESSLGTQSEVTYSEM
SEVNYPRKEKKHKKSRLRGGDLGDVPESEYGDDIADLRAYRHEKPARVGGMNRESESSMW
EGSTNHEGSTVSDGLIQNRERSPERAPERPKKSNNKDNYKIRKVIGTVQGPRAATSTKDA
GGSSTFWNRQNTTKKSSRQSDVGSSVTDDERIKAEAKKLQEKGRAAQRRDFSFRVGDDNS
SAAGSSLISSGDAAAIREQERREREARRARREARKKSRDQSHLAPPAYSAAESSVGGSEL
SSVREDSEVSGDTGHKSYPCFIPGLSSERGGNETDYTEDRRKKRNGGYRRE
>f1c3455d-0ada-45b1-93cf-6cfd67c0e04f (mRNA) 576 residues [BFAB_07:1442917-1445065 - strand] [peptide] name=Bfab07g03920.1
MADNNDIPTPVSAAAGQEPSHTYIPNQGYAHPAATSDAPPMTPTSGENTEYAADNEDDAY
DDLFDEEDDGYVDDVDYDPSSGDLTKSYNRQRKLNDATATGAPRINPQRPAANTKASVDD
QITSLSKHAAKIRLDGSFDGGHKTHGKDKSDRATSEQVLDPRTRMILLQMINRGIVSEVN
GCLSTGKEANVYGALSIPSTDSDSQPIHRAIKVYKTSILVFKDRDRYVTGEHRFRSGYNK
GNNRAMVKVWAEKEFRNLKRLHLAGIPCPEPVHLRLHVLVMGFLGDKKGWAAPRLRDVEL
SGDDVDEQYRLLYLQLIGLMRRMYQTCKLVHADLSEYNVLYHQKKLFIIDVSQSVEHDHP
RSLEFLRMDIKNVSDFFKRKNVEVLSEQTIYQFITFHDGPTQEPGLSEALEKLLLERPEE
DETEEAVAKRQVENEVYRQQYIPQTLEQVYDFERDAEKVGKGERGDLVYRNLLAADKMPM
SSGNEADAEDTMGDGTSQASDDDEDGEGDEDGEDGDDDDDEKRFEKGTPRGKRFEDKDAK
KEHKKAVKEEKREKRKDKIPKHLKKKLVSSTAKHKH
>49e3a3c8-94e6-499e-8201-89983774f092 (mRNA) 1227 residues [BFAB_07:1445215-1449489 + strand] [peptide] name=Bfab07g03930.1
MVYIKQINIQGFKSYKDQTLIDEFSPATNVIVGRNGSGKSNFFAAIRFVLSDAYTQMGRE
ERQALLHEGSGSAVMSAYVEIIFDNSDGRFPTGKNELYLRRTIGLKKDEYSLDKKNATKT
DVLNLLETAGFSRSNPYYIVPQGRVTALTNMKDGERLNLLKEVAGTQVYEQRRTESLKIM
TDTNNKRAKIDELLEYIKERLAELEEEKEELRGYQEKDKDRRCLQYAFFHQEQVAIAEKL
EEIDEFRQGGGDGDENRDAFMEGEKAIAQLDTQIKQLTRQMELLRVDRRQLEEDRRDTAK
ARAKIELDVKTLTANQSSTEQSRVRHQQELNSVKEEIASKEAELAQLLPDFTSRKASEAE
VKRNLDEAEAGRNRLYAKQARSNQFRTKAERDQFLRKEIEELNSTIGSQKANRIDGDEEV
NNVQYEIRNLETEISGLQERLDGWSGNRIALAEEVSTAKESLEKLQDERKLLRREDEKLH
SVIEDARKEVLQAESELAKTMDSATSRGLATVRRLKKQHNIQGAYGTLAELLEVEDIYRV
AVEQTAGSSLFNYVVDNEETATQLINALNADKGGRLTFVPLSQLRFKPGNLPNASDAIPM
LSKIRYDKKYQPAFEQVFGKTIVCPNLTIAAQYARSHGCNAITPDGDTTNRKGALTGGYL
NPKESRLQAVRALTKWRDEYETLKVRQDEIRKEIEQKDQEITAAYTEEQKASQKEHKFVD
SLDPLKSGLRSKQAHRERQIAQLEQLLRNQADVLKLLKDHAAKIADYEAEIASDFKKALS
ANEERQLEQLNASVQDLQKQWNEHSRSRRDLESRKQMIEVDLRENLRLRLDQLNSQEFDL
ATGSGSGNLKESQRELKRITKASSVVESKLKENEKQLEEAESNINNLEQERNRQEDEQNK
VAALIEKHQKRMEKSIARKAILTTSAADCAKNIRDLGVLPDEAFEKYKDYDPKSIQSRLK
KVQEALKKYKHVNKKAFEQYNQFTTQRDSLTKRRKELDDSQSSIQELVEVLDQRKDEAIE
RTFKQVSKEFAQIFERLVPAGRGRLVIQRKTDRRVREEEDSDEEARDSVENYVGVGISVS
FNSKHDDQQRIQQLSGGQKSLCALALVFAIQQCDPAPFYLFDEIDANLDAQYRTAVAQML
KEISAKQSQASQSQDNSDEESDNEEDDEGGSKKQKVMGGQFICTTFRPEMVLVANKCYGV
TFHNKTSGIGVVGKEDALSFVDGEAPK
>f76efcd0-7699-4ba6-b39f-d3fdf2188d5e (mRNA) 1523 residues [BFAB_07:1451226-1456896 - strand] [peptide] name=Bfab07g03940.1
MSIMELDDTWDPDPLPSGSSRNQSQPRFKREISHHSKAQPDPQHQYYEQPKISHSQLRDR
IAPMKLYQDFSDDGSSSDEYPVVLQQPQINDKRVTSPAQPAKDRRKRHQSEHPSRIEHGR
TTNVEEVIYDHISAIPRSRNESVARNDARYKSVANDVFEEYESFKNTSAVSRKSVARSHS
LATDLYEDQGYVTMKDYNRQFDKEPSVFSPNNAQTKRRMREESTYGSMSSGTDAHRPAGR
SRQENSKANRELVGAPQKKQRRSYSRAQSLAPRISNDNRDVQYLGTENGMYSVRIQKQGN
KPQLRSPLWPSFESAVPKPYSANRLQGRIDKSASMKPLQHTPNNQPVRIRSVASDRIQNH
SSQARMVDYGLIDDDDVYDTPLENDLRRRSKSQVRAHNAPMNFINALPKSSVFRRKNSEV
AEEVHQTPSRGSNRSHNSGVTIDLVTPESTVYARSSMPFIPQHWTPTRRGPMKASAPMEI
SEKDGLGTKTGQQPGQNAHQHQFIKSSPNNGQQTEENVRQRQAAEKIIRQELNADNEALQ
AELFGEVIGETEEEKREREEAKRLEAQRVREEKEKQDLIDAERKRKKNEARAKKENERKA
AGQAEKEKEAAAKKAKRDAERHHQSLKEQQNADERRKAANKLLQEKKERDLAASKVIEEN
IQAAEKERKENEAKFERMKRQLEKLEAQVKAKSIAELKPARKSTALDGTSNRVNSQPPQV
SLSTSMEIDDENSLPTTQIQITPVNGTDTSHTASTSSPQATSPIITEVEDEDSLFVSDNR
KTVVEATPEQQISNDLQNFTGSFSSDSTVVQSIEHDRPPNSITEIFAKTIHNPSGDKTLE
DRDAEREAVRKKRAKENAAAKQKRANSIPAEPNPKIFAQKVAPREVSKAPSKSTPKKKRI
QPLTKALGDSIFSVKLQPLAGHEPEGYVPREQPEGFQNFTENSSTDLTVLKPRPLPLTLP
PPLPPPVAFTTTSIRPETRLISQAEREEIEANRQRVQAAAQARKENSNRARLEGRKAASA
KKRTVEYRKRKEKELIEEAHKEGRILGNSELEARLDKLMEKREREQKRKKNRAGEKASFN
EHEHEPLSRINILNHSSMHAAQISSSDTASDSNQIEEDDDPPALALKEHKIKTAEIMKER
AQLHAVQRAQPQPKKKLEPIFDSDESEESVEDPMDEETTEMYIEHARKNNTEAKEDVEKS
DVVQSETRTEEDIAFEKEIKDFLEDPNFEGEAQEATTTLNPDEHSAQIVPPMPNMTRYFE
GQSAPRSSSNLETQSTLLAGPIQMAKTIPPKPQQPASYEMVNLYMVMTQVTLHEFEDEAI
LKKKFLDIEKANKYAQMLVNEHRNKMFRQREILERWDSDRMYHGRIIHDKQKTTKVFVKF
KPMNTEDIDKYNPTLVRPMFANQYYMVRFEKVVEEIDPETQKVCMKNHTIGFADASKLYT
VLEMANHAASEYLLKEIKPKEEVEEHHTIYEQILLPEVRAGRDEVNRTDQMFNCELTCEE
APWADFKSFEVGVEMYKTEGPVN
>cfe792a3-a949-4351-92d5-cdaa0083fb42 (mRNA) 607 residues [BFAB_07:1458926-1461058 - strand] [peptide] name=Bfab07g03950.1
MKRKLDANDVPVPTEGSDAIKENVTFASLGLDARLLQGIAKQNFQSPTLVQSKAIPLTLE
GRDILARAKTGSGKTAAYLLPILHSILKRKELSSTQCTTALILVPTRELADQVYKTVESF
TAFCAKDVRAVNLTQRVSDAVQRSLLADSPDIVIATPARASLNANTSALSLANLTHMVID
EADLVLSYGYDEDLQNVAKIMPKGVQTVLMSATLTSEVETLKGLFCRNPEVLKLEEAEDE
GEGVSQFVVKCAEDEKFLLTYVIFKLKLIKGKCIIFVGDIDRCYRLKLFLEQFGTRSCIL
NSQLPVNSRIHVVEEFNKNVYDIIIASDEHEVLGDEDEPKSGDAEEVEADDADEEKEVAK
DAKKETKQPSKKKQKTGKKDKEYGVSRGIDFKNVACVLNFDLPTSSKSYTHRIGRTARAG
QTGMALSFVIPSEQYRKHKPTSIESAKNDEKVLAKIVKHQAKKGKEVKPYNFDMKQVDAF
RYRMGDALRAVTSIAVQEAKTREIRQELMKSDKLKRHFEENPGDLYHLRHDGELRPARVQ
AHLKHVPDYLLPKEGKKGITGGDVGFVGMHKTTENRIRKARAANKAKGRGKGRKSDPLKT
FKAKSKK
>97b355bd-a8c4-45e9-bef1-f8c08924bc9d (mRNA) 106 residues [BFAB_07:1461386-1462478 - strand] [peptide] name=Bfab07g03960.1
MSSTAPQPTKTGLKDFTIPSSVESTSSPYQLNYIRFYSPTKNSRSPSSYALGYRPRWGSG
PMDASTTIYIGCAPGTTGRLEGKPYRKTNIAAEKEQNRWKEQMYIG
>08fd90ac-1f55-4162-9c4b-f1aa1f36fc33 (mRNA) 303 residues [BFAB_07:1463301-1464703 + strand] [peptide] name=Bfab07g03970.1
MIEELLFEVLCCRHKDGGGHSQMERVKRDWWSKIEMEQAAIRNDGGQQPAQIIQRRREYR
PFANVEPAAAEWALQLLEVNFMGIAGRIQVLEERIARDGAERAELMVRAEERRRLYERIR
EEERRAREREMREAAMRQREEERRREAERMQREREMREAERIQRERQLEANRIREEREEL
MRMDREFAFRLAREEEEGEEAQQRADRRALWRVENRWQAQILYPVAAPQLFWPRPAQREV
RRRPLGDCYSCLELIRRNEDVDWCRAECGKNICHGCLEDWRRNHVGRQLTCGFCRAVWKF
EDA
>18eb09f3-d344-4f99-aef5-cd739dac753d (mRNA) 412 residues [BFAB_07:1467666-1470106 + strand] [peptide] name=Bfab07g03980.1
MFSKASIVAFALATVSNAHMIMTSPIPYGVDSLNSSPLALDGSDFPCKQRTGVYEVTTQN
TMDLGGSYDLAFKGSAVHGGGSCQVSITYDENPTASSTFKVIHSIIGGCPMKNVAGNNGD
NANAIDPDTYNFTIPTTLPTGKATLAWTWFNKVGNREMYMNCAPVTLTGGSSKRSDLIAR
DQAAFNALPDMFTANIDNGGCSTKDSTDLVFPNPGDSVDYDEGSTTATAGPTGSCATAAG
GAATAKPTGTGTGSGATSAAAPYGTAPASTASSLPGGVFVSIATGTGAATSAATLAATSA
AGAVPTVATTAVSVPTTPTSVTSAVAPAGTGSSSTSSSGALTGACTSEGMFNCISGTSYQ
QCGSGTWSVVMQMASGTTCTSGQTMNMVIAKRNGMGLMRHVARRGLGPEMFN
>8bcdbe7b-8ae1-4c48-aff8-aacd71eef6de (mRNA) 288 residues [BFAB_07:1471011-1472097 - strand] [peptide] name=Bfab07g03990.1
MSEDLLNEIEAINSIYDSSTLTSAHETPDEIYVLALPNQATSLRIQFPAAYPDVPPIILG
AQSSGENARKGDAGKLADFVRDIVGRTWKVGEVCLFDVIEEVEERFGAGDEEGDGGDEEG
DEFADDEEGTVVERRRDPSSGDINIDIEPPNWTLSSVTTELKSTFIARCIPVSSPTLAAQ
YIQNLLASDKKVRSATHNITAWRIKTPEGITYQDCDDDGESAAGGRVLHLMQLMDLWNVM
VVVTRWYGGQKLGARRFAVINAVARDAFVRGGFVVEKGDGKEGKKGKK
>72d862a5-5467-400a-bd4e-3d773338023e (mRNA) 846 residues [BFAB_07:1472727-1476038 + strand] [peptide] name=Bfab07g04000.1
MAFFNGPYLAVFSTIFCLVAGQNGTTNSTTYDVLDYVDQLIGSSNGGNVFPGATVPFGMA
KAVADTNSGSNQGGFTTDGSNITGFSSMHDSGTGGSPSLGNFALFPYAGCKGDAVDGCTY
PKKSRATPFVADSVKASPGYFGLTLSSGVAVDMTTTQHTSLFRFKFPATSDGNASSPLIL
MDLTDLSDSRQDNASVSVDAATGRMTGNGKFLPSFGSGNYVLYFCADFSGASIRDNGIFV
NSRASADVKDLKISRSINGYPLPGGAFVRFQSPGDGILARVGVSYISSDQACANAEAEIP
DFDFAAVQSAAETTWRNKISPIRVSTKGIDSSILKNFYSGIYRTMVNPQDYTGENPLWQS
DEPYFDSFYCIWDLFRSQTPFLTVLDPSTVARMVRSLIDTYVHEGWLPDCRMSLCKGFTQ
GGSNADNILADVYIKGITEGIDWDLGYEAVVKDAEVEPYDWSSEGRGGLDSWKALGYIPV
QDFDYKGFGTMTRSVSRTLEYSYNDFVIASIGSGLGGRESDVQKYLERSKNWQNLYNGAQ
PSYLTNGTDTGFKGFFQPKYLNQTWGLQDPLKCSNIDYNPNSVCSLQNSGAETFESSIWE
YSFFVPHDQASLITTFGGPAAFVKRLDYLHDNNITYIGNEPAFLTVYQYHYAGRPALSAR
RSHFYIPSFFAPTNDGLPGNDDSGAMGSFVAFSMMGLFPNPGQDVYLIIPPYFESASITS
PLTNKTATIRNINFDPSYKNIYIQSATLNGKPYTKNWIDHSFFTEGKELILVLGSSESSW
GTQVSDLPPSLGEYVGFNGTGNNTASGQPITGLAGRAVLFDKRVVPASRNELGANTRGSY
WAEVAG
>24809d5c-7af7-4c8f-9c92-461cf5f9a712 (mRNA) 368 residues [BFAB_07:1481547-1483125 + strand] [peptide] name=Bfab07g04020.1
MSNSTNLSPAYLAENRSSRLIISNSIFFGLAAINVLLRFVARKLKNISWGVDDYLIALAL
IWVTGLYIISIFSVKYGVGRHIEVVAEDKVQQIFKLIYVMQIFYVLAPATIKLSILFLYK
RIFVSERFIHIVCAYIIVISVWVTIMLFMVIFNCSPISAFWTYDGKCFNFERLTIGYAIV
NILTDMSICILPLPKIWKLQLPIGQKIAIMLIFMLGLFEIAAALMRLVYAICFIDSSDAT
WDYTIGNIWSVIEPAIGIVCACLPTTRVVLLAILPASWCSVFSIKLCPSKTDTSGRETGD
WPRIATYSEIQIGSQIRLSKKDHSDVGSENALELRDVNGLEQQESGERIVVKQEYMVREE
CVKADESV
>a7c55cce-8460-436b-95bc-a71fa20e5dac (mRNA) 251 residues [BFAB_07:1483989-1485483 - strand] [peptide] name=Bfab07g04030.1
MLFSASSIIAGMSLLSLALAAPAVPGDVTLEKRGFSCASPVTGLTAADCKHMSAIGMAGM
GTNAKAANGAVWIGTQGPNKFVFKNSASAPVTVIIWTQAAGDYQSSFMNARKPQVSYSID
AGQSVTISMANGVSGGWAGLYNQKTTLSQYGQVFNTWGEFTTGAYATVDVSREVNMGGNA
MTIQVGSCTSSMSKCVFTCKSGNTCGEAGTYSLINCAAGSQTGATYGLAAGQPSGGCQGF
NNGGKVSVTFS
>fa3b54cf-4001-404e-97ce-87b37ffaa312 (mRNA) 779 residues [BFAB_07:1487112-1490625 - strand] [peptide] name=Bfab07g04040.1
MSSEISANARQDLNEKSDKDQDAEIKVGTQHMQELEVDVGKILNDEGLDDIEGDTSPYPE
VRAVIPDVDDQAIPVNTLRMWILGFAFTMIGAGINQFFSLRYPSVHIVALVAELLAMPFG
ILLAKILPIYTLNLGPLGKWCINPDRHFNIKEHTVVTIMSNVSFGYGSADSTSIIQAAKA
FYNFDLKPGFSILIVLCCQMMGFGVAGLSSPWLVEPAAIIWPGVLSNCALLSTLHSRANA
IANGWKISRLRFFMYVMVGAGVWYFFPGLIFVALSYFTWVCWIAPNNLIVNHLFGMVTGL
GLSPITFDWSQIAYNTNPLLSPAWAAVNVFGGFVIFFWIVTPGLYYANVWYTAYLPLCSA
DVYDNTASLYNVSRIMTSSNTLNATAYAEYSPAFLPATFAFVYGISFAAITAVPVHIYLW
HGTQIMDAFAGRTKLDIHARLMRLYSRTPWYWYGAITIIMLALGIVMVEVYDTTLPWWAV
ILAVIIPAFYMIPCGIIQGITNVDANQLNVLAEFIGGYMFTGRPLANIIFKVLSTDVVGQ
GLYFAQDMKLGHYMKVPPRTLFFAQGSATILGALTQVGVTLWMLGNVKDICSEDQSNGFT
CPNGRTTFSSSVIWGAIGPGRVYSIGKIYSGLLHFFWIGALMPIITWIIWKYWRKDTGEE
RSWIRLINWPLIFVGTYNVPPATGINYSSWALVNLTFNWWIKAKWFAWWSKYNYVLAAAL
DTGLALSAIVIFFCITYPGAQFPDWWGNTVYLNTADGNGLPWLSLPESGRFGPANGTWH
>03c6ec39-3bdb-4170-bb44-640b709d4a05 (mRNA) 738 residues [BFAB_07:1491008-1494475 - strand] [peptide] name=Bfab07g04050.1
MAAQPSIYTRLAESHTHPTGEDHRALHRLPGFLKSGITPITPPPYENYYKHKAHQNLKWY
QSQRFSGFTTQELHLHDAFAPYSNLKATGQLTCPIHPILQRSKWRRQLPAQLARYPLGNG
REGYWDAWENDTVWNMMVPSLQLTTMFMANLYTWPWFDALFFGEMEEVDPVDLPPELQGK
KGYRRFKLRRPEISARANERTRVQEMLERFRDDVILDLSSGHTDTRSGLPDEFEFANTNG
SLNVVTKREIGISMAFEILEPLFNNKITEAERMIVVYRFAAVLLHELCHAFWECLRKRGI
RIDGEDVVGQNLEPWFEHQRTSELKVFGGIAQDFLREESVPCRGIPPMGFFLSEFDKSVT
EPLTTNPLVLIRKPPNYFVSHVWPITLTYFIDIQNQLWWNTYKTVFGPRSTHIPKLYGKR
TINRPDGSPPEPPSVGFENIDLDTTMIETGPKTQIQGIVDWFRNSYKQRAYAIRNAIIAH
GDLEGSYLLPPYPPPGDNEGEDEDMDDNSEEEEDDDDDEDIPSCPRYDEIKNYLINQKRE
LAIDTMKFRMPEHTLHQYIRRNGGIDLSAEEWRKFLLNSTERKEMFQIRNKNGKPPTPYH
AILRTLSNGWPTRLRAPTIPMQVRISEAQTECFLNATTIYLADRKEPWYRLDFWDADLEI
FLVLCNNWLADNNQAPLPKDIFEACIRAGVQPRFVLGPKGIVRKLPGPPPQAKESKKRSA
QGPQLGLPSKHRGQNRPR
>6455ae72-9684-4da6-a700-72c6f8565cfc (mRNA) 102 residues [BFAB_07:1496330-1497035 - strand] [peptide] name=Bfab07g04070.1
MSVIVTVMYPKTETSTFDMDYYMKTHMPLVQEKWGSHGLKNWTVTKLDESGGYSVQALLW
FESKEAWAKAGAAEGPTIMGDVPNFSSEKPLLVFGGEVERVV
>f0f1afcd-6cad-43ac-b429-6eb59c7608e0 (mRNA) 223 residues [BFAB_07:1495172-1496131 + strand] [peptide] name=Bfab07g04060.1
MPTECELLVSIWCSPAPIDPLAKALHTKCLSYLESVKLAIPRTLQSLPAEIQSQIIEKLG
FVGRAKLRETNHFYNATIPAVTPNSEELRELILATESEDYATEKQLLACNSCLRLRHVSK
FRDTQTRGKRIRNGPERHLRLCLQCAIWKGWYRLGKFIQVNGEDVYLCRCRRVTLRAHLP
PNWLTHKRCTDCYFQTEESRKMRKDLDRAREKPWMGLMKEFTL
>00040bd1-e9fa-4a59-9862-82daef58e86b (mRNA) 445 residues [BFAB_07:1497704-1499438 - strand] [peptide] name=Bfab07g04080.1
MNLGSYWPNVYCSSGIWWICSSKNPSFQGCCDIDPCSSNATNCPQSHLYPAAFRSVTTAP
NVAGSRSTTFQTSILPTATFPIPTISVTTPPGASTIDQFLSLEYSKSSKTASWNNTGYLT
QSSLNYSNSGTESTTPSIFYLTASSIPGFAQIAPSGTILTNFSDSNNHSSSIATNPNIAT
VTSISTFTAVRISVYTVPYSSSESAYPSDSLPLLTTTLAPVTNSSGSSSITSPLYVASSA
SPSPTPSTAPSSSTTADTKLIAWGATGGVAFILVFALVSWLIRSRNRAKNNNNKPITASL
STRLPWKKTSREIPRISLSSYPFKGMAPSTSNSSEEASNETWSASLRDYQNMGLMDGSKI
GMDNNSEPRNQKPAHLSGYESHYSRPFQSQDVPENQNSTSLGGGLDRNSFARRMVQGGWD
AVDLQSGYVPRDTGNGWHGEHDMRR
>8079dc23-fe7f-4479-a553-3b5a36cbdc9b (mRNA) 375 residues [BFAB_07:1499707-1501262 - strand] [peptide] name=Bfab07g04090.1
MSGNSMGSCPLGGSWWICLDQSPTFFGCCASDPCNGIGCPEEDLLPAGMGTAGGPDASSN
DGSYWPNADCPNGGVWYTCSRQTPSFQGCCDDHNDPGSSEKFNPCLENGCPLPRLYAAAF
RSVPATFASIVASKTSSDPTSSLSISSFSASSPSTLSSPASSSISASPSIYISSTPSSPV
TNFATDASSTETPSSQDSATVTATVGSSRHNSNSKLPITAIIGSALGGVVVILLVLLIIF
CVQRYRKRTPLAGAVEPYYQPPPQDISMVKEISSPTFYEGSASDAKALRKDYRPVSEIPS
SPPLSPAPPYQSAPQSPEFSNHHEIDSSILHEVESQSLQQKSFVSRPGTVELPDTSEDPF
RASLPEVLKSGSTRN
>a28e19a0-52d4-4902-a2ed-1e3b83c64fe7 (mRNA) 399 residues [BFAB_07:1502938-1504640 + strand] [peptide] name=Bfab07g04100.1
MGVSELIDSINLATRESSELNDEDRGKLLNACGNLQSSLEGPRYKLMKMIFSSLQPVALG
LAVDMQIFDTAAALSAARKEIRAEDLALPKGADTLLVVRVMRLLVGMGYFTEMARETYKP
TPLASALVTSSPYGQAVIHFTTQNEVVASLPTYFAKKGYQNPKDAYDGPFQFARQTDLHC
FDWIATQPRIQHAFNTVMTIPRTIGRTAWYEYFPVAEKLKVKSPTDTLIVDIGGGIGHDL
VRFKEAHPNLQGKLIVEDILAVVSGITPGSLPDGIEAQTYDFFKPQPIHNAKAYFLANVL
HDWPDKQACVILEQIKDAMGKDSMLLINENLMQEENVSLESACTDWMMMGGFSALERTEG
QFKELIESVGLVLVNVWGAPGVESGPWEGRRLLEVMKNQ
>6e2051ad-77aa-4b00-95eb-e485ad36fdde (mRNA) 237 residues [BFAB_07:1506600-1507607 - strand] [peptide] name=Bfab07g04120.1
MAKHSKGQGQASSKPKQKTKKSRSERSCDELTAQPSSNDHQRHQIDTIMQSEARPISQEQ
IDQGFQSLYPDSKAVEDRWSEDDLASASHERSFDEANSFFEAPEQELQGPVDGPLSASDF
ENDLGVFDHLGAHIPTAIHFDAQSAGYTSPQWSWEAPVTTTQNIAFSTPSSYNASITAIA
YQGTYDSPISTVYSQPTTATLDTLPVTIQYQLERWAYENRHDEITPADQMEGYNYNH
>dabf9476-0098-4f09-af4f-7253e54094c4 (mRNA) 905 residues [BFAB_07:1514800-1518592 - strand] [peptide] name=Bfab07g04130.1
MSELRYDGQVVVVTGAGGGLGKAYALFFGSRGASVVVNDLGGSFKGEGNSTKAADVVVNE
IIAAGGKAVANYDSVTEGDKIIETAIKTYGRIDVLLNNAGILRDISFKNMQDKDWDLIID
VHVKGSYKCARAAWPHFRKQKYGRVINTASAAGLFGSFGQTNYSAAKLAMVGFTETLAKE
GAKYNIHANVIAPIAASRMTETVMPPEILDNLKPDWVIPLVAVLVHKDAQENGSIFEVGG
GHVAKLRWERSSGLLLKADDSYTPGAILKKWDQVSNFKDAEHPSGPADFMGLLEKSMKMG
PNEQGETLDFKGKVALVTGGGAGIGRCYCLAFAKYGASVVVNDLMNPDDVVQEIQKLGGK
AVGVKASAEDGDAVVKAAIDAFGRIDIIINNAGILRDKAFTNMDDKMWDQVIAVHLRGTY
KVTKAAWPYFLKQKYGRVVNTTSTSGIYGNFGQSNYAAAKCGILGFSRALAREGAKYNIY
VNTIAPNAGTAMTRTIMPEEMVQAFKPDYIAPLVVALCSDKVPKPPTGGLFEVGSGWVGR
TRWQRTGGHGFPVDVKLTPEAVLKNWEKIINFDDGRSDNPEDSQDGLKSIMANMQNKKGA
SKKAEKKVEVNQEILDKIAAAKKAEASGSEFTFEERDVMLYNLGVGAKKSELSLVFEGDE
NFQPLPTFGVIPPFNAEAPFSFDDVVPNFSPMMLLHGEQYLEIASYPIPTSGTLISSPKL
LEVVDKGSAAVVKVGTTTTEKETGRKVFYNEQTVFLRGSGGFGGERKGADRGNSTRANKV
PERAPDMVVEEKTTEEQAVIYRLSGDYNPLHVDPAFAAVGGFKAPILHGLCFMGIAGKAV
YQKFGPYKNIKVRFAGTVIPGQTLVTEMWKEGGNRVVFQTKVKETGKLCIGGAGVELVGE
GKEKL
>89b15029-1238-4485-b996-76a22bed0c04 (mRNA) 317 residues [BFAB_07:1522639-1524233 + strand] [peptide] name=Bfab07g04150.1
MTSTSNAIPQAAIIDDKTPHILPFILHYLSLHQKTHPTRPFIIGLNGIQGAGKTTLVNTL
YEILTRDHGLETLVLSIDDLYLTRADQEKLARENEGNKLVQYRGEPGTHDIPLARSLFAS
LLQSPPLPTPIPSYDKSLHSGLGDRSPRSRIVNDTSQHQRPIQIILFEGWCVGFRSLPPT
SISLLHKNSLALPSSSSPTTLRDHPLSSLLFINQKLKDYDIITDTFDIFIHIDALDTQYV
YEWRQEQEQALRREKGTGMTDEQVKIFVDGYYPAYELYLDGVRRGIFRGGKLGEDWEGRQ
LRLVVGKDRRVVQVEKV
>8fb25246-0c7a-4f85-b9b5-ccaa68d83f23 (mRNA) 520 residues [BFAB_07:1524326-1526464 - strand] [peptide] name=Bfab07g04160.1
MPLNFPFNNFFNNVYNMAGNPRLSGFLQQESNPPLPPSPSPQPLHQRTDRQAMAQKLRIL
PKKQRDVSANMNRAHNQEPVYEQPAEPPLRNSVPGTNRMQTEYEPEEEQENAENFEDSTV
NSTFDETVSQENFRGGQVMAAVPTGGNREFDGGYHRGQQEELERDNFRVPHENGYDRDSP
EESVFEQEYIEDARAPLQMRKTFHQPNGQGPQTQALGAPIYKQSQTPKPAIQSEISQQPQ
KPQHNSPSKPKTFDRFNHAITNRPRNGMQTIAGSRKRGLDEGVFSPKPKGGKAQVEVLEN
AILPTNMQYHLPPPPQDTQQGQSDGSSEGEQYFEDSTQMEEQPALQSRPNFHAGNSQHHI
VHLKRADIPLDYDDAALRNMDYEQLRNESFEGPPTPSKQPSEPDLSLSDRPINERVSHLV
EQHRPSNQEEMERQREAMAEFFGGLSKDDWEEAGDWFLSRFSSTLEALKKARKEKRAMVA
KFEEEIEQREKDVRGCLRTYNQDMERMKRGAKGVIEGNNV
>e707d45b-895e-44d1-8e57-d82becc56a46 (mRNA) 700 residues [BFAB_07:1526708-1529423 - strand] [peptide] name=Bfab07g04170.1
MASSGSLKNISVQPKFYHSPPFSAEAPGHKAVNGETIPRRHPLTANKLATRPSEDVSTVY
DIIKRSSEKYGNAKAVGSRTLIKTHQEVKKVKKMVDGEQQEVDKKWTYFELSEYKYMSFS
EYEKLILQVGAGYRKLGLKKEDRVHIFAATSAHWLATAHGAVSQSMPIVTAYDTLGEDGL
KHSLVATRAKAIFLDPHLLPTLINPLKEAKDIQYVIWNSQNEVKQENIDNLKKAHEKLKI
LSFEELRKLGEENPVEPVPPAPEDLCCIMYTSGSTGPPKGVPIKHKAVVAAVAGVNVIVE
PYLGPGDGLLTYLPLAHILEFVFENACLYWGGTMGYGNPKTLSDTSVKNCKGDIREFQPT
VLVGVPAVWESVKKGIVAKVNGGSPIVKNLFWGALWAKNNLLRYGLPGAEALDALVFKKV
KEATGGKLRICLNGGGPISKDTQRFISMAITPMINGYGLTETTAMGALMDPMEWTDEALG
DIPGSIEIKLVDFPDAGYYATNKPNPQGEIWIRGDPVMEGYYENPEETAEALTADGWFKT
GDIGEWDKNGHLNIIDRKKNLVKTLNGEYIALEKLESIYRSATVVGNICVYADQQRTKPV
ALIVPAEPALKKLAEKLGVQGSSVEELVHEKKIQDAVLKELQQAGKAGGLSGIEIIEGVV
LSDEEWTPQNGLVTSAQKLQRKSILEKYKKEVESAYARNN
>0537af8a-dce6-43f2-b677-383981f56b42 (mRNA) 309 residues [BFAB_07:1530227-1531965 + strand] [peptide] name=Bfab07g04180.1
MAGRVQSFLDSLGPEVEDPEEEAFLLFSQTIPSQNLGFVDSKATEIDLTINGRDLTIYQS
PTILSSNRDGGTTGAVIWKITPLFAKWISSPTNPLLQHQIITSDSIVLELGCGISGLIAL
TLSPLLQTYILTDQPYVLKFLSQNLSSNSSSSSTTTSKSKSRKSKTPSSTSTSTTQQTST
NKIIPLTLDWETDVVSPSLTCSETTTSFDTIIACDCIYNDALIPPFVQTCVDLCRLRSAS
SPSKNQDQTEPSNPTLCVIAQQLRSPDVFESWLKEFNKFFKVWRVQEGDIQECGLGEDSG
FVVHVGILR
>0995c214-e086-4333-8f27-9b2500e3ff43 (mRNA) 236 residues [BFAB_07:1533001-1534012 + strand] [peptide] name=Bfab07g04190.1
MSVVSPKAKPTACDACRKLGVKCSLNNYVDDCERCTSLRTSCFVTDDYNITIHKVPQRAL
QNFRSAKFLVQMANLRRELEDSESDGKNTYAIIEAVVSNFEGISKEAINYPEFMGFFALN
FSSLINWIKIYSGHQVWNVAKYDQKTLQSLTKLGAIMKSLDCSPISTSVSWLVWQISIIG
SERPSHSDSLPDNHSQTHTSSSKLVYEPEHMLPAESQAEDSKDEDLQDENSQVGEL
>2b893587-2eb9-4fb0-a533-d166fcbd29cc (mRNA) 435 residues [BFAB_07:1550969-1554062 + strand] [peptide] name=Bfab07g04200.1
MQRASSAVDFNSLLNPPQSAQELEHQAARQKLAIIQQQQQHQREAEMAAMSMMAPTMVGG
HHGDDRQDLPRPYKCPLCEKAFHRLEHQTRHIRTHTGEKPHACMFPGCTKRFSRSDELTR
HSRIHNNPNSRRSNKAQQAPQMGVAMHSESMATMMPPPNKNITRSAPASALGSPNVSPPH
SYSSYSSNYLSSLNPHGRSLGGSPNNGQAPLTDINMLATAATQVERESSTTATHYSQHTQ
PRHQPYYSHSSHNSRNHLPSLQAYAMTRAHSHEEDDHYAHRHAKRSRPNSPMSTAPSSPT
FSHDSLSPTPDHTPLATPAHSPRLRPFGGGYDLPGIRNLSLHHTPALAPMEPQHLDGQYH
TTATPTPPTTSAPRTGLTISDIMSRTDGSTRKLPVPQAPVAVQDLSSPGEIGFNTSGQSS
TTGSVAGNDLADRMI
>0ad03d5a-2f07-47b6-8e70-a63d8a2726e7 (mRNA) 411 residues [BFAB_07:1572815-1574486 + strand] [peptide] name=Bfab07g04220.1
MAPIFALAMAISALILVYYFICFSTHKNIYRRCTCKENITSIRNLSEAREILKESSLHSR
ARPNQRLVRVFSISNAFTTTNQAFYQSFLKAATSLLKTSNESASTLPKEVLPILNDEIAP
SISEDGITPLSPLIQVFCFRLVLLKFFPSKHMRPMQIPIIHITQLINSLWISSKCSCFVH
PSQIPMQKSLHHELDSLSLSTSYDNENPLNILLPAYETLWRIVLRCFLEISFCHSSDVAA
EWKDVLSQFLKNMTAEQFGKRIGKFSARDIVFEALRLYPPTKRIYRQDTDNGSVFAVDVE
FIQRTEEIWGTDGNDFRPERWFELESKGNVAYKEAWMPFGKGKFLCPASKMAPMMVGMLV
GCLIDAFGSDHWVLEGEGVKDVISRGMPLDNGREAFEFLSLRRVIDEKFDV
>c398144f-4a28-4c5f-b66b-2aafeea19913 (mRNA) 293 residues [BFAB_07:1575369-1576920 + strand] [peptide] name=Bfab07g04230.1
MSDSNKNFLLSNVFNVKGKVALVTGGGSGIGLMATQALAVNGAKVYIVGRTEEKLENVVK
HHGQNIEGEIIPIVADVTRKDEIARVVKEIESKEKCLCILINNAGISGATQQTEAKTAEE
MKKNLFDDESSTFDDWCNTYRTNVPQLFFMTTAFLPLLQEASDHQYGYSGTVINISSISG
IVQSSQHHFGYNASKAAAIHLTKMLSSEIAGNGLKIRVNSIAPGVFPSEMTTGGESGQDQ
KSHIEKEKYEKVPAKRPGKDEDMAGAILFAATNQYLNGQTVAVDGGYILHAGA
>7c941863-a2dd-4709-a4a0-6943f10b21c1 (mRNA) 247 residues [BFAB_07:1578186-1579297 + strand] [peptide] name=Bfab07g04240.1
MSTYYHGALKVECFINPQSEARWHLAAPASGIHLASTRDDSPLPPPSSESSWLTVNKRGR
GYLMCLASGKQIRLKRRNFCFSTHQRLSFKYTASEKYLEGRELSGKYTWKYQKTTMQYFL
TKEGEMRVYAMMAFDPNCFNGVSGKFRMYDKCNIVTSGEPFDNAEGELDTFIYLSILEML
LYQENKTLGFHAGGKTREDDVMDCGCVCHCIPGKCTWTKFGAKMKDIFNVTVREANEDEK
DLPAYSA
>a9316d92-9685-41f2-ba34-2fa879c4ad60 (mRNA) 886 residues [BFAB_07:1580226-1583455 + strand] [peptide] name=Bfab07g04250.1
MSPPEPSSTRKRLRSRISDEADELSPLPAKSQTSAAKRQKVDVPTSTLGGISGRFKKLLG
LGVKKETEDSPDELGEDIYDFKVTDDEEENTNPSRKSNTKPVAGNTKAAKSTAKEVVPPP
KRGRGRPPKNKEYLEKAKALSRQAIQNESTKTKQNKDTEASNEDIEPAEKSTKTYNSRST
RIPNSKDIVSKAQGKTTEALESSTPKRGRPKRIIDGLAGSTAATPKGILTPSKSRNPTIR
KSVAFDESGKDNLEGFKDIPSEARLKNSQGKTIPLTSRSIDDYYDEDDDDGPVCEICTKP
DSVAPNKILFCDGCPLIVHQKCYSVSKIPEGDWFCKKCQKARVAAEAAKAAENDGVPDSD
DEISCAVCQGLDSEKPNEIILCENCDYAVHQSCGNIPKKPRGEWLCETCVSDVDHDLLDG
EIDLGPISNEVPSIEGFETHLKTMQRVLLNRLTGEKRLRIQGHEDDMHKVHQLVEQTVLA
GEGNSMLLIGARGSGKTTLVESVISDLGKDHRQKFHVVRLNGFVHTDDRLALREIWRQLG
REMEIEDDSNGKINNYADTLASLLALLSHPSEISGIETDHAAKSVVFVLDEFDLFTTHSR
QTLLYNLFDIAQARKAPIAVLGLTTRVDVVESLEKRVKSRFSHRYVHLSLPRSLPAFWEV
CKQGLVVDSDDYDDEGFDISTPGQREFLSFWQNMIEKLYNNDKSFKHHMQSNFYRSKSVP
AFFTSLILPISSLSMQNFPLRGQSFNRANMALSAPDSKLHILQGLSELELAMLIAAARLD
IILDTDTCNFAMAYDEYSSLTSRHKIQTSSTGVAALGGSAKVWGRDVALGAWERLVDYDL
LISAAIGAAQVGGIAGRMWKVDIALEEIPGSVEGLTGVMLKWCREI
>80f60982-e163-461a-a5e3-9f0fe0ef3566 (mRNA) 975 residues [BFAB_07:1583504-1587365 + strand] [peptide] name=Bfab07g04260.1
MGNVAATDLLGLDSILAFAGRLSFVFHRYRLLSTENEYIIPSVVEEHVSLLSSIIGTLNE
VLGLLKREDAGKTQNQVFSDDGLQFVNLLVGECAKVLDKIAPTVRKAAQKEERKKKRKIA
KPPKAEIIAPVVPTQLKLDEEKFLKDLETAVWYRVDNDTYTYLEQFKKIQLHLLLVYQVV
TVGSLLGDLSSGKVDIEKIVLYHERINRTFDLVCSYLPSRRRYFRSRSSSACTLSGSNSD
SEVGSAISRRRRNPCPNFSTYSLPPPSPFPPFRPVEIWVPQPAPRVINNASPPPPPVMAS
MPRAPIPNSTSSPRVIGLTTPNTKPPSYESHRGPVTLPLKQVPSTNSPPSEQIISDKRGQ
NSKEYSVTETEKEQVVKKHAEPRASEGQLFNSPHSRLSFKIKSLFRSKDSLAAEMKKVLE
STSSVLTAFLIQGSDIRPIPHSAFHSLKTTHMRTILSQLNDNSWLETFSKLTRFEHNTLD
IALCPYWKTELRREVVVLKVLQENKINAWMRLIAEKSNTPLLPQHSNGRVILVIAREHLN
DGKRMSPIPRGTVGTFVQRFPSPPTPPEFLQSRPPPPRVLSGPPPPPPRSMIYPYPSPSM
QLAINSPPMTADSNNITGSRCIVPDSLGAPARGMCHATQEHCLPPFNQARGLNGPLPPHP
PPAPKPHSNSSELHLCSDAEALIALTTYAEYTIRQAEPIEPSQPRTWFKIIITHEYNTLP
DIVARVDSFKKRGGSLINSQVRLTDQQAIHMTKILEYLQMKERDHRFEWCWVELSLHNSM
GEVDLVARGHAPQTATMMHLIARRSLKREYKPYAVYSLLVRGPRPGFNNGLPPRPGPPVE
MPLPMPGPPPPPPPPQPVAAAPVYIDRFRPRPRGNGRNRGMSMSDPDDSGSSGSDSDTTY
DSRVGRVRRTGRNNRRMGRRHSDSEISDDSDDEEDVIKIPIVLKRGDDVVKKLLDLWTPN
TGNVGKSTGKVSERS
>25340d0a-c9bf-44b0-b513-34c8cf28fd28 (mRNA) 1043 residues [BFAB_07:1587473-1590975 - strand] [peptide] name=Bfab07g04270.1
MTDMERTILDHYQLSSPYPIEWPADKDTSDVSDEEDEAPKSNQNGAMAAAVARRKSKYFA
LERASDRKSLIPNAQKSGDGVENLVQRDEQDPLGSTDSVVRVLRQQGLPVQDDIALRNRF
LLSSTTFSPALFLSQVHSTASTQDLLRGLDLLSRSIDQKSASLKVLVESNFERFVRAKAT
IDNVYTEMKYRGAEPPTASRHRPHSRHASRSSFRASSGNQIGMTTPAPVDVRKKNALMKE
SEYGVLGIKTPLLDVSAKAEEVWGPALGGREKEDSLKVMAGTVDRYKEYYEVNAAITDSI
KRKDYESIVEEYTKARRFADDAKKLTETLGTTPPTDPQIHQILLAARVWHDVEHQIEDFK
RDVWKKLSLAQGSARADGIFGAQQDQHMELIGILLELGVTDNPIWVWLLSRFDHLKVKIQ
TNSDRSKVEIEILRRRLASAEKPAPQIIATHLRSLGRQIVDNKQISVDSPDIIELWEKLN
SFLHGMFSAQGILGEVTEFWQTVQSFIDGRAQKALPVGINGKSREHHRLSNDNIIELQQG
TVELVDMLRESIYELFVDPPIEDISALFSPLPPTPRTPRTADSLTPSALRGSRFTFDPNN
LPPPSPRRGEAWEKFAFWPPWSNSASGVHYLAKFLALVGSGASEMSEVSPVINGDGSALE
RLKALVGGARERCVTAILAAWNKDAENIKVLEDWRRSPDKRDLTRMPANFSAFESAILSG
MQKILYISDASIKQGSAEIVLPPPAKLLQMVRSQFVTTLYKALSGMVENAERSVKKAEDD
WTADTDGLATPVAMVVATSMGAGTVDASDRNVRMLLTLSNLQALRVDVVPNLTTQFENAF
SVKLTEEAKTIRDVLGQIDARLFQSYTKPTVETLRDIVRRGVLAPDWAPTEQPKEVRPYV
YEALLCLVIVHTQVSTTASSLTGQVLSYLLEQVSLEFLEAFKQRQRFPLNSLMQATLDIE
FVAQTMNQYTTERATETSSQIYQELDKGTDGEARARLQKILPGMRVDLKRLREASKSEFS
CFKKARSGNKADRTASSSAQSTV
>291485c1-1a27-4910-9694-72524961de1f (mRNA) 384 residues [BFAB_07:1591195-1592941 + strand] [peptide] name=Bfab07g04280.1
MLAIRSFGAPARRQCIQVSSRAWKPAAVQARRTYATEKSKIAQFHGQKGSDGLYTVSLIE
GDGIGPEISQSVKDIFTAAKAPIKWEPVDVTPQLRDGKTTIPAETIESINRNKVALKGPL
ATPIGKGHVSLNLTLRRTFNLFANVRPCRSIAGYKTPYDNVDTVLIRENTEGEYSGIEHV
VVDGVVQSIKLITREASERVLRFAFQYAEDINKLKVRAVHKATIMKMSDGLFLSTANRVS
KDFPAVEFDSELLDNTCLKIVTDPTPYNDKVLVMPNLYGDILSDMCAGLIGGLGLTPSGN
IGDECSIFEAVHGSAPDIAGKALANPTALLLSSIMMLRHMGLNDHAKRIETAIFDVLAEG
KTLTGDLGGSSKTHEYAGAIISRL
>584aed09-4ebc-4cec-b697-adeb6ff9fcd9 (mRNA) 295 residues [BFAB_07:1595210-1596642 - strand] [peptide] name=Bfab07g04300.1
MFISDVTNSIPKWKFMLAIQKLIHRQLPSSNMAPLVLPSVLIASAYLLSTVSAEPNVAEL
VGTWSTKSAAVLTGPGFYNPVNDTLLEPTHTGISYSFTEDGYYEEAYYRAISNPAKPSCV
SSIMQWQHGKFVLNADGSLSLSPFSVDGRQLQSAPCTADSATYTRYNQSETLQKYQVYTD
PYTKLTRLDLYQFDGTPVNPMFLAYSPALMLPTETLNPTTLATSTSSSKMKRWLGYGDEP
EEPTTSEGYLLPLNKNAKHISRGIEQPSLINRIDLDLVWWAGVGLTIFGGAAYLL
>79b8535b-dbc3-4a40-a259-127b855fbbc7 (mRNA) 529 residues [BFAB_07:1593172-1595149 + strand] [peptide] name=Bfab07g04290.1
MKRSLKRTAVRRAMAGQDSYKYEPLPSSGDESDPVTSTESDDILESLEQHLRRFKKRSRR
KVINMGVAAAVVLGFVYWAAVGFGLPTNSSCDTINAGYYCQPEISHFWGQYSPYFSVPSE
ISAAVPDQCEISFAQILSRHGARDPTAGKTATYTALIGRIQNTTTSYGADYKFIKDYKYS
LGSDQLSVFGQQELINSGIKYYNRYKSLASSITPFIRSSGQDRVVESAQNWTQGFNSARL
ADSSSTANASYPFNIVIISEDEGSNNTLDHGLCTVFEDGPDSNIGDSAQAAWASIFTPNI
TSRLNSNLPGVNLTMADTINFMDLCPFNTVASPTGTISPFCNIFTAADWKAYDYYQSLGK
YYGYSWGNPLGPTQGVGFTNELIARLTNSPLQDHTSTNHTLDDDPATFPVDKSIKLYADF
SHDNDMTGIFSALGLYNSTSALSNTTREDALQTNGYSASWSVPFAARMYVEKMTCAGESE
ELVRVIVNDRVLPLETCGGDELGRCGLSKFVDSLSFATAGGDWGSCFTT
>18af77c6-1b1f-474a-9e41-3e470012aeb6 (mRNA) 246 residues [BFAB_07:1596703-1597699 + strand] [peptide] name=Bfab07g04310.1
MASSAALKSSKKELRLSIKKVLSTVTNESVHAQSAAVLHRLINFQPYQQAKRIGIYLAMP
TGELQTDAIVRHALESGKQVFVPYLHKSSYQSPDTPRSVMDMVDLRSLADFEALKRDSWG
IPTIPAETVGERESILKTVSSKGGLDMILLPGVAFDIDPKSSFIRRLGHGKGFYDYFLHR
YRQESGSQMTDPANPGTNVLLYGLALEEQFLNSGAEISVPVGEHDSLLHGLLLGDGEMKD
GLVSRE
>1e88219d-7d4e-4cac-a163-24bac254ebdd (mRNA) 94 residues [BFAB_07:1597509-1598329 - strand] [peptide] name=Bfab07g04320.1
MNRGGGGGRKVLLPPINFIFKLLQQHTPVSIWLYEQLGIRIEGKIRGFDEFMNLVLDDAV
EVRQATKDKEESRRALGQILLKGDNVSLIQSASG
>38b59e47-2709-4836-bbfa-6dc55a27047c (mRNA) 970 residues [BFAB_07:1598468-1602509 + strand] [peptide] name=Bfab07g04330.1
MVAVATNGNGPQDAFTPVIAALNTMRDGQRGQKEAAHSFLESFQKSAEAWQITIGILSSN
AEPDAKLFAATTLRGKITYDVQQIPSDSLPALRNQLLELLKVFATGPRPIRIQLCVCLAI
LAIQMTTWKDVVPMVVSTLGNSAESLACVLDFLKVLPEEVTEGRKITLTEDELQQRTQEL
LGDNTAQVVQLLIAYAQSSESAATNPQLLEVITSWLREVPVADIVNSPLLPVIFNALNND
RSFEAATDCLCAIFKETREVDEYMPTIEILLPRVLALQPRIAQAAQEEDSESFKGFTRIF
AEAGEAWVVLIAREPKVFRPLVEAILECTHRDFDKDAISLTFIFWYELKLYLILEMYIEA
RMQYVDVYSSLVDIMMKHLEFPTADGADETDLFDGDRDAEEKFREFRHHMGDVLKDCCEI
MGVTPCLTKVYDAIKAWMGSYASQATAASVPHWQQLEAPLFGMRAMGRLVDKDEDIILPQ
IIPLLVQIPHHEKLRFATIMVLGRYTEWTSNHPEFLESQFQYIVSSFTTDSKEIVRAAAM
AMKFICSDCKHLLGGQVVQLQQFYDQTLDKLPGVSQEELTEGVASVVAVQPPSQTYQLMK
LYCDPLMSRLMALANQANDEESKLQVADHMQLITLFIQIVTPWIESSQDHPAVKYCQEIF
PILSTILDSFMTFTPICERVCRTWRYMIISYRTSMAPLLPQMANKLAEGFAASRQGCFLW
VTSAILREFSEDREHVDEQTTESIYTFFEAQSTAMLKAMADLPPQDLPDVIEDFYRLLLD
ALLYYPHKMIRSHLFTPIFRAAIAALDLEQREPLSAVLHYIRDVISYGGDNPSSSASNIN
PPEIQQLVRQLILANGNELVKGIMKGMMISFPGDCFTDGSGVLLGLFEILPQETASWVDG
ILRMLPAGTVREAEIDRLMNSIREKLSIGHDGVRKVRSLLQDFTNTYRRRYVAPRDGLGR
LEATRFQYSG
>f4417caf-1e8c-4320-b4a9-b46c96b1baa1 (mRNA) 725 residues [BFAB_07:1603303-1606342 - strand] [peptide] name=Bfab07g04340.1
MGRKPNPLILQYFERGAKLNDSSNRYHHTCRACSEKFPKGRLDTLTSHICRKCPALDRAT
KQRLVLEFNNLPEIGDRTNNQHINIQTANNQQTTAIRGRPFQGMTPLETLAEVSRDMAES
EHRNHRPGNGSPLGENQTAMSRGENLELQEQYTLDNPPMSYESRTQRDKKSVNQKGHANE
HGLGRSQSASPNSMAATAAAATRFIPSMVDPQLLSEDAVAQDKLSEDKLTRQLVEANAMS
DSLFSATSDNQQHSWGMMEVPMPASQVAALQVQDQMAHMSQMTYPEHNPTDNTFENGQPQ
AQSPKTHTRIAMNPMTTEFSAEYGNGQKATKPKVRGKFNEGRRKEVSDIRKIGSCLRCRM
LKKPCTAGDPCDTCKGVESARLWKTPCIRTRVAHELCLYSAKLHAVLAHHQVLAAKGSAT
FQNSLYQIEVSHYPGTTIYASFPCLEAQDEETGLTSFILDTDNDDLSTKLEAYAKRMMPI
FIDNEPSQFIRTTLQTALNVSIQKQDNFLSRALEFWAIVHIFVDSEIRWEMCAKTPSVPD
EEAGQTKPILSTERSFAIIHTQLNAAAENKASQMCKGMLNELERRLLNKSSKYSFELFLV
TVIILNCVEKSTWLFKCWEGEDFHGQWPLDNPPQSYANQGDDLINVLQMLLRMRDIPPKT
FVRQDCGLLAVDDTSDQVIRDYFDQVQLSFTDVHDKQVRHFFDPADSRSYELRYISRLLL
PQVPN
>c97eba4f-c720-4b1d-a807-eefad05a37a9 (mRNA) 630 residues [BFAB_07:1607971-1610686 + strand] [peptide] name=Bfab07g04350.1
MKFLSIIYLCFAAIFSVSNATELVKDDTIGDIWEAIESATTCAGCNAILLLLKGVAAFGD
TVFVDTLTEICKLAGVEDSDVCAGAIGLEGPIIAQDLRKMTLGSHTSQLFCITFFGLCDF
PAVTPYKVPFPSPKPATQRPAVSGKTPLKIVHFSDIHVDHEYEVGANTNCTKPICCRPYT
SADAPGNNSYPAGEYGNYNCDAPVSLEESMYAAIKEVAPDATATLFTGDIVEGAVWLVNS
TGNIADINDAYSRMSGLKNLFATTGNHESSPVNSFPPKAVGVTTNQWVYDTLSTNWIPFI
GSTAASSADSFGAYSTLLPGGNLRVISMNTNLYYKSNYWLYEATMETDPSGQLAWLVTEL
QAAETAGQRVYIIGHMPMGSNDALHDGSNYFNQITQRYSATIAALFFGHTHRDQFQITYS
NYSSQTAANAIEVSYIIPSMTPTSGYPAFRVYSVDPVTYGILDFTTYIADFSLTSSTQSA
PTWKPYYSAKAAYGSLVTPPLTSATAELTPAFWHNLTTVFASNPTVFNQYIARKTRGYNV
ETCTGDCATEEICQLKAAESQYNCATIKPGISFKKRSEGSERLERRIGNVVETLGGDCEG
SVIRPILTKLAAQEGLLESALEMAKMKARK
>0d1fb692-216a-4257-9da7-9c2ccb3e8ca0 (mRNA) 278 residues [BFAB_07:1612016-1613178 + strand] [peptide] name=Bfab07g04360.1
MVLCFPLKQYFGHTKTDTEPRTFIHLVRHGEAYHNLGHMNKKINPKSYDIQDPYLTHKGI
EQAKSTRQQMTKRCPVPNLVLTSPLIRTLETSLHIFPFANDVSIYPQPQIVAYDELRENG
TYLCNVRQKTFDLTNNYEHKGVDFTALSPVVPPMKCVLRGKQRAEIVRKQILVISKLIRK
GGGLWKGVYIQGTGQNIGPHLQVEQDIHIVVVSHGSFMEYLLPLSHTIQPVWQKFKPAEM
RTYVMDEDGHLDETVESRGARSTAVLQKVSLSLTSASD
>7daa1007-9815-4c9e-9814-13018a110019 (mRNA) 756 residues [BFAB_07:1613741-1616878 - strand] [peptide] name=Bfab07g04370.1
MPSSNMALLLAVLAGMPCSMAMNPYRYEHGYNSTIAIGTATGTGIATGTGTPTLAACGIV
SSLASVAKVATPSATPTVDAKLAHDCLNSVPLNVTAALEYVTGLEPYVEWQSDLADLKDP
PADYFYPPFDSLGKLASIKSNLERGGVYANEYEFQQDLYQVFTPAHDGHFVVYPDLLTAA
FEWRRQRSLVSISSDGVEVPKIYLYEDITSAPSEASEVTEINGVDAVKYVEDWIFQASSN
QDADSAYNTMFYEKAFVAGGISKGYFASGGRIKYIYPGANTTFGFENGTTLVTENYANVK
GDFTGVTDGNSFYQKFCVPATTESAEATASAPPAATVTATGYPTPVVITSDAIVGGYYLS
EPGFEDVAVLSLLAFESESIAEFQAVTQTFLADAVRDGKTKLIVDLQANGGGYILQGYDE
FRQLFPHIVQDGFSRMKEHDTFNTISKIFSADIPADYDPNTASPGLINEYENWFNYRYDY
NLTNQPFLTFEDKFAPHVYKGDNYTNLMRWNLDDPLNTVNSTYGMGIEISGYGSLSNLTQ
PFAAENIVMIYDGYCASTCTLFSEFMRVQAGVKSIAFGGRPSSGAIQGVGGIKGAQVLSF
DSIYSYAQSAVSSPNATPEDIAILNRLTTFPIERSTATSINLRDAILPDNVDDGLPAQYV
VEEADCRLYWTAPMITDVEKVWEAAATAAWGGGACVAGAGLPYEKRDVLSRNSKTKEKKP
VVNRKKDRNTLVMKKRDENVEKDPLWNARHGKKIIS
>2b7fe073-e497-4df2-a132-57e0a85e5c5a (mRNA) 342 residues [BFAB_07:1621112-1622825 + strand] [peptide] name=Bfab07g04390.1
MAPDLNSLPPSRSSNTSPTMSRTASNPGESPAHMNVRAQSPSPSPRSASTSLQAAAAVNA
GLQQEENTRRGSTSRHRQASTASHSGRRRSTVLNALQMNDPTLPPQGEIVSESQNRTASP
MSLTGSPITASGDHRHYRAPSLGEIHQELEQEQEAQVNRLLHMIRTQQQQLQQLQAASGQ
VAGSVAIEESTPTSERSLSFSTQNIPPNVTSAVQAPRSPVTAMHPRTSFDVARENLSRRS
RTPSRTASPRLRSTSISNEGGDSWNLGGRDESAYYQAETQTMIRENQMLRQRIRELKRQV
SEQHVNSSITHEPATSSHLTSSTSLPEEATPLVAPAEEPKQD
>5ac84652-387a-46a1-8260-5a978220a00b (mRNA) 409 residues [BFAB_07:1622962-1624519 + strand] [peptide] name=Bfab07g04400.1
MFRNSIRGQRASKFMQRRCFTSTISRQADFTHAVIGGGAVGLAIARQLAGRDGTSTLLLE
RNSAVGMETSSRNSEVIHAGLYYGADSLKTKVCIRGRQMLYALCAQYNIPHKNMGKWIVA
QTDQQYEELVKVHEFSKTLENVPTHFVSLKQAAIEEPYVRAQTGILASPSTGIVDSHAYM
QFLHGDFEERGGDTALNSNVVAITPLGNKGSLGWEILVRDKASGQENTFTAESIVNSAGL
GACEVNNMIVSPDQHLTQYYAKGNYFSYSPSTPSTKHLIYPAPEPGLGGLGTHLTLDIAG
RIRFGPDVEWVDSAADLAVNSSRLPQAIEQIRRFLPDVKIEGIQPDYAGIRPKLARGGAV
GSGKGFQDFVVRDMAGEGWSGWVNLLGIESPGLTSSLAIAEVVEGGLYR
>91267769-3897-4f7e-a1dd-1aca96b813b5 (mRNA) 576 residues [BFAB_07:1624853-1627499 - strand] [peptide] name=Bfab07g04410.1
MMSSLPPSSPRLPSPPPPTEIQIGPKSPSLGSASSNQEQMIEQSIIETNASRRIHPGTKA
ADMAAGPPLIPLSELDSAFQLQEHLKALHYYHTKPPSKDHSIPITRETAVEIATPPNGLD
QALWLYELCRFLINKCNDLIIGFLFDDPPCSAHTCPEMRASEWQFLCAVHESPKSCCAID
YCCHTLDWATNIVTSQKIFPSRLSMAAGDAMDDRGAGVKHLINIFRRLHRIFAHAWFQHR
GVFWQVEGQTGLYVLFKTVCDMHELLPPENYKLPPEAEGLEYVEDKPPVVTSILKTPVGV
EEDFLGLGGRQNTTRRHVRQSPSVGSAITTVQEIDEEEGDITQRLRAARNSRIAEEEGED
GETGNHTKTEIEIPVIVETVKEVDPDDDMEPEETNDRVEEEQLILETIQDLEPELEDAET
VILHDDDSKAGSTGSWDSMSGDSLGDKTEAEQENGDASEEKSETVIEDPIPESEPEPASE
SSSTESNGETEEEQEVQEQKDNSSEDEHTSPPKEVSTTKETPPKKSKKSKKKAKKSAAAK
EASKTSTSTNHINDDTNTTDKEKASDQGGEIGEQKA
>c34f5fa5-6168-421f-ad50-d0b16ddcd04c (mRNA) 415 residues [BFAB_07:1627528-1629809 + strand] [peptide] name=Bfab07g04420.1
MDADDEIPMLVDVEGKEVNAEAKEAKPIKVPITIVTGYLGAGKTTLMNYILNEQHGKKIA
VILNEFGDSADIEKSLTVNTGSEQVEEWLDVGNGCICCSVKDSGVNAIETLMDRRGAFDY
ILLETTGLADPGNLAPLFWVDEGLGSTIYLDGIVTLVDAKNILKSLNEPIPSEIPSETPN
QNKSHASADSTSNEDHEHSGPHLTTAHLQISHADVLILNKSDLVTPEELTIVKERITAIN
GLAKLHITEFGATPQLEGVLLDLHAYDRVDFNLDEVKAKGHSHLDPTITTLTLTTPPLPP
TSVPHLDAWLRSILWDSRIPSSTSSPSPEIHRLKARLPLTNHTTKTIQAVREVFEILDDV
SPQTTPATTTAPPTNEMESDLHSEGKIVLIGRNIKDMQDVLLESFLNCVVEEKGC
>5317eb8e-ab4b-4004-861b-f993ac4b72a0 (mRNA) 847 residues [BFAB_07:1631187-1633932 - strand] [peptide] name=Bfab07g04430.1
MALSPSISPHTTTTATTSTSTCTSTSTSTSTISKPPNSSFLAGHHPKSNPKANSNSVSVS
NLIDASNVQHRIVPSSLAHKSHPAHISTASTPKSTCTSASASTTTTTTTSSSPPASSSPP
PLSDRSIREGETGQGLTRDSSDFSSPVKLSVRPLTFDSKSSLILRESGSKELIPRTSNNT
PSHKQNRQSTSSLRQNRSGLFTLAVLARDKTSNAIASLAEPALRSRPSPSNTLDSPPDQN
TPLNSIKNRSPSAEVTGSSIDRIDLSSSSSENSTSPTPNTTSENSPPSHFLGRRQSLLGT
NPPSQAYSNTAADTPPLIHSNHRTTNSSKMHQTSSRLLRMTSDDRPFTRDFKDLFATLVV
SLPLAGHRIRLTRVEHSFLSEEAINNLGSLKFSQSNRMPDPKDPSRIVTTTTTTTFSMAR
EMARSVCQRFLDARFIESADGKQAKDFTMKGSIWQLTPKGIHILERFCSKNGIQQRHVAE
LVASPRNTMQLVILERDSATDKLSSDRSTIEVIFRRFVGQNGPNIKTSTTTADSDSLSEY
KDGIAGVRMAGERKVGSPPRTVYQTFTGKAACDWLMDCCTTVDRRETTEVASLFLEQELI
WCVQPDRQYQQQLPPSDDKKDFRFQPTKYAYYQLSQKGKDVINMTSRDRTSESEGSSAAV
RAGVSRDSNTQKLDKILNDAALRLLFRENLRDTHCEENLSFYLDVEDFLKSCKAAVRNVD
PTRGKSGGSLDSVKETMASAYGIYNAFLAPGSPCELNIDHMLRNQLATRMTKAVGQDAAM
VESLKEVTKLFEEAQLSVFKLMASDSVPKFMKSSKYEQTLKNYDFDSISPNGQRYNLPER
SASKSNR
>12e6f6dc-7d17-4b27-9c87-265867c384c6 (mRNA) 297 residues [BFAB_07:1645986-1647868 + strand] [peptide] name=Bfab07g04440.1
MHQPTLLSLAFLLLPLSTIVTCLESNSHTDSGSGSETSSGTSNGNLNPNGNSNANQNQNQ
NYNTNENENYNSNTNINTNINNNYNINYNHNANYDIDVNDNDSDDDDKKDGVVYTTEIVT
ALTTYCPKATVIEQNGIAYTITEASTLTITDCPCTQTRALPGIALTPAILPQSPLSTIVP
TTASLAALTTPSSLPAAGILPLYPLSSLPASILPQSLPPVGNADILTASVLPSVIPAATN
PATIDESAFGATPSEIGDVAGDESGPVQFLGAAGRSAREVGLGGLVGGFGVVGLLVL
>ad445575-7394-43d5-81bd-19391db9e52b (mRNA) 191 residues [BFAB_07:1648119-1649155 - strand] [peptide] name=Bfab07g04450.1
MFQALKSSMTDKVQSPPKDADGNPSTQEKVLSQINEKIKAAQEATEKASANREEASSLPD
SEDAQEAKAKLLEEAQKLEKRANSELKIAQRLQSGVWQGGAGGAGIGAGVGMGLGTVVGS
VVGGVVSVPTTGLGLLAGVGAGAAHGPWFKLPKIGGEEGEAGEADEKMAEGDIKKEEGEM
KKVEAEAEEEK
>2ddae720-ae5c-40a4-8a3e-68d16f4a9e0b (mRNA) 551 residues [BFAB_07:1649336-1651778 - strand] [peptide] name=Bfab07g04460.1
MTESESNIHHANGMHGPTGRSDARHPSILHPDLEIRSSDELPDPNELELEEELDGWHGYI
EWEKYPERKQKVKEFMKKFKFPSAPEFQLVPLPKTNPVLEGVRWKQYHYALGRKTKDMPA
ESWLFVEKEKSPDMIHVLQFPYNGEPPRNRLVESAITSNEDHFVRNHGGIPEIDEDSYFF
DVAGLVNNPKRITLKDLKDETIFPRQSNVVTIQCSGTRRIEQINQYPGDGDELINAPWGE
GAIGTARWTGVSLKKVIKYCGGLKDPSGTYHLEFLGADTYFKKGEVYNYAVSVPWRKVKI
NEVLLAWEMNGEPLPKIHGFPLRAVVFGYIGARSCKWLTRINVLPHESLGPVQKKEYLYY
NSQVGKHNATYSSGFSIQDMPVSSAIMSPIGMDQIVHDGTIKMRGWAYSGGGHWPVRVEV
SGDGGNIWYEVPYENLSEKYYHAWRLWEIDLPVDAEGWLELVVRCWDNSMNTQPTFVRST
WNWDLHVTSSCHRIKVFSINKSRPKTAARLQMYEKLGVPFLPITQPGPFELEEDDAYDAE
MEARGGRDPLE
>202b414d-17d7-4a8e-a5fe-43a8f6caa0e1 (mRNA) 366 residues [BFAB_07:1652192-1653726 - strand] [peptide] name=Bfab07g04470.1
MREVIVQPSPEIWTEITEVEIPQPGPDDVVIKVVVAGSNVKDWLHLKALKKSLNSGDAIA
GFVHSIGTHVQTKNEYSLGERVAAFHPMMNPHGAYAEHAVAPIHTVMKLPDIITFEEAAT
IPLVATTAALSLFRRQHLPPPWSPRADIVPLPLIIYGASSSLGTFAVKLARASNIHPIIA
IAGGSSWHLNSLLDPSSGDKLIDYRLGTEQMIKATKVALGSLECHHALDAISSNGTWIPV
SHMLAPSFSPQSPSYLSVVTGSNKYDEESIQTGIEVVYTMVGTAHTGVYKPDMVKQPSDK
EFVKGDPEWVAVFFKYMSQMLEDGRLTGHHFAVIGGGLAGVGEGLRRLQGGQARGVKYVY
KIGEVE
>35635e5d-a5ef-4601-8158-c6c716e68ced (mRNA) 553 residues [BFAB_07:1654298-1658038 + strand] [peptide] name=Bfab07g04480.1
MAFPPTWQKFKDFISPTKQPIRAAAVSQTSRPIPRKAAGRPSSSNCKREPIIITTKDVNS
KPKKIVLDIITKAAGSNWVFVAMMAIVLVWVIFGFINGTTDTWQIVMQNASSIQVYLTDI
LLLRQASNASNSLITTLAELQSRNQTFERLLRQIPGCQWVETHKNPAQKVFKDDEPVESN
VGNSLLTSGDRNTSKARYMWNNTCKTVASGLGSIWAYIIYWIGILFWVGIGPIFQFSDTW
QLYVNTATAVALTFTSVFLQNIQQQQEDNLEQCLEYALRVDSEVEWRLREIANDYQPNPI
FEIPAPKISWIDRAIDIFADVMGSGVGLLITLIVTIAWIAVGPVLKFNDNWWLIIGTFTG
LVGFIDGFVLRNVYHRDEKVAEEQFEKIAESDDRLLDLLNIPSPYQTPTKPRNFSTRASA
AAGEFCALSGVCVASVGVVFALLATASIMKWSETGQLLCNTPTMIIEGFLLLILIQAHNI
ANAARGEDFQSLLKHRLLLNHFVCELSENSDHSSSSYPHDPDEKFIDNTDFYPIDDDNTQ
DTKISIEQVENRI
>708083cd-7ab2-48a5-a28f-6bf3dcca8b1d (mRNA) 866 residues [BFAB_07:1658710-1661838 - strand] [peptide] name=Bfab07g04490.1
MKRNRTGPALDPNAEDQAGPPPPLEKPLFLESVTQLDSISPPDSPTHHIHRPSKFRRQGS
KILSVLRSLTNGSSSIALDDDYAPLSPPPESVALGKKISMAILKAPPTIVHRTQFKSRPS
LISLDKGVLEFMPDAPTPPSSAESAANSGKSSGPDAKLSTQKTSLESKISQKSGGVSHHS
SENKKIMQKNMNQVELNSAEGILASITEGDSVECPQPVPTVITVEKAASAKVFFETYYNE
VSAKPITPRSLRRLNLENELLNDMISTPTDKAERLQALATAETNHLRQIRNMKVRSTNAL
KGRDHKPSNYEVVKVLGKGSFGVVRLVREKWVPGANESEPSKRIYAMKVIKKSDMLRNSQ
EGHLRAERDFLVAAEGSRWVVPLIASFQDLNNLYLVMDYMPGGDFLGLLIRDNVLSESVT
KWYIAEMILCIEEAHALRWIHRDIKPDNFLISASGHLKISDFGLAFDGHWSHDQAYFHNH
RYSLLNKLGITVEGDSLDKKEGRSVAAAMKMAHVMMGGKERHEKNSDNASDSESILNWRN
RFGNRTLARSVVGTSQYMAPEVVRGELYDARCDWWSVAVILYECLYGHTPFLAEEGGRQQ
TKMNILNHKTTFQFPSRPSVSRRCQDLIRSIIQEKDHRLCSRRYKSRDTTLGSVSSRRNL
DYAGRYVYPNDGEDIKAHKWFREIQWDRIHLMPPPFIPNIKSMDDTHYFDEEEPISDFSE
SVASVQPTVQQITDALKPFNREIQILATEFIERPHDTVRLKRVEKEIDQFAMRDEEKEYL
KRFVRTFGKKERKRPRDRLLRDKEIAPKILELRKKGAFLGYTYRRIDMGMGGRGIGVGDG
SESGRGVVAAGSWRANVWHRARLSVH
>abec20cd-fdc0-4a14-9d2e-ec889c99c99b (mRNA) 470 residues [BFAB_07:1662020-1664261 - strand] [peptide] name=Bfab07g04500.2
MPLLPVAMYGLEVPAGDILIPAVPDFPATFRITMAAIDPTEPADDAEGVKPRSTLKVIRQ
SSVDEEEDSEDDDEDEDSEDDEEANGGPSDPSKSKKAQKQAALKELLASIGKDDSDEEME
DASDKKKVAKKGKAKAAAEIEEESEDESEDGEDIEVEEYVLCTLDPENHYQQPLDITIGE
DETVFFKVTGTHTIFLTGNYVIPDDNGHNHHHEVYDSDEEDDEDYDLSPDEDELELEMDS
DESDELDGARITEVDSEDEEAPKLVKADKKGKNKRSADEIEDAASLDAIIAKAADAEEPK
LSKKQQKKLKKNNGEAAPAKAEEVKKDAAKDEKKVQFAKNLEQGPTGSAAAKVDPKKPAL
GVKTVDGVKIDDKKLGSGPVAKKGNRVGMRYIGKFTDGKVFDSNKKGKPFSFKLGAGEVI
KGWDIGVAGMSVGGERRLTIPAHLAYGSKGVPGIPGNSTLTFDVKLLEIK
>e94e12c4-fc62-472d-b469-426114ce1779 (mRNA) 487 residues [BFAB_07:1662020-1664261 - strand] [peptide] name=Bfab07g04500.1
MPLLPVAMYGLEVPAGDILIPAVPDFPATFRITMAAIDPTEPADDAEGVKPRSTLKVIRQ
SSVDEEEDSEDDDEGSDDLLRALLADNDSGSDEDSEDDEEANGGPSDPSKSKKAQKQAAL
KELLASIGKDDSDEEMEDASDKKKVAKKGKAKAAAEIEEESEDESEDGEDIEVEEYVLCT
LDPENHYQQPLDITIGEDETVFFKVTGTHTIFLTGNYVIPDDNGHNHHHEVYDSDEEDDE
DYDLSPDEDELELEMDSDESDELDGARITEVDSEDEEAPKLVKADKKGKNKRSADEIEDA
ASLDAIIAKAADAEEPKLSKKQQKKLKKNNGEAAPAKAEEVKKDAAKDEKKVQFAKNLEQ
GPTGSAAAKVDPKKPALGVKTVDGVKIDDKKLGSGPVAKKGNRVGMRYIGKFTDGKVFDS
NKKGKPFSFKLGAGEVIKGWDIGVAGMSVGGERRLTIPAHLAYGSKGVPGIPGNSTLTFD
VKLLEIK
>6fb75f47-e879-4067-bb7b-14dc3c661b8e (mRNA) 251 residues [BFAB_07:1664553-1665586 - strand] [peptide] name=Bfab07g04510.1
MSSPKRLRIGVFIPAGCQLLDMSGIDIFFMLSPEYLAACGLPAPLFALGISCTIYYISLP
STGPEVELTANAFLRISKTITDREVQPGMLDVMMVPGPDPRIVSDEDTRSFLKSHAEWGG
ENGERVDVLSVCTGIFLVAQSGILEGLSASGPRALIPRLKKEFPDTKWVDDRRWVVDGNM
WSSGGITNGLEMIAAYIRQRFPGPAAEAVIAMADVGEKGVSYTDGNTKETLWWLWQILKA
VGLGIGKGKKT
>de21e072-c54b-4676-b528-06f6d42f9d09 (mRNA) 201 residues [BFAB_07:1665634-1667000 - strand] [peptide] name=Bfab07g04520.1
MSGSTVSSRSSSSASSRRYSNGTPGSSVTSSGRPRGYRGGGHEIVRSAAVEQVREDGHED
DSEDEDLNEEGETEEDEEGEESEDEDEDEDDKDKKKVRSSSRTQRVSSFSSMTNFGVNTG
MHILIINCRPDLLDEEEEEEEEEEEGKEEVLPIARQQIPLEDPTAHRESMGGEREARKAR
RVNAEEKPKRKMEKDRDFGEK
>b7c8aef0-2de9-43ad-9fdf-8df24747b1ef (mRNA) 587 residues [BFAB_07:1668621-1670876 + strand] [peptide] name=Bfab07g04530.1
MKPFRLSKFMTIPPSDERELLKTVEADDAPFDSEASRKSRVKHQKVKTGCYTCKVRRVKC
DETKPSCKRCKKTGIQCEGYPSRVIQRPSREYSNRMSIVESPPRSQSPIVNIHIGPILEN
EQDYRYFQYFRETSASDIARLFNRTVWEQLIPQASESEPFVSQALVALGAFGKGRTSSGI
EAFLHRQYGLDQYGKALVGMRQALIPSSYNARKALIACLLVYSIESIQGHLATAASHAAS
GENLLHEIMLDKKSKSLPPFSCQQDSTIDGDLCRAFSDLDLQALCVIDRRSSKLHERRTR
DLNHLLLSMPSSFSSIKECHDWWQIIMRRNFHWIATARKTILEERPKNDEEPVVYAADDE
GLDLKDENCSWTSVAVIPSTNPTLRRDCTTYLNDILRWESIAAPLVNKGLRSAEDSREFL
AACLAKIQAAMMMIQVSSVFIVNAIEWDAYFQEFGTIMEYVAKLRPRIVQGEGKYHFDFG
VILPMFMVGTHCRNRELRDQAIDTLREAKGYREGIWDSDACSRVTGFTRDVEEEWADENG
WVPGERRFTITGTKVTVDKGKSLHISGYQKNGTLEGKGDFKEIHITW
>acc1a1c9-ef1a-4bb4-bf87-8ee8633596a1 (mRNA) 386 residues [BFAB_07:1675520-1677474 + strand] [peptide] name=Bfab07g04560.1
MLPPPGLEPTSTSTLLNDVSPTSIISSAIATSSALLLDLVNPASTTASIIATATDEDSPD
SDNGECQLLGNFAILVQGSLGLLAVMALVYKRWRERPQRPMKIWFFDVSKQVVGSVLVHI
ANLLMSMLSSGQFSIKVDASNVSRRAVDESGQYKPNPCSFYLLNLAIDTTIGIPILIFLL
RILTSLFIMTPFGNPPESIESGNYGRPPKAFWWFKQSIIYFIGLMGMKLCVLIIFLVLPW
ISRIGDWALRWTEGDEALQVIFVMLIFPVIMNATQYYIIDSFIKNQKPDHELIPDEDSDS
DLEGRDGRYADPSGSSDGIQSEREEDDEVLAKAHKNTGPETPRSKRAGLRSGNKDYDPLY
DGESSPTVVGSTSSRPGDDGDSTTKK
>807a0842-77d7-482c-a381-a5f1dd63814b (mRNA) 452 residues [BFAB_07:1680367-1682403 - strand] [peptide] name=Bfab07g04570.1
MAEITKPLLLICSNPLSGHFAPCKIIAKILIGRGYEVTFLTGSKFGPGVEAIGATFIPLE
GYSSFNDSPSGLAERWPIRETLQAPARTLFDFEHLFLNPMPSQFSSVQKALKLMTDKNPG
RPIIMLQDIIFCGGFPLLAGAPGIKPAAVISLGIAPIVLASPDIPPMGSGLPPDYSPEGR
ERNIAMHAHMQNGPFLPITQIFHHQLEVCGAKRPGMFFLDAAYLLPDRVIQLCAPSAEYP
RSDLPKTMVFSGGLPKGHRDVVSTTHPSWWDEVTTNASKKRIVFVSQGTVALDYGDLIIP
TIEAFADHDNTIIIVALGLKGASLPDSVTVPKNAYVEDFLPFDDILPYCDVFITNGGYGG
FQHGLSNGVPMVMGGDSEEKPENCARGEWIGVGVNLKTARPDAEFLRGEVEKVLSDQKYK
KKVEEIKKEMESMDPIAIIEAQIEELVKEKSA
>03086b43-4ea3-49b4-901a-beff3e780dab (mRNA) 410 residues [BFAB_07:1684004-1686106 - strand] [peptide] name=Bfab07g04580.1
MGEMIHLKLQPVEGNSVPSAPSTTSTPSSSKSTAKEQRPRSIRSIWSRLPFPYTSEDWKV
IMDEVKKLYLTRQYTECAAQCTKVLNSITDPYRVHPLHSLFLSFYCATCLETTASELTNN
SPEKLSLLQDSLSYLQKAEEYITYADIPIQNNGSLSSNRPSSTSSTSSTSSTSSARSSVD
SVFSSTSFPYTTDRLSPALSSYSFESVDDDKNSRHSRTFSESSIASMQSTQSTDTTTITP
NKPAPLRIKKKVSFSPVLPTLISDQSLDDDFETIPRAIPSPTTPSRPIISSKYQSPSPAY
PSHNTHLTTYNLNLSSLTTQLTYHITHINNLIDTIQNVRKSRRRNQPSFAPSLFNSPDGL
SDEDRAEMERRDIRARIEKLRSGGWEKKRWDGSRYSALREKVDNEMNGWI
>af312a2a-0168-45cb-9f80-ed69b8d32659 (mRNA) 630 residues [BFAB_07:1686482-1688958 - strand] [peptide] name=Bfab07g04590.1
MKVFQTQLLRSARSSRLSRLPQLLRIPNSRSAWAPATALSKAERKRYYEELNMAKGPKFE
LKTPKGTKDWQGKDMVIRDKIFSTITEAFKRHGAVTIDTPVFELKDILAGKYGEDSKLIY
DLADQGGEICSLRYDLTVPFARWLAMNGSVQSIKRYHIAKVYRRDQPAMTKGRMREFYQC
DFDIAGVYDPMLPDAEIIRVATEVFEGLGWKGRYTIKLNHRKILDGIFEVCGVPEDKIRT
ISSAVDKLDKLPWEDVRKEMTEEKGLAEDVADRIGEYVVQKGQKDLLSKLQADEKLMANA
SMKAGLEDMDLLFGYLEAFKCLENVSFDLSLARGLDYYTGIIYEVVTEGSAPLVSTSAAT
AAPPKSSKKPKKLADADEDRSSDPSVGVGSVAAGGRYDNLVGMFAGKGKQIPCVGISFGV
DRIFSITKARMEEEQTAEQVRNNDVDCFVMAFGGKGFTGLLKERMSICSTLWEAGIKAEF
LYKVKPKLPNQFKAAEVNGVPFSVILGEDEIAQGKVKIKENGLRDGHPEKDGVMVNLDAL
VSEVKQRLKRKADIDNMTRKADGLRVVGGIKDDKAKIEPVPAEAPTSEASASNPTDSAPS
AEGVEPASETEKPAEESPLSQEAIGAVPAS
>f16d35ba-506d-44e6-ac53-468d162acaba (mRNA) 665 residues [BFAB_07:1689205-1691717 + strand] [peptide] name=Bfab07g04600.1
MAPHAGFDTDQIKDKARKDLLYLLEGVRGKKNLVLEKSLAGPLGVIVKFSTLQDYGVDKV
FFLENGNADVSQQNVVFIARGESAKHAQSIADHIKRMQRESQTGHEFSIFWVPRRTLVSE
KILEEAGVLGDTSIAEFPLYFLPLEKDLLSLELDESFEDLYLRKDPTPTFLLARALMLIQ
QKHGLFPRMTGQGDNAKRLADLLLRMRQELIAGEDSNESNKLGLSPSNTVESLIIIDREI
DYATPLLTQLTYEGLIDEAVGIQHNQADVDSSIVGSAPQAPQGSSKTVGAAPIQAKKRKI
VLDSSDKLYSQLRDTNFAIVGPLLNKVARRLKDDYESRHGTKSTAELRDFVNKLPGYQAE
QQSLKVHTGLAEEIMKHTRTEQFGKSLEVQQNLVAGADPSSQHDAIEELIARDAPLSEVL
RLLCLESCISGGIKPRELDTFKKMILQAYGYQHMLTLDALEKLQLLLSRTSPMASMIPMT
GAGAQAGANTDYTYLRKQLRLIVDEVNEHDPNDIAYVYSGYAPLSIRLVQCILQKQYITS
MTRGGNANNTASVATGGSSQGWRGFDESLKHVRGQTFDEVQKGEDKAVKARALLTGSGEK
KTVFVVFLGGITFTEIAALRFIAKQEGARKQIIICTTSIINGNRMMDVAIEKDSLGRSSV
PDVTL
>c8663549-6474-42db-9c78-1a7af037fa6d (mRNA) 1076 residues [BFAB_07:1691934-1695895 + strand] [peptide] name=Bfab07g04610.1
MATTMDAQISQQDDLGHDTLMGFQELDSHLAIFESTENRRDSSTPGTISTPGFDATIDTI
ESQPAFENFEHTIVVDTSTDHFQSDIKSRARVIKDPKPSTNGDKNRAARQLKHASDGNIH
LQPESARDSLASSMTTDHDDGSSSLSSLSSHPNSPTVDKNSGVVTKASSLDGTRPKYNVR
PKESIPTDVHPAEYARQCIAAAESSRLSPYTLHPEEYHMLRRHISHQQVTTYLNIRNGIL
RLWTRNPSIHVMRDEAIGCARDTRWFEAARVCHEWLARRGYINYGCLENPESKIDKSETQ
KTGPRRTIAVIGAGMSGLGCARQLESLFAQFEHRFHEMGETLPRVVIVEGRDRVGGRVYS
HQFASRPEYPTLFPGSRYTAEMGGMIITGFDRGNPLNIIVRGQLALPYHPLKPDTTIYDD
GHPVDLQRDQQAEKLFNYILDRVGEYKFKIPLPPLVDGDRDHLEAGRDGNGDGSRTISEV
ENRASVAPQSAASERSSAAEEMVPVASDRLTGRAHLEPGVPAVHTAAYKAREIGWQLRDG
VGIESDLDLERSTSKENATLGSVFDDAIRQYMRMIDFTPLDLRLINWHVANLEYSNAITC
NKLSLGGWDLDAGNEWEGKHTMVTGGYQQVPRGLLNFPRLLDVKKKSAVKRICYNPHGTI
SSSRIDCENGESIEANYIVSTIPLGVLKQNKIEFEPKLPSWKTGAIQRIGYGILNKIILV
FKEPFWDQGRDIFGTLRNPPNKSSLEQGEYFTHRGRFFQWFNCTNTSGVPTLLALMAGDA
AFYTEKTSNEELVTEATTVLRGVFGDHIPMPVESIVTRWGQDQFSRGSYSYTGPNFQSDD
YGVMAKPVGNLFFGGEHTCGTHPATVHGAYISGLRAASEVLESIIGPIEIPERLVLPKES
ASKRKAEAIEVPKDPKQARLEAYEIEIWNAIYAKLGDRPWKPSKNHSNSYQMYSKDTWEE
AKRKCEEGRRPGKGKPITNEVKKMITKMWNEAPEDIKKPYIDKALERKHIYQEAITDYNV
KSSKWDKDAWDFRVQYEKDHPSLPGPDEDIGSPWRRDRRAKRTSGYAEDSESELDL
>fd0c755f-fa2c-4291-8c41-315f644c1764 (mRNA) 283 residues [BFAB_07:1696005-1697375 + strand] [peptide] name=Bfab07g04620.1
MAEVDQFDSALDLLRRLNPKHTTTHLNSLIDLVPSLTEDLLSSVDQPLTISRCRKTGRDY
LLCDYNRDGDSYRSPWSGEFETPVGGTTPGGIDDQGNNDGAGEGAVPSERVRKMEIRANE
AFDVYRELYYEGGVSSVYFWNLDDGFAGVVLLKKVAPSSNSAGSWDSIHVFEAVDRARTA
HYKLTSTVILSLSTNGNELGEMDLSGNMTRQIEADLPIQDDAEHIANIGRLVEDMELKMR
NLLQEVYFGKAKDVVGDLRSLGSLSEGAKERKVRGEMLDAMKR
>a255a020-9199-41a9-a230-7f243323a722 (mRNA) 379 residues [BFAB_07:1704422-1707522 + strand] [peptide] name=Bfab07g04630.1
MAEKPAVLIIGGLGYIGRFLALHIHKNNLASEVRIVDKVLPQLAWLAPEFGDACSSTKFM
QADASKEQSLPRIFDRADGKQWDYVFNCGGETRYSQEDEVYKVRSLALSIAVGKEAAKRG
VKAFVELSTGMVYKSDSTPSKEGDKLKPWSKIATFKLQAEETLAEIDGLNLIIVRLAHVY
GDYASQFVSTALTMARIYQHLDEEMKFLWTKELRVNTVNINDTCRALWAVAEWYAVSGKP
NWDAKSMGKIPTFNVVDKGETSQKTLAELIGQIFGIKTGFQGQLISTFAKMNLDSVVDDI
NEEVLGPWADLLEEAGITRPGPLTPFMEKELLKDTDLSMDGSRIEKVVGFTYEHPKITKE
LLQGMIDSYIRIGWWPVAK
>8e4a3b2c-4252-4dc6-b377-cdee995ae164 (mRNA) 672 residues [BFAB_07:1707780-1711324 - strand] [peptide] name=Bfab07g04640.1
MVPRISEPQLRPEPHRAPSNSTKLSYTSYSSSFEADDERSSSADHDSMGPDIGSAHRDVP
AQYAGEDTRLTSRKELSGWYAYGFAAEVFVICGIGSFIPITLEQLARENGVLLSDPTQPC
GSSSTHLPPGLNPGNAKDSQCVIYIGGLQINTASFAMYSFSLSVLFQAILVVSISCAADH
GNYRKRLLLFFAFAGSITTMLFLTVVPKVYLLGALWAIISNTCFGASFVLLNSFLPLLVR
HHPKTQYGTPDFSPELHPSFVDEYPPEHSLGESEVEVYDERSALLSHNRTLSEAPDVTEP
LPLSADSTSIELQLSTQISSTGIGIGYSAGLFLQCVSIIIIWLLKGTTFSLRLVLFFIGL
WWFLFTIPAALWLRPRPGPPLPSTGNRNSKGSRSWLAYTIYAWSSLFRTVKLARRLKDIT
LFLAAWFLLSDAIATVSGTAVLYAKTQLRMAPEALGLINVIATTAGVLGAFSWAAISRAL
NLKPHQTILACICIFELIPLYGLLGFLPIVKRWNVIGLQQPWEMYPLGFIYGFVLGGLSS
YCRSLFGELIPPGSEAAFYALYAITDKGSSVFGPAIVGAIVDGTGEIRPAFWFLAVLVGL
PAPLIYFVNVERGKEEGARLAEIIEGFRIKDAEIASGEHSSRESISEDERGRDHREISPH
DEEREGRRRNDI
>7bb7aad1-af9b-4d5d-9bc4-70fa2cdbb12d (mRNA) 1179 residues [BFAB_07:1711647-1716814 + strand] [peptide] name=Bfab07g04650.1
MPGVIMDSASRNGSHTNHDRDRQFNGPNGEAKASDKGRDKSQARSEPQQSMTPISPAVRN
GMNGNSTDGPAHQQNSGEEPIPKDILDRIHDLPPEVEHITSNFLPLTELLNRLAQATHND
LRQEIMKLANMPIPQSAMNTNPPHITKEDDTSNDNVNKKVSLLNFAQTQHSRWVKQLVLL
NWSRNAEEVSKIIDLNIHLCQKRGLYQYILHHMSEVKRKLCDVDSPRPDLKTALEVLSTG
KANWMPDLGYIAPPPMTPKEILKSLEKLNTLLSIRLNLHEYDKIPLQFKNYTIKSGRVTF
KVAGEFEIDLTVADENQELQFWFIDFRFLFSPSLSELPPRHQYHIENKVNAALEKDGLSG
CYNYLHEMVLTHKISEFRRQAVELSRSTWIDGVKVEPLHRALCIQYWLDRYKKNGPRSWI
ILGVHSGRRKDGYHDPKSTSRLSIRWFRDSKEVKDVDIPFDTVNISAEQLLKTVIAMHVN
HILGSTHSKLAAESIFANREASLSLHTSKTEPKESVLGVQLTEKQHVSITIEPVTGIFIF
SPASRIITSSQNKLNSLDRDPAMDAHFNVENLRCLAISEELTILGTSVGWRRADNPGISR
EDLKRKIPKDTKQISWFRRPGWQEDWLVAVTLGMSGENWWLFQISKQSTGVKVLASIHIP
IKAASPTTSYVFMSTLHIFAGGLISQYTNLKALHDRRIRHTVRQSALLSPVKLPSIWIHI
PGLFQARAKPTAHKTWATDFLKLDFQGLEPISNPLSVLSQSPIDDSQAIVPKPEQKTILV
TVARMAVPIPALAVLNEKIDQDIAFQSKTGEIAFRLRSQVGESIIPALTERLFQIERLIS
CTAVLRKHENVIKCDRISLQEIAFSYGMPPVAQTGLVTSADKTTPLSYKAVVSLGLVEGK
MKLTLEMGNPHIRVLDSLDKVLNIAKSGFDAVATLLPQTLYSLRAFETIENAWASLYDKG
EVFVFVRAFEWFRLRYVFKPSTPNTPPRTVSFEIKMCHRKQKPWWLVRRTEKIDKSIRGD
AVPDDEIDLRLKSVWDSRGDDDWKGMRTSAVGRNRGIETCLEKIDAVMRDLSPEDLAVQP
SQQSQTNTQVQAVGPQGQQPSQSQQQRQLQLSTPTNSQNHPQSQGSSQGQQRMPTPNMNM
NLNMNQNMNQNMNQNMLKRKSSGQAINPRAVKREVVEID
>f349c1df-4830-4be2-a147-28fe9c7a7459 (mRNA) 774 residues [BFAB_07:1719956-1723735 + strand] [peptide] name=Bfab07g04660.1
MTSIIRMLSPATDRNGNTGRKGQDVEPEPEITPLVKMLQNAGPIRPDGSDKFFGLENFGN
TCYANSILQALYYSVPFRENVVKYPPHSPSDTPNGHLPKLIVPTRASPPNGVPLSTAKPK
GISAAEALKRRQAVNSGQPGPGAPGTRPEDKPDSPEYKKKHAMMTGPILEITTEHASSYG
MEETTFTALKDIFAAMISHPSRTGVVSPQRFLEVFRRDNEMFRTSMHQDAHEFYGLMLNA
VINNVEDNARHLKDSVALQEKEGLNDSMTAAVRSVADSMGLASGAQSPGTKWVHDIFEGK
MVSETKCLTCETTSQRDETFLDLSIDLEKNSSVTSCLQKFSAEEMLCEKNKFHCDTCGGL
QEAEKRMKIKTLPKVLVLHLKRFKWTDDLTRLQKLFYTVNYPYHLRMFNTTDDAEDPDRL
YELYAVVVHIGTNAFHGHYVAVIKTEDRGWLLFDDEMVEPVDKSFVRQFFGDKPGQACAY
VLFYRETTVEAMRRDQEAEGLDLIASASDVADISSGQLQQNGTSLSSNSKQVLATPSTPI
ESDTNGFGSLDHALTAPLVASSISGNPVPTRVPSSPLDTFKFKSKEEKGREKKAEKEAEK
AEKSRKAAEKAAEKAAAKERKEAEKATKDAEKASKVAQEAETKKAMALSKQTGIEEIKRR
QSEANIQKENNGNSNEKNDGKGFGSLNLNRSHKGSKSMSRKSFGFLSKNGEKEKEKNGEK
SEENNNIPESSNNMAVEGTAGPQTPERHEKVKNARFSFGLGRKKSNMWSPTVDN
>51ee895b-c8b4-4395-b0d3-2f69d32b2e49 (mRNA) 85 residues [BFAB_07:1723899-1725198 - strand] [peptide] name=Bfab07g04670.1
MFFIFGNLIYIIVLLTNAVAILSEDRFLARIGWSNSVAEPAFGGNSADTSIKSKLVNLMT
SVRTLMRIPLIGINSVIIIYELALG
>2f8da973-ab15-4db8-b40a-7f0d1e0ddd7f (mRNA) 631 residues [BFAB_07:1725371-1727677 + strand] [peptide] name=Bfab07g04680.1
MKGIDILLTLSLPTLILVHLLIAPYTKVEESFNIQATHDILTYGLPISNISSTLDTYDHT
TFSGAVPRTFFGALSLAAVSKPIILLTQGKYAQVIVRGVLGLFNAACLIRYRNGLTGAFG
VDVGRWYMALQVTQFHVLYYASRTLPNMFAFGLTTLAFTEFLPATGGSRPRVGILLFVFA
GVVFRSEIALLLFTQLAYLLVLSRISLKTIIPAGIQSAILALAVSVPIDSYFWQKPLWPE
LAGFYFNAIQGKSSEWGTSPFLHYFTSLLPRLLMNPLILLLLHPLALTLPATKHTSKDLI
VPSLLFVAIYSLQPHKESRFIIYVVPPLTAAASLSASYIWTRRSKSWLYTFGSLALLGSV
ALSFVASSAILMISSLNYPGGDALSQLHTHILKDLSRSPRTQRTQDRNITIHMDVLSCMT
GITRFQQYPSLPLRFPQNQNITLNYDKTEDSPELGEAAFWMKFDYALMEEPGLAIGKWDV
LDTVFAYAGIEILRPGDGSSFSERLEGVYRANNVTVGEEGEAPSAEDVKRIEEGGTQNVE
KNREGKGFLDLKTKLMFEEMNKFGTYNLLRDAGRLVTGGWWIGPRMEGRIRILKRIGDEK
NWKEEQEEQREKERLKEGERETSEGVATGAE
>13c5e49b-ec67-4cdc-9c86-274995e9583d (mRNA) 297 residues [BFAB_07:1729768-1731108 - strand] [peptide] name=Bfab07g04690.1
MLSRTARPALRAAVAASARPVAPQAAGYATLREIEDRLKSIRNIEKITNTMKIVASTKLT
RAQKAMRESRSYGESSNSVFEHAETKALESDKKRLIVVASSDKGLCGGIHSGLSKQVRRM
LAADSNADIVVLGEKCKAQLSRSSGKNIVMNFAGVGKDVPTFADAQAIADQIVLLPTDYS
SVQIVYNKFINATSYEATPIEAFSEEAIANSPNFSAFEIEDETLGNLREYALANSLFWAL
AEGHACEQSARRNAMDNASKNAGDMITKYQILFNRTRQAVITGELVEIITGAAASEE
>5a60e08b-bc30-42d8-bd4b-a9aa3e452bbf (mRNA) 912 residues [BFAB_07:1732917-1736870 + strand] [peptide] name=Bfab07g04700.1
MSSSDDDMPLARTNGTNGNVSQGRIPKSVDRAMDKASANAKAAPVGISIRNGPVLDDPMD
VDGPATNGASKRKSRSSIGNGKAVNYKVDGSGSESEEVPLAKRQRTSNKKKVADSDSDDD
MPLAGRRNSKLPPKVSAGAIGESSSDDEPLTVKLSKEKASIEKHAEKEAKALRAKKAAPK
KAIKKEESDSDEDVAPKRRKPNGAVPAKPTTKKANGVKKEESDSDAPLAKRAAPKKVNGK
VKAEPDTKVKAKKDESEEADEVYRWWDAPKKEDDSIKWETLQHNGVVFPPEYEPLPKNVK
LRYDGIPLTLSLESEEIAGFFGAMLNSTHNVENPTFQKNFFKDFTDSVKKTGGAKDKEGN
KVAIKDFSKLDFKPIFEYYDGKSTERKARSAAEKKAEKALKDEAEAPYKTCIWDGRKEDV
GNFRVEPPGLFRGRGEHPKTGKVKLRVTPEQITINIGKDATVPSPPEGHKWKAIQHDNKA
TWLAMWQENINGAYKYVMLAAKSSIKGQSDFKKFEKARELKEHIDRIRKDYTQDLKAELM
ADRQRATAVYLIDKFALRAGNEKDAENEAETVGCCSLKYEHVTLKPPNTVIFDFLGKDSI
RFYDEVTVDPQVFKNLKIFKKAPKKNGDDIFDRLNTTQLNKHLTNYMPGLSAKVFRTYNA
SWTMSDLLKKLKNSDISMQEKIKLYNDCNRKVAILCNHKRTVGASHEAAIEKMDDAVKGL
KYQKWRLKQMILDIDPKQKKKKSADWFALDEELDESWIQEHQAFLVAQERIKIEKKFAKE
NEKLVSEGQKEMKTKELNERLHAATDLEKKFKKENKTKKVEAEGKGPSVDKFEANITKID
ERIANMLLKREDREGNKEVALGTSKINYIDPRLTVVFSQKFDVPIEKFFSKTLREKFAWA
IDSIKDEDDWEF
>a6281b0c-18ce-40e7-abd3-a8c41616b071 (mRNA) 500 residues [BFAB_07:1737384-1739174 + strand] [peptide] name=Bfab07g04710.1
MKPSNSSLRKLNPYVCKACTRRIRSFATTASLSGATSTSIPNKRPDVYDVVCVGGGPAGL
SLVAALRANPLTRNLRLALIEPQSLSKSLNWKPKDGEYSNRCSSLTPKSVRFLKDIGVWE
EVEGTRVQGYGGMQVWDGVSGGRIGFDVEIGGRGEEVVEGEGKVVAYMNENANLVRGLLR
RIEGLGGVDILEGKVADIELGQETEEGDFSGWPIVKVEGREKSLAARLLVGADGQNSPVR
KFAGIESRGWDYGRVGVVATLELEAQHEVGKIAYQRFLPTGPVAMLPLPGNYATLVWSTT
PENAAVLKGLSAKDFIAMVNAAFRLSTVDLKYMHTQSSGQAEEVSWRLQHTPISGTVPAP
VTGVQENSIASFPLKMRHADTYIGERIALIGDAAHTIHPLAGQGLNQGQGDVESLVKGIG
YAMDHGMDIGVRMSLESYNAERYMQNHVLLGVVDKLHKLYSVESGPVVWGRTLGLRAVDA
MGPLKKFLMGQASGTGRKIL
>196db908-0969-4dc3-a7fd-c68d60a30a70 (mRNA) 410 residues [BFAB_07:1741579-1744103 + strand] [peptide] name=Bfab07g04730.1
MSFSGMLNKLHGQPESYDKKAKYKFGRTLGAGTYGIVREADGPTGKVAVKIILKKNVKGN
EQMVYDELEMLQKMKHKHIVKFVDWFESRDKYYIVTQLAIGGELFDRICEQGRFTEKDAS
QTIRQVLEAVDYLHDNNVVHRDLKPENLLYLTQDPHSDLVLADFGIAKMLDTKDEVLTTM
AGSFGYAAPEVMLKKGHGKPVDMWSMGVITYTLLCGYSPFRSENLQDLIDECSNARVIFH
ERYWKDVSEDAKDFIGHLLQPRADDRSTSKEALAHPWLSGENATDHNLLPEIKAYMAKAR
LRRGIEMVKLTNRIEMLKMQEDDSEESDVPGNAAAAASDAIPGSPERKNTGLSSASGSTS
PGEKRSLSKIAKGAIFREVVLAKVREVKAEEAAAQIERQATEAAKKKSTH
>76d714f3-8c3c-427f-9153-320fec64a1cf (mRNA) 434 residues [BFAB_07:1749956-1751548 + strand] [peptide] name=Bfab07g04750.1
MAALNRKYAALPDLDSAPDIYETPELTEDNSTAPTGRLRSQSASSSYQDFDEDDDELGGI
SRARLQPDEARTHFSPAQVDARDVDFSDRVTAKRKSYKASSRRHRKRKDGTEEFGDFSDD
DDGESLERKLARLRREIEEVKEEYGKRNQEKKDMGEEEESNDGDDVASLSKLLDGISVSQ
GEQVTSAGARLARNLGTGIKANGPSQTSQGTGEPATYTVTYAPTYQQSHALAKAADFDGR
LALLEKVLGLNSTMDSTSSSTAVLPTLDILERQVSILTESTPSSLDSISRRVRTLTQEAE
RLEESRKSARDAQDALRSAGGGTAPEDGEDAEQISKINALYGTLPTIENLAPLLPSLLDR
LRSLRAIHADAATASENLDRVEQRQVEMSNDIKKWQEGLEKVEEAIKQGETVIGGNMKVV
EGWVKDLEEKMSKL
>2acca813-ceb0-471a-8a42-777faee682a4 (mRNA) 582 residues [BFAB_07:1747512-1749869 - strand] [peptide] name=Bfab07g04740.1
MDHAKLDLNDRRKTQPRRAGLTKDYPHTLLQSLHRPKREAQPAMPTEAATKTRPSNVNSV
RDSGNVGGAPDSTSCKRKNRRSNKENELGSSESSVMKSIEAGNGNVDRPPDDSDEDGKYL
IDSSEDESPSRISADMTKTVFGSKGQKPIRTSTTSSLPVPHNSRQRPSELKSTHGNKRKN
ESDSEHAPDVNIFGNMQSSNKKLKSYTKEHQDQTRTSKPGVKKLVLVKDTKPKNKPNKPY
MYGKKKNAAPVNQFINYKSRSPSLVSDNEKQKLQDYTTDSPTKNKSPARGFVRPDFSDDD
FSDLDLFSKLKSSKSAPPSTQSRPFQRYDDDDILDAAEELAKELNPDTIIGMENLEREDS
SDADDYTGSRCPMCNEPVAAEDLEALGKMNTRKQEKFCLSHQRKTARSNWKSKGYPDIDW
ETLDSRISNHHTFIKKIIGGATCHYREVFDEKVKAGKDRNLMKSSTNLIPGYYGSRGLRL
ISENIMDEFTPLLKYRAPLDRLIAARSAAAFVDSVVVPEVTVLLIKEDMNVSDEEARTIL
TESSEMGDLVNEEIKDVVTLKPQDKKSIGNSDDEDDDNDFNF
>8619ff1d-847e-44ad-8a57-7f20636e0fa1 (mRNA) 546 residues [BFAB_07:1751744-1754612 + strand] [peptide] name=Bfab07g04760.1
MASWSGQPAIKGSTEQMRMAMLTFSLVGLQFTWGIEMTYCTPYLLSLGLTKSKTSLVWIA
GPLSGLIMAPLVGAMADRSRSKWGRRRPYMVGASILVALCLLVLGWTKEIVSHFVEEGDF
NKTCTIFLAVLAIYAVDFAINAVQWSCRSLIVDTLPIQKQQAGSAWASRMAAMGHLVGYA
IGTVDLVAWFGPSMGDTQFKKLILIAAFALIFCVCVTSWAVTERVLISSKDSDSQSGLLK
ITRQIYRTTMTVPPKIQAILWCQFWSWIGWFPFLFYGTTFVGETYFRYDAPHEIKESKDA
LGDIGRIGSMSLVVFSFVSSFGSFLLPLLIKSPDEDKFTQRPPASIARFVQAYNKYKPDL
LGAWFFGHLMFSSAMFLAPFASSFRFATSLIAFCGLPWSVASWAPYAFLGVEVNKMSGLP
SYSRLSATDRDIELESPTAPPSPSLLRLEHGPIGEKEDVASTGELSGIYFGILNIYTTIP
QFIGTFISMIVFSILEPGKSPELAQNAKEGEHHGTEGPNAISICLFIGAISTIGAAYATK
KLRDLQ
>c5f23398-5070-401b-bf8f-e2638f56fd65 (mRNA) 562 residues [BFAB_07:1764325-1766712 - strand] [peptide] name=Bfab07g04770.1
MLSLSQNWRSCIAAFALTFPAINASPVPGQTSSVLSVVSAYNGATTITASTQVITYAATT
TSTSGTLTCTKAGTYSIGTSTTVVSKPTTIPWTAPEVIYEYCPFSVFTLFGCATCPRLVT
VEKCYLGYCEVSVELRTPSKGTTSTSTSAASSTNFIIGIGYLEPTVTTTKALSAYATGYT
STIPAKLLAAGTVIVGSPIPYVTTTTYLDDGSQAYTSTIGGTILDAISVTTITYTTTVSA
YDSAYTSTISAVDSTPGTVIVATPAPYVTSTIYLDNGESAYTSTIGGDVNIGVPVGTVTT
TTFLPTDGVAFTSTVPAAGPTSGTVLVGYVQSDVTTTITGSVAATSTIAPSGTIPGTIIV
TVPTPDVNCNNIGVQFAAFAETPQIINSGANFDPVIYKTQPAKITGNTTAVSYSVTTYTN
TAVSVYGSTQKLNDFYLVIDNRGYLFAQMTGTYTFSTTSADDIFFLWVGANAYSGWTRAN
ANLIATLTYPSQKFTINLVAGEYYPMRFLWANGDGPGLFAFSVTAPDGTTILDGNTVASP
YVVQFSCDGTSAPEYPAWGAEN
>b57887ac-4938-4ffb-9037-e3b5fdc1a2df (mRNA) 533 residues [BFAB_07:1768644-1771046 + strand] [peptide] name=Bfab07g04780.1
MAPPTAIDIEGVVDTEAIVLPDPLTVNGVSARRAKAGKFVAGVAAFTTSDHFKNPSTWKP
KAKRFDHRISLESRSRKPSNLKGAAKYLGPGMISLGGGLPCPDYFPIEEISIKVPTVPHF
SEAQTKESGIILTAGKYDVSEGKGAYDLSIALNYGQGSGSAQMLRWVTEHTEIVCNPPYA
DWGCSLTVGSTSALEQTYRIFCERGDFVLSEEYTFASAVEAAAPLGVKFLGVKMDAEGLL
PEALDEILSNWDEQARGARKPFVLYTVPSGQNPTGATQGIERRHAIYKVAQKHDLYIIED
EPYYFLQMQPYTGPDAPDVPPPANNDEFLKALIPTYLSIDTDGRVMRMDSFSKVIAPGTR
VGWITASEQIVERFIRSNENSNQNPSGISQMVLYKILDESWGHGGYLQWLINLRLEYTKR
RNVILAACEKYLPKDIVSWNPPSAGMFLWLSVDWHKHPAAKTKPIADIEQEIFLSGIDQG
VLICPGSWFTAEKDGFVPVDMFFRATFAAASEEKMTEAIERFGVAVRNSFGIE
>ec8467cc-604c-4591-9c98-4dd06a208ffa (mRNA) 687 residues [BFAB_07:1771819-1774483 + strand] [peptide] name=Bfab07g04790.1
MYQSPQLSWRILAALILGFLSITTATSTPEVIFSESQVTYRGILSNKVEHFHNVKYAADT
SGPNRFAPPKSFTPPPGTIIDASLPGPACPQIKYPMPPFFSAVKEISEDCLHLHIARPSG
LNLNSNSNLPVVVYNAEGGVIKGSNHDDHISPDKLISLSVDDGNPIVFVALNSRLSILGF
PRLPLLKEEKSLNLGMRDQRAAFEWVRDHIQEFGGDPNRITAYGLSAGGTMTSLQVMAYG
GQKGVPFQQAWVMSGPPSTSLNMTSDVTEHHIRAVADKVGCGELVDSEILSCLQDIPMQD
LIDSAMEYSVSYHPPSGLFTFIPSVDDDFLPDRYSTMMREGSFVKGIDMVFGWTQDDGAM
NVGPGHLIQSEEDMITYIKSFIHAMTTEQYAKLFDLYSASDFEEELNNYVLQKDSEDPDI
SVHYFRVSRILRDILFTCSSIDFGYHMVKWTQQTIDPAFTGVRLYDLNQSALTPLWKGAG
MPYVKVSHGSDNNYLFNGVFPEGQLLVREGYGRRSTHECRRSCMSNWLYYSCYITVVIEL
KLFTSFTHQLTEEDNEMSEMMARSLINFAHTGNPISQTISQKQFDEWPESYDEIETENTQ
LESFKIQVIGGPLGTGPVLLTDGDDQDSIKRKLANENIGIWQQVLSGADEFGSMGARENS
ERKRLIGQEKLFQRCKYINSLADTLDV
>367254ec-aad6-4569-afd0-b2ef12daeffc (mRNA) 519 residues [BFAB_07:1775706-1778233 - strand] [peptide] name=Bfab07g04800.1
MLESIPIKALIIPFVVIFVLFKVAQFVQRELKIKSLGGHTRRAKTWIPFDLDLIARSVNY
GMHDKNLEAWMAFFSGYKDVRYTVEANPGGQRTLFTAEPENIKAILATQFTDYGKGEPFH
SDWKDFLGDSIFTTDLDQWHDSRQLIRPQFIKDRVSDLDTFERHMQILIHKIKEEGRKWD
GTQGREIDISDLFFRYTLDAATDFLLGRSVESLEKPGEFADAFAEVQRVQSIIARAGPLN
GLVPRKSFYKGLKVINEFVNPFIDDTLRLSPDELATKTKTEEGYTFLHALASYTRDRNVL
RDQLVAVLLAGRDTTASTLSWTFYELARHPEVFRKLREEIISKVGLVEAPTYQHLKDMKY
LQNVMHETLRLYPVVPFNVRLALKDTTLPVGGGPDGLSPMGILKDTPIGYSTLIMQRRDD
LTPDVMSFNPDRWFTWQPKPWQYIPFNGGPRICIGQQFALTEMGYTIVRLLQNFDGLEGF
MHEIDGGNPQLKADIVLQPGQGVHVGFLERQSETVKEKV
>b97ba719-8003-4343-bec9-a82a2d290132 (mRNA) 579 residues [BFAB_07:1778501-1781928 - strand] [peptide] name=Bfab07g04810.1
MRSSTFLISALVSSALAIWPQPVSYTNGTGVLWLDKNVKVTYDGGASTGYSSSGTGNITT
SKTIVSKAVTRAMNKIFHQGLTPWKLYPRNALPLVEPSATSNKSYISEILITQTGQDNSS
TFKPTDGQVDESYNLTITTDGKASISAPSSIGILHALTTFTQLFYTHSVAKAGVYTKLAP
VTIYDAPKFAHRGLNMDISRNWYPVEDIKRTMLAMHYTKCSVIHLHITDAQSWPLDIPAL
PELSKLGAYATGLSYTPADLKEIQEYGVELGIEVILEIDMPGHTSSIGYSHPELMAALFA
EPWDTYCAEPPCGSLRLNDSAVPAFLEKLFDDLLPRVSPYSSYFHTGGDEVNVNTYLLDP
TVQSNDTAVLTPLIQAFVDRNHKQVRAAGLTPMVWEEMITTWNLTLGSDVLVQSWLSDAS
VAQIVAAGHKAIAGNYNFWYLDCGKGQWLNFEPGASSEKYFPYNDYCSPTKSWRLVYSYD
PLAGVPENSTHLVVGGEFHIWSEQTDPINLDDMVWPRGAAAAEVLWSGAKDPVTGQNRSQ
IDAGSRLPEFNEHLRSLGIRSGPVQMIYCTQLNSTTCAL
>dbd59e6b-4da8-43e2-86bc-3ddd63d31d86 (mRNA) 599 residues [BFAB_07:1778501-1781928 - strand] [peptide] name=Bfab07g04810.2
MRSSTFLISALVSSALAIWPQPVSYTNGTGVLWLDKNVKVTYDGGAVRSFLPKFYVMNTE
KLLAVQSTGYSSSGTGNITTSKTIVSKAVTRAMNKIFHQGLTPWKLYPRNALPLVEPSAT
SNKSYISEILITQTGQDNSSTFKPTDGQVDESYNLTITTDGKASISAPSSIGILHALTTF
TQLFYTHSVAKAGVYTKLAPVTIYDAPKFAHRGLNMDISRNWYPVEDIKRTMLAMHYTKC
SVIHLHITDAQSWPLDIPALPELSKLGAYATGLSYTPADLKEIQEYGVELGIEVILEIDM
PGHTSSIGYSHPELMAALFAEPWDTYCAEPPCGSLRLNDSAVPAFLEKLFDDLLPRVSPY
SSYFHTGGDEVNVNTYLLDPTVQSNDTAVLTPLIQAFVDRNHKQVRAAGLTPMVWEEMIT
TWNLTLGSDVLVQSWLSDASVAQIVAAGHKAIAGNYNFWYLDCGKGQWLNFEPGASSEKY
FPYNDYCSPTKSWRLVYSYDPLAGVPENSTHLVVGGEFHIWSEQTDPINLDDMVWPRGAA
AAEVLWSGAKDPVTGQNRSQIDAGSRLPEFNEHLRSLGIRSGPVQMIYCTQLNSTTCAL
>9c3dc53a-4e2b-4bec-8186-e327b4ae9e68 (mRNA) 504 residues [BFAB_07:1782459-1784608 + strand] [peptide] name=Bfab07g04820.1
MSVEVVLDSPLAHALNASIQPKLVEVGWSTGGADDSALSEYIILMLVNGKTQEQIAAELS
GDLLNLGDDDPGARDFSQWLFNQVGLLNSQISGGGYPETGAETEQAQFGESNVSQDADMN
YASEAGDINVPTGPKSMRNGSGGVSRPRDKRMLNHLTKAMDRTHDAALHRVRPQSGNERI
NTHARGPPTGPRGPVNIRGTARMQNGRGHGGMGGMPTQHGAAQNIMGMSQQQQLELYAML
EQQSRLMAQMFTPQQQQMMQRGGNGMGSGFPGQGRPLHERMQHPNRSQNNNFQKRHEHQP
QSQNDNSMDVEMNSSDKVDSLSPDTTCRFNLSCTNKDCKFAHQSPAAPPGTAIDVADVCT
FGAACKNRKCVGRHPSPAQKIAHQTTQDCIYFPNCKNTNCPFRHPTMPLCRNGADCTTPD
CKFTHVKTMCKFNPCLNPTCAFKHEEGQKRGKFDDKVWVADGSKEHVSERKFVDEDGNEE
LILPGGAASADTGAGRSGDAEVAE
>0e545d73-6e9e-4124-ba3a-024873efb31b (mRNA) 617 residues [BFAB_07:1784916-1787119 + strand] [peptide] name=Bfab07g04830.1
MIITRMRLPESPLLAPLRRCYNIPQCQVVRLRRRNVLGSCTRAYSYQTRPQLHTRERSKP
LLKYYSSHAPSNPPTRKSAEVISENKSSEEWKEPSVAILGGGITGLATAYYLTQMAPHLK
VTLYESSERLGGWLRTKHIDVGDGEVVFEQGPRTLRPNTPAGFVTLNLIRDLGLSDEVIK
TNKLSAAALNRFVYYPDRLVCMPEPSQGIYAIAWKMLTEPVFKGMHRLLFEYKRPRRPAE
LDDESVGSFLARRTGGTEIPDNLVSAVFHGIYAGDIYKLSAKSIMPSQWGMEGAFGSISA
GISQMAKFKNATAEDADLEEKERSSFTDNERAIINETSVYTFRRGIGTLSEALDSSLRNN
PNVKIKLGEDVGKIEYDGQSEGIKIYTTQAGESSANHSYVISTLSGRTLSTLTTPSDDSL
LPSLAKTEAVTVMVVNLYYRDEDLLPERGFGYLIPRSIPFDQNPEFALGVVFDSDATVGQ
DTVPGTKVTVMLGGHWWDDFETYPSEEEGAAMAKAVLKRHLKIDQEPEMVHASLQKDCIP
QYTVGHEQRLKQAHYELLSAYKGRLAVAGNSYTGVGVNDCIKAAKVVAGDVARGNDVTGL
EKFAEQKWWEKMIKREQ
>68961077-804a-40cc-9bb6-633f821c4a7a (mRNA) 251 residues [BFAB_07:1788090-1789344 + strand] [peptide] name=Bfab07g04840.1
MKKDAEFVKKWPTLGKAIESGIESHDGREAQLLAYMLSHNPTHPLDVLSTIDEFSLREDF
LISVGPNKADILRDLIMREKPRMLVELGGYLGYSAVLFADAMVKAHGGDEGLKIYSLELD
PICAAIARQIAQIAGLDHIIEVVEGTAASSITNLVKENKITSVDFLFLDHLEDLYEQDFK
VVEALSVLKKGAVVVADNVIRSGAPEYREFIRADMKKEQGWESRGVKGLIWPGNFEDELE
VSKLVGLEVDD
>4128c607-1eef-4f5a-af07-a17f937d7607 (mRNA) 706 residues [BFAB_07:1789510-1792491 - strand] [peptide] name=Bfab07g04850.1
MPPPPRFRHLRHAERLAHAQEEWRQYLELRKSRLKFLSEQIVDDYGFDVFKFGESYFDKE
AKLDRRLILSKGSSHVKQIQDYMDSSNKASSLFEDKGMLRFEGGSGTKDTLGLLGLLAAA
NVGDECIDSYTEDLTASGGTWLYSDEFEGHKADWPPWVTEQDDSSLKLQRFHNMVHALAR
DQHAPSPWKHLNAMFRLNGYLMKILRFVDERNAHLGGRPALPDGSNIADPAIKAALVLHR
AWIRLLHHRSLSLGGKARGIDSLKNILIIGRAQLEQETRSVPVESRKVLESLLEFATTLQ
TLTTFLQALANEFSQESIPKPNTREPYVASNFNIDSERVSAAWAQITHPSKPDPQGKTIN
PFGPMLLWSQLLDRAADFEAKNNRYYVEDHLYDNRVIAEDEHWEVVKLMSREGYDPELVK
RHVPDAAQAREVKALAKKVSQINTHRRNYLLLRDWSKKRPWKQLYFVFDTVTTDTWRGLI
DDFYNTMELLKVLPEVPGQEQDAEYRARVEADPESEANLFGNVFPIHPIPSHDPCKYAGP
YFGNCVYCLEDYAPRELWVQFFCNHMVHYDCGRDYWDNPGNPDFRCPLCRHTQSWELHKV
AGIVPEAVDLWDNVDLVDAAEVGRHPIVQMEGTPADLEGFKELYWESEAAHLSESETWEM
RWRDREVPRELRHEMAQMRNARRKRVLAARHERVAREKEFPTLAED
>7a40f4ee-d36f-4d0c-ae49-ba48bb1eec2a (mRNA) 251 residues [BFAB_07:1792682-1794442 + strand] [peptide] name=Bfab07g04860.1
MATQNACNTIPPVTKIDYKTKGTWETIAGIPVYVSGASNPTNALMVIYDIFGTAPQTLQG
ADLLAAALESLNTVVIVPDLFNGRKAQAEWFKDPSEEAKAAKAAFVESANAIDKWEKLVG
EVVVDCGEKWDGIKAWACLGLCWGGKISAVTSQKETPWTVSGQVHPSRLTKEDAERITVP
HIVLASNGEDVKAVQEYKGVLEAGNGVVETYSTMHHGWMGARANFDNEDNAKEYVRGYQQ
CAAFFSEHLRK
>ee5cd69c-9eb8-4453-ab58-7caa3ca62d3e (mRNA) 376 residues [BFAB_07:1796495-1798620 - strand] [peptide] name=Bfab07g04870.1
MFPKIFLTAATALLSAKSTFAQTYSSCNPLFTAGCPANTALGKSIDVDFTSGSVNSFDGS
GDITYDSNGASFTVAKSGDAPTLSSIFYIMFGKVQITMKAAPGAGIVSTLVLQSDDLDEI
DMEWLGADDTEVQTNYFGKGKVTDYNRGAFNPAANNQGEFITYTIEWTSEQVVWSVGSTV
VRVLTPATADTDQYPQSPMQIKFGAWSGGDSSNAAGTISWARGPTDYSNGPFTMVVQSID
VSDYSTGTQYKYGDQSGDWTSIEAIGGSVNGNVPASASSIQTAGAAAVTSSSPTIPAGIN
NGNSATRTGYPWVAGTQTVSEVTWSTGPSIPSGWEISSEGKIVPVSASPINISRINPLLL
CGPFTFFFFAAIRRWP
>8414336d-3aa5-4860-8aa2-941f61d0825d (mRNA) 426 residues [BFAB_07:1799065-1800812 + strand] [peptide] name=Bfab07g04880.1
MSAEPNNNQAKADVPEEVVGPKPTTVEEPKPTTVEEPKSTTAEQPKSTIEQDPKPSTTES
SPVQIDDSTPIPQITTEEPKPTVAEPSTTESVTAEPTTEQPQEAAVKLESVKEADAEAAA
KLEATKDADVEKAASTSQHSVSFDKATKTHDGSPLSRFYSELPAILEAAGYNEMWGIVLD
PSETHVQTSIVLEKFLRANAKDVPKAKAQLIEALKWRKAMQPQKLLESTEFDKVKFGNLG
YVTSYNTTEGGKEVITWNIYGAVKDVKKTFSDVPEFIKWRAALMELSIKELDLASATEKI
PENGPDPYRMIQVHDYLNVSFLRMDPSIRAASKETIQTFSMAYPELLKEKFFVNVPLVMG
WVFTAMKIFLSADTIKKFHPLSYGSNLGSEIPNVAEQLPKEYGGKGGELKSGLTVKYSEG
EASKTA
>1a3faf9c-eacd-4170-9a91-36e31e13459c (mRNA) 1168 residues [BFAB_07:1801699-1806792 + strand] [peptide] name=Bfab07g04890.1
MDPSIDADIQSPENMIVDPDEYVEPSDNEKDDIAIIDPDEPRPTPADDYEAIRELVLPPL
DQQPPIIETVHHTWEIKNWQGLQKREHGPIFHAGGYPWRILMFPYGNNSDNVSFYLEHGF
EDGPPDDFVCCLQFGLVLWNPNDPTLYTYHTAHHRFTKEEGDWGFTRFVETRKLHAHVWP
GSNPPRPLVESGEANMTAYVKIVEDETGVLWHNFNNYDSKKETGFVGLKNQGATCYLNSL
IQSLYFTNAFRKAVYQIPTQDEDTTTNSAYTLQRLFYQLQSSSAAVSTNELTKSFGWDTK
QIFEQQDVQELSRKLMEVMEKRMKGTEAENVLPKLFCGKVRTYISCINVDYESRRVEDFW
DVQLNVSGNKDIEASFRDYIQVETMDGDNQYFAGENYKLQDAKKGVIFESFPEVLHLQLK
RFEYDIERDSMMKVNDRYEFPDTFDAAPYLSDDADRSESWIYKLHGVLVHSGDLNAGHYY
AFIKPEKDGWFYKYDDDKVTKATMREVLEDNYGGEMPLLNGQVYDASQKPIIRHNSAYML
VYIREARLDEVLLPVTNADTPAHLQRKLEEEAAFKEARRKEREEQHLYLTVRVITQETYA
AHGGHDLTVFDRSHDEDPAAAKSYKLLKKCTIRELIKVIGKDTGTDPRRLRVWFMVNRQN
KTTRPDTPVLDYDQTIEEAHLKLAGSKTQELRLWAETAETVDSNGDAVWPAHPLVKEGSS
PSRSDEIVIFLKWFNVDTQSLVGCGHIYISSQSKVEELAPFILKRMNWPEGTRLKLYEEI
KPDMIEPMKAKQSLKAAELQDGDIVCFQRASEGSSGSDGSDTTTMVSNGLNPRQQPLKSS
DIIDDARLYYDFLRHRRLITFHCHPTRGNKEFNIDNCESFTLVLSAKHTYDQVAAKVGEK
LSVEPTHIRFWTITLNTGNPKTAIRRTSNHTLVNMVSSSYASFAGTSIRSDALFFEVLDI
SLAELDTKKPMKVSWISEGVTKEEPLDILVPKTGTVDDIVSSVIKKAQLEDEEKGGPIRV
YETHSNKIHRELSRGHLIKDLTDYIQIILERIPEEELAQPNGSQYIHAFHFHSDPTKAHS
VPFKFLIFQDEIFSDTKKRLEKRTGIKGKNLEKIKFAIVKRSSYTKPIYLNDDDTLWDML
GDDDDQLGLDHIDKIRNTRTGMGDLFLK
>5a4888ac-6c47-4525-ad27-4bcfd48eac79 (mRNA) 210 residues [BFAB_07:1806989-1808029 + strand] [peptide] name=Bfab07g04900.1
MKPSLIWCGLLACISPLVSATALTYKLSANEKACFYSNVDKQGAKIAFYFAVQAGGSFDV
DYEVVGPNERIIMKEEKERQGDFVFTATEVGEYRFCFNNQMSTFSEKFVDFEIAVENEPR
ASIPSKQGTTPEQTSALEESIFKLSGQLSTITRNQKYFRTRENRNFSTVRSTERRIFNFS
VIESLMMMCMAALQVFIVRFFFQGARKGYV
>d76860ee-158d-47d2-b7b9-fb8ac6d36b1b (mRNA) 575 residues [BFAB_07:1808309-1810402 + strand] [peptide] name=Bfab07g04910.1
MAAALSRALPKPKYTGEEEEIPQHAQQRGPRILGAGALDDTQIVLKKTGPPPYGNRTGWR
PRGQEDFGDGGAFPEIPVAQYPLDMGRKSTSSNNALALQVDGEGKVKYDAIARQGHNDKR
IVHASFKDLIPLRQRADAGDINLDRPSEEEVAASTERTKNALATLVSGAVAAQKPKNVNV
GARKDPTYVRYTPANQMGDNSRKNDRIMKIVERQQDPMEPPKFKHKKIPRGPPSPPAPVM
HSPPRKLTAEDQEAWKIPPPVSNWKNPKGYTVPLDKRLAADGRGLQDVTINDKFAQFAEA
LFTADRHAREEVKQRALMQQRLAEKEKSQKEDHLRMLAQKAREERAGAGAGSRRRDSRSS
RSRSGSYSESESDRSNSDDEEFREREKMRQEKRRDEERKLRQSRMGTERRIQMMAREQNR
DISEKVALGLAKPTQSTETMFDSRLFNRTSGFDSGFNEDQAYDKPLFAAQDAISSIYRPR
QNMDDDDDEAAAEGEMAKIQKSNRFADALGKGTFQGAADVEAREGPVQFEKDAGDVFNVD
DFLSKVGESSNKREYGLQESEGRSNKRARVDEDDN
>6c6a4a15-5082-48f8-9d4d-7d92aa5175fc (mRNA) 368 residues [BFAB_07:1812200-1814286 + strand] [peptide] name=Bfab07g04920.1
MRNTNIPSGSPPKYEVDDPSSLAPRWWDMRAWSKKRWAIFGAGIIILIIIIVVAAVEGSK
KNAYPDYSQLNYTLKDTYSGTDFFDNFDYFNTYDPSAGFVHYVDSEVAAQYNLTYASSSS
AVVRVDTSVTADSNPNASTGRFSVRIESKTQYTDGLFIFDIVHTPIGCATWPALWLSDPN
NWPTNGEIDIMEAVNVVSSTKNQMTLHTTSGCSMDVKRKETGKSIQSSCLNSTNSNAGCG
VYDSAGTFGADFNSNGGGVMAMELRTAGIRMWQFGRDAIPTDISSGSPDPSTWSEATADF
PSTNCNIGNHFRNQSIIVNIDLCGSWAGTESVYDVDCPGTCTDYVANNATAFTDAYWQFN
NFTVYQAS
>55887636-293c-4519-ad8c-96ce0d452a6b (mRNA) 172 residues [BFAB_07:1814506-1815450 + strand] [peptide] name=Bfab07g04930.1
MNGPAFNPPGGGQQGVDPSTAAAVKNMQMIMESCPGKTVVSGVMGFALGGAFGLFMASMQ
YDTPIHTSTAAAEIQSLPMREQLKRGLKDMGNRSYSSAKNFGKVGAIFAGTECCVEGFRA
KNDLKNGVIAGCITGGVLAAPAGPQAAAVGCAGFAAFSLAIDSYMRRPSDGD
>3884645a-e9f0-4f7b-b659-41b86a46fdf8 (mRNA) 537 residues [BFAB_07:1815762-1818607 - strand] [peptide] name=Bfab07g04940.1
MAQTTNSTSSSGSETHWFENVVVLDLDLEGQEVQKQPVVDAQSTPARITRSQSLTRLGIQ
QEFTHPNSHSKTTEADIVEFDGADDAYQPLNWPFRKKLVTTFVYGLFTMTSTWASSVYSP
AIDQVAAEFNVAPEVSLLGVSFLLLGFGFGPLLWAPLSEIYGRKAAVLTPVFISACFSFG
SATAEDIQTLLLTRFFAGIFGAAPVTNTGGVLSDIWAPQSRGTAIVGYAFAVVGGPTMGP
IVGGAITSSYLGWRWTEYITGIMQMAVLIIGAIVLNETYPDALLVAKARRLRHDTGNWAL
HARHEERNFSCREMVNKFLMRPFRLLGTPICFLMVLYASFVYGILYLCLAAIPVQFALAR
SYGPVTSELPFLALLLGTIFGGTANILNNKFYTRRFEANDNQPVPEARLPPMMIGSIFFA
AGLFIFGWTSSPNIHWVAPCIGLVFMGFGFFTIFQSALNYLIDTFSSCAASAVAAQTFVR
AIFAALFPLFVTPMFQNLGIEWGSSVLGFVAAALIPIPFLFYLYGKGIRMKGKFTTK
>71286c09-03d1-45be-8bcf-04f0e12ffb61 (mRNA) 496 residues [BFAB_07:1818942-1821240 - strand] [peptide] name=Bfab07g04950.1
MFVRPRPPFSQIIQGRGKSQVFVNLLFKPPFDRRLFALKLHTVVRFQSTHTKHLLNMATS
NTIHLTPDDTGVFKFGSQDSETAKKTSELLQENHDKHHIFFNNTGFHNHIAHHLLTLYGL
GAPASVIERQYKLNASYQRPVVLSTNQAPVDMSIPDNFHNHLGKQKYYHDFLVFWQREIE
TKGWKDVLKERVFAGDAKADDMLGRMFAGFLHPLIHLGFGIEFNQPAIIAEALAQASVHD
QWITQYLLDVEKNAQPGNKTIPQLLDEIRDDKKLSTAAEWDDGNKIRDGILARARDEMIN
YASQWTVGKGELEAKTAQMINSAIYFTAAAQRPPKQVKFDFYFMHCVNSSIFFTSFKNQD
FLSEAHKGRLLEWKGRLDLIMYASRRSPELLLEEISGYVPKLLEAGDAEWRGLFQRLFEF
EDDGHAVKLGRAVAHAEVVSQGYEDQDWAKIKGFMWLKVGNMVADSVEDTGDTWARSVGF
DEAWKDYVDRPRQVHL
>8c238a3f-a709-481a-ab6e-e664b977f892 (mRNA) 625 residues [BFAB_07:1821788-1825167 + strand] [peptide] name=Bfab07g04960.1
MSSIQQKVATWSSVALRIVTYVFLRIIPGHPWPPLIYTLFALYAPSFIYSHVTQTPYTVI
EDDVNITVLETEQEDQPLGSAAHSQNISGSDKPKHVEEEVEVNETVVIEQKSRRPFHTLL
TGAPDPVSTLLSLLTFLINVALVLATIDLVYHAKVLHPSTELSFARMGYIAPTEANLLVR
EPDLSKLPISVTYKPANPAGAYEDQPQLAGTIHALSEDTDFTQALKFPLPNRPERTYQWT
TSNNHTGFFTTPPKPGHLPQSGSFTFFTSSCIKPRFPYNPFDHALSIPGFKHMADVIKKI
PGGSQFMLFLGDFIYIDVPKRFGVSVEDYRREYRQVYSSPDWPAVGQNLSWIHVLDDHEI
ANDWDKKTAGIYEAAADPWHHYQTAVNPPRARQAGTYNTLRDGATYFEFTQGPASFFLMD
TRTYRDPSSELPANSTGKSMLGAEQLADLLDFLKKPEPKGVKWKIIASSIPFTKNWRVNS
MDTWAGYLNERQVILEAMWDVGLRGGCGVVIISGDRHEFAATAFPPPLNGRWPVSATVNE
FSTSPLSQFYLPVHTYWQTDEEDIQIKYIPGGNSKLGAITIEDTASDQSTLKFRLYVDGH
EVWSSLLLSPPAVPGGRWTKEAFWR
>db87713e-4735-4c41-b526-84e83dd4efb4 (mRNA) 476 residues [BFAB_07:1825841-1827489 + strand] [peptide] name=Bfab07g04970.1
MGNKNARAKRSFDLPNLTLPSLVAADGSSATNVSAVTSPKTPLGFKSFRQGTLITPNFEA
LDKVAPKSLSATSPEFVPALPPQIAPFLKPLVDTSSGAPPVKEFMDRSEMADRTQMNGAL
YHVHTMGDGLTAMSKLPMKLDHVATPANGNGLNSTYCLEFDQKAGIHPLQDGMNAMSIHS
ANSTPDKTGSSSLVTPTKTNETPLSTTSPIVLPTGPRPGNPHFGRADKKKKDIIITQIGI
IRNSARITERFTENGYPYKHTCADEFKPGVYDVASVVGKMPAKDRGEFWEKNWIEIEVDF
RSEEEIAGTNTQGDGQEKSPKDYDTLLNYIDYLGPDFAAHAKYIFVNILFPSIADANQSK
VNSSVLICQQTREFQHIERLVAKLQCFPNIKRLDVILQTPSNTKKPLSIPQLNLVLPFYD
LGFTNWNIKWKTSFMTKAEPVGGWPVHYLDKERNRLLRERERVKNAVFVRKSQFVT
>27f73357-a068-4d61-8a2c-07b896d17d6a (mRNA) 1737 residues [BFAB_07:1827760-1834315 - strand] [peptide] name=Bfab07g04980.1
MIQMQRSSSLPGPGHASPPMSPTITHVSSRSPTPSPPEKNNLPRLHRHQSRSPQRPITSY
KDLPKDADNRWSSGQDSSCSSSPTPAQEAPGAVDRSSTPKPYNHEPITSIKMPQPLLQDI
SQYINPQISAITSMTTNTSLEELAHLVRLSTYQEKKRAHSRIRLQRSLVSTALSARLARC
GELAHRTLVDNFRADEKKNFASLYNAIHDVRNSCDASRRFALLEPDFDNGRSSISGPEDT
TPALNFMHEIPLRSRECLLNFLTQIRTNSDYLASRIASLTPTELSALTSFHQGLEAVDSV
LPFHTRSKGHAASAHRNFSHTPSAVERLLSFQRHDPLSALIHTCFANSAGPDSLEDLRRT
DVWATACARLITESKSGTDPFICSVLNVWTTMRDWSGRTNMEWYLMKILEDGAFLLEKAE
DQAGTRIHVEPRNAKDSIAADEFYDAAIHGLFEIIDDPSAGGIPEGLIELGNAILRKLDP
KRHGPTRRFLVSKWLFSVFLLNAIIHPESYGMMSEYHITEYGRQKILKEVAMRAQRLVVD
MTWNKSSPAPAIKTHIENILARFRSTKPSKSIAKLLPARSITSLRETAEVHPYLVLAPAD
LLTMVNALFPERRPASSFSAKDSHLSGLRSAASSVSGMSAISVLIPQPPTREALDSASIM
SNSGSSTISDVTTSREPLLNETLSTQQRTSSISISSNRQNQRLSYYEDDGFELREALHEM
SRALGSDTTSGACHPCAERWTVLFMTQDGQGLSTQMIHDDDEDEEEGTSSSDTDEDSIGF
RSDLDKDYHQLRSSILKLVEDYEIPESLDSRLESKTFSNRTSILETPRKKFSNKSKSLAQ
IQSRNPYRARDQSPRTDKSSRGTDTRHTKQRVETETEAPSVLISMLEAAETQCKAQSDFI
NAHLYWKTLRQLNQMSSASLMRDGFASLLTILSRGPRDSIRRSTSAIEEYEAWLVWLKQS
QERHDVTIESMMKRLKALRDKMWYVTDVRNSAAYEGTRNIAIALKCMVSPKKVSHLDKSN
ARSRNISKPSANNFLLKTEAQVMDMMAASEDQGGPNKLSDEQAEKTLRWLSQFGIENFCK
GEERIHRFSLEIETCINKLVGDNLMEGPVLWSSELYNRDKRILDSGKQKGDLSLSHFGSL
NLSGEDVTSTDSTRRGLRSTDFNRPGFHDLRAMSTRNNSQQSFSSGRFSGARLNLPGDLM
DSQDYFGMASPVLTIDSATTFWSPFQTRAHSPTTSVSSRRPDTASSTNETIMLKDDHMTA
ARHRFLADLKQTLTSLLLSDLGTLVFARGSETDSWFSGSIGQDCIERRDRADRRARRKTR
KRVIEKKKSFGDLRGAQKIEQLPMERQESLGEKAEKGSTSSNKSLPDNGASENRSTTGSS
STSDSVSTRPRKGTIRATKELDNLEFPYKMAFHRLLRMFSVHPNPYAKLNALYELEHLII
AYLTPSTTRRPRIRQEPIPISPQSPEISHHNAFGPPDAATTTPRAKTLGEAIDNCKERRS
HTLNQGDNPSPINRNTERYMGSNVPTAASTDMIVDVLQDLFRDPDMRPKTLFRDLQFIAS
FVPAATLDKTERGKAFWDAGLAALGLKQDVCRTLIEIADEIVVHYTQTRKTTAAVLDSSS
INGELMKYSMQDAANMWTITAKEGDPVAERELAIFYLTHPELVERITAPLSKPRETFKAQ
VMEMHQGKEGVVTERDRERSDPATMCVAYHWMELSALGGDELAKKYLRQREELNAIP
>96c139ec-53ff-4c7b-937a-5a88334593cc (mRNA) 124 residues [BFAB_07:1876703-1877979 - strand] [peptide] name=Bfab07g05000.1
MPSQWDHVADKDLLLAIIEANNLKAIEWSTIAHELQRKGHPFNNEGCRQHFQKIRKESRT
SSPSASASTIPVATSAKKRKSKAASIEEGQENDEEEAPSKIQSKRVKKESDNQSAAQLGV
ETEE
>e186523f-b602-4338-bfb0-04dde12c1819 (mRNA) 272 residues [BFAB_07:1878536-1880078 + strand] [peptide] name=Bfab07g05010.1
MKSLVVSGALTMTVQIDWNKVAHDPILSQEITNGHAARMRYSRFKKQMDNATPSPVHARK
IATPRRSRIEKKKSAKREPKIKIQKNGLDSADLPVHSKYESQNAHTRLYMNTSNIETNHS
NSFPILEFAKREPTTPITSQSKMKTEAEFYKSLSNPADSPCLPTLLSTNSSASPNSPKFP
IPGVVSFNSPMSSTTSLNNRMTDALFFGPPLHGQAGYKESFGAAYRDEQRYCFDPWVQSV
GGFDTTSTEDRHGILFKTEENYDDGSYGFLSK
>5f72ac26-f5db-4715-ba5b-15b23ce01d02 (mRNA) 279 residues [BFAB_07:1878536-1880078 + strand] [peptide] name=Bfab07g05010.2
MTNDGAINRLLYAILSQKCLKDIDWNKVAHDPILSQEITNGHAARMRYSRFKKQMDNATP
SPVHARKIATPRRSRIEKKKSAKREPKIKIQKNGLDSADLPVHSKYESQNAHTRLYMNTS
NIETNHSNSFPILEFAKREPTTPITSQSKMKTEAEFYKSLSNPADSPCLPTLLSTNSSAS
PNSPKFPIPGVVSFNSPMSSTTSLNNRMTDALFFGPPLHGQAGYKESFGAAYRDEQRYCF
DPWVQSVGGFDTTSTEDRHGILFKTEENYDDGSYGFLSK
>21c2f7b6-25b0-4cef-b9c7-36200eebf067 (mRNA) 411 residues [BFAB_07:1880193-1881680 - strand] [peptide] name=Bfab07g05020.1
MPALRGRRQKFSSQEDMYLSNFREWRNEEVSESWAQFLARYEKKFWIDPHSSASLFRRAE
KLSGHRHQTLSRVEEMMHHMLKIRKSSLLWTWGRIGQAFGTNAGTASVAYKSFLERNGIG
EDENESHRIMWTESDRRRLSRARHLGYSWERISRQFGYEEYICMSAHYIHSYGEGRSGSL
NSSFHPKYFFSFIGRSRGHHIQKSTDALEVKDEGRDCQWVKGLVTKNEREQSPSGSGTKN
VKASGSGSSQSCFTNSKYMKSHSILRLEHNSGMIGRIPTKHSLGGSRVTTAPRSQAGSRP
CTPLRITAPISRERIAKTRFNGCAASPSFLQRLDSRLSEAHHRNELGVNGLVKIDTQMAS
HCFPTSLKNRRSYKPTCNHEELDEAYVRVKEEVEDDERNENMTYCMTSEGR
>6caa4af5-d03c-48c5-814f-d66ed69a47a2 (mRNA) 480 residues [BFAB_07:1884167-1885803 + strand] [peptide] name=Bfab07g05040.1
MSSRYAAARPKRAGEEFARSYRNENEDGPSKKPKFDLRNPSALVADEPEEDAVLDADVIG
SRGTGTKRGAVNIDGYDSDSDNEGFDARADERAKGKKGEVNLAEALDGYSKEKSGATNGK
TDIEEDADMFADLEDEFADGDEDEGELKARKKGKEVRFLKEDEIEGQVLGSKSGGHVSGN
FALDPKGKLSTHAMDDQESSDDEEDAVLAAQEEDVDEEVGAGGLKRNAPKVDAFNMKAEQ
EEGKFDANGNFVRNAADRDAVHDTWLEGISKKDMKKAAEAHEKREEERRQKRLEDDAMLI
SDILRTLILRLDKAETVLEALARLGKSQVKTKKIPKWKLKKQNQKDDSMDVDAEKIEDPE
QTRIREAINAITGAADQLLIRGQTDVYEQEREMLIRQYRRETGEDWEEPSEEAAVNEENG
PAPTKLWEYRWTDGRDGAAKQGPFDGPTMVAWQDAGYFGEGVEFKRVGQEGNWSRVADFV
>4f7e1d1e-db06-4c56-8f77-e4fb51fcd749 (mRNA) 470 residues [BFAB_07:1885866-1887921 - strand] [peptide] name=Bfab07g05050.1
MAASIQTISESKELRGLNLIAAHSHIRGLGVDPDSLEPRASSQGLVGQEKARKAAAVILQ
MVKEGKIAGRAVLIAGPPSTGKTAIAMGMAQSLGSDVPFTMLASSEIFSLEMSKTEALTQ
AFRKSIGVRIKEESEMIEGEVVEIQTDRSVTGGTKQGKLTIKTTDMETIYDMGSKMIDSM
TKERVMAGDIISIDKSSGKITKLGRSYAKSRDYDAMGVDTKFLQCPDGELQKRKEVVHTV
SLHEIDVINSRTQGFLALFSGDTGEIRSEVRDQINTKVAEWKEEGKAEIVPGVLFIDEVH
MLDIECFSYINRALEDELAPIVIMASNRGNSRIRGTNYKSPHGLPLDFLDRVVIVSTHPY
AKEEIQQILSIRAQEEEVDVSPDALALLTKIGQETGIRYASNLITTSQLICAKRKAKQIG
IEDVQRSFTLFFDSARSVKFVTDFEKRLIGEEGGVNLSVTNGHGDAMELS
>22a1b5ef-4df1-4598-b599-ca47498dd4e6 (mRNA) 905 residues [BFAB_07:1888291-1892382 + strand] [peptide] name=Bfab07g05060.1
MSSRKHSEDRPPLRGPASSHRGDMHRPDKNYGTRDRQVSEDGHEKRRSDGDHEKKDSGTR
RNVERADRGSRSSEKTSSTNIQLSKSDRSSPTTTRQAAVTTDMESVSKETSVNPLINLSK
QVPVTESYQLESLIDALMQFADQGDSRSLLNQVRNSAEESLKRQVEEIQKMGPIMQSFPT
HMDVQNKRKVEAEEVLKKTNEELEKAKRLQKEAAKTIASRLVIKASPPIADDSKYLQERC
RKLEEKVKDLEKTMTAMDQKHKFSDINDRFQESQAEHRKVVTEIKRSEAHFAEKIEASES
KIKREHQNLSDQFTNLDQRHQATRSEVSSIGPRLDRHENSLKKHDASINVTEEEIATIQQ
EASKQSTILKAKSDDIDLLTRKVTSLENSSKTHKVSLDDFKSSSLEKISQLTDETTRFFE
LQTAQRAVPEEFGAYEQELNAMKDAHKTILKSLGTSVEELNSLKDKVGRLEQIPQAPSIA
ISQPPSKITTGSSATMIGVMQTRIRNAQEDIRVLDERIDKIESSLGSPSRATPQEDAKVN
EKLKSTLENYESRLSELEDSLKKVDSVSMNKPVTKISPFSAAGQDVTDVKKAFEFYKEQR
EKMDQILSRRVEEHDNQVKSMQRNDITTNEQIVQIQIRMGVLVEDLNRIAHRVTDTANDQ
NANTIALRHLHSRFNNISTDDLAKNMLRQLEVIYPDVGNAEGTFLELRKLHSNHITQLER
LKSQVVALQSHPVSKQSPANAGNGATESSRQEVDSLTKVQIKLGTTAKKLDEATTSTQAR
LNTLEQSHTALDLKIQNVNEKIETQQKSLTEMSADLIEAVGDLQAGLEYLQNSIGTELEG
DTPAPAQSTLLRAHQYSAQEAVANGKKRKNPTSEELSKPESLNNGRERGPLGKRTKRAED
GEDLE
>95610d7d-75d6-4dd4-a857-3210de3f311d (mRNA) 310 residues [BFAB_07:1912919-1914211 - strand] [peptide] name=Bfab07g05070.1
MASVYKSLSKTTGHKEDGPANGVKKNKQRVLILSSRGITYRHRHLLNDLASLLPHGKKDA
KLDTKSKLYQLNELAELYNCNNVFFFEARKGKDLYLWMSKAPNGPTVKMHMQNLHTMEEL
HFTGNCLKGSRPILSFDASFDKEPHLRVLKELFLHIFGVPKGARKSKPFIDHVMGFTLAD
GKIWIRNYQISETEPSKVKGAEEETSTKSKSKSSGASETECNLVEIGPRFVLTPIVIQEG
SFGGPIIYENKEFVSPNQVRSEIRKKKAGRYNARAEQGVERLAKKGELGLRTSGGRQAPK
DALDNAELFA
>e17e5dfb-aeb7-4779-b17d-4352a62d7cae (mRNA) 211 residues [BFAB_07:1914609-1915601 + strand] [peptide] name=Bfab07g05080.1
MATFKSIHNCLLKVPAPLLPPASPHDPTLTSEIASLQLHPTLETALHLLNLDLPSAHFLA
RHMQSAPAYEGMYLHGILHRIEGDYDNSRAWYSDVKESEIYSNLWGKGGQTWKAWKEEHG
NDGNRESLDNGQKFLDAVQKFKEMNGKGSEKEKASLERQSKEEIDGVIECCVNKFGTSRM
IDASSAWVKPSDEIKKMGEDQVSGDSGRRKF
>49c2ffe7-92bc-4596-b725-86a591b7bc2c (mRNA) 213 residues [BFAB_07:1915512-1916922 - strand] [peptide] name=Bfab07g05090.1
MANDEYDFLFKVVLIGDSGVGKSNLLSRFTRNEFNLDSKSTIGVEFATRSIQVDAKTIKA
QIWDTAGQERYRAITSAYYRGAVGALLVYDISKHQTYENVTRWLKELRDHADSNIVIMLV
GNKSDLRHLRAVPTEEAKQFASENNLSFIETSALDASNVELAFQNILTEIYRIVSQKALD
NGDSAQATIASGTNITLTPPPSDEAAKGGGKCC
>8e6b12b9-bb11-4ee6-8adb-dc44c234f513 (mRNA) 1220 residues [BFAB_07:1917902-1922454 + strand] [peptide] name=Bfab07g05100.1
MTSNQPSKEGRFSSLEEEELSKISIETTDDEQYGSDHELIVERILAQKTEGGQRLFLIRW
SGFPEEDSSWEPRKNILGQSILDAWKTRRTRELQGLDAPYDVGRLESLKKIADAEKAQRV
RLRREKRKRLGIVVSPHESDADSVDESQSSVPGPLVNSAALRDARGSERQQQVQATRKSK
IQERQQIDSDSSSDEPLFVTSQRKSTLSVSSSSNPQAQKESQNDVVSHVTASDDRQKATA
ESSSLSRGNPKIRGGGGATRGGSSSLSQNVFLSGKAPRKQKASLIEAAADPSKDQRHFKN
RHILRKAELAGRTLPDQQLDRSALHLINPSRGSSSSVQRPETLYRTSSAPQTGEPMELVE
SPLEKQNISQRLPALHPSEMAWEEVQHIPYEKRTICFFFTQASGCLDSSCKYLHKNDPLL
PVAPPPDGWFGSQKICFFYNLNGDCKNGDMCSSLHESNPNIPVRKPPSGWTAPDPSTKIM
PTKVRLPASVDGPQWVCYYWYHDNSCTKGVDCKMAHSADNDLRVAAKPGSVTCRYWIQGH
CRNGIDCSFAHESPHNGRSISYTSQPYSNVVDSEPLVEKSVQPPLDQSKVIPIFGDDDAI
DFEMDTLSDLSPLESNIEGPERCLNDHLVTETVNITSTKIKTVKFGPQTQSIKLDFTSLP
LNTSDWARAFVSAEILDFNQICTIYDFKLRYSHIQHSTYWQASISTDPTDQDVCDTVKNI
AKHLCLQMSGLACISDSYIILLYPAVAEEWKYLDATPDLSTGATLKYSVFGSQSPISSSM
ESATIDKISMMALSSSDMMMKSFHHLDYEKLTIDLKLKDQKLKKPITFNFCLIFPVSKQP
LAGLIASWLKSCSKDDGKVYNYQKPGCWNHFKKHVNAGAVLIHSSALSLISDTDLTHGMT
LDGMNYTFWCIQDSTSKVPFSQMQKQSELGQVFIKRLLPLGYTILLTPSFLVAEPVMTLS
FLQWYQKKLKNSIRGSIRVLCCHELPSFLLELAISKAEEQQELMKRLAGDPSMLSKLSER
GLSHEQCTARLDLYWLLCDMLSKDLPANLSPFDRDPSEENSRSPFLFAPPSIDQNDEKKL
VAWFAGWAYANLDKYRRFYVFGSGKSNRSSGVPVRMIPECESFPQNSKAFQEGGALAWAR
RGRNPVSIGCTTAPSGTNETRVEKAEVKLKEFKYDFTDEWYPEWRGKPGEGRSSNHIIEY
RWNRVFELLKIPFEAGKVEY
>22f62ff4-1fc9-4350-90da-494cb0919e01 (mRNA) 718 residues [BFAB_07:1924222-1927063 - strand] [peptide] name=Bfab07g05110.1
MGVGRRMKKQGMPEPLDEAHFTNLKRKAGMSVAESRAESMQYAPDPNKKRRTSEKKSNGA
VNGKKNSAAQNATKGKFTNSLPVQKPSAKKSKKAAPLPMSDEEMEDVDSDAADLMNDEFD
ELDVSDDDGPGLPDDFLGSDSGSDVYDSDDDHPKAMFSEDEDESDAEEKLTAANIAGLSR
KLDEQKAEEAAEAQAELEEAAMQTNIAGDRPHIFDSDDEDGEAPKTNALLAPDLQLLRSR
INDTIRVLDDFSNLSEEGRSRAEYTAQLIKDICAYYGYSEFLAEKLFNLFPPKEAYAFFE
ANETPRPVVIRTNTLRTHRRDLAQALINRGVVLEPVGKWSKVGLQIFESAVPLGATPEYL
AGHYILQAASSFLPVMALAPQENERVLDMASAPGGKTTHIAALMKNTGCIFANDSNKSRA
KGLIGNIHRLGAKNVIVCNYDAREFPRVIGGFDRVLLDAPCSGTGVIAKDASVKTNKTER
DFLMLPHLQKQLLLSAIDSVDHASKTGGYIVYSTCSVTVEENEQVVQYVLNKRPNVKLVE
TGLAFGKEGFTSYMGKSFDKNMKMTRRYYPHAYNVDGFFVSKFKKTGPSPKSKPGEKDAE
KELDELDIDKTPIRETEEEDAFGGWDDGEDEEYMVKARKNTLKRKGIDPKADKTKADTKV
EETKDEKSVKANKPKKEIKEKAKKEEVKKEEVKKDETLKTDTTKKESKEKKKKGSKSK
>219688e5-a56d-4a9d-b92d-ba8a07780051 (mRNA) 206 residues [BFAB_07:1927194-1928113 + strand] [peptide] name=Bfab07g05120.1
MTELTFAKSFIQTLESRSPKITADHVEDPRNYPSRGAAILPKMRKPPAKRQKLSPGQERS
ISVSLKSSRNPPLDVTLSALSPNTSILNLKESLSEKEGIPVDKLRVLYNKKPVGDAKVLK
DVIGEEETKVEFSIMVMGGAASVRKVETPGKEVEAPVAQGPSGLETLAGEEFWGDLKGFL
VQRLRDEEQGNKLHQIFKKAWESSAE
>7f0d7e1f-c1b7-4dd5-aab4-3a9d0b4a05d0 (mRNA) 582 residues [BFAB_07:1930232-1932497 - strand] [peptide] name=Bfab07g05140.1
MQRALSSRARASILNGSTASKLRPLQQLRFAHKELKFGVEGRAALLAGVETLAKAVATTL
GPKGRNVLIESAYGSPKITKDGVTVARAISLKDKFENLGARLIQDVASKTNETAGDGTTT
ATVLAKSIFSETVKNVAAGCNPMDLRRGTQAAVEAVVEFLQKNKRDITTSEEIAQVATIS
ANGDTHIGKLIANAMEKVGKEGVITVKEGKTMEDELDITEGMRFDRGYVSPYFITDTKSQ
KVEFEKPLILLSEKKISNVQDIIPALEASTQLRRPLVIIAEDIDGEALAVCILNKLRGQL
QVAAVKAPGFGDNRKSILGDLGILTNATVFTDELDLKLEKATADMLGTTGSITITKEDTI
ILNGEGSKDAIAQRCEQIRGVMNDPTTSDYEKEKLQERLAKLSGGVAVIKVGGASEVEVG
EKKDRFVDALNATRAAVEEGILPGGGTALLKAAGQALGGLKPANFDQQLGINIIKSAITK
PARTIVENAGTEGSVVVGKLMDEFGSDFNKGFNSATGEYVDMIAAGIVDPFKVVRTGLVD
ASGVASLLGTTEVAIVEAPEEKGPPAGGMGGMGGMGGMGGMM
>ea4cbe15-f67a-4c98-9a52-e5fa50c7fb6a (mRNA) 296 residues [BFAB_07:1941292-1942709 - strand] [peptide] name=Bfab07g05170.1
MAPASNEEQFKFLISCIRYSNNGKVDFGQVAKECKIVTKGAAAKRYERMMRSHGIAPNAA
SIKPAPGPSNMPNSNSSAPTSAPRSKSSNKKRKFSNEDENADDEEESSSGQGSSRNKVKR
EVKSEMNARNAIKEEMYREDSPSAQLREGMRMGPELGGGLCDANRELLDFYSGESSAAGS
VSGEVGELEFGDVEGYAGVGGADGMGATSASSGAMNAYGQSQSGYGFSAGGYGGMMGERG
MIGSGTGMGGHGGQNMMASRSHAAGPNGMGMGAQQYRSIGQGYESEGGSESPLLVE
>d2c2fcb6-7ffb-4ea0-ad2c-68710b365ab9 (mRNA) 224 residues [BFAB_07:1943390-1944797 - strand] [peptide] name=Bfab07g05180.1
MTTLTLTAKETEMLVAVMSEMGEIPSTINFERVAARVNVKFARNARQSFKNLFEKLKKQA
GPSPDDGYGAVPPTPVKRSSPKKKVGPKNGPIKANPKPRGKKTAVKKAVKEEEFDSGDEL
AEPVLDDEDGKLPEHVPSLNAEILGKNAVVTPSTGCSESLQILDDVARMSVIGAKEPSPT
LIGKCHVDNQLDLDEEILAAQSNMSVDAYRHWKALNDYTFLENS
>ff7f0ed8-5aac-4a4a-b7a9-6d4fc03e4e50 (mRNA) 188 residues [BFAB_07:1945173-1946325 - strand] [peptide] name=Bfab07g05190.1
MSISLCVVFAIPPAVLSRSILKRSLNSCSTRIHAQFPTRSLPLRRSTIFLLVPHRALLMK
WPVARLARVTSLQRRHPMPMAPMSLLFLPHPPRTASPKPRLLPDLVPRRHQQRNPPRRPR
NPTRNSLMLKMMRWRMSRKKLMKMMMSKQYLVINPSGLSSVASLSEVTYVLAKLVVGAGR
WFCSALDL
>8ef5c1d8-847b-4f64-b866-0275c0041e6d (mRNA) 319 residues [BFAB_07:1947581-1949194 - strand] [peptide] name=Bfab07g05200.1
MSRKRKEPEKIEEEEEVEEVENTEDEDSDKSEENEEDESDERSEESEEDEEDEEEEEEEG
EEGEEGEEESQDDEDGESVEADDEAEDGKKEKGKKRAVKIPPMTDEQIKIANNFDPRGPT
AKDAKFFFIIFDCIDTPPDIDWELVAERAGCSNACMARSRFGQIRSKLRKYYELEAQPLV
PKITGMRPPEIYTYPPIPDAEKEILTDPAYDRLVRRKAVRVGNLQNIDPKKPSKFKQNRG
QGYILTKNNDTAANLIITANERHDYDSENEFQNKEEFDLNSYQGFDKETNTLTVSDQGSD
NEIKEAAPVVLDGLSHNFQ
>916765eb-e102-43d5-aa32-ae213fb87cbe (mRNA) 335 residues [BFAB_07:1950956-1952437 + strand] [peptide] name=Bfab07g05210.1
MSSCVYEHASSGIVTVIVGPEGRPFFFHESLLCQKSPWFRLQLENQMTEDYDYDSANELS
PIESSFQHLQNFQQIQRKVIYRYEDDIHTFNQFFSWMYGPMYPLPRRDPENYSTSTHISE
WIMLHQLAVEMGVMDLAHQAFSEYVLCRDTLRTGYWMPLPAEIQFIYQNRATTYDLRSLI
VLKIRSLYFSSGFVRLQRELSDICGCHPEFHTDVYVELQRHSEQITQCDHADCAIHSPQT
ATADTLYIPTTSHFQNPESPLEVEPPSTSSSEYLHNISDLDLNSSPPYLSDCDTTSTGEK
DANSEQARSEAMAEYHESRNTLMSFDGGSGRSILN
>f757bd82-9880-415c-aa6b-d7a24fca911e (mRNA) 264 residues [BFAB_07:1952662-1953734 - strand] [peptide] name=Bfab07g05220.1
MRKAALREKKSPLPMMPPDTQSKAESEAETCHISEKVEKISNNKTPMNLYLIVRSHVFEI
PKDIAINASKLIAKTWSANPTARRITFTVEDKDGDDNDPDPEHFYTVDVVAHLVGCMYGN
ELGCPTSDVDRHSGCLLAWCKVYKFARYLEMEEACESVLARIAKCLSERKFHRGIPTGEE
VVEIFGMTGEGSDVREVLVDAMAKMGQLWNVVGEGHTGDTRDCVENWLRSESVLREFQEA
VRMRIWEGVEERMERIREDKGDRG
>83051b7f-aa22-4dfa-9042-34fcab5c7ea1 (mRNA) 289 residues [BFAB_07:1954141-1955812 - strand] [peptide] name=Bfab07g05230.1
MRLYRSNVGIGDSRQNFNVHKSILQQCTTYFESNKLFDTMAGKQGLIFLNDENPKVFKLL
VDWAYNGTIQKPRTKIYIKTKPSQAEINRLETELLTEFNESLRILVSLYSLAERWEIHNL
MNRTIDAIQDGYLEFGTVFGPGLAVQIRQETKLDSILREFCIASTVMHMDRGCTKLRQEV
MTNCITFPGYFQGMLKWVSRNFHLMGRRSKEVTNPWNSNESFSMLHRSKLCPCHFHVHPT
GQAHKGHKSCAVSFIDCSYPGDHEKMEGLDVFSLFMGSAMMGFNLSDPE
>c07690c8-060b-48db-97b7-9d47ef8163ad (mRNA) 269 residues [BFAB_07:1956678-1957795 + strand] [peptide] name=Bfab07g05235.1
MLTTIKKTRAPPSLFRILSQTPTNLSAKVKRFHSLEHNQLHSLGNEEFHPRARSFDPRQL
FSDGTLVTPKDIVEYHKSSGISYLAYLEADSFYYEFGFYSPRTVVVAVDGACPGNGTIQA
QKSSFGVFFGPDSPLNTYDTITRPSGEKHTNNYAELMAMRHALELLRHHSELRQWIFKHP
LLIDCTFKIGVVIITDSKFVHDCLTLWLPSWLKNGFRTIEGNPVANKDLILRIHHMMELL
SGDLDIQIWHVRREHNRDADELAIRALRT
>9e43f0c8-fbbf-48e8-a844-a074f16fbbd3 (mRNA) 359 residues [BFAB_07:1959277-1961001 - strand] [peptide] name=Bfab07g05240.1
MDPLSAQPYRLPTSRISIKVLAEGAANVIYQITLDPGSQDLAEVNKGHQELEFLSGKLLR
LRKDVPTTAPTSDSHQQWLGYILPLFNPEQLVTQELVYIGHLNVIPGLNTDLRRFDNPGG
TSTSNHLAPPKGKFYRSRAQSGTFLAKDDYGLLVTDMTPRKSAHETVVEFKPKWLSPSHE
MPSKAIRCRTCALHARRIAFGEERKNTDLQSYLCPLKLTDDDPKLKFANCEASASHILHK
PRESPAVQSLAKWIHENPLLKRLRDLQTEYDGKASLKPENASHELCVAMTLRDCSLYIRM
DRNYQVVEARLGDLDYKSARKYSSWRKKEQELVEEGWYCGDEKKEWKQPVDECLLSRKI
>66b6c401-ef23-4b5b-8e8a-2adc6bfcc546 (mRNA) 563 residues [BFAB_07:1963095-1966057 + strand] [peptide] name=Bfab07g05250.1
MAFNFNWSPLTADAEFYQRAQEMLTAALNKSPKPPIIKDDILVNELNLGSVPPDLEILEI
GDLAEDRFRGIFKMCYSGDAFLTLKTRVQANPLNNHLFSKPSFTSPQPLAADAGLTIPLQ
ITLSDIKLSAFIIVVFSKSKGLTLVFRNDPLESLKVSSTFDSIPFIKDYLQKEIEQQLRT
LMMDELPAIIHRLSLRLWCPEYRAKEDQEMAEAAKKTKDEVAVDPFASPPQDAVDARGNV
LDATEISNLSLDGGSEIHSLFSQKNLLRLAALTNSHRTLSLFTPSIRDAVFRAWAPSERG
DSAGTTTPATPSLQRPQSSLGSQSTTYTFSNRSSDDGHGGIPSRPSLVNMNSATTGLSLG
ANRGSRSHPTRKKKNRVVNLRKPKATESSESGESETASTTAVSEPTVPSRIPEEPEDLPV
TPPSGKVRFNSIDLGDSPKKLPPSRSMTPEQVKMDQIPSLTVQPSTPINTQEQKRPAYNQ
SASTSYTPEKSAITPPHTPFSYPHGLHFSTTESPSGILEQAWIMKMASELARRQHDDKTA
RQGFWSTSSNGDDAPPAYEPKAL
>b88e5e1a-4d0a-46db-95a9-f30a7a4dc9c7 (mRNA) 255 residues [BFAB_07:1967523-1969357 - strand] [peptide] name=Bfab07g05260.1
MAPPNTQKRTKGVSIYRPFVYGTTSHKFSPKYPKPEGTPEEHTHQWTVFVKGVDDVDITY
WCRKVQFKLHDTYPQHLRSVENVKPGDPFQVTETGWGGFDIQIKIYYDPIANEKAQSFWH
RLVLEPYGDDQLQFTQNRDNEVRSWVYDEMVFNEPYEQFYEVLTNPVPREKNNGGKGKAT
RTMRGGMVGSVGERTVFIPMTQRPGQPFSKDGERAEVKKLAEGKKTVDRQNEELRNELRE
KEEEVKRLKAELETL
>f1a4e376-ad6e-4008-9d2e-39c25aa45416 (mRNA) 289 residues [BFAB_07:1969411-1970598 + strand] [peptide] name=Bfab07g05270.1
MSVTKRIVVCGGNGFLGSRICKSAVARGWDVTSVSRSGEPTWSSVSSSPTPPAWSHKVTW
ERADILKPSTYAPLLKSADYVVHSMGILLEADYKGVISGRESPISGLSRAFSSSKAGSQN
PLTRQPGEDLHSQERDGQITYELMNRDSAITLASESYKENVPAFAYISAAGGAPVLPQRY
IDTKRAAESTIASEFPKMRSVFVRPGMLYDSSRKITMPLAAATGLGAAFNGLTGGMFGGI
MGAAGVKPLKADVVAEAVVEALSEDSVKGPVEVKEIEELAEKAWRKGML
>2e047872-9672-4e35-a1d6-86ef660c7d6d (mRNA) 305 residues [BFAB_07:1970554-1971786 - strand] [peptide] name=Bfab07g05280.1
MPPAKKRKTRATAESSEEVQPLDTVTNAEEPTDTPSEATPKKTSEPTPSTASSATSDAAA
KAKERQERFRALQARAKSSAQTNLKEATLESQRLATDPNLLTSLNRKSAVASHNLLKADA
EAAGEDFERKRAWDWTIDESERWDKRLKKKEAHRDDQAFQDYRQDSRKVYKRQIRDLKPD
MEFYEKEKMAAVEKAAASGGLEIVETDDGELVAVDKDGTFYSTADSTGFVEHKPEKAAVD
RLVKDLQQAEEARLKKQRARNAANGEDGDVTYINDKNKQFNQKLSRFYNKYTAEVRDSFE
RGTAI
>d4bd868e-c23b-44f2-bb17-b8b7a5465d9b (mRNA) 241 residues [BFAB_07:1971974-1972979 + strand] [peptide] name=Bfab07g05290.1
MNCQKAILSIYRRTIKSSNFPAISKSTRRFKGYKSEEPLVLPRVVIDLDAPENPAVRNYD
EIKDNVLTPFQQQVVRSTEKAKTRRAKLVRKQLELGVEGFPRRGGRKNQRIRDQSLEHEL
AYNPDASPPNVTAMDLMTYALMGNPFVAKASKKPPHVRDVHMEGLFTAHSIDFKDTANMT
IRALTEDFDISTDGQGGENVDTEGNREIVRKRKERSKMREIEEGELVEHEVEIQSRELNW
G
>4603cd20-9926-43e0-abd7-d7eace6d5f3e (mRNA) 444 residues [BFAB_07:1974431-1976773 - strand] [peptide] name=Bfab07g05300.1
MSSPTSHRHRKAPREPSTSLWSEWKWDSKREQWQSYRTNSGGAIEWKYDDQLHSSSSAAA
HIPRLDGASPLNTVSEDTNQYSNEQNYTTSNNNIGLVTDSLAATSLDPRANRDPPIVANL
QRNNTSTQHRNFDPHYRLHSAREFKFGKVFKVLWSEPSGSTAGGGGGTVLSRREVHGEEI
FAKVRRFVIISPKQGHCLCLPIMSYEGRATSKSGVHPEEHAIIYTTPEPRLVENEDGSKM
IFDPVKMIPESRRHVLDEASRINYAKIYTVEYNVKVWFIGHVDPSCEQIVRRSYDDANQP
LLLSSQPSDPTAYSTKNFTYGNSTYATPGSPANTAGYSSTPSYPSILGYGNQMPISTPGY
GAGYGAGYGAAPASSNMYGSSQYFTPDHAPPLYSQPQYSPQHPPQHPSSLYSTSQHQQYT
NSTSQGYNYGPQGTYDPGSGAGQQ
>fc692aa3-997e-4298-b0ed-45d96a1d3d8a (mRNA) 687 residues [BFAB_07:1977126-1979975 + strand] [peptide] name=Bfab07g05310.1
MRVAANRSNRDAKRSCGIRQERINIQNTLQVKEIARNPQRLQKLDKVPSVAVASCTSCTY
NSMPYKSKGRRKRQKPFITTKATTKQDCRHTVHDEELMRCREAKVTAIVGQEKGRGSVSN
SSSTPRVLTYNEPRENHRSIKKEDSAPRNHHLNGIYSENILHMASELRRDSPLPDILHEV
NSTDSSAPTRQSREIVKHSGQAIDDNVCNRPPSAPTLPSSRSRVQLHENCGQQSDSNHVH
CKVLSTKLEPSTIYRQTSKKAAACDNSSLSGSNKIVNRQADMNYSVTTVDSPNAQRLLKS
SPPRHVQNASSIFEASILYGQWQNISRMRSHIASLRFSLQHKRHSLRMLQNEKSLADETY
FKQFKMRELHMPFPRKWWSEKTTSELLCDCQKARDRYGSLEDEYNYLERDLDSQEYELSR
LEEHFYSQMRDPSLYLPSSTELVRYSEWTEGPEHFEPQKPQELHPLVDAYFSKLGELDNF
RELYDDILDEKLSLEEKVDLRNRFDMEPLTTENQEWLDSSQAQLDDLISKITISEEEERD
LHQKCFSLGLIDEAGEPVESSKLDQCSPSLDLTLKPLEISDQYSQSSPLHLSEPNDLEKA
IKVLDSENNHLARNERFNRWSLEKLQVSLHEVNIYTNCFEKYDESQDLCKLKEEICEEDF
RNSWFADGFTDRDARSTVLTTTNSTSQ
>4e5a3c95-7e1a-4bad-a019-1cc892885917 (mRNA) 407 residues [BFAB_07:1981153-1983284 - strand] [peptide] name=Bfab07g05320.1
MAYHTSQGIELDQSTPWSGWIWVPEQSYWYSYRVNAEGKEEYEYRYPERTENRAATPRTS
DLTDVYTSSQTGDSSSFDNNATPRLPHVTSTSNHNLYDSSNSTAQNYAINNSNVAWQPEN
PSSSNAAYQSNTDATSSSIDATARAFETMLLETPRSVPTEAFDPEVNQAIINAKHISKAP
NTGNAETLDSRYTVYGGLHRQDDFWKVGRVFMMLWTEPAQPKVPAAGGTRNGSHFSTTFL
GEQAYSEIRRFVVVIKGYGNSVCCPIQTYSGQATLKPNLPAPGRHTIIHTTPRAPEEHSY
VASNGQSVYENLVLDPIQVDSERSHEPEGLLHPLSRLNYSKVYTVEHYVRVLNIGMVAIT
SIGTFLSQSGWPQNVQPVGSQRPHSNRPSRKISGQSSNNRRNRREHN
>7e58c39e-fdf2-436b-90dc-6fd67dea184c (mRNA) 591 residues [BFAB_07:1983586-1985996 + strand] [peptide] name=Bfab07g05330.1
MAQQSSDTTKNSRNEIQNTYSMLRKFFIVSGNKGSAMKSLWASIFGRPKNTERSNNESHQ
NKRAGILPPERIVEEVSEISKNRKESNWDQGDELDERSDDGESESRTKKYRSRLNNLLQG
IDKWQEVLSAELQARQKMREVGFKRSAVSRADASFMKEVQRLQAEGQLGAFEQLSKLADA
CQSARDGLGPLEYEGFEAQKKLQGHVWELQQVEDVLFESFASELGEGYEESSVTSDSSSA
HDILGIPDNPPAIANNHGIRNPQDEDTGEQFHPPTSIITETERQQSYSNTTLPINDLSKI
KMDIHDLRMLISHDESQPLPAVHFRHSVESVSRKNILSDRPLPLDKSGMEKQQNPLLLGL
GSQEELLHQEPHYDPTLVLDPEVIEHVNGEGQQVETTSGSDSGLFDLDMLEENDMSTLTT
KQHSSTESFPELLTQFGTKRDRINKWLLHKILISRSEASLIGLQLQKEPDTSPSTWAELI
VAYFQFDYDSSKPTNSQEMKNMITERRTSELQQSPNYQEDTTITSHPTLLSKTTIEDTVA
APIAHPHPVEKNETLNSLTQQSICERLAQSESSNPRSTKVDIPTLIPKCQL
>165729ff-cd25-4042-882c-3a051189c828 (mRNA) 944 residues [BFAB_07:1989380-1993286 + strand] [peptide] name=Bfab07g05340.1
MLNDHEEGTSRFPELLRGDFDEIQLREIPPTPIESSFDVERIPRTRANSAVSDVSEVSAL
SAADSEHLMKVDSPSRNASRTRARSHSNESRYSIFPVDLPRRKSTASIKTTRASRARAAS
LAASEWSTTLDVPVRSETRASRAERVSSASRASSSSSDSRSRSRSSSPSRSPSRSRGDSN
ADSVNTISLEVPPRSGTISSRPRGISNSESMISTRSSISQDWGDHRSLLTTQHPPPAVPQ
NDLMAQFENFVDAIDEVPTRRITLKRVVAPAKKTVKWMQLKKLLRNPLRKESNLFDEKTN
DSNRAKVPQWKSRCSIAAVLMGVVLAVYVVFIIWASQKSTDNVSIRTIVEGSCSTVNATN
FGLHVLINVLGMAVSIASACALYFLSSPTRNEIDEAHAKGNSFDIGVLSFRNLKSFKKKV
LFGLLIISSLPIHFLANSAVFESSLEVNYDVVVVSPEFLAQSSVDCLQDVAATCTEIDGH
PRSCETHPLNFTTSQESSDLCNTSTVLHESANQNKLQRLNTTECLTAYSTASNPTSNYGN
LLVVTQKQPLFTNNTILLAFHHMSYSSVLSGHGWTCGPDDPLPGQNTCDIPNLILNADIW
TLGPSMLPTTTNSTSLASYERWDIDHCLVETLPVQPMCRLQCSRLIILCIIIALAVKFIC
ILIIATTMTKPVLSTVKDAVTSFHDRTDMVTSNRNFVHRNSAWKSKDGLLILEPEVEGRP
RNLRWFHGASLPLWSTTLFLGAVFLAIPLVLLTTATVPIPHPYSIGLGCYSPLAIINIFS
WSSKSFVPLPEITNPQLFPTVFLANLPQLAIYILLFLFAQVYTRMLSANTFSCLTNPSPS
LKSRKIMGFSCAYLYISAQAVLGTILHFLASQALFIHHVEVVGSDGSRESLEYLDLAYSP
LGILISLVFGGIMLGTLTASGLWRLSGGQLVGSGSMEIAAACKK
>4eef5ea1-b3a4-4a32-a83c-69d5a025799a (mRNA) 114 residues [BFAB_07:1996805-1997811 + strand] [peptide] name=Bfab07g05350.1
MQISPPRNAHAFSNKRMLNSTPYPNYASSRPRQASSSSSLRIPMAATHRNARERAPIRQV
QQPESEVSIIVTTWDDEGKCWYPVEAYGPIGEHLNKFIEARRRAKQMSERRDSE
>2e645496-7477-47a0-b54e-9f26b629f97c (mRNA) 444 residues [BFAB_07:1998689-2000378 - strand] [peptide] name=Bfab07g05360.1
MSHKQKHISDIQYSKVNSIMSTILPSNSRVDRYYTRSPPPSNKSFRGKTEISHATFMECV
SKEGYNTRKMEQQRQGRWAMEMNQNQSAKFLDNLSGHKKNSMLNLAYDQTLNDAKESAVS
KMKEKKKRSGDPRKSAAFENSYSHVSSTVAQSSQAKYEAARTGPQVTYQSRTQGMHHQET
NTNSAYSPWIQNVGGTKRTDKQHQEKDSRLATAAKTKKDRYHLRIDDRYVKEKPQKDQFN
TRKNPEPKDYDLESHREDQQLYTSAYMPTPTRNENPATFEEIRDNATRAIEHRQIARAEA
TRDIMESQAVRARIEKALAQRRAENPHEETSEGAKLPGEMITETAVAPLASTPFEDVPET
IKDVYVGSPQTSNTAINTMESNAKNTASETATKGSKIYGSMDNYRIEFIREDEDDAENAE
DDWVEVMGNDEDDDEVEEDGWLLA
>dab279bd-d9f8-4154-a368-65a4c1e362d0 (mRNA) 139 residues [BFAB_07:2001075-2001880 - strand] [peptide] name=Bfab07g05370.1
MAPSRKSKYLAMMPKAAEGDSELGIQEFETSLQEMAIEIENAENTLNNTVQELRQRFIIS
TGAINKYESTKHVAASIDTKKTGVQGDGIEDTIKEVIEEVTIGVLDEAFIQKITPDEESA
KQTDSKDIVPKEVVEQDKI
>82dbe41f-098a-47f2-8f16-a5dc746c4e23 (mRNA) 233 residues [BFAB_07:2002340-2003500 - strand] [peptide] name=Bfab07g05380.1
MMDFPRFVPQFIQLQNKHPGESDSYNCSIFWETAIHRLSRHVISGKDQKVIIDNYKAKCV
EYYGDTVNHSYFVYAWDKSISNFFFPGEKFVGSDPDPVYSEVFAQYFNEQAQVRDEMDEC
GVHVIEQIDVLTGLSKVYNNQLQLTRRPPKYSPRNVSVNFNRADDQSTGPTRNHEDRNSE
DIPMEDCDVESPQLRSLMEKAVTEILGEELDGNWVMVKDIQDNDWVMVERESK
>a312a5d5-dc85-4505-b142-5dfde9acc803 (mRNA) 236 residues [BFAB_07:2004485-2005545 - strand] [peptide] name=Bfab07g05390.1
MNQTARALSEISQASNFNKGLLPLEPYEGLDTPPQLEYKDQISWIATHAKNHAPSAIILS
QAKMSTWQQMLTGLETVNRLRHPNVGEAYIKWRSQSMLVRRLWEDAKFPGVDPDPVYTQI
RRKYCTAVKRLINEKAEQGEDDIGALIFLNETYNKKLMLARKLEISTESFSDRIRAIQAK
KAQESQEAEKRIKEIEAEEEREEMMEQSGDDEFVVVEVEDADDEEFDWEDDDWDML
>8f298ecd-dc05-4852-a154-2f92f03ec9d2 (mRNA) 805 residues [BFAB_07:2006021-2008707 - strand] [peptide] name=Bfab07g05400.1
MTSSPFLTDEAQWIWVPDFDDTTDPGQFVLFRKAFTLEKLPIEETVLHVSADTRYRLFLN
GKRISFGPCKSYPTRWYYETVDITPLLQPGKNVFSAKVLRFSATNAAGTSMARTPLPGLI
LWCQIGEQKLHTDATWKAAKDQETSLLPSSKWDFRMGPPFLDLNEEVHANNKLLGWREVE
FDDACWKNVEIRTMKRKMSPMLDPRKLTPRPIPHLPEISRRFDNAVTCSENSSLSDWNML
LQNDRPMKLEAGTNSIVEIESNSLTTGFLEFSFEIEGHASLAPKIEILCAESYENDMDGG
QSRSKEDRTNFKTGKLYGPIDTYICHANQTKYSYEPFWWRTFRYIRISVTCPPHTSLQFN
SITYRSTHYPLPITTTISSTPLVNKLHSISVNTLLNCMHETHEDCPYYEQNQFAMDTRSQ
LLFSYTISHSDLLARKTIHEFFASRRDDGLLETNFPNPGRSMNIPQFSLYWILMVHDHLL
HFQDITFIKKFLGTIDGILDHFSDRLNDLGLVGQFHEEGTWAFVDWVKEWFTPSRGFSSM
GVPKAYFDKGAATIDSLVYAIALRSGAALCEAVSRKDTASEYLDRANAIIRSVNENCYDS
NKSLYLDGPGAIGQSSQHVQIFAVLADAISGEPAKDLMRKTIHEREALGLAKTSFAMSFY
MFRAVAQAGIYEEVWEELIGPWKKMLDQNLTTWAESESMVRSDCHGWSATPMYEIVREIA
GIQYPTTKDSEGGLTTIIKPRHNLVKQMKGTFVIAGGGSVDISWDNSGVIKVLSSDDIQV
QLVLMGVTHDTKLLQGFEQSFQLEI
>00536b89-bc96-405a-bff5-d57dfc9dd2e2 (mRNA) 539 residues [BFAB_07:2008994-2011422 + strand] [peptide] name=Bfab07g05410.1
MATTNPPAADSKTTDDDVKLSAQHLERVETVHTTQPDVSDLSIWQTIKQNPFIVLCCIYA
NMGALMYGFDNIALSLCLNMVPFQAQFGEQVSPGTYIIPAYWQSLWNAMAQVCTGFGAWG
AGPISDRFGRRISFCVSGLISIAGTAVIYTATTPGAFLGGKMINAIGLGMALTTGQIYVS
EITPLRIRGVALSAYAFSMNLGYLIAASVAFDRVTIMDQYSYKVLFASNWVWPLVIVSFC
FVIPESPYYLVRKGNLSSATKGLSKLYNKSISVEPILASMVRITREEENQANASSETSYM
DLFKGTNWRRTRIILYTNGLNQMIGATFISNAPYFMITAGLSSSQASMMIELGIGFALIS
SFFTFWFMTFVGRRKMILSGISLAVVLFLIMGIAASVSSSKASLWCVGVTLQLVWFTIGP
SIGPSISLAGEISSLRLRAKSQSLGFFFNYSYSTVWNVAVPYMFNATEGNLSGKMGWIFL
ATSCIAWFVVWAEIPETKDRTYGELDEMFNERVPARKFKTYRTEIRVADAKLEDENPGV
>161da284-d75e-424a-8a07-6c0ebec086e4 (mRNA) 183 residues [BFAB_07:2011620-2012301 + strand] [peptide] name=Bfab07g05420.1
MKYVVQRVSVQTLVDRGLDMNEYCEEIWDKELNRRVSILPRTAILRNRIANTVCDISCSH
NLFESHVYLADMARAFGARVFCLNIPWEIFADCCCYDAMQEDCNIVLLDWWLIGDVFNDE
YESHLECADELQEIMTSQWVELSGNMNDTSEDSAWFKKEYGTLMERNEEIEAEIEASAVE
IGL
>f13f281a-7275-45f3-8d2b-72bf71cd7c45 (mRNA) 490 residues [BFAB_07:2012551-2014645 - strand] [peptide] name=Bfab07g05430.1
MAFSVWFQSSSIAQIAFVFICLAFSVKIIYRAYLTPMRKIPGPWYARFTHLVLKYYVITG
HRLHYIHYLHQTYGHTVLIAPTEVSCSSISSFKTIHRISKPFLKSPWYQNFVSKPEGVFS
MIDPKEHGIRRKLFAHAFSKSSLRTNWENEVREKASMVVKKIKRDALIGEVDILKFFMFM
ATDVIGHLSFGKSFGTLEKERKTQYIEDLERTGLISGIRAEFPLLFKIGKMTRVSFLETP
EDRLNEYGSLAVLNAKSQSGTAQNIFYKIVTEGKSKNAEAPLSDLDIQQEATNFIVAGTD
TTATTLTYLIYNILKYSELQRQLEDEVDTLGDDFESKDVEELPLLNAVIDEGLRLWGAAP
SSLPRTVPREGAELDGHFLPGSTTVSTQAYTIHRDPEIFPEPERFDPQRWLGPKSDDFKT
ASHAFGAGSRTCLGIHLARMELHLALALFFRECKGMRIASSQDESGMEMENFFLIAPKGH
KCMVTMRDGF
>da72e2d1-e084-4a7c-ad2d-f15e57e7b81d (mRNA) 592 residues [BFAB_07:2015333-2017561 - strand] [peptide] name=Bfab07g05440.1
MYLPFLLMLISQTVAFNAPSDVPTWCGKPYMSTNHSLDPGGQFKFPEPQHDPLLYVTIQP
RYSIFLESDEEATFIVDASISHVFGGSYTNTTYNTPGSNTSSPFTSLDIEIYNEESGALL
VANKVPVNSTGNLIEFSFSSFTARLQPYAVSIYATSPDGQQTYTASTKVYLLPPRTYGSA
VKIDNLYGGLYVQNDKNGWDGWYAIFPNGYYADGSYVTPDNVSLANLEAYAALGFNTINI
VPDGGLPDQSYPTAQLIEYWDKMDELNLFNLYDMRFAFQNSTRISEQVALWQNRTTLLSW
YTADEPDGWAYPLNSTQLAYSQLKSLDPYHPVSLVLNCQNFYYPEYSAGADIIFQDAYPI
AINATWSITWGTPCNQTYGDCGCDNCVGELEDVATRLDDIQNYQANIGPGSQGGLDKPTW
SVVQAFGESQYWQSIPSSAEVESMMMLSVNHDAKGLTYWIYPSTDSANAGSANLGKVLQD
SPAIDFLFGTKAIKGLGSALLDVSAWIVGEQMMVGIVNGEYVGSVDDIVISLPGDLVSLN
QTLYGDSGWTVSDGKLSKSGLVGLEVDILVVNLKSATNFSEHDSGGFHRDEL
>05afa90d-26d7-4a01-a298-b59057ea82a7 (mRNA) 511 residues [BFAB_07:2017853-2020124 + strand] [peptide] name=Bfab07g05450.1
MAETMLTRITRPRVSGSSWVVSVLMVLCSCITSTTFGYDGSMMNGLNILPSYTDYFHLNT
ATLSLNTAALWIGGAIAGLTYGQVTDIIGRRYALFWAAVGTLLSVILQTAAQNTAMFVIA
RILVGYGTSASTLTGPTYVAETLPYNWRAWGLGVLNDCYYVGGLIAAGVTYQTATYNSTW
AWRVPSLVQGIFSILCIAILPFVPESPRWLAYVGRTEEALIVIAQTHANGDTSNPIVLAQ
YKEIIDTIEYERNVGETLSLKQMVKTPVARKRVSLAISAAVISTISGNVIASYYLGTMLE
NAGITDTTTQLQINIILNAWCLCCALVGTYYADKLGRRPTAIISTSLLTVFLFIVGALTK
VYGTSTNKSGVYGTVAAIFLFQGAYSFGWTPLLYLYPPEVLNYPIRANGMGLFTFVLNGV
ALLIVFSFPFAQEAMGWKIYMMNGAWDVLEVGLIWKYWVETKGKTLEEIDELFEGTKHSD
APDLERIVQAETQPEEVVSDSIEVVVSRKSV
>d1ae3ffe-73f3-4b11-8f40-2567789cf832 (mRNA) 180 residues [BFAB_07:2020186-2022125 - strand] [peptide] name=Bfab07g05460.1
MGISGSQSHVHLLPQNQGGGDAKTSIDELFTRLEVGKATAVTKDSKLDLRMQGFKKPQSQ
IFDMKTRNRFKNFDMEEILPRLWVNQTPNFLIAYHRSGLFNNPQVSSVKDKVLEWERGHA
TLLSKFHVLLKRIIEVMRDSKDHRVEISWDGKGPLRVTKHIEEGNRVLPSDLLQEWDDLD
>0ed58418-daef-4771-b3b3-7374411bb240 (mRNA) 2351 residues [BFAB_07:2022204-2030865 + strand] [peptide] name=Bfab07g05470.1
MASLVNDPRVARLDRFFHDVINGRRILSSVRDGKTFIEAICSREDPATTAYKLLSGPSGL
DAIQASMRFDTTPSFLNETSVLLLQYLQSPLLKAINSGLSLSELVTAIAEPPFFWDGFVK
AFKTGQLNEEASYSFAWLLLELISRPGKSSTTYVLVAKSPGILDAILSSANGKCRNLGQK
INHTLSLDASDLDKDLDVGPGGRHNNDHANHREISIMPTADELLSKELPFLRTPDTYLKN
ADPTRLGIHIDNQFRLLREDMLGEIRDEVQKLQGSKAGYHRGLTFDNIRVASIHIKGDKF
REPWGLMFQCQDELPSLKKIDSKNQSKRVNYLKENRNILRQGTVGCLFIDGEPVAFPSID
RNEEELAKKPANIVLQFQDETTVSRTLVKLKVAQKVKLVQMDTSIFGFEPFLRRLQDMND
VPLAEKLLSWSEDQFDSGPPFQPLQLKDKIERSSGKDLSSLLSTGKSIVLDDSQIQSLLA
ILFQKVSLIQGPPGTGKSFIGALGAKVIHNFTSEIILVVCYTNHALDQFLEDLMDIGIPP
SDMIRLGAKSTPRTQSLSLSKQGSSKLDNSQWNRIHKLEESLRRHEERLKSAFARYYSTN
VSKQQILDYLEFLDDIPFYDTFLVPQTTTNGMTKVGKKGKAVDKFYLLDRWTRGQMNAGS
FEHLQHKNSKLVWGISPDQRARMLSSWKSAVTEEMVAELDKIGKQFNAEQAEKDKLLGQR
DVNIIKSKRIIGCTTTAAAKYSTAIQAASPGVLLVEEAGEILEAHIFTALGRNTEQLILI
GDHKQLRPKCNTYGLKVEQGDGYNLDMSLFERLVLDGFPHVTLTKQHRSRPEISSIIRHL
TYPDLVDADSTKNRKDLVGFRDNLIFVDHTSPEHDMNVREMRDNVESTSSKKNDFEADMI
LKCVKYLAQQGYGSDKLVVLTPYVAQLRLLLDKLGKENDPVLNDLDKFDLIRAGLYINTG
VKASKPSLRISTVDNYQGEESDIVLVSLTRSNSRHDIGFMSQPQRLNVLVSRARNALIMI
GNSETFIQSRKGTILWKSFFDLLKYSGHFYPGFPVKCANHPDRTATLTTPEHFEEQCSDG
GCNEPCGALLNCNTHHCPSKCHQVFDHSKMLCMEVLQQKCPEGHTNKSKCHENLPMKSCP
KCERKKQDAAKQAKKELAEQLRRDEMRQKHQKELENLQKEFDRVHQEIQDSQLRKEQDTV
LAQKRMDLSAIKDRLNQIQSTPIVNSSASTTKSKSPATAAASPIIHSGTPTSTSNNNPSQ
PRAVQAQSPQKSKNVPKMLQTRVGQKVSASKKDWQRQKDQENAINPAIDKIMEMIGLEDV
KSQVLRIKAKVDTSKRQGTNLKKERLGLILLGNPGTGKTTVARLYAKILTTLQVLPGDEF
VETTGSHLAHGGVNDVKKHLAILNSAQGGVYFIDEAYQLTEGHNVGGKTILDYLLTEIEN
LVGKVVFVFAGYRKQMEKFFEHNPGLQSRLPYTLHFEDYTDAELLEMLQYQIHKFYPSPM
MIEDGQDGLYMQIAVQRLGRGRGREGFGNARALENMFARIRERQADRLTKERRDGLGPDD
HLITKEDLIGPDPSQAILKCKAWDELQSLTGLKSVKGSVNFMIDVIKANYERELKQKPII
QVSLNRVFLGSPGTGKTTVAKLYGRILSDLGILSNGEVVTKNPADFIGSHIGQSEENTKN
ILATTLGKVLIIDEAYMLYPSSKGSHGGHGGSDIFRTAVIDTIVAEIQSVPGDDRCVLLL
GYEDKMSEMFQNVNPGLTRRFPLADGFQFADFNDQELEEILQQKLSVYGLDATQKAVSVA
IDLLARARNGLNFGNGGDVENLISKAKKNYLSRQSKLPFAQRSIDFLFEPEDFDPDFDRA
SGAETNLKDLFKDIIGCDTIIAKLDGYVKVAKGMRNLGKDPRPQIPMNFIFKGPPGTGKT
TTARKIGQVYYDLGFLSEVKVVECSASDLIGQYIGQTGPKTIKQLELGLGKVLFIDEAYR
LGQGHFSQEAIDELVDSMTKPKFSGKMIIILAGYEKDMNTLLTKNEGLNSRFADEINFPA
LSPKDSLLVLQNALEKENISIDGLKDITDHQPFLELIAELSRLPAWGNARDMITLAKSMT
RAFYQSATNTSSNNPNINLSYDDAMASIQAMIDSKKDRALVQGQPRGKSSKNLPVMSNIQ
QPPTPPSNSVNTSTSTKNTSNKKDDDKPPKPLFEDDELDDDDCRDAGVSDAVWTQLQRDK
KAAEEEAQRYANEMRKKQEEMQALQEAEQKAREEMMREIQARNEAERQEQLRLREEARLR
ELKAKAERERLEQERERIRLEEEQRRKKEAQAQAKLRNLGVCVMGYQWIKQAGGYRCAGG
SHFVSDSQLGM
>728b68e2-c298-4d70-b074-b586cebc9f0d (mRNA) 976 residues [BFAB_07:2031451-2035666 - strand] [peptide] name=Bfab07g05480.1
MAENANDDHAIEGNSDSFLASLSPSPTTKPDVSYFHCQHPDCGRSYASKHGLDNHNKVHF
TDNEKTFICPHPGCLSRYTNKRGVTRHFNSKHRDKSGWFNCPTVDCDSSFFEERGLKLHQ
REHGVFRCTAKHCAYEYSTEQELHDHRERNHTKSDLYEDRTSKRPTGISKKEDSSAQNSS
GEETGDEIVVDENPLHAKFSEDEDTFENSSPFKTPTYRKSSRNGISKKALLYTEYPARPN
SKGWKCPKPGCTVCRKVQFDLITHWQEAHSDIPEPAHFEFVHGPKSSENTATPTFGVNDH
RLGGQSTSAHQPARPNQAEETRGNVNDGARGPNTQQQREDSANTTGNKHTKMNELNAQNA
ATSTPSNASSHFPAAASPQSRTQRSNNGPPIIPPPRHASSLARPTTNVLANFTGDLSGPA
EGPLIKTPRRKTATGLPAQRIFARAMDTRRMSPPPPRSKQAAKSAVALANARMRTQRRSQ
TSSPASSRRASPISSDEEEEQEEEEEEEGLFVSPPGKAKNKSKGSRRVLGIRGFANMPLP
RDQDSDEEDLRPSHVLRQERRAIAGKSVKPIRAGEYFGVGRKIYGEPQKMGKSTGFLATR
LTDSDDDSIFEGNELSSSGSSFGETEAPRSGRRSTNHVNARASNSIPRRPSVNNGDPPRT
PSPDLPRYQPYQVYGPDLDSPPPSYLIKSPGTIDRTLPYPNRREDKSLPDVAAVQPEDLF
DADDIFFGFQDMTPHEREVQDRLDAEKEAMRANSYGSGFRAPLHFDHCPYTAPICRAERA
TWIAERLRLDVAEALGDESEDPESPLGMNSDDDRRFGVDVEMSGTGKSTLSKKKKRATCS
GPVREKRKYNWNDPMRKNKRRKGSISAGTSRGIRTRRSNSRGDAQIDGANEQEEEVVKNR
KPAWAWSEAHGSVIDTRKPVELVRPGTLAAEGGVATIDLVDRASATHSVALDTLNASGAP
VTATGSAKTSFVLSDG
>0c2b381e-bdd3-44e9-9be7-7046c121d1b7 (mRNA) 472 residues [BFAB_07:2036881-2038842 - strand] [peptide] name=Bfab07g05490.1
MSNSIDNRTAVDRLRALFNNPNPEPEYEPISSSSSIHEDDVRRPVLVLPDQAESEPFSWF
EYGIFMLIGVAMLWAWNMFLAAAPYFQSRFQDSESILQHFQSAITSVGTITNLGSMLLLS
HLQSNASYPKRIIASLVLNTVVFTLLAISTSYFRDVSSSGYLTFTLIMVFATSCATGLLQ
NGAFAFASSFGRPEYIQAIMTGQAIAGVLPSAAQIATVLAVPPPDHWADVTAEVADVKEN
TTSAFVYFLTATVISVLTLVFVYPLLRKQNRVLESRAASSADSDEEIDENSKHEVVGMVR
LFKKLHWLAGGVFMCFTVTMFFPVFTSKVVSVRPADGAPRILQPEAFIPLGFLVWNIGDL
CGRLLPLLPFHAKARPIPLFIFSILRIGFVPLYLLCNIEGKGAKVNSDVFYLLVVQAGFG
LSNGWLGSSCMMAAADYVNEEEREASGSFMMTNLVAGLMAGSLLSFAVAGIS
>fde40bf3-f07c-4e02-8107-46c7570e061d (mRNA) 562 residues [BFAB_07:2041320-2043246 - strand] [peptide] name=Bfab07g05500.1
MMDGEKGYQSSRELERRNKGREEDKSKERRDGRRDERRDKKEREAKTRRELVNPEPRKEI
RRTSQSVETGRDRPHSGVDSGLKRSQVNSGSRSSAPVPSNDSRNSIKRVEKPPTTTVCNT
SLPIKRRDHSSNRGPNGSDRDSGQRRGRGDISKDIPNQSKDERVTVPPSSRRDRSQDLRP
GRRDPSINHEIEKLKLSDSKISKAAATDNREKRSRDEPAPKIPTSFPHNKVRIGVLPKCY
QPCNDGKARRLIVFGDVHGMPDAKNRLLAWIKYDPALDHQIFGGDMITKGRKSNPSKNAT
TKELITIEASKDVVHQARRDGASGVRGNHEDWVLNVKHERNGWEEPIDREMDNQFNIQAR
KKLRTPDHRDDSDYDLYDALTPGERHWLEDLPDILILGKCGGRNNMAVVHAGLNPFLDLK
DQRVIETMNIKSIDPARGHTSSMHKDDKERKAMDEKDQKRFSKMIPWFEGWENKQKRLPP
NERMTVMYGHESKKGLTIKEFSIGLDTGAQRIDKLNPDKYRTLTALLIYHDKCTIVQVKE
IKKKTGKWEWEPVELTQEESNF
>8fb49f1b-cda0-4848-92f3-b6dbdc1132d8 (mRNA) 350 residues [BFAB_07:2045057-2046434 - strand] [peptide] name=Bfab07g05510.1
MWRDRTNLYISYRQSYAHHPAKKPKYSSSSGNGYSDSIGGASEERRGLMSAGAFEDDGDA
IIEMDLLPPRWADISDEVTEHLTDIANKSQKLEKLHQKHVLPGFDDEEVKKKEEREIELL
TQQITKGFHDCQRSIQRVEQIVRDSRHQGGISKGEETMARNIQISLASRVQEASAGFRKK
QSTYLKKLRGLGGMNAPIERTSTPLYSNYIDPSIMESDADKSFSQATLQQTSQKQLTSND
AAIMQREREINDIAQGIIELADIFKELQTMIIDQGTMLDRIDYNVERMAVDVKAANVELK
VASGYQRKGTKRRIILLLILLVVGMFILLLVKPKKHRGEAEESVPPPSPP
>a564d676-2a0f-4c98-92f7-fd74a74cc08a (mRNA) 149 residues [BFAB_07:2046639-2047972 + strand] [peptide] name=Bfab07g05520.1
MADSLTEEQVSEFKEAFSLFDKNGDGQITSKELGTVMRSLGQNPSESELQDMINEVDADN
NGTIDFPEFLTMMARKMKDTDSEEEIREAFKVFDRDNNGFISAAELRHVMTSIGEKLTDD
EVDEMIREADQDGDGRIDYNEFVQLMMQK
>c2c56573-59df-433b-bfe4-d2a17c62f6ca (mRNA) 633 residues [BFAB_07:2048614-2051146 + strand] [peptide] name=Bfab07g05530.1
MPSIIKRWRAAFIAAVFMIFTLHYLHSRRNTWSYDATYLSSIGKLHLPDGKTHWSKLPER
YPVTSYIPLPTGKPKKIPQIQSAPPKEDAAQKEERLKRLAAVKESFVHSWEGYKAHAWLR
DEVSPLSGSWKDTFGGWAATLVDSLDTLWIMGLKEDFEIAVRSIEGIDFTTTEQNDINVF
ETTIRYMGGFLAAYDISGAKYPVLLLKAVEVAELLMSCFDTPNRMPIPRWDWKKYLEGED
QLAPRRVLVSEPGSLSLEFTRLSQLTGNSKYYDAVQRISDEFEKSQNSTRYPGLWPVSID
LQKLRFDEDTMFTMGGMSDSTYEYLPKQYMVLGGVLDQPKKMYESFISAAQETMFFPILN
EKNQNIRVSGDVRIKGIAESSTPELIPRGQHLTCFTGGMIGIASKIFDRPSDLALAEELT
NGCIWAYDNSPNGIAPEIFSVVPCPKNHDCTYSKQKWYDALAAIYTHPITHTEEETEKKL
KEIIEERRLSPGFTAVDDRRYILRPEAIESVWILWRITGDRKYMDAAWRMFQAIEKICRT
EIASAAILDVMVKAVLGGDGKGKNGNRKQEDGFAHDLGETSGEEGVEQVDSMESFWLAET
LKYFYLVFSEWDVVSLDEWVLNTEAHPLKRLKR
>4fa04e22-4346-42c9-95f7-56e12b23410d (mRNA) 169 residues [BFAB_07:2069215-2070084 + strand] [peptide] name=Bfab07g05535.1
MASTPETSCSPFPYFEVHSRDLVLLVMMGLVWVVNIHEYYERYDYFQVYCTGYSRAWRNA
EIATKYRIIKTLAQTKDCDQVMVVKRLIKEWDAEIDHYLPEADEISREKGSKNPFHDIWY
DDYEEDMMESVLYKLSKKPRVYKRMWIYQQFEKLFENKSSYKDIEKAIV
>24e88b8b-d909-490b-a360-11d10e974012 (mRNA) 2941 residues [BFAB_07:2125508-2135435 - strand] [peptide] name=Bfab07g05540.1
MSSFIEAIENGLLPGDLRDRLNHASELWPGDPRSAIDWFLEGGNVPAETIAAITFVRSLL
FYFDDEEYVCGKILTLLSSYDIEGLAALLFPRNLLDQRVTATPASFPYNWTTTNLTIAKL
EEVRAEFLDNHSLIVSLILLREDKFSIEERLQRIADCILTAMIGDELEIGSPELLVYVKK
AFSDLKDAEFSAAIEFIKTLKIFSSLVEDPEDVVHLYNSNYHSVRSITAQSKSNFKNALV
TAGASVESSLKIYDCAERVDCWNEQLWLHLMNSRRADSVMIDPYFEGDTTDVPSDESWMG
KSHNNLTDIFRLEDTTCEECCSITSLSAYFADLLSLLSNTTPTGTNSQYDDPPGTRNSLL
NLLSQRRPDLRNLELTCANSQTLIPYISLVNEVLESFIRHKCLGSPDSIRVFNTPIDAQD
DEHSPTPLNLPGNTDYEVYSKIISKQRFPFNNFPYDQARNMVLSYFDIFQVSHFDFVEKF
QAPEIILQTITAATTDQVKRSLNLGAEEVLKRQRAAEALDLHQMEFAAITGETFYPQSFS
DLLKGLSSDTIIDTKIQEHEFCQMWGYEDDETMLSATEGLTQIKNQLMQRSGLEFQDVLE
LVKTQLFDQQLVITNEAGSNEFTESLAELRLLSNASSPPFQPLTSNICRNIQSFLRLKAK
LGWSTKVLDAAIHCLRNKEMESSPSFRSNTVSQVASISVYVIKGIASIVKLSDLCGLEPA
ALIPLWGLIDSFGDESLLHRKFLSSSLGEVFAVPKDGAYFQPGGKIVKIQECGASICASL
NWRFEYFNDLLGATNLANDDLNIETFSILYRYVTICRMLSVPPKECVPFFKIFFDEEDHL
ANPNKTLGTITNWTMLLNSGWTIEALVLVLGKSTSDESSITLGNPGQKLASALLDGTKDS
RKSFSSLFNGAAPTHETVVECAGRSFDSITASLVVEFVEGSQVRTNTATLETKQDLQSLI
NLSKNWPTKISVIPSSTTNTWSAQLKLTGILAANEKKKIMDESAGLPVVKTALQNLVENS
LFPQAVIMSRFQSNINKLTDDILLQDWASTKLSADPVPSVNEISIETESQVQARRVAFVK
MAKPVIIQDTLTTSILNTMKDLVEGVDITVLSTLLTDTVKLSTNENDAVESAMAALKQLS
VPIEIMTKAKTLDAYFTPTTTDDFKLHYTGALNSTISLMINGIEVPFDQNSKTWSVFRMN
ARQPYLLQSSIPPSEISWSTCRSMMTPFTDEELQPSTSIQQATLILEAIQRAVCICQTLK
LTKSELEYIDRVGKSEKEMLSMNLNTPSLINLVQLQEYRELRDNIMIPGNIMISDNDLIS
LFSWFYNPKNPDMKTIAAKIAASTGWKDTLVESVLNAKYPNHTPADLVAVLRNHNAFINL
KAILVIYDGLGNTSDVTSKPLMTELFYLAKPLSQLNSGDTYMEAAKALQQRLTPSQREAS
DEGLMESQRKTLVAYLLQQKFITQDLGIWDADGLFEHFLVDVQMGPQIRTSRIKTAISVV
QMFVQRCLLGMEEGVSKSVLGHEKWDWLQQYTLWEVHRKIFLYPENWIDPMLRDDKSELF
DQFEATLMQKDLSIKTFLQAIQSYLYDLDGISSLDIVAYVHEPQPSASDIFHLFGRTRSG
PYTFYYRTLTRLRTAEVFWQPWSKVEVDIASIETEWEGQRLIDTGSYLLPIMIKGRLYLF
MPSIVPKTLVKNISSMSKVTTFDDLRKEKPNLAEPVRIWEITMAWTEFVNDSWTPKKVSS
GSLSVGLEASSSQLRVDPTLQENILTLQVSYGEAEKTNSKVIGSFIFCNDQISISNAAAT
STQAGSFATYFQKALKQGMDLESLPGGSKYTNSSPLIWVPPELESAKGASDVSWTLSKLP
QRVTGLVVSAKISEGRRASFFNIPKMELLSSTWTKDVIKNNTELVSIDHIFSHELMEATA
DRIDPLRCLYNKIAQLPAGVMRESFGAGSHEAWYHELGRPTALYNWEVGLHTVLLAVDRF
SATQQYEEALEVARLVFDPSADLELNVDDKLTYRSCWRFPPFQEMARQIAIRGETSFDPL
NLDHLSKEIQLAIKERRSYGSLVHAAARGRPISYMKWIVMKYAEILIAMGDVYFRRASLE
SLPIATQRYIEAARVLGQEPPKVPDLGKRKRKAMTFEQLREEDIMYDSVVFDLGLPFSAK
LKKGAAEIADRDPKKENIACFLRTNYFCAPLNPKFKQMRSLVHERLYNLRNSFDIQGKPV
IYGLREPPIDPGALIALSKGGMGVSDILSMVSGERNSPLPRQRFDALLKQALALCTEVRK
LSGRLVSVVEKKEMETFNIGNAQHASVIQKMMLDIKNVELEEAQQTVESLLINRSSLEAQ
LNYYLQLIGEPDSMIPKPKDEWVDIQQSIDTPTQDELRMSSYEKAEMTQSLSAGAKNRAA
VATDALSIPLYLVPQATTNFEPLGVGGSISFAGSAIADAVAAGSTLARGISAVLVDEAGR
ADKKASLTMQLRERRLAANMSGREIKSIDKEVEIQKIHITSIQKDIEIQISEIEDAAGAE
EWYRTKYTSEQLYTWMEKIFRNLYFQAYELSMTMALRAESSFNFEAGSRSSIINKGGYWN
PSQDGLLAAESLYLDLRRLESAQLDCTAADYNISKTVSLKDFDPMALMKLRITGTTDFSI
GELLYDMDFPGHYMRRIRSVSVSVPSDIESETNTNAVLTLLEHKYRVTQSAADYAASQSA
TGSEAFRTDRIPITAIAVSSGAKDSGVFELDFSGPRYMPFEGAGAISTWRLEFPAPIRHF
NYESITDVRLHIQYTAYEGGPTLRKAAKDAVVQAAQTVEAQGQHQGYWALWDLKTDFAGK
WADFEKTLLTPNVVATLDLGNLKDRLPFWSRHQKELQVQSFTLMSRNKNVRDRLSILVDP
NSPAYNGTDGIYSGDLFTRQCTMTEKNLNWKLKANAVPVAAVASENVYLFIRYVYVGKTI
S
>35865052-ce5c-41ac-b679-e0adecd7ef94 (mRNA) 804 residues [BFAB_07:2136321-2140131 + strand] [peptide] name=Bfab07g05550.1
MSLSLSSGPVKLDTSGNGDGLQHYDQVCAISQAAINRGFVKLFEKQPLAARSIHWSNEDV
FDGQLVATMLPPQIELDVESGDSSKFMLQLRFDQGRIFLGQNTYQTIDGWVIAFTPLSFA
DCLNATSGDLTAAANVEDTEDSVVFKSDTPTKLCPGEYSIHRLFAAIADLSWGSIIWERS
YMVQPSRQKLSLEQWAKDPANNALYNEVQQCLREWTLENKLASCFTQGMLLKVPKAKVSS
GKVTFAARALRLQNYPYIDEERQIQLSSSKQSMKGINGSPYNCLCFCEVVGSRVDLPTTK
FLPFTGNLAGPGKGTSGEYLGTFILDRRLVSGGTQLLSPLQDLCLAMQTIPFGPEARIGG
NYLASGRRLRVVGNTADLTAGKPYRWEQVKDNTGASTRYLANISGRKTRTTSMAKITIEA
GPQMTALTVRGEYGYTCRSEYSSLVISDIASWTFTISVSGSQDMVGNLAVLNNPKAILGG
CTIEKDPYTGLDIIIPNDFSANLTGTPSDPRWVLIRSAMRVNIGRALSKLATDLKFFQGI
NKLTYGGNGEFTFGPTMLNEDLSAFATINFFPKESRVDWPSLETKGAGDNVVIEKYTSDT
SVTDLHPRLNWTSLVNVYDSAAQTIDLTLTASNSSNDGIAFKSISVICLKMKGLEGKILF
DTGLEHWNVEDSSVQSVKPWSITTEKITQALDLSASVVNTGLQLKVFPAVLGTLHDGTDL
PSKFIVPSKGSFTLKLKGPVHTKSDAGLYIVQLDEVWTGIRAIKPLEGRASTFLVLELKA
DSQNPTPYAVTQAEADEKRGVSHA
>c65adb16-5f51-46bd-9fb1-34fa14f9d617 (mRNA) 339 residues [BFAB_07:2140554-2142878 + strand] [peptide] name=Bfab07g05560.1
MSQGVTISTTLNGVESISPDAALWVQNWEAKKWSDVDVNGVSGGIFIDDPVIISLPNGKV
HAFATGTDYNLNHKWYSQSTGWSSWVSTGRQTFSPPVVTHYGAATANTFAVLILGLDHLP
YGGISTSDTDFTWTAIGDKAKKLRHNSLVALDRSYDQSISIVGVELTTGQLFHTWTNVGT
WATTWETWAGVSYCLSKPTIVCSKPSCIDIFVIAADRGLWQLPHRPGTGWGTWKNLYGLY
LYDPTSISVSPGRVDVFGIGSDGKIYQNTSTASGNEVATFTQKCIGVPSGSSPKVQVTSP
GVFSVTTRKSKGVYQQIVYESSTGVWAPQGGATEITPSN
>80e3ed54-221b-4471-b2b0-63a3d5358302 (mRNA) 604 residues [BFAB_07:2143114-2145226 - strand] [peptide] name=Bfab07g05570.1
MTRKYGKKRPAASAAAVAIFGSTPQSVASVTKNSTTIPKSQSSQRDLTEITDLLENTTLK
ESTDEVTILLEKTSLESHVDNLNKPLDPENIRQDSSSKDAPSILEETILDSTIETITCLE
KSLALVEPKIEIPIPQTPVSFSPTPLPINPRLAASLLPLLAAYEKDNGYPLATKNWDDVL
APGSSIQKIAEASYAEVFRITNPVGSSILKLLRLKVPTDPTSKKSDTAIKVDTVVSEMRL
MNALTEIPGFVNFKDAHIVEGKPPAAFVTAYEGHLDAGGESYFPHPNKISKHAVFLAIEL
GDAGHVLEKYPIKNVDQLWDIFLGVVIALARAEIEHEFEHRDLHENNICILERTPPSDAP
KANSKSRSKTKPQTPSSPHKFGNSGLEITILDYGLSRATIYPVSSTSNPSPAPETVFYNL
ESDTAVFSSFEPSSIAGIQFDTYRRMRAYLFSGGLSNTNVNTPSKAIRDAIKQKKHSWEE
YMPYSNVLWLYFLMEYLTEVAPKGGRGKKGRQAWLKETEELRWLLDPDWVPGNGASDDKQ
EGEEEGEEEEELGLGCAGDVLQYAFDMGWVCEEDLGGADTSRLSLREDSFVELEKKKKSL
SSPK
>da6e6985-fed1-49b9-8ff9-6047668454d6 (mRNA) 449 residues [BFAB_07:2145741-2147349 + strand] [peptide] name=Bfab07g05580.1
MAALLNGLFGSSEPSAAPVQAGDSDFADFAGAPDPTPAFSAIPSAADYTGPVATPTGAAV
PYTKWYNVHERHSLSEFKQEGIILGLLIIIVSIHLFGTGANRKKAKKWMSAHAPVLRKEF
ALVGFGGRAPTTQEIEDEKTAKSMAKQLELPEDLLKEKSPQDYATYATGRQNIAFLDVNI
KLLKRYNPFALAVEYAFSLFFDTIATPVERMEAILYPFDGRENLTVPGQAPGAHELRKDN
KSTYDNFVWAIVNKETMKSLRDDRYDVSITGTKDSPKLPNWATVMSESAEVTDFLLTPAL
IEAVELAGDLLEHLIITDQPIDQPLKLDDTVPKKRIYLSMKLPSGDDYSRVLPLFEHFIR
ITDQLASGAHFRPEVMRKVRMTREDTIKRLQKADEEEKAEERALEREKAKKLKRDLELKG
LDAKAQKKYLEKEKEKEMRKAQKKQTQRG
>0e58ae54-111f-46b0-ad79-bd6022f2af66 (mRNA) 421 residues [BFAB_07:2147595-2149564 - strand] [peptide] name=Bfab07g05590.1
MDSNTKRDPKTHMVEVDFESHAEAETLDISHVKLSNTYPKPGSTGKSPRLTFGVELEIAV
GTLRDICENPTPKDLRRVYGVGRPANSAPLKHDPRPANFGESSVAERIYRLEGRLCVYEN
IAQTLSCAGFPAIHMEDAEYQKTGYTNEMTSKWIIGTDISIDLPDESIYDYHKLEIKSPV
YYYSEEALNDVKRVWEIIASTYKVTTNESMGLHVHVGNGVDAFDGETLRNLWGIIWTTEK
WIETIHPPHRRNNPFCQSFHRCSNLGREIGERSLKDPEGEVLDWILTRTPPTVREFLDTI
CMQSGAYNFVNLQPSQNVGSTKRTIEFRQHEATLDTERITQWIRVCVGLVKASAAADPAV
LDPYLRLLVQTKREKLRVWEILKEAGLETPGIYYKARMLRERPVGIVVKELWEKTTRFAK
R
>529c30f4-5ab6-493a-baca-e88bec009b55 (mRNA) 180 residues [BFAB_07:2153334-2154101 - strand] [peptide] name=Bfab07g05610.1
MSLSCQSAARSCIRSLRSSSSLRVSTASLAQRRNPSARWASTEAASANPKISGIVDQISQ
LTLLETADLVASLKSRLNIPDMPMGGFSAGPVQAAAPVEEEDAAPVQQEKTLFNLKLASF
DAGAKPKIIKEIKSMLGLSLVDSKKFVESAPKMMKEGVPKEEAEKIIATLKELGAVVNME
>f0e84fb6-eed6-4076-87c6-f47207d722b1 (mRNA) 4956 residues [BFAB_07:2154184-2169423 + strand] [peptide] name=Bfab07g05620.1
MEAIQDRNNPDITMESNLQTNLPEEILEIVNLQQSPHFLETLAISALKPKQTLKLFTYFN
SLIADSAARWVANSHLGTQKNEIIEAFSRILYLAPHLTTFLDKYLSETTPSTENGSSRSI
ISLGDGASVLSNGQSDLALQRILLATWRLLNFDKQAYSGTVSNSTIQSLLGHTDIAVRYL
AVRIFCQLQFASDDRLEAMFAKFVGNTMAVMGDFDGEMVDYGFLSIFEEKRLKNAALCLR
TETEMFQSQKVLQEFSPLVVQYSDVLLPRPNGYPSQPSKLISTTTTAQNRESFANALMSS
SPILLHGLAGAGKTSLVNDFARELGMDSSMVTLHLNEQTDAKMLIGMYATGSTPGSFTWR
AGVLTTAVKEGRWVFIEDLDRAPNEVISVILPLVERGELLIPSRGESFKAKAGFKLLASI
RTSLNVSGGEIPPALHMLGARMWQRVPIHMPNQDEFREIIEGTYPILRQFLPGIISVYER
LYQLSIKPSFASKSRTSIGRPISPRDLLKWCRRLASVLTSSGSKTGSEPITDSTKYEMFL
EAADCFAGSLQSEESRRSVVSCIAEEMHIDPQTMEHFLTGHIPRYDDGDNELLIGRVRLS
KKRSSRVTKPTKKSRPFANTTHAKKLLEQVGVAVRMSEPVLLVGETGIGKTTVVQQLADS
LGFKLTAVNLSQQSEVGDLLGGFKPVNVRSLAIPLKEEFDDLFASTGISATKNQKYIDQL
GKCVAKSQWSKASKLWREAPKMFEKIVSELAKREETSTPTTSEQPTKRRKTESKLQSLLK
LKSRWSRFSQSLDQFDIQLSAGSKGFAFSFIEGNIVKAARNGEWVLLDEVNLASPDTLES
IADLLHGGTGSPSILLSETGEIERIQAHPDFRIFGAMNPATDVGKRDLPMGLRSRFTELY
VDSPDKNLDDLLAVIKAYLKGTSSNDERAAHDVARLYMNTKRLAEEKRLVDGANEVPHFS
LRTLTRVLSYVTEIAPSYGLRRALYEGFAMGFLTLLDRESEKMLTPLIEHHLLDSHGNPQ
ALLAQTPKHPEDGKQYVRFMNKKRDRQYWMLQGYEAPQEQPHYIITPFVERNMLNLVRAT
STRRFPVLIQGPTSSGKTSMIEYLAKFSGNKFVRINNHEHTDLQEYLGTYVSDSDGKLRF
QEGLLVQALRQGHWIVLDELNLAPTDVLEALNRLLDDNRELLIPETQEIVRPHENFMLFA
TQNPPGLYGGRKTLSRAFRNRFLELHFDDIPEDELDFILEKRSQKVAPSDCRRIVAVYKE
LSRLRQSTRLFEQKDSFATLRDLFRWALRDADNREQLAANGYMLLAERVRNSEERAAVKE
IIEKVMKVKIDIDDLYSNNLAEIKAYNSTTNSQGVVWTQAMRRLYVLVSHALRNNEPVLL
VGETGCGKTTVCQMLAEAFGKTLHIVNAHQNTETGDLIGAQRPVRNRAAVLEQLKQDLLQ
SLDGVGQGQSESESLDSLWATYKSLPETTLSRVPIDLSSRIQLNQIKAKALFEWSDGSLV
QALKEGQFFLLDEISLADDSVLERLNSVLESHRTILLAEKGVENSFVQAADGFQFFATMN
PGGDYGKRELSPALRNRFTEIWVPALSDHADVIQIVEDKLNPKMKQFSEPMVKFAEWFGE
TYRSTSSTSISVRDILAWIKFMNECSTTNPHYAVLHGAAMVYIDTLGANPAALLAINPET
IHEERAKCLRQLSALLNHDVNAIYFTPIEFQDQNSHISMGGFHVPKQAGSDSDPGFAFDA
PTTKLNGMRVLRALQVQKPILIEGSPGVGKTTLIAALARACNRPLTRINLSEQTDLMDLF
GSDVPVEGAEAGHFAWRDAPFLQAMQRGEWVLLDEMNLASQSVLEGLNACLDHRGEVYIS
ELDQTFKRHPNFSVFAAQNPHHQGGGRKGLPSSFVNRFTVVYADVFRDDDMKLICQHNFP
SMPQELITTIINFVTQLEDEIVHKRKFGSQGGPWEFNLRDILRWLHLLTSSAPFLANRGP
ADFLNLIFRQRFRTTKDREELDGVFAQAFGSDVPFRQFYHNMSPTAYQVGIAYMPRHALY
QRTAFPQVDLVNRLPELESLIMCVQQNLPCILVGSSGSGKSTLLEHVAAASGKSLTVFPL
NADIDTMDLVGGFEQVDPRRAASKFLQELLEFMEGRILSTIPQQIPEDAIKVLDILRKNT
TNSFFSFQEISLHLRKLEQTSSLPEFGALAETCETFASRPMGVENARFEWVDGILIKTLE
QGKWLVLDNANLCSASVLDRLNSLLEPNGFLSINEHCGPDGEPKIVKPHADFRIFLTMDP
RSGELSRAMRNRAVEIFLEPLSPESDPIFGTQFSIRPEATLQRYRQMSKILDLQYLNPTQ
ADLINRIALDNLAWSDLPLLTRYAESVAQNLEQQGIPTARLSTISRQYMQLYQSEDSHDL
RNAVGDLLNKVAKKTLLPAGFSDAQIIHPLQNSPLVPLLQSTSNELQVQWIAACLEYKLQ
IAAALEAHQEQESVIQTLKPSQMNRLQRSMVSDRVASVAKDSTLRVSHFLMHTLQSINSY
LNAHVTANDHCKFRKQIITSLIRYWWSTFNLVTASTFEEATFQSHLTIGNTVMEELIKNN
PLVAEQNSLITTFVSELQTSFASGFKLTTGLSMESLWKKLRPMVPTKFEVMQIMDQMEKL
AVRFDALRWKASISVAELGGIMTSLVKAHQLLLSSDVDGAALIQTLTSEIETLEKSVDSE
EESPRPFLHDQFEALRQFQVLAALASNQQASDMVDIDTVVLADHPITSQMRLNTSSTTSW
LLQNIDYLWSGDHGLQPIAGSFSTDFLHQMNIISEVDLKSLRLLESELPVMAEKLAKSSG
ILSSSQLVATNQVLSNLASRIIGAHGDQIFNNYLNRKEILASQDVTEAWHKSTLDNFYET
VSAHQAKHFNGQPLIDPDINSDIEKAVFAMEAAIKSPKDNMQYSALAWVHFAVGCISLYV
PDRAFDPDKRQRLEQQRHEEVIQELQNKLDALQKFERLFSDQESNLRCQLLEEDIVEIGA
PPEASEQVYRPAFSELDKLQGEFKNLLKVVLPSPAITSKIYQYLINDDQDILNEIKLIQN
NVLQIIRRLSERFHAYSDLTTPVINILRCLQIGLYMAALISKDPSNNSKAALALSKATPF
LGGTPKSIDEEIISGQPLEYLTLMATTTTIESVDSLDPQTRESLFTSIHSCYEQWAKKLD
ADRLEGETRSGLYRFRGSAEDEDEIDQEQFNELFPSYDEENPSASSAISQQQNVRDTAVS
LARVHGDIFLGGPLPSESIMSLIKHISTHMGKLHGSDAEFGDQNRIKSLLPGSILLLSDK
IDALSSSATVAENYNFYTDANLPETRKLVSLIHQVQTRFRELQAVDEIAHMQPLEDVMVS
CKELLQFRHTEPLAKIITKVEKVHSFMHEWQFGGWASRANSALPLYDNLTATIVNWRRLE
LSTWAKLFDMENKQCDDDARSWWFVAYQTIVAGPLSICESVEELKAYAQKLLQDLETYFS
TAIMGQYVQRLKLLKQLEKHVDLLVLDYPNLSIIGSALANFIALYSRYENLVEDSLKRGR
VSLEKAMRDVLLLASWKDTNIVALRDSAKRSHHKLFKIVRKYRALLGQPMDSLIKQGLPD
EVAASEAKISYLPPTQFPTVDQSALALCASTVPSWTQKPKRFINVSNTVSMMADKSQFLG
SSVDGSTYLESFLENIITSTSELQKATPSILTEDNKDTVKHLKSQKRKLFADTLKDLRQM
GIKYNLGANALAKQDSLSLVLANTNYISPNGSQDLEYYFHKTVELAPRAREASRQHSDDL
SGAEVARSTGFLEGLLQVLLDQRNSLSNAMTNMKVLRNIIKMAKGLWTPEIYELKTASTI
SNHENVLQWLPNILSVGLELVNTHAKLGKVDAKPVVESLSSWKDIFVDLRTRWSSSSVLP
FGIVSTQRLELEMAINDATKQLTIDLRNLIEQRPDLGFVLDQILPWTVIDSSSTTAVPTK
ARLEDLDQKLSAVCNTILAAMEKYHGSISDFPTSTEDQGWLIKSDTTLVNSIKALHCDNI
AGQIKQSFSILQRLNLADDNVSRSAGAIFAVALPIIQQYYNTLEESITRYATLHRSTCKT
SYVLAKTFTQIASQGFCTPSEKQDAQDGKTEKLEGGTGLGDGEGAEDISKDIGEDEDLDE
LAQEPNKEERGEIEDEQDAVDMADGEMEGQMGEAEKEDEEGSGDEEKDGDEMDEEAGDVD
DLDPNAVDEKMWDGDNEQAEKDQEGDESKGKASKDEQVAAQENKKESGEGDEGNDGEEDE
EEMAGAEQSEEVQQQDDVEKHDPHADEGDALDLPDDMQLDGEEKEGSDGSDDGMDDGMDD
LPDMEDEAKETDEVANDGKEEADAENADGQEDQDMGDEMDVIDLDEEKDEEGEKTEEAGE
KADEEPEEEQQPEDQEGLLRDREDEATADTENAVPSDVQGVGEDQDDNEADKNADSNSKA
QRDDGGQGGDSSENKQSAAEDGEKGRQAAGDAPQNTQDDTEDSSAPQPFKKLGDALEKWH
RQQSQIREPTEQQDQAQDQNIDMGTESNEFQHLQDEDAEADTQALGTATEEQAHALDESM
AVDPETQDMPEIFQPDEVEKDAIDEDVMDLEDDTLEPKEPSNAYEGRAGASIHQANNNMD
ENMDDNTHAKANEDMDEEIEEVDTQLDNTHLDPSTTVSIRSATEARAQWTHYESITRPLS
LSLTEQLRLILAPTLATKMRGDFRTGKRLNIKRIIPYIASSFKRDKIWMRRSIPSKRSYQ
IMLAVDDSKSMGESGSGSLAMETLVMISRSLAMLEVGEICVVGFGENVKVAHEFDVPFSS
EAGPVIFENFGFEQSRTDITRLIRESINLFRTARQKASSSPADLWQISLIISDGVCSSSE
HDNIRRLLREAEEERILMVFVIVDDVRTKKKGESVLDLKEAKFVNNEMTGRSEVKIERYL
DTFPFRYYVVVGDVGELPGVLAGVLRQWFGEVVGSG
>22fac021-3e35-476a-ae72-b7565f7072a3 (mRNA) 290 residues [BFAB_07:2169779-2172755 + strand] [peptide] name=Bfab07g05630.1
MEASPVQNSVTPKISRHGKSYVNCAKAKVKCVEKNGLASCERCHRLAKDCQPIIRTKRRK
PAKKTTATRTAQLEQKLDGLVSLLTAATQDQNTPHSSTVSNHSVSSDPRSDTQYFEYQTG
SNVGNPPVRGLAALDIKLSTNSSYSLNSIPVDPPLPGPASERPLRDTSGDYCATDIPTAT
PPVSLIPSGLELSPAEEENALHCFRTNSIKYLPFMVISSDTNVLEFKKENPFWWLAIVMA
TTKRTSKQIALGMHIRQLLGQKLLISGERNLDLLWGLLTYIACVITNRDQ
>4ec45247-b326-42b6-a013-f32b73f97b09 (mRNA) 536 residues [BFAB_07:2173195-2176087 + strand] [peptide] name=Bfab07g05640.1
MDKVNGKEDGKEEENHEYLSGYKIFVVITAITLMTFLALLDTTIVATAIPLITNHFHSLS
DVGWYGSAYLIANCSLQPLSGKLYTYFRSKYVFLSFFFLFEFGSLLCGTAVSSKMLIVGR
AVAGMGSAGLTNGAITILTHSVPIEKRPVYLGFMISTSQLALAVGPLIGGALTQYASWRW
CFYINLPCGFLVSLLLLSITIPERLHPAALTLTPLQRIQHLDLLGFSLFAPTAIQLLLAL
EWGGTPYPWSSSHIIGLFIGSFFNFLLFLYREYRAGDEAMVPLSLVRNTVVWTCCCTNFL
FMAGMLTLSYYLPIYFQGVRGLQPTMSGVYTLPGTLSQMLFAIISGFAVQKIGYYLPFSI
VGGCFAAIGYGLISTYTPSTPASKWIGYQIIGGIGRGLSMQMVIIAIQNNLTGTKIVIAQ
TLVIFFQYLGGALCLTFASTIFTAKLKSGLRTYAPTVNSQLVIEAGATAHGDVIPKDQVT
NVVTAYSLAINHCFYLAAGLAAGVMLFAWGMGWKKIGTKSDGKNVEAGQEGGGAEA
>918999f1-ba5f-45fb-af69-96dcb25aef7f (mRNA) 165 residues [BFAB_07:2176652-2177943 + strand] [peptide] name=Bfab07g05650.1
MFEARLERKERVKPQSLGVASDSKRSDDMVLDTSGLFPVKEPFFVTAKFWKRFSVYASVI
LSVASLVISSIASLKPTTAADMKALIVTSIIINALSVTLSALTSLDWQSQATTDRQFAQM
LSQISHVHDGKEGGRIVVLGREREREEEERMVRERGVSMGIGRAL
>34f3ca2f-6fb7-4fd4-9005-059063e12fa3 (mRNA) 675 residues [BFAB_07:2178277-2180479 - strand] [peptide] name=Bfab07g05660.1
MAKVPAVKRRKLTPPPTEGEDSTPSTLENAPNPNAFFKTASKWNLEQDYEMRPRKGKKEK
KESTRLPIKTKEGLVEQVEAPVEVNEEESDLEWIGADDVEEDEEPEEKVDKKPSVPIRQQ
ILEAKEELARIALMLNEDPEENVGAFRAIAEFGKSHNITIKKLALATQLAVYKDVIPGYR
IRPLSEDNMEEKVSKEVRKLRAYEQALVGGYQGYVKELGRLATSGKSHNTSDGGAGLSTV
AISCACALLEAVPHFNFRSDLLKILVGKLSTRKVDAEFVKCRETIETLFKNDDDGTSSLD
AVNILTRMMKGRGYRVDESVLNTFLHLRLLSEFSGKASTNHVDHEEDSFGGKKLKEKRVF
RTKKERKLMKERKAVEKEMVQADATVSHEDRERMQSETLKLVFVTYFRILKVRSPSLMGA
VLEGLARYAHLINQDFFGDLLEALKDLIGHAETGDDLEETEAEDEDSETSRNLTRESLLC
IITAFALLEGQDAHKAQASLSLDLSFFITHLYRTLHALSLNPDIELSSKSLHLPDPNAPS
TTDNKVNIQTTTVLLLRSLSSVLLPPLAARAVPPLRIAAFTKQLMTCSLQLPEKSATAMM
ALLGKVAKIHETKVKSLWNTEERKGDGMFDGCSTEVEGSNPMASTIWEGELLRLHYCPAV
RDGMKVVEKNVIGLR
>410a503e-2471-43d8-98b4-4345519c9bd4 (mRNA) 188 residues [BFAB_07:2180604-2181481 + strand] [peptide] name=Bfab07g05670.1
MRPLTEPETQTLFAKLAGYTGNSLKNLIAPLDNTPNADRYVFRVQQSRCYYVRLSLANLA
TSISRDKLLSLGICLGKFTKSGKFRIHITALPILAEHARYKVWVKANGEMPFLYGGHIVK
AHVGRWSEDCPEHQGVVVYSMNDTPLGFGVTARSTQEARRLDPTGIVCFRQADAGEYLRD
EDTLFATS
>862c7f9f-540c-498a-ab5e-9b60391c10a7 (mRNA) 689 residues [BFAB_07:2182039-2184791 - strand] [peptide] name=Bfab07g05680.1
MLIEDMASPEKKEPLYEFPYNPEDYDYHYYLDIPYGYDVETSTYNSALETAQDFTSSIYE
DTYEEKMERKDSLELEALNARSLYTTPESSPIGPSQMERQMSTKSTKSFKSTPGLFKMMS
IRNLKRSPPPEPPSKSIRDTYPEIFAMTSEESLAASSKPSRPFSEDTLASSLKLSRPTSE
EIKAPVEKKELAGPPGPPGPGGPGGPGGPPKEIFPEMDMENNLVGWSGQDDPSHPRNLPD
KKKWLMLASVSLITFLSPLSSSIVAPGITLMNKEFGTTSDILDTFVVSMFIFGFAAGPLV
LSPLSEIYGRQPILMYCNFLLTIWQLGCALAPNIHLLILFRFFAGLGGSACLAIGGGVVA
DLFPIQQRGKAQAMFVMGPLFGPVLGPVIGGFIAQRAGWRWVYWVLLIACACLSIFYVIV
GKETSAPVLIRRKTAALRKETGNESLISAYDAKKPAAALKLRAVLLTGIARPFRMMFSSP
ILPMLALWMSFIFGLIYLLLTSIAQVFEQKYGFSIEIASLAYLGLGLGFFLGMFTVAKTS
DPTIISLTKKNNGVYQPEFRLRNGLFFAFFIPGSFFWYGWSSYYGVHWIVPILGLIPFGF
GTMGVFAGIQTYYIDTGKQYAASAMAGLTAIRCLFAAFLPLAGRPLYNNLGLGWGNSVLG
FIGLSLIPAPFFIYKYGARLRERYPVRVD
>aa359c59-c995-41b9-95e1-bc90c6d90a60 (mRNA) 396 residues [BFAB_07:2185699-2188011 - strand] [peptide] name=Bfab07g05690.1
MINRDRTLDMDFVLGCRHDVFLQKSFPRSISFYPAYDCPDSAEIKCECGTSIYFHQRLNR
TTVRSPSQLTSEGFYGLDEVVASDCWHHFVTLFSSFKFRHSSDYLLAASGMASRFSGYFL
LPNSYIGQRYLAGLWMRNLPSDLCWWVKVIEGHCVPSRAEPYRAPTWSWASVDFDGESPC
SPVVYHSNFGKKFEQSKNFRIRRAETQLATSDVGKYTYGSVCGGLLRIKGILIAAQIFIH
PYLEADARHTIQFLEADAFDDDYYPCFWPNVYLDVQGSFKPITNEPSPAVNVLDLPIAGD
LEDKEALVSVDVVEDQVQEDFLCSSTKVWICLVGNIVNGGLCALILKERERANFRRFERV
GYLHNRVRAFGFQSYGWHNNFMRRVERAGETAVEIL
>dc622cbc-133f-4299-88e9-0d31ea5b50c3 (mRNA) 615 residues [BFAB_07:2189220-2192359 + strand] [peptide] name=Bfab07g05700.1
MLRPKPAKCLLCSFRAAQNPPIQKWPSRSMSMRSRLPSRPNRMSLAGAGKVSSSPTKEGP
TRRKQDGPFGGMNLREAKIRGVPERPSAAQERRSSRLDRGDKDDKKGRGFHALKMQRALS
PVSYTRRSDIKDRIKEVDSFEQFALLDSVKEAIYKQALPEIESHVPTPVQRIAVPALLGN
QQKKGKQSESEQYLIAAETGSGKTLSYLIPTINAVKVAEAKDAEIEAYEKELQEEKLRQN
NLTLVSPPLSNMPHPTTGRPRAIILVPTSELVTQVGTLVKAFGHTVKFKSAMISSNFSGK
VIRNRLFSPSGIDVLVSTPHLLSSIADSDPNILSRVTHLVIDEADSLLDRGFSPLTSAII
DRATPSLEQLVLCSATIPRSLDSFLRKRFPSINRLVTPNLHAIPRRVQLGVVDVERDPYR
NNKNLACADTIWTIGKAAAEHDGPVKGVMDVKRILVFVNEREKTQEVADYLKSKGIDAIA
LSRDTPEERQSEMLASFTSSARLSMPKPESHPGSLSDNQPNYVPFGKVAPPVKRQLPNTK
VLVTTDLGSRGIDTVAVRHVILYDVPHSTIDFIHRLGRTGRMGKRGRGIVLVGKGDRRDV
VKEVRDGMFEGKALI
>7d9ed764-99e0-4570-b997-b87af1fcc0a3 (mRNA) 749 residues [BFAB_07:2192749-2195943 + strand] [peptide] name=Bfab07g05710.1
MNDSVPYDTMGNPGHHSAGDSTGQATFGYSQPHIIDMFFPGFSLFATALKNYTAIDLNIY
IPMLVIMGILIFCWQYLETWFWIELDAYFMSTADVRMDDEMYNMVMAWISEQSFAQRSRH
FVASTNLNSRMWFMWNFNEDEENEEEEDDFEIDEDGSPVPKKASEKDKRVRFTPSFGTHY
FWYKRRLLQFRRLQTQSLNSSAMSEKEEISISSFGRNPRILKELLDECRQAFIKNDENKT
IIYRGGAKGGSFGEPGWTRLLSRTSRPFSTVVLDEVVKQNIIADMKDYLHPYTKRWYSNR
GIPYRRGYLLHGPPGTGKSSLSFAIAGYFKLKIYIVSLNSGSMNEETLSTLFAELPKQCV
VLLEDIDTAGFTHTRDNDEDEDSSEFDEEAGPASPLTKATKAMEAMANKNGDKDHSGKVS
LSALLNVIDGVASQEGRILIMTTNHIEKLDEALIRPGRVDMTVHFDLATKENMEQIFRSI
YATLEGDYPELKSSESGSSDGGSVKSGPARGRSPGSEVPVNKRGMHKKKPRSPSKERRIQ
AELDRIIAVEEEQRKLEDEERIAKLAKLFSEKVPEAKFSPAEIQGYLLKHKRNAENAVEG
AEKWVKEREEEKERAKLKESEEREKRDKEKAKLEKEIEKLKKEKEAEDGDGGEGDEDENK
GEGEGDSEKAMKEVETIKEQTEMVKKEVEALKDEVFNGMEKKMQKMEKAGIKLKDIEMAS
GKKATHKSDVEMVEFAETGSQTDPDEILV
>f868e293-307b-4dec-8983-77116fe19d25 (mRNA) 1538 residues [BFAB_07:2197007-2203467 + strand] [peptide] name=Bfab07g05720.2
MGGAEDMPQRSSSPLKRPASELEPDVPLSSQKEDVDMVMVPDTQEDSEVAIAAPTAIRAV
SMDMLRDESTKEDAAQSVTATENVQNIDPKTEIPPIDVQVATVTSLIRAARDGPLTEGDK
TYLVSRKWLEKVTSNTSEARAKSKKVVEEKIGPVDNSNIIQQIIPQPGREDFVQLKHGIG
EDLFELFPGDAWDMVLEWHDIMTGTKPIVRFAHNTNPDKGPNAIANVSYEYHPPIFHIHR
VWSELGDKVDAATKSANPDAPVVVASRSMRMHDFLKLIKEIAGVPIKQKIRLWRVPRTLP
AADPALSIANGAATPPSSRPGTPTVDTNATAPEVQDSWKKLLLGVADFTKVERDSGRMKI
EFEDSTVNENYNGNLNLGQLGLGDDQAIVIDELVEGKDGFVSNTRASPNGKANGVGRKNN
SSIIVSSQNNSGRNSPAPPSSYNLRSFNRKSKNGRTPGTVGLGNLGNTCYMNSALQCVRS
VEELTKYFVHDVYKAELNSDNPLGHGGCVAKAYADLLKEIYKEPAPVSVQPRNFKNTVSR
FATQFSGYGQQDSQEFIGFLLDGLQEDLSRVRKKPYIEKPDSTDEMIGNPEAIREMATKV
WDITKQRDDSVIADLFTGMYKSTLVCPHCDKVSITFDPFNNMTLQLPIESIWTRIVNFFP
LNDKPVSVVVETDKHASVGTLKRIISQKVGVPAERIFSCEVYEGKFYKWYLDHEVASEAI
EGAKDIANFYELETTPTNLPKDSGNKHTGFGKNNSTDNENLPWDSPEAEKLLVPVFHRRP
KRERFGKKPTSGSWELTLTPHFIVVNRNEARSEEAIKRKLLEKVSTFTTWPSINDEYDPS
SASESIDPDLVVTTGSDADSSGDGKFVAQSLDGEDELVDVAMKDSNPVHESTEQSPGAPL
KVFNSRRPKWIDPAEFLAPELQNLFEISYIVDAKGGIPTAWAVNLDSTRYPKISERNPQV
HQINEDDTSNDYDAIDSTAGSISSKSSRESSDDPNGLAPSITRMTEDLESDDDALKPISP
HRALPVRPAAPKSGARVGPKNKRRTRNMKTYSKKGKSVARKRQQSEAESEQDAPDDGPLI
RLGEGIVVDWNEDAWETLFGSYNDSDNFRGRATYENPPTLVDLALDSKRQARESRRKQGI
TLEDCLDEFGKEEILSEMDTWYCPRCKEHRRASKKFEIWRTPDILIMHLKRFSASGFQRN
KLVDHVDFPIEGLDLSSRVIESQDGKEEIYDLIAVDDHYGGMGGGHYTAFAKNFSDQKWY
EYNDSSVSETKNLNSMVTKNAYLLFYRRRSSEPLGGKALRDIVNSLDNASSDEEDSGEGR
RLGENSSQHGSPSALTGVGAALRRPELGSEDGGARTTVNLQALEHAPLDNDDTQGDELFY
DNPLYLPSYSDIQASTETDEAIDMSDQNNVAPNLHQQSWGFEAFNHNSPTFASGAASEAG
EAGSLYGSEGIEHGSNPDQATKDERELEFNNAMVDEDYQESYIPDTDVEGPNPLDVMAVS
NAVKQRNRAEQRNYEIPVDTPEDEEPATEIHVEEGEGV
>c1cd2608-c19d-42d2-a66e-214018495e10 (mRNA) 1520 residues [BFAB_07:2197007-2203467 + strand] [peptide] name=Bfab07g05720.1
MGGAEDMPQRSSSPLKRPASELEPDVPLSSQKEDVDMVMVPDTQEDSEVAIAAPTAIRAV
SMDMLRDESTKEDAAQSVTATENVQNIDPKTEIPPIDVQVATVTSLIRAARDGPLTEGDK
TYLVSRKWLEKVTSNTSEARAKSKKVVEEKIGPVDNSNIIQQIIPQPGREDFVQLKHGIG
EDLFELFPGDAWDMVLEWHDIMTGTKPIVRFAHNTNPDKGPNAIANVSYEYHPPIFHIHR
VWSELGDKVDAATKSANPDAPVVVASRSMRMHDFLKLIKEIAGVPIKQKIRLWRVPRTLP
AADPALSIANGAATPPSSRPGTPTVDTNATAPEVQDSWKKLLLGVADFTKVERDSGRMKI
EFEDSTVNENYNGNLNLGQLGLGDDQAIVIDELVEGKDGFVSNTRASPNGKANGVGRKNN
SSIIVSSQNNSGRNSPAPPSSYNLRSFNRKSKNGRTPGTVGLGNLGNTCYMNSALQCVRS
VEELTKYFVHDVYKAELNSDNPLGHGGCVAKAYADLLKEIYKEPAPVSVQPRNFKNTVSR
FATQFSGYGQQDSQEFIGFLLDGLQEDLSRVRKKPYIEKPDSTDEMIGNPEAIREMATKV
WDITKQRDDSVIADLFTGMYKSTLVCPHCDKVSITFDPFNNMTLQLPIESIWTRIVNFFP
LNDKPVSVVVETDKHASVGTLKRIISQKVGVPAERIFSCEVYEGKFYKWYLDHEVASEAI
EGAKDIANFYELETTPTNLPKDSGNKHTGFGKNNSTDNENLPWDSPEAEKLLVPVFHRRP
KRERFGKKPTSGSWELTLTPHFIVVNRNEARSEEAIKRKLLEKVSTFTTWPSINDEYDPS
SASESIDPDLVVTTGSDADSSGDGKFVAQSLDGEDELVDVAMKDSNPVHESTEQSPGAPL
KVFNSRRPKWIDPAEFLAPELQNLFEISYIVDAKGGIPTAWAVNLDSTRYPKISERNPQV
HQINEDDTSNDYDAIDSTAGSISSKSSRESSDDPNGLAPSITRMTEDLESDDDALKPISP
HRALPVRPAAPKSGARGKSVARKRQQSEAESEQDAPDDGPLIRLGEGIVVDWNEDAWETL
FGSYNDSDNFRGRATYENPPTLVDLALDSKRQARESRRKQGITLEDCLDEFGKEEILSEM
DTWYCPRCKEHRRASKKFEIWRTPDILIMHLKRFSASGFQRNKLVDHVDFPIEGLDLSSR
VIESQDGKEEIYDLIAVDDHYGGMGGGHYTAFAKNFSDQKWYEYNDSSVSETKNLNSMVT
KNAYLLFYRRRSSEPLGGKALRDIVNSLDNASSDEEDSGEGRRLGENSSQHGSPSALTGV
GAALRRPELGSEDGGARTTVNLQALEHAPLDNDDTQGDELFYDNPLYLPSYSDIQASTET
DEAIDMSDQNNVAPNLHQQSWGFEAFNHNSPTFASGAASEAGEAGSLYGSEGIEHGSNPD
QATKDERELEFNNAMVDEDYQESYIPDTDVEGPNPLDVMAVSNAVKQRNRAEQRNYEIPV
DTPEDEEPATEIHVEEGEGV
>906fcfba-9afd-45fd-807b-ce4a1b1f739d (mRNA) 153 residues [BFAB_07:2213789-2214746 - strand] [peptide] name=Bfab07g05740.1
MQFSTLLISAAALIPSALGCMNVSVVYTFGTDNAPSNLFISYLDNGGVTCYYNQRSPPTG
HQLAYPLVANAEGIKLNDTYTGCVYKYSSEIQLDLVEKGYKKSHNVINSYQYEVGVNSPK
TVEYTGLYLGDKTVSDGSGDKPEVWTWTTDFFC
>a081d1ea-9843-425e-81ee-4df0bac44f60 (mRNA) 313 residues [BFAB_07:2215741-2217187 - strand] [peptide] name=Bfab07g05750.1
MSTAPANKFLSKAYVDGIYIPSGLLIFGCFIVKKDWLPFAVALAAVLGGYKIWSSQETPV
LKPTVFQDFELKEKTVISHNVAIYRFSLPKPTSILGLPIGQHISISAVLPQPDGSNKEIV
RSYTPVSGDHQPGYFDLLIKSYPTGNISKHMASLTVGQTIKVRGPKGAMVYTPNMVRHFG
MIAGGTGITPMLQVIRAVIRGRAAGDKTEVDLIFANVNPEDILLKDDLDSLAAQDKGFRV
HYVLNNPPEKWDGGVGFVTPEMITKWLPKPAEDVKLLLCGPPPMISAMKKASEGLGFKKA
KPVSKLEDQVFAF
>60f819f1-bfc9-4efc-9515-8ac92f51038d (mRNA) 211 residues [BFAB_07:2217348-2218294 + strand] [peptide] name=Bfab07g05760.1
MGESIHQSGGNAGDKSDDSPFPLTDTDRWVLSQTDDEFHLHDWDELKEIITTNNLSILKR
KPSDLRRYMSWSTSIKAEYGSMMNYILQHRLPWGSPPFTYISSIPFENPSDYKILLNDWP
YGLSKDVTHFVVWSKTPIATDDQNGDVTDESRKIIQDFVKRTFADRLEGTDRVMWFKNWV
ALQSVRALEHIHVLIKDVQKDDIEFWTENRV
>fc9d4d8d-d1a0-4be8-9fa0-9798f41fbfa7 (mRNA) 161 residues [BFAB_07:2218331-2219117 - strand] [peptide] name=Bfab07g05770.1
MAQKAKKDRAKANIQALNYLHYGTFLANALFCLFHFLIRSRNMWAYVLFSLAPWVIEWFL
EQNSRPKFDQAGKMVSAGEDLAAPGLTEYMFDIIWMHWLSLLVVVIFGNWGWLIFSVVPI
YGLYKVFGLWSGAKGMMGGGQKAQAPEEQMPMAGNRRQRRQ
>0c8f533b-7c3f-4481-b17a-f2c187c6f622 (mRNA) 834 residues [BFAB_07:2219347-2223229 + strand] [peptide] name=Bfab07g05780.1
MPSSRKESINPCITNQLCQLIYYHIDNNLLKNALFFAERLHAYTPKGPESSYLLSLCYLR
LGDYASAFEVVKSPNTRSGHLGCAYIYAQACLALGRLKEGILALEKNRGCWGAQNSFGKH
TQYSRHPDPDASAVCCLLGKLYRAFDDKKQSIGYFEEALKLNPFMWDAFTNLCDMGTSVR
ASSTFRMSLEMEAILKSNTQDREGPIETLSVEEPRPSRPSARSYQSDPTDPFNNNSSSRS
FAGGLFGSLATSASSKLAESNPSLTNLPATGGISISSDTMETPTGPSAPLDYTTAPSRKD
TSMTSAFPINMEPPQAPVRRNRTLQGLGMDFSMDVPKMGRSMTSKRLQKAAAEISEDSSA
GHNSRHNSVTVPGGDRKRTVSGQVVPRQPSEDPGAPQRRSVRLINQFRPTSNKSSSNLAT
VGPAPGRELKKARPPISKMMRPAGSSTAGRQVSGNRKPVEDSMELDQREGEIRPRVSTKS
FGTRSSESDTGTREEALRWLLDLFKKFGTGYFLLARFQSHQALEAFSTLSTQQQDTPWVL
SQMGRAHYEQASYTEAESLYKRIRQIAPTRFEDMEIYSTVLWHLKKETDLAFLAHELVDS
SWQSPEAWCALGNSWSLMRDHEQALRCFKRATQLNPKFAYAFTLQGHEHVMNEEYDKALT
SYRHAMAVDRRHYNAYYGVGKVYEKMGNYDKAFIHFEAASKINPTNAVLLGLMGSVVDKK
GNKGLALSYFKKAIDLDPKSALTRFKKARCLMTMGRLEDALDELKILKDLAPDEAMVHFL
LGRLYKSMKQKGASVRHFTIALNLDPKASQQIKEAIESLEQGDDDDDDETSMMG
>ff5cfdd9-584b-4257-89a7-5089b606a27c (mRNA) 443 residues [BFAB_07:2223520-2225259 + strand] [peptide] name=Bfab07g05790.1
MCLTITLKYMTCGHEELYVRPCGPDSIRCNMMSTHTCNIRSKVCRTCWMLDDFRQAPGYR
SEQSMMENDVSRYQAWNLEAETQDLHAQLPTLPLPNLPNQYAHFFSTNTVAFDLLDQNAI
ELLDEIVHHHLDPAFQARIINGENIPLADRIQTLNIRQILLLNYALADASQSLHSDDWRI
AMGYRAIIDFHNSEHFTQLEDLQALVDECGICRTSFAHHNEGETNHAVVKTICNHIFHES
CLERWFVSSDRGDCPMCRRMIRGAELPEIPALLEADGPFPEWLTILNRCIRPVIPRPAVV
TRLDILRLELEVSEALELVETAREEFTAAERSVRAASDALQTREFVPREELRAFQDQLLD
HAADIEEQAFRDYQYTLRQHQRTRLIRENLLRDCLRMRERCDHVYGLAQSRYYTVARALR
MARDVVATQNVEEVEDARGEEGI
>2f0fd383-3576-4d07-a6a8-492412d2e819 (mRNA) 424 residues [BFAB_07:2226420-2227866 + strand] [peptide] name=Bfab07g05795.1
MCITINFVFSECGHKATFVRSCQEDFSRCGNMVTDPLVSTHADFCNDCFMLLDPRISIAR
EHQPENPSIDLMTELYQMRHIEDETMDLQVRLQDLPLPDDVQDPSYHSSIFRAMCLLPRD
SLDLLFIMVNQRLIPDFWLRVLNGESPSPLIRRSILHLRQILILNLALHRSRTTLSKNEW
YIAMGYELFYQVDSTSPDDDCGICRQPLNEIGEEGVPVRTQCSHAFHLKCLGEWIDVSPH
SDCPACREVILKTLEPIHDTPARGPHPEWLISLFPPVPQVTPNNPTLIAQEFAQLESDSE
NARLRVLEADQSLTALEAELQVSRIDLSGTENLSNEYIHTASEHIIRNLTGLSSAADFFR
YQSQVRLHRMSLARFDMSSQRLAERRREVERSNDHAQRRYRPTTLALVKAQVDFLIGIID
SSLE
>452aee4c-a1bb-403e-86fb-ceafe4aa2198 (mRNA) 743 residues [BFAB_07:2230788-2234152 - strand] [peptide] name=Bfab07g05800.1
MSNSEQRMLESRIQNGSLEAVSGLMSDRAGHSTTTLMNDVKATQNSNISVPLPLQSNQIP
AFTAIFKSNTIAPSPPHSRSTSTNDAYTPLALDTTSRLHPNIDSSYSQTPSPLSAGLRIQ
TDIVPGCTIPSASTGTGIGERESPDTTRTQSRSGAQIGMSLARTPSVKNVLASSMGSNGS
APNSALSSPMLNAMADVTPLPSPLMSGDSPGPWKRLNSRRTSREQMLPIHSDSALITSNG
ESVSSAMANQQKRRAYHGLITNAAESGLTDAQINRKKNVEGHTRNRSMSEYVPEASQAPK
TRNITVSGSHAPMMDGAVDTPQSDMHMRREPHLAVQRGLAPIPRPPTPPSSRTGGESSDS
DSSLTTNPIPRALRRSRYEYFDAYTRNDSKRRRWRGIKVLGQGTFSKVILATSQVQDDAG
RIDEDNVFGIESIATPVETKGDRKQLVAIKICEHGPKGGASEERVEMSLKRELEIMKSIH
HPSLVHLKAWSIEETRAILVLSYCPGGDLFEVASQHRDILVPSLLRRMFAELIGAVQYLH
DRRIVHRDIKLENVLVNLPQHELAKSQDWTKYPYSIITLTDLGLSRRVADDEKLTTRCGS
DDYAAPEVIMGQPYDGRATDAWSLGVLLYALLESRLPFDPNPGMPEGHKQRSRTSHRIAR
VEWRWIEYFGEEGDHESDPDKFKEKGLLGAMEITEGLLKRARSRWTLEKVQENEWIKGGV
DVEGGVKWREEVIPEEVRGGGDF
>35387259-d576-46c8-8b9e-0344b4272c5f (mRNA) 325 residues [BFAB_07:2237162-2239172 + strand] [peptide] name=Bfab07g05810.1
MSKKGDFAAVRKDIVGLLHQPEYDDGSAGPVLVRLAWHSAGTYDSETDTGGSNGAGMRYE
SEGGDPANAGLQHARVFLEPVKAKHPWITYADLWTLAGVVAIKEMGGPDIPWQGGRTDYV
DDSKLPPRGRLPDAAQGSDHLRWIFYRMGFNDQEIVALSGAHNLGRCHSDRSGFEGAWVN
NPTRFSNQYYRLLLSLQWRKKKLPNGIEQFVNYDEDTETELMMLPTDLALTQDKEFKRWV
GKYADDKEKFFEDFSKVFSKLIELGIRRDSEGNITNLDNEKGGYHSAPKKKDTPGSPAKN
TDDKKVNVSEAAPLQEENKKFNSKL
>1fa81449-57a8-471b-8fa0-8ad16cf5f1cf (mRNA) 566 residues [BFAB_07:2239217-2241674 + strand] [peptide] name=Bfab07g05820.1
MRTFFSRSPDLEGGQNRSYKKGFTGDHRGRSHIPPNPSPLFTPQSQHSPFSLPSTSYRHD
TIFRAPPSPSPKSVTFSEPSWSAVPGPGNVSGHGPAAASASASARVGEKGYWDLDDEQIL
RLREVLGGVPERESPRMQRARRGFSWSDPDERAFCTSPVPLSPHSRLKKNLKQKVAEQQF
RRRNQSGSAAQSQDGLLGDAERVEYQARVFREVLGMALGVRGEEGKRGREMDADAEGEGE
GKRPVVQRRGASEGVREGGFMGKVEREREREREREEDVGPRDLSEFLEKYDPRPEDLPDV
YPMGEHRAMLRTMYMEDILHSTAKLHMHNWILMSRNEEYDNLRIPARWDQIQEDLEKYTR
SIRNYEYWLTSLIPRLELPKTSLPPRFHLYGKQLAILECARAWNRPCEEPLVAELERKLV
AYQTDWSVSNGVWRGVRRETRKRGWGDGRGWGSSVGRGLGGVVGGGSILAPISILLLWPG
GISKTGGVGIIGVSVAILGIILVWIMDGGGPKKNGWEGIEGERERDGRGRGGIRGGGHGE
WGIKDVMVVLGAYAGVLAVFLGVAVV
>6fae1ace-0695-4e63-97b2-b51bec77543b (mRNA) 682 residues [BFAB_07:2241904-2246660 - strand] [peptide] name=Bfab07g05830.1
MALLGKAIAFGTGPPLWANDSLDFPWWQISLGWLALVSRPGRVIMSAVAVRLITAGMSPG
QYRRGGSIHLRLWAAERLVTLNHINSIAGTHWCRRYARLLGFQVGRDVQLHSLPPVTGLA
TFGATCAIEPEVDLAGWWLDGDVLHVGLISIGEGARVGARTTIMPNTVIKPFANIQPGLC
VSGTVYKSSPQGGAFDLESKYPVGSGESFWTQLRYKLSLFLLETIPVIAAAPAVTVGSLI
VRSATENHPNVIVEIFVTAWPVTLVGMLCYASIIVALVRLASRYLQPGLHSWHSTAAWAA
WLTHCFMWEARIVLFPLYASILTPTWLSLLGADVGGHTEASTVLTPPSLLHVGDESFIAD
DVLIAPYELCAGYLRLGTSSIGTRAFVGNSAIVKLEHAVQNGGLIGVLGTAPAPTQMDPG
SSWLGRPTFPLPRKAEELLDQSRTFNPTLQLKIARSLVGIWRLLSLVCSLILARFAILGM
TTTSDILGFRWAVAASGVLLMIAGVVACALASAARWILTPKIKPEEKHPLWSSFVWRNEL
ADTFVESLAVPWLAKMCYGTPMLLVWLRTLGASIGTGVWCETHKLSEAELVHIGDGATIN
RGSVLQTHLFHDRLMRLDIVDLQPGATLGPYSVSLPGTVVGSVTTIGPSSLVMRGERIPP
ATRWLGNPIRPWVQDDIVRGKT
>8794d033-b40b-4425-b2e2-a4695b610577 (mRNA) 504 residues [BFAB_07:2247196-2249930 - strand] [peptide] name=Bfab07g05840.1
MAVPIEKLGLENLLQERVYVKWVDEGHTYTLGSCLADNKENINFLMKVVCDSEKRIHVYF
SLKATHKHTGKNRSMEMLLVVPPHGNFDCYLKSLPISELDDLSSHDASALHEAGISNLEH
IIVLPFDLQFEGFVVRKERESATILPSNSASSTLMQKLKSLSVTKSFKVYIRPSDYARAN
LRTVDERLRDKGVWICEPDMRKIYSRQGIMLVDWAQIKHRELKGRLLPPPPQPPPYTKHD
AQRSTEVQVPRSPPVADAYSNKDIVPATPSLLPVCHGIFSPDCGEPSDVAEDLDLDDIRK
DSGHVEPYLERDSDEEYLAALHAQQCSQQIRQETSSEALRLELKEWLKAAMSINENVYEH
SGLTKKLFALGDSVHASNVGMFDAIRPWCSALFLCDPTDSSKLTDEWFVSDMAGLIKWVN
TFHRGAEMTILIDDFLKLGNAARLCNKNQYKLQKTDFLLRIWVEFDCSNISINGESRKVL
SRKRNILGTSSDVSNKKTRNSTNS
>74e1b743-2b45-477f-9445-6dc0b2539c4b (mRNA) 258 residues [BFAB_07:2250735-2252073 - strand] [peptide] name=Bfab07g05850.1
MLLQRLFLLGFAAGTSAIPARHVLSDRDNGICSAENMKVDVSDYNCPKKNTLDSKGYCSK
PIPNVPGKEGCSAYCEIRLTLKYGQEMPMSGASCGSGTECSISTTQTISYINTFSINAGI
GGAVAKVLESAFDIGATYTFSKTLTYSDTVGSKKDLGENECGYWTFIPYVLESCGTLTEA
AEKSAPAGYMNSATYQYCDKPSYTNTPNWCNTTPYKNAAGMADGKLYFVYTYCNGTGVDW
EKMQDSPYVYPGVSTAQK
>b2d96505-beb1-4f21-b608-9cb6ead4a104 (mRNA) 138 residues [BFAB_07:2252738-2253776 + strand] [peptide] name=Bfab07g05860.1
MSNDSHCINDNGGVSSTLGNQSACFWPSVSTDPNSTQFGNVSLSALKACCGTSDLIDYPL
NDQYNCTIQYCHFPPPNGDDTIMQCLQDVFDSGNSSHRVDLLCTGIDKIESMGPIVRRGT
INTILLATAVIAFGSWAL
>e4c0b607-d6fd-4250-9526-49ab831d3e19 (mRNA) 676 residues [BFAB_07:2253830-2256172 + strand] [peptide] name=Bfab07g05870.1
MEVLPNYSYTPLDTFKPSIRLLRLQRNEQGSISGLLEGFPLDDPERPVFRTLSYVWGPKV
FPHNILINGCSFPILSSLQPFLEIICDNEKLKQSWWWIDSICIDQNVGLIAEVERNTQVA
MMRWIYEESERSFGWLGPGDDEGEQAIRFLKMLANQKKRLDLLHQRRLGGDKKAKDEELG
NELSDRKKWAALEKLLLRPWWTRVWTLQEYLVPRKFVFQCGHETIDRRKSTKAMSTIGTC
RRIDETLLAHKAFEAPWIRRRVFHWYQRGAPTQLIGLMGYISDYKATDPRDRIYSVLGLA
ADGFLADPPRYQDSFETVYSNLVKSFVEKYKSLDILCFVDRFHCLEYLNGQLILPSWVPD
WRADVQPWMVPAIAAQSGAGHIGNLRPIMFWHPKGNNYDVFMAGKSNLPLKYNFSTDLRI
LTCQGVFVDHVDGIGGLKVVYTDEDKTSDEIAEVYQSIESTSIHGTTKASQSNAELLTQA
ELDPKQASRYMDHIFRCLMLNRQDRYLSQDISAREFSYLEFQAFCFAAMKRPGDVHPLFL
DWFERNRTLRIGSHSLEQICRATPFPESESFAGFDFMDISTNEQGFISRFRDTTKWMARR
LMTTDQGFIGMIPCRARKSDQVWILLGCSIPLILRKWEDKKGYQVIGECYLHGCMSGEIQ
KEVISGIRIIEDVCLL
>b54d5c8a-af9a-4aaa-9338-51b6e519da6a (mRNA) 393 residues [BFAB_07:2260967-2263468 + strand] [peptide] name=Bfab07g05880.1
MQIPLPDNTQPNVYNITIYLTISYNMYHSNHDALPIHQPSDGRTISYGREPLPYHDIGDD
RAQMPNFNPPRLPPISSLLSSLPPEQVEEGQTFEESYRPPSQGPQSPVALNRPMYLHQQQ
RSPRELERTFKHSQSPLSPYSTCPPTPMSDAFATSEGSVAAHHHGPFAPPRAPPPLLPQP
ECRLVVMQQPISARACGYGDKDRRMIDPPPILTLEVFDKDTGQAVNPKERKNVLSKYMPI
VHCTLWNPYTNCEDDKIEGSSDRRNQRRMVGTMVCNGFKALDIHGDERFFFTFADLSVRF
PGDYQLKFRLTLIDPAAMGKGQRNGIMSPLLSNIFKVHNAKDFEGMRPSSDLAKSLVSQG
YPNILKIKKGNAKTIAMVGQGDDEDDDDDMGGM
>50e9bfd7-fc0c-4fbe-b267-a1fde581de2f (mRNA) 584 residues [BFAB_07:2263972-2266272 + strand] [peptide] name=Bfab07g05890.1
MKYVLVSGGVISGIGKGVIASSTGLLLKTIGLKVTSIKIDPYMNVDAGTMNPLEHGEVFV
LDDGGEVDLDLGNYERYLNITLTRENNITTGKVYQHVIERERRGDYLGKTVQVVPHLTDA
IQDWIERVARIPVDDTKETPDVCIIELGGTVGDIESAPFIEAMRQLKRRAGKGNFLQIHV
SLVPVIQGEQKTKPTQQAIRDVGRAGLVPDLIACRCDVPLEKSTIEKIAMFCQVEGEQVV
GVHNVKSTYHVPLLLEQQGLISTLNKILNLDEISMTKAAVEKGQRTWTEWKSLTSQQERS
FDDVSIVLVGKYTKLHDSYLSVIKSLEHSAMRCGKKLKLIWVEAEHLEDDAKPTEFHKAW
HEVCTADGILVPGGFGDRGTEGMIAAAKWARTNKTPYLGICLGMQIAVIEFARNVCGITS
ANSVELNANATDKVIIYMPEIDKVNLGGTMRLGLRPTEFQPGSEWSRLRKLYGDKTEVHE
RHRHRYEVNPEYVDRLHDGGLEFVGKDDKGERMEIVEIKDHPWYVGVQFHPEYLSRVLAP
SKSYLGFVAAAAGCLEKITEDCLKAELDNSVNGDLTNGINGVTI
>f27bc62d-a87b-48da-b934-33c221ccdbd0 (mRNA) 887 residues [BFAB_07:2266510-2269746 - strand] [peptide] name=Bfab07g05900.1
MSLLLPGETYDEAEVRLGFRLDQVPPKINRGLAKEMSARAKAWLASEPLWTPESQMGMSP
EWTGIKIIGEGGNGTAGRWRLTYRNPPEGTPGRMPFESIVVKQQAQGWAGGDMRNEAEIY
ELLRHTNSQHLVKMFRRIYEDQGLNTIYADRSGPVTRIYLEDCAGGDLQGRIFDRFKDKY
IFDENEIWDAFHCIARGLYAMHFGHESLQEERWDRDEIVHFDFKAQNVFMGAGPRDDEHR
GSLVMKIGDYGHSSEVPNEQDLIYNFEHRKYGTARYKLPEQLRTRKHPLERPWMDRMPKT
MREAGDGNVLNNLRYGTHSNIWQLGIIIWQMIHTTEWCQDGNPSLPYLYDPDVEWEGSGR
HPEPGYPGRFALKLYKVANTWLGVNEEAGGVHTLATQDDMDYFNGVYDALPSEPETDIDP
DQPEEEKAMAKKKREIENEARAKARKNHTYSDTLHKCVMDCLIVQGEARIHVEDLYRKTQ
QVKKLYQDLIEPLLPAPYSPEPNLGELPAPWNDTTLIPGEGLGQPIREDEESHPLYLFDL
FYATEEHEKVQEIIKWARENPIVNISDYEDVHARELIRRNQVSYNIYMTETRRARGQRTK
PQYKVPAPFPEDWPHGVLQDNSKRRNPMTGPSKKPHGGLTVMNPDTRTPFSAIGEGDEGP
THPKNSPNKPKRFSYEGDSTPSYLRNFESTPEHMKPLSRRETPEYMRAPTIAAGFVGRDF
GGFESIKITRASGEGQSKPRSGDRSMASIDIGGGIIIGGGGRKKPSEKVVDWPEFPIGLQ
KDVDKPFLLRALAIPELKDSILFCTVIEFKGKEEIVKGIVYLTGLLTTTTVHQMKEMLTE
KETGIPVDQMKLTGYDQLSVLREFEDEEERAAILELEIYVRDVRMTD
>de81b502-e92d-4c82-ba53-14140cf931b6 (mRNA) 498 residues [BFAB_07:2270301-2272475 - strand] [peptide] name=Bfab07g05910.1
MGKFFNISLAVFASTGSFLFGYDAGVMTDVIASQNFLTFFNTTQDSSIIGAINSTFNGGA
VFGALQGGLTMDRYGRKITIFMGALICLVGAVLQTAAQNLAMILVGRIFTGWAVGLLSMA
VPVYNAECADPKIRGLIVGLSQQMIGVGFIVSTWVGYGCGVTKDSPIQWRVPLAVQMIPC
LILASGILFFPESPRHLMETDREDQALAILRKLHFNGSNDEFIVKEFNEIKETIAAEKAI
TVPGWRVMFTVPQWRTRLGHGVAVQAFTQFTGINVIGYYQNTMYKALGITGNRALLVSGI
YNCMGPLGNLVFITFMIDRVGRRKPLLWGTIGITIALVCQSIINSRIDPENAQRGLSIGG
VFFIFCVTVIFSFSWGPISWVYMSEVMPMQIRARGNAFATGIGNWLVATFWAQVSPQALK
ALTWKFYFLFAAWNVVVTIPIVFFFFKETKQLSLEEIDLLFGDRALGTLPDDISKGIEHN
GAVETEHHEMHDKGADQV
>7be630f1-2134-4ed7-bc46-7e19fb82237a (mRNA) 1001 residues [BFAB_07:2273469-2277371 - strand] [peptide] name=Bfab07g05920.1
MSWDLLKRFIESDVFNQNPFLSVAYLSRYADHVGIHYVLCSKLRQFSYEEIEFFLPQLCH
LIISVDNESVALEEFILDLCEESVNAALLTFWLFQTYLHDLSANPQSEAFKTCRRIYNKV
QHIVFGVSETPTKKISENVLPVTVLASFVLASIAVPFLPKWAGPLAISQARKPQSTGNVV
ADTSQMQTQKIVRSHTTTPGSTRTKQRREAARIASAPGSGGLDSAGPSEAPPDLARSNSL
TRPTSSNSSRKVPLEQIRPSRLDLKALEPRNQSSASLPELRNPNLPSRPATPVTAGLPTR
LTEPINKRYSQHSHGGKLLTPASLTDKQKVKLLRQNYFRSETQFLTALEDISNRLVIVPK
PARLSALRAELALIAQDLPAEVDIPVICPATLVDGIPSKSKHHRIVRLNPAEATVLNSAE
KVPYLLMVEVLRDDFSFNPETLDNERLLSRLVSEEGTHKRRRFDLSESGRSYGSHIIKST
DNTPDSVFEPISGDLGSSPLIKEIDHDEEDVHTPTYKENATTSRPTRKSSGATTLSSLSG
VATPRTSGTSTSRSISPTPRRKMTIPGVGRSGEKDQPDFSTLTTHIRTATQMLTQLNSTS
GKRPKHEVDAIRHKIIASIQSLEEQNYDSEDNMQSQTFDMIMEKANAAAANVAPEDIEEV
SPTDADAVINVGAGAARMENDQKTGGVQRKGDRDDPSAATFGEAWNVKKERIRKSSPYGW
MKNWDVLSVIVKTGADLRQEAFACQLIQCCDNIWQDAGTPVWVKRMRILVTGESSGLIET
ITNGVSLHSLKRSLTLATIEAGQNPRRRIATLRDHFVKTFGPPDSDAYKAAEDSFKRSLA
AYSIISYILQLKDRHNGNVLIDNEGHIIHIDFGFMLSNSPGSVGFEAAPFKLTQDYVDVL
GGVGSPAFDDYKKLCKQAFQALRRSADNLIDLVSMMGRESKMPCFSYGVAQATNSLRQRF
QLQMSADEAETFVETDLIGKSLGSYYTRLYDTFQYRTQGIY
>49f1f27e-5949-40c8-8885-f9165a450197 (mRNA) 714 residues [BFAB_07:2278489-2280954 - strand] [peptide] name=Bfab07g05930.1
MASSSSRTLSRSVVLLFMFLLLSATQTMARENFDARDALIALEEEWENFGEPDMGLSDSS
YMSSPEPFKPQPPESYRDFQIELSVPEDTRFFDRLLQFFNQPSSTEYRKAVQTFEITGWN
DEYTESVIWPGITNLLLNLPNLSVLDWKISQPIPPEILSNLSVTNPGIRIHLHKLPRMRY
SNLWYYKEVSENSTAVANRLQDDVRSIIGSPLLYSINVDIENSYPTDPASMRILFEILRS
NPPNLRELQLRLSHFGCVVDNEIKAFPFLSSEFNTDRENMTSIQFPPLEKLVVHGYDFEE
SPDGGSGWYRNIETPKVDWRTLLKFPWNKLPMWLIDQIGKYRLSGVNAIRYIPIERLPSF
DGVSNLDVWLKVMDWSRLKTLHMIEPSPVAVQKLGIAGVLTGLKELKIHGMRYPWKYDVK
SEWVTVVDFLDDITSNGTSLTSLSIREISFPKMITCNDSTTEYKATEKLPDALLRHTNLT
KLHMYDGIPFFSWGSDSQLPKQISTLVSVLNSSSIEDLAIDIPSLPGSNYSKSENGNWKT
DGIDPKISHEEMYKAFTPLARQPQLKSVEFHVPAPECWWHQVKRVKRQGMYTRSGEAEII
EVDDRKFQDQADMLEVERCEREEEELGKRTRRLFEWMNGEREKIGENVIERLRVVAGREF
LRGKEGVGVEMLGRTSFGWRWRGESGVWSCWTGEEEEATKCEGGRRWREDDIWG
>b7aa78f8-f5dc-4957-af6a-dd2441eff625 (mRNA) 516 residues [BFAB_07:2286748-2289300 + strand] [peptide] name=Bfab07g05950.1
MEKEAAHAHSPEVASVQDNVDFRTNTPTTAVDQHGWKHKHRQFLGMTYWYASPRVQLTMV
AFVCFLCPGMFNALGGLGGGGRSDTTLADNMNTALYSTFAVFAFFGGTFVNKLGIKVCLA
FGGIGYCIYAISLLASVHAHVDGFNIFAGALLGICAGLLWTAQGTIMVSYPYEGDKGKYF
GVFWAVFNFGAVLGALIPLGQNINVKTNSTVTDGTYIAFIILMFAGAVLALFLCNADDIV
RPDGTKVVLMKHPSWKSEFIGLYDTIVQEPFIILLFPMFWASNWFYTYQQNGINAAVFNT
RTRALNNVLYWTAQIFGAIIFGFGLDAGNFRRSVRAKSALALLFSITMITWGGGYAFEKT
YTRESVSSGDYVPVDWTDGGKKYIGPMFLYIFYGFFDSAWQGSVYWFMGALSNSGRKSAN
YVGFYKGIQSAGGAVMWALDAKKTSYHDEFMSNWILLSVSCVIAAPVIFLRIKDTVTVAE
DLQGTDETLADVVPEGHEEKLGGGHELNTHARSDHV
>e039a6e7-2ed9-44bd-b525-44251ca5868c (mRNA) 308 residues [BFAB_07:2292877-2295065 + strand] [peptide] name=Bfab07g05960.1
MASPPSPPYDNTEDPLASQKMMHGNSMPEPSESPKSQLHDAIERIQSLHKRRAQIKTIYE
NERQYLDQRSQKTKSSFEGLIVSTEEQIQSINEFPAFDSHPDYTEVNGKLHSVALDTKAL
FQNVNALSESIIMALDAWYQKEVDKCAYEIKLAEKDYKRSFDTWQDLIKSGDLFGASEPF
KAPAPTNPGPSSSRSSHQLQDGPDPHMYAAPPVPNPNNSIPHKSDTITSQHNIRPQSSRN
ASIDMGANMSGAMMNGSMNGRGNGNGNANASMNGDMNYPPNSSEKRSGGKKKTFSWLSGG
SGNGKYIE
>60d5f8ad-951e-4b9e-8f2d-a3d6b99ab8a8 (mRNA) 374 residues [BFAB_07:2296466-2297820 - strand] [peptide] name=Bfab07g05970.1
MVNHIWSIPEVEFLKSISKSRSSGEIKGSTLLSIFLTEQARHRPGGDLHSSECWPHRLIQ
RGPLRLKYRECCNGADEMTTANARGMRRQSRIQTPTQEQLQQQVREQREAPVQVPLQAPQ
TQQVLFQVPLQAPQTQQVLFQVPLQAPQTQQVPFQVPMQGPVNQASRLSPPPGTILLPAG
NIRVSGGSIRIPPNSLLLPDKQILLPNGRILIKTPQASPPHRTPQPENRSQPRAAALTLA
PAHFQTLRRSPDLRLALPRIRQVVGRELQGRAHLNATTIARGQVTRHRQRSTAPELSPQL
TLLGRTRRQPIIIADDEDSSPAGAEIPVSDSRNDTPAFAREFRNLAVDGSEKEDSSPASP
VVSVDLMALVSILN
>a4ace7cc-82d7-4f8e-bf02-4b1a10686b19 (mRNA) 424 residues [BFAB_07:2299449-2301031 + strand] [peptide] name=Bfab07g05990.1
MPSNNRPSRNRKMPERLNSPSVQIETSTHSQTVATVPSTPPPSTPTRASSSSPSSAASTP
TPLIRSGGIQWRKNLRATLPAATEVQDLSAQHRQESEASVVEAQANSIPESRREVGEIPV
RKPEDEYDVDSPYFGLEHTPEWDDLGIDIDDQSQGRWYPPGLMAPRAYNSLSPAARIMLF
HEVTKKMSFKNLVAYLNVTDDQLDNFVELYNSEIMRYIKEEELERSVEARMSEIRRRENR
LVTAEEFDLMLYEEVGSKLPPTVLDSPISLLEIGKAIAFLQTCYGSQIPGNHLNNGLRLN
NVVLSLSELNEIIEEMGKYHWLGESHNYDFNHDLGLAEYIDEINRVNSVQESVSSAQEAE
KPAKQPIGRPKKRGKQFGNKPLRNKAELLKMILSSKIQQMDSGEDEAAKNAEGGAVDKGK
RKML
>09872c15-b934-4b12-94fd-c0728df1afb6 (mRNA) 362 residues [BFAB_07:2305048-2306342 - strand] [peptide] name=Bfab07g06000.1
MYFSPRNLLISTSLLSSAFSATIRHAPRSDLPSRVIHQFPNPTWLENIVITSSDKILVTD
ITNTYLYYIDPTISSSAPDSNDTATLVHSFTPELSLLGITEVAPSHFYLITRNFTLSSVA
STLTGVNTIYSVDLTFYTPSTNSGASVSKVAIISGAGSLNGLTTLSESQNLIIAADPILG
VIWSINVLTSEYSVLLDLAELKPPVSTSLAFGVNGIKVLTPTTGDTDQVYIYYTNTGLTT
FGRIPFSLSTLNVTGPVEILTDAYGADDFALDPDQGVAYLAYGTGASVLKIGLESGDVSV
VIGGESDTTGTANETVLSGPTSVQLGRAGDGLGWAYVSQSGKNEGVYTEGGKVLAIDVTG
SS
>26ff84b1-c8d2-4cc9-9409-93a2557151e7 (mRNA) 328 residues [BFAB_07:2307038-2308803 - strand] [peptide] name=Bfab07g06010.1
MAPPSALFTGETSPVDGVQLKSAFDVKVGSSQVATQGKTLADLAEKWDQGFTFAPIRESQ
VSRAMTRRYFNDLDTYAESDIVIVGAGSCGLSTAYMLGKARPDLKIAVIEASVSPGGGAW
LGGQLFSAMVMRKPADAFLTDLGVPFEDEGDFVVVKHAALFTSTLLSKVLAFPNIKLFNA
TAVEDLITRQTPDGSIRIAGVVTNWTLVTMHHDDQSCMDPNTINAPIVISTTGHDGPFGA
FCVKRLVSMNQIEKLGGMRGLDMNVAEDAIVKRTREIVPGLIVGGMELSEVDGANRMGPT
FGAMALSGVKAAEEALRVFDERKAQNAY
>c74bb6fc-1542-4071-aa7e-75edf09e9a66 (mRNA) 281 residues [BFAB_07:2309875-2310926 + strand] [peptide] name=Bfab07g06020.1
MATEKVTRPPKPIVVPIKASGALGKYDISFSQHDFVVELSKAPWLGAYIDLVPRVNGRYF
VEGYGCYYDPDESVPYFFVAAQGTICGYFYCIEMLPIELSHYYKLCQTLQVVSAKGLSSN
PESLQELWDTIAFLDKPETSEDDKKSRSKVGTPAFKFVYLMIMGDFDLDSEALEAKQEQA
LMFVKTILSNKDYIKWETRMVVRAAYQVRFETTWEVFKMLDDFGGQFASKEEDFEAKEAV
REEAAKKEAAKKKAAQEKVAKEEAERKRAKKQRASIQQHKK
>3a0b5789-cbc1-4b12-a266-e7d7b7039822 (mRNA) 413 residues [BFAB_07:2311133-2312693 + strand] [peptide] name=Bfab07g06030.1
MTDIHPFNISVPQDKINTLQTKLSLATFPDELPCESASAWDQGPPLSEIQRLTEKWKTWN
WRNVENSLNEYPQFTTKIDVEGFGELDIHFLHQESPVKNAVPLLFVHGWPGSFLEVLKIR
PHLQSPAASTSSPHPSFHIVAPSLPNFGFSSGVKKRGFAMAQYAETLNKLMIKLGYSEYV
TQAGDWGFWITRAIGKLYPKHCKASHLNMVYAQPPKLFSNPIEKIGDMFMPYSELEKRAV
ERRKWFQAESRGYNVLQSTKPQTLAYGLADSPVALLGWIYEKLHDWSDEYPWSDDEILTW
VSVYYFSTAGPGTPQRIYYETMHTSEDKECTVDKLQQWTADVKLGLAYNPKDLENVPKRW
GRTLGNVVYEVENDSGGHFYSHEKPDLLVRDLRAMFGKGGKAFSIVQGRDGYE
>dd7ae50e-4a37-4555-b648-7620c8178f13 (mRNA) 371 residues [BFAB_07:2312942-2314388 - strand] [peptide] name=Bfab07g06040.1
MKLANSQDLSPLFLSESSIDYLSDEDFLYQSSAHQLFPAPENNISTFPQFKLLPPELRTM
VFGKAVPDRNSQVADFFFQVCRDRTKFLVSIYDEISPASHLLPLLNACKLSRTVVYDQLK
NITLSTPEPHGTMKKTTDGIPIRYFWVDGRRPIQTYIDPVRDTLMLNIPDLMLLEKLGRS
IDLSNVERIAITSFPTDFNRSARHRLDDFTVLLLFISTRCPDLKNFQIVSMFPVHTFPGL
YRLENMRGYHVIDTDPEMWHGDYWDDDGRMRYHINSIRNVLEDAKVKETEYVRSLENMED
RDNFEYWKKVKLTTALLCKLDTDSNWEILGKKAPEPRLYCFSFQAWILAHEDGSPLNKYK
GLAQIFEGAPW
>8109734b-35c9-498a-9c0d-39ed52d31fc8 (mRNA) 267 residues [BFAB_07:2317311-2318380 - strand] [peptide] name=Bfab07g06060.1
MYMDKRTAQYSYFYHFQVEFLYSLYQTHTFIKSTRNTIMSSPGPLFIVGTGPMIGSHIPR
LFATHTFTHIALFARSESTLSASRDFIAAAAPSAKIHTYSADVIDTSGLTSALQTAVKEV
GSPEVVVYNAARVSYGNFGEYSEADIVEDFKIPNLGLYTTAKVLLPGLQALAKEKPESHP
SLFVTSSPIIYQPFAPVFSLSMAKAAQANLVKLLIEQTKDEVHVALVTIGGPVSEQEPVN
NPKHIATKFWELWEQKKGSRDVELLVQ
>3e5dffe2-a629-4e5a-811e-e0e7f268aff2 (mRNA) 428 residues [BFAB_07:2319309-2320931 - strand] [peptide] name=Bfab07g06070.1
MPIDFQLSASEDGIRKHAAAFAAGPLKDIKKVYSAKKDEEQFQSLKPFYAGATAGGMIKG
LIGPHIGGVGGSLTESTILVEEMYAVDPSASLTIFATGLGLTPLNLAGKEEHKEFLEPFL
NGEGAPLASLVFSEPGGVANFLEKGAPGLNTTATLEGDEWVLNGEKMWATNCAGWDFEGA
DLQCVVCRDPSVTSDEPADAIMILLVSRADIERNEKGAFKTLKHVATAGHPACSGPHIKY
TNLRVPTKNVLCPPGQGVPVVSGSFDCSAVLVGAMSVSVMRAAFEAALAFAKADNRRGAE
DLLSRQAFADILSGIKMKAEASRALTWKAAYTLENGPGDYNARRELALAAKIYCSEESVK
AVTEAINAVGITAYSAEQPFGDLLNTAIVLPIFDGGNVGIRRRHMQELMAAESYDPWASS
FGPSKAPN
>0d45a632-d336-4b97-aeb1-ac7bbddafce5 (mRNA) 384 residues [BFAB_07:2321433-2323550 + strand] [peptide] name=Bfab07g06080.1
MSATDPNIPHDSKVNQILGICSAMLVITTIVVAARIWTRLKLAQGGLGADDWYIIVAWVL
AVAYDLDPINQVTFGLGQHIYDLPESTNFSASLELYYFGEIIYFVCVGVTKVAILILYLR
LATSKVFRTLVWGVMAFVILTSFSFVIATIFQCTPISKAWEQPVTSKGHCIQVNAMFYAN
AGLDIFQDLLIYVLPMKMLYSIQIPRRQKFALMIVFAVGGFVVVTGMIRLYYLQGAQASQ
DPSYDNVGGAVWSCIECNIGVVCASLPHFKPLFDRFFPSLMGRSVGASNHNGHSGGPDLR
NNYVKQNNEYELENGGAKKKVWKDTYEGKYGKDLANNIEVGDTIYGGNDSEERLRGLTPP
ETEGYNAGGIYKSTKVVVSRLPAN
>ad58d783-71a2-41f7-9ccf-6fb886a484f4 (mRNA) 467 residues [BFAB_07:2326480-2328330 - strand] [peptide] name=Bfab07g06090.1
MSNLDQIVKGAPPPGAHIPPIPSTGVTPSEPSITDPLASLPSSPPQIYLNLLILEASLRA
QWLQLRTRRRQHAFFLSLLGLWIIWFGYALFLAPREDGSGVGGSVYWVVEMTEKMCFMGG
IVTALLIWGTGQWERGIRWPRRFVGITNRGLRGFNCKLVVIKQSWWKELLSALSFLFSYG
LFSGSSGGSSYRFVDQSLLKESEKATKNGGHHALRNIHDDDDTKRYEEDLAPGGDYVKLL
LLPKPFSPNFRENWDIYRTEYWEKENERRKILRQKLKERERKLAKQQGGWLWWTGYRGWS
SGHATDVEKIHHRPRRQSTASKRDRSASVRSHSHSRNSSRSATPTAEADERPGSSHTRKA
SSASTASERRRKKTLSVPTSGQKLAPPSPRVGAGGSRSSTPDVPSPLVRESSYTSLSSLD
SERPVTPLLGDAESASTRSLRSSTKGKSGNLRASRIDALAAEGGDEK
>38c69d40-ff02-4ea6-972c-7dca7ce0ff28 (mRNA) 533 residues [BFAB_07:2328675-2331022 + strand] [peptide] name=Bfab07g06100.1
MATSDTEASRSQQSPLASSREASKGVPQAKGFFPLGYKPAFSQWWASVSPAVAEHTVMSF
VPYLQKPPTHTQTGSAPVSAGTSTLSVNDDPNALSTPVQTNSINDPYGPRQWHSNLVKLS
GKNRALNEFSVERVGEKVEDTLVMLHGYGAGLGFFYKNFEGLSRVPGWKIYALDMLGMGR
STRPPFKISAKDQAGKVAETESWFIDALEEWRVLKKLDKFTLLGHSMGGYMAVAYALKYP
GHLNKLILASPVGIPEDPYATSAAMPEPEESTLASEFTQDQEADIVSSSSSNPSRRTTGG
DNNNFGNMRNKRENNKSKNEPAKRPLPFWLTYLWDANVSPFSFVRWAGPFGPRLVSGWTS
RRFSHLPSNENEALHMYAYSLFRQRGSGEYALPYILAPGAFARSPLIHRIHGVGRQQIPS
TSTSPITQKEHGYPVLLMYGDNDWMDVAGGYAAEQACKEEREKTLAKASKEEKELENGSA
KVVIIQKAGHHLYLDGWEEFNEFMRGEMKETTMDNRKMKSVLEKLGVEVEERS
>de96c1ba-12a7-4166-8195-073539879066 (mRNA) 376 residues [BFAB_07:2331095-2333334 - strand] [peptide] name=Bfab07g06110.1
MSKTVLILGASYVGLTVAHKLLKTTLSAVPDLKIVLVSPTTHLYWNMASVRAIVPGQFGD
EKMFAEIAPGFSKYPSESFEFLLGTATSMDAVAKTVTIKTTAGHDSVQSYDSLVIATGSH
TIGEVPWKGAPSGYEQTKELLHRFREKVANAKIIVVGGAGPTGVETVGELGFEFGKTKDV
ILITSSDEILKGAVTSPIASGAQKELEKMHVNVRLRTRINSTKVLPTSQTELSLSNGEKL
LCDLYLPTLGTIPNSQFIPRDLLDGQNFVKVDPQLRVHGAEDVWAAGDIIDAQPSQFVYA
DKQAHALAKNLDLVLRSKAPVVYKTDGAPMIAVALGRSKATGRSGNFKLPSLIVWFVKGR
TLGTQNLLPYVNGTKF
>1d0c73fa-e470-4dc9-a562-2c2361b8eaa4 (mRNA) 1043 residues [BFAB_07:2333716-2338154 - strand] [peptide] name=Bfab07g06120.1
MTSILAANPLNFPANNIMADKNRGRRRSRISLKTTEDDGELSHEELPEGHTSGDDGPSRK
RRRSRKGLDKKFECSTSGCGKSYSRAEHLYRHQLNHTPKQIYNCDFEGCSRTFVRQDLCN
RHRDRHTAKGSQLHRKDSMLSQGSPVSQIPQPQVPRGSASPEVTRPSLVGPKIQTTQIPY
QSPQDIRPTSYSPVTKSAPGTYSGAGAINGADGYPSANYTRSDSDMIQRGQNSSSAGSNG
RGQRHQSFGTPDTRSSDFSRSLQTNVGHYAMLPNASNNQNYHSNQPHSPHAYISQQNFPP
FSLPPPGFANVTATTMPSREPESQFQTPVSTEYSNGTSQAQHSGPDMVLLDQMTTSNTMP
VFGGEGCYNRSPFAIPEDFVAYLFSSQQNEMGQMSQQPYANYPDATAQYYAPYFTNDIGL
EGFYPHNSHQPHHPMAVTSLLDTSLPETVLSEEKSQAIIDLIKERFNETGNAPLVKQKKD
ALFDGDRSNDSHMMSRKMMQTYIGSYWYHFSDQMPILHKPTFSPDNTPNLLLIAMMAIGA
SLLDNTYAEDVTQAGAELSNFLAWHLRWEIFSDQQFRPPAKLWVFQALLLLEVYEKMYST
RALHERAHIHHATTITLMRRGSSLIGRSALDSPPSAKEQGHNNSRQSSTPGANTPDEWWN
HWITNEATRRAAFAAFVIDSTHATMFGHSTVMVAHEMRLPLPCDEAMWNATSSAEVGRLE
STLQANGVKPISFLEGLKRTLNAQTVRTNSFGRTILMAGLLSVSWHMHQRDLQVNSLGVS
QALGGRDKWRGSLTRAFDLWKRDFDISLLQQSETMTGPYAYTGKENNVVYQSRTVLHHLA
HMAMHVDVVDCQIFARAKRLLGRTIGSQDLNSAQKRMKETWAPTARARDATFYAIKFLCT
VLVPKEPTSASHGYDHAQPDPPFDYSARDDILLNRPWVMYFAALIVWCYGYALEGHTTAP
VPSPDSMDDQVRDMRAYLRRFGSVDNPEELKKLTGLNGCSGMLMVLKSVFEKTRWQLLHE
AALLLTNCINLLGRPTPIPSRDL
>43bc03a9-9f48-40cc-ac28-4be3a4f93cf8 (mRNA) 185 residues [BFAB_07:2339564-2340951 + strand] [peptide] name=Bfab07g06130.1
MRKGPRPQQPDDSEASSTKEKGNPISTPATNGKGKRVASSAVNANLSGPNSTPNASSTMA
GAVGGSNTDGNSKIQWSEFEASFLHSYRYEYGLNTPAAFNSAYNQTVLSQSSIGRMSPSM
VRKNKRQSKEQLANAVRKHFNSQSVNENECVAKTLYKVRYQDKKFRMRFMPQARPMERSQ
PERFA
>56ac3de5-5f45-45a9-b12b-fe6ea46f1a7b (mRNA) 524 residues [BFAB_07:2341149-2343131 + strand] [peptide] name=Bfab07g06140.1
MKTGTTSLLSKAANPSRILYSTPASRHCTLKRDDHKPSQTRSLSTIRASRGRCRSSQNDL
SLNTIQRRSFHASTRNQATKNPYDVLGVDNGASASAIKKAYYGLAKKFHPDTNKDPNAKD
KFAEAQSAYELLTDPQKKAAWDQYGSAAFDQGAGPGPGADPFGGAGGFGGFGGGSGGFPG
GGFGADFNFEDLFKGFTGGKRGRGGGRNPFQEEILVGDSIEVQTNISFMEAAKGTSKTIS
ISPLSTCKTCTGNGMKSGTKRSACKSCGGTGTRVHSMGGFQMASTCSACGGQGMSIPPGG
ECKTCSGNGVVRERKTITVDIPGGIEDGMRLRLDREGDAPATGQAANPNSPSQPGDLYVL
VRVATDPKFSRSGSNILYTATIPFTTALLGGEVKIPTLDGDVSVKVATGTGTGDKITLGG
MGMKKLEGRRGGNGDLKVEFKVNMPKYLSANQRTIVEMLADEMDDKTAKRIMNVGRSSSS
SPSSPSNTEENNKQEGFLKSVWHKFTDGANLPNEGDKEDDSKKK
>00bf5119-d934-4a58-ac5c-af69c28689aa (mRNA) 994 residues [BFAB_07:2344061-2348027 + strand] [peptide] name=Bfab07g06150.1
MQAPMISAPLKATNEIDWIQPLKNYIRQTYGDDPERYAEECATLNRLRQDMRGAGKDSAA
GRDLLYRYYGQLELLDLRFPVDENHIKISFTWFDAFTHKATAQYSLAYEKASIIFNISAV
LSCHAAHQNRSEDSGLKTAYHSFQASAGMFTYINENFLHAPSTDLSRDTVKTLIQIMLAQ
GQEVFLEKQIADGKKVGLLAKLASQASYLYSQALEGTQDNVNKAIFEKVWLLVVQIKANY
MSSLAQYYQALADDDANSHGVAIARLQAAEISSKDASKFANSFPGNVPVNSNFTSETGTT
LIEINRRHLTNVQEKLAELIKDNDYIYHQTVPAEAALTVIPKLPAAKAIPVSELYAGQDI
QRITGPDIFQKIVPMSVTESASLYDEEKAKLVRAETERVETANSEMAASLDYLRLPGALQ
VLKGGFDQELSGGEDFRNWCDDLAGHVSPMSTFDSLKSSKEAIVSILEKSSKQLDMEESV
CEKMRSKYEGEWTQQPSSRLTSTLRNDIRNYREALEEAARSDNQLYSKICQHEVDFDEMR
SAGELGESDVLFQRALIQVGGKSRNAAGSPSAREGNLLDDDFDDGKKSVTDQIAKVEDIL
KKLNLVKRERSQVLKDLKEKAHNDDISHVLILNKKGISNYENQLFQAELEKYRPHQSRLL
SANHKQSSLMKELTLTFNDLLQDKRVRSEQSKYETITRQRSSVMSKYKRIHQEYLDLQAG
LEGAKQWYTEMKDTVNSLDKNVETFVNNRRSEGAQLLNQIEQDRASNANGHADRERERLR
GLMERMSMDPSTSPTSSKPPHRGSNAYSNTSPSTRYPSTNFAGQYQVPTSPPPQTTTAPP
ARGSIPASANGGYYPQQQPQRADPYSSAPGRSSPYGQYNPSTHSRNPSQPLSPPPNQSQF
PRSPPPQQTQFQQNQHPYATMAPQQQGQYVPAGYVPPPPPPGPPPLGPQQTYHQPSGSMA
GHNDYGYGNSATSHQRGQSQQSASDPWAGLNAWK
>138209dd-994b-4e51-b0f3-a90c5ffcc294 (mRNA) 1102 residues [BFAB_07:2348251-2352127 + strand] [peptide] name=Bfab07g06160.1
MLYGQNLPWRIALRNVTIKQNTEVSSTVLRRTIRQYHGRTAPSSVSLRSPSFRSGLGGVA
RFSTSPTVRKDVPKDLFNQAEITSAEEKKEKKSKAQTESVEEVSGEKEIETKSKTGEATS
SGSNTSSGSTADGKGSSAGGAGDSGNNDGGKKGRKGASEKALQKTMVPEVYPQVMAIPIT
KRPLFPGFYKAVTVRDPNVVAAIQDMMKRGQPYIGAFLFKDDNMDKDVIENIDDVHDVGV
FAQITSAFPVHGDDSALTAVLYPHRRIKMSALISPERENTDAKKTEGTQAEPPVPEIIPA
KSTKEEPFEKKGDVVASFEEGTVTQKTSDRPVLPYEPISFLRKYPVSLANVENLTEESYD
PKSPIIRAVTNEIVNVFKEVATLNSLFRDQISTFSMSQSSGNVMSEPGKLADFAAAVSAG
EVSELQDVLETLNIEERLQKGLTVLKKELMNAQLQSKISKDVENKIQKRQREYYLMEQLK
GIRRELGIESDGKDKLVEKFKEKAAKLAMPEVVRKVFDEEINKLAHLEPAASEFNVTRNY
LDWLTQIPWGQRSAENFGINNAMTVLDEDHHGLKDVKDRILEFIAVGKLRGTVEGKILCF
VGPPGVGKTSIGKSIARALNRQYYRFSVGGLTDVAEIKGHRRTYVGALPGRIIQALKKCQ
TENPLILIDEIDKIGRGHQGDPASALLELLDPEQNTSFLDHYLDVPVDLSKVLFVCTANM
TDTIPRPLLDRMEMIELSGYVADEKMAIAERYLGPAAKELAGLKEVDVNLSKEAIEELIK
SYCRESGVRNLKKQIEKVYRKSALKIVQDLGESVLPEEEALTEEGKAALEESKKDETDVK
ETPETIEKETTEVPRVSLKVPDDVHVTIGKDNLKDYVGPPVFTSDRLYDVTPPGVAMGLA
WTQMGGAALYVESILESALSPSSTPGLATTGNLQAVMKESTTIAYSFAKSVMAKNFPDNH
FFDKAKLHLHCPEGAVPKDGPSAGITMATSLLSLALDRPLDPTIAMTGELTVTGKVLRIG
GLREKTVAARRAGSKMIIFPDDNMSDWLELPANIKDGIEGKPAKWYSDVFDLVFPNLDKE
AANGLWKDRLVKKKGEKDGDEE
>3546c624-56b3-42e6-910e-d274eaafb8ad (mRNA) 767 residues [BFAB_07:2356990-2360790 + strand] [peptide] name=Bfab07g06170.1
MGKYWLKFARRMMAQAEPGSPESNDHKISWFRKLIFPKKGENHTPPSSPPNEARPPGLGR
RLSRRVVPGLPRAGTFKRQQSELRDRLEPVKPNHDERRTASVDRRLNNSHRSSSAAINRG
PRTSAPEFLERVETIDKTFDNVSVRPPTATTNEHENESQEYVDVSKEEKQGSHIEEQSIS
TDTFDERILEELEKRWILNLSMHFRDKSKREKFFVTYAESPTHWRRVTISLDYRNAPSNS
LEEELQRTRFQRDKSARIYEAIRESLQDIQFYDTVTNLKLETQDERLHVHVVEDLSEVIN
FPPIKALDHLPCRRFLEAELEFDSHLSGFVYKVTVAGQVFIKKEIPGPDQVDEFLYEINA
LHQLSGSHSVIQFGGVVLDNEAKCVKGLLISFAEQGALIDVIYDGDNGIPWARRERWAKQ
IVHGLSEIHEAGFVQGDFTLSNIVIDGDDNAKIIDINRRGCPVGWEPPEVAELIASNQRI
SMYIGVKSDLYQLGMVLYALATQHDEPETQRPLKLSDFPPDVPEYFLEVCGRCLSDDPRN
RSQAAALLDFFPDIDEYRGAYDGQSPTPIVIDVRHADEGELLVTVHDNNDRRDSISDIHD
YDVPERGRSRSKPYSPPFILSRSPDAAVTYLNTQDIRPSQIQLPSSTSGSDYTRDPIDRQ
YNYQNTSTIENSTLETRQEQNSERPSYSENDKTDIQPNSTTEPRTTVATNNISMAFAGDL
AHIGTGVDSAHMGTLFGAVNLDDDDLTIDNDGNGVLFMTSEEKMAIS
>906ac8ba-1d0d-4542-918e-761ed4426cfc (mRNA) 610 residues [BFAB_07:2360854-2363727 + strand] [peptide] name=Bfab07g06180.1
MAVTIDSGPQDGPDRIVSENSRERTMGERLRGTVRAFTTKEGLVGNYDYAFLFKPNLPFM
KKSKRRAPFFGLQDRMPVLLGLLLGFQHALSMLAGIITPPILIAGSAYFDTETTQYLVST
SLIVSGLLSAVQITRFKVMKTPYYIGTGLISVVGTSFAIIPLASKGFSQMYANGMCKTAE
DGTPLPCPEGYGALLGTASLCALLEIGLSFMTPRLLKKLFPPIVTGPTVMLIGVSLILTG
LEGWAGGSGTCMSRPTSGDYMFCPSNAAPHPLPWGSAEFIGLGFSVFITIIICERFGSPI
MKSLAVVLGLLVGCIIAAACGYFDSSGITAAPVASFIWVKTFPLSVYGPFILPLLAIYLI
LMMEAIGDITATCDVSRLQVDGVLFDSRIQGGVLADGLNGMLAGLCTITPMSTFAQNNGV
IALTRCANRKAGFAACFFLVVMGVFAKFAAAITSIPDAVLGGMTTFLFASVAVSGLRITS
TVPFTRRTRFILTASLALGYGATLVPTWFSYVFTYTGDNKAKAGFFDAIVLVMETGFAVT
AFVAVALNLGLPEEDEDEEVESLAGDLGEREAEERALEGRELGTMGEHGSRSGSFEMGKA
GEVGLGREGK
>f0bd7978-90f5-40f4-9de1-55613210e421 (mRNA) 290 residues [BFAB_07:2364891-2366690 + strand] [peptide] name=Bfab07g06190.1
MRVVRILSLVAQSVMVVRGTSLTCQTQIDPSSVSVATRSQWCTSQVNTCGTLCGGVTDEN
SCDITSLCYECTCTSNSSSPALQLYISTIPFFVCEQRYVNCILAGEDDPAAQKICRAIEE
ENCGTLDPDTVSSFASTLPSRSTGIPTPIPQMTSQTETSTGTEDLITSTTKTVTPTPTGT
TTVWTTSTASSGSESSGNGTTRSGSSSESAGTSATRSLSSSSGVTDVSSGSGSTATSTVS
RTSSSGTATGTAIGTSTPSTISEGGAERMRIGATWMVWGVLMAVGGFGFM
>e4662599-7d9a-45a8-92b8-80bbaca11a8a (mRNA) 472 residues [BFAB_07:2366757-2368679 - strand] [peptide] name=Bfab07g06200.1
MEIIAPQVNQPSPLFETGESAVCFRIQGYLHMVKNRFQDEPQVYEHFIETIQNFQEDEEM
SREDFEVAIGEILEGHDDLIQEYHRVRILFDEREAFELARAQVEEGEEAREKKEALRKIA
SAERQAAHIRACEAQSKSVLLHLPREIRDTIWKDVVQGNIVHISRVDDASSSTVTPSSFM
YHSCVATKGLESSACPAGEGDHALCARTSRSDFPSYRLVCKQMNLELPDARVTFFAKNAL
HFDNLLDAEEFLFGLEECDRAAITHLRLPVPYSLAVNRYAEGIEFSAWEAIMNYFSCPWV
RETLRLDDDNSTFLKKPWYFYYSSCYYYHNSDRMYKKWQVGFGSTSWDVDIASLRYKGEP
RMDIGMNYPESAQSTLFRPRLHQHIPFTTQFDNPPPWLRSLLQFRQYSGLNFHFWASNPT
SQGYGIVRVPRYEAFIEALQEEVSRSEIGPWKLVEFRGAPFGNPDRCSLRNL
>2238c44a-8af6-4e13-bdda-3d5ed31247f8 (mRNA) 714 residues [BFAB_07:2368884-2371763 - strand] [peptide] name=Bfab07g06210.1
MVAISRVHGSMAVKEESSYHPTDDLIRLSPRKYYRASISPSHWQLHDLLNSPKQHVVYYP
SSHDIICLNTKSRERELLATLKYEPRCLTAAKDWVCAGGDRGQFTSFYVGEGERPGKSNS
GFDLSADADARLPLILQPSARSIQRESTDDSRRSSPDAPTPHVTEKIGSDVVNCITLWFP
SESSLPMGYKEPVAVAALNDSSVAILNLHDSELLDALTYPDYVNRAVISPKGNILIAICD
DPFLYIHKRQPKRVSKTHCTSRANEEYEWVFSGRIQLEGQRPSDKSAMRGSFAACFSNSG
KYLAVATQYGVISIFLAERLTRDDVDPLEVSFTTSRPNVESGAVRAMEFSPNNFDLLAWT
EASGRVGVADVRDLFTSRQVIDINSRGEGVERVWVTERSNNHTPIEARLDARPRGFYTEP
PSEASASAIPDHLGLDFDRQQPRILARDLADRHQLPPTADEMETLQAHRTARRQRDAIRE
AREMGTASRWGILEGGRMTDVFAETERRISTAGLPSALREFVNSDRTPASFRAFIDRQNQ
DRERRVVQNEIRNVIRRQQASSVLDDPTVDAESDRTVRTSADTFSGLERLSLAPRLPTID
SEAAPNAWAELEEVYRTRYSRDQPGDEEEEDQESGQRPRPPWGSSDALTRLSIDVRNDSN
ILRREREGRSEPVDTMGLAWSEDSRLLYIGAGDGIHEYQVNVAGRKIFPHRVLQ
>3db5e7a0-599b-4e0a-beb5-e8a895f505d1 (mRNA) 679 residues [BFAB_07:2372070-2374739 + strand] [peptide] name=Bfab07g06220.1
MFASRISRALPRATSSVTRSAPLRTPLGSSFTRRWNSDDADKKVKGPVIGIDLGTTNSAV
AVMEGQTAKIIENSEGARTTPSVVAFAQDGERLVGVSAKRQAVVNPENTLFATKRLIGRK
FTDAEVQRDIKEVPYKIVQHTNGDAWVSARGEKYSPSQIGGFVLQKMKETAEAYLTKPVQ
NAVVTVPAYFNDSQRQATKDAGQIAGLNVLRVVNEPTAAALAYGLEKDEDKIIAVYDLGG
GTFDISVLEIQKGVFEVKSTNGDTHLGGEDFDIHLVRHLVQQFKKDSGIDLAGDRMAIQR
IREAAEKAKIELSSSMQTDINLPFITADSSGPKHINQKLSRSQLEKLVDPLITRTIEPVR
KALKDANLAAKDIQEVILVGGMTRMPKVSESVKSIFGRDPAKSVNPDEAVAMGAAIQGGV
LAGNVTDVLLLDVTPLSLGIETLGGVFTRLINRNTTIPTKKSQIFSTAADFQTAVEIKVY
QGERELVRDNKMLGNFQLVGIPPAHRGVPQIEVTFDIDADAIVHVHAKDKSTNKDHSITI
ASGSGLSDAEIQNMVDDSERYAESDKERKAAIEAANRSDSVLNDTEKALNEFADRLDKTE
ADGIREKITALREFVSKSQSGEGTATAAELKEKTDELQMASLNLFDKMHKARAESGEAKP
EGTEGSASEGEAKDGEKKP
>02bd3932-566d-45b5-b01a-6421d4e7e970 (mRNA) 288 residues [BFAB_07:2375293-2376710 + strand] [peptide] name=Bfab07g06230.1
MSRVANNRDWADDEDLEDSNELPQSTTTTNKDGTQTIVTWRFNDDGKKVKTTRRIRFTKV
KEIVNPRVAERKSWGKFGLSQKDAAGPASDTTSVGENIIFRPSTNWRKDAKEEVSDAGAM
KNKLKDKQVKCRICSGEHFTAKCPFKGTMAPLGEEGAVDVAAGHADTPEGPGGLGAGKSS
YVPPHLRNGGTAGGERMGGGKFERDDLATLRVTNVSEMAEEQELRDMFERFGRVTRVFLA
KDRETGLAKGFAFISFQERSDAAKACEKMDGYGFKHLILRVEFAKKAS
>00d7e4ca-e6e4-4351-bf2e-a40f87372731 (mRNA) 509 residues [BFAB_07:2377632-2380034 + strand] [peptide] name=Bfab07g06240.1
MQKPPAWVIAAWPEPNYVDPETHGWGNVILNIVLFVVLCCFISLRIWTRTRLRASFGADD
MMILFAMIPTTGFFVLSLLADLKFMWTRHQYDIPSSHVEFGLKMVLLIEIMFASACTFTK
LSMLMLVRRMLTSATIFWRRVTLGAICIVGLQGALFCIVLVFQCRPPQDYWKITDEPQPN
CIDQSSTLLFAGIINTLTDFLVVILPIRTVYSTNLPRRQTLIVSFLFTLGFLSCFAGVIR
TYYMYQVTQTYDQVWASFPVWVSAAVELYVGIICTSIPATKVFFATYIPKIFNSHPSRPS
QSSFSAPNIFKSLPIPPPGFGVTSTSKSTNSLPKSKSRSNSNPNILHSQSSQVPLNGREE
DTQYDHDTDLDQTIGTSIFELGSYTNRSSKSSKTSTTPIIADEEVYIGTASVISPLSSNP
ISNSTNNIANLGRNILGSVRRDKLTLGGDRSRNRSRSRNRSRNQDRENDDPYMSISEESR
RKEKEGGWDIHIDVVRTVEVEEECIAERI
>c8ad2ad5-830d-4037-9aeb-1b61092b612c (mRNA) 510 residues [BFAB_07:2380264-2383507 - strand] [peptide] name=Bfab07g06250.1
MNRPGVGPQAMRGIPNGFPNQQQMQNRNVSNRIPPSGKMTNNGATWAFGGVPMGGAGLGN
PRPNNGPMASFAQTIGGSSQPATPLDLSEFPSLSGNQPQHNQSTWGAAGARNIGPANIRL
QQSAGLSAQHAAQQQQQQDELFNSSTQLSNNSGGFRFGAQNAVGQSSQPRSADDFPPLGN
SNGEIGQDRSSGLLQNVGFGAGGGLGFGSNNPPQQARSNGLLNALSTGGRVAPGNRIDSP
ASLSGPSTNRSPIDSSRQGLPRLGENEVGSFPDTNFGSSNPIPLREDDNQQFNMPTTTNS
RPDGPSTLTQAQELDPSSLSRSADNADSKVQDPLAHMSDTDRFGLKGFSYMMNNFPDYAA
LVTGTDISHLGLDLNSEQPISSQIYSLWDNEPPRPDVARFNLPECYRVLNVAPLESKMPN
FNEEALLFMFYSNPGDKQQLMAARELGNRNWRYHKKMQVWLTKDDLMVPRQLTQQMEQGY
YIFFDVKTWSRQRREFTLSYDDLERVEDRF
>45bcc7bb-07ec-4984-b9af-74b45a075d34 (mRNA) 750 residues [BFAB_07:2383714-2387501 - strand] [peptide] name=Bfab07g06260.1
MTGTGRLDLSKQSIPGQHLLTLERDPQAQHSQRFLSSARSYADLNYLFGAQDITMIGPIP
KPNRRKSSQGTEHVKHRRTRSGCYTCRSRRVKCDEHRPKCDRCTKGNRECVYPDVQKSTK
GAANTSSKAGQSKPSESPGSSEDEYEDRDVERLEVIPDEDEIESQSKYSKSTNINASAQS
SQSSTRVKSSTRQSSETPSLIQETGSSPTPSTEGSIGYSSFDQLGGSPQFYDQTLANDLG
SDKSWSGWSHLPPDLQFYLTYYCQNITFMHYSLRSNNEGFIHKLLLDVAIRHEPLLYAVV
GFSAFQYAVEKQEGKIQDFLQYYNKAVSLLLVSLKKGAQHTTGTLLAILQLATIEEYLGD
WANLLGHQKAAYEILVDLYSPQTIFETGISRAIFGWYARFDVMAGIMGGFDASISREWFS
YAQEYFKNKIAQEPDDLVWRLEHQSSAMRLVGKDMSTLFAKQGKGEITHEQFVFENAKMA
QRMKNWRDDMDPALLDSRYLVTDFPPAQPGSLFDPCMPGLLYRGPLWTINIDSMDRYAVA
LMHGLHTAQAMQMPPDFEVMNRLSEDLCQMYEAILHHPETPKGAAVGLQGGLGIAVFFLS
KDEEYNMWMRRKLATIESQGFIQTFAFRSKMAELFRDNSCMHWWLPNDELYHPIIRSIRK
FVEDRTSSPKNAESKDVQDMKAVFSAMDISDQSDSSPQMSNRGKSVATDVDVASSSGWSP
AQTSNDYSQNEYGGDFRSEQSSWNNQSGSY
>f3bb9be6-08ff-4d34-8660-8a94b8673840 (mRNA) 1179 residues [BFAB_07:2394293-2398384 + strand] [peptide] name=Bfab07g06280.1
MRVVEVIIDGFKSYAVRTVISGWDESFNSITGLNGSGKSNILDSICFVLGITNMTTVRAQ
NLQDLIYKRGQAGVTKASVTIVFDNRDKKKSPIGFEEYAQISVTRQIVLGGTSKYLINGH
RAQQQTVQNLFQSVQLNINNPNFLIMQGRITKVLNMKAVEILAMIEEAAGTRMFEDRRDK
AFKTMAKKEMKVQEITELLKEEIEPKLEKLRTEKRAFLDYQQTQNDLERLTRVVVAHDYL
KNQEKVAQSANDLDLKKQRAIELEESANRLKSEISFLEEDIKRVKAQREKELKEGGKSSA
LEEEVKKYSHELVRLATVMDLKKSSMAEEQERKLATQKTVSEMESLLKQKTKVYEKVQSQ
YDKAKEDLKKQNLEAETKEELLQTLQTGVASKEGQESGYQGQLQDARNRMSAASTEQEQA
KLKITHLEKRIKEEEPRSKKAKEQNAGLLGDLEGLRSEAQKLEKELQKLGFEAGKEDDMY
KQESTIQQNIRRIREQTDVLKRKVANVDFNYADPTPNFDRSKVKGLVAQLFTIDKNHTAA
GTALEICAGGRLYNVVVDTEVTGTQLLQNGKLRKRVTIIPLNKIAAFRASAEKIGAAQRI
APGKVDLALSLVGYDEEVSTAMDYVFGNTLICADAATAKRVTFDPSVRMKSITLEGDSYD
PSGTLSGGSSPNSSGVLVTMQKLNELNKELRSQEKELADLQATIAREKKKMDQARKIKQE
LDLKSHEVKLTEEQIGSNSSSSIIQEIENMKASIIQLKQDLVEAKKRQDEATKDIKRIEK
DMKEFDSNKDGKLVELQSSLDSLRKALTKNSAAVKALHKELQSAQMDTEQVGGDLSNAQE
QLQEVEQTLKAQEEEITSLVSEQAKVKDSHDISQAHLDDERAKLTGFDDELHSLEQASRS
KASRITEEGLEMQKLGHQIEKFHKEQQAAVQTVSHMEQEHEWIADEKDNFGRTGTPYDFK
SQNIAECKSTLRNLTERSQGMKKKINPKVMNMIESVEKKEIALKNMMKTVIRDKKKIEET
ISSLDEYKKKALQETWQKVNKNFGQIFAELLPGSFAKLDPPEGKTIADGLEVKVSLGKVW
KQSLTELSGGQRSLIALSLIMALLQFNPAPIYILDEVDAALDLSHTQNIGRLIKTRFGGS
QFIVVSLKDGMFQNANRIFRTRFSEGTSVVQSLTAADFN
>2a45cda6-ce0e-4c78-9618-9b1c27b03080 (mRNA) 463 residues [BFAB_07:2404460-2406961 + strand] [peptide] name=Bfab07g06290.1
MSSLIQPYVDLALRQLEIYKDQLIQQIPVISTTTYVLTILAICIPPIVLLVFYEIEQSRQ
RAEQPKGCRKLGLKIDSNLTNEFDPKFSVGRPPSTEETSAEWWRLKSMWIYPVKSCKGVE
LGRGTIIASGMEYDRQFTFAQLKSPFPVAENDPNSQKAAHKWEFITQRQFPLLAKVRTEM
WVPDQSVDTYAPHIDDVESGGVIIMSFPYQEPGWRGTVASWGAKVMGTVPEKQFRVPFDP
SPVQIEKAGYTVEKMTIWRETVDALNVEIEIPEELRYYLGISNKLGLFRVDSAKPREVFR
NAPSKEELGYQPVTGFQDAYPIHMINLASIRDVESKMPKVKGAPRLSAGQFRANLIITGP
PAYHEDDWRRIKIGFYEYDVSCRTVRCKMPNVNQETGVRHPSEPDKTLRTFRAIDEGAGK
NLGCLGMQLVPTTKDGALRVGDEITVLEVGEHHYQKLFPELNN
>d48e919a-c520-4fe3-b4c6-b95d8baaf68b (mRNA) 194 residues [BFAB_07:2407211-2409467 - strand] [peptide] name=Bfab07g06300.1
MAPAESQGKFDAKNDVGLKRLGVLMKGWKGSKEGYIGWGHDLLPSLSLSTDPEHHTENVT
TFIFKPTVHHCNANSTVHGGCIATVFDACTSVALMGRYSAQKWGGGGVSRGLGCTYLKGI
TIHEESEGEEGKNDVLVECEVVGGLGKRNVVLRATMKRRTGEVLAICEHSKVNIVGVELP
GSKEKGREGKESKL
>623b8c32-f458-4557-895a-0a510f34d413 (mRNA) 467 residues [BFAB_07:2409667-2411868 - strand] [peptide] name=Bfab07g06310.1
MASNVSPPSSMAKTSEPNRNKKYDPKKPHITEEPITKANWYKHVNWLNVTLIVGVPIYGL
IMAYWTPLQWKTAVWAVLYYFMTGLGITAGYHRLWAHSSYSATLPLKIFLAAVGGGAVEG
SIRWWSRDHRAHHRYTDTDKDPYSVRKGLLYSHFGWMIMKQNPKRIGRTDISDLNDDPVV
VWQHRNYIKTVIFMGMVFPCLVTGLGWGDWFGGFIYAGILRIFFVQQATFCVNSLAHWLG
DQPFDDRNSPRDHVITALVTLGEGYHNFHHEFPSDYRNAIEWHQYDPTKWSIWMWKQLGL
AYDLKQFKSNEIEKGRLQQLQKKLDQKRQTLDWGIPLEQLPIIDWDTYQTEAKNGRALVA
VAGVIHDVTDFVKEHPGGKALITSGIGKDATAIFNGGVYNHSNAAHNLLSTMRVGVLRGG
CEVEIWKRAQRENKDISFVSDTAGQKIIRAGSQVTRIAEPVPSADAA
>45883d91-9d32-41b9-8aa1-ac2bc448db22 (mRNA) 727 residues [BFAB_07:2415950-2418876 + strand] [peptide] name=Bfab07g06320.1
MSKLPPVQLDEGAPEMSPTTSTITSSSKSQRVLACRRCQQRKIKCDRGEPCSSCVKSRVQ
CIPATQFPRQRRRRFAERELLDRLRKYEDLLRQNNIKFEPLHKGSPRTGSHNDSDDEQPK
ATASTSSPSSTTNPDKIHGVMNLWHAMNQEFREPDNISDSDDDDVRGGDVKRVWDQVSDN
DNFLFGSRISNVDISTFHPEPVQIFRLWQIYLENIDPLLKVTHTPSLQALIIEAAGNLRN
IRPQLEALMFGIYCVAISSLSYEDCQLMFYTSKSDLLTRYQFGCQQGLLNSGFLRNRDDR
DTLTALFFYLMSFRTKSVPQSLSSLLAIAVRIAQRMDCHNEFALSKLNPLEAEMRRRLWW
SLVLYDTRIGEIADSKHVILTPTWSCNIPLNASDSDFHAEMKDPPQSQQKPTEAIFTVLR
GELGNFIRNTTFHLDFNNPTLKSAAKNHQHDFTTEGSELTDLEKMVEEKYLRFCDPKNPL
HFTTIWTTRMSLAKWHLVEHWHFSGKNHYSKVGLVRDATIAHALNMLECDTKLMTSPLAK
GFMWMSNMHFPFPAYFQIVQNFKRRPLCQQAEKAWETMTENYEARFNSLLYDEIPGPFFL
IFAKIILQAWEVREVAFRSMGEEIAEPGIVSSIRQRMAGMTQMGEEGEGQVGKKGVEVDG
HDFSRVAPISFYGLGEELGYPASGTSGAGAYIDTPGMGLIDADISTLDWSAMDWGAVDMN
ILAEQTG
>2a2f0e99-b58f-46e9-8e7d-ae2fabd400b0 (mRNA) 191 residues [BFAB_07:2419820-2421519 + strand] [peptide] name=Bfab07g06330.1
MRLPTFPLSKILHPYTPTPETIANLSLSHIDTDPQKNFSGPLQVSFSEKRDGLPKAWVDA
WKHMGRGLSSAPFTGDAVGGYINAMNIDAATKTSSHALSAYYAPIAMRENLVVVASAPVT
RILFSDSRDEKGDVLATGISHTKDSHSCTAVAKREVILAASALQTPKLLELSVWDWFCGS
AFGSGYSGTCR
>681437d6-0fb9-4b35-9bd0-508147b3046b (mRNA) 245 residues [BFAB_07:2422607-2423917 - strand] [peptide] name=Bfab07g06340.1
MFIARSEYDRGINTFSPEGRLFQVEYSLEAIKLGSTAIGVATGGGVVLGVEKRVTSTLLE
TSSVEKIVEIDRHIGCAMSGLQADARSMVEHARVESQNHSFHYNEPLRVESCTQAICDLA
LRFGEGADGEESIMSRPFGVALLIAGYDEDGPQLYHAEPSGTFYRYDAKAIGSGSEGAQA
ELQNEFHKSLTIEEAETLVLKTLKQVMEEKLDSKNVQLASVTKEKGFRIYTDEEMAAVVE
RLPAN
>9d6a9eb8-0c4c-4c6a-81f2-09e2236959d1 (mRNA) 913 residues [BFAB_07:2424133-2427294 + strand] [peptide] name=Bfab07g06350.1
MSSQARVSSQSERRSNDNPRSRPPSALAGTRNERPDVRRRPSPPPGAAESNHRRAQSSSQ
RSNRGVDERRTERVHISSRETVTSRTRSPDRRAPTERPRANDTSRSRGEEIPLKASKVET
QPVLPWDPQVSLVPHTTAPLASRISIPPLASQAPQALQPQPLHELSLEVQEAAILEDLLF
VFMGYEGQYIRFGKGYDPLIEKDRLAGPSFRILPGLDPSLQDLTTTMLKMATNYGATEAF
VEVQSREEFGAVNHALCAAMRKLLQDYLILIAQLETQFLTNPSFTLHVLNLHTLPTSHMM
LQLSSLAHEILKRNSMLEEDEEDGDGMDDFENILESLREGGDLGLGNIPGKKICKGGSVL
GLITKRLETMSGDPAARSLLTSLLRDASRPYMVMLNEWLHHGSIKDPHAEFLVREQKSIK
RERLEEDYTDEYWERRYTIRDTDVPPQLEGVKDKVLLAGKYLNVVRECGGVDVSKEVKDV
PRSFDDNRFLENVNSAYAHANESLLNLLLTAHSLPARLRSLKHYFFLDRSDFFSYFLELG
NSELRKPLKAVNTSKLQSLLDLVLRQPGSVAAQDPFKEDIKVEMNDISLTNMLTRVVNIS
GIEQGESLQTPAQPVTENDKAAVGFTSLQLDYSVPFPVSLVISRKTVWRYQALFRYLLSL
RYLEQQLVTCWQTHNRAATWSHKSSNRNLELWKRRVFTLRARMLVFVQQLLYFCTSEVIE
PNWQGLMARLNAKEDDKVGKTPAVRTVDELMQDHVDFLDTCMKECMLTNSRLLRIHSKLM
STCTMFATFTSWLSRELEKIDTDLLGTERPSTMNSQQWARYQRDRGSRNGEANNGNPFSE
GGFDEARLEKMYEIIKKYEFNFSKHLQILLDALNHYAATETVVLLGLCARLSTANQGTQF
NGLRTDEDGAGQQ
>55639240-a5c1-4f7a-ac19-7f3671a4e04b (mRNA) 622 residues [BFAB_07:2427662-2430585 + strand] [peptide] name=Bfab07g06360.1
MHIKDMLSEAERSGNPSFSFEFFPPKTAQGVQNLYDRMDRMHGLGPSFIDITWGAGGRLA
QLTCEMVGVAQSQYGLETCMHLTCTDMGKEKVDEALRNAYKAGCTNILALRGDPPREKEK
WEATEGGFQYAKDLVHHIRQTYGNHFDIGVAGYPEGCDDQDDEDLLLDHLKEKVDAGATF
IVTQMFYDVDNFIDWLGKVKARGVNVPVIPGIMPINTYASFLRRCNHMGCKIPPKWSAAL
EEVKNDDAAVRNIGKDLVAEMCRRIIEAGVHHLHFYTMNLAQATRMVLEELSLTPSNQRP
LKHALPWRQSLGLGRREEDVRPIFWKNRNKSYVARTQDWDEFPNGRWGDSRSPAFGELDA
YGIGLKGSNEQNIKLWGQPKSIKDIAELFVSYLESGIESLPWSEAPISSEADIIKSDLIE
LNRRGFLTINSQPAVDGVKSSDPVYGWGPTNGYVYQKAYLELLVAPDMMPELVRRIQHEP
DLTYYAVKKTGDVQTNAQSDGPNAVTWGVFPGKEIVQPTIVETISFLAWKDEAFRLGTDW
AHCHSALSPSRGLIESIMDSWYLVNIVHNDFHKSHGLFPLFDGLTVKNLNEPFETSESGD
[truncated: 6,865,701 more chars]
