# Supplementary material for: Genome Comparisons between Botrytis fabae and the Closely Related Gray Mold Fungus Botrytis cinerea Reveal Possible Explanations for Their Contrasting Host Ranges
Source: J Fungi (Basel). 2024 Mar 14;10(3):216. doi: 10.3390/jof10030216 (PMC10971195; doi:10.3390/jof10030216)
Supplement: Supplementary file 1 [file jof-10-00216-s001.zip › Table S4.xlsx]

## Sheet: Table S4 Bcin-specific
Table S4: B. cinerea B05.10-specific genes
					Presence of homologous DNA [%]						Size of protein [aa]										B. cinerea B05.10 gege expression (RPKM)
Name	Size [aa]	Intact?	SignalP	Predicted function	BfG12	Bf11002	BcinT4	BcinDW1	BcalMUCL2830	Bpseud	BfG12	Bf11002	Bf611	Bf612	BcinT4	BcinDW1	BcalMUCL2830	Bpseud	Loss/Unique	Genomic location	Inf. Tissue	Asco	Germl	Mycel	Sclero	Mean-new
Bcin01g00140a,b	179	no	no	Fungal specific transcription factor (GAL4-like Zn2Cys6 )	0	0	100	100	0	0	0	0	0	0	217	216	0	0	Unique	Inversion border	4.55362	3.01619	1.5367	5.00189	0.756141	2.97291
Bcin01g00150	77	n.a.	no	Hypothetical	0	0	100	100	0	0	0	0	0	0	0	0	0	0	Unique	Inversion border	0.267715	0.971405	0	1.01507	0.0834661	0,47c
Bcin01g00160	274	yes	no	Short chain dehydrogenase	0	0	100	100	0	0	0	0	0	0	275	274	0	0	Unique	Inversion border	319.92	118.962	0.946045	110.198	1.87315	110.38
Bcin01g01340b	518	yes	no	Tannase and feruloyl_esterase family	0	0	100	100	0	100	0	0	0	0	519	518	0	316	Loss	Inversion	1.00207	0.54516	0.219484	0.173402	0.0288226	0.393787
Bcin01g01350	398	n.a.	no	Hypothetical	0	0	100	100	50	100	0	0	0	0	399	398	0	399	Loss	Inversion	1.28558	3.17556	4.8747	3.28028	1.73643	2.87051
Bcin01g01360	233	yes	no	Hemerythrin HHE cation binding domain	0	0	100	100	0	40	0	0	0	0	0	0	0	0	Loss	Inversion	0	0	0	0	0.027395	0.00547901
Bcin01g01370	521	yes	no	MFS transporter, multidrug resistance	0	0	100	100	0	0	0	0	0	0	522	545	0	0	Unique	Inversion	0	0.0292174	0	0	0.0277945	0.0114024
Bcin01g01380	266	yes	no	HpcH/HpaI aldolase/citrate lyase family	0	0	100	100	0	0	0	0	0	0	205	204	0	0	Loss	Inversion	2.94756	2.32042	4.6197	3,85d	0.846739	2.91627
Bcin01g01390	655	yes	no	Fungal specific transcription factor (GAL4-like Zn2Cys6 )	0	0	100	100	0	0	0	0	0	0	640	639	0	0	Loss	Inversion	12.1195	14.1724	8.71659	12.4765	23.6139	14.2198
Bcin01g01400	278	yes	no	Alpha/beta hydrolase family	0	0	100	100	0	0	0	0	0	0	279	278	0	0	Loss	Inversion	2.71757	48.412	41.1284	16.6315	3.29145	22.4362
Bcin01g01410	404	yes	no	Aspartate aminotransferase	0	0	100	100	0	0	0	0	0	0	405	404	0	0	Loss	Inversion	0.257603	25.564	25.5256	8.94302	2.6806	12.5942
Bcin01g01450	1486	yes	no	Pleiotropic Drug Resistance (PDR) ABC transporter	0	0	100	100	0	100	0	0	0	0	1450	1449	0	1487	Unique	Inversion border	0.999326	2.43252	0.038842	0.156986	0.0919994	0.743935
Bcin01g01460	558	n.a.	no	Hypothetical	0	0	100	100	100	100	0	0	0	0	559	558	558	559	Loss	Inversion border	1.14678	0.507354	0.849366	1.22424	0.711396	0.887827
Bcin01g01470	300	n.a.	yes	Hypothetical	0	0	100	100	20	0	0	0	0	0	298	299	0	0	Unique	Inversion border	0.27397	0.060308	0	0.179439	0	0.102743
Bcin01g03560	246	yes	no	Ada_Zn binding methyltransferase	0	0	100	100	100	0	0	0	0	0	247	246	244	0	Loss		0	0.0656643	0	0	0.077492	0.0286313
Bcin01g03890	322	n.a.	no	Hypothetical (DUF3632)	0	0	0	0	100	100	0	0	0	0	0	0	322	323	Loss	AT-rich region	83.5197	1.8288	1.86562	19.536	84.4584	38.2417
Bcin01g03900	87	n.a.	yes	Hypothetical	0	0	0	0	0	0	0	0	0	0	0	0	87	0	Loss	AT-rich region	441.042	0	0	3.70143	0.509127	89.0505
Bcin01g03910.2	66	n.a.	yes	Hypothetical	0	0	0	0	0	0	0	0	0	0	0	0	116	0	Loss	AT-rich region	251.893	0	0.0899428	5.06307	0.411958	51.4915
Bcin01g04420	560	yes	no	AMP-binding enzyme	15	15	100	100	100	100	0	0	0	0	560	560	560	542	Loss		6.28222	0.229322	0.643475	15.6347	0.0926812	4.57649
Bcin01g05040	126	n.a.	no	Hypothetical	100	100	100	100	100	100	0	0	0	0	127	126	0	0	Unique		6.66792	133.251	8.74449	15.4786	30.9898	39.0264
Bcin01g05870	347	yes	no	NAD dependent epimerase/dehydratase	0	0	100	100	0	0	0	0	0	0	348	347	0	0	Unique		0.121855	0.0495334	0	0	0.0408257	0.0424427
Bcin01g05880	356	yes	no	Atypical short chain dehydrogenase/reductase	25	30	100	100	0	0	0	0	0	0	357	356	0	0	Unique		0.334408	6.12114	0.539791	0.173051	5.46572	2.52682
Bcin01g08060	107	n.a.	no	Hypothetical	100	100	100	100	100	100	0	0	0	0	0	0	0	0	Loss		1.43279	2.55288	0	0.546572	3.12526	1.5315
Bcin01g09290	467	n.a.	no	Hypothetical	0	0	100	100	100	100	0	0	0	0	556	517	428	0	Loss		0.311763	0	0.0625743	0.111781	0.0170782	0.100639
Bcin01g10270	457	yes	no	Glycosyltransferase family 31 protein	40	45	100	100	100	100	0	0	0	0	373	372	457	458	Loss		1.28518	6.12987	3.66747	0.608003	0.0427542	2.34666
Bcin01g10370	225	n.a.	no	Hypothetical (NUT protein family)	100	100	100	100	0	100	0	226	225	225	226	225	0	226	Loss		0.0500729	0	0.233202	0.0694313	0	0.0705413
Bcin01g10790	188	n.a.	no	Hypothetical	0	100	100	100	100	100	0	162	0	188	0	0	174	189	Loss		25.443	1.01915	0	5.77628	472.863	101.02
Bcin01g11440	237	no	no	Tannase and feruloyl esterase	0	0	100	100	70	20	0	0	0	0	160	159	0	0	Unique		0	0	0.103291	0.101702	0	0.0409986
Bcin02g00002	185	n.a.	no	Hypothetical	0	0	0	100	0	0	0	0	0	0	0	0	0	0	Unique		7.27859	0.118118	0.178466	1.65932	1.131	2.0731
Bcin02g00003	179	n.a.	no	Hypothetical	0	0	0	100	0	0	0	0	0	0	0	179	0	0	Unique		0	2.0152	0	0	336.008	67.6046
Bcin02g00004	247	n.a.	no	Hypothetical	0	0	0	100	0	0	0	0	0	0	0	247	0	0	Unique		0.356436	1.31546	0.486465	0.576492	11.3668	2.82034
Bcin02g00005	1029	n.a.	no	Hypothetical	0	0	0	75	0	0	0	0	0	0	0	648	0	0	Unique		11.0349	11.184	50.3657	35.2202	12.4716	24.0553
Bcin02g00006	428	n.a.	no	Hypothetical	0	0	0	100	0	0	0	0	0	0	0	348	0	0	Unique		2.47956	0.94231	6.45807	3.03417	9.17339	4.4175
Bcin02g00007	627	n.a.	no	Hypothetical	0	0	0	100	0	0	0	0	0	0	0	648	0	0	Unique		33.3446	10.2675	32.2521	42.7527	323.059	88.3353
Bcin02g00008	1233	n.a.	no	Hypothetical	0	0	0	70	0	0	0	0	0	0	0	498	0	0	Unique		2.50823	2.15777	3.37293	4.06136	16.4332	5.7067
Bcin02g00010	471	n.a.	no	Hypothetical	50	50	65	100	0	50	0	0	0	0	0	471	0	0	Unique		0.0453952	0.648883	0.3195	0.316085	11.9107	2.64812
Bcin02g00011	1480	n.a.	no	Hypothetical	0	0	30	75	0	0	0	0	0	0	0	1034	0	0	Unique		0.0128145	0.0247237	0.0407304	0.0401041	4.74542	0.972759
Bcin02g00012	118	n.a.	no	Hypothetical	0	0	60	70	0	0	0	0	0	0	0	0	0	0	Unique		0.160522	0.065881	0	0.0980102	79.4141	15.9477
Bcin02g00013	447	yes	no	Salicylate_1-monooxygenase	0	0	0	100	0	0	0	0	0	0	0	447	0	0	Unique		614.859	1.37442	163.932	981.771	3.17436	353.022
Bcin02g00014	384	n.a.	no	Enoylreductase	0	0	0	100	0	0	0	0	0	0	0	384	0	0	Loss		63.7284	0.242061	0.235019	56.7807	0.041447	24.2055
Bcin02g00015	69	n.a.	no	Hypothetical	0	0	0	100	0	0	0	0	0	0	0	0	0	0	Unique		110.907	0.436347	0.39512	62.2472	0	34.7971
Bcin02g00016	931	yes	no	Acyl-CoA synthetase (AMP-forming)/AMP-acid ligase II (NRPS)	0	0	0	100	0	0	0	0	0	0	0	931	0	0	Loss		556.634	0.817692	0.0647228	193.02	0.165415	150.14
Bcin02g00018	360	yes	yes	Intradiol dioxygenase supgroup	0	0	100	100	0	50	0	0	0	0	361	360	0	170	Loss		0.182536	0.0461327	0	0	0.606641	0.167062
Bcin02g00020	591	yes	no	HET protein	0	0	100	100	45	100	0	0	0	0	555	554	0	540	Loss		13.446	4.85248	1.13425	4.7201	26.4546	10.1215
Bcin02g00030	813	yes	no	Fungal specific transcription factor (GAL4-like Zn2Cys6 )	0	0	100	100	0	100	0	0	0	0	728	709	0	814	Loss		8.89806	2.12757	0.0750269	1.67165	44.2139	11.3972
Bcin02g00040	514	yes	no	MFS (D-galactonate) transporter	0	0	100	100	0	100	0	0	0	0	370	369	0	515	Loss		0.233078	0.56879	0	0.219947	1.03561	0.411485
Bcin02g00050	479	yes	no	Glycosyl Hydrolase Family 88	0	0	100	100	10	100	0	0	0	0	472	471	0	480	Loss		0.666922	2.17751	0.0628351	0	4.42992	1.46744
Bcin02g00060	480	yes	no	Glycosyl Hydrolase Family 28	0	0	100	100	75	100	0	0	0	0	481	480	404	481	Loss		3.49548	5.40389	0.0627044	0.321637	6.21679	3.1001
Bcin02g00450	138	n.a.	no	Hypothetical	100	100	100	100	100	100	0	0	0	0	136	135	288	0	Loss		0	0.263423	0	0	0	0.0526847
Bcin02g01040	426	yes	no	DnaJ domain protein	0	0	100	100	0	100	0	0	0	0	428	427	426	427	Loss		2.73074	1.1535	1.05951	0.836233	55.1862	12.1932
Bcin02g01050	369	yes	no	Octopine dehydrogenase superfamily	0	0	100	100	0	100	0	0	0	0	260	259	0	0	Unique		0	0	0	0	0.0222479	0.00444957
Bcin02g01410	118	n.a.	no	Hypothetical	25	25	100	100	0	100	0	0	0	0	0	0	0	0	Unique		0	0	1.26726	0.650031	4.32913	1.24929
Bcin02g01880	314	yes	no	Triphenylmethane reductase (TMR)-like	40	45	100	100	100	100	0	543	314	314	315	314	314	315	Loss		0.127583	11.644	0.670241	0.909988	0.0744571	2.68525
Bcin02g02130	249	n.a.	no	Hypothetical	0	0	100	100	0	100	0	0	0	0	250	249	0	130	Loss		0.0454675	2.8371	0	0.118788	0.415355	0.683342
Bcin02g05770	778	yes	no	Ankyrin repeats protein	0	0	100	100	90	100	0	0	0	0	779	778	631	799	Loss		0.182954	0.120778	0.0377482	0.260175	27.6161	5.64354
Bcin02g06690	539	yes	no	Cytochrome P450	50	50	100	100	100	100	0	298	539	539	540	523	540	540	Loss		51.4594	1.50792	1.44131	11.9757	2.65539	13.8079
Bcin02g07180	284	yes	no	N-Acyltransferase superfamily	35	35	100	100	100	100	0	0	0	0	285	284	0	285	Loss		0.216106	0.128477	0	0.460465	0.057729	0.172555
Bcin02g07270	1393	yes	no	WD40 repeats protein	60	60	100	100	100	100	0	177	0	0	0	0	0	0	Loss		1.88625	0.353333	0.0432723	1.64088	2.61729	1.3082
Bcin02g07530	77	n.a.	no	Ubiquitin-like domain	0	0	100	100	0	35	0	0	0	0	0	0	0	0	Loss		0	0	0	0	0.135533	0.0271067
Bcin02g07750	1867	n.a.	no	Hypothetical	0	0	0	100	100	100	0	0	0	0	0	1867	1867	1837	Loss		0.0121701	0.0106863	0	0	0.314873	0.067546
Bcin02g09360	119	n.a.	no	Hypothetical	0	0	100	100	0	100	0	0	0	0	0	0	0	0	Unique	End of chromosome	0.3073	1.25341	0	0	0	0.312141
Bcin02g09380	400	yes	yes	Sugar lactone lactonase YvrE like	0	100	100	100	0	100	0	401	400	400	401	400	0	401	Loss	End of chromosome	1.5775	29.4068	1.053	1.11615	0.475624	6.72581
Bcin02g09390	374	yes	no	Fungal specific transcription factor (GAL4-like Zn2Cys6 )	0	0	0	100	0	100	0	0	0	0	0	347	0	392	Loss	End of chromosome	6.11906	8.40222	2.20209	9.66946	0.946218	5.46781
Bcin02g09400	293	yes	no	RTA1 like membrane protein	0	0	0	100	0	100	0	0	0	0	0	0	0	294	Loss	End of chromosome	24.0864	1.20043	0	1.68687	0.0822749	5.41119
Bcin02g09410	229	n.a.	no	Hypothetical	0	0	0	100	0	100	0	0	0	0	0	229	0	396	Loss	End of chromosome	0.291355	1.08563	0	0	0	0.275397
Bcin03g00030	331	yes	no	Retinol-DH_like short chain dehydrogenase	0	0	100	100	0	100	0	0	0	0	332	445	0	0	Unique	End of chromosome	0.213215	0	0	1.15985	0.974983	0.46961
Bcin03g00040	308	n.a.	no	Hypothetical (DUF3425)	0	0	100	100	0	0	0	0	0	0	0	0	0	0	Unique	End of chromosome	0.589877	0.313783	0.60931	1.94647	1.70982	1.03385
Bcin03g00960	260	yes	no	GTP cyclohydrolase I FolE	0	0	100	100	100	100	0	0	0	0	184	222	0	183	Loss		0.698913	0.204099	0	0	98.689	19.9184
Bcin03g00970	111	n.a.	no	Hypothetical	0	0	100	100	100	100	0	0	0	0	126	111	0	0	Unique		0	0.544417	0	0	0.35368	0.179619
Bcin03g01810	107	n.a.	no	Hypothetical	0	0	100	100	90	100	0	0	0	0	97	106	0	0	Loss		6.80872	0.583276	0	0.491306	2.44865	2.06639
Bcin03g02610	134	n.a.	no	Hypothetical	100	100	100	100	80	100	0	0	0	0	0	0	0	0	Loss		0.48605	0.369393	0.247897	0.244086	1.82593	0.634672
Bcin03g02990	107	n.a.	no	Hypothetical	85	85	100	100	100	100	0	0	0	0	0	0	145	0	Loss		0.690869	2.52269	0.322002	0.542003	3.21633	1.45878
Bcin03g03410	2462	n.a.	no	Hypothetical	55	55	100	100	100	100	0	653	0	0	2984	2983	2462	2985	Loss		0.307532	0.548789	0.414439	0.57275	8.56254	2.08121
Bcin03g03530	721	yes	no	Fungal specific transcription factor (GAL4-like Zn2Cys6 )	5	0	100	100	100	100	0	679	0	0	679	711	662	494	Loss		0.714462	0.209233	0.172348	0.204243	11.8249	2.62504
Bcin03g03540	660	n.a.	yes	Hypothetical	0	0	100	100	100	100	0	0	0	0	661	660	660	661	Loss		1.15473	0.201388	0.319404	0.405416	18.3893	4.09406
Bcin03g04380	165	yes	no	EthD domain containing protein	0	0	100	100	0	100	0	0	0	0	166	165	0	166	Loss		2.16126	24.0196	1.09015	3.1912	1647.79	335.65
Bcin03g04390	431	yes	no	Dipeptidyl aminopeptidase like	0	0	100	100	100	100	0	0	0	0	432	431	393	224	Loss		0.119471	0.339036	0	0.0687432	11.1482	2.3351
Bcin03g04400	577	yes	no	MFS transporter, multidrug resistance	0	0	100	100	100	100	0	0	0	0	555	554	392	578	Loss		0.092893	0.275819	0	0.107017	26.1608	5.3273
Bcin03g04410	405	n.a.	no	Hypothetical	0	0	100	100	55	0	0	0	0	0	207	206	0	0	Loss		0.0351832	0.0901868	0	0	15.3397	3.09302
Bcin03g04420	374	n.a.	no	Hypothetical	50	0	100	100	85	100	0	0	0	0	358	357	284	0	Loss		0.0190458	0.843191	0	0	32.0082	6.57409
Bcin03g06650	153	n.a.	no	Hypothetical	100	100	100	100	0	100	0	0	153	153	158	157	0	0	Loss		1.32561	0.92958	0	0.618917	0.404538	0.65573
Bcin03g08420	263	n.a.	no	Hypothetical	100	100	100	100	100	100	0	0	0	0	0	0	0	0	Loss	AT-rich region	0.0761151	0.151227	0	0	0.120414	0.0695512
Bcin03g09310	655	n.a.	yes	Hypothetical	0	0	100	100	100	100	0	0	0	0	656	655	654	656	Loss		2.07495	4.66323	27.3562	8.53208	1.45303	8.81591
Bcin04g00010	282	yes	no	Helo_like_N domain containing protein	0	0	100	100	65	100	0	0	0	0	286	282	0	284	Loss		50.1341	0.388154	11.4036	38.1838	69.7579	33.9735
Bcin04g00020	935	yes	no	TRP repeats protein	32	32	100	100	80	100	0	0	0	0	895	934	0	519	Loss		8.59964	0.124427	1.41782	4.17142	6.29537	4.12174
Bcin04g00650	474	n.a.	no	Hypothetical	0	0	100	100	100	100	0	0	0	0	475	474	474	474	Loss		0	0	0	0	0	0
Bcin04g00670	122	n.a.	no	Hypothetical	0	0	100	100	0	100	0	0	0	0	0	0	0	0	Loss		10.8366	0	0.464807	2.65733	0.905131	2.97278
Bcin04g00680	294	n.a.	no	Hypothetical	0	0	100	100	0	45	0	0	0	0	171	0	0	0	Unique		0.130859	0	0	0	0	0.0261718
Bcin04g00690	235	n.a.	no	Hypothetical	0	0	100	100	0	100	0	0	0	0	0	231	0	224	Unique		0.0302635	0	0	0	0	0.0060527
Bcin04g00700	325	n.a.	no	Hypothetical	0	0	100	100	0	100	0	0	0	0	0	134	0	181	Unique		4.32237	0.061233	0.740143	1.29659	0.749765	1.43402
Bcin04g00710	300	n.a.	no	Hypothetical	20	20	100	100	0	100	0	0	0	0	0	0	0	0	Unique		21.602	0	2.81242	9.14782	3.56452	7.42536
Bcin04g00720	503	no	no	Alpha-beta hydrolase family	0	0	100	100	0	100	0	0	0	0	1098	1348	0	866	Unique		6.65596	0.039607	0.239372	1.28816	1.27325	1.89927
Bcin04g00730	454	no	no	TRP repeats protein	0	0	100	100	0	100	0	0	0	0	0	1348	0	0	Unique		9.26892	0	0.331438	2.41959	0.307347	2.46546
Bcin04g00740	1298	yes	no	HET protein, many ankyrin repeats	40	30	100	100	100	100	0	0	0	1298	1164	1036	0	786	Loss		5.03242	0.115297	0.626899	2.62297	1.80122	2.03976
Bcin04g00790	1284	yes	no	WD40 repeats protein	0	35	100	100	100	100	0	190	0	0	1016	0	1068	1013	Loss		13.171	1.13872	0.81255	4.33606	6.78807	5.24928
Bcin04g00800	1343	yes	no	Ankyrin repeats protein/ NACHT domain	100	80	100	100	0	100	0	0	0	0	0	1469	0	0	Loss		18.2661	0.301835	15.3383	22.5684	14.414	14.1777
Bcin04g00810	365	n.a.	no	Hypothetical	0	0	100	100	85	100	0	0	0	0	0	1469	0	366	Loss		27.8718	0.247417	0.720657	14.3496	8.76236	10.3904
Bcin04g00850	89	n.a.	no	Hypothetical	0	0	100	100	0	100	0	0	0	0	90	0	0	90	Loss		1.91023	0	0.33512	1.31987	1029.77	206.667
Bcin04g00860	675	yes	no	Peptidase C13 family	0	0	100	100	100	100	0	0	0	0	676	675	0	673	Loss		1.2562	0.556167	0	1.12588	156.169	31.8215
Bcin04g00870	1252	yes	no	CHAT domain peptidase-like protein containing tetratricopeptide repeats	5	5	100	100	45	100	0	0	0	0	1331	1249	0	863	Loss		4.40827	0.521793	0	1.06468	1.64742	1.52843
Bcin04g00880	125	n.a.	no	Hypothetical	0	0	100	100	0	100	0	0	0	0	0	200	0	0	Unique		3.79838	1.31012	0	1.59037	3.24804	1.98938
Bcin04g00920	1023	yes	no	WD40 repeats protein	0	0	100	100	100	100	0	0	0	0	663	1441	1071	792	Loss		8.77766	0.718273	0.67744	3.21662	1.30523	2.91904
Bcin04g00930	1263	yes	no	HET protein, many ankyrin repeats	0	100	100	100	100	100	0	948	1263	1263	0	1087	0	679	Loss		3.37702	0.168485	0.548813	2.88903	3.04619	2.00591
Bcin04g00940	1186	yes	yes	NACHT domain, tetratricopeptide repeat protein	0	85	100	100	0	100	0	553	1186	1186	1178	1009	626	963	Loss		5.35436	0.171152	0.157772	1.79437	0.812736	1.65808
Bcin04g01090	1226	yes	no	Ankyrin repeats domain/ CorA like Mg transporter protein	0	0	100	100	0	100	0	0	0	0	561	599	0	560	Unique		3.70859	0.426222	1.78772	3.56427	0.700643	2.03749
Bcin04g01970	178	n.a.	no	Hypothetical	100	100	100	100	0	40	0	0	0	0	0	878	0	0	Loss		2.15414	0.116461	0.210915	0.753548	1.84123	1.01526
Bcin04g02630	262	n.a.	no	Hypothetical	40	40	100	100	0	100	0	0	0	0	263	262	0	0	Loss		0.43549	0.291026	0.11468	0.225833	1.22453	0.458312
Bcin04g02640	405	n.a.	no	Hypothetical	0	0	100	100	15	100	0	0	0	0	406	405	0	406	Loss		2.50414	5.88491	0.297151	1.07349	13.0966	4.57125
Bcin04g02820	47	n.a.	no	Hypothetical	80	80	100	100	50	50	0	0	0	0	0	0	0	0	Loss		1.31875	1.20378	0.213907	0.720109	0.445852	0.780481
Bcin04g03290	606	yes	no	Nucleotide-binding domain of HSPA12 and similar proteins	0	0	100	100	100	100	0	0	0	0	501	500	615	607	Loss		0.0566371	5.30238	0.29813	0	0.164512	1.16433
Bcin04g04750	225	no	no	4-hydroxyphenylacetate permease	35	35	80	100	100	100	0	0	0	0	100	99	511	0	Loss		0.0632052	0.0883272	0	0.394209	10.0766	2.12446
Bcin04g06160	276	n.a.	no	Hypothetical	100	100	100	100	0	100	0	0	0	0	0	1234	0	0	Loss		6.55456	44.8277	7.77479	8.81923	12.9472	16.1847
Bcin04g06630	94	n.a.	yes	Hypothetical	0	0	100	100	100	100	0	0	0	0	95	84	94	96	Loss		2.56556	5.62571	0	104.452	7.15002	23.9586
Bcin04g06910	171	n.a.	yes	Hypothetical	45	45	100	100	80	100	0	0	0	0	172	171	0	172	Loss	End of chromosome	0.407677	14.9834	0	2.07189	0	3.49258
Bcin04g06920	553	yes	yes	Carboxylesterase (esterases and lipases)	0	0	100	100	0	100	0	0	0	0	554	553	0	554	Loss	End of chromosome	0.728791	0	0	0.300442	0.559301	0.317707
Bcin04g06930	214	yes	no	NADPH-dependent FMN reductase	0	0	100	100	0	100	0	0	0	0	215	214	0	215	Loss	End of chromosome	10.0962	112.514	63.5482	57.9581	0.114811	48.8463
Bcin04g06970	250	no	no	Cytochrome P450	0	0	100	100	0	0	0	0	0	0	209	208	0	0	Unique	End of chromosome	0	0.0783846	0.47373	0.0705218	0.0621682	0.136961
Bcin04g06980	214	no	yes	FAD-dependent oxidoreductase	0	0	100	100	0	0	0	0	0	0	187	186	0	0	Unique	End of chromosome	0	0	0	0	0	0
Bcin05g00004	112	n.a.	no	Hypothetical	0	0	60	75	0	0	0	0	0	0	0	0	0	0	Unique	End of chromosome	0.255658	0	0	0.0999902	53.5157	10.7743
Bcin05g00005	211	n.a.	no	Hypothetical	0	0	100	100	0	0	0	0	0	0	0	0	0	0	Unique	End of chromosome	ND	ND	ND	ND	ND	5
Bcin05g00008	438	n.a.	no	Hypothetical	0	0	0	0	0	0	0	0	0	0	0	0	0	0	Unique	End of chromosome	44.3755	70.3405	401.022	69.472	1.19936	117.282
Bcin05g00010	344	yes	no	Aldo-keto reductase	0	0	100	100	0	100	0	0	0	0	159	344	338	345	Loss	End of chromosome	773.044	3.9947	48.0825	103.793	3.085	186.4
Bcin05g00020	419	yes	no	Fungal specific transcription factor (GAL4-like Zn2Cys6 )	0	0	100	100	0	100	0	0	0	0	368	367	0	368	Loss	End of chromosome	28.1418	0.877518	1.72113	4.72777	8.2447	8.74258
Bcin05g00030	131	n.a.	no	Hypothetical	0	0	100	100	0	100	0	0	0	0	132	131	0	0	Loss	End of chromosome	226.62	0.126166	0	1.93588	0.408241	45.818
Bcin05g00040	363	n.a.	yes	Hypothetical (DUF3500)	0	0	100	100	0	100	0	0	0	0	331	330	0	364	Loss	End of chromosome	0.0907873	0	0	0	0	0.0181575
Bcin05g00740	535	yes	no	Carboxylesterase (esterases and lipases)	10	10	100	100	70	100	0	0	0	0	536	535	424	536	Loss		0.404122	0.944041	0.787783	0.288633	0.98296	0.681508
Bcin05g01320	222	no	no	HeLo region containing protein	100	100	100	100	40	100	0	628	0	0	181	222	0	122	Loss		0.363398	0.164197	0.13525	0.693755	0.700435	0.411407
Bcin05g02690	157	n.a.	yes	Hypothetical	100	70	100	100	65	100	0	125	157	157	158	157	152	130	Loss		0.0749121	0	0	0.187956	0	0.0525737
Bcin05g03360	338	yes	no	Alpha-N-acetylglucosamine transferase	45	50	100	100	0	100	0	0	0	0	0	0	0	339	Loss		0.150862	3.28913	0	4.74886	0.0919431	1.65616
Bcin05g03370	424	yes	yes	Cryptococcal mannosyltransferase 1	80	80	100	100	0	100	0	0	0	0	360	359	0	356	Loss		0.190221	9.31715	0.586461	1.13957	0.44684	2.33605
Bcin05g04020	134	no	no	Enoyl-(Acyl carrier protein) reductase	80	75	100	100	0	100	0	0	0	0	206	0	0	0	Loss		1.58055	2.78536	0.573582	3.06382	5.34529	2.66972
Bcin05g05630	498	yes	no	Cytochrome P450	15	15	100	100	75	100	0	0	0	0	471	470	510	499	Loss		1.49949	0.0661732	0.21803	1.70132	10.5218	2.80136
Bcin05g06180	588	n.a.	no	Hypothetical	0	0	100	100	0	100	0	0	0	0	579	578	0	589	Loss		6.78941	4.22168	4.19896	4.67172	12.7391	6.52417
Bcin05g06190	724	yes	no	Fungal specific transcription factor (GAL4-like Zn2Cys6 )	0	0	100	100	0	100	0	0	0	0	0	0	0	728	Loss		2.62207	4.39374	1.12323	2.23786	5.55153	3.18569
Bcin05g06200	370	yes	no	Medium chain reductase/dehydrogenase (Zn-dependent)	0	0	100	100	0	100	0	0	0	0	371	370	0	371	Loss		1.40897	6.79243	0.650368	1.30322	10.7896	4.18891
Bcin05g06230	241	no	no	NACHT_NTPase and P-loop NTPases like	0	0	90	100	90	90	0	0	0	0	1025	1042	144	1039	Loss		0.626022	0	0	0.247094	1.2896	0.432544
Bcin05g06660	228	n.a.	no	Hypothetical	70	65	100	100	100	100	0	0	0	0	229	228	228	163	Loss		4.07687	6.57012	0.658533	4.68705	8.77615	4.95374
Bcin05g07080	218	n.a.	no	Hypothetical	0	0	100	100	100	0	0	0	0	0	0	0	1577	0	Loss		0.343326	0.698165	0.149475	0.157456	1.0931	0.488304
Bcin05g08100	224	n.a.	no	Hypothetical	35	30	100	100	35	100	0	0	0	0	92	91	0	100	Loss		0.0662469	0.446909	0	0.33243	0	0.169117
Bcin05g08190	443	yes	no	Salicylate 1-monooxygenase	0	0	100	100	100	100	0	444	443	443	444	443	443	444	Loss		5.06316	1.43176	3.39649	10.3907	3.51781	4.75999
Bcin05g08200	433	n.a.	no	Hypothetical (COG4913)	0	0	100	100	100	100	0	224	433	433	434	433	479	475	Loss		4.30043	0.685546	7.31475	5.07376	2.14059	3.90301
Bcin05g08400	2571	yes	no	Polyketide synthase	0	0	100	100	0	0	0	0	0	0	0	0	0	0	Loss	End of chromosome	57.7111	0.0297588	0.175899	16.8958	0.0238071	14.9673
Bcin05g08410	324	n.a.	no	Hypothetical	0	0	90	100	0	0	0	0	0	0	0	0	0	0	Unique	End of chromosome	0.0384016	0	0	0	17.7651	3.56069
Bcin05g08420	1067	n.a.	no	Hypothetical	0	0	45	80	0	0	0	0	0	0	0	1034	0	0	Unique	End of chromosome	0.00668744	0	0	0.0556125	1.53936	0.320332
Bcin06g00010	167	n.a.	no	Hypothetical	0	0	0	0	0	100	0	0	0	0	0	0	0	481	Unique	Inversion border	0	0.280365	0	0	0.120494	0.0801719
Bcin06g00011	105	n.a.	no	Hypothetical	0	0	0	0	0	0	0	0	0	0	0	0	0	0	Unique	Inversion border	0.269516	0.18832	0	0	0	0.0915673
Bcin06g00022	426	no	no	Fungal specific transcription factor (GAL4-like Zn2Cys6 )	0	0	100	100	0	100	0	0	0	0	187	0	0	503	Loss	Inversion border	1.89161	9.33167	0.847611	2.55572	1.78723	3.28277
Bcin06g00024	285	yes	no	Beta-lactamase superfamily domain protein	0	0	100	100	0	100	0	0	0	0	286	285	0	286	Loss	Inversion border	1.5542	13.4217	3.05827	2.98997	0.112959	4.22743
Bcin06g00026	431	no	no	MFS monocarboxylate transporter	0	0	100	100	0	100	0	0	0	0	432	431	0	432	Loss	Inversion border	0	0.588148	0	0	0	0.11763
Bcin06g00028	539	yes	no	Alkyl sulfatase BDS1 and related hydrolases	0	0	100	100	0	0	0	0	0	0	240	464	0	0	Unique	Inversion border	0.0132263	0.129488	0	0	0.0140947	0.0313618
Bcin06g00170	177	n.a.	yes	Hypothetical	100	100	100	100	100	100	0	0	0	0	0	0	198	161	Loss	AT-rich region	0.0401246	0.112146	0	1.61434	13.6153	3.07638
Bcin06g00210	377	n.a.	no	Hypothetical	0	0	100	100	85	100	0	0	0	0	378	377	508	0	Loss		0.0188947	0.149677	0	0	0	0.0337143
Bcin06g00240	465	n.a.	no	Hypothetical	35	30	100	100	100	100	0	199	0	0	466	324	465	466	Loss		0.0560525	4.36396	0.0647228	0	1.12913	1.12277
Bcin06g00410	514	yes	no	Tannase and feruloyl esterase	20	15	100	100	0	100	0	0	0	0	515	515	0	516	Loss		1.96799	5.38467	2.22546	3.42936	4.52146	3.50579
Bcin06g01370	883	yes	no	Subtilisin-like peptidase S8	0	0	100	100	0	100	0	0	0	0	869	868	0	884	Loss		24.9441	11.6309	19.8911	19.1184	46.1349	24.3439
Bcin06g01380	304	n.a.	no	Hypothetical	0	0	100	100	0	100	0	0	0	0	305	304	0	305	Loss		9.5627	4.99917	6.72438	16.4792	15.5741	10.6679
Bcin06g01390	910	yes	no	WD40 repeats protein	15	15	100	80	0	100	0	0	0	0	947	1114	0	902	Loss		4.14153	1.34077	1.22497	5.67194	8.16326	4.10849
Bcin06g01480	278	n.a.	no	Hypothetical	0	0	0	0	0	0	0	0	0	0	0	0	0	0	Unique		2.87458	0.381862	15.7831	16.9555	0	7.19901
Bcin06g01540	730	no	no	Superfamily II DNA or RNA helicase	0	0	0	0	0	100	0	0	0	0	0	0	0	724	Loss	Inversion border	0.189603	0.0227824	0.123779	0.0406253	0	0.0753579
Bcin06g01550	384	n.a.	no	Hypothetical	0	0	0	0	0	60	0	0	0	0	0	0	0	0	Loss	Inversion border	0.147705	0.0433695	0	0.154672	0	0.0691494
Bcin06g01560	521	n.a.	no	Hypothetical	0	0	0	0	0	0	0	0	0	0	0	0	0	0	Loss	Inversion border	0.152962	0.267907	0.288897	0.63772	0	0.269497
Bcin06g02670	505	yes	no	Cytochrome P450	50	50	100	100	100	20	0	0	0	0	506	505	505	0	Loss		0.0992558	0	0	0.0586899	0.216373	0.0748637
Bcin06g02680	268	n.a.	no	Hypothetical (DUF3328)	0	0	100	100	75	0	0	0	0	0	207	206	225	0	Loss		0.0481494	0.210326	0	0.28756	0.203443	0.149896
Bcin06g03520	134	n.a.	no	Hypothetical	25	25	100	100	100	100	0	0	0	0	135	134	134	136	Loss		0.675774	1.89174	0.669249	0.582392	4.53569	1.67097
Bcin06g03530	427	n.a.	no	Phosphotransferase	0	0	100	100	100	100	0	0	0	0	380	379	239	380	Loss		0.0187952	0.394135	0	0	2.05606	0.493799
Bcin06g04580	412	no	no	Sugar (and other) MFS transporter	0	0	100	100	0	100	0	0	0	0	413	412	0	508	Loss		0.0172934	0	0	0	0.186226	0.0407038
Bcin06g04590	344	yes	no	Formaldehyde dehydrogenase (FDH)-like	0	0	100	100	100	100	0	0	0	0	293	292	319	344	Loss		0.672907	1.04518	0	0.052208	0.507745	0.455608
Bcin06g04600	137	yes	no	Deaminase or endoribonuclease	0	0	100	100	100	100	0	0	0	0	138	137	137	138	Loss		18.0822	1.6887	1.74845	1.8968	0.814714	4.84616
Bcin06g05490	257	no	no	SNF2 family protein	0	0	100	100	90	40	0	0	0	0	278	277	0	0	Loss		0	0	0	0	0	0
Bcin06g05500	155	n.a.	no	Hypothetical	45	45	100	100	0	100	0	0	0	0	159	131	0	0	Loss		0	0.0363606	0	0	0.0149746	0.010267
Bcin06g05540	131	n.a.	yes	Hypothetical	0	0	100	100	100	100	0	0	0	0	288	131	0	266	Loss		0.314553	0.277393	0.685473	0.449956	0.580929	0.461661
Bcin06g05550	422	no	no	Ankyrin repeats protein	0	0	100	100	0	100	0	0	0	0	378	514	0	1131	Loss		1.5017	1.99093	1.06953	1.56425	1.35976	1.49723
Bcin06g06910	632	yes	no	HET protein	0	0	100	100	0	100	0	0	0	0	633	632	0	633	Loss		0.123452	0	0.0952949	0.132031	1.77942	0.426041
Bcin06g06990	315	yes	no	Phenylcoumaran benzylic ether reductase (PCBER) like	0	0	100	100	90	100	0	0	0	0	316	315	315	316	Loss		1.16298	0.0813046	1.39883	0.657592	2.84056	1.22826
Bcin06g07000	539	yes	yes	Tannase, feruloyl esterase	0	0	100	100	0	0	0		0	0	540	539	0	0	Loss		0.0736578	0	0	0.0665169	0.133002	0.0546353
Bcin06g07010	237	yes	yes	Cutinase	25	25	100	100	75	30	0	238	237	237	238	237	229	238	Loss		0.0797407	0.489343	0.126726	0.150921	0.0649193	0.18233
Bcin06g07590	1216	yes	yes	Glycosyl hydrolase family 71	0	0	0	0	0	0	0	0	0	0	0	0	0	0	Unique	End of chromosome	9.07026	0.106663	0.793054	2.15956	0.692261	2.56436
Bcin06g07600	355	n.a.	no	Hypothetical	0	0	0	0	0	0	0	0	0	0	0	0	0	0	Unique	End of chromosome	24.5991	0	0.508329	4.6742	0	5.95632
Bcin06g07610	440	no	no	Hybrid sensory histidine kinase	0	0	0	0	0	100	0	0	0	0	0	0	0	0	Loss	End of chromosome	12.4989	5.41745	7.47166	7.50523	0.610106	6.70067
Bcin07g00010	440	yes	no	FAD-dependent oxidoreductase	0	0	0	100	0	100	0	0	0	0	0	440	0	441	Loss	End of chromosome	42.7077	0	0	0.0407246	0	8.54968
Bcin07g00020	387	yes	no	Phosphotransferase enzyme family	0	0	50	100	100	100	0	0	0	0	0	387	388	389	Loss	End of chromosome	0	0.102897	0	0	1.83439	0.387458
Bcin07g00030	220	no	no	Oxido reductase	0	0	100	100	0	85	0	0	0	0	135	134	0	0	Loss	End of chromosome	0	0.111519	0	0	0.350169	0.0923376
Bcin07g01500	328	n.a.	no	Hypothetical	0	0	100	100	100	100	0	0	0	0	628	0	446	1232	Loss		0.0843797	0.237227	0	0.0162041	0.534649	0.174492
Bcin07g01780	625	yes	no	Fungal specific transcription factor (GAL4-like Zn2Cys6 )	0	0	0	0	0	0	0	0	0	0	0	0	0	0	Loss		1.0021	3.8446	3.22808	2.21564	3.46491	2.75106
Bcin07g01790	1195	n.a.	no	Hypothetical	0	0	0	0	0	0	0	0	0	0	0	0	0	0	Loss		0.80634	2.01536	2.90008	1.0372	0.892406	1.53028
Bcin07g01840	605	yes	no	Choline dehydrogenase or related flavoprotein	0	0	100	100	45	100	0	0	0	0	606	605	509	595	Loss		3.52141	0.719607	0.348392	5.42764	0.878273	2.17906
Bcin07g01850	139	n.a.	no	Hypothetical	0	0	100	100	0	90	0	0	0	0	98	119	0	117	Loss		0.476012	0	0	0.557692	0.107736	0.228288
Bcin07g02630	283	n.a.	no	Hypothetical	100	100	100	100	55	100	0	0	0	0	205	159	0	0	Loss		0.180607	0.0625199	0	0.182785	0.302367	0.145656
Bcin07g04210	195	n.a.	no	Hypothetical	100	100	100	100	40	85	0	0	0	0	0	0	0	0	Loss	AT-rich region	0.0601576	0.763315	0.0549044	0.510481	2.4622	0.770211
Bcin07g04380	149	n.a.	no	Hypothetical	100	100	100	100	70	100	0	0	0	0	0	0	181	0	Loss		3.55803	8.85929	3.6816	3.73253	5.27524	5.02134
Bcin07g04990	258	yes	no	3-ketoacyl-(acyl-carrier-protein) reductase	0	0	75	75	75	100	0	0	0	0	259	258	263	259	Loss		187.448	0.925317	5.82255	193.778	0.0890422	77.6125
Bcin07g05940	125	n.a.	no	Hypothetical	100	100	100	100	15	100	0	0	0	0	0	0	0	0	Loss		4.06879	10.4083	10.293	4.73064	16.8263	9.26539
Bcin07g06270	171	n.a.	no	Hypothetical	100	100	100	100	0	100	0	0	171	171	172	171	0	137	Loss		0.0415243	0.425766	0.350707	0	0.913469	0.346293
Bcin07g06840	387	n.a.	no	Hypothetical	0	0	100	100	85	100	0	0	0	0	388	387	258	311	Loss		0	0	0	0	0.0211883	0.00423765
Bcin07g06850	361	n.a.	no	Hypothetical	40	40	100	100	85	100	0	394	0	0	321	320	363	362	Loss		0	0.0551435	0.0833172	0.049612	0	0.0376145
Bcin07g07130	515	yes	no	Cytochrome P450	0	0	100	100	0	0	0	0	515	515	427	426	0	0	Loss	End of chromosome	22.0409	0.941945	0.292256	40.762	0	12.8074
Bcin08g00010	522	n.a.	no	Hypothetical	0	0	0	100	0	100	0	0	0	0	0	395	0	586	Loss	End of chromosome	461.575	7.21791	0.980371	8.59816	1.76458	96.0272
Bcin08g00030	223	n.a.	no	Acetyltransferase	0	0	0	100	100	100	0	0	0	0	0	89	255	256	Loss	End of chromosome	1.49514	0	0	0.773989	3.20268	1.09436
Bcin08g00040	125	n.a.	yes	Hypothetical	0	0	0	100	0	60	0	0	0	0	0	125	0	126	Loss	End of chromosome	0	0	0	0	0	0
Bcin08g00050	124	no	no	Multicopper oxidase	0	0	0	100	0	100	0	0	0	0	0	124	0	358	Loss	End of chromosome	0	0	0	0	0	0
Bcin08g00060	618	yes	yes	Glycosyl hydrolase family 43 (beta-D-xylosidase)	0	0	0	100	100	100	0	0	0	0	0	618	592	594	Loss	End of chromosome	577.889	5.3804	15.4358	12.0428	1.58316	122.466
Bcin08g00070	826	yes	no	Glycosyltransferase family 28 (antibiotic biosynthesis)	0	0	100	100	55	100	0	0	0	0	830	829	0	827	Loss	End of chromosome	112.691	2.14522	1.38587	1.45655	8.15033	25.1657
Bcin08g00080	363	no	no	HET protein	0	0	100	100	0	100	0	0	0	0	529	528	0	0	Unique	End of chromosome	3.23106	1.1988	1.40323	1.22229	0.11902	1.43488
Bcin08g00110	303	yes	no	MhpC-like carboxylesterase	0	0	100	100	100	100	0	0	0	0	304	303	303	304	Loss	End of chromosome	10.9847	27.2251	0.396853	0.704282	9.26779	9.71575
Bcin08g00290	2129	yes	no	Polyketide synthase	0	0	100	100	100	0	0	0	0	0	2130	2129	0	0	Loss		0.2517	0.0187436	0.04248	0.304141	2.48934	0.621281
Bcin08g00300	250	yes	no	Glutathione S-transferase, C-terminal domain	100	100	100	100	100	0	0	0	0	0	251	250	0	0	Loss	AT-rich region	11.4352	0.238589	0.720976	2.77645	266.768	56.3878
Bcin08g00310	369	n.a.	no	Hypothetical	0	0	100	100	0	0	0	0	0	0	368	367	0	0	Loss		2.65596	0.782446	0.733642	1.2712	123.751	25.8388
Bcin08g00320	520	yes	no	Cytochrome P450	0	0	100	100	0	0	0	0	0	0	306	305	0	0	Loss		1.84187	1.19116	0.0559224	0.640298	24.6828	5.68241
Bcin08g00330	534	n.a.	no	Hypothetical	0	0	100	100	0	0	0	0	0	0	527	526	0	0	Loss		1.55271	0.783765	0.225502	0.955276	47.6609	10.2356
Bcin08g00340	531	yes	no	MFS transporter, multidrug resistance	0	0	100	100	100	0	0	0	0	0	526	525	0	0	Loss		0.615914	0.0751862	0.2272	0.336891	84.096	17.0702
Bcin08g00930	302	yes	no	Short chain dehydrogenase	0	0	100	100	0	100	0	0	0	0	303	302	0	364	Loss		0.159687	0.241689	3.78255	1.57982	0.105257	1.1738
Bcin08g01060	478	yes	no	FAD/FMN-containing dehydrogenase	0	0	100	100	65	100	0	0	0	0	479	478	474	481	Loss		7.5739	0.701793	0.188899	1.68427	0.714257	2.17262
Bcin08g01770	303	yes	no	Clavaminic acid synthetase (CAS) -like	0	0	100	100	0	100	0	0	0	0	278	277	0	304	Loss		1.87353	0	0.198426	2.91249	0.0504491	1.00698
Bcin08g01780	455	yes	no	MFS transporter, multidrug resistance	0	0	100	100	0	100	0	0	0	0	456	458	0	456	Loss		37.531	3.05132	0.396853	13.1432	6.62512	12.1495
Bcin08g01790	463	yes	no	Phenylacetate-coenzyme A ligase PaaK like protein	0	0	100	100	0	100	0	0	0	0	456	455	0	464	Loss		58.504	1.5854	0.585016	31.8095	8.84983	20.2667
Bcin08g01800	441	yes	no	Pyridoxal 5-phosphate (PLP)-Dependent Enzyme Ornithine Decarboxylase	0	0	100	100	0	100	0	0	441	441	442	441	441	442	Loss		16.8724	0	0	2.88908	0.232404	3.99878
Bcin08g02070	488	yes	no	Xaa-Pro aminopeptidase	10	10	100	100	100	100	0	0	0	0	0	488	488	489	Loss		16.7299	1.12995	1.97371	13.8673	11.4832	9.03682
Bcin08g02180	204	n.a.	no	Hypothetical	0	0	0	100	100	100	0	0	0	0	0	0	0	404	Loss		0	0.560447	0	0	0.122775	0.136644
Bcin08g02200	337	n.a.	no	Hypothetical	0	0	100	100	100	100	0	0	0	0	0	0	0	338	Loss		1.17467	0	0	0.0531348	5.71212	1.38798
Bcin08g03830	258	yes	no	3-ketoacyl-(acyl-carrier-protein) reductase	0	0	100	100	100	100	0	0	0	0	259	258	263	259	Loss		14.7278	0.269975	0	0.114661	0.0905147	3.04059
Bcin08g03840	527	yes	no	Cytochrome P450 (Bcaba2)	0	0	100	100	100	100	0	0	0	0	529	528	527	515	Loss		11.8895	0.397078	0.114246	1.11444	0.0300054	2.70905
Bcin08g03850	509	yes	no	Cytochrome P450 (Bcaba1)	0	0	100	100	100	100	0	0	0	0	510	509	507	508	Loss		0.612383	0.254528	0	0	0.0310435	0.179591
Bcin08g04090	112	n.a.	no	Hypothetical	20	20	100	100	0	20	0	0	112	112	0	0	0	0	Loss		4.15838	1.22563	0.252392	2.1153	6.97391	2.94512
Bcin08g06800	176	n.a.	no	Hypothetical	0	0	100	100	0	100	0	0	0	0	177	176	0	294	Loss		0.139968	0.281127	2.22908	1.84287	0.224046	0.943417
Bcin08g06810	475	n.a.	no	Hypothetical	0	0	100	100	0	0	0	0	0	0	228	475	0	0	Loss		0.467226	0.845926	0.316815	1.47713	0.725464	0.766512
Bcin08g06820	527	n.a.	no	Hypothetical	0	0	100	100	0	0	0	0	0	0	597	596	0	0	Loss		0.390304	0.65546	0.114246	0.146503	0.221989	0.3057
Bcin08g07100	535	n.a.	no	Hypothetical	0	0	100	100	0	55	0	161	0	0	0	473	0	0	Loss	End of chromosome	0	0	0	0	0.171467	0.0342934
Bcin08g07110	948	n.a.	no	Hypothetical	0	0	100	100	0	40	0	0	0	0	765	948	0	158	Loss	End of chromosome	0.00752601	0.0210347	0	0	2.04769	0.415249
Bcin08g07120	353	yes	yes	Intradiol dioxygenase supgroup	0	0	0	0	0	100	0	0	0	0	0	0	0	353	Loss	End of chromosome	1.02165	0	0	0.0838901	0.0651467	0.234137
Bcin08g07140	275	no	no	Metal-dependent hydrolase	0	0	0	0	0	0	0	0	0	0	0	0	0	0	Unique	End of chromosome	0.0258775	0	0	0	0	0.0051755
Bcin09g00020	464	yes	no	Fungal specific transcription factor (GAL4-like Zn2Cys6 )	0	0	100	100	0	100	0	0	0	0	406	405	0	472	Loss	End of chromosome	2.25497	2.4413	0.908068	1.81071	1.79276	1.84156
Bcin09g00030	239	yes	no	NAD(P)H-binding reductase	0	0	100	100	0	100	0	0	0	0	240	239	0	240	Loss	End of chromosome	0.0493171	0.0693912	0	0	0.237849	0.0713114
Bcin09g00040	343	yes	no	Glutamine synthetase	0	0	100	100	0	0	0	0	0	0	448	337	0	0	Loss	End of chromosome	0	0	0	0	0	0
Bcin09g00610	185	n.a.	no	Hypothetical	80	100	100	100	0	100	0	145	185	185	172	171	0	0	Loss		0	0	0	0	0	0
Bcin09g00630	244	n.a.	no	Hypothetical	0	0	90	85	85	0	0	0	0	0	247	256	0	0	Loss		0.0662603	0.0729399	0	0.035776	0	0.0349952
Bcin09g00780	234	n.a.	no	Hypothetical	0	0	100	100	70	100	0	0	0	0	235	234	0	210	Loss		0	0	0	0	0	0
Bcin09g00820	217	yes	no	Glutathione S-transferase	15	15	100	100	0	100	0	0	0	0	218	217	0	218	Loss		1.66288	1.14539	0.691762	0	0.339499	0.767906
Bcin09g00840	541	yes	no	Fungal specific transcription factor (GAL4-like Zn2Cys6 )	0	0	100	100	0	100	0	0	541	541	541	541	0	541	Loss		6.41392	2.10016	4.67437	5.63778	1.48791	4.06283
Bcin09g00850	349	yes	no	Zinc-binding alcohol dehydrogenase	0	0	100	100	0	100	0	0	0	0	375	374	0	334	Loss		0.99972	2.55936	2.49904	1.60041	0.759873	1.68368
Bcin09g00910	308	yes	no	NADPH-dependent alcohol reductase	0	0	100	100	0	100	0	0	0	0	0	308	0	309	Loss	AT-rich region	15.7286	16.5347	1.56173	9.78323	17.3986	12.2014
Bcin09g02710	793	yes	no	GT1_Gtf_like glycosyltransferase	0	0	100	100	100	100	0	0	0	0	782	792	824	794	Loss		1.73055	1.94505	0.0759719	0.232248	0.578353	0.912434
Bcin09g02720	830	yes	yes	Bacterial alpha-L-rhamnosidase like	0	0	100	100	100	100	0	0	0	0	831	830	459	831	Loss		1.34224	0.440624	0	0.142946	0.414003	0.467962
Bcin09g03480	116	no	no	Zinc finger, C2H2 type	85	100	100	100	100	100	0	74	116	116	276	268	247	255	Loss	AT-rich region	29.6724	1.17204	0.268893	8.29072	404.151	88.711
Bcin09g03780	114	n.a.	no	Hypothetical	25	25	100	100	100	100	0	0	0	0	0	0	0	0	Loss		0.218141	1.30064	0	0.889123	0.997427	0.681066
Bcin09g03840	261	yes	no	gag-polypeptide of LTR copia-type	100	100	100	100	100	100	0	0	0	0	0	0	0	264	Loss	AT-rich region	1.70927	16.909	2.93259	2.85541	0.260885	4.93342
Bcin09g05340	750	yes	no	Fungal specific transcription factor (GAL4-like Zn2Cys6 ) (Bcbik5)	0	0	100	100	0	100	0	0	0	0	650	649	0	751	Loss		1.63876	0.63095	1.35048	1.77	3.25682	1.7294
Bcin09g05350	326	yes	no	Triphenylmethane reductase (Bcbik4)	0	0	100	100	100	100	0	0	0	0	327	326	326	327	Loss		0.507092	0.936266	0.830115	1.21867	5.30306	1.73904
Bcin09g05720	176	n.a.	no	Hypothetical	0	0	100	100	35	0	0	0	0	0	519	176	0	0	Loss		0.0403513	0	0.3408	0	0.307679	0.137766
Bcin09g05730	524	n.a.	no	Hypothetical	0	0	100	100	20	0	0	0	0	0	519	421	0	0	Loss		0	0	0.0574492	0.0342087	0.562265	0.130785
Bcin09g06340	263	n.a.	no	Hypothetical	40	40	100	100	0	100	0	0	0	0	0	0	0	0	Loss		0	0.126166	0	0	0	0.0252332
Bcin09g06540	344	yes	no	Xylose isomerase-like	0	0	100	100	100	100	0	0	0	0	345	344	0	345	Loss		3.38988	1.19623	1.31134	2.52455	23.8506	6.45452
Bcin09g06720	189	n.a.	no	Hypothetical	0	0	100	100	0	75	0	0	0	0	78	172	0	0	Unique		0	0	0	0	0	0
Bcin09g06850	671	yes	no	HET protein	5	5	100	100	10	100	0	0	0	0	672	671	0	672	Loss	AT-rich region	1.60797	0.0841931	0.179529	1.47075	0.194317	0.707353
Bcin09g07090	671	yes	no	Alkyl sulfatase BDS1 and related hydrolases	0	0	100	100	0	100	0	0	0	0	655	654	654	633	Loss		1.20916	0.259135	1.47351	9.02787	1.76087	2.74611
Bcin09g07120	444	n.a.	no	Hypothetical	0	0	100	100	90	100	0	0	0	0	445	445	0	446	Loss	End of chromosome	6.14439	0.0822828	1.4911	4.99145	0.261118	2.59407
Bcin09g07130	380	n.a.	no	Hypothetical	0	0	0	100	0	0	0	0	0	0	0	358	0	0	Loss	End of chromosome	682.593	0	0.0766151	266.213	9.09601	191.596
Bcin09g07140	395	n.a.	no	Hypothetical, membrane protein	0	0	0	100	0	0	0	0	0	0	0	390	0	0	Loss	End of chromosome	266.653	0	0	100.175	9.54675	75.2751
Bcin10g00010	348	n.a.	no	Hypothetical	0	0	0	0	0	0	0	0	0	0	0	0	0	0	Unique	End of chromosome	147.781	0	0.172841	47.8738	0.285146	39.2226
Bcin10g00020	572	yes	no	MFS transporter, multidrug resistance	0	0	0	0	0	0	0	0	0	0	0	0	0	0	Unique	End of chromosome	80.8709	0	0	28.041	0.668535	21.9161
Bcin10g00030	143	yes	no	Hypothetical (EthD domain)	0	0	100	100	0	0	0	0	0	0	144	143	0	0	Unique	End of chromosome	6570.23	4.97067	12.1481	3450.71	120.428	2031.7
Bcin10g00040	4053	yes	no	Polyketide synthase/ Nonribosomal peptide synthase (Bcpks7)	0	0	100	50	0	35	0	0	0	0	0	0	0	848	Loss	End of chromosome	9.41745	0.0484522	0.0297591	14.6568	0.108436	4.85018
Bcin10g00050	122	n.a.	no	Hypothetical	0	0	100	100	0	80	0	0	0	0	0	0	0	123	Loss	End of chromosome	13.9283	2.65139	6.37546	33.859	11.0131	13.5654
Bcin10g00060	304	yes	no	NADH-cytochrome b5 reductase (Bcmcr1)	0	0	100	100	0	100	0	305	304	304	0	304	0	305	Loss	End of chromosome	40.8891	149.473	34.2152	171.675	55.3967	90.3298
Bcin10g00070	644	yes	no	DNA repair exonuclease	0	0	15	100	0	100	0	0	0	0	0	613	0	645	Loss	End of chromosome	0.193826	0.07746	0	0.046042	0.0510163	0.0736689
Bcin10g00080	530	n.a.	no	Hypothetical	0	0	100	100	0	100	0	0	0	0	539	546	0	523	Loss	End of chromosome	0.0357407	0.0751862	0	0.123571	0.298669	0.106633
Bcin10g00090	61	n.a.	no	Hypothetical	0	0	80	100	0	80	0	0	0	0	0	119	0	0	Unique	End of chromosome	0	0	0	0.28967	0.380133	0.133961
Bcin10g00140	265	yes	no	3-ketoacyl-(acyl-carrier-protein) reductase	0	0	0	0	0	100	0	0	0	0	0	0	0	259	Loss		36.7645	202.866	39.3451	712.884	0.404452	198.453
Bcin10g00150	288	no	no	ATZ_TRZ-like hydrolase	0	0	0	0	0	100	0	0	0	0	0	0	0	256	Loss		1.85263	59.8926	0.375446	21.0089	0.0160278	16.6291
Bcin10g00160	813	n.a.	no	Hypothetical	0	0	0	100	0	100	0	0	0	0	0	717	0	689	Loss		0	0	0	0	0	0
Bcin10g00170	910	n.a.	no	Hypothetical	0	0	70	100	0	100	0	0	0	0	625	923	0	916	Loss		0.00783994	0.0219121	0	0	0	0.00595041
Bcin10g00180	439	n.a.	no	Hypothetical	0	0	100	100	0	100	0	0	0	0	440	439	0	440	Loss		0.40281	0	0	0.324932	0.199187	0.185386
Bcin10g01010	352	n.a.	no	Hypothetical (DUF3084)	0	0	100	70	0	75	0	0	0	0	380	333	289	402	Loss		0.199096	0.69798	0.170883	0.270009	0.672932	0.40218
Bcin10g02680	572	yes	no	Chromosome segregation protein SMC	50	50	100	100	100	85	0	384	572	572	661	621	604	0	Loss		0.032302	0.0290644	0.0526367	0.0518274	0	0.0331661
Bcin10g02720	176	no	no	Transpeptidase; beta-lactamase class C family	0	0	100	100	0	100	0	0	0	0	424	367	0	348	Loss		0.839767	0.348075	0.100147	0.07912	1.65819	0.60506
Bcin10g02760	279	n.a.	no	Hypothetical	0	0	100	100	100	100	0	0	0	0	282	281	279	0	Loss		0	0.0477178	0	0	0	0.00954356
Bcin10g04460	158	n.a.	no	Hypothetical	0	0	100	100	100	0	0	0	0	0	159	111	0	0	Unique		0.0744409	0	0	0	0	0.0148882
Bcin10g04470	369	yes	no	Fungal specific transcription factor (GAL4-like Zn2Cys6 )	0	0	100	100	100	0	0	0	0	0	370	272	0	0	Loss		0	0	0	0	0	0
Bcin10g04480	1388	n.a.	no	Hypothetical (DUF2075)	0	0	100	100	100	100	0	0	0	0	1158	798	419	0	Loss		11.9433	0.0934553	1.58513	20.9111	0.366363	6.95987
Bcin10g04490	325	n.a.	no	Hypothetical	0	0	100	100	100	100	0	0	0	0	326	325	321	0	Loss		20.0241	0	0.0925179	10.9423	6.88517	7.58881
Bcin10g04500	206	n.a.	no	Hypothetical	0	0	100	100	100	0	0	0	0	0	0	259	0	0	Unique		2.32672	0.104513	1.42119	2.52769	1.15451	1.50692
Bcin10g04510	547	yes	no	DDE superfamily endonuclease	90	100	100	100	15	100	0	0	0	547	171	547	0	0	Loss		9.24722	0.686282	6.49448	7.8828	0.285231	4.9192
Bcin10g04520	298	n.a.	no	Hypothetical	0	0	100	100	0	0	0	0	0	0	299	146	0	0	Loss		0	0	0	0	0.0763659	0.0152732
Bcin10g06160	232	n.a.	no	Hypothetical	0	0	0	0	0	0	0	0	0	0	0	0	0	0	Unique		0.0306532	0	0	0.204535	0	0.0470376
Bcin10g06170	466	n.a.	no	Hypothetical	0	0	0	0	0	0	0	0	0	0	0	0	0	0	Loss		0.0712263	0	0.129168	0.0384573	0	0.0477704
Bcin10g06180	760	n.a.	no	Hypothetical	0	0	40	40	0	0	0	0	0	0	0	91	0	0	Loss		0	0	0	0	0	0
Bcin10g06190	195	n.a.	no	Hypothetical	0	0	100	100	0	0	0	0	0	0	0	0	0	0	Loss		0	0	0	0	0	0
Bcin10g06200	1128	n.a.	no	Hypothetical (Pro-rich, Atrophin-1)	0	0	100	100	75	0	0	0	0	0	298	502	0	0	Unique		0	0.0314479	0	0	0.00663504	0.00761659
Bcin10g06210	299	n.a.	no	Hypothetical	0	0	0	0	0	0	0	0	0	0	0	0	0	0	Loss		0.132584	0	0.100536	0.0598652	0	0.058597
Bcin10g06220	302	n.a.	no	Hypothetical	0	0	0	0	0	0	0	0	0	0	0	0	0	0	Loss		0.256674	0	0.798962	0.494013	0	0.30993
Bcin10g06240	1141	yes	no	Superfamily II DNA or RNA helicase	0	0	100	100	0	0	0	0	0	0	1139	1138	0	0	Loss	End of chromosome	0.021706	0.0145831	0	0.0314528	0.0200943	0.0175672
Bcin10g06250	1480	n.a.	no	Hypothetical	0	0	30	85	0	0	0	0	0	0	0	1034	0	0	Loss	End of chromosome	0.0119183	0.0107237	0.019421	0	2.57143	0.522699
Bcin10g06260	471	n.a.	no	Hypothetical	55	55	65	100	0	55	0	0	0	0	0	471	0	0	Loss	End of chromosome	0.115766	0.57933	0.285254	0.158088	9.19045	2.06578
Bcin10g06270	261	n.a.	no	Hypothetical	75	75	0	100	0	50	0	382	0	0	0	354	0	0	Loss	End of chromosome	0.0272602	0.571647	0.115118	0.181896	1.46385	0.471953
Bcin11g00010	675	yes	yes	Glycosyl hydrolase family 1	0	0	0	0	0	0	0	0	0	0	0	0	0	0	Unique	End of chromosome	1.5404	6.62706	0.275441	0.117738	0.234784	1.75908
Bcin11g00020	494	no	no	Carboxylesterase	0	0	0	100	0	0	0	0	0	0	0	547	0	0	Unique		0.918302	5.21846	0.159394	0.722684	6.10057	2.62388
Bcin11g00030	300	yes	no	Aromatic alcohol reductase	0	0	100	100	0	0	0	0	0	0	301	300	0	0	Unique		0.193635	0	0	0.119333	0.0782998	0.0782536
Bcin11g02460	186	no	no	Enoyl_reductase_like. NADPH-dependent	0	0	100	100	100	100	0	0	0	0	187	186	0	0	Loss		0.0381935	0	0	0	0	0.0076387
Bcin11g03340	54	n.a.	yes	Hypothetical	0	0	100	100	65	50	0	0	0	0	0	0	0	0	Unique		4.28854	17.3813	0.582818	3.39326	24.2559	9.98038
Bcin11g03490	291	n.a.	no	Hypothetical	0	0	100	100	80	80	0	0	0	0	0	0	0	279	Loss		0	0.114068	0	0	1.15784	0.254382
Bcin11g03600	163	no	no	N-Acyltransferase superfamily	30	30	35	100	0	20	0	0	0	0	0	162	0	0	Loss		0.113553	0.244932	0.185036	0	0.342658	0.177236
Bcin11g03790	254	n.a.	no	Hypothetical	0	0	65	100	0	100	0	0	0	0	0	254	0	262	Loss		0.35555	19.3316	0.118278	1.12687	0.366816	4.25983
Bcin11g03800	327	n.a.	no	Hypothetical	0	0	25	100	0	70	0	0	0	0	0	327	0	0	Loss		0.373579	38.1846	1.83907	1.58573	3.15073	9.02675
Bcin11g05380	101	n.a.	no	Hypothetical	100	100	100	100	0	100	0	0	0	0	0	0	0	0	Loss		143.086	70.549	2.15008	12.9701	504.9	146.731
Bcin11g06500	302	n.a.	no	Hypothetical	10	10	0	100	0	0	0	0	0	0	0	303	0	0	Loss	End of chromosome	0	0	0	0	0	0
Bcin11g06510	321	yes	no	Terpene cyclase	0	0	0	100	0	0	0	0	0	0	0	0	0	0	Loss	End of chromosome	22.162	0	0	0.92227	9.50113	6.51708
Bcin11g06520	519	yes	no	Cytochrome P450	0	0	0	100	0	0	0	0	0	0	0	0	0	0	Loss	End of chromosome	30.7178	0.027695	0	1.71932	20.8448	10.6619
Bcin11g06530	569	n.a.	no	Hypothetical	100	100	100	100	0	0	0	921	569	569	0	919	0	0	Loss	End of chromosome	12.6078	2.84246	16.5171	15.1312	3.88976	10.1976
Bcin11g06540	452	yes	no	Alpha beta hydrolase	0	0	0	100	100	100	0	0	0	0	0	428	0	427	Loss	End of chromosome	4.23169	1.94022	0.56244	9.77503	1.15551	3.53298
Bcin11g06550	205	no	no	NmrA-like short chain dehydrogenase	0	0	0	100	0	0	0	0	0	0	0	0	0	0	Loss	End of chromosome	0	0	0.292824	0	0	0.0585647
Bcin12g00020	98	n.a.	no	Hypothetical	0	0	0	100	0	0	0	0	0	0	0	98	0	0	Unique	End of chromosome	0	0	0	0	0	0
Bcin12g00030	318	yes	no	Triphenylmethane reductase (TMR)-like	0	0	0	100	0	100	0	0	0	0	0	318	0	319	Loss	End of chromosome	48.6773	10.6344	1.60732	41.2629	0.361133	20.5086
Bcin12g00040	550	yes	no	Amidase	0	0	0	100	70	100	0	0	0	0	0	550	0	551	Loss	End of chromosome	1.35011	0.489395	0	0.733252	0.761396	0.666831
Bcin12g00050	587	n.a.	yes	Hypothetical	0	0	100	100	100	100	0	0	0	0	1449	1470	1023	1005	Loss	End of chromosome	6.16912	0.0958943	0.359652	0.402181	0.319522	1.46927
Bcin12g01620	111	n.a.	no	Hypothetical	0	0	100	100	100	0	0	0	0	0	110	0	0	0	Loss		3.87508	1.4564	1.07717	2.65783	1.14078	2.04145
Bcin12g04010	252	n.a.	no	Hypothetical	0	0	100	100	100	100	0	0	0	0	253	252	0	0	Loss		0.075013	0.078901	0	0.188366	0.157692	0.0999944
Bcin12g04340	198	n.a.	no	Hypothetical	0	0	0	0	0	0	0	0	0	0	0	0	0	0	Unique		0	0	0.454686	0	0	0.0909372
Bcin12g04350	626	n.a.	no	Hypothetical	0	0	0	0	0	0	0	0	0	0	0	0	0	0	Unique		0	0.0265612	0	0	0	0.00531225
Bcin12g04360	209	n.a.	no	Hypothetical	0	0	0	0	0	0	0	0	0	0	0	0	0	0	Unique		0	0	0	0	0	0
Bcin12g04370	178	n.a.	no	Hypothetical (PHA03325)	0	0	0	0	0	0	0	0	0	0	0	0	0	0	Unique		0	0	0	0	0	0
Bcin12g04920	292	yes	no	Metallophosphatase domain protein	100	100	100	100	100	100	0	214	292	292	285	284	278	158	Loss		0	1.70989	0.397289	0.470812	0.0505045	0.5257
Bcin12g05240	1512	yes	no	Hypothetical (GTPase domain)	0	0	100	100	100	100	0	0	0	0	1494	1493	1423	1509	Loss		2.76098	0.457479	3.70781	3.21477	1.66757	2.36172
Bcin12g05250	247	n.a.	no	Hypothetical	0	0	100	100	40	100	0	0	0	0	347	247	0	0	Loss		1.65838	0.795411	1.04202	1.33828	1.32428	1.23167
Bcin12g05260	449	n.a.	no	Hypothetical	0	0	100	100	0	100	0	0	0	0	666	665	0	666	Loss		0	1.38301	0.0670241	0.0659935	3.11864	0.926934
Bcin12g05270	212	no	no	HET protein	0	0	100	100	0	100	0	0	0	0	666	665	0	666	Loss		0.122631	3.76585	0.849601	0.645326	4.90442	2.05757
Bcin12g05590	572	n.a.	no	Hypothetical	0	0	100	100	0	90	0	0	0	0	830	829	0	454	Loss		0	1.38255	0	0.0518274	0	0.286876
Bcin12g05600	618	n.a.	no	Hypothetical	0	0	100	100	0	70	0	0	0	0	619	618	0	761	Loss		0.0627731	2.4356	0	0	0.0507225	0.50982
Bcin12g05920	606	yes	no	Fungal specific transcription factor (GAL4-like Zn2Cys6 )	0	0	100	100	100	100	0	0	0	0	555	554	606	607	Loss		1.18029	3.20274	0.0496883	0.599671	2.97356	1.60119
Bcin12g05930	269	n.a.	no	Hypothetical (DUF1275)	0	0	100	100	100	100	0	0	0	0	298	297	253	0	Loss		1.21773	5.10391	0	0.188372	2.20652	1.74331
Bcin12g05940	377	yes	no	Metal-dependent hydrolase	0	0	100	100	100	100	0	0	0	0	0	0	377	378	Loss		3.81568	18.4024	0.398953	3.58475	0.571234	5.3546
Bcin12g05950	453	yes	no	NADPH-dependent reductase	0	0	100	100	100	100	0	0	0	0	454	453	453	440	Loss		3.20188	11.6935	0.465035	1.99444	0.563533	3.58367
Bcin12g06380	510	yes	no	Cytochrome P450	0	0	100	100	0	0	0	0	0	0	511	431	0	0	Loss		126.835	0.207879	0.609496	4486.38	0.174061	922.842
Bcin12g06390	399	yes	no	Terpene Cyclase	0	0	100	100	0	0	0	0	0	0	0	436	0	0	Loss		90.1881	0.108714	0.984843	1806.48	0.0648979	379.564
Bcin12g06400	567	yes	no	Cytochrome P450	0	0	100	100	0	0	0	0	0	0	0	0	0	0	Loss		78.9827	2.38679	0.895423	1481.32	1.60219	313.037
Bcin12g06410	545	n.a.	yes	Hypothetical	0	0	100	100	0	0	0	0	0	0	0	545	0	0	Loss		22.9028	1.38264	0.435012	935.762	0.124083	192.121
Bcin12g06420	484	yes	no	Fungal specific transcription factor (GAL4-like Zn2Cys6 )	0	0	100	100	0	0	0	0	0	0	524	515	0	0	Loss		12.9467	2.19599	2.61187	228.811	3.56811	50.0267
Bcin12g06430	317	yes	no	Short chain dehydrogenase	0	0	100	100	0	0	0	0	0	0	0	317	0	0	Loss		238.092	52.4508	9.10516	2255.83	7.23557	512.543
Bcin12g06780	456	n.a.	no	Hypothetical	0	0	100	100	100	100	0	0	0	0	457	456	0	457	Loss	End of chromosome	3.22688	4.9586	2.17792	2.90936	1.34124	2.9228
Bcin12g06790	322	n.a.	no	Hypothetical (PTZ00121)	0	0	100	100	0	25	0	0	0	0	323	326	0	0	Loss	End of chromosome	0	0	0.0933772	0.0556023	0.0239176	0.0345794
Bcin13g00010	518	yes	no	Cytochrome P450	0	0	10	100	0	100	0	0	0	0	0	518	0	519	Loss	End of chromosome	4.17125	0.667045	0.116227	2.83837	0	1.55858
Bcin13g00040	124	n.a.	yes	Hypothetical	0	0	100	100	0	0	0	0	0	0	0	0	0	0	Loss	End of chromosome	1.56252	0.133231	0	0	11.8868	2.7165
Bcin13g00130	309	yes	no	Short chain dehydrogenase	0	0	0	100	0	100	0	0	0	0	0	309	0	310	Loss		4.88663	13.7246	3.01608	7.83117	0.543462	6.00039
Bcin13g00140	358	yes	no	Enoyl_reductase_like, NADP-dependent	0	0	0	100	0	100	0	0	0	0	0	358	0	359	Loss		8.34048	6.11106	1.42823	4.63832	0	4.10362
Bcin13g00160	206	no	no	Enoyl-CoA hydratase	0	0	0	100	0	0	0	0	0	0	0	116	0	0	Unique		0.109825	0	0	0	0	0.021965
Bcin13g00320	105	n.a.	no	Hypothetical	0	0	100	40	45	75	0	0	0	0	0	0	0	0	Unique		2.22893	2.25709	3.60967	3.57672	2.47534	2.82955
Bcin13g00330	114	n.a.	no	Hypothetical	0	0	100	100	100	100	0	0	0	0	0	0	0	0	Unique		0.698613	2.11274	1.31134	2.43847	9.95687	3.30361
Bcin13g01690	50	n.a.	no	Hypothetical	0	0	100	100	50	60	0	0	0	0	0	0	0	0	Unique		0.133045	0.633741	0.106325	0.462629	0.113813	0.289911
Bcin13g01700	51	n.a.	no	Hypothetical	50	50	100	100	0	100	0	0	0	0	0	0	0	0	Unique		0	0.846964	0	0	0.111199	0.191633
Bcin13g01780	65	n.a.	yes	Hypothetical	0	0	100	100	0	100	0	0	0	0	0	0	0	62	Loss		14.8202	0	0.690706	0.340043	0.0941341	3.18901
Bcin13g02210	139	n.a.	yes	Hypothetical	20	20	100	100	70	100	0	0	0	0	140	139	158	140	Loss		0.357109	11.195	0	0	14.9245	5.29532
Bcin13g03120	408	yes	no	Fungal specific transcription factor (GAL4-like Zn2Cys6 )	0	0	100	100	0	100	0	0	0	0	409	408	0	409	Loss		3.68735	7.70112	3.6134	7.27021	1.48171	4.75076
Bcin13g03130	535	n.a.	no	Hypothetical	0	0	100	100	0	100	0	0	0	0	361	360	0	543	Loss		0.0213262	9.20162	0	0.0673905	0.0442181	1.86691
Bcin13g03170	642	yes	yes	Fungal phospholipase B-like	10	10	100	85	0	100	0	0	0	0	641	487	0	643	Loss		0.198892	20.8571	2.9082	0.558618	0	4.90455
Bcin13g03580	95	n.a.	no	Hypothetical	100	100	100	100	85	100	0	0	0	0	0	0	96	0	Loss		2.83774	13.2333	0.359057	2.05556	20.7286	7.84284
Bcin13g03960	726	yes	no	HET protein	100	100	100	100	100	100	0	122	0	0	727	726	0	727	Loss		2.44387	1.60229	2.77961	2.36845	1.46866	2.13257
Bcin13g04320	115	n.a.	no	Hypothetical	0	0	100	100	0	60	0	0	0	0	112	115	0	0	Loss		0.831365	0.172086	0	3.02456	2.52066	1.30973
Bcin13g05880	813	n.a.	no	Hypothetical (DUF4238)	0	0	0	100	0	0	0	0	0	0	0	813	0	0	Loss	End of chromosome	6.03748	0.372053	0.111158	2.87885	6.32423	3.14475
Bcin14g00010	251	yes	no	Short chain dehydrogenase	0	0	100	100	0	0	0	0	0	0	252	251	0	0	Unique	End of chromosome	6.06605	0.0660869	0.957487	0.520763	0	1.52208
Bcin14g00020	1177	yes	no	DNA and/or RNA helicase SF I	0	0	100	100	100	0	0	0	0	0	1178	1171	0	0	Loss	End of chromosome	0.280908	0.534028	0.384051	0.242733	0.300234	0.348391
Bcin14g00030	256	n.a.	no	Hypothetical	0	0	0	100	50	0	0	0	0	0	0	0	0	0	Unique	End of chromosome	0	0.220147	0	0	0	0.0440294
Bcin14g00040	175	n.a.	no	Hypothetical	0	0	100	100	0	0	0	0	0	0	0	0	0	0	Unique	End of chromosome	0	0	0	0	0	0
Bcin14g00050	174	n.a.	no	Hypothetical	0	0	100	100	0	0	0	0	0	0	175	174	0	0	Unique	End of chromosome	0	0	0	0	0	0
Bcin14g00060	541	n.a.	no	Hypothetical	0	0	100	100	0	0	0	0	0	0	558	0	0	0	Loss	End of chromosome	0.0255992	0.0596914	0	0.0321856	0.0708149	0.0376582
Bcin14g00070	232	no	no	Methyl transferase	0	0	100	100	0	0	0	0	0	0	233	232	0	0	Loss	End of chromosome	0	0	0	0	0.0352834	0.00705669
Bcin14g00570	194	yes	yes	Serine hydrolase	0	0	100	100	0	100	0	0	0	0	0	0	0	195	Loss		0.0366266	1.63907	0.154671	0	77.1385	15.7938
Bcin14g00580	566	yes	no	MFS transporter, multidrug resistance	0	0	100	100	0	100	0	0	0	0	567	566	0	567	Loss		0.0480363	1.32054	0.0531937	0	84.3632	17.157
Bcin14g00590	380	n.a.	no	Hypothetical	0	0	100	100	0	100	0	0	0	0	0	0	0	378	Loss		0	3.18697	0	0	92.1558	19.0685
Bcin14g00870	633	yes	no	MFS transporter, multidrug resistance	0	0	100	100	100	100	0	634	633	633	634	574	0	634	Loss		55.8352	261.242	33.3957	137.266	53.1166	108.171
Bcin14g01240	522	yes	no	Cytochrome P450	0	0	100	100	0	100	0	0	0	0	449	448	0	523	Loss		6.8054	7.70867	4.22188	6.18008	25.717	10.1266
Bcin14g01250	142	n.a.	no	Hypothetical (Dabb domain)	0	0	100	100	0	100	0	0	0	0	68	67	0	143	Loss		4.65137	0.116461	0.42183	0.125591	5.37081	2.13721
Bcin14g01260	511	yes	no	Acetyl ornithine aminotransferase family	0	0	100	100	0	100	0	0	0	0	512	511	0	512	Loss		3.56642	0.565662	0.117816	0.33724	4.92453	1.90233
Bcin14g01270.2	524	yes	no	Cytochrome P450	0	0	100	100	0	100	0	0	0	0	445	444	0	525	Loss		1.27938	0.16491	0	0	1.43277	0.575411
Bcin14g01290	2545	yes	no	Polyketide synthase (Bcpks11)	0	0	100	100	0	100	0	0	0	0	2546	2545	0	2546	Loss		4.05862	0.0143817	0.0118464	0.0233284	1.54859	1.13135
Bcin14g01300	4408	yes	no	Nonribosomal peptide synthetase (Bcnrps9)	0	0	100	100	0	100	0	0	0	0	4408	4408	0	4409	Loss		0.999232	0.640142	0.677233	0.479346	2.18741	0.996673
Bcin14g01310	199	no	no	NACHT domain	100	100	100	100	0	20	0	511	0	0	0	0	0	0	Loss		0.235264	0	0	0	0.383413	0.123736
Bcin14g02890	281	n.a.	no	Hypothetical	100	100	100	100	100	100	0	332	281	281	282	281	489	0	Loss		0.041972	0.743465	0.106953	0.274304	1.1073	0.454798
Bcin14g03280	245	n.a.	no	Hypothetical	0	0	100	100	0	0	0	0	0	0	473	447	0	0	Unique		0.0705891	0.0585032	0	0	0	0.0258185
Bcin14g03700	230	yes	no	Acetyltransferase (GNAT) domain	0	0	100	100	100	100	0	0	0	0	231	174	230	231	Loss		0.11214	0.345661	0	0.828282	5.58641	1.3745
Bcin14g03710	360	no	no	Amino acid permease (GABA permease)	0	0	100	100	0	100	0	0	0	0	0	0	539	540	Loss		0	0	0	0	5.62223	1.12445
Bcin14g03720	83	n.a.	no	Hypothetical	0	0	0	100	0	0	0	0	0	0	0	0	0	0	Loss		20.0325	0.381427	0.150303	0.443976	380.862	80.374
Bcin14g03730	454	yes	no	Zinc finger, C2H2 type, containing protein	30	30	0	100	15	0	0	120	0	454	0	0	0	0	Loss		42.3237	0.572405	0	0.860965	213.751	51.5017
Bcin14g03760	504	yes	no	Dehydrogenase (flavoprotein)	0	0	100	100	0	0	0	0	0	0	469	468	485	0	Loss		0	0	0	0.0588061	14.6087	2.93349
Bcin14g04350	474	n.a.	no	Hypothetical	0	0	100	100	0	0	0	0	0	0	475	474	0	0	Unique		15.3724	62.88	19.2676	16.6587	2.34574	23.3049
Bcin14g05290	335	n.a.	no	Hypothetical	10	0	100	100	100	100	0	336	335	335	336	335	190	336	Loss		0	0.108976	0	0	0.0471196	0.0312191
Bcin14g05550	352	n.a.	no	Hypothetical	100	100	100	100	0	0	0	124	352	352	0	835	0	0	Loss	AT-rich region	15.3901	3.12023	8.71503	10.2836	1.94622	7.89104
Bcin14g05560	387	yes	no	Epoxide hydrolase	0	0	0	100	0	100	0	0	0	0	0	387	0	388	Loss		284.621	0.351612	0.621873	25.2013	1.97972	62.5551
Bcin14g05580	499	yes	no	FAD binding domain enzyme	0	0	0	100	0	0	0	0	0	0	0	499	0	0	Unique	End of chromosome	0.195417	0.299543	0	0.0593942	0.0154508	0.113961
Bcin15g00010	447	n.a.	no	Hypothetical (CCDC158)	0	0	0	100	0	0	0	0	0	0	0	447	0	0	Unique	End of chromosome	0.301557	0.208022	0	0.132576	0.0734974	0.14313
Bcin15g00020	221	n.a.	no	Hypothetical (DUF1330)	0	0	100	100	0	0	0	0	0	0	222	221	221	0	Loss	End of chromosome	1.02159	0.0899187	0	0.267541	0	0.27581
Bcin15g00030	188	n.a.	no	Hypothetical (DUF3237)	0	0	100	100	0	0	0	0	0	0	189	188	184	0	Loss	End of chromosome	0.344937	0.633713	0	0.157127	0	0.227155
Bcin15g00040	466	yes	no	MFS transporter, multidrug resistance	0	0	100	100	0	85	0	0	0	0	467	466	0	0	Loss	End of chromosome	0.0943576	0.522403	4.81046	1.04575	0.104145	1.31542
Bcin15g00050	466	yes	no	Transferase family	0	0	100	100	0	100	0	0	0	0	467	466	0	0	Loss	End of chromosome	0.0305875	1.04786	5.48966	1.76752	0.844072	1.83594
Bcin15g00060	243	yes	no	Putative S-transferase (GST-like)	0	0	100	100	100	100	0	0	0	0	244	243	243	245	Loss	End of chromosome	0.352418	0.805021	0.74166	5.36969	0.126178	1.47899
Bcin15g00070	306	yes	no	ABC transporter substrate-binding protein	0	0	100	100	100	100	0	0	0	0	307	306	306	307	Loss	End of chromosome	3.00182	7.03803	1.76839	24.3044	0.305394	7.2836
Bcin15g00080	691	yes	no	Fungal specific transcription factor (GAL4-like Zn2Cys6 )	0	0	100	100	100	100	0	0	0	0	640	639	691	692	Loss	End of chromosome	6.58799	1.61129	0.95887	8.8758	9.14565	5.43592
Bcin15g00090	494	yes	no	D-galactonate MFS transporter	0	0	100	100	100	100	0	0	0	0	495	494	494	489	Loss	End of chromosome	0.135602	0	0	0.158188	0.144824	0.0877227
Bcin15g00530	220	no	no	Cytochrome P450	0	0	100	100	100	100	0	0	0	0	0	0	0	0	Loss		0.618851	0.191125	0	0.286589	6.15448	1.45021
Bcin15g00690	213	n.a.	no	Hypothetical	100	100	100	100	100	100	0	0	213	213	0	251	223	0	Loss		0	0	0	0	0	0
Bcin15g00890	224	no	no	Cytochrome P450	0	0	100	100	0	65	0	0	0	0	180	179	0	0	Loss		0	0.0972964	0	0	0.0480606	0.0290714
Bcin15g00900	239	n.a.	no	Hypothetical	30	30	100	100	100	100	0	0	0	0	240	239	396	403	Loss		0.143245	0.305132	0	0	0	0.0896754
Bcin15g00910	76	n.a.	no	Hypothetical	100	80	100	100	80	100	0	0	0	0	0	0	0	0	Unique		1.75148	0.216284	1.5668	0.618917	0	0.830696
Bcin15g01000	438	n.a.	no	Hypothetical (PHA03247)	30	30	100	100	80	100	0	0	0	0	0	0	404	266	Loss		0.0246073	1.62589	0.0627044	0	0	0.34264
Bcin15g01710	708	no	yes	Glycosyl hydrolase family 71 (a-1,3-glucanases)	0	0	100	100	100	100	0	0	0	0	1133	1132	1148	1182	Loss		0.311177	0.256291	0.102096	0.277045	0.571923	0.303706
Bcin15g02220	264	n.a.	yes	Hypothetical	50	50	100	100	70	100	0	0	0	0	264	358	802	0	Loss		0	0.150656	0	0	0.0574425	0.0416197
Bcin15g03950	199	no	no	NAD(P)H steroid dehydrogenase-like protein	0	0	100	100	100	100	0	0	0	0	0	0	288	0	Loss		0	0	0	0	1.54736	0.309471
Bcin15g03960	342	yes	no	Tyrosinase	0	0	100	100	100	100	0	0	0	0	0	0	342	370	Loss		6.55146	0.151227	0	0.0749926	214.603	44.2761
Bcin15g03970	222	yes	no	Hypothetical (DUF3328)	0	0	100	100	100	100	0	0	0	0	0	0	222	0	Loss		5.37794	0.221874	0.118278	0	254.407	52.0249
Bcin15g03980	149	yes	no	Hypothetical (SnoaL_2)	0	0	100	100	100	100	0	0	149	149	0	149	149	150	Loss		169.263	16.2243	0	0.395961	66052.1	13247.6
Bcin15g04290	9	n.a.	no	Hypothetical	0	0	100	100	0	0	0	0	0	0	0	0	0	0	Unique		0.452669	0.293892	0	0	0	0.149312
Bcin15g05620	465	no	no	MFS transporter, multidrug resistance	0	0	100	100	100	100	0	0	0	0	503	502	396	572	Loss		0.28848	0.267621	0.0527287	0.271703	1.27532	0.43117
Bcin15g05640	148	no	no	Crotonase/Enoyl-CoA hydratase	0	0	90	85	0	85	0	0	0	0	282	293	0	294	Loss	End of chromosome	0.430163	0	0	0	0.0518483	0.0964022
Bcin15g05650	248	no	no	Aldehyde reductase	0	0	100	100	0	100	0	0	0	0	233	351	0	347	Loss	End of chromosome	0.128235	0.0668831	0	1.1262	0.122726	0.288809
Bcin15g05660	357	yes	no	Formaldehyde dehydrogenase (FDH)-like	0	0	100	100	80	100	0	0	0	0	358	357	357	358	Loss	End of chromosome	33.3225	0.706394	1.34797	10.3252	2.99372	9.73916
Bcin15g05670	1054	yes	no	Fungal-type Na(+)-ATPase	0	0	100	100	100	100	0	0	0	0	1058	1057	0	1055	Loss	End of chromosome	46.7359	5.00916	0.0285885	0.0733211	6.50563	11.6705
Bcin15g05680	579	yes	no	Carboxylesterase family	0	0	100	100	0	100	0	0	0	0	577	592	0	593	Loss	End of chromosome	0	0.229513	0.0520014	0	0.0262453	0.0615519
Bcin15g05690	282	yes	no	17beta hydroxysteroid dehydrogenase-like	0	0	100	100	0	100	0	0	0	0	283	282	0	283	Loss	End of chromosome	0.358946	0.423221	0.746028	0.883465	0.358554	0.554043
Bcin15g05700	606	yes	yes	Carboxylesterase family	0	0	100	100	0	100	0	0	0	0	607	606	0	613	Loss	End of chromosome	99.4398	40.8486	0.29813	0.960314	0.140332	28.3374
Bcin15g05710	449	n.a.	no	Hypothetical (DUF3533)	0	0	100	100	0	100	0	0	0	0	450	449	0	428	Loss	End of chromosome	14.5992	1.47224	0.536192	0.517262	0.743666	3.57371
Bcin15g05720	251	yes	no	Cys peptidase C12 containing ubiquitin C-terminal hydrolase	0	0	100	100	0	100	0	0	0	0	252	251	0	252	Loss	End of chromosome	7.18528	1.36022	0	0.117846	17.3834	5.20936
Bcin16g00003	223	n.a.	no	Hypothetical	100	100	100	100	0	100	0	0	0	223	0	0	0	518	Loss	End of chromosome	22.4937	0	0	0.292929	0	4.55733
Bcin16g00004	97	no	no	Medium chain dehydrogenase	0	0	100	100	0	100	0	0	0	0	273	272	0	335	Loss	End of chromosome	0	0	0	0	0	0
Bcin16g00005	830	yes	no	Glycosyltransferase (GT1_Gtf_like)	0	0	100	100	0	100	0	0	0	0	803	802	0	835	Loss	End of chromosome	4.36197	18.4009	0.413162	0.608979	0.0388153	4.76476
Bcin16g00006	611	yes	yes	FAD/FMN-containing dehydrogenase	0	0	100	100	0	100	0	0	0	0	612	611	0	0	Loss	End of chromosome	10.805	2.70315	0.0492824	0	0.0403167	2.71955
Bcin16g00010	362	yes	no	Substrate binding domain of ABC transporters	0	0	100	100	100	100	0	0	0	0	363	362	362	363	Loss		1.6662	0.284384	0.0830877	1.50686	0.0638463	0.720877
Bcin16g00250	344	yes	no	Aldo-keto_reductase	0	0	100	100	0	100	0	0	0	0	345	344	0	345	Loss		0	309.462	1.66103	0.104113	0.0441225	62.2543
Bcin16g00760	39	no	no	Aldehyde dehydrogenase family	0	0	100	100	100	100	0	0	0	0	0	0	0	375	Loss		0.031053	0.419573	0	0.129118	0.0997725	0.135903
Bcin16g00770	530	yes	no	Cytochrome P450	0	0	100	100	45	100	0	0	0	0	377	376	0	414	Loss		1.25005	1.43381	0.530378	0.545348	4.27806	1.60753
Bcin16g00780	309	n.a.	no	Hypothetical	0	0	100	100	100	0	0	0	0	0	310	309	310	0	Loss		7.25797	0.0537223	15.8588	10.6905	0.246258	6.82143
Bcin16g00790	129	no	yes	Glycosyl hydrolase family 71	0	0	100	100	100	0	0	0	0	0	852	548	0	0	Loss		0	0	0	0	0.0594261	0.0118852
Bcin16g00800	726	yes	no	Glycosyl hydrolase family 71	0	0	100	100	85	0	0	0	0	0	852	548	1267	0	Loss		0	0	0	0	0.0209385	0.0041877
Bcin16g01850	123	n.a.	no	Hypothetical	0	0	25	25	100	90	0	0	0	0	0	0	0	521	Loss		0.0954525	0.268611	0	0	0.0613801	0.0850888
Bcin16g01860	592	yes	no	Fungal specific transcription factor (GAL4-like Zn2Cys6 )	0	0	100	100	100	100	0	0	0	0	593	592	592	593	Loss		4.47664	1.72314	2.33963	10.4167	3.45962	4.48315
Bcin16g01870	254	yes	no	Short chain dehydrogenase subgroup 10	0	0	100	100	100	100	0	0	0	0	234	233	254	234	Loss		2.6794	1.47899	0.773355	3.49486	7.25218	3.13576
Bcin16g01880	306	no	no	O-methyltransferase	0	0	100	100	55	75	0	0	0	0	307	306	422	0	Loss		0	0.433608	0	0.0585002	0.567325	0.211887
Bcin16g02070	132	n.a.	no	Hypothetical	100	100	100	100	100	100	0	0	0	0	0	0	0	0	Loss		0.814093	2.85342	0.680319	0.493355	6.06787	2.18181
Bcin16g02140	439	n.a.	no	Hypothetical	100	100	100	100	100	0	0	0	0	0	312	321	416	0	Loss	AT-rich region	1.53535	7.69105	0.205642	0.541553	0.902987	2.17532
Bcin16g02600	87	n.a.	no	Hypothetical	0	0	100	100	0	0	0	0	0	0	0	0	0	0	Unique		0.0644085	0.340147	0	0.0892698	0.255597	0.149884
Bcin16g02940	237	n.a.	no	Hypothetical	0	0	100	0	100	0	0	0	0	0	0	0	0	0	Loss		1.61699	0	0	0	0	0.323397
Bcin16g03030	149	n.a.	no	Hypothetical	0	0	80	75	100	20	0	0	0	0	0	0	122	0	Loss		11.8894	0	0	0.754212	6.90613	3.90996
Bcin16g03760	414	n.a.	no	Hypothetical	100	100	100	100	90	100	0	491	414	414	415	414	563	154	Loss		0.474527	2.37454	0.145353	0.158111	0.93368	0.817242
Bcin16g05196	249	n.a.	no	Hypothetical	0	0	100	100	0	0	0	0	0	0	280	279	0	0	Loss	End of chromosome	0.652235	0	0.215434	0.937374	0.11538	0.384085
Bcin16g05198	431	yes	no	Aspartate aminotransferase family	0	0	100	100	0	0	0	0	0	0	432	406	0	0	Loss	End of chromosome	15.6727	0.0772803	2.79915	23.8084	2.66668	9.00484
Bcin16g05200	836	no	no	Sucrose-6-phosphate hydrolase SacC (Glyco_32)	0	0	100	100	0	100	0	0	0	0	971	1039	0	1263	Loss	End of chromosome	0.0251093	0.0386984	0	0.0348166	0.113222	0.0423692
Bcin17g00060	558	yes	no	Serine/Threonine protein kinases	0	0	100	100	0	0	0	0	0	0	559	558	0	0	Loss	B0510-specif chrom	3.05351	0.779908	1.0791	2.11286	6.78213	2.7615
Bcin17g00065	200	n.a.	no	Hypothetical	0	0	100	100	0	0	0	0	0	0	0	0	0	0	Loss	B0510-specif chrom	12.5029	6.43475	16.0139	15.3878	20.2352	14.1149
Bcin17g00070	1133	yes	no	Protease, Ulp1 family	0	0	100	100	0	0	0	0	0	0	1134	1133	0	0	Loss	B0510-specif chrom	14.4641	17.29	12.9899	15.9493	21.8793	16.5145
Bcin17g00090	531	n.a.	no	Hypothetical	0	0	100	100	0	0	0	0	0	0	219	218	0	0	Unique	B0510-specif chrom	0	0.251541	0	0.10293	0.388968	0.148688
Bcin17g00110	602	yes	no	Hypothetical (DnaJ domain)	0	0	100	100	0	0	0	0	0	0	505	516	0	0	Unique	B0510-specif chrom	0	1.14598	0	0.184358	3.31233	0.928533
Bcin17g00120	512	n.a.	no	Hypothetical	0	0	100	100	0	0	0	0	0	0	400	399	0	0	Loss	B0510-specif chrom	0	1.3979	0	0.0448989	0.980735	0.484708
Bcin17g00130	715	n.a.	no	Hypothetical	0	0	100	100	0	0	0	0	0	0	716	715	0	0	Unique	B0510-specif chrom	0.446038	0.89725	0.631861	0.567236	7.61588	2.03165
Bcin17g00140	310	n.a.	no	Hypothetical	0	0	100	100	0	0	0	0	0	0	404	403	0	0	Unique	B0510-specif chrom	6.81169	29.3061	12.9462	6.9139	32.9307	17.7817
Bcin17g00150	566	n.a.	no	Hypothetical	0	0	100	100	0	0	0	0	0	0	244	243	0	0	Unique	B0510-specif chrom	0	0	0	0	0	0
Bcin17g00160	77	n.a.	no	Hypothetical	0	0	100	100	0	0	0	0	0	0	78	77	0	0	Unique	B0510-specif chrom	0	0	0	0	0	0
Bcin17g00170	333	n.a.	no	Hypothetical	0	0	100	65	0	0	0	0	0	0	334	0	0	0	Unique	B0510-specif chrom	0.318098	1.70385	0.451509	1.06908	24.5904	5.62659
Bcin17g00180	275	n.a.	no	Hypothetical	0	0	100	100	0	0	0	0	0	0	232	231	0	0	Loss	B0510-specif chrom	0	0	0	0	0.0894365	0.0178873
Bcin17g00230	910	yes	no	Protease, Ulp1 family (peptidase C48)	0	0	100	100	0	0	0	0	0	0	869	878	0	0	Loss	B0510-specif chrom	5.51649	30.5123	14.9757	7.57057	7.46472	13.2079
Bcin18g00010	412	n.a.	no	Hypothetical	0	0	0	100	0	0	0	0	0	0	0	365	0	0	Loss	B0510-specif chrom	0.164949	0	0.0555789	0.318182	0.0567334	0.119089
Bcin18g00020	402	yes	no	Alkene reductase	0	0	0	100	0	0	0	0	0	0	0	402	0	0	Loss	B0510-specif chrom	6.71265	0	1.79502	24.9249	0	6.68652
Bcin18g00040	179	n.a.	no	Hypothetical	0	0	0	100	0	0	0	0	0	0	0	171	214	0	Loss	B0510-specif chrom	1.21894	0.0925217	1.17292	0.694502	1.8732	1.01042
Bcin18g00060	1217	yes	no	Protease, Ulp1 family	0	0	0	100	0	100	0	0	0	0	0	1217	0	1085	Loss	B0510-specif chrom	3.68056	6.17569	9.18692	5.45652	8.34812	6.56956
Bcin18g00090	146	n.a.	no	Hypothetical	0	0	0	100	0	0	0	0	0	0	0	146	0	0	Loss	B0510-specif chrom	0	0	0	0	0	0
Bcin18g00110	605	n.a.	no	Hypothetical (PHA03307)	0	0	0	100	0	0	0	606	0	0	0	605	0	0	Loss	B0510-specif chrom	4.16726	15.2044	20.804	5.64653	3.74669	9.91377
Bcin18g00120	194	n.a.	no	Hypothetical	0	0	0	100	0	0	0	120	0	0	0	194	0	0	Loss	B0510-specif chrom	0	0.658819	0	0.079001	2.02439	0.552441
Bcin18g00130	80	n.a.	no	Hypothetical	0	0	0	100	0	0	0	0	0	0	0	80	0	0	Loss	B0510-specif chrom	0	0.499049	0.37701	0	0.0951392	0.19424
Bcin18g00135	401	n.a.	no	Hypothetical	0	0	0	100	0	0	0	134	0	0	0	0	0	0	Loss	B0510-specif chrom	ND	ND	ND	ND	ND	5
Bcin18g00140	688	n.a.	no	Hypothetical (PTZ00395)	0	0	0	100	0	0	0	630	0	0	0	688	0	0	Loss	B0510-specif chrom	0.618615	0.086917	0.306424	1.03054	8.7499	2.15848
Bcin18g00145	90	n.a.	no	Hypothetical	0	0	0	100	0	90	0	0	0	0	0	0	0	0	Unique	B0510-specif chrom	ND	ND	ND	ND	ND	100
Bcin18g00150	644	n.a.	no	Hypothetical	0	0	0	80	0	85	0	0	0	0	0	391	0	387	Loss	B0510-specif chrom	2.79347	3.5347	4.02144	1.40165	5.86455	3.52316
Bcin18g00160	577	n.a.	no	Hypothetical	0	0	0	100	0	100	0	0	0	0	0	577	0	546	Loss	B0510-specif chrom	0.400239	0.391738	0	0.0310719	3.93879	0.952367
Bcin18g00170	668	n.a.	no	Hypothetical	0	0	0	100	0	0	0	0	0	0	0	668	0	0	Loss	B0510-specif chrom	0.198167	0	0.13525	0.551284	0.0344723	0.183835
Bcin18g00180	440	n.a.	no	Hypothetical (PLN02328)	0	0	0	80	0	0	0	0	0	0	0	356	0	0	Loss	B0510-specif chrom	2.22207	1.46475	1.41958	2.64037	2.46403	2.04216
Bcin18g00190	313	n.a.	no	Hypothetical	0	0	0	100	0	0	0	0	0	0	0	0	0	0	Loss	B0510-specif chrom	10.9089	3.99269	6.25979	9.74995	5.97386	7.37704
																Total number of stage-specifically expressed genes					48	23	4	17	67
aGenes encoding truncated proteins are shown in italics
bGenes with red or yellow background are in clusters
cUpregulation (>3-fold higher expression than average of all stages)
dBelow threshold expression (RPKM < 2,00)
