# Supplementary material for: Genome Comparisons between Botrytis fabae and the Closely Related Gray Mold Fungus Botrytis cinerea Reveal Possible Explanations for Their Contrasting Host Ranges
Source: J Fungi (Basel). 2024 Mar 14;10(3):216. doi: 10.3390/jof10030216 (PMC10971195; doi:10.3390/jof10030216)
Supplement: Supplementary file 1 [file jof-10-00216-s001.zip › Table S5.xlsx]

## Sheet: Table S5 Bfab-specific
Table S5: B. fabae G12-specific genes
					Presence of homologous DNA [%]				Size of protein [aa]								B. fabae G12 gene expression ( RPKM)
Name	Size [aa]	Intact?	SignalP	Predicted function	Bfab11002	BcB0510	BcT4	BcDW1	Bfab11002	Bf611	Bf612	BcinT4	BcinDW1	Bcalthae (MUCL2830)	Loss/Unique	Genomic location	Inf leaf	Conidia	Germl	Mycel	Sclerot	Mean
Bfab01g00315a	277	no	no	Ankyrin repeat protein	100	100	100	100	181	181	181	244	244	1453	Loss	AT-rich region	0.504532	0.532116	1.57074	3.88654	3.87919	2.07462
Bfab01g00415	230	n.a.	no	Hypothetical	100	0	0	0	408	371	371	0	0	311	Loss		137.945	226.949	440.47	414.622	352.011	314.4
Bfab01g01235	866	yes	no	Bacterial alpha-L-rhamnosidase	100	100	100	100	866	866	866	866	866	866	Loss		0.896437	1.59728	8.42592	0.974686	1.01427	2.58172
Bfab01g03365	470	n.a.	no	Hypothetical	100	15	100	100	470	470	470	470	470	472	Loss		0.502638	0.3462	0.107304	0.256526	8.19641	1.88182
Bfab01g03525	351	n.a.	no	Hypothetical	100	100	100	100	351	351	351	246	246	0	Loss		0.0996164	0.120072	0	0	0.117834	0.0675044
Bfab01g03775	443	no	no	Drug resistance MFS transporter	100	100	100	100	443	443	443	346	346	464	Loss		0.145498	0.306905	0.144951	0.194923	0.0860529	0.175666
Bfab01g03805	310	n.a.	no	Hypothetical	100	100	100	100	430	488	488	0	554	401	Loss		0	0.135901	0.0561628	0.704898	0.400105	0.259413
Bfab01g09055	198	n.a.	no	Hypothetical	100	100	100	77	178	178	178	0	0	0	Loss		0	0.0764751	0	0	0	0.015295
Bfab01g10775b	401	n.a.	no	Hypothetical	100	0	0	0	401	401	401	0	0	0	Unique		113.626	0.372928	0	9.53344	8.64623	26.4357
Bfab01g10785	551	yes	no	Drug resistance MFS transporter	100	0	0	0	531	471	471	0	0	0	Loss		61.1869	0.213153	0.78021	4.53518	9.02465	15.148
Bfab02g01155	209	n.a.	no	Hypothetical	100	0	0	0	188	188	209	0	0	0	Unique		2.17069	1.20758	0	0.372828	9.8756	2.72534
Bfab02g01425	459	n.a.	no	Hypothetical	100	0	0	0	459	459	459	0	0	479	Loss		0.0675192	0.122075	0.0336328	0.0904552	0	0.0627365
Bfab02g01785	318	no	no	NADPH oxidase (NOX)	100	100	100	100	483	318	534	0	0	618	Loss		0	0	0	0	0.0804868	0.0160974
Bfab02g01875	397	yes	no	HNH endonuclease domain	100	15	15	17	542	375	375	274	0	0	Loss		14.5563	13.9241	14.0801	20.5215	15.6166	15.7397
Bfab02g02735	468	yes	no	SET domain lysine methyl transferase	100	100	100	100	468	470	470	0	348	260	Loss		2.07245	0.0861383	0.427173	0.542526	48.691	10.3639
Bfab02g06135	162	n.a.	no	Hypothetical	100	100	100	100	133	138	138	0	0	0	Loss		0.729254	5.60362	44.8623	1.22122	1.1861	10.7205
Bfab02g08175	268	yes	no	RecQ mediated genome instability protein	100	100	100	100	268	0	0	274	274	0	Loss		10.9497	12.0982	17.4017	28.5817	7.01571	15.2094
Bfab03g01055	152	n.a.	no	Hypothetical	100	100	100	100	1141	152	1452	1140	1140	0	Loss		0.458366	2.34807	0.456644	3.07035	0.135547	1.2938
Bfab03g02685b	261	n.a.	no	Hypothetical (DUF3435)	100	0	0	0	261	312	312	0	0	0	Unique		7.70335	21.7668	7.73732	5.92139	3.65978	9.35774
Bfab03g02686	1269	yes	no	Fibronectin type 3 domain protein	100	0	0	0	1251	1269	1269	0	0	0	Unique		31.8622	17.3886	5.25374	4.64832	10.6796	13.9665
Bfab03g02985	238	n.a.	no	Hypothetical	100	100	100	100	238	238	238	0	0	0	Loss		0	0.707368	0.219246	0.065518	0.347092	0.267845
Bfab03g04095	177	n.a.	no	Hypothetical	100	100	100	100	177	177	177	179	158	215	Loss		0	1.0685	0	0.879708	0.11651	0.412944
Bfab03g04815	391	n.a.	no	Hypothetical	100	100	100	100	391	0	0	0	0	0	Loss		0.252266	0.304066	0.125659	1.42694	0.1492	0.451626
Bfab03g05255	277	no	no	Methyltransferase	100	100	100	100	277	277	277	0	0	0	Loss		0	0.184833	0	0.136957	0.181389	0.100636
Bfab03g05575	347	n.a.	no	Hypothetical	100	100	100	100	347	347	347	0	0	505	Loss		0	0	0.0501915	0	0	0.0100383
Bfab03g05795	167	n.a.	no	Hypothetical	100	100	100	100	167	167	167	0	0	0	Loss		0	0	0	0.186414	0.24689	0.0866608
Bfab03g06465	358	n.a.	no	Hypothetical (membrane protein)	100	0	0	0	358	358	358	0	0	0	Unique		0	0.0531861	0	0	127.199	25.4504
Bfab03g06466	560	yes	no	MFS drug resistance transporter	100	0	0	0	548	548	548	0	0	0	Unique		0	0.157863	0.0260956	0.0233946	108.383	21.718
Bfab03g06467	205	yes	no	Serine hydrolase (FSH1)	100	0	0	0	205	205	205	0	0	0	Unique		0.126588	0.228873	0.252226	0.847949	55.9273	11.4766
Bfab03g06475	472	n.a.	no	Hypothetical	100	100	100	100	252	318	318	255	138	507	Loss		0.214976	0.172746	0.249863	0.416003	0.25429	0.261576
Bfab03g06476	260	no	no	Terpene synthase family	100	100	100	100	186	186	186	108	108	0	Loss		0	0	0.227578	0.102012	0.0675529	0.0794286
Bfab03g06635	400	no	no	Phosphotransferase and choline kinase family	100	100	100	100	366	366	366	162	162	416	Loss		4.11705	4.25353	5.98497	20.4865	3.0313	7.57467
Bfab03g08475	108	n.a.	no	Hypothetical	100	100	100	100	108	108	108	87	87	913	Loss		0.321697	0.387754	0.320489	1.00561	0.570791	0.521268
Bfab04g00415	691	yes	no	HET protein	100	20	20	0	691	691	691	0	0	447	Loss		0.049341	0	0.147467	0.022034	0.379367	0.119642
Bfab04g00985	554	n.a.	no	Hypothetical	10	33	33	0	413	0	0	0	0	0	Loss		0	0.152307	0.0629428	0	0	0.04305
Bfab04g00995	158	no	no	NAD(P)(+)-binding protein	0	100	100	0	0	0	0	0	0	0	Loss		0.220534	0.132909	0	0	0.130432	0.0967753
Bfab04g01145	442	yes	no	MFS monocarboxylate transporter	100	100	100	100	442	442	442	0	0	314	Loss		0.146307	0.396787	0.510152	0.45735	0.173063	0.336732
Bfab04g01816	169	n.a.	no	Hypothetical	100	100	100	100	169	169	169	166	166	197	Loss		0	0	0	0	0	0
Bfab04g02335	474	n.a.	no	Hypothetical	100	0	100	100	474	444	444	327	325	0	Loss		2.40526	0.511617	2.04384	14.8164	36.4846	11.2523
Bfab04g02535	246	n.a.	no	Hypothetical	100	100	100	100	246	466	246	0	0	0	Loss		0	0.0855571	0	0	0	0.0171114
Bfab04g03045	214	n.a.	no	Hypothetical	100	100	100	100	214	214	214	0	0	245	Loss		0	0.0844179	0.20932	0.0625518	0	0.071258
Bfab04g03645	239	n.a.	no	Hypothetical	100	100	100	100	534	534	534	239	583	597	Loss		0.271471	0.409018	0.676127	0.666762	4.9773	1.40014
Bfab04g04035	128	n.a.	no	Hypothetical	100	100	100	100	128	128	128	0	0	0	Loss		2.17457	1.14673	0.812401	0.485544	1.60766	1.24538
Bfab04g04445	386	n.a.	no	Hypothetical	100	100	100	100	386	367	367	0	0	358	Loss		0.362429	0.546062	0.767268	1.37571	1.12536	0.835365
Bfab04g04675	239	no	no	Choline dehydrogenase	100	100	100	100	144	239	239	201	201	0	Loss		0	0.072043	0	0	0	0.0144086
Bfab04g05315	523	n.a.	no	Hypothetical	100	0	0	0	413	856	463	0	0	0	Loss		40.6861	36.1755	34.3999	54.0587	72.6648	47.597
Bfab04g06625	506	yes	no	Cytochrome P450	100	0	18	100	506	506	506	506	506	506	Loss		0.33459	0.241976	0.166666	0.209182	1.4248	0.475443
Bfab05g00795	169	n.a.	no	Hypothetical	100	100	100	100	169	169	169	169	169	185	Loss		0	0	0	0.0921106	0	0.0184221
Bfab05g03165	159	n.a.	no	Hypothetical	100	100	100	100	159	0	159	0	167	0	Loss		0	0.528315	0.327499	0.685072	0.518469	0.411871
Bfab05g04395	198	no	no	Ser/Thr protein phosphatase	100	65	65	65	198	190	190	0	0	248	Loss		0.704824	0.955746	2.1943	2.59668	1.25058	1.54043
Bfab05g04845	123	n.a.	no	Hypothetical	100	100	100	100	124	387	387	0	0	0	Loss		1.13113	3.06764	0.42258	2.39933	5.01744	2.40762
Bfab05g06225	304	yes	no	WD40 repeats protein	100	100	100	40	276	304	0	0	0	0	Loss		0	0	0	0	0	0
Bfab05g06645	362	yes	no	Tyrosinase	100	100	100	100	315	344	344	0	0	0	Loss		0.245974	0.247069	0.571784	84.4696	0.145478	17.136
Bfab05g07585	408	no	no	Choline dehydrogenase	100	100	100	100	338	427	427	432	432	457	Loss		0.493462	0.551127	0.788138	0.842083	10.1453	2.56402
Bfab05g08275	249	n.a.	no	Hypothetical	100	100	100	100	410	410	410	373	373	414	Loss		0.28052	1.69061	0.2096	0.187906	0	0.473727
Bfab06g00305	184	n.a.	no	Hypothetical	100	100	100	100	184	184	184	184	184	184	Loss		0	0.571152	0.0944142	0.507853	0	0.234684
Bfab06g00525	147	n.a.	yes	Hypothetical	100	100	100	100	155	0	0	0	0	0	Loss		0.710777	0.428364	14.5162	4.44371	2.38215	4.49624
Bfab06g00615	77	n.a.	yes	Hypothetical	100	100	100	100	1088	0	0	0	0	0	Loss		0.449551	13.2756	3.13504	2.40905	2.9247	4.43879
Bfab06g00985	157	n.a.	no	Hypothetical	100	100	100	100	157	157	157	0	157	182	Loss		0.443861	0.401252	0.66329	2.57676	1.18132	1.0533
Bfab06g01105	339	n.a.	no	Hypothetical	100	100	100	100	339	163	163	0	0	339	Loss		0.391059	0.17676	0.38959	2.96877	0.578218	0.900879
Bfab06g01425	148	n.a.	no	Hypothetical	100	100	100	100	148	148	148	150	150	148	Loss		5.17738	6.09867	158.958	7.98704	5.14989	36.6742
Bfab06g02735	222	no	no	L-aminoadipate-semialdehyde dehydrogenase	100	70	70	70	291	647	647	397	331	1070	Loss		2.04415	0.18953	0.626605	1.54481	1.48798	1.17862
Bfab06g03235	600	n.a.	no	Hypothetical	100	100	100	100	480	516	516	0	0	0	Loss		0.654636	2.00299	0.250837	4.22765	0.804136	1.58805
Bfab06g03265	168	n.a.	no	Hypothetical	100	100	100	100	0	168	168	0	0	0	Loss		0.41497	0.25009	0.103353	0.277967	0.490858	0.307448
Bfab06g03425	208	n.a.	no	Hypothetical	100	100	100	88	208	208	208	0	0	0	Loss		4.36215	3.43784	5.01434	8.54116	1.98457	4.66801
Bfab06g04105	128	n.a.	no	Hypothetical	100	100	100	100	128	128	128	0	0	0	Loss		1.08729	3.76783	1.0832	2.67049	2.08995	2.13975
Bfab06g04555	275	n.a.	yes	Hypothetical	100	100	100	100	275	275	275	0	0	279	Loss		21.6511	13.8	11.2931	8.35248	25.2754	16.0744
Bfab06g05365	229	n.a.	no	Hypothetical	100	100	100	100	378	386	386	0	112	278	Loss		0.457369	0.459405	0.303767	0.544654	5.95112	1.54326
Bfab06g05535	375	n.a.	no	Hypothetical	100	0	100	0	347	375	375	427	0	427	Loss		2.12846	2.12148	3.26225	4.3869	2.61454	2.90273
Bfab06g06485	266	n.a.	no	Hypothetical	100	100	100	100	266	266	266	266	0	264	Loss		61.4622	171.673	94.2674	53.0757	74.877	91.071
Bfab06g06875	91	n.a.	no	Hypothetical	100	100	100	100	97	91	97	690	91	250	Loss		0	1.14851	0.759419	1.36163	0.225421	0.698997
Bfab07g00185	184	n.a.	no	Hypothetical	100	100	100	100	151	151	151	0	0	0	Loss		0	0.913843	0.377657	15.6588	0.336304	3.45732
Bfab07g00375	171	n.a.	no	Hypothetical	100	100	100	100	171	171	171	558	558	355	Loss		0.611599	1.84296	1.2186	0.364158	1.44689	1.09684
Bfab07g00376	103	n.a.	no	Hypothetical	100	100	100	100	103	103	103	103	103	247	Loss		0	0	0	0.752827	0.398822	0.23033
Bfab07g02345	123	n.a.	no	Hypothetical	100	100	100	100	246	246	246	0	0	0	Loss		0.965091	1.01785	1.56238	2.26262	1.71237	1.50407
Bfab07g02405	126	n.a.	no	Hypothetical	100	100	100	100	126	556	126	126	126	126	Loss		1.38051	3.99356	5.36377	1.23298	11.7574	4.74564
Bfab07g02585	243	n.a.	no	Hypothetical	100	100	100	100	n.d.	n.d.	n.d.	246	246	262	Loss		3.45	1.74	2.79	6.92	2.46	3.6
Bfab07g05535	169	n.a.	no	Hypothetical	100	0	0	0	169	169	169	0	0	0	Unique	AT-rich region	14.026	12.9282	33.8031	4.60553	6.09963	14.2925
Bfab07g05795	424	n.a.	no	Hypothetical	100	100	100	100	347	347	347	0	0	471	Loss		0	0	0	0	0	0
Bfab07g06925	261	n.a.	no	Hypothetical	100	100	100	100	260	261	261	0	0	272	Loss		0	0	0.0572051	0	0	0.011441
Bfab07g07115	191	n.a.	no	Hypothetical	100	0	100	0	n.d.	n.d.	n.d.	0	0	0	Loss		0.18	2.68	1.27	0.49	0.65	1.23
Bfab07g07116	85	n.a.	no	Hypothetical	100	0	100	0	n.d.	n.d.	n.d.	0	0	0	Loss		1.01	0.29	0	0	0.8	0.31
Bfab08g00465	74	n.a.	no	Hypothetical	100	100	100	100	74	74	74	0	0	74	Loss		1.87013	1.97238	0.698665	3.34054	1.93562	1.96347
Bfab08g01955	166	n.a.	no	Hypothetical	100	100	100	100	166	166	166	0	0	0	Loss		17.8474	9.49069	11.9233	17.9092	7.32687	12.8995
Bfab08g02175	113	n.a.	no	Hypothetical	100	100	0	100	99	99	0	0	0	0	Loss	AT-rich region	0.922763	12.9762	2.75789	0.824147	0.181919	3.53258
Bfab08g02176	506	yes	no	Cytochrome P450	100	0	0	0	394	391	391	0	0	430	Loss	AT-rich region	7.59599	0.230817	0.381553	0.598607	1.77437	2.11627
Bfab08g02215	376	no	no	FAD/FMN-containing dehydrogenase	100	0	0	0	376	376	376	0	0	0	Unique	AT-rich region	2.19495	0.181516	0	0.576967	0.121483	0.614983
Bfab08g02335	236	n.a.	no	Hypothetical	100	60	60	100	493	257	257	0	257	0	Loss		1.08729	1.80201	4.33281	7.16177	4.50144	3.77706
Bfab08g03795	120	n.a.	no	Hypothetical	100	100	100	100	0	120	120	0	0	0	Loss		0.73052	0.528315	0.218333	1.37014	1.38258	0.845979
Bfab08g05275	168	no	no	Enoyl reductase like Zinc-binding oxidoreductase	100	100	100	100	244	239	225	0	0	0	Loss	AT-rich region	3.37619	0.321273	0.442567	0.39676	0	0.907358
Bfab08g05335	242	n.a.	no	Hypothetical	100	0	0	0	242	242	242	0	0	232	Loss		0	0.0869655	0	0.128879	0	0.0431689
Bfab08g06545	292	n.a.	no	Hypothetical	100	100	100	100	292	292	292	339	122	482	Loss		0	0.577	0.0596131	0.374101	5.59168	1.32048
Bfab09g00425	432	n.a.	no	Hypothetical	100	10	100	100	432	463	463	432	432	235	Loss		0	0	0	0	0	0
Bfab09g01215	280	n.a.	no	Hypothetical (DUF218)	100	100	0	100	0	0	0	0	0	0	Loss		0.374359	0.225615	0.621588	0.278626	0.147607	0.329559
Bfab09g03735	121	no	no	Ubiquitin-protein ligase (COG5078)	100	100	100	100	142	141	141	0	0	875	Loss		0.287418	0	0	0.385052	0	0.134494
Bfab09g03736	301	n.a.	no	Hypothetical	100	100	100	100	301	301	301	341	341	875	Loss	AT-rich region	0	0.139951	0	0.103701	0.0686714	0.0624646
Bfab09g04545	348	yes	no	Enoyl reductase like Zinc-binding oxidoreductase	100	100	100	0	348	348	348	348	0	0	Loss	AT-rich region?	0.47032	0.803102	0.117138	0	5.74875	1.42786
Bfab09g04546	2345	yes	no	Polyketide synthase	100	4	100	5	2305	2317	2317	2370	0	0	Loss	AT-rich region	0	0.00808027	0.0200356	0	0.0317187	0.0119669
Bfab09g04555	416	yes	no	Zn(II)2Cys6 transcription factor	100	100	100	100	296	301	301	0	0	0	Loss		0.807949	0.486926	0.442702	0.757684	2.96268	1.09159
Bfab09g05455	349	no	no	HET protein	100	100	100	100	349	349	349	0	0	0	Loss		0	4.34728	0.149714	0.223697	1.00731	1.1456
Bfab09g05695	378	n.a.	no	Hypothetical	100	0	0	0	378	378	378	0	0	249	Loss	Between two AT-rich regions	19.4175	0	0	0.273826	0.322364	4.00273
Bfab09g05716	519	yes	no	Cytochrome P450	100	0	0	0	494	544	479	0	0	494	Loss	Between two AT-rich regions	15.2577	0.100313	1.24367	4.36068	1.21414	4.4353
Bfab10g00005	237	n.a.	no	Hypothetical	0	0	0	0	0	0	0	0	0	0	Unique	Start of chromosome (AT-rich region)	0.294664	0	0.146778	0.39476	0.174275	0.202095
Bfab10g00535	202	n.a.	no	Hypothetical (PHA02596)	100	73	73	73	119	0	123	0	0	92	Loss		38.1742	214.97	42.2469	21.984	2.04323	63.8836
Bfab10g01995	203	n.a.	no	Hypothetical	100	100	100	100	135	0	0	0	0	0	Loss		1.89076	1.03591	0.599345	4.60553	1.72823	1.97195
Bfab10g02855	75	n.a.	no	Hypothetical	100	100	100	76	75	75	75	75	0	0	Loss		1.84553	9.176	5.05613	3.50263	2.72878	4.46181
Bfab10g02975	70	n.a.	no	Hypothetical	100	100	100	100	70	70	70	0	0	70	Loss		7.40809	6.25049	516.126	11.2479	20.1546	112.238
Bfab10g05065	481	no	no	Cytochrome P450	100	23	22	23	374	364	364	0	0	0	Loss		0	0	0.0275644	0.0741342	0.0327282	0.0268854
Bfab10g05066	546	yes	no	Choline dehydrogenase	100	0	0	0	543	543	543	0	0	0	Loss		0	0.0718389	0.17813	0.0798465	0.141	0.0941631
Bfab10g05325	182	n.a.	no	Hypothetical	100	100	100	100	81	81	81	81	81	0	Loss		3.28734	5.83927	4.91249	15.4528	2.66056	6.43049
Bfab10g06085	408	n.a.	no	Hypothetical	100	6	0	6	408	408	408	0	0	0	Loss		45.4125	61.7232	112.511	40.0629	34.935	58.929
Bfab11g02505	376	n.a.	no	Hypothetical	100	0	0	0	1513	1559	1559	0	0	0	Loss		0.465053	1.96191	1.01927	2.69979	2.03537	1.63628
Bfab11g03225	455	yes	no	LabA/DUF88 family protein	100	100	100	100	405	405	405	243	243	462	Loss		5.30589	2.64158	9.72922	7.27997	1.86467	5.36426
Bfab11g03705	241	n.a.	no	Hypothetical	100	100	100	100	241	241	241	241	241	241	Loss		4.78159	1.7465	3.46445	8.28234	0.171395	3.68925
Bfab11g04005	174	n.a.	no	Hypothetical	100	100	100	100	174	174	174	0	0	0	Loss		0.166448	0	0.165822	0	0	0.066454
Bfab11g05315	365	n.a.	no	Hypothetical	100	0	0	0	365	365	365	0	0	0	Unique		0.0760079	0	0	0	0.0449539	0.0241924
Bfab11g05316	637	yes	yes	Carboxylesterase	100	0	0	0	637	637	637	0	0	0	Unique		5.07285	0.0965449	0.159594	0.739222	0.726383	1.35892
Bfab11g05317	62	n.a.	yes	Hypothetical	100	0	0	0	607	0	0	0	0	0	Unique		4.04596	0	0	0	0.265881	0.862368
Bfab11g05318	203	n.a.	no	Hypothetical	100	0	0	0	449	449	449	0	0	0	Unique		0.997109	0	0	0.556592	0.147432	0.340227
Bfab12g00455	145	no	no	Alpha/beta hydrolase	100	100	100	100	170	170	170	204	0	389	Loss		0.205058	0.247165	0.102144	0.824147	2.18303	0.712308
Bfab12g01655	233	n.a.	no	Hypothetical	50	100	100	100	74	74	74	0	0	0	Loss		0	0.319545	0.105645	0.284131	0.125436	0.166952
Bfab12g01656	236	n.a.	no	Hypothetical	100	55	55	100	127	221	221	0	0	0	Loss		0.10509	0	0	0.187718	0.0621541	0.0709924
Bfab12g02615	79	n.a.	no	Hypothetical	100	100	100	100	104	104	104	0	131	131	Loss		0.333952	1.20758	1.16444	2.98263	0.790048	1.29573
Bfab12g02855	89	n.a.	no	Hypothetical	100	0	0	0	89	98	98	0	0	89	Loss		20.0827	0.144086	6.3118	2.24205	2.12101	6.18033
Bfab13g01685	450	n.a.	yes	Hypothetical	100	100	100	100	421	421	421	691	691	668	Loss		0.699745	1.35886	0.619659	0.347202	0.965663	0.798225
Bfab13g01795	257	n.a.	no	Hypothetical	100	100	0	100	257	257	257	180	180	0	Loss		0.543643	0.409547	0.406201	0.849702	2.49187	0.940192
Bfab13g02065	261	n.a.	no	Hypothetical	100	100	100	100	437	580	580	596	0	233	Loss		1.11121	4.46464	6.02722	9.70404	6.86424	5.63427
Bfab14g01045	447	n.a.	no	Hypothetical (DUF4045)	100	100	0	100	476	476	476	371	371	512	Loss		0	0.0450269	0.0372158	0	0	0.0164485
Bfab14g01065	135	n.a.	no	Hypothetical	100	100	100	100	393	392	392	0	0	0	Loss		0.13452	0.324286	5.76265	0.841009	2.30725	1.87394
Bfab14g01655	98	n.a.	no	Hypothetical	100	100	100	100	98	98	98	98	98	141	Loss		0.708383	1.0673	0.529292	0.474509	0.628447	0.681587
Bfab14g01975	226	n.a.	no	Hypothetical	100	100	100	100	226	226	226	226	226	226	Loss		17.7642	18.8052	43.8589	34.2148	50.3394	32.9965
Bfab14g03395	158	n.a.	no	Hypothetical	100	100	100	100	95	95	95	0	0	381	Loss		0.220534	7.31002	1.53794	2.06814	1.43476	2.51428
Bfab14g03605	113	n.a.	no	Hypothetical	100	100	100	75	148	148	148	97	0	0	Loss		0	0.153135	0.506279	0	4.80899	1.09368
Bfab14g03855	464	n.a.	no	Hypothetical	100	100	0	100	370	349	349	0	0	324	Loss		0.0638319	0.0384696	0.127184	0.456081	0.226516	0.182417
Bfab14g03856	129	n.a.	no	Hypothetical	100	100	0	100	81	110	110	0	0	0	Loss		0.201523	0.242904	0.70268	5.84955	0.953506	1.59003
Bfab14g03965	199	n.a.	no	Hypothetical	100	25	25	25	415	475	475	0	0	279	Loss		0.13733	0.0827648	0.684072	2.08511	0.487334	0.695323
Bfab14g03966	155	n.a.	no	Hypothetical	100	100	100	100	155	155	155	155	155	190	Loss		0.224776	0	0	0.803015	0	0.205558
Bfab14g05215	174	no	no	Ankyrin repeat protein	100	100	100	100	174	174	174	0	0	2155	Loss		0	0	0	0	0	0
Bfab15g00105	85	n.a.	no	Hypothetical	100	100	100	100	85	85	85	0	0	128	Loss		0	2.45728	1.0155	0.182079	0.241148	0.779202
Bfab15g00695	215	n.a.	no	Hypothetical	100	100	100	100	107	107	107	0	0	241	Loss		0	0	0	0.144989	0	0.0289978
Bfab15g01165	151	n.a.	no	Hypothetical	100	100	100	100	129	123	123	75	75	168	Loss		0	0.695152	0	1.23622	0	0.386274
Bfab15g01765	139	n.a.	no	Hypothetical	100	100	100	100	139	139	139	0	0	0	Loss		0.500928	0	0.249523	5.70428	0.444402	1.37983
Bfab15g03265	125	n.a.	no	Hypothetical	100	86	86	86	125	125	125	0	0	0	Loss		0.556587	8.55367	2.07936	0.124276	0.329187	2.32862
Bfab16g00035	321	n.a.	no	Hypothetical	100	100	100	100	321	321	321	83	83	321	Loss		2.15423	1.5751	4.00225	16.6694	13.795	7.63921
Bfab16g00045	171	n.a.	no	Hypothetical	100	100	100	100	132	132	132	132	132	132	Loss		0	0	0	0	0	0
Bfab16g00815	189	no	no	Short chain dehydrogenase	100	100	100	100	163	163	163	163	163	0	Loss		0.73821	2.33571	1.83859	2.39003	0.436605	1.54783
Bfab16g01585	218	n.a.	no	Hypothetical	100	100	100	100	0	218	218	0	0	0	Loss		0	0.0964959	0	0	0	0.0192992
Bfab16g02395	558	n.a.	no	Hypothetical (COG5592)	100	0	0	0	558	558	558	0	0	0	Loss	AT-rich region	19.5084	103.584	36.1519	69.4982	65.2955	58.8076
												Total number of stage-specifically expressed genes					10	6	6	6	14
aGenes encoding truncated proteins are shown in italics
bGenes with red or yellow background are in clusters
cUpregulation (>3-fold higher expression than average of all stages)
dBelow threshold expression (RPKM < 2,00)
