# Supplementary material for: Genome Comparisons between Botrytis fabae and the Closely Related Gray Mold Fungus Botrytis cinerea Reveal Possible Explanations for Their Contrasting Host Ranges
Source: J Fungi (Basel). 2024 Mar 14;10(3):216. doi: 10.3390/jof10030216 (PMC10971195; doi:10.3390/jof10030216)
Supplement: Supplementary file 1 [file jof-10-00216-s001.zip › Table S7.xlsx]

## Sheet: Table S7 Bfab-trunc
Table S7: B. cinerea B05.10 proteins, truncated in B. fabae G12
						Size of B. fabae proteins [aa]				Size ratio	Type of mutation leading to truncation					B. cinerea B05.10 gene expression (RPKM)c,e						B. fabae G12 gene expression ( RPKM)d,e
BcB0510 gene ID	Size [aa}	Intact?	SignalP	Predicted function	BfabG12 gene ID	BfG12	Bf11002	G611	G612	G12/B0510	Truncation type	Main mutation	Codon	Point mutation	No. of mutations leading to truncation	Inf. tissue	Asco	Germ	Mycel	Scler	Mean	Inf leaf	Conid	Germ	Mycel	Scler	Mean
Bcin01g00310a	298	no	no	Ankyrin repeats protein	Bfab01g00310	235	682	943	943	0.788591					>1	0.378227	0.142078	0	0.105684	2.30438	0.586074	0.14858	0.0895449	0.222033	0.265403	0.0878761	0.162688
Bcin01g01050	1076	n.a.	no	Hypothetical	Bfab01g01050	545	545	1012	1012	0.506506					>1	0.636019	6.6478	2.42623	0.927622	4.92681	3.1129	0.999477	10.353	1.27577	0.78108	6.42852	3.96756
Bcin01g01420	457	yes	no	Demethylmenaquinone methyltransferase	Bfab01g01420	139	139	164	164	0.304158					>1	2.20366	13.2185	6.86986	11.3733	2.65675	7.26442	0	0	0	0	0	0
Bcin01g01580	316	yes	no	Trypsin-like peptidase	Bfab01g01580	187	144	268	268	0.591772	Premature stop	Point mut.	188	TTA to TAA	1	4.93557	10.2216	1.74502	3.71637	2.86309	4.69634	6.29808	9.84821	11.8705	7.14528	8.65793	8.764
Bcin01g01640	577	yes	no	MFS_multidrug_transporter	Bfab01g01640	510	577	608	608	0.883882	Internal	Deletion	143		1	0.0625039	0.160735	0.0485161	0.0288894	1.20439	0.301006	0.17662	1.87341	0.12317	0.14197	0.605867	0.584207
Bcin01g02460	339	yes	yes	Expansin, peptidoglycan binding	Bfab01g02460	277	277	277	277	0.817109					>1	66.5204	1.323	1.2753	26.3216	6.86822	20.4617	77.2302	29.6908	42.1452	4.03869	37.4424	38.1095
Bcin01g02520	905	yes	no	Chitin synthase BcCHSIIIb	Bfab01g02520	505	485	911	911	0.558011					>1	0.102085	6.49775	0	0.0190991	0.0331578	1.33042	0	0	0	0	0.0395024	0.00790048
Bcin01g02540.3	383	n.a.	yes	Hypothetical	Bfab01g02540	247	247	247	247	0.644909	Premature stop	Point mut.	119	TCA to TGA	1	16.9558	69.7245	7.21094	11.6866	10.8965	23.2149	6.92816	11.5036	41.5537	12.3755	10.453	16.5628
Bcin01g02710	135	n.a.	no	Hypothetical	Bfab01g02710	72	2129	96	96	0.533333	Premature stop	Point mut.	73	TGG to TAG	1	2.52845	2.28299	2.42364	3.96667	3.96128	3.0326	0	0.289488	0.957075	2.35954	2.27274	1.17577
Bcin01g04150	402	n.a.	no	Hypothetical	Bfab01g04150	191	382	382	382	0.475124					>1	4.96774	0.404196	0.031582	0.2119	107.167	22.5564	6.25071	0.275643	0.379709	10.5527	139.671	31.4259
Bcin01g04430	557	yes	no	MFS_multidrug_transporter	Bfab01g04430	457	414	443	443	0.820467					>1	1.67826	0.0339874	0	0.784438	0.0131533	0.501968	0	0	0.0319511	0	0.189684	0.044327
Bcin01g05690	546	yes	no	Fungal Zn(2)-Cys(6) binuclear cluster domain	Bfab01g05690	415	398	551	551	0.760073					>1	0.0308518	0.344915	0	0.0387895	0.14221	0.111353	0.0812944	0.93088	0.080989	0.689761	0.144242	0.385433
Bcin01g05700	307	yes	no	RTA1-like membrane protein	Bfab01g05700	168	131	287	287	0.547231					>1	0.246863	0.151819	0.0809325	0.048192	0.815215	0.268604	0.134006	0.565331	0.133503	0.0598425	0.634051	0.305347
Bcin01g05770	321	yes	no	Alpha/beta hydrolase	Bfab01g05770	230	230	230	230	0.716511	Premature stop	Point mut.	91	CAA to TAA	1	5.12712	1.93177	0.908127	1.90755	6.73899	3.32271	1.97335	2.83598	3.85627	2.23697	14.0054	4.98159
Bcin01g05860	318	yes	no	NmrA-like family	Bfab01g05860	109	318	318	318	0.342767					>1	0.222845	0.0998614	0.0822568	0.259945	0.0672922	0.14644	0	0	0	0	0	0
Bcin01g05910	574	n.a.	no	Hypothetical	Bfab01g05910	136	136	395	395	0.236934					>1	0.411732	2.11933	0.280421	0.627161	2.21732	1.13119	0.511898	2.15954	0.509974	0.914382	0.756889	0.970536
Bcin01g06770	914	yes	no	Zinc finger C-x8-C-x5-C-x3-H type (and similar)	Bfab01g06770	650	526	1262	1262	0.71116					>1	0.350923	0.308146	0.0569968	0.0280602	3.20682	0.79019	0.105195	0.950967	0.1572	0.211394	0.279973	0.340946
Bcin01g06970	525	yes	yes	Carboxylesterase family	Bfab01g06970	305	502	502	502	0.580952	Premature stop	Frameshift	289		1	0.39945	0.157254	0	0.14633	1.12736	0.366079	0.212945	0.705846	0.689472	0.998486	5.66747	1.65484
Bcin01g07640	367	n.a.	no	Hypothetical	Bfab01g07640	229	229	264	264	0.623978	Premature stop	Point mut.	114	GAA to TAG	1	3.7678	0	0.0678788	0.30776	0.310987	0.890885	0.609826	0.275643	0.455651	8.51021	0.180337	2.00633
Bcin01g07750	674	n.a.	no	Hypothetical	Bfab01g07750	324	657	657	657	0.480712					>1	2.22916	0.054516	0.0823691	3.48682	10.2455	3.21967	0.863138	0.19507	0.16123	0.867256	9.69936	2.35721
Bcin01g07840	531	yes	no	Fungal Zn(2)-Cys(6) binuclear cluster domain	Bfab01g07840	427	427	427	427	0.804143	Premature stop	Point mut.	428	CAA to TAA	1	2.89305	2.59028	1.28672	3.70814	1.58607	2.41285	1.72225	5.06518	4.22082	4.3377	2.64837	3.59886
Bcin01g09220	124	n.a.	no	Hypothetical	Bfab01g09220	53	459	647	647	0.427419					>1	0.174554	16.7805	0.737128	1.74277	3.46564	4.58013	0	1.56538	1.29382	0.289978	0.768102	0.783456
Bcin01g09390	467	yes	no	Glycosyl hydrolase 1 SF	Bfab01g09390	389	389	389	199	0.832976					>1	1.33713	2.69754	0.216336	0.416129	6.73754	2.28094	4.80808	0.790278	0.326592	0.61811	427.758	86.8603
Bcin01g09700	1621	n.a.	no	Hypothetical	Bfab01g09700	1012	1621	1621	1621	0.624306	Premature stop	Point mut.	1013	TGG to TGA	1	0.151527	1.30665	0.140938	0.167021	1.06216	0.56566	0.160554	0.387044	0.111966	0.229433	1.06353	0.390504
Bcin01g10580a	309	n.a.	no	Hypothetical	Bfab01g10580	231	309	309	309	0.747573	Premature stop	Point mut.	232	TGG to TAG	1	7.87056	0.476031	0	0.242929	22.2109	6.16009	9.1816	0.790497	0.914711	2.51868	12.8001	5.24112
Bcin01g10590	372	n.a.	no	Hypothetical	Bfab01g10590	82	295	415	415	0.22043					>1	0.253185	0.197584	0.0319726	0.0505194	2.28498	0.563648	1.04153	0	0.345874	0.930225	1.02667	0.668861
Bcin01g10820	929	yes	no	Ankyrin repeats protein	Bfab01g10820	592	592	592	592	0.637244					>1	8.64035	1.89388	3.08161	3.94947	3.62826	4.23871	6.91839	2.70839	4.38875	10.0079	11.3661	7.0779
Bcin01g10940	575	yes	no	Cytochrome P450	Bfab01g10940	488	564	398	513	0.848696	Premature stop	Frameshift	11		1	2.93133	0.548306	1.68688	9.74306	3.25595	3.6331	0.558557	0.411431	0.587373	0.970014	0.880938	0.681663
Bcin02g00070.2	410	yes	yes	Alginate lyase	Bfab02g00070	110	110	504	504	0.268293	N-Terminus	Deletion			1	17.1041	1.58724	0.293536	0.362997	18.2854	7.52665	0	0.380768	0.157357	0.28214	0	0.164053
Bcin02g00090	693	n.a.	no	Hypothetical	Bfab02g00090	478	553	553	553	0.689755					>1	1.43112	2.33562	1.12065	2.13016	8.58885	3.12128	8.58219	3.19461	2.23179	2.50804	7.98697	4.90072
Bcin02g00180	520	n.a.	yes	Hypothetical	Bfab02g00180	289	498	498	498	0.555769					>1	0.815984	0.862407	0	0.766243	2.7408	1.03709	0.446214	0.13446	1.00021	1.04613	6.92758	1.91092
Bcin02g00290	124	n.a.	no	Hypothetical	Bfab02g00290	52	n.d.	250	275	0.419355	Premature stop	Point mut.	53	CAA to TAA	1	2.39236	0	0	0.594933	0.426944	0.682848	0	0	0	1.49131	0	0.298263
Bcin02g00390	691	yes	no	Fungal Zn(2)-Cys(6) binuclear cluster domain	Bfab02g00390	489	489	594	594	0.70767					>1	1.92288	0.56795	0.0903019	0.276055	1.56919	0.885275	0.490419	2.32754	0.580185	0.629637	1.01518	1.00859
Bcin02g00500	1166	yes	no	Ankyrin repeats protein	Bfab02g00500	513	513	758	758	0.439966					>1	14.8512	0.293723	0.0516895	1.70025	3.14889	4.00915	0.0682198	0.863394	0.135927	0.152323	0.121043	0.268182
Bcin02g00530	179	no	no	Cytochrome P450	Bfab02g00530	116	501	462	462	0.648045					>1	1.12112	13.9851	0.159076	1.23931	3.09742	3.92041	0.683084	0.686124	0.340259	3.05041	1.48134	1.24824
Bcin02g00600	700	yes	no	Ankyrin repeats protein	Bfab02g00600	431	431	701	701	0.615714					>1	0.042896	0	0	0.0445902	0.11666	0.0408292	0.0778069	0	0.0387573	0	0.0920359	0.04172
Bcin02g01220	214	no	no	ATPase family (AAA)	Bfab02g01220	148	278	478	478	0.691589	Loss of start codon	Point mut.	1	ATG to AGG	1	3.84774	2.8882	0.974427	2.04354	3.94447	2.73967	0	0.14183	0	0.105093	1.80942	0.411269
Bcin02g01470	1288	yes	no	Ankyrin repeats protein	Bfab02g01470	778	418	715	715	0.604037					>1	14.8978	0.203052	0.0242061	1.61185	2.27645	3.80267	0	0.037129	0	0.0137559	0.0182185	0.0138207
Bcin02g01480	987	yes	no	HET protein	Bfab02g01480	841	552	565	565	0.852077					>1	2.47065	0.0943255	0.0305272	0.535457	4.18923	1.46404	3.17662	0.809961	1.27805	3.23724	10.8632	3.873
Bcin02g01680	3183	yes	no	Polyketide synthase	Bfab02g01680	1758	3187	3187	3187	0.552309	Premature stop	Frameshift	1750		1	0.15272	0.383654	0.0473631	0.0767918	15.5324	3.23859	0.449468	0.223771	0.146015	0.549789	37.4823	7.77027
Bcin02g02380	2619	yes	no	Nonribosomal peptide synthase	Bfab02g02380	1316	2608	2642	2642	0.502482	N-Terminus	Point mut.	2604	TAC to TAA	1	1.21473	0.429323	0.0690706	0.329517	4.73404	1.35534	0.39623	0.587239	0.521676	18.3778	10.6482	6.10623
Bcin02g02900.2	563	yes	no	bZIP transcription_factor	Bfab02g02900	447	563	595	595	0.793961	N-Terminus	Frameshift	64		1	13.5991	66.907	23.3693	28.8202	24.4349	31.4261	14.6455	38.7108	25.3667	31.3065	17.9394	25.5938
Bcin02g03850	738	yes	no	HET protein	Bfab02g03850	614	653	634	634	0.831978	Premature stop	Frameshift	579		1	0.920097	0.644122	1.42846	1.55249	3.89795	1.68862	5.46827	4.34388	2.98387	3.07988	6.85547	4.54628
Bcin02g04330	850	n.a.	no	Hypothetical	Bfab02g04330	661	791	1237	1237	0.777647	Premature stop	Frameshift	631		1	1.4946	0.172107	0.141767	2.61808	2.94695	1.4747	0.207281	0.574492	0.294143	0.224414	6.17099	1.49426
Bcin02g05570	736	yes	no	HET protein	Bfab02g05570	343	343	294	343	0.466033					>1	0.285304	0.523754	0.0818476	0.347684	9.91441	2.2306	0	0.368592	0.0507751	0.0455198	0	0.0929774
Bcin02g05640	518	n.a.	no	Hypothetical	Bfab02g05640	301	492	492	492	0.581081	N-Terminus	Point mut.	185	TGG to TGA	1	1.34648	2.27653	0.290567	0.585548	7.60736	2.4213	0.232218	0.279902	0.17351	0.725904	1.03007	0.488321
Bcin02g05900	279	yes	no	DASH complex subunit Dam1	Bfab02g05900	221	221	221	221	0.792115					>1	61.5907	97.5872	59.3706	39.4654	53.2571	62.2542	46.1426	39.8259	48.1977	31.3366	24.8714	38.0748
Bcin02g06090	263	n.a.	no	Hypothetical	Bfab02g06090	181	472	534	534	0.688213	N-Terminus	Deletion	1	ATG to ACG	>1	0.471829	0.529725	0.228491	0.541553	0.499206	0.454161	0.770659	0.34834	1.15165	1.20452	0.569746	0.808983
Bcin02g06310	438	no	no	Fatty acid desaturase	Bfab02g06310	377	434	457	457	0.860731	N-Terminus	Point mut.	36	TAC to TAG	1	11.6086	0.88734	0.137407	7.44118	6.55605	5.32612	1.67536	1.16911	0.0878456	0.82691	0.625813	0.877008
Bcin02g07060	792	yes	no	HET protein	Bfab02g07060	382	703	493	493	0.482323					>1	2.00888	9.70082	4.03159	2.24711	6.13449	4.82458	2.10573	1.98635	2.23463	2.6575	1.89519	2.17588
Bcin02g07200	490	no	no	Oxidoreductase	Bfab02g07200	258	572	477	477	0.526531					>1	1.08577	0.11523	0	0.194121	18.9474	4.06849	0.179361	0	0.0446717	0.0800961	4.93275	1.04738
Bcin02g08840	355	n.a.	no	Hypothetical	Bfab02g08840	205	356	338	338	0.577465					>1	0.120374	0.710682	0.0847214	0.333675	0.356433	0.321177	0	1.51708	0.0659948	0.0591642	0	0.328447
Bcin02g08950	532	yes	no	Sugar (and other) transporter	Bfab02g08950	281	281	281	281	0.528195	Premature stop	Point mut.	282	TGG to TGA	1	14.5068	4.43367	2.54641	3.20344	19.1213	8.76233	15.9474	7.75827	5.98172	8.06535	13.9205	10.3346
Bcin02g09070	436	yes	no	Carboxylesterase family	Bfab02g09070	349	422	422	422	0.800459	Internal	Deletion	71		1	3.18778	0.517874	0.966251	1.65328	12.4577	3.75658	3.5737	0.71792	2.73867	6.17895	9.3758	4.51701
Bcin02g09090	630	n.a.	no	Hypothetical	Bfab02g09090	422	434	439	652	0.669841	Premature stop	Point mut.	423	TAC to TAA	1	4.45153	0.0316354	0	0.141191	245.027	49.9303	0.159386	0.0507995	0.121381	0.661119	36.6001	7.51856
Bcin02g09340	1029	yes	no	Fungal Zn(2)-Cys(6) binuclear cluster domain	Bfab02g09340	653	464	368	368	0.634597					>1	6.33975	0.517464	0.0586216	1.63362	10.0296	3.71581	0.945908	2.55031	3.34784	59.871	3.12112	13.9672
Bcin03g00130	369	yes	no	2OG-Fe(II) oxygenase superfamily	Bfab03g00130	299	383	383	383	0.810298					>1	0.111597	0.294676	0	0.0467697	0.510944	0.192797	0	0.331348	0.228222	0.163681	5.8531	1.31527
Bcin03g00330	550	no	no	HET protein	Bfab03g00330	375	375	269	283	0.681818					>1	0.176579	0.102245	0.0578903	0	0.0609954	0.0795419	0	0.168611	0.0464538	0.0832915	2.86813	0.633296
Bcin03g00740	482	n.a.	no	Hypothetical	Bfab03g00740	117	117	558	558	0.242739					>1	6.24805	11.9714	1.26993	4.29839	21.749	9.10734	3.41884	2.69441	2.35799	5.40228	12.9099	5.35668
Bcin03g00850	924	n.a.	no	Hypothetical	Bfab03g00850.2	519	928	928	928	0.561688					>1	0.17667	6.90648	0.945583	0.562293	1.92903	2.10401	2.63427	21.8379	1.75298	5.12164	8.0751	7.88439
Bcin03g00950	1150	yes	no	Phosphoribosyl transferase	Bfab03g00950	395	595	529	529	0.343478					>1	1.04794	0.0173431	0	0.0516022	15.8551	3.3944	0.0885479	0.693747	0.176431	0.15817	0.261853	0.27575
Bcin03g01080	584	yes	yes	Arylsulfotransferase (ASST)	Bfab03g01080	299	563	536	536	0.511986	Premature stop	Point mut.	300	TGG to TGA	1	0.328185	0.99561	0.309342	0.376622	3.79134	1.16022	0.391059	3.62016	0.912911	19.4584	4.33573	5.74365
Bcin03g01200	633	yes	no	ATPase family (AAA)	Bfab03g01200	520	624	624	624	0.821485					>1	4.68741	7.21975	2.18833	1.19733	6.15932	4.29043	1.86737	0.75027	1.60667	0.707552	2.2758	1.44153
Bcin03g01510	203	n.a.	no	Hypothetical	Bfab03g01510	110	110	286	286	0.541872					>1	0	0.326547	0	0	0.0402992	0.0733693	0.631801	0.190384	0	0	0	0.164437
Bcin03g01690	1482	yes	no	ABC transporter	Bfab03g01690	1232	1232	1280	1280	0.831309	Premature stop	Frameshift	1221		1	0.571787	5.69672	0	0.0484412	2.01515	1.66642	1.34335	1.47887	0.31674	2.23359	0.299281	1.13437
Bcin03g01870	472	n.a.	no	Hypothetical	Bfab03g01870	209	209	209	209	0.442797	Premature stop	Frameshift	196		1	1.14039	1.66086	0	0.239477	0.910949	0.790334	0.166976	0.201263	0.582221	1.26762	0.888804	0.621376
Bcin03g01930	802	n.a.	no	Hypothetical	Bfab03g01930	420	498	n.d.	n.d.	0.523691					>1	0.0177888	0.0497184	0	0.281244	0.147342	0.0992187	0.639699	0.514036	0.849728	1.46008	0.294266	0.751561
Bcin03g02260	416	yes	no	O-methyltransferase	Bfab03g02260	343	303	303	303	0.824519					>1	3.02279	2.79398	0.650953	1.37141	2.92064	2.15196	1.35626	8.98499	2.68705	4.42203	2.14367	3.9188
Bcin03g03220	477	yes	no	Glycosyl hydrolase 18 (chitinase)	Bfab03g03220	319	496	1097	1039	0.668763					>1	0.381062	0.748421	0.0579644	0.285366	4.34329	1.16322	0.751392	3.73594	0.0935712	0.209716	3.99962	1.75805
Bcin03g03280	421	yes	no	FMN-dependent dehydrogenase	Bfab03g03280	337	409	337	337	0.800475					>1	19.9776	7.31117	1.28648	3.12284	25.438	11.4272	1.34006	1.44217	1.38271	2.26547	1.9248	1.67104
Bcin03g03300	441	yes	yes	Eukaryotic aspartyl protease (Bcap7)	Bfab03g03300	366	441	441	441	0.829932	Premature stop	Frameshift	363		1	4.27514	1.20494	1.02356	0.781299	4.19822	2.29663	1.72194	1.65099	1.01369	2.06221	2.36089	1.76194
Bcin03g03400	808	n.a.	no	Hypothetical	Bfab03g03400	465	n.d.	465	465	0.575495	N-Terminus	Deletion			1	0.626498	0.473192	0.22369	0.500282	21.3528	4.6353	0.135999	0.286868	0.779054	0.698421	0.321739	0.444416
Bcin03g03680	794	no	no	HET protein	Bfab03g03680	346	630	494	494	0.435768					>1	0.0705778	0.0835811	0.189426	0.0310856	0.61848	0.19863	0	0.0425203	0.59745	0.0630133	0.250367	0.19067
Bcin03g03750	598	yes	no	Hyaluronan synthase	Bfab03g03750	524	524	469	469	0.876254					>1	0	0	0	0	0.491404	0.0982807	0	0.0402526	0	0	0.118507	0.031752
Bcin03g03800	292	yes	no	Phosphoribosyl transferase	Bfab03g03800	165	165	278	278	0.565068	N-Terminus	Deletion			1	9.07018	6.41896	7.3086	12.4164	4.5371	7.95026	3.90299	0.448041	3.98091	1.90893	1.31907	2.31199
Bcin03g03990	540	yes	yes	Tannase and feruloyl esterase	Bfab03g03990	237	237	237	237	0.438889					>1	0	0.0984653	0	0	0.0444804	0.0285891	0	0	0.0670933	0	0	0.0134187
Bcin03g04210	468	yes	no	Monocarboxylate MFS transporter	Bfab03g04210	419	459	445	445	0.895299	Internal	Deletion	393		1	2.62184	3.14356	0.51447	3.73467	2.17021	2.43695	5.3761	1.40239	4.35666	6.27068	3.51183	4.18353
Bcin03g04360	3941	yes	no	Polyketide synthase Bcpks3	Bfab03g04360	666	2437	3424	3424	0.168993					>1	1.39906	0.672892	0.512627	1.44245	12.6447	3.33434	0.14985	0.270931	0.248812	1.76217	0	0.486353
Bcin03g04870	368	n.a.	no	Hypothetical	Bfab03g04870	251	251	251	251	0.682065					>1	2.33671	0.27976	0	0.69251	3.06273	1.27434	0.325681	0	0.108152	0.387834	2.24723	0.61378
Bcin03g05030	234	n.a.	no	Hypothetical	Bfab03g05030	148	1103	383	383	0.632479					>1	1.31126	0.327039	0	0.171659	23.0381	4.9696	0.142734	0.0860215	0.355494	0.9561	5.74044	1.45616
Bcin03g05270	500	yes	no	Cytochrome P450	Bfab03g05270	362	362	362	362	0.724					>1	1.08581	0.0730855	0	0.0592756	0.208003	0.285235	0	0.116433	0	0.172549	0.114263	0.080649
Bcin03g05400	143	n.a.	no	Hypothetical	Bfab03g05400	89	89	89	89	0.622378	Loss of start codon	Point mut.	1	ATG to ATA	1	0.297591	0.369929	0	0	3.0371	0.740923	0	0	0.194074	0.347973	2.07388	0.523184
Bcin03g05450	464	no	no	FAD/FMN-containing dehydrogenase	Bfab03g05450	126	188	188	188	0.271552					>1	2.11978	2.97043	0.129724	5.45462	3.87765	2.91044	0	0	0	0	0	0
Bcin03g05830	239	yes	no	GDSL-like lipase/acylhydrolase	Bfab03g05830	113	210	157	157	0.472803	N-Terminus	Deletion			1	0.161902	0	0	0.224494	3.01141	0.679561	0	0	0.153216	0	0.181919	0.067027
Bcin03g06640	133	n.a.	no	Hypothetical	Bfab03g06640	60	60	n.d.	n.d.	0.451128	Premature stop	Point mut.	61	TGG to TGA	1	3.53955	4.31504	0.553748	2.65269	3.06678	2.82556	1.72451	3.46436	3.14972	12.5784	0.679959	4.31938
Bcin03g06800	195	n.a.	no	Hypothetical	Bfab03g06800	75	119	133	133	0.384615					>1	2.07814	0.520635	0.336992	1.43152	0.57588	0.988634	1.84553	0.278061	0	0.61811	1.09151	0.766642
Bcin03g07590	291	yes	no	Alpha/beta hydrolase	Bfab03g07590	100	655	172	172	0.343643	Premature stop	Frameshift	67		1	4.33748	5.42313	5.18227	7.23934	4.97547	5.43154	1.73589	2.92927	3.11286	5.42632	0.821337	2.80514
Bcin03g07760	430	no	no	MFS drug resistance transporter	Bfab03g07760	187	100	569	162	0.434884					>1	0.156439	0.0463154	0	0.0416695	0.429593	0.134803	0	0	0	0	0.0299982	0.00599964
Bcin03g08700	223	n.a.	no	Hypothetical	Bfab03g08700	170	170	116	170	0.762332					>1	0	0.233473	0.176379	0	2.30743	0.543457	0.205058	0.247165	0.612864	1.00729	1.45535	0.705546
Bcin03g08970	506	yes	no	FAD/FMN-containing dehydrogenase	Bfab03g08970	188	222	574	574	0.371542	N-Terminus	Deletion			1	0.0281743	0.0787453	0	0	8.97101	1.81559	0	0	0.0761626	0	0	0.0152325
Bcin03g09220	253	n.a.	no	Hypothetical	Bfab03g09220	199	199	199	199	0.786561	N-Terminus	Frameshift	3		1	0	0	0.301608	0.179596	0.235004	0.143242	0.175325	0.105663	0.349333	0.078294	0.82955	0.307633
Bcin03g09250	860	yes	no	ABC1 family protein kinase	Bfab03g09250	565	860	860	860	0.656977	N-Terminus	Frameshift	151		1	41.3259	24.569	37.7623	34.6926	36.7258	35.0151	22.0219	12.263	31.0292	42.8889	22.9337	26.2273
Bcin03g09316	182	n.a.	yes	Hypothetical	Bfab03g09316	114	162	393	162	0.626374					>1	49.8375	0	0.329627	83.7583	0.972008	26.9795	1.92537	0.105487	0.610315	1.95409	0.414085	1.00187
Bcin04g00660	1561	yes	no	HET protein	Bfab04g00660	889	273	805	757	0.569507	N-Terminus	Deletion			1	23.0444	0.502366	7.48235	44.0067	0.584187	15.124	6.03768	11.7092	3.93288	6.70597	21.5857	9.9943
Bcin04g00830	1508	yes	no	WD domain, G-beta repeat	Bfab04g00830	1204	905	878	905	0.798408	Internal	Deletion	1035		1	41.4014	0.0264572	0.459708	13.343	21.7323	15.3926	0.0823766	0.0661945	0.0410336	0.0122622	0.503447	0.141063
Bcin04g00900	1846	yes	no	Ankyrin repeats protein	Bfab04g00900	1135	1078	1100	1166	0.614843					>1	12.1918	1.18486	0.335002	8.63005	16.1822	7.70479	11.2088	2.75794	3.93865	6.71276	11.8197	7.28758
Bcin04g00950	1222	yes	no	Ankyrin repeats protein	Bfab04g00950	931	1021	1021	953	0.761866	Premature stop	Point mut.	932	TGG to TAG	1	28.6592	0.498057	1.0851	6.85172	18.8291	11.1847	27.5097	15.9107	15.2135	38.8525	34.8805	26.4734
Bcin04g00980	998	yes	no	WD domain, G-beta repeat	Bfab04g00980	156	234	1591	938	0.156313					>1	9.64523	1.64488	1.32223	4.22199	1.05413	3.57769	2.68013	0.942218	0.44501	0.7979	2.90607	1.55426
Bcin04g01000	393	yes	no	Aminotransferase class I and II	Bfab04g01000	241	241	241	241	0.613232					>1	1.91054	0.913633	1.43966	1.62542	3.15703	1.80926	1.15946	0.571724	1.0501	0.235353	1.3715	0.877628
Bcin04g01020	1087	no	no	WD domain protein	Bfab04g01020	636	392	392	392	0.585097					>1	14.8469	8.00586	2.90289	4.13329	13.779	8.73359	0.42015	1.45597	0.340089	0.117265	0.590169	0.584728
Bcin04g02000	606	yes	no	Cytochrome P450	Bfab04g02000	77	577	577	577	0.127063					>1	0.11108	0.32905	0.0993767	0.0978487	1.76278	0.480026	3.14686	1.08372	0.223931	1.00377	0.265881	1.14483
Bcin04g02320	492	yes	no	DYW family of nucleic acid deaminases	Bfab04g02320	321	321	313	313	0.652439					>1	0.410296	0.141833	0.0611781	0.0966666	4.64902	1.0718	0.217795	0.262517	0.162733	1.06986	3.09149	0.960878
Bcin04g02370	878	n.a.	no	Hypothetical	Bfab04g02370	111	824	824	824	0.126424					>1	23.8057	0.688951	0.857816	7.81962	14.3746	9.50934	1.25232	0.754736	2.49523	3.35546	8.14737	3.20102
Bcin04g02390	402	yes	no	SMP-30/Gluconolaconase/LRE-like region	Bfab04g02390	324	408	393	393	0.80597	Premature stop	Frameshift	315		1	0.623872	0.636007	0	0.07369	10.2303	2.31277	0	0.0650234	0	0.0963618	0.82955	0.198187
Bcin04g02610	215	n.a.	no	Hypothetical	Bfab04g02610	111	430	407	407	0.516279	Premature stop	Point mut.	112	TTA to TGA	1	0.312154	0.431452	0	0	0.261982	0.201118	0	0	0.675256	1.3318	1.44316	0.690044
Bcin04g02980	1032	yes	no	HET protein	Bfab04g02980	932	932	752	593	0.903101					>1	3.39404	0.296378	0.0875919	0.421231	0.846552	1.00916	1.99177	0.533502	1.19425	2.73425	2.09424	1.7096
Bcin04g03170	263	n.a.	no	Hypothetical membrane protein	Bfab04g03170	143	299	n.d.	n.d.	0.543726					>1	0.116262	0.0927005	0.0365291	0.0435032	0.915253	0.24085	0.426754	0.771576	0.850302	0.381147	2.14539	0.915034
Bcin04g03480	473	no	no	HET protein	Bfab04g03480	219	n.d.	n.d.	n.d.	0.463002					>1	2.33623	0.470471	0.318152	0.767933	9.30323	2.6392	0	0.222449	0.459648	0.576903	0.327454	0.317291
Bcin04g03800	664	n.a.	no	Hypothetical	Bfab04g03800	231	158	739	739	0.347892					>1	0.948704	0	0.045196	0.178004	4.12107	1.05859	0	0.0994216	0.0894032	0.24693	2.87287	0.661724
Bcin04g03940	314	yes	no	Pyridine nucleotide-disulphide oxidoreductase	Bfab04g03940	36	196	196	196	0.11465					>1	0.0906944	0	0	0	1.22877	0.263894	0	0	0	0	0	0
Bcin04g03950	572	yes	no	MFS_multidrug_transporter	Bfab04g03950	407	536	536	536	0.711538	N-Terminus	Frameshift	143		1	0	0.0696752	0	0	0.123774	0.0386899	0.257831	1.50207	0.171241	1.4968	3.10065	1.30572
Bcin04g04530	245	n.a.	no	Hypothetical	Bfab04g04530	147	147	103	103	0.6	N-Terminus	Point mut.	71	GGA to TGA	1	1.47509	1.18662	1.86653	2.33875	2.81103	1.93561	0.236926	0.428364	1.06216	2.32766	0	0.811022
Bcin04g04560	425	n.a.	no	Hypothetical	Bfab04g04560	214	337	94	94	0.503529					>1	0.269516	1.66421	0.569072	1.07194	0.841168	0.883182	1.63093	0.78633	1.13736	3.27742	4.24421	2.21525
Bcin04g04680	289	yes	no	Short chain dehydrogenase	Bfab04g04680	179	468	463	463	0.619377	Loss of start codon	Point mut.	1	ATG to ATA	1	15.316	0.0688343	0.624017	10.2896	1.86257	5.6322	0.962149	0.193286	0.239634	0.716103	0.663893	0.555013
Bcin04g05530	575	n.a.	yes	Hypothetical	Bfab04g05530	453	575	575	575	0.787826	Premature stop	Deletion	443		1	0.535691	0.161795	0.157088	0.309345	0.851084	0.403	0.144004	0.867869	0.179329	0.482304	1.49046	0.632794
Bcin04g06130	474	n.a.	no	Hypothetical	Bfab04g06130	341	750	474	474	0.719409	N-Terminus	Deletion			1	0.111876	0.38543	0	0	0.350108	0.169483	0	0.185374	0.102144	15.7962	0	3.21673
Bcin04g06340	1102	yes	no	Tetratricopeptide repeats protein	Bfab04g06340	613	1100	1100	1100	0.556261	Premature stop	Frameshift	388		1	0.63327	0.512338	0.128071	0.0630511	2.84497	0.83634	0.0571091	0.912576	0.097017	0.239993	3.02876	0.867091
Bcin04g06460	675	n.a.	no	Hypothetical	Bfab04g06460	561	561	561	561	0.831111					>1	0.51559	0	0.0535716	0.105496	0.0292234	0.140776	0.169033	0.135828	0.348466	2.3273	0.413747	0.678875
Bcin04g06860	569	yes	yes	FAD/FMN-containing dehydrogenase	Bfab04g06860	484	402	402	402	0.850615	Premature stop	Point mut.	485	CAG to TAG	1	16.9713	0.560535	0	4.00327	7.23481	5.75398	2.38586	0.958593	1.08041	0.936299	25.2286	6.11795
Bcin05g00600	551	yes	no	Fungal specific transcription factor (SUC1 sucrose utilizing protein)	Bfab05g00600	497	551	551	551	0.901996					>1	9.65291	5.39203	4.98685	6.94323	63.4364	18.0823	14.2854	4.32258	11.3351	10.4324	49.2074	17.9166
Bcin05g01300	484	no	no	Ankyrin repeats protein	Bfab05g01300	172	627	1856	727	0.355372					>1	0.319733	0.437157	0.876251	1.82684	5.47983	1.78796	0.0878822	0.403199	0.175104	0.443719	0.963224	0.414626
Bcin05g01720	826	n.a.	no	Hypothetical	Bfab05g01720	426	521	670	670	0.515738					>1	3.27077	0.68827	0	0.0793424	15.4278	3.89324	0.236748	0.237801	0	0.0352411	3.2205	0.746057
Bcin05g01730	1020	n.a.	no	Hypothetical	Bfab05g01730	326	417	707	707	0.319608					>1	1.31961	0.358627	0.0886214	0.0351803	20.5872	4.47784	0.101052	0.304504	0	0	2.39063	0.559238
Bcin05g01900	267	n.a.	no	Hypothetical	Bfab05g01900	205	205	205	205	0.76779	Premature stop	Point mut.	206	CAG to TAG	1	1.33471	1.31646	0.450162	0.97671	3.52045	1.5197	0.758982	2.56153	0.302452	0.67787	4.04002	1.66817
Bcin05g02560	491	n.a.	no	Hypothetical	Bfab05g02560	281	498	498	498	0.572301	Premature stop	Point mut.	282	CGA to TGA	1	0.49823	0.743993	0.24521	0.217583	0.253115	0.391626	0	0.562287	0.348558	0.520803	0.0689759	0.300125
Bcin05g02710	510	yes	no	Cytochrome P450	Bfab05g02710	320	427	427	427	0.627451					>1	1.45001	0.990225	0.270258	0.897398	3.20576	1.36273	1.94805	2.11326	1.64963	3.17526	0.864115	1.95006
Bcin05g02900	416	yes	no	Phosphotransferase	Bfab05g02900	302	298	298	298	0.725962					>1	0	0.886011	0.0723281	0	6.91387	1.57444	0	0.278978	0.288228	0.310075	1.64267	0.503991
Bcin05g03170	547	yes	no	Amino acid permease	Bfab05g03170	308	462	540	540	0.563071					>1	0.237194	0.171944	0	1.23855	8.20727	1.97099	0.264309	0	0.493717	0.53114	5.823	1.42243
Bcin05g03180	240	no	no	Methyltransferase	Bfab05g03180	128	198	242	242	0.533333					>1	1.85645	0.0691033	0	5.89482	1.42982	1.85004	2.44639	0.327637	6.09301	0.60693	1.60766	2.21633
Bcin05g03410	349	yes	no	Cupin domain	Bfab05g03410	219	219	312	312	0.627507					>1	3.98017	10.0618	4.65338	4.04767	2.63031	5.07466	27.4007	5.52846	6.88379	6.75651	4.93221	10.3003
Bcin05g03700	1129	n.a.	no	Hypothetical	Bfab05g03700	1013	1111	1111	1111	0.897254	Premature stop	Point mut.	1014	TGG to TAG	1	10.2254	17.3526	17.2157	13.909	13.8153	14.5036	7.29656	25.5092	10.9554	15.9059	16.2392	15.1812
Bcin05g03810	422	n.a.	no	Hypothetical	Bfab05g03810	149	147	122	122	0.353081					>1	0.285027	0.448452	0	0.155121	2.2138	0.620479	0	0.23308	0.481617	0.259061	0.800577	0.354867
Bcin05g03820	232	yes	no	Nitroreductase	Bfab05g03820	120	120	120	120	0.517241					>1	5.27489	3.22818	0	0.563229	104.821	22.7775	2.31835	7.85923	14.2909	10.4823	9.08392	8.80694
Bcin05g03880	502	yes	no	Cytochrome P450	Bfab05g03880	278	278	438	438	0.553785					>1	15.0399	2.7174	2.6287	7.91594	5.68267	6.79692	2.93841	1.27504	2.75173	4.56642	1.59885	2.62609
Bcin05g04280	594	yes	no	Chitin synthase	Bfab05g04280	443	344	406	406	0.745791					>1	7.19562	91.464	43.1376	21.5268	4.81381	33.6276	6.12566	16.4989	10.6608	7.66617	3.39931	8.87017
Bcin05g04300	498	yes	no	Fringe-like; glucosaminyltransferase	Bfab05g04300	242	242	450	450	0.485944	Premature stop	Frameshift	233		1	16.3745	98.8804	42.068	30.4658	8.5409	39.2659	11.1046	43.6488	19.0593	20.5214	9.75039	20.8169
Bcin05g04560	707	no	no	Ankyrin repeats protein	Bfab05g04560	76	1756	1804	1804	0.107496					>1	3.03444	0.217984	0.101296	0.510326	0.957831	0.964376	0.910779	0.274449	1.36104	4.27058	1.34667	1.6327
Bcin05g04580	501	yes	no	Catalase Bccat6	Bfab05g04580	221	487	487	487	0.441118	Premature stop	Point mut.	222	CGA to TGA	1	4.46448	5.55821	0.633147	2.5692	15.7164	5.78829	0.12971	2.42334	24.8754	0.347544	31.4534	11.8459
Bcin05g04620	424	yes	no	O-methyltransferase	Bfab05g04620	263	305	366	366	0.620283					>1	2.14444	1.66808	1.9161	1.0824	2.09277	1.78076	0.996584	0.73408	1.59958	0.84063	0.916871	1.01755
Bcin05g04960	321	yes	no	Nitrilase/ carbon-nitrogen hydrolase	Bfab05g04960	58	67	322	322	0.180685					>1	5.26339	0.175707	0.0936672	0.630654	1.63258	1.5592	0	0	0.297727	0	4.94902	1.04935
Bcin05g05010	356	n.a.	no	Hypothetical membrane protein	Bfab05g05010	177	356	338	338	0.497191					>1	1.77339	0.438379	3.29488	1.52466	4.33606	2.27347	0.605439	0.547319	0.67856	0.405552	1.7904	0.805453
Bcin05g05120	304	yes	no	Short chain dehydrogenase	Bfab05g05120	142	142	142	142	0.467105	N-terminus	Point mut.	40	GGA to TGA	1	108.303	0.491054	0	7.44304	0.0269892	23.2528	0	0	0.423262	0	2.83022	0.650697
Bcin05g05640	360	n.a.	no	Hypothetical	Bfab05g05640	212	288	288	288	0.588889					>1	1.08813	0.588074	0.166481	0.426975	4.872	1.42833	0.956318	1.81137	0.816621	2.1963	1.29281	1.41468
Bcin05g05690	330	yes	no	Short chain dehydrogenase	Bfab05g05690	48	297	287	287	0.145455	Premature stop	Frameshift	47		1	21.903	1.97052	8.38307	17.1504	58.5272	21.5868	1.43122	1.29383	2.13877	1.27827	2.1162	1.65166
Bcin05g06170	219	no	no	C2H2-type zinc finger transcription factor (trunc.)	Bfab05g06170	138	324	222	222	0.630137					>1	0	1.86087	0	0	205.62	41.4962	0.252266	0	0	0	14.3232	2.91509
Bcin05g06350	711	yes	no	Ankyrin repeats protein	Bfab05g06350	310	711	711	711	0.436006	Premature stop	Frameshift	81		1	0.691788	1.17833	0.0847214	0.217286	0.311143	0.496653	1.65892	0.117621	0.0486084	0.174309	0.692574	0.538406
Bcin05g06470	263	n.a.	no	Hypothetical membrane protein	Bfab05g06470	199	589	801	801	0.756654					>1	0.657982	0.264862	0.685473	0.745639	4.60723	1.39224	0	0	0	0	12.145	2.42899
Bcin05g06570	327	n.a.	no	Hypothetical	Bfab05g06570	226	326	326	326	0.691131	Premature stop	Deletion	227		1	0.21775	21.7268	5.14941	0.838137	5.91498	6.76942	0.0793924	0.287084	0.118641	0.673624	0.375645	0.306877
Bcin05g06640	239	n.a.	no	Hypothetical	Bfab05g06640	139	121	130	87	0.58159	C-terminus	Deletion	114		1	7.12419	0.289193	0.113958	0	0.0622044	1.51791	0.221463	0.400407	0.220631	2691.5	0.261963	538.521
Bcin05g06850	828	yes	no	HET protein	Bfab05g06850	200	1167	627	1100	0.241546	N-Terminus	Deletion			1	0.173518	0.056152	0	0.265929	1.89036	0.477192	0	0.525687	0.260696	0.233713	0.309534	0.265926
Bcin05g07210	181	n.a.	no	Hypothetical	Bfab05g07210	81	181	181	181	0.447514	Premature stop	Frameshift	80		1	5.66683	6.58586	0.165719	7.42659	9.49575	5.86815	0	5.92744	2.13008	4.58306	6.32279	3.79267
Bcin05g07560	168	n.a.	no	Hypothetical	Bfab05g07560	102	525	525	525	0.607143					>1	2.30423	5.16948	0.621339	2.89542	9.9757	4.19323	1.36175	2.05171	2.20453	1.82433	1.40943	1.77035
Bcin05g07590	210	yes	no	GMC oxidoreductase	Bfab05g07590	68	975	561	561	0.32381					>1	0.788196	0.663502	0.678861	3.8141	11.5262	3.47417	0	0	0.25314	0	0	0.0506279
Bcin05g08160	445	yes	no	GDP-fucose protein O-fucosyltransferase	Bfab05g08160	310	290	290	290	0.696629					>1	2.29721	2.01512	0.13525	0.199756	0.0514522	0.939757	0	0	0	0	0	0
Bcin05g08210	385	n.a.	no	Hypothetical	Bfab05g08210	228	385	385	385	0.592208					>1	0.0370061	0	0	0	0	0.00740123	0.306244	0.276846	0.0762735	0.478653	0	0.227603
Bcin06g00050	785	yes	no	N-acetylglucosaminidase	Bfab06g00050	171	531	503	565	0.217834					>1	0.376559	0.169361	0.0767451	1.85422	3.90315	1.27601	0.320228	0	0	0.858016	0.946975	0.425044
Bcin06g00340	2239	yes	no	Ankyrin repeats protein	Bfab06g00340	1819	1204	2093	1204	0.812416					>1	0.767812	1.16192	0.740556	0.85966	1.62568	1.03112	0.182124	0.241474	0.108864	0.341587	0.517033	0.278216
Bcin06g00490	398	yes	yes	Glycosyl hydrolase family 12	Bfab06g00490	284	368	368	368	0.713568	Premature stop	Point mut.	285	TCG to TAG	1	6.2612	0.683837	0.907093	1.24295	0.175882	1.85419	1.66316	1.12763	5.28141	11.7441	2.09027	4.38131
Bcin06g00570	790	n.a.	no	Hypothetical	Bfab06g00570	555	794	794	794	0.702532	Premature stop	Point mut.	556	GAA to TGA	1	0.111888	2.95951	0.0787489	0.038769	0.0401923	0.645823	0.0630665	0.0380083	0.471222	0.0563266	0.410299	0.207784
Bcin06g00630	546	yes	yes	Serine carboxypeptidase (S10)	Bfab06g00630	456	504	506	506	0.835165					>1	19.3482	0.395381	0.0551386	1.41544	18.1719	7.87722	0.854502	0.630211	1.42643	1.59442	5.78131	2.05737
Bcin06g00650	487	yes	no	Cytochrome P450	Bfab06g00650	283	284	265	265	0.581109					>1	2.39691	0.361605	0	0.0608547	0.0314273	0.57016	0	0	0.0516764	0	0	0.0103353
Bcin06g01450	798	yes	no	Tetratricopeptide repeats protein	Bfab06g01450	654	756	772	772	0.819549	Premature stop	Frameshift	74		1	1.63978	2.78133	1.5252	1.61366	8.13821	3.13964	1.60603	5.19443	3.11999	9.1084	10.1319	5.83215
Bcin06g01570	898	n.a.	no	Hypothetical	Bfab06g01570	357	357	421	421	0.39755					>1	0.106779	0	0.0670986	0.205122	0	0.0757998	0.13644	1.28634	2.60752	1.96301	0.933994	1.38546
Bcin06g01990	564	n.a.	no	Hypothetical	Bfab06g01990	172	172	230	230	0.304965					>1	6.36507	3.49383	6.58558	6.45341	4.0039	5.38036	3.14844	14.9565	5.16619	2.39844	1.64304	5.46253
Bcin06g02050	615	n.a.	no	Hypothetical	Bfab06g02050	231	289	289	289	0.37561					>1	0.703118	0.513306	0	0.125574	2.94126	0.856652	0.14026	0.253591	0	0.375811	0.66364	0.28666
Bcin06g02740	188	no	no	AMP-binding enzyme	Bfab06g02740	104	758	1073	1055	0.553191					>1	0.546373	0.241404	0.13668	0.403737	0.766686	0.418976	0.710777	0	0.708106	0.211605	0.42038	0.410174
Bcin06g02790	405	n.a.	no	Hypothetical	Bfab06g02790	302	301	301	301	0.745679					>1	0.23693	0	0	0	0.237159	0.0948179	0	0	0.230583	0.155038	0	0.077124
Bcin06g02840	550	n.a.	no	Hypothetical	Bfab06g02840	303	550	398	398	0.550909	Premature stop	Point mut.	304	TAC to TAA	1	0.348436	0	0	0.107793	0.126256	0.116497	0.115345	0.0695152	0.114912	2.57546	0.204659	0.615978
Bcin06g02880	217	n.a.	no	Hypothetical	Bfab06g02880	131	196	196	196	0.603687	N-Terminus	Frameshift	57		1	1.86627	8.76545	0.138352	2.48059	2.53616	3.15737	0.681609	8.62649	0.113175	0.101461	0.268753	1.9583
Bcin06g03250	174	n.a.	no	Membrane-associating domain	Bfab06g03250	52	160	111	111	0.298851	Premature stop	Point mut.	53	TAC to TAA	1	8.62646	0.551438	0.68939	1.36566	2.31025	2.70864	0.95199	0.286868	2.13393	1.48794	1.68913	1.30997
Bcin06g03600	195	yes	no	Acetyltransferase (GNAT)	Bfab06g03600	140	140	140	140	0.717949	N-Terminus	Deletion			1	1.64715	0.4586	3.23152	6.78356	0.581375	2.54044	0.746063	0.299753	1.23877	2.22111	0.44125	0.989388
Bcin06g03720	440	yes	no	Monocarboxylate MFS transporter	Bfab06g03720	392	441	441	441	0.890909					>1	0.120501	0.0452652	0	0.0407246	0.476666	0.136631	0.948414	0.381054	1.29917	2.54117	0.514184	1.1368
Bcin06g04420	514	yes	no	Cytochrome P450	Bfab06g04420	270	483	462	462	0.525292	Premature stop	Frameshift	269		1	16.996	0.21972	0.0585647	0.301775	1.51862	3.81894	0	0	0.193357	22.7659	5.20382	5.63262
Bcin06g04540	386	yes	no	O-methyltransferase	Bfab06g04540	318	194	194	194	0.823834					>1	2.74783	0.0430333	0.545545	7.16095	0.40807	2.18109	0.549799	1.04927	0.775956	0.572883	0	0.589581
Bcin06g04550	396	yes	no	Fungal specific transcription factor	Bfab06g04550	262	287	368	368	0.661616					>1	14.2706	5.90252	13.0672	15.2271	3.99458	10.4924	1.9999	2.49092	2.0588	3.51281	2.91762	2.59601
Bcin06g04610	674	yes	no	Fungal specific transcription factor (GAL4-like Zn2Cys6 )	Bfab06g04610	297	249	505	505	0.440653					>1	2.12136	4.23623	6.65772	1.68335	1.07022	3.15378	0	0.183584	0.151737	0.816192	0.180163	0.266335
Bcin06g05100.2	495	n.a.	no	Hypothetical	Bfab06g05100	388	971	920	920	0.783838					>1	2.90559	0.693967	2.32157	1.88036	2.55103	2.0705	1.80623	0.740222	1.83544	4.67828	2.4784	2.30771
Bcin06g05220	378	yes	no	Zinc-binding dehydrogenase	Bfab06g05220	321	369	321	321	0.849206	Premature stop	Frameshift	63		1	18.4947	7.66724	2.14866	3.83983	18.6348	10.157	1.30677	1.77199	1.46459	2.13971	2.25421	1.78745
Bcin06g05790	340	n.a.	no	Hypothetical	Bfab06g05790	275	258	258	258	0.808824	N-terminus	Deletion			1	7.60911	0.0549634	0.696785	7.45344	23.7792	7.91869	0.429806	0	0.107048	0.479841	8.13451	1.83024
Bcin06g06350	203	yes	no	Flavodoxin	Bfab06g06350	139	254	254	203	0.684729					>1	101.722	43.6619	3.50603	135.424	58.7545	68.6137	5.56447	3.67292	7.85338	2.12991	34.2425	10.6926
Bcin06g06860	409	yes	no	Phosphotransferase	Bfab06g06860	322	409	801	409	0.787286	Premature stop	Deletion	314		1	0.0696799	0.0812385	0	0	0.516638	0.133511	0	0.130852	0.108152	0.145438	0.0642067	0.0897298
Bcin06g07040	402	n.a.	no	Hypothetical	Bfab06g07040	230	230	477	471	0.572139	N-Terminus	Deletion			1	3.52703	0	0.0840134	0.746463	0.435454	0.958592	2.12515	0.731865	2.8733	6.30419	1.70579	2.74806
Bcin06g07120	454	yes	no	Salicylate hydroxylase	Bfab06g07120	283	419	419	419	0.623348					>1	235.312	10.4409	33.6078	9.08347	9.57403	59.6036	0.181058	0.872948	2.07435	0.444699	0.107085	0.736028
Bcin07g00080	124	no	no	Beta-lactamase	Bfab07g00080	61	103	309	309	0.491935					>1	0	0.133231	0	0	0	0.0266462	0	0	0	0	0	0
Bcin07g00270	310	yes	no	Alpha/beta hydrolase	Bfab07g00270	213	n.d.	213	213	0.687097	N-Terminus	Point mut.	62	CGA to TGA	1	20.3441	7.8883	2.52148	3.79999	10.7254	9.05585	1.96626	1.08626	2.12211	4.09763	3.29494	2.51344
Bcin07g00580	166	no	no	Cytochrome P450	Bfab07g00580	91	n.d.	547	547	0.548193	Premature stop	Point mut.	92	AAA to TAA	1	2.73354	8.76945	8.96754	6.22867	4.73926	6.28769	0.10509	0.190003	0.157043	0.422365	0.124308	0.199762
Bcin07g00860	473	n.a.	no	Hypothetical	Bfab07g00860	406	n.d.	n.d.	n.d.	0.858351	Premature stop	Frameshift	399		1	0	0	0	0	0.361022	0.0722043	0	0	0.117401	0.0350832	2.64849	0.560195
Bcin07g00920	310	yes	no	NAD dependent epimerase/dehydratase family	Bfab07g00920	207	n.d.	293	293	0.667742	Premature stop	Frameshift	170		1	10.8715	1.05926	0	1.43915	1.25771	2.92552	0.842908	1.72718	0.671793	1.58094	0.797644	1.12409
Bcin07g01570	310	yes	no	Methyltransferase	Bfab07g01570	242	n.d.	310	310	0.780645	N-terminus	Deletion			1	0.420753	2.22634	2.03658	0.710708	29.3485	6.94857	0.0912359	0.10997	0.363572	0.366685	0.161881	0.218669
Bcin07g02200	199	no	no	T-complex protein 11	Bfab07g02200	166	166	691	691	0.834171					>1	0	0.349618	0	0	0	0.0699236	0	0	0	0	0.322364	0.0644728
Bcin07g02660	206	n.a.	no	Hypothetical	Bfab07g02660	114	224	224	224	0.553398	Premature stop	Frameshift	112		1	0.188624	0.177747	0	0.231343	0.764766	0.272496	0	0.367524	0.151884	0.136163	0.721348	0.275384
Bcin07g02720	791	n.a.	no	Hypothetical	Bfab07g02720	508	791	791	791	0.642225	Premature stop	Point mut.	509	GAA to TAA	1	0.242409	0.979372	0.152327	0.347107	8.14023	1.97229	0.0610534	0.80949	0.091236	0.408964	1.76935	0.62802
Bcin07g03520	273	yes	no	Haloacid dehalogenase-like hydrolase	Bfab07g03520	201	227	227	227	0.736264	N-Terminus	Frameshift	62		1	42.8841	45.0975	46.0779	44.2877	9.92311	37.6541	39.5482	30.8787	53.8355	59.7036	13.6364	39.5205
Bcin07g03660	157	n.a.	no	Hypothetical	Bfab07g03660	51	157	1583	1583	0.324841	Premature stop	Point mut.	52	GAA to TAA	1	2.74127	14.3487	3.05426	3.42706	3.84929	5.48413	0.674327	4.47036	1.00769	1.80678	2.39293	2.07042
Bcin07g03960	175	n.a.	no	Hypothetical	Bfab07g03960	106	152	79	152	0.605714	Premature stop	Frameshift	94		1	0	0.201636	0	0.12094	0.162359	0.096987	0	0.311537	5.92234	0.230842	0.458597	1.38466
Bcin07g03970	397	n.a.	no	Hypothetical (RING-CH finger)	Bfab07g03970	303	193	281	281	0.763224	N-Terminus	Point mut.	4	TGG to TGA	1	0.605861	0.275999	0.227343	1.27024	0.387858	0.553461	0	0.647577	0.856382	0.191936	0.571958	0.453571
Bcin07g04140	179	n.a.	no	Hypothetical	Bfab07g04140	107	474	n.d.	n.d.	0.597765	N-Terminus	Frameshift	83		1	0.157259	0.341995	0.110682	0.0329533	0.014175	0.131413	0.324676	0.391345	0.323456	0.144989	0	0.236893
Bcin07g05460	415	n.a.	no	Hypothetical	Bfab07g05460	180	398	398	398	0.433735					>1	13.4868	0.760088	0.870024	1.94411	144.999	32.4121	4.20114	1.47798	3.17194	6.99422	73.1388	17.7968
Bcin07g05630	681	yes	no	Fungal specific transcription factor (GAL4-like Zn2Cys6 )	Bfab07g05630	290	286	575	531	0.425844					>1	5.43753	4.51439	0.398017	1.52114	3.30129	3.03447	0.502924	0.707227	2.25466	1.60955	3.17278	1.64943
Bcin07g05640	606	yes	no	MFS_multidrug_transporter	Bfab07g05640	536	703	604	556	0.884488	Loss of start codon	Point mut.	1	ATG to AAG	1	0.642945	0.301613	0.0496883	0.235535	1.46779	0.539514	0.381314	0.0861774	0.617307	0.681126	1.24038	0.601261
Bcin07g05830	1321	yes	no	Non-ribosomal peptide synthase (truncated)	Bfab07g05830	682	1027	1160	1125	0.516276					>1	0.491438	0.0603992	0.0912582	0.112319	0.189006	0.188884	0.205359	0.247527	0.281307	0.275118	0.212549	0.244372
Bcin07g06830	1039	n.a.	no	Hypothetical	Bfab07g06830	333	393	333	333	0.3205	C-Terminus	Deletion			1	1.47683	0.105623	0.0290008	0.88656	6.69484	1.83857	1.54698	1.57329	1.54117	2.28837	14.1245	4.21486
Bcin08g00200	178	n.a.	no	Hypothetical	Bfab08g00200	85	186	186	186	0.477528	Premature stop	Point mut.	86	CAG to TAG	1	1.31196	0.297596	0.168496	1.1961	0.0890863	0.612648	0.323677	0.780281	0.483691	0.289085	0.574304	0.490208
Bcin08g00500	455	n.a.	no	Hypothetical	Bfab08g00500	391	455	455	455	0.859341	Premature stop	Frameshift	380		1	0.833289	3.57688	0.132284	1.57665	1.22953	1.46973	0.229516	2.35148	0.457308	1.84489	0.452482	1.06714
Bcin08g00970	531	n.a.	no	Hypothetical	Bfab08g00970	440	470	434	434	0.828625					>1	0	0.112567	0	0	1.78713	0.37994	0	0	0	0	6.70342	1.34068
Bcin08g01050	752	yes	no	HET protein	Bfab08g01050	457	577	457	457	0.607713					>1	0.856695	0.583368	0.0400542	0.655803	1.90876	0.808936	0.77143	0.464917	0.593865	1.34666	0.16591	0.668556
Bcin08g01070	564	yes	no	MFS_multidrug_transporter	Bfab08g01070	312	525	506	506	0.553191					>1	10.9999	0.0648068	0.106764	0.946102	1.5609	2.7357	1.34434	0.405098	0.558039	1.9511	0.397548	0.931225
Bcin08g01090	352	n.a.	no	Hypothetical	Bfab08g01090	93	883	873	873	0.264205					>1	19.6602	1.83834	1.62339	5.87732	16.4556	9.09098	2.61122	0.44963	0.557446	5.66382	7.72188	3.4008
Bcin08g01180	585	yes	no	Fungal Zn(2)-Cys(6) binuclear cluster domain	Bfab08g01180	477	465	477	477	0.815385					>1	1.8887	0.51681	0.257345	0.182681	0.0936028	0.587829	0.0528087	0	0.105221	0.047165	1.06192	0.253424
Bcin08g01290	351	n.a.	no	Hypothetical	Bfab08g01290	185	310	310	185	0.527066	Premature stop	Point mut.	186	CAG to TAG	1	1.28723	0.0473122	0.514105	0.135388	0.333247	0.463456	0.377043	0.113616	0.0939066	0.336748	0.668992	0.318061
Bcin08g02090	555	yes	no	GMC oxidoreductase	Bfab08g02090	222	425	425	425	0.4					>1	6.05012	0.706565	1.73587	13.1978	0.557627	4.4496	1.25794	5.87543	9.47741	30.1941	8.5559	11.0722
Bcin08g02400	181	no	no	Ornithine acetyltransferase family (ArgJ)	Bfab08g02400	56	1337	475	475	0.309392					>1	4.92849	0.998982	4.68336	4.47606	0.910122	3.1994	11.0732	0	0.612864	5.49431	4.00222	4.23651
Bcin08g02480	598	yes	no	Carboxylesterase	Bfab08g02480	539	539	539	539	0.901338					>1	0.225126	1.02261	0.050352	0.307854	0.170436	0.355276	0.974027	0.313076	0.776294	0.405969	1.26737	0.747347
Bcin08g02570	214	no	no	KR domain	Bfab08g02570	125	619	678	678	0.584112	Premature stop	Deletion			1	0.132878	0.30984	0	0.221659	0.53549	0.239973	0	0	0	0	0	0
Bcin08g03340	390	n.a.	no	Hypothetical	Bfab08g03340	138	138	203	203	0.353846					>1	0.073821	7.49106	0.46761	0.23021	0.7384	1.80022	0.504532	1.3683	0.502637	1.35184	0.745998	0.894661
Bcin08g03480	849	yes	no	Deaminase (OTT_1508-like)	Bfab08g03480	710	710	818	813	0.836278	Premature stop	Point mut.	711	TGG to TAG	1	2.08499	0.170969	0.24645	5.28539	83.7343	18.3044	0.240281	0.057924	0.0718134	0.278983	37.6026	7.65032
Bcin08g03560	573	no	no	Triterpene_cyclase	Bfab08g03560	290	701	643	643	0.506108					>1	0.134042	0.0581698	0.0439449	0.183172	0.229946	0.129855	0	0	1.38052	0	0.213802	0.318865
Bcin08g03570	495	yes	yes	Cytochrome P450	Bfab08g03570	140	n.d.	495	495	0.282828	Premature stop	Point mut.	141	TAC to TAA	1	2.00009	0.237023	0.110143	0.774378	3.06406	1.23714	0.396962	0.119619	0	0	0	0.103316
Bcin08g03590	305	no	no	Cytochrome P450	Bfab08g03590	199	192	254	254	0.652459					>1	0.126982	0.0652351	0	0	2.19747	0.477938	0	0.101113	0	0	0	0.0202226
Bcin08g04610	260	yes	no	Short chain dehydrogenase	Bfab08g04610.2	210	234	234	234	0.807692					>1	13.0741	67.6378	13.9826	14.0336	5.60155	22.8259	0.426185	4.11161	1.75134	2.41632	2.43771	2.22863
Bcin08g04740	322	n.a.	no	Hypothetical	Bfab08g04740	268	314	628	628	0.832298					>1	4.82066	5.86268	1.96092	3.08134	0.534145	3.25195	1.07102	6.8123	2.008	2.39834	1.23522	2.70498
Bcin08g05280	330	yes	yes	Metallo-beta-lactamase superfamily	Bfab08g05280	211	240	240	240	0.639394					>1	5.10641	0.68372	0.273361	0.882664	0.0727328	1.40378	2.05115	8.29999	8.39274	5.36499	3.20613	5.463
Bcin08g05370	353	n.a.	yes	Hypothetical	Bfab08g05370	195	195	195	195	0.552408					>1	16.0906	0.0940898	0.0852001	0.25167	0.512365	3.40678	2.37059	2.4109	1.91887	1800.32	5.25771	362.456
Bcin08g05750	242	no	no	HET protein	Bfab08g05750	126	375	322	322	0.520661	Loss of start codon	Point mut.	1	ATG to ATA	1	0.117567	0.0685346	0.248237	0.343933	0.718023	0.299259	0	0	0	0.123298	0	0.0246595
Bcin08g06180	608	yes	no	Hsp70 protein family (HSP12A/B)	Bfab08g06180	546	548	546	546	0.898026					>1	0.0234555	0.333401	0	0	0.296575	0.130686	0.701592	0.0792803	0.196581	0.0979083	0.259343	0.266941
Bcin08g06340	242	n.a.	no	Hypothetical	Bfab08g06340	122	226	216	216	0.504132	N-Terminus	Point mut.	72	CAG to TAG	1	1.00876	0.301365	0	0.906682	0.428037	0.528969	0.570162	1.7181	1.13604	1.40038	1.34886	1.23471
Bcin09g00300	311	yes	yes	Deoxyribonuclease NucA/NucB	Bfab09g00300	66	293	293	293	0.212219					>1	1.64274	1.60024	0.676685	5.17385	22.1751	6.25373	0	1.57706	2.34626	5.14169	3.09534	2.43207
Bcin09g00310	513	n.a.	no	Hypothetical	Bfab09g00310	289	488	495	495	0.563353	Premature stop	Frameshift	196		1	0.580292	8.32142	0.0586787	0.0349408	58.2746	13.454	1.45096	7.28711	3.49333	5.56157	11.6566	5.88992
Bcin09g01140	439	yes	no	SNF2 family N-terminal domain	Bfab09g01140	250	325	480	480	0.569476					>1	1.29264	2.10745	1.48332	0.953966	2.54225	1.67593	0	0.0789512	0.13051	0	0.0774798	0.0573883
Bcin09g01590	2046	yes	no	Ankyrin repeats protein	Bfab09g01590	1781	1977	1977	1977	0.870479					>1	0.439529	0.644462	0.0203514	0.192942	8.79307	2.01807	0.0641922	0.338509	0.151884	0.136163	0.778297	0.293809
Bcin09g02220	474	no	no	Cytochrome P450	Bfab09g02220	411	220	411	411	0.867089					>1	0.684499	0.0840503	0	0.932141	0.2318	0.386498	0	0.114162	0	0.0845913	0.0373447	0.0472196
Bcin09g02290	366	yes	no	Cyclase family	Bfab09g02290	172	172	299	299	0.469945	Premature stop	Frameshift	170		1	24.3662	31.9291	4.35565	7.45487	184.847	50.5905	0.855243	1.23703	2.55609	5.27052	3.64193	2.71216
Bcin09g02700	465	yes	no	Fungal Zn(2)-Cys(6) binuclear cluster domain	Bfab09g02700	191	359	152	152	0.410753					>1	5.10701	3.70036	5.76033	6.28292	0.808593	4.33184	8.21836	36.4317	16.102	11.581	14.0419	17.275
Bcin09g02990	349	n.a.	no	Hypothetical	Bfab09g02990	194	194	249	249	0.555874					>1	0.081625	0.266268	0	0.0848488	0.112603	0.109069	0	0.216745	0.0895724	0.160603	0.106353	0.114655
Bcin09g03070	286	yes	no	Methyltransferase	Bfab09g03070	135	135	233	233	0.472028					>1	2.5404	5.7976	0.31527	1.20572	1.24118	2.22004	0.515662	0.776934	0.642155	242.02	6.86209	50.1635
Bcin09g03080	424	n.a.	no	Hypothetical	Bfab09g03080	371	408	408	408	0.875	Premature stop	Frameshift	60		1	0	33.2062	0.141933	0	30.8865	12.8469	0	0	0.0445199	0.359208	24.6856	5.01787
Bcin09g03120	198	n.a.	no	Hypothetical	Bfab09g03120	46	596	396	372	0.232323					>1	6.00411	43.837	3.4252	4.27053	13.5934	14.226	0	0.328486	0.543004	0.486802	1.28946	0.52955
Bcin09g03450	1240	n.a.	no	Hypothetical	Bfab09g03450	1120	1120	1322	1322	0.903226					>1	0.202595	0.214533	0.121518	0.105747	1.27893	0.384664	0.209552	0.216498	0.134206	0.441156	0.3364	0.267562
Bcin09g03470	842	yes	no	Ankyrin repeats protein	Bfab09g03470	699	606	606	606	0.830166					>1	2.08762	0.533129	0.250446	1.42471	1.95644	1.25047	1.37452	2.99806	2.12681	5.18096	5.62158	3.46039
Bcin09g03490	894	yes	yes	Glycosyl hydrolases family 16/ beta-1,3-1,4-glucanase	Bfab09g03490	478	478	478	478	0.534676	Internal	Deletion	352		1	14.9041	1.43038	12.7765	12.5229	10.752	10.4772	25.2935	2.46243	2.87521	0.608202	1.18909	6.48568
Bcin09g03630	317	yes	no	Triphenylmethane reductase (TMR)	Bfab09g03630	107	107	176	176	0.337539	Premature stop	Point mut.	108	GAG to TAG	1	0.925388	81.3057	1.80206	4.45499	2.73729	18.2451	0.324676	0.782689	2.74938	1.3049	0.192026	1.07073
Bcin09g04420	1118	yes	yes	WSC domain	Bfab09g04420	949	509	949	949	0.848837					>1	0.996753	1.13925	0.754695	0.31417	3.24952	1.29088	1.37317	0.768458	0.989368	1.09502	3.72717	1.59064
Bcin09g04460	503	yes	no	Monocarboxylate MFS transporter	Bfab09g04460	183	474	474	474	0.363817					>1	0.823095	1.20858	0.119686	0.353537	3.69969	1.24092	0.171887	2.27901	0.684966	1.22814	1.42325	1.15745
Bcin09g04840	200	yes	no	Tetratricopeptide repeat/ MYND finger protein	Bfab09g04840	104	102	1262	1262	0.52	Premature stop	Deletion	75		1	1.83926	0.712216	0	0.089351	2.15678	0.959521	0	0.160908	0	0	0	0.0321816
Bcin09g05140	425	no	no	HET protein	Bfab09g05140	282	314	425	425	0.663529	Premature stop	Frameshift	282		1	1.11695	1.98907	0.157429	0.612837	10.8178	2.93883	1.28144	4.63373	0.580287	1.6127	0.964593	1.81455
Bcin09g05320	399	n.a.	no	Hypothetical	Bfab09g05320	164	265	225	225	0.411028					>1	0.408548	0.657317	0.150804	0.148485	0.319444	0.33692	2.97521	1.40884	1.48202	2.75215	3.89637	2.50292
Bcin09g05330	485	yes	no	Major Facilitator Superfamily (Bcbik6)	Bfab09g05330	320	219	537	537	0.659794					>1	2.41256	0.349246	0.372356	1.4994	6.11295	2.1493	2.77285	1.09667	1.5107	1.89608	2.10121	1.8755
Bcin09g05410	246	n.a.	no	Hypothetical	Bfab09g05410	76	443	546	546	0.308943	Premature stop	Point mut.	77	CGA to TGA	1	0.488122	0.0674247	0	0	1.84476	0.480061	0	0.17417	0.143956	0.258112	0.170924	0.149432
Bcin09g05510	1180	yes	no	P-type ATPase, heavy metal transporting (Bcpca1)	Bfab09g05510	1050	1070	1008	1008	0.889831					>1	2.04136	0.890567	0.979003	0.97095	1.58241	1.29286	0.115282	0.0173693	0.0430684	0.051481	0	0.0454402
Bcin09g05680	483	n.a.	no	Hypothetical	Bfab09g05680	376	373	373	373	0.778468	N-terminus	Deletion			1	0	0.0385862	0	0	0.107964	0.02931	0.166711	0.200944	0.0415213	0.148895	0.0492997	0.121474
Bcin09g05780	145	n.a.	no	Hypothetical	Bfab09g05780	87	75	655	655	0.6	Premature stop	Frameshift	49		1	2.79143	3.76249	1.39442	1.22406	3.71304	2.57709	3.26263	0	1.70023	1.25094	1.81548	1.60585
Bcin09g05830	280	n.a.	no	Hypothetical	Bfab09g05830	223	236	280	280	0.796429					>1	7.961	0.540192	1.78894	2.02233	18.2948	6.12145	2.13865	1.77224	0.599236	2.62638	3.24125	2.07555
Bcin09g06060	315	yes	yes	SUR7/PalI family protein	Bfab09g06060	102	195	326	326	0.32381					>1	0.730521	1.7695	0.0954457	0.0939781	5.6773	1.67335	0	1.4362	0.169579	1.36824	2.81886	1.15858
Bcin09g06740	300	n.a.	no	Hypothetical	Bfab09g06740	246	300	300	300	0.82	N-Terminus	Frameshift	41		1	0	0	0	0	0	0	0.283927	0	0.707151	0	1.17548	0.433311
Bcin09g06890	408	yes	no	Membrane bound O-acyl transferase	Bfab09g06890	102	283	802	802	0.25					>1	0.329708	0.0488067	0.368714	0.131733	0.112493	0.198291	0	0.615513	0.339158	1.21622	1.40943	0.716064
Bcin10g00910	256	yes	no	O-methyltransferase	Bfab10g00910	159	115	277	277	0.621094					>1	0.111162	0.194403	0	0	0	0.0611132	0	0	0	0	0	0
Bcin10g01280	766	n.a.	no	Hypothetical	Bfab10g01280	681	411	546	546	0.889034	Premature stop	Frameshift	675		1	0.559484	0.603059	0	0.745606	3.87603	1.15684	0.259527	0.28675	0.237006	0.521531	0.383735	0.33771
Bcin10g01790	628	n.a.	no	Hypothetical	Bfab10g01790	539	401	401	401	0.85828	Premature stop	Frameshift	537		1	0	0	0	0	0	0	0.0649352	0.117403	0.226419	0.347973	0.115215	0.174389
Bcin10g01800	590	n.a.	no	Hypothetical	Bfab10g01800	414	405	391	391	0.701695					>1	0	0.0901349	0	0	0.0259501	0.023217	0.0844939	0.0509219	0.210441	0.113196	0.0999458	0.1118
Bcin10g01860	636	n.a.	no	Hypothetical	Bfab10g01860	557	218	557	557	0.875786					>1	0.629872	0.0474299	0.234411	0.501911	0.369168	0.356558	0.0550759	0.199155	0.0823035	0.29514	0.032574	0.13285
Bcin10g02040	677	yes	no	SAP domain DNA binding protein	Bfab10g02040	355	605	606	606	0.524372	Premature stop	Point mut.	356	TAC to TAA	1	0.283587	0.0835713	0.178203	0.140788	3.83695	0.904619	0.683084	9.36559	0.467856	2.21155	11.1605	4.77773
Bcin10g02050	787	yes	no	Dynamin_like protein family, GTPase	Bfab10g02050	191	191	647	647	0.242694	Premature stop	Point mut.	192	AGA to TGA	1	1.10267	0	0	0.18997	19.6222	4.18297	0	0.110066	0.181944	0.489337	30.7841	6.31309
Bcin10g03710	145	n.a.	no	Hypothetical	Bfab10g03710	71	71	71	71	0.489655	Premature stop	Frameshift	67		1	4.21516	0.524245	0.206581	2.73917	0.649664	1.66697	0	0.293508	0.970368	0.434967	3.16842	0.973453
Bcin10g03850	574	no	no	HET protein	Bfab10g03850	373	597	496	496	0.649826					>1	0.451154	0.53245	0	0.248643	13.7976	3.00596	0	0.508539	0	0.125605	0.776317	0.282092
Bcin10g04200	169	no	no	Cytochrome P450	Bfab10g04200	75	565	565	565	0.443787					>1	0.228568	0.0979641	0	0.211289	4.75917	1.0594	0	0	0	0	0.818635	0.163727
Bcin10g04660	1252	yes	no	Response regulator receiver domain	Bfab10g04660	908	1707	1274	1274	0.72524	Premature stop	Frameshift	886		1	5.54099	9.86062	4.64634	5.9585	13.9214	7.98557	2.30229	15.7081	4.60145	12.9721	7.34626	8.58605
Bcin10g04730	276	n.a.	no	Hypothetical	Bfab10g04730	77	465	674	585	0.278986	Premature stop	Point mut.	78	TGG to TAG	1	3.31907	0.14413	0	0.750468	0.144403	0.871614	0	0.270931	0.447862	0	0	0.143759
Bcin10g05840	578	yes	no	MFS drug efflux transporter	Bfab10g05840	381	292	443	593	0.65917	N-Terminus	Frameshift	180		1	4.29298	0.252959	0.104182	1.08906	1.71209	1.49025	0.062616	0	1.74666	0.0838864	0.666603	0.511954
Bcin10g06230	514	yes	no	YbiA-like protein (DUF1768)	Bfab10g06230	452	431	482	482	0.879377					>1	0	0.0387611	0	0	0.0319264	0.0141375	0	0	0	0	0	0
Bcin11g00040	413	no	yes	FAD/FMN-containing dehydrogenase	Bfab11g00040	347	456	456	456	0.840194					>1	0	0	0	0	0.0647064	0.0129413	0.981463	0.752816	1.55555	2.11175	1.9525	1.47082
Bcin11g00090	293	yes	no	Dienelactone hydrolase	Bfab11g00090	199	179	179	179	0.679181					>1	8.37473	6.9857	1.84658	2.39154	20.7971	8.07913	1.10732	5.75586	1.44789	4.94488	3.76572	3.40433
Bcin11g00180	1529	n.a.	no	Hypothetical	Bfab11g00180	1363	n.d.	1383	1383	0.891432					>1	0.364039	0.195187	0.132672	0.262301	0.78701	0.348242	0.0996636	0.120129	0.173756	0.155772	0.486295	0.207123
Bcin11g00920.2	434	n.a.	no	Hypothetical	Bfab11g00920	339	n.d.	424	424	0.781106	N-terminus	Deletion			1	0	0.612296	0.0693352	0.0412863	0	0.144583	0	0.124309	0.20549	0.276332	0	0.121226
Bcin11g01710	612	no	no	AAA domain protein	Bfab11g01710	511	823	n.d.	n.d.	0.834967					>1	0.0633876	0.124861	0	0	0.130726	0.0637949	0.131166	0.513823	0.0653365	0.205009	0.42667	0.268401
Bcin11g01730	125	n.a.	no	Hypothetical	Bfab11g01730	75	855	544	544	0.6	Premature stop	Frameshift	67		1	3.5009	16.3226	0.957487	0.855217	1.25548	4.57834	0	9.176	0.459648	0	0.272878	1.98171
Bcin11g02260	1181	no	no	Ankyrin repeats protein/ NACHT domain/AAA ATPase	Bfab11g02260	407	447	1144	1144	0.344623					>1	1.952	5.55305	0.459302	0.614112	12.7724	4.25017	0.472786	2.04203	0.117753	0.351883	2.74963	1.14682
Bcin11g02270	799	yes	no	Indoleamine 2,3-dioxygenase	Bfab11g02270	533	635	n.d.	n.d.	0.667084	Premature stop	Frameshift	523		1	0.234989	0.615683	0	0.111364	0.220957	0.236599	0.380681	1.95011	1.517	18.2182	0.675448	4.54829
Bcin11g02450	1154	yes	no	Ankyrin repeats protein	Bfab11g02450	482	458	1075	1075	0.417678					>1	4.6547	0	0.443926	1.13854	0	1.24743	1.48861	0.398728	0.411949	1.47724	3.13038	1.38138
Bcin11g02510	395	n.a.	no	Hypothetical	Bfab11g02510	337	337	337	337	0.853165					>1	0.743115	0.831891	0.60931	1.57162	1.27134	1.00546	1.4524	0.562703	0.878499	1.38983	1.53393	1.16347
Bcin11g03480	335	yes	no	Aminotransferase class I and II	Bfab11g03480	237	235	249	249	0.707463					>1	0.346934	0.0495652	0	0.160353	0.0489983	0.12117	0	0	0	0.104624	0	0.0209249
Bcin11g03840	651	yes	no	FAD/FMN-containing dehydrogenase	Bfab11g03840	399	569	569	569	0.612903					>1	2.44775	10.3788	12.9988	26.2411	15.2158	13.4564	2.89286	1.0038	8.99531	2.5837	13.5839	5.81191
Bcin11g04380	390	yes	no	Hypothetical (DUF3425)	Bfab11g04380	279	390	n.d.	n.d.	0.715385	N-Terminus	Frameshift	231		1	3.22815	310.466	8.09945	11.5349	6.36675	67.939	2.89711	360.106	37.3471	11.1811	3.64706	83.0357
Bcin11g04980	748	yes	no	HET protein	Bfab11g04980	186	732	732	732	0.248663					>1	2.65328	0.875233	0.523486	1.42566	5.56123	2.20778	0	0.79106	0.653831	0.0837369	0.332707	0.372267
Bcin11g05300	555	n.a.	no	Hypothetical	Bfab11g05300	232	555	555	555	0.418018					>1	0	0.185668	0.108492	0.0323014	1.6864	0.402572	0	1.81396	0.149928	0.13441	0.35603	0.490865
Bcin11g05360	250	yes	yes	Glycosyl hydrolase family 61 (ß -glucanase)	Bfab11g05360	85	250	252	252	0.34					>1	9.62074	0.238589	0.120163	0	0.122203	2.02034	0	0.605712	0	0.448819	1.98141	0.607188
Bcin11g05410	395	n.a.	no	Hypothetical	Bfab11g05410	205	373	373	373	0.518987					>1	0	0.277393	0	0	809.414	161.938	0.680873	0.205171	0.339158	0.0760136	1.20808	0.50186
Bcin11g05860	205	no	no	Cytochrome P450	Bfab11g05860	54	556	556	556	0.263415					>1	0	0.461457	0.616926	0.0408172	6.69515	1.56287	0	0.377368	0	0.279621	0.370335	0.205465
Bcin11g06310.2	301	yes	no	NmrA-like family	Bfab11g06310	186	186	186	186	0.61794					>1	1.13715	1.28987	0.0998703	0	0.393344	0.584047	0.168043	0	0	0.150084	0	0.0636255
Bcin12g00160	229	yes	no	Short chain dehydrogenase	Bfab12g00160	104	229	201	264	0.454148	Premature stop	Frameshift	96		1	7.24196	4.99271	0.786804	4.4232	29.03	9.29493	2.13811	3.22143	0.958534	3.15086	12.772	4.44819
Bcin12g00570	127	n.a.	no	Hypothetical	Bfab12g00570	63	604	1086	1086	0.496063					>1	0.350059	0.150035	0	0.161798	0.0695982	0.146298	0	0	0	0	1.43026	0.286052
Bcin12g00620	548	no	no	AMP-binding enzyme	Bfab12g00620	128	1073	1073	989	0.233577					>1	0.677571	0.206112	0.164813	0.348512	0.0710729	0.293616	0	0.819093	0.2708	0.364158	0.160766	0.322963
Bcin12g00880	322	n.a.	no	Hypothetical (DUF2422)	Bfab12g00880	226	805	729	729	0.701863					>1	0.803138	0.298767	0.0933772	0.793321	0.705938	0.538908	0.443776	0.560735	0.71217	0.612569	0.981286	0.662107
Bcin12g00920.2	303	yes	no	Hypothetical (IBR domain)	Bfab12g00920	195	212	319	316	0.643564					>1	0.375596	0.933155	0	0.185029	0.408593	0.380475	0.164624	0.496071	0.574021	0.514608	0	0.349865
Bcin12g01420	595	yes	no	Fungal Zn(2)-Cys(6) binuclear cluster domain	Bfab12g01420	348	348	520	520	0.584874	Premature stop	Deletion	349		1	5.38986	0.965943	1.61937	4.26236	11.2825	4.704	4.52762	3.77368	4.65457	9.42109	11.167	6.7088
Bcin12g02570	435	yes	no	Bacterial transferase hexapeptide	Bfab12g02570	189	125	125	125	0.434483					>1	0	0.129766	0	0	0	0.0259531	0	0	0.075832	0	0	0.0151664
Bcin12g02690	707	yes	no	Transcription termination factor rho	Bfab12g02690	326	326	326	326	0.461103					>1	0.661319	84.5222	0.284792	0.354044	2.42348	17.6492	0.107232	1.80952	10.7898	0.335204	0.697634	2.74787
Bcin12g03230	753	no	no	HET/ ankyrin repeat protein	Bfab12g03230	438	438	438	612	0.581673					>1	3.59555	0	0.160004	2.23787	0	1.19269	0	0	0	0.0356692	0.283445	0.0638229
Bcin12g03310	275	n.a.	no	Hypothetical	Bfab12g03310	211	211	211	211	0.767273					>1	13.3222	2.34005	2.07629	2.46501	10.2495	6.09062	4.79662	2.19301	9.88677	16.9145	14.3802	9.63421
Bcin12g03350	1094	n.a.	no	Hypothetical	Bfab12g03350	423	432	1053	1053	0.386654					>1	6.6428	50.5829	4.02144	21.6648	10.1055	18.6035	1.78302	12.5659	3.40434	6.57226	3.77211	5.61953
Bcin12g03360	350	n.a.	no	Hypothetical	Bfab12g03360	199	333	333	333	0.568571	Premature stop	Frameshift	164		1	1.26281	2.82572	0.2677	0.0878612	0.5919	1.0072	0.7013	0.950967	0.698665	2.34882	1.97018	1.33399
Bcin12g03690	457	yes	no	Lactonase, 7-bladed beta-propeller	Bfab12g03690	411	411	282	278	0.899344	N-terminus	Frameshift	36		1	104.938	4.22495	4.31915	53.097	26.1528	38.5465	126.641	15.1527	97.4169	20.079	19.2804	55.7141
Bcin12g03780	110	n.a.	no	Hypothetical	Bfab12g03780	54	244	n.d.	n.d.	0.490909	Premature stop	Point mut.	55	TGG to TGA	1	0.386064	0.179837	0.271719	0	0.148127	0.197149	1.27509	1.53692	2.22303	0.569411	0.754137	1.27172
Bcin12g03820	268	n.a.	no	Hypothetical	Bfab12g03820	114	268	268	268	0.425373	Premature stop	Point mut.	115	CAA to TAA	1	0.448202	0.494861	0	0.397958	0.323501	0.332904	2.13439	3.30771	1.67072	0.816981	3.60674	2.30731
Bcin12g04250	252	yes	no	Haloacid dehalogenase-like hydrolase	Bfab12g04250	135	135	151	266	0.535714	Premature stop	Frameshift	97		1	1.12247	0.43418	0	0	1.80673	0.672677	0	0	0	0.345415	0.914945	0.252072
Bcin12g04460	600	yes	no	Hexokinase	Bfab12g04460	535	535	535	535	0.891667					>1	5.68625	6.2914	7.25886	10.2135	1.15479	6.12096	6.44803	13.2125	10.1557	12.9439	2.50608	9.05324
Bcin12g04570	526	yes	no	Phosphomevalonate kinase (Bcerg8)	Bfab12g04570	443	443	443	443	0.842205					>1	74.8224	119.399	55.7024	182.502	89.7175	104.429	64.1195	87.2509	92.9483	58.5367	60.8445	72.74
Bcin12g04880	447	yes	no	FAD/FMN-containing dehydrogenase	Bfab12g04880	269	276	463	463	0.60179					>1	4.56481	5.59316	0.740556	2.50537	29.8842	8.65762	16.1762	7.1173	12.2102	9.9714	47.9535	18.6857
Bcin12g04910	324	yes	no	Alpha/beta hydrolase	Bfab12g04910	259	259	259	259	0.799383					>1	6.56365	6.40323	0.324698	20.1648	14.7136	9.63399	0.134865	0.325117	0.0671793	0.120452	1.356	0.400722
Bcin12g05160	128	no	no	GMC oxidoreductase	Bfab12g05160	68	625	716	716	0.53125	Premature stop	Frameshift	55		1	1.04224	0.289505	0.904825	0.339818	0.164211	0.54812	0.508188	0	0.25314	0.680817	0	0.288429
Bcin12g05280	526	yes	no	MFS_multidrug_transporter	Bfab12g05280	435	531	586	586	0.826996					>1	10.305	8.10122	0.572312	2.09036	6.78881	5.57154	0.160849	4.50764	0.76116	0.502805	0.380528	1.2626
Bcin12g05540	1249	yes	no	Rad4 DNA repair protein	Bfab12g05540	1115	1123	1123	1123	0.892714					>1	6.0641	6.95797	10.134	7.37966	7.10816	7.52879	3.20486	15.679	9.9541	23.0953	7.11733	11.8101
Bcin12g05640	382	yes	no	Alcohol dehydrogenase GroES-like domain	Bfab12g05640	187	219	219	219	0.489529					>1	10.2841	0.512562	0.157498	11.0665	0.405962	4.48531	0	0	0	0	0	0
Bcin12g05910	380	n.a.	no	Hypothetical	Bfab12g05910	148	127	212	212	0.389474					>1	0	0.428129	0	0	1.80235	0.446096	0.203079	0.244779	0.202316	0.272064	0.960869	0.376621
Bcin12g06070	308	yes	no	Hypothetical (DUF924)	Bfab12g06070	255	245	245	245	0.827922	Internal	Deletion	72		1	0.369822	0.118498	0.195216	0.963357	0.100534	0.349485	0.033901	0	0.0337737	0	0	0.0135349
Bcin12g06150.2	343	n.a.	no	Hypothetical	Bfab12g06150	102	495	363	363	0.297376					>1	0	0	0	0	1.75048	0.350096	0	0.820684	0.678316	0.608109	0.805389	0.582499
Bcin12g06160	907	n.a.	no	Hypothetical	Bfab12g06160	511	873	801	801	0.563396	N-Terminus	Point mut.	247	CAA to TAA	1	1.08361	15.7683	3.81993	0.788057	0.765775	4.44513	1.03972	32.6941	57.0306	30.6712	1.049	24.4969
Bcin12g06210	612	yes	no	Fungal Zn(2)-Cys(6) binuclear cluster domain	Bfab12g06210	154	611	611	611	0.251634	Premature stop	Point mut.	155	TGG to TGA	1	4.82288	2.55714	0.787232	2.26032	24.298	6.94511	2.43743	2.05187	0.97002	4.39457	49.1108	11.7929
Bcin12g06250	416	n.a.	no	Hypothetical	Bfab12g06250	368	416	416	416	0.884615	Premature stop	Frameshift	149		1	0	9.62164	0	0	0.0735565	1.93904	0.0840215	1.06338	0	0.33769	0	0.297019
Bcin12g06260	242	n.a.	no	Hypothetical	Bfab12g06260	92	92	1426	1426	0.380165					>1	3.05918	111.045	0.124119	0.906682	14.0154	25.8301	0	0.681697	0.187813	0.505122	0	0.274927
Bcin13g00310	729	n.a.	no	Hypothetical	Bfab13g00310	209	209	209	209	0.286694					>1	0.657494	0.542527	0.33053	0.415333	5.13132	1.41544	0.166976	0.905683	0	0.0745657	0	0.229445
Bcin13g00340	688	yes	no	HET protein	Bfab13g00340	335	404	404	404	0.486919					>1	1.17924	2.19749	2.98241	2.33322	1.96578	2.13163	0.41744	0.628947	0.155952	0.0932071	0	0.259109
Bcin13g00370	756	yes	no	Tetratricopeptide repeat protein	Bfab13g00370	666	449	449	449	0.880952	Premature stop	Deletion	666		1	1.01975	0.400217	0.199213	0.322059	3.85204	1.15865	0.0480123	0.983809	0.382655	0.621778	2.64085	0.935422
Bcin13g00650	176	yes	no	Hemerythrin-like domain	Bfab13g00650	88	304	203	203	0.5					>1	0.681165	0.206869	0	0.269247	0.815605	0.394577	0	0	0	0.141923	0	0.0283845
Bcin13g01080	330	n.a.	no	Hypothetical (DUF946)	Bfab13g01080	124	320	320	320	0.375758					>1	0.388397	0.160936	0.0911203	0.0897193	0.534034	0.252841	3.08572	0	0	2.75595	0.99546	1.36743
Bcin13g01100	469	n.a.	no	Hypothetical	Bfab13g01100	155	375	461	461	0.33049	Premature stop	Frameshift	132		1	0	0.0354338	0	0.101397	0.759805	0.179327	0.279774	0.252917	0.418084	1.06197	0.330938	0.468736
Bcin13g01150	397	n.a.	yes	Hypothetical	Bfab13g01150	72	216	216	216	0.18136					>1	5.5588	1.65139	0.481006	2.98123	4.77414	3.08932	1.44103	0.289488	0.239269	1.07252	0.852278	0.778916
Bcin13g01480	256	yes	no	Short chain dehydrogenase	Bfab13g01480	163	256	256	256	0.636719					>1	1.08945	0.0776729	0.117357	0.41654	1.63196	0.666596	0.339339	0.306764	1.57298	1.1071	4.25947	1.51713
Bcin13g01950	466	n.a.	no	Hypothetical	Bfab13g01950	246	445	424	424	0.527897	Premature stop	Frameshift	151		1	4.91152	1.26263	1.8134	2.15083	0.757791	2.17923	3.66807	0.789512	2.74072	6.25962	0.929757	2.87753
Bcin13g02060	276	no	no	Phosphotransferase	Bfab13g02060	177	158	580	580	0.641304					>1	3.47209	3.03047	0.900323	2.02439	18.8251	5.65047	0.53489	1.50436	1.24339	5.09574	5.37802	2.75128
Bcin13g02160	1125	yes	no	Ankyrin repeats/ NACHT domain protein	Bfab13g02160	155	980	1037	1037	0.137778					>1	3.25023	0.957625	0.616074	5.30995	3.37764	2.7023	0.443861	1.00313	0.718564	1.43704	1.44384	1.00929
Bcin13g02270	362	n.a.	no	Hypothetical	Bfab13g02270	274	274	274	274	0.756906	Premature stop	Point mut.	275	CAA to TAA	1	1.37017	0.551246	0.079301	0.266964	3.47734	1.149	2.05306	1.00164	1.50966	0.698534	0.982971	1.24917
Bcin13g03040	988	n.a.	no	Hypothetical	Bfab13g03040	551	988	988	988	0.557692					>1	1.39411	0.511519	0.853896	0.64673	3.36383	1.35402	0.317618	0.842242	0.537921	1.16306	1.57795	0.887758
Bcin13g03180	732	yes	no	HET protein	Bfab13g03180	276	732	732	732	0.377049	Premature stop	Point mut.	277	CAA to TAA	1	0.888653	0.25428	0.123441	0.146045	3.29611	0.941707	0.119812	1.15531	0.358086	1.4446	2.48015	1.11159
Bcin13g03710	976	yes	no	Tetratricopeptide repeat protein	Bfab13g03710	281	281	794	794	0.28791					>1	2.34287	0.913244	0.648288	0.842695	4.86411	1.92224	0.889598	1.34033	0.941647	2.43324	0.920748	1.30511
Bcin13g04090	858	yes	no	Fungal C2H2 transcription factor	Bfab13g04090	580	927	921	921	0.675991	N-Terminus	Frameshift	282		1	1.94302	1.82482	0.772454	1.18679	2.53741	1.6529	24.0941	9.61723	20.2383	11.0643	14.4675	15.8963
Bcin13g05010	536	no	no	Ankyrin repeats protein	Bfab13g05010	249	484	484	484	0.464552					>1	2.47091	6.38704	1.63031	0.644009	10.5726	4.34098	3.56186	11.0905	5.32366	3.91083	4.55408	5.6882
Bcin13g05030	125	no	no	Methyltransferase (trunc.)	Bfab13g05030	74	198	336	336	0.592	Premature stop	Frameshift	65		1	1.24012	0.986056	0.446827	0.133034	0.638238	0.688854	0	0.563536	0.465777	1.04392	0.553033	0.525253
Bcin13g05130	696	yes	no	Amino acid permease	Bfab13g05130	242	656	656	656	0.347701	Premature stop	Frameshift	239		1	0.158219	2.08187	0.0432723	0.523252	5.08891	1.5791	0	0.347862	0.575033	0.0644395	1.10948	0.419363
Bcin13g05290	1484	yes	no	Ankyrin repeats protein	Bfab13g05290	243	1354	1454	1490	0.163747					>1	10.5665	4.43629	2.07165	3.45756	14.7627	7.05894	0.0975834	0.352864	0.631909	0.130732	0.230858	0.288789
Bcin13g05380	439	no	no	NADH:flavin oxidoreductase / NADH oxidase family	Bfab13g05380	368	440	392	373	0.838269	N-Terminus	Point mut.	40	CAA to TAA	1	1.29993	1.33149	0.754021	0.230762	48.0323	10.3297	0.760216	2.51988	1.8934	1.61256	1061.34	213.626
Bcin13g05650	185	n.a.	no	Hypothetical	Bfab13g05650	126	126	515	515	0.681081	Premature stop	Frameshift	108		1	0	0.0842524	0	0	0.0415904	0.0251686	0	0	0	0	0	0
Bcin13g05790	466	n.a.	no	Hypothetical	Bfab13g05790	196	477	401	401	0.420601	Premature stop	Frameshift	164		1	0.0365018	3.82356	1.04047	0.25151	0.078089	1.04603	0	0.396236	0	0.0734006	0.0972129	0.11337
Bcin14g00080	215	n.a.	no	Hypothetical	Bfab14g00080	158	644	192	192	0.734884					>1	11.3112	0.246619	0	0.137486	0.468006	2.43266	6.17497	0	0	1.1818	7.69551	3.01045
Bcin14g00450	423	n.a.	no	Hypothetical	Bfab14g00450	321	422	422	422	0.758865	Premature stop	Deletion	321		1	0.871915	3.00693	1.70722	0.900848	4.90262	2.27791	0.108897	0.459405	0.705174	1.16712	0.966091	0.681337
Bcin14g00560	277	yes	no	Enoyl-(Acyl carrier protein) reductase	Bfab14g00560	139	273	270	270	0.501805					>1	0.154148	3.89063	0.216984	0	226.046	46.0616	0	0	0	0	29.8217	5.96434
Bcin14g00600	2592	yes	no	Polyketide synthase	Bfab14g00600	1455	1745	1368	1745	0.561343					>1	0	5.4579	0.0232633	0.0527373	153.252	31.7572	0	0.0131422	0	0.00973806	7.09348	1.42327
Bcin14g00690	287	yes	no	Short chain dehydrogenase	Bfab14g00690	91	250	241	241	0.317073	Premature stop	Point mut.	92	CAA to TAA	1	0.234116	8.30836	3.24648	4.27875	0.70619	3.35478	0	1.11504	0.526632	0.354093	0	0.399152
Bcin14g00750.2	903	n.a.	no	Hypothetical	Bfab14g00750	443	523	638	638	0.490587					>1	0.551211	1.33526	0	0.310933	10.6221	2.56391	1.71716	5.80434	0.929735	3.26734	42.1693	10.7776
Bcin14g00930	497	n.a.	yes	Hypothetical	Bfab14g00930	240	240	517	517	0.482897	Premature stop	Point mut.	241	TGG to TGA	1	0.0860504	0	0.0605639	0.251025	0.896202	0.258768	0	0.350749	0.507329	0.519794	0.516318	0.378838
Bcin14g01070	372	yes	no	D-arabinose dehydrogenase	Bfab14g01070	326	392	392	392	0.876344					>1	1038.8	20.6907	2.26408	11.4876	15.9188	217.833	0.915623	1.96202	35.8792	3.7254	9.80779	10.458
Bcin14g01140	564	n.a.	no	Hypothetical	Bfab14g01140	219	219	324	324	0.388298	Premature stop	Point mut.	220	CAG to TAG	1	0	0.0884278	0	0	0.0990574	0.037497	0	0.288172	0	0.355882	0.188534	0.166518
Bcin14g01330	567	yes	no	Major Facilitator Superfamily	Bfab14g01330	391	391	504	504	0.689594					>1	0.967765	0.205042	0.2655	0.841513	2.77556	1.01108	0.244968	0.458409	0.412086	0.248552	2.51523	0.77585
Bcin14g01350	143	yes	no	Polyketide cyclase / dehydrase and lipid transport	Bfab14g01350	90	710	1061	1061	0.629371					>1	0.539675	4.94612	0.4189	0.455668	5.03066	2.27821	0	1.48299	0	0	0	0.296598
Bcin14g01570.2	455	n.a.	no	Hypothetical (DUF4246)	Bfab14g01570	318	558	546	546	0.698901					>1	0.0313942	0.212092	0	0.0652683	0.267668	0.115285	0.439686	0.264986	0.109509	0.0490871	0.195035	0.211661
Bcin14g01780	170	n.a.	no	Hypothetical	Bfab14g01780	99	131	805	805	0.582353					>1	2.64482	2.54666	0.685473	1.40236	2.41781	1.93942	0.348905	0.315412	0.434493	2.18132	0.722245	0.800476
Bcin14g02500	712	yes	no	HET protein	Bfab14g02500	214	502	625	502	0.300562	Premature stop	Frameshift	197		1	3.88041	2.09594	0.549917	4.31245	1.62308	2.49236	1.46784	4.91456	1.38108	1.45663	3.76191	2.5964
Bcin14g03440	546	yes	yes	Carboxylesterase family	Bfab14g03440	298	472	380	380	0.545788					>1	0.142072	0.0364935	0	0.108582	0.615667	0.180563	0	0	0.111017	0	0	0.0222033
Bcin14g04420.2	388	yes	no	Hypothetical (DUF4419)	Bfab14g04420	232	232	232	232	0.597938	Premature stop	Point mut.	233	TCA to TAA	1	20.009	73.2725	1.00795	9.20066	7.63067	22.2242	0	0.150947	0.0623808	0.167773	1.03694	0.283608
Bcin14g05450	194	yes	no	Stress responsive A/B barrel domain	Bfab14g05450	111	530	1489	1489	0.572165					>1	22.2278	7.59135	3.00069	36.6596	8.63405	15.6227	33.807	14.7833	35.6382	49.5745	25.3887	31.8384
Bcin15g00930	423	yes	no	Alpha/beta hydrolase	Bfab15g00930	182	423	423	423	0.43026	Premature stop	Frameshift	149		1	0.0916429	0	0	0	2.55135	0.528599	0	0	0.0678755	0.243401	11.6051	2.38328
Bcin15g01390	777	n.a.	no	Hypothetical	Bfab15g01390	418	658	732	732	0.537967	Premature stop	Frameshift	414		1	0.160106	2.93498	0.387671	1.67516	6.10595	2.25277	0.167375	1.00872	0.375178	0.485834	1.1384	0.635101
Bcin15g01540	333	yes	no	BTB/POZ domain protein	Bfab15g01540	280	514	280	280	0.840841					>1	0.520081	4.99338	0.541811	0.215085	0.524709	1.35901	0.21018	0.950017	0.523475	0.610083	0.559387	0.570628
Bcin15g02520	792	yes	no	Fungal specific transcription factor domain	Bfab15g02520	416	667	663	663	0.525253					>1	15.4141	4.37314	5.85721	9.96676	61.327	19.3876	5.04963	5.58973	4.48662	19.5049	23.6959	11.6653
Bcin15g02540	568	yes	yes	FAD/FMN-containing dehydrogenase	Bfab15g02540	280	439	439	439	0.492958					>1	0.850557	0.602416	0.15902	1.74668	40.22	8.71573	0.499146	3.15861	2.36203	56.0039	63.8399	25.1727
Bcin15g02670	124	n.a.	no	Hypothetical	Bfab15g02670	63	716	134	134	0.508065	Premature stop	Point mut.	64	TGG to TGA	1	6.46868	1.95939	0.341443	2.00435	1.80008	2.51479	0	0	0.545832	0.244669	0	0.1581
Bcin15g02750	658	yes	no	Ankyrin repeats protein	Bfab15g02750	594	658	659	659	0.902736	Loss of start codon	Point mut.	1	ATG to ATA	1	4.98646	1.18153	0	1.10879	21.9224	5.83984	4.83531	12.4335	4.25515	11.0123	15.8242	9.67209
Bcin15g02790	150	n.a.	no	Hypothetical	Bfab15g02790	83	n.d.	844	844	0.553333					>1	51.7244	4.58538	9.38781	10.7587	18.5546	19.0022	1.67508	0.403808	1.33503	1.19685	0.594423	1.04104
Bcin15g02850	260	n.a.	no	BTB/POZ domain protein	Bfab15g02850	194	599	599	599	0.746154	N-Terminus	Deletion			1	0	0.765261	0	0.182592	0	0.189571	0	0.650234	0.179145	0.160603	0	0.197996
Bcin15g03060	399	yes	no	Hypothetical (DUF946)	Bfab15g03060	349	349	344	344	0.874687					>1	242.373	1.02319	0.226206	0.611263	86.6539	66.1775	2.25934	1.36164	1.21546	141.212	3.47428	29.9045
Bcin15g03940	744	yes	no	HET protein	Bfab15g03940	211	211	172	431	0.283602	Premature stop	Point mut.	212	CAA to TAA	1	0	0	0	0	1.20328	0.240656	0	0	0	0	0.293473	0.0586946
Bcin15g03990	231	yes	no	Hypothetical (DUF3328)	Bfab15g03990	150	150	226	226	0.649351	N-Terminus	Deletion			1	148.671	0	0	0.205417	1919.5	413.676	0	0	0	0	0	0
Bcin15g04510	725	yes	no	Hypothetical (DUF5401, IBR domain)	Bfab15g04510	550	725	725	725	0.758621	Premature stop	Point mut.	551	CGA to TGA	1	2.07984	2.98213	0.890826	2.6101	4.75337	2.66325	2.16234	8.48826	2.70733	3.62762	3.69841	4.13679
Bcin15g04640	1044	n.a.	no	Hypothetical	Bfab15g04640	564	1045	996	996	0.54023					>1	1.13731	0.140156	0	0.511529	6.1948	1.59676	0.558557	0.635848	0.432801	1.27488	5.57928	1.69627
Bcin15g04650	247	n.a.	no	Hypothetical	Bfab15g04650	168	168	168	168	0.680162	Premature stop	Point mut.	169	TTA to TAA	1	0.115197	5.43571	0	0.192164	0.533497	1.25531	0.82994	0.50018	0.620117	0.926556	1.10443	0.796245
Bcin15g04660	129	yes	no	Hypothetical membrane protein (DUF4267)	Bfab15g04660	73	170	206	206	0.565891	Premature stop	Frameshift	22		1	4.88767	2.07428	2.32006	10.2591	22.682	8.44463	14.6894	7.71055	25.0198	30.6828	121.91	40.0025
Bcin15g04890	192	no	no	Tannase and feruloyl esterase	Bfab15g04890	107	195	540	540	0.557292					>1	0.0362241	0.472664	0	0	0.0193013	0.105638	0	0.587017	0.161728	0.434967	0.384051	0.313552
Bcin15g05150	513	yes	no	3-octaprenyl-4-hydroxybenzoate carboxy-lyase	Bfab15g05150	263	263	496	496	0.512671	Premature stop	Deletion	216		1	0.0277906	0.23324	0	0.150494	0.391101	0.160525	0	0.240143	0.396969	0.0593136	0.785559	0.296397
Bcin15g05280	167	n.a.	yes	Hypothetical	Bfab15g05280	88	78	88	88	0.526946	Premature stop	Deletion	77		1	4.07112	2.00162	1.97482	1.883	21.3365	6.25342	1.57595	2.37445	2.1588	8.79708	7.92267	4.56579
Bcin16g00020	285	n.a.	no	Hypothetical membrane protein	Bfab16g00020	143	364	130	130	0.501754					>1	0.584478	0.510305	0.0690179	0.354022	0.0348336	0.310531	0.487014	2.34807	1.57685	0.869933	0.432057	1.14278
Bcin16g00030	424	yes	no	C4-dicarboxylate transporter/malic acid transport protein family (Mae1)	Bfab16g00030	301	306	306	306	0.709906	Premature stop	Point mut.	302	TCA to TGA	1	5.12775	1.49604	3.69027	6.45482	2.20201	3.79418	3.59939	2.02929	2.25562	2.28141	8.37791	3.70872
Bcin16g00240	333	yes	no	Short chain dehydrogenase	Bfab16g00240	166	166	166	166	0.498498					>1	0	155.671	0.270906	0	0.0227878	31.1929	0	0	0	0	0	0
Bcin16g00360	464	no	no	HET protein	Bfab16g00360	120	374	168	168	0.258621					>1	0.747128	0.630194	0.194586	0.524298	0.318005	0.482842	0	2.79439	0.866114	0.776469	0.342789	0.955953
Bcin16g00860	226	n.a.	no	Hypothetical	Bfab16g00860	162	1247	1247	1247	0.716814	Loss of start codon	Point mut.	1	ATG to CTG	1	0.702303	3.68083	6.37762	0.158234	0.342773	2.25235	0	2.79696	0.385293	0.518122	0.228736	0.785823
Bcin16g01460	397	yes	yes	Tyrosinase	Bfab16g01460	230	303	303	303	0.579345	Premature stop	Deletion	217		1	1.09401	0.459998	0.151562	0.508452	24.4967	5.34214	1.18324	1.2867	1.86201	3.15465	39.4721	9.39174
Bcin16g01570	507	yes	no	D-galactonate MFS transporter	Bfab16g01570	182	303	397	397	0.358974					>1	4.70168	3.46583	3.50293	5.44668	18.7537	7.17416	2.19483	2.74	1.79612	8.40114	3.52342	3.7311
Bcin16g01820	255	n.a.	yes	Hypothetical	Bfab16g01820	202	151	151	151	0.792157	Premature stop	Deletion	201		1	6.0936	0.923238	0.471263	5.06991	3.4474	3.20108	0.472432	0.0949069	1.0982	0.703239	11.3629	2.74633
Bcin16g01890	777	yes	no	Fungal specific transcription factor (GAL4-like Zn2Cys6 )	Bfab16g01890	321	777	777	777	0.413127					>1	0.0367207	16.0632	0	0.160682	0.135233	3.27917	0	2.05456	0.873331	0	0	0.585578
Bcin16g01940	442	yes	no	Tryptophan dimethylallyltransferase	Bfab16g01940	117	428	437	437	0.264706					>1	0.383094	0.278089	0	1.66217	0.0174388	0.468159	0	0.17909	0.296045	0	0	0.0950269
Bcin16g02350	480	n.a.	no	Hypothetical	Bfab16g02350	417	417	349	348	0.86875	Internal	Deletion	277		1	0.299873	5.08333	0.0623158	0.492321	3.58166	1.9039	1.00186	1.67203	1.91941	6.05703	1.73203	2.47647
Bcin16g02840	391	n.a.	no	Hypothetical	Bfab16g02840	342	339	338	338	0.87468					>1	11.2618	0.475478	0	0.928572	0.338976	2.60096	7.63937	8.57299	7.34823	12.3911	5.81655	8.35365
Bcin16g02850	647	yes	yes	FAD binding domain	Bfab16g02850	219	183	657	657	0.338485					>1	44.8015	0.133607	0.186178	6.61852	0.0598619	10.3599	4.30343	4.99498	2.77878	7.61587	3.20508	4.57963
Bcin16g02950	300	yes	no	Hypothetical (DUF3328)	Bfab16g02950	186	156	154	154	0.62	Premature stop	Frameshift	175		1	2.9466	0.122843	0	0	0	0.613889	0	0	0	0	0	0
Bcin16g02970	1459	yes	no	ABC transporter	Bfab16g02970	664	651	786	764	0.455106					>1	1.03871	0.116256	0.165265	0.500956	0.952225	0.554682	0.143644	0.0865696	0.0715519	0.192439	0.339825	0.166806
Bcin16g03010	2035	yes	no	AAA domain- DEAD-box helicase domain	Bfab16g03010	526	605	1348	1348	0.258477					>1	2.47302	2.12679	0.681433	0.307	2.65549	1.64875	0.700521	1.61837	0.668811	8.62885	1.34652	2.59261
Bcin16g03230	796	yes	no	Fungal Zn(2)-Cys(6) binuclear cluster domain	Bfab16g03230	546	647	738	738	0.68593	N-Terminus	Deletion	58		1	6.30331	0.325745	1.24882	3.71244	0.0096931	2.32	1.26814	1.1646	2.22594	5.28552	1.71434	2.33171
Bcin16g03840	443	no	no	Cytochrome P450	Bfab16g03840	369	204	369	369	0.832957					>1	0.262544	0.0899187	0	0	0.160361	0.102565	0	0.149877	0	0	0	0.0299753
Bcin16g04470	373	n.a.	no	Hypothetical	Bfab16g04470	257	257	249	249	0.689008	Premature stop	Deletion	220		1	0.835707	0.142432	0	0.127424	3.18339	0.85779	0.880819	1.06169	1.06555	1.91052	1.0419	1.19209
Bcin16g04880	498	n.a.	no	Hypothetical	Bfab16g04880	290	236	962	962	0.582329					>1	0.28626	0.19339	0	0.119026	0.43803	0.207341	0.0780378	0.0940621	0.0388723	0.104547	0.0461545	0.0723347
Bcin16g04890	444	n.a.	no	Hypothetical	Bfab16g04890	219	263	261	261	0.493243					>1	0.905781	0.646572	0.718554	0.634161	4.61025	1.50306	0	0.0835281	0.069038	0.371355	0.0819714	0.121178
Bcin16g04900	528	n.a.	no	Hypothetical	Bfab16g04900	353	527	527	527	0.668561	N-Terminus	Deletion	175		1	0.154461	0.54123	0.285074	0.16975	0.0155609	0.233215	0.429718	2.58978	1.88366	1.53518	0.101661	1.308
Bcin16g05000	567	yes	no	Serine/threonine protein kinase	Bfab16g05000	409	545	545	545	0.72134	Premature stop	Frameshift	410		1	15.1776	1.4939	4.19852	1.96313	39.2657	12.4198	5.10335	0.198428	0.820029	3.16117	7.15633	3.28786
											Total number of stage-specifically expressed genes					28	22	0	3	86		0	6	3	12	41
aGenes encoding truncated BcB0510 proteins are shown in italics
bGenes with red background are in clusters
cUpregulation (>3-fold higher expression than average of all stages) of B. cinerea genes
dUpregulation (>3-fold higher expression than average of all stages) of B. fabae genes
dBelow threshold expression (RPKM < 2,00)
