# Supplementary material for: Genome Comparisons between Botrytis fabae and the Closely Related Gray Mold Fungus Botrytis cinerea Reveal Possible Explanations for Their Contrasting Host Ranges
Source: J Fungi (Basel). 2024 Mar 14;10(3):216. doi: 10.3390/jof10030216 (PMC10971195; doi:10.3390/jof10030216)
Supplement: Supplementary file 1 [file jof-10-00216-s001.zip › Table S8.xlsx]

## Sheet: Table S8 Bcin-trunc
Table S8: B. fabae G12 proteins, truncated in B. cinerea B05.10
	Size of B. fabae proteins [aa]									Size ratio	Type of mutation leading to truncation					B. fabae G12 gene expression ( RPKM)c,e						B. cinerea B05.10 gene expression (RPKM)d,e
Bfab G12 gene ID	G12	11002	Bf611	Bf612	SignalP	Intact in BfG12	Predicted function	Bcin B0510 gene ID	B05.10 size [aa]	B05.10/G12	Truncat. type	Main mutation	Codon	Point mut.	No. of mutations	Inf. leaf	Conidia	Germl	Mycel	Scler	mean	Inf. tissue	Ascosp	Germl	Mycel	Scl	mean	expressed
Bfab01g00610	1129	1149	1149	1149	no	yes	AAA ATPase family	Bcin01g00610	854	0.756422	Premature stop	Frameshift	826		1	9.14739	6.45004	10.8141	31.6308	34.9313	18.5947	5.63224	10.0549	1.63335	3.69176	71.7955	18.5616	yes
Bfab01g05840	341	341	807	807	no	yes	Alpha/beta hydrolase	Bcin01g05840	172	0.504399					>1	6.2221	3.99986	6.57065	2.07467	26.4959	9.07263	3.71433	2.35986	1.28936	5.32171	5.24937	3.58693	yes
Bfab01g07150	222	222	208	208	no	n.a.	Hypothetical	Bcin01g07150	78	0.351351					>1	0	0.321002	0.397974	0.0594638	0.551283	0.265945	0	0.153553	0	0	3.15858	0.662426	yes
Bfab01g07160	439	473	535	535	no	yes	Transcription factor TFIIB repeat	Bcin01g07160	227	0.517084					>1	0	0.43773	0.0904486	0.405435	0.178988	0.22252	0.226968	1.95445	0	0.337371	2.04813	0.913384	yes
Bfab01g10220	342	332	332	332	no	yes	Protein Kinase B beta	Bcin01g10220	166	0.48538	Premature stop	Point mut.	167	TGG to TGA	1	0.101344	0.122154	0.0504816	0.316796	0.539447	0.226045	0.488399	0.0561254	0.169602	1.69737	0.0645202	0.495202	yes
Bfab01g10760	542	539	539	539	no	yes	Cytochrome P450	Bcin01g10760	105	0.193727					>1	150.604	0.825134	3.43839	8.25399	12.4163	35.1076	3.14749	0.244276	0.288774	0.667955	0.30951	0.931602	yes
Bfab01g11300	437	383	223	235	yes	yes	Ser-Thr-rich glycosyl-phosphatidyl-inositol-anchored membrane family	Bcin01g11300	343	0.784897	Internal	Deletion	204		1	312.623	21.2291	57.1853	244.392	23.2956	131.745	160.424	22.359	328.78	728.824	31.7421	254.426	yes
Bfab01g11410	560	872	872	872	no	yes	Fungal Zn(2)-Cys(6) transcription factor	Bcin01g11410	211	0.376786	Premature stop	Frameshift	195		1	0.0602836	0.472305	0	0.242285	0.463502	0.247675	0.922842	0.34026	0	0.2531	0	0.303241	yes
Bfab02g01500	555	555	555	555	no	yes	MFS antibiotic resistance transporter	Bcin02g01500	308	0.554955	Premature stop	Point mut.	309	GGA to TGA	1	13.7335	4.75733	2.50012	5.33239	10.1904	7.30275	2.08007	1.34707	0.0542461	0.428567	7.96107	2.3742	yes
Bfab02g03130	273	273	718	718	no	no	DNA polymerase III subunits gamma and ta	Bcin02g03130	175	0.641026	Premature stop	Point mut.	176	CGA to TGA	1	0	0.362273	0.0598856	0.268436	0.49773	0.237665	0	0	0	0	0	0	no
Bfab02g03510	198	171	144	144	no	n.a.	Hypothetical	Bcin02g03510	144	0.727273	Premature stop	Frameshift	116		1	36.0714	13.5989	9.89424	44.2799	7.04867	22.1786	143.894	48.2225	2.91208	8.01185	73.4364	55.2953	yes
Bfab02g05330	479	430	381	381	yes	n.a.	Hypothetical	Bcin02g05330	381	0.795407					>1	11.8344	537.164	98.1042	1.76161	2.93799	130.361	4.89566	17.4852	410.961	188.263	0.717824	124.465	yes
Bfab02g05630	280	263	215	239	yes	yes	LysM domain protein, secreted	Bcin02g05630	239	0.853571	Internal	Deletion	70		1	1.5061	1.04732	986.884	53.2365	9.11318	210.357	2.19508	2.28849	36.3187	76.3294	11.5598	25.7383	yes
Bfab03g00370	383	364	364	364	no	n.a.	Hypothetical_membrane_protein	Bcin03g00370	319	0.832898					>1	0.91966	2.38754	0.669534	22.1772	0.836803	5.39814	0.856404	1.96102	0.213234	0.349926	0.819621	0.840041	yes
Bfab03g00810	198	583	445	445	no	no	Ca2+/H+ antiporter	Bcin03g00810	137	0.691919					>1	0	0.284721	0.0784429	0.140648	0	0.100762	0	0.361848	0	0	1.0235	0.27707	yes
Bfab03g02560	316	316	316	316	no	n.a.	Hypothetical	Bcin03g02560	221	0.699367					>1	1.5654	0.141513	1.2866	7.8294	0.601794	2.28494	0.547972	1.13384	0.0951446	0.695027	1.04317	0.703033	yes
Bfab03g05550	288	331	459	459	no	yes	Zinc-binding dehydrogenase	Bcin03g05550	225	0.78125	N-terminus	Frameshift	112		1	0.699481	0	0.621116	0.440201	34.4231	7.23678	1.68133	0.677846	0.53382	0.791544	1.06306	0.949519	yes
Bfab03g06470	2512	2512	2512	2512	no	yes	Polyketide synthase	Bcin03g06470	550	0.218949	N-terminus	Deletion	1972		1	0.125831	0.212337	0.288325	0.578776	9.77897	2.19685	0.51447	0.387874	0.17008	0.615365	12.5687	2.8513	yes
Bfab03g07060	406	417	936	936	no	yes	Hypothetical membrane protein (DUF2985)	Bcin03g07060	189	0.465517					>1	0.777494	4.12344	1.58788	2.32625	0.873695	1.93775	5.8585	1.4458	0.139418	0.801419	1.01299	1.85163	yes
Bfab03g08940	281	387	399	399	no	n.a.	Hypothetical	Bcin03g08940	120	0.427046					>1	10.0719	55.7541	18.4576	22.5442	18.0913	24.9838	2.02586	3.27403	0	1.57543	2.66937	1.90894	yes
Bfab04g01980	950	906	914	914	no	yes	HET protein	Bcin04g01980	634	0.667368					>1	1.10615	0.177772	0.385698	4.18227	5.32098	2.23457	0.646063	0.214843	0.0474974	0.234948	0.699689	0.368608	yes
Bfab04g02830	563	557	563	563	no	n.a.	Hypothetical	Bcin04g02830	493	0.875666					>1	0.180334	0.326046	0.389256	0.375811	0.106656	0.275621	0.136488	0.276165	0	0.169182	0.0479187	0.125951	yes
Bfab04g03560	244	244	226	226	no	no	Alpha/beta hydrolase	Bcin04g03560	115	0.471311	Premature stop	Point mut.	116	TAT to TAA	1	1.13484	4.79789	0.457471	1.03705	0.0795604	1.50136	0	1.004	0	0.154824	0.669603	0.365685	yes
Bfab04g04760	193	165	147	147	no	n.a.	Hypothetical	Bcin04g04760	125	0.647668	Premature stop	Frameshift	116		1	0.361495	0.544655	0.360137	1.45288	0.534504	0.650734	0.145759	0.543569	0	0.606063	5.58534	1.37615	yes
Bfab04g06500	322	288	322	322	no	yes	Short chain dehydrogenase	Bcin04g06500	287	0.891304	Internal	Deletion	230		1	0	2.07182	0.195704	0.219311	0	0.497368	0.60315	13.7052	0.314175	0.661898	0.594675	3.17582	yes
Bfab05g04500	692	643	580	608	no	n.a.	Hypothetical	Bcin05g04500	584	0.843931					>1	0.193195	0.640382	0.842055	1.79019	3.3422	1.3616	0.137327	3.45732	0.0506905	0.0499111	0.857923	0.910634	yes
Bfab05g07250a	672	797	1019	797	no	no	HET protein	Bcin05g07250	570	0.848214	C-terminus	Deletion	547		1	1.68667	2.03301	1.3708	1.52624	6.6154	2.64642	2.01662	0.587785	0	0.211289	4.99544	1.56223	yes
Bfab06g00280	329	329	329	329	yes	n.a.	Hypothetical	Bcin06g00280	200	0.607903					>1	3.73892	3.65405	4.8826	8.48373	3.28712	4.80928	4.27836	12.8522	11.4041	6.4945	15.6484	10.1355	yes
Bfab06g00520	314	103	249	138	yes	n.a.	Hypothetical	Bcin06g00520	249	0.792994	Premature stop	Frameshift	237		1	6.45641	1.6101	4288.31	13.8195	5.59617	863.158	2.91638	1.27847	61.0455	123.942	1.87539	38.2116	yes
Bfab06g05120	483	368	428	428	yes	n.a.	Hypothetical	Bcin06g05120	430	0.890269					>1	0.108841	0.131191	0.108432	0.0486046	43.87	8.85342	0.154928	19.0135	1.37392	0.98591	74.0784	19.1213	yes
Bfab06g06900	464	397	420	397	no	n.a.	Hypothetical	Bcin06g06900	402	0.866379					>1	1.43276	2.04509	2.62938	5.28695	3.03276	2.88539	1.04921	1.04076	0.374204	0.191945	2.75851	1.08293	yes
Bfab06g07030	287	251	477	471	no	n.a.	Hypothetical	Bcin06g07030	155	0.54007					>1	1.24889	0.636873	1.43561	5.1052	1.81819	2.04895	2.59328	0	0	0.686223	0	0.655901	yes
Bfab06g07540	699	648	648	648	no	n.a.	Hypothetical	Bcin06g07540	386	0.552217					>1	0.840032	0.48325	0.551578	0.665001	0.632325	0.634437	0.440974	0.664928	0.437348	0.0578718	1.70439	0.661103	yes
Bfab07g00870	496	428	496	496	no	yes	D-galactonate MFS transporter	Bcin07g00870	285	0.574597	Premature stop	Frameshift	267		1	0.320106	0.506411	0.179383	0.786216	8.40121	2.03866	0.0287412	0.180856	0	0.0361359	4.78865	1.00688	yes
Bfab07g04470	366	366	366	366	no	n.a.	Hypothetical	Bcin07g04470	133	0.363388	Premature stop	Frameshift	130		1	0.173732	0.471165	0.25962	0.27154	21.1669	4.46859	0.58357	0.0649217	0.0534766	0	22.77	4.6944	yes
Bfab07g05230	289	250	289	289	no	n.a.	Hypothetical	Bcin07g05230	169	0.584775					>1	0.0893755	0	0.0445199	0.19956	0.47574	0.161839	0	0.225105	0.0728522	0.0717321	0.977749	0.269488	yes
Bfab08g00840	342	373	342	342	no	no	Acetyl esterase/lipase	Bcin08g00840	102	0.298246	Premature stop	Frameshift	96		1	1.23138	0.530082	11.1284	0.981948	1.40455	3.05527	1.94903	0.676324	0.284984	1.79786	1.31196	1.20403	yes
Bfab08g01890	487	473	580	580	no	n.a.	Hypothetical	Bcin08g01890	394	0.809035					>1	0.359518	0.823348	0.787968	0.256877	47.8423	10.014	0.125119	0.480918	0	0.339807	5.97942	1.38505	yes
Bfab08g02100	208	411	411	411	no	no	Aminotransferase class I and II	Bcin08g02100	153	0.735577					>1	8.49592	0.0930952	1.30807	3.31111	3.74577	3.39079	5.03945	0.312794	1.2355	3.25866	0.336535	2.03659	yes
Bfab08g03600	171	224	316	316	no	no	Multicopper oxidase	Bcin08g03600	96	0.561404					>1	0	0.222839	0	0.0825596	0.32803	0.126686	0.687727	1.03065	0	0.158934	0.851289	0.54572	yes
Bfab08g06060	339	339	339	216	no	n.a.	Hypothetical	Bcin08g06060	252	0.743363	Premature stop	Point mut.	253	TAC to TAA	1	0.0918733	0.110739	0.0915282	0.0820548	0.271687	0.129576	0.210043	0.802534	0.238426	0	2.5487	0.759941	yes
Bfab08g06720	523	523	523	562	no	n.a.	Hypothetical	Bcin08g06720	428	0.818356					>1	0.268354	1.01081	0.167091	0.808905	0.158715	0.482775	0.314337	0.302586	0.070305	0.111088	0.142465	0.188156	yes
Bfab09g01480	295	184	184	184	no	n.a.	Hypothetical	Bcin09g01480	184	0.623729					>1	0.0986819	0.297363	0.737334	0.176272	0	0.26193	0	1.97448	0	0	0.964221	0.587741	yes
Bfab09g03300	266	266	266	266	no	n.a.	Hypothetical	Bcin09g03300	144	0.541353					>1	2.36393	2.69104	1.30836	4.28124	1.55346	2.43961	9.46542	3.05387	1.24803	2.05782	3.05894	3.77682	yes
Bfab09g03750	252	252	252	252	no	n.a.	Hypothetical	Bcin09g03750	173	0.686508	Premature stop	Frameshift	54		1	0	0	0.138076	0.433247	0	0.114265	0.126581	0.531081	0.113245	0.30212	0.178844	0.250374	yes
Bfab09g04260	193	154	145	145	no	n.a.	Hypothetical	Bcin09g04260	145	0.751295	Premature stop	Frameshift	125		1	0	0.485435	0	0	0.38111	0.173309	0	1.08845	0	0	0.594192	0.336527	yes
Bfab09g04360	325	325	325	325	no	n.a.	Hypothetical	Bcin09g04360	142	0.436923					>1	0.381833	0.402709	0.332849	0.639424	0.903321	0.532027	0.367954	0.629753	0	0.491138	2.98359	0.894487	yes
Bfab09g05360	411	440	672	672	no	yes	Methyltransferase	Bcin09g05360	333	0.810219					>1	0.493542	0.0849837	0.316085	0.377826	0.458699	0.346227	0.159105	0.109628	0.180604	0	2.5995	0.609767	yes
Bfab09g05370	342	275	382	382	no	n.a.	Hypothetical	Bcin09g05370	138	0.403509					>1	0.06871	0.0828188	0.136904	0.153417	0.0406377	0.0964975	0	0.145569	0.0776008	0	2.42131	0.528897	yes
Bfab10g00730	313	234	293	293	no	n.a.	Hypothetical	Bcin10g00730	204	0.651757	Premature stop	Point mut.	205	TGG to TGA	1	0.21039	0.126796	0.1572	0.234882	0	0.145853	0	0.194751	0	0.144864	0.272507	0.122424	yes
Bfab10g02910	350	350	350	350	no	n.a.	Hypothetical	Bcin10g02910	119	0.34					>1	1.29338	4.31313	2.23344	2.46434	19.1239	5.88563	0.119036	0	0	0	0.205615	0.0649303	yes
Bfab11g00050	411	411	411	411	no	n.a.	Hypothetical_membrane_protein	Bcin11g00050	346	0.841849	Premature stop	Point mut.	347	GAA to TAA	1	0.132906	0.520639	0.165508	0.178053	0.117908	0.223003	0.469375	0.237739	0	0	3.78735	0.898892	yes
Bfab11g01240	155	155	155	155	no	n.a.	Hypothetical	Bcin11g01240	120	0.774194	N-terminus	Frameshift	3		1	0.449551	0.135465	0.895724	0	0.132941	0.322736	0.194607	0.199953	0	0	0.077383	0.0943886	yes
Bfab11g04000	1072	1063	1072	1072	yes	yes	Glycosyl hydrolase family 65	Bcin11g04000	562	0.524254	Premature stop	Point mut.	563	TGG to TGA	1	0.0302111	3.35014	0.0300976	0.0944385	0	0.700978	0	0.525421	0	0	0	0.105084	yes
Bfab12g00810	151	192	192	192	no	n.a.	Hypothetical	Bcin12g00810	117	0.774834					>1	0.230691	3.61479	1.60877	6.90223	0.682196	2.60774	0.0343374	0.143956	0	0.086344	0.036592	0.060246	no
Bfab12g03250	742	742	742	742	no	yes	4'-phosphopantetheinyl transferase	Bcin12g03250	604	0.814016	N-terminus	Frameshift	152		1	22.0689	24.8271	21.7111	23.057	4.6771	19.2683	11.5879	33.195	44.9368	17.2514	24.6612	26.3265	yes
Bfab12g03300	427	411	383	383	no	n.a.	Hypothetical	Bcin12g03300	299	0.700234	Premature stop	Frameshift	289		1	1.22891	2.91314	2.93831	2.12199	3.24649	2.48977	2.50556	1.60551	0.820534	2.31288	3.42235	2.13337	yes
Bfab12g04260	381	381	381	381	no	no	FAD binding domain	Bcin12g04260	316	0.829396					>1	0.579815	5.64091	0.412597	1.07269	2.93935	2.12907	5.16528	4.49141	0.184564	1.82267	3.90101	3.11298	yes
Bfab12g04600	661	1208	661	661	no	yes	PIN domain of Yeast Endonuclease 1	Bcin12g04600	597	0.903177					>1	2.29661	1.62481	6.29196	10.0775	2.77567	4.61332	0.543454	1.42401	1.32258	1.60737	2.80617	1.54072	yes
Bfab12g05180	346	758	989	989	no	n.a.	Hypothetical	Bcin12g05180	254	0.734104	Premature stop	Frameshift	247		1	0.303155	0.121802	0.201344	0.0902524	0.239063	0.191124	0.0591623	0.137222	0.185252	0	0.369585	0.150244	yes
Bfab13g05840	515	416	416	416	no	yes	Cytochrome P450	Bcin13g05840	392	0.761165					>1	5.09097	0.266798	0.0826931	3.08893	0.0654564	1.71897	0	0.0509233	0	0	0.0194162	0.0140679	no
Bfab14g00350	1383	1021	1445	1445	no	yes	Ankyrin repeats protein	Bcin14g00350	1043	0.754158					>1	9.72433	7.41727	3.91044	14.2264	6.00595	8.25687	6.91199	0.0290779	0.0659013	5.78162	0.749586	2.70764	yes
Bfab14g01850	498	368	387	384	yes	no	Collagen triple helix repeat	Bcin14g01850	411	0.825301					>1	0.403303	4.17251	1.00447	0.630354	3.02137	1.8464	0.145627	70.3605	0.390853	1.3216	4.46236	15.3362	yes
Bfab14g02420	466	466	466	466	no	yes	Cytochrome P450	Bcin14g02420	147	0.315451					>1	2.12031	0.288547	0.306631	0.366526	3.39803	1.29601	0.168713	0.400945	0	0.182725	0.364647	0.223406	yes
Bfab15g02230	233	226	233	233	no	n.a.	Hypothetical	Bcin15g02230	189	0.811159	Premature stop	Frameshift	188		1	0.299701	0	0	1.73987	0.709017	0.549717	2.53219	0	0	0.324558	0.222143	0.615779	yes
Bfab15g02240	428	580	582	582	no	no	Cytochrome P450	Bcin15g02240	340	0.794393					>1	1.50586	0.0864319	0.321472	4.51511	32.9106	7.86789	23.3365	0.0963408	0.0623587	4.75849	16.4946	8.94966	yes
Bfab15g05060	753	1075	1032	1032	no	no	Argonaute protein, PIWI domain	Bcin15g05060	674	0.895086					>1	0.244422	0.653774	0.209304	0.975609	0.795083	0.575638	0.347913	0.606504	0	0.625157	1.07909	0.531733	yes
Bfab16g00130	575	575	575	575	no	yes	HET protein	Bcin16g00130	480	0.834783					>1	0.0608767	0.0366886	0.394212	0.489337	0.108014	0.217826	0.301743	0.228373	0.188113	0.0746759	1.25149	0.408879	yes
Bfab16g00920	414	401	506	506	no	n.a.	Hypothetical	Bcin16g00920	362	0.874396					>1	0.0693898	0.627287	0.241952	0.154935	1.64159	0.547031	0	0.740987	0.36193	0.372957	4.65265	1.22571	yes
Bfab16g02540	518	468	468	468	no	yes	Cytochrome P450	Bcin16g02540	271	0.523166					>1	4.5311	0.0738042	0.57951	0.191406	3.11443	1.69805	1.18972	0.14897	4.05145	4.5569	0.149332	2.01928	yes
Bfab16g04490	614	614	631	631	no	yes	dsRNA-specific ribonuclease	Bcin16g04490	537	0.874593					>1	0.0509419	0.0921034	0.431379	63.3783	0.210903	12.8327	0.050594	0.141407	0.160241	0.0636112	136.43	27.3691	yes
Bfab16g05130	629	623	623	623	no	yes	HET protein	Bcin16g05130	380	0.604134					>1	1.55844	1.44238	2.35661	1.04392	0.954641	1.4712	0.664363	0.296996	0.0791623	0.969857	0.481943	0.498464	yes
											Total number of stage-specifically expressed genes					2	3	3	2	8		5	1	1	2	10
aGenes encoding truncated BcB0510 proteins are shown in italics
bGenes with red background are in clusters
cUpregulation (>3-fold higher expression than average of all stages) of B. fabae genes
dUpregulation (>3-fold higher expression than average of all stages) of B. cinerea genes
eBelow threshold expression (RPKM < 2,00)
