# Supplementary material for: Genome Comparisons between Botrytis fabae and the Closely Related Gray Mold Fungus Botrytis cinerea Reveal Possible Explanations for Their Contrasting Host Ranges
Source: J Fungi (Basel). 2024 Mar 14;10(3):216. doi: 10.3390/jof10030216 (PMC10971195; doi:10.3390/jof10030216)
Supplement: Supplementary file 1 [file jof-10-00216-s001.zip › Table S11.xlsx]

## Sheet: Table S11 SM clusters
Table S11: SM gene clusters and genes in Botrytis spp., Monilinia fructicola and Sclerotinia sclerotiorum
Genes in bold encode SM key enzymes
Intact genes
Missing or truncated gene probably leading to loss of SM biosynthesis
Missing or truncated gene that might still allow SM biosynthesis
Abbreviations: pseud=pseudocinerea; calth=calthae; conv=convoluta; paeo= paeoniae; ellipt=elliptica; tulip=tulipae; galan=galanthina; hyac=hyacinthi; narcis=narcissicola; Mofr=Monilinia fructicola; Sclscl=Sclerotinia sclerotiorum
Symbols: x=present intact; (x)=present truncated; 0=absent
No	Known or predic-ted metabolite			B. cinerea B05.10		B. fabae G12		B. fabae			B. cinerea		Botrytis spp.												Expression in B. cinerea (RPKM)						Expression in B. fabae G12 (RPKM)
		Name	Function	Gene name	Size [aa]	Gene name	Size [aa]	11002	Bf611	Bf612	T4	DW1	pseud	calth	conv	paeo	ellipt	porri	tulip	galan	hyac	narcis	Mofr	Sclscl	Inf. Tissue	Ascospores	Germlings	Mycelium	Sclerotia	Mean	Inf. Leaves	Conidia	Germlings	Mycelium	Sclerotia	Mean
1	Botcinin, botcinic acid (Porquier et al. 2019)	BcBoa1	NmrA-like family	Bcin01g00010	310	Bfab10g0100010	310	x	x	x															239.626	0.692153	0.319952	160	0.162693	80.1602	181.035	0	11.2889	0.637508	15.2506	41.6424
		BcBoa2	Flavin-binding monooxygenase-like (Porquier et al. 2019)	Bcin01g00020	529	Bfab10g0100020	529	x	x	x															52.7309	0.176976	0.450909	17.7109	0.0632154	14.2266	37.8595	0.0643633	9.8416	0.119229	3.63191	10.3033
		BcBoa3	Cytochrome P450 monooxygenase	Bcin01g00030	506	Bfab10g0100030	506	x	x	x															258.075	0.276158	0.0510623	100.908	1.02058	72.0662	191.179	0.140338	6.23463	1.76779	23.344	44.5331
		BcBoa4	Cytochrome P450 monooxygenase	Bcin01g00040	495	Bfab10g0100040	495	x	x	x															125.161	0.616805	0.166023	46.0568	0.539448	34.5079	121.47	0.178989	7.07147	1.53847	15.879	29.2276
		BcBoa5	Alcohol dehydrogenase	Bcin01g00050	375	Bfab10g0100050	375	x	x	x															54.8409	3.26162	1.24758	16.0942	13.533	17.7955	63.3221	0.562037	5.24928	2.62368	9.26625	16.2047
		BcPks6/Boa6	Polyketide synthase (Dalmais et al. 2011)	Bcin01g00060	2460	Bfab10g0100060	2460	x	x	x	0	x	0	x	x	0	0	x	0	0	0	x	x	x	74.6062	1.3732	0.248156	38.8733	5.31664	24.0835	64.4968	0.720906	4.51735	2.59013	5.18263	15.5016
		BcBoa7	Cytochrome P450 monooxygenase	Bcin01g00070	535	Bfab10g0100070	535	x	x	x															129.484	32.2443	20.6075	100.782	2.8151	57.1866	124.106	10.2576	22.6968	8.60354	19.8183	37.0965
		BcBoa8	FAD-binding protein	Bcin01g00080	789	Bfab10g0100080	789	x	x	x															63.4406	3.85745	1.56067	45.9307	0.327064	23.0233	37.4136	1.34096	4.18706	3.29368	2.99749	9.84657
		BcPks9/Boa9	Polyketide synthase (Dalmais et al. 2011)	Bcin01g00090	2330	Bfab10g0100090	2330	x	x	x	0	x	0	x	x	0	0	x	0	0	0	x	x	x	113.718	4.83361	0.0623158	29.1532	0.233856	29.6002	70.4948	1.30223	5.37453	0.825261	5.27157	16.6537
		BcBoa10	Thioesterase	Bcin01g00100	270	Bfab10g0100100	270	x	x	x															85.3506	6.52433	0	15.2799	0	21.431	39.3412	0	0.532519	0.0954805	2.7188	8.5376
		BcBoa11	Transferase	Bcin01g00110	470	Bfab10g0100110	470	x	x	x															42.8342	0.884098	0.112821	9.08713	0.045201	10.5927	78.0214	0	0.519178	0.232721	3.12622	16.3799
		BcBoa12	Unknown (Porquier et al. 2019)	Bcin01g00120	220	Bfab10g0100120	220	x	x	x															93.8767	3.53418	0.229845	47.922	0.463283	29.2052	65.37	3.15555	12.3294	3.82613	7.13188	18.3626
		BcBoa13	Transcription factor Cys6	Bcin01g00130	568	Bfab10g0100130	568	x	x	x															44.0238	5.38184	2.17979	61.7146	1.09532	22.8791	33.7553	5.03581	35.4754	11.0213	10.2112	19.0998
2	Abscisic acid (Izquierdo-Bueno et al. 2018)	Bcaba5/BcSTC5	Sesquiterpene cyclase	Bcin01g03520	323	Bfab01g03520	323	x	x	x	x	x	0	x	0	(x)	(x)	0	(x)	0	(x)	0	0	0	9.93867	0.109481	0	0.407181	0.154806	2.12203	60.4847	2.39127	2.36209	2.72264	160.034	45.5989
		Bcaba3	Unknown	Bcin08g03880	440	Bfab08g03880	440	x	x	x	0	0	0	0	0	0	0	0	0	x	0	0	0	0	0.708387	5.1253	0.889095	0.917751	0.806993	1.68951	2.06732	3.92942	1.26742	0.710149	1.12864	1.82059
		Bcaba1	Cytochrome P450 monooxygenase	Bcin08g03850	509	none	0	0	0	0	0	0	0	x	0	0	0	0	0	x	0	x	0	0	0.408255	0.254528	0	0	0.0310435	0.138765
		Bcaba2	Cytochrome P450 monooxygenase	Bcin08g03840	527	none	0	0	0	0	0	x	0	x	0	0	0	0	0	x	0	x	0	0	12.7856	0.397078	0.114246	1.11444	0.0300054	2.88827
		Bcaba4	Dehydrogenase	Bcin08g03830	258	none	0	0	0	0	0	x	0	x	0	0	0	x	0	x	0	x	0	0	10.2645	0.269975	0	0.114661	0.0905147	2.14794
3	Coprogene siderophore (Bushley and Turgeon 2010)	BcNRPS6/NPS6	Nonribosomal peptide synthase	Bcin01g03730	2101	Bfab01g03730	2101	x	x	x	x	x	0	0	x	x	x	x	x	x	x	x	x	x	11.538	2.48782	6.36173	5.54666	1.21644	5.43013	22.816	2.14384	2.54664	12.3684	3.48364	8.6717
4	Retinal (Carotinoid)	BcPHS1	Squalene/phytoene synthase	Bcin01g04560	610	Bfab01g04560	610	x	x	x	x	x	0	x	x	x	x	x	x	x	x	x	x	x	20.8176	1.25397	0.47507	2.8938	10.3772	7.16353	1.99806	7.09483	5.35296	31.6391	10.6994	11.3569
			Retinal pigment epithelial membrane protein	Bcin01g04570	649	Bfab01g04570	649	x	x	x															21.8889	1.33777	1.7817	3.26487	35.4583	12.7463	3.61439	14.8904	9.35136	14.0447	21.2492	12.63
5	Diterpene		G protein-coupled receptor	Bcin01g04910	391	Bfab01g04910	391	x	x	x															8.47336	0.0798311	0	0.103903	1.33774	1.99897	40.9987	0.126711	0.06982	3.16097	4.51804	9.77485
		BcDTC1	Diterpene cyclase	Bcin01g04920	996	Bfab01g04920	996	x	x	x	x	x	0	0	0	0	0	x	0	0	0	0	0	0	1.86958	0.172803	0	0.482322	0.438689	0.59268	20.6125	0.72043	0.498893	0.418401	0.993626	4.64877
6	Peptide	BcNRPS7/NPS7	Nonribosomal peptide synthase	Bcin01g11450	1430	Bfab01g11450	1430	x	x	x	0	x	0	x	0	0	0	0	0	0	0	0	0	0	0.693669	0.174553	0.141949	0.568858	0.974794	0.510765	1.34771	0.694083	0.634706	1.70704	4.59412	1.79553
			Unknown	Bcin01g11460	332	Bfab01g11460	328	x	x	x															2.79236	0.46911	1.02571	1.49155	17.7908	4.7139	24.2225	6.85221	5.41728	11.7882	60.6959	21.7952
			Unknown	Bcin01g11470	194	Bfab01g11470	194	x	x	x															2.07238	0.192499	0.121671	0.5275	1.31828	0.846466	5.3303	0.566896	2.9675	7.28099	12.0538	5.6399
			Bifunctional P-450/NADPH-P450 reductase	Bcin01g11480	1059	Bfab01g11480	1059	x	x	x															0.350884	0.0976829	0.0276536	0.180485	0.00754741	0.13285	0.2749	0.165674	0.304297	0.409202	1.64393	0.5596
			o-methyltransferase protein	Bcin01g11490	371	Bfab01g11490	371	x	x	x															1.8012	0.848442	0.0705241	0.43284	0	0.6306	1.97947	0.908929	0.751253	0.799777	0.947739	1.07743
7	Amino acid containing polyketide		Unknown	Bcin01g11510	496	Bfab01g11510	496	x	x	x															3.52489	0	1.01984	10.9358	0.406064	3.17731	24.3409	9.35447	3.86585	8.75884	18.5689	12.9778
			Unknown	Bcin01g11520	508	Bfab01g11520	508	x	x	x															3.18353	1.15999	0.474974	1.78521	0.0485705	1.33046	5.31959	20.959	3.74285	1.69258	23.7539	11.0936
			Zinc-binding dehydrogenase	Bcin01g11530	382	Bfab01g11530	382	x	x	x															4.48709	5.79374	0.360488	3.72826	0.134085	2.90073	25.4519	88.2273	8.80172	3.9658	9.90912	27.2712
			HpcH/HpaI aldolase	Bcin01g11540	306	Bfab01g11540	306	x	x	x															4.26119	3.46052	1.50109	2.81877	1.37372	2.68306	8.19141	7.40507	71.8351	17.3755	25.2435	26.0101
		BcPKS5	Polyketide synthase	Bcin01g11550	4085	Bfab01g11550	4084	x	x	x	0	x	0	x	0	0	0	0	0	0	0	0	0	0	2.05455	1.17802	0.46543	1.94912	1.54083	1.43759	5.38498	1.96231	11.3866	7.13594	47.9806	14.7701
8	Polyketide		Unknown	Bcin02g01670	124	Bfab02g01670	92	x	x	x															1.61981	6.44439	0.72386	1.23766	4.75557	2.95626	0	2.49956	1.69032	1.17862	2.45297	1.56429
		BcPKS2	Polyketide synthase	Bcin02g01680	3183	Bfab02g01680	1758	3187	3187	3187	x	x	0	0	0	0	0	0	0	0	0	0	0	x	0.217188	0.383654	0.0473631	0.0767918	15.5324	3.25149	0.449468	0.223771	0.146015	0.549789	37.4823	7.77027
			Prolyl aminopeptidase	Bcin02g01690	467	Bfab02g01690	467	x	x	x															0.454052	0.217837	0.476582	1.17409	78.1232	16.0891	2.0979	0.677327	0.970368	3.04477	135.91	28.54
			Unknown	Bcin02g01700	372	Bfab02g01700	372	x	x	x															0.0176002	0	0	0	20.183	4.04012	0	0.0444897	0	0	2.31401	0.4717
			MFS transporter	Bcin02g01710	535	Bfab02g01710	535	x	x	x															0.210213	0.142798	0.0562702	0.244837	59.714	12.0736	0	0.10331	0.170776	0.0765503	30.7871	6.22754
9	HC Toxin-like peptide	BcNRPS4	HC-toxin synthetase protein	Bcin02g02380	2619	Bfab02g02380	1316	2608	2642	2642	x	x	0	0	0	x	x	x	x	x	x	x	x	x	0.889906	0.429323	0.0690706	0.329517	4.73404	1.29037	0.39623	0.587239	0.521676	18.3778	10.6482	6.10623
			MFS Transporter	Bcin02g02390	577	Bfab02g02390	577	x	x	x															3.17041	1.77483	1.21372	0.901977	32.3427	7.88073	2.31077	1.22684	0.959203	20.761	40.9352	13.2386
10	DHN Melanin (Schumacher 2015)	BcSMR1	Fungal specific transcription factor	Bcin02g08760	938	Bfab02g08760	938	x	x	x															1.22	0.46	0.26	1.49	11.79	3.04	0.88	2.65	1.77	1.63	203.36	42.06
		BcPks12	Polyketide synthase (Schumacher 2015)	Bcin02g08770	2147	Bfab02g08770	2147	x	x	x	x	x	0	x	x	x	x	x	x	x	x	x	x	x	0.49	0.73	0.38	0.4	12.87	2.97	0.51	0.76	0.37	0.97	866.76	173.88
		BcPks13	Polyketide synthase (Schumacher 2015)	Bcin03g08050	2138	Bfab03g08050	2138	x	x	x	x	0	0	0	x	x	x	x	x	x	x	x	x	x	13.02	2.95	48.8	20.74	1.66	17.43	15.28	4.05	256.97	2959.17	9.51	649
			Unknown (DUF3112)	Bcin03g08060	587	Bfab03g08060	587	x	x	x															0.03	0.13	0.05	0.05	0.01	0.05	0.11	0.1	1.08	0.75	0.03	0.41
			Alpha/beta hydrolase family	Bcin03g08070	272	Bfab03g08070	272	x	x	x															16.84	5.11	4.75	6.59	6.05	7.87	11.17	3.91	12.02	19.14	15.77	12.4
		Bcztf2	Transcription factor Cys6	Bcin03g08080	610	Bfab03g08080	610	x	x	x															1.26	1.86	1.83	0.98	3.95	1.98	1.44	2.73	28.06	3.94	5.74	8.38
		Bcztf1	Transcription factor Cys6	Bcin03g08090	650	Bfab03g08090	650	x	x	x															5.52	8.13	2.87	6.07	9.79	6.48	3.8	3.8	10.2	0.5	1.1	3.9
		Bcthr1/BcBrn1	THN reductase (Schumacher 2015)	Bcin03g08100	266	Bfab03g08100	266	x	x	x															49.55	24.81	396.5	63.7	33.83	113.68	25.31	7.03	214.13	865.21	937.59	409.85
		BcSCD1	Scytalone dehydratase (Schumacher 2015)	Bcin03g08110	167	Bfab03g08110	167	x	x	x															67.64	88.54	467.49	124.12	155.28	180.61	23.67	8.34	530.23	602.95	3095.04	852.05
11	Polyketide	BcPKS18	Polyketide synthase	Bcin02g08830	2532	Bfab02g08830	2531	x	x	x	x	x	0	x	x	x	x	x	x	x	x	x	0	0	1.25	4.17	0.96	2.72	2.97	2.41	2.99	47.98	1.93	2.69	4.58	12.03
			Unknown	Bcin02g08840	355	Bfab02g08840	205	356	338	338															0.3	0.71	0.08	0.33	0.36	0.36	0	1.52	0.07	0.06	0	0.33
			O-methyltransferase	Bcin02g08850	396	Bfab02g08850	396	x	x	x															1.69	0.42	0.3	2.52	0.26	1.04	0.87	2.15	0.29	0.49	0.3	0.82
			Unknown	Bcin02g08860	454	Bfab02g08860	454	x	x	x															0.02	0.09	0.2	0.14	2.01	0.49	0	0.27	0.03	0	3.65	0.79
			Phosphotransferase	Bcin02g08870	467	Bfab02g08870	467	x	x	x															0.04	0.15	0	0	1.85	0.41	0	0.95	0.11	0.07	0.49	0.32
			Unknown	Bcin02g08880	361	Bfab02g08880	361	x	x	x															0	0.57	0	0.15	498.42	99.83	0.08	0.1	0	0.04	1214.84	243.01
			Unknown (DUF3328)	Bcin02g08890	226	Bfab02g08890	226	x	x	x															0	1.1	0	0.13	125.36	25.32	0	0	0	0.05	213.36	42.68
			Unknown (DUF3328)	Bcin02g08900	244	Bfab02g08900	244	x	x	x															0.25	0.38	0.16	0.98	405.73	81.5	0	0.07	0	0.89	1039.95	208.18
			Unknown	Bcin02g08910	59	Bfab02g08910	59	x	x	x															0.08	0	0	0.79	723.4	144.85	0	0	0	0.33	1077.12	215.49
			Cytochrome P450 monooxygenase	Bcin02g08920	495	Bfab02g08920	495	x	x	x															1.86	0.65	0.96	9.47	59.71	14.53	0.26	0.64	0.69	1.27	266.25	53.82
			MFS allantoate transporter	Bcin02g08930	507	Bfab02g08930	507	x	x	x															2.91	0.52	0.36	1.14	8.05	2.59	1.35	0.95	1.54	11.02	1.96	3.36
12	Polyketide		Unknown	Bcin03g01930	802	Bfab03g01930	420	498	881	1225															0.18	0.05	0	0.28	0.15	0.13	0.64	0.51	0.85	1.46	0.29	0.75
			Unknown	Bcin03g01940	208	Bfab03g01940	402	x	x	x															5.55	0	0	0	0.02	1.11	0.24	0.09	0.14	1.29	0.09	0.37
			Unknown	Bcin03g01950	240	Bfab03g01950	240	x	x	x															1.14	0	0	0	0	0.23	0	0.18	0	0.26	0	0.09
			Unknown	Bcin03g01960	270	Bfab03g01960	270	x	x	x															12.97	7.76	0.78	1.39	3.6	5.3	17.6	0.78	6.77	7.45	3.83	7.28
			Unknown	Bcin03g01970	265	Bfab03g01970	265	x	x	x															24.18	7.59	5.71	16.39	14.34	13.64	23.48	1.07	13.04	7.78	14	11.87
			Transcription factor Cys6	Bcin03g01980	641	Bfab03g01980	602	x	x	x															6.41	1.58	0.14	1.1	0.76	2	5.56	1.64	9.19	1.92	3.71	4.4
			Oxidoreductase	Bcin03g01990	333	Bfab03g01990	333	x	x	x															0.05	0.71	0	0	0.1	0.17	0.21	0.13	1.46	0.28	0.12	0.44
			Serine hydrolase	Bcin03g02000	271	Bfab03g02000	271	x	x	x															0.44	2.1	1.33	1.1	0.28	1.05	2.19	1.86	4.05	2.48	3.43	2.8
		BcPKS17	Polyketide synthase	Bcin03g02010	2591	Bfab03g02010	2585	x	x	x	x	0	0	0	0	0	0	0	0	x	0	0	0	0	0.14	1.1	0.05	0.16	0.27	0.34	0.39	0.44	0.2	0.39	0.41	0.37
			Oxidoreductase	Bcin03g02020	377	Bfab03g02020	377	x	x	x															1.4	0.23	0.16	0.44	2.75	1	2.85	0.72	1.07	4.39	0.98	2
			Serine carboxypeptidase	Bcin03g02030	553	Bfab03g02030	553	x	x	x															3.09	1.95	0	1.03	0.93	1.4	1.31	1.73	1.07	3.67	0.9	1.74
			Protease S8 tripeptidyl peptidase	Bcin03g02040	642	Bfab03g02040	642	x	x	x															0.63	0.12	0.05	0.05	0.04	0.18	0.83	1.2	0.54	1.91	0.32	0.96
			ABC transporter	Bcin03g02050	1425	Bfab03g02050	1450	x	x	x															3.78	0.67	0.15	2.16	3.99	2.15	16	8.3	9.65	15.06	14.94	12.79
			Short-chain dehydrogenase	Bcin03g02060	297	Bfab03g02060	297	x	x	x															0.66	0.26	0	0.4	0.91	0.44	2	0.4	0.5	0.99	4.26	1.63
			GMC oxidoreductase	Bcin03g02070	622	Bfab03g02070	622	x	x	x															0.27	0.17	0.1	0.38	0.73	0.33	0.27	0.45	0.11	0.19	1.58	0.52
			Flavin-containing monooxygenase	Bcin03g02080	566	Bcin03g02080	567	x	x	x															1.93	1.51	0.48	1.45	0.99	1.27	0.87	0.89	0.59	0.69	0.99	0.8
			MFS transporter	Bfab03g02090	423	Bcin03g02090	423	x	x	x															2.01	0.12	0.43	1.36	1.05	0.99	0.21	0.47	0.18	0.76	0.59	0.44
			Serine esterase	Bfab03g02100	306	Bcin03g02100	306	x	x	x															4.68	0.33	0.08	5.23	1.42	2.35	1.11	0.28	0.18	0.29	0.55	0.48
			Cytochrome P450 monooxygenase	Bfab03g02110	507	Bcin03g02110	507	x	x	x															4.98	0.07	0.28	3.83	0.7	1.97	6.87	0.23	0.61	1.21	1.54	2.09
			Tetratricopeptide repeat protein	Bfab03g02120	1150	Bcin03g02120	1150	x	x	x															4.31	0.6	0.58	1.56	1.35	1.68	7.64	1.16	0.6	1.67	5.9	3.39
13	Amino acid containing polyketide		Unknown	Bcin03g04350	211	Bfab03g04350	227	x	x	x															0.47	1.55	0	0	2.06	0.82	0	1.39	0.08	5.22	0.18	1.37
		BcPKS3	Polyketide synthase	Bcin03g04360	3941	Bfab03g04360	666	2438	3424	3424	x	x	0	0	0	0	0	0	0	0	0	0	0	0	1.47	0.67	0.51	1.44	12.64	3.35	0.15	0.27	0.25	1.76	0	0.49
			Alkohol dehydrogenase	Bcin03g04370	378	Bfab03g04370	375	x	x	x															0.92	0.83	0.08	0.83	13.71	3.27	0	0.22	0.05	1.12	0	0.28
			EthD domain	Bcin03g04380	165	none	0	0	0	0															1.93	24.02	1.09	3.19	1647.79	335.6
			Prolyl oligopeptidase	Bcin03g04390	431	none	0	0	0	0															0.08	0.34	0	0.07	11.15	2.33
			MFS transporter	Bcin03g04400	577	none	0	0	0	0															0.06	0.28	0	0.11	26.16	5.32
			Membrane protein	Bcin03g04410	405	none	0	0	0	0															0.02	0.09	0	0	15.34	3.09
			Transcription factor	Bcin03g04420	374	none	0	0	0	0															0.01	0.84	0	0	32.01	6.57
			Serine Protease	Bcin03g04430	539	Bfab03g04430	539	x	x	x															3.75	4.84	2.35	1.77	14.98	5.54	5.7	4.09	1.36	2.06	9.46	4.53
			Transcription factor	Bcin03g04440	838	Bfab03g04440	838	x	x	x															2.64	1.21	0.72	1.61	15.19	4.28	4.22	2.57	0.59	1.77	9.11	3.65
			RTA1 domain protein	Bcin03g04450	301	Bfab03g04450	302	x	x	x															1.39	0.75	0.9	0.28	10.45	2.75	1.32	47.81	0.88	1.62	6.83	11.69
14	Polyketide		Thioesterase	Bcin03g06460	355	Bfab03g06460	355	x	x	x															0.413069	0.149634	0.338886	5.19021	9.85474	2.64241	2.03186	8.29348	0.874098	3.87689	475.116	98.0385
			Unknown	none	0	Bfab03g06465	358	358	358	358																					0	0.0531861	0	0	127.199	25.4504
			MFS multidrug transporter	none	0	Bfab03g06466	560	548	548	548																					0	0.157863	0.0260956	0.0233946	108.383	21.718
			Serine hydrolase	none	0	Bfab03g06467	205	205	205	205																					0.126588	0.228873	0.252226	0.847949	55.9273	11.4766
		BfPKSX	Polyketide synthase	Bcin03g06470	550	Bfab03g06470	2512	2512	2512	2512															0.629999	0.387874	0.17008	0.615365	12.5687	2.46183	1.11	0.28	0.18	0.29	0.55	0.48
15	Diterpene	BcDTC2	Diterpene cyclase	none	0	Bfab03g06476	260	186	186	186	x	x	0	0	x	(x)	x	(x)	x	(x)	(x)	(x)	0	0							0	0	0.227578	0.102012	0.0675529	0.0794286
16	Polyketide	BcPKS20	Polyketide synthase	Bcin04g00640	2657	Bfab04g00640	2654	2676	2676	2676	x	x	0	x	(x)	x	0	0	0	x	0	(x)	0	0	2.34	0.21	0.29	2.4	0.11	1.07	6.56	0.92	4.36	11.11	0.96	4.78
			Unknown	Bcin04g00650	474	none	0	0	0	0															0	0	0	0	0	0
17	HC Toxin-like peptide		Aphinganine hydroxylase Sur2	Bcin04g01340	360	Bfab04g01340	360	x	x	x															0.07	0.3	0	0	6.1	1.29	0	0.1	0.04	0.23	220.03	44.08
			Sphinganine hydroxylase protein	Bcin04g01350	355	Bfab04g01350	355	x	x	x															0.14	0.36	0	0.13	23.19	4.76	0	0	0.04	0	401.08	80.22
			MFS transporter	Bcin04g01360	504	Bfab04g01360	504	x	x	x															0.88	10.7	0.24	0.13	25.3	7.45	1.44	0.55	0.57	0.69	299.35	60.52
			Alkohol dehydrogenase	Bcin04g01370	361	Bfab04g01370	361	x	x	x															0.04	5.68	0.08	0.13	11.5	3.49	0.09	0.11	0.35	0.08	353.36	70.8
			Pyrroline-5-carboxylate reductase	Bcin04g01380	317	Bfab04g01380	317	x	x	x															0.75	2.05	0.66	0.68	84.54	17.74	0.83	1.24	0.87	0.28	677.61	136.17
		BcNRPS5	HC-toxin synthetase protein	Bcin04g01390	1314	Bfab04g01390	1314	x	x	x	x	x	0	x	x	x	x	x	x	x	x	x	x	x	2.77	1.11	0.05	0.87	1.03	1.16	2.47	2.49	1.04	1.19	35.25	8.49
18	Sesquiterpene	BcSTC4	Sesquiterpene cyclase (Collado and Viaud)	Bcin04g03550	441	Bfab04g03550	410	x	x	x	x	x	0	(x)	0	(x)	x	0	0	(x)	0	0	0	0	4.86	0.97	51.23	29.99	0.24	17.46	0	0.93	0.04	0	0.04	0.2
19	Indole-diterpene		Cytochrome P450 monooxygenase	Bcin05g05630	498	none	0	0	0	0															1.23	0.07	0.22	1.7	10.52	2.75
			Unknown	Bcin05g05640	360	Bfab05g05640	212	x	x	x															0.91	0.59	0.17	0.43	4.87	1.39	0.96	1.81	0.82	2.2	1.29	1.41
			Integral membrane protein	Bcin05g05650	229	Bfab05g05650	216	x	x	x															0.11	0.09	0	0	2.6	0.56	0.15	0.36	0.22	0.13	0.18	0.21
			Integral membrane protein	Bcin05g05660	243	Bfab05g05660	188	x	x	x															0.05	0.2	0	0	0.8	0.21	0	0.09	0	0.13	0	0.04
		BcPax1	Polyprenyl synthetase	Bcin05g05670	338	Bfab05g05670	338	x	x	x	0	x	0	0	0	0	0	0	0	0	0	0	0	0	0	0	0	0.09	0.37	0.09	0.09	0	0.05	0.04	0.06	0.05
			Pyridine nucleotide-disulphide oxidoreductase	Bcin05g05680	557	Bfab05g05680	514	x	x	x															0.12	0.07	0.05	0.05	0.69	0.2	0	0.22	0.03	0.08	0.04	0.07
20	Polyketide		Unknown	Bcin05g06160	1159	Bfab05g06160	1163	x	x	x															0.49	1.72	0.29	0.48	4.52	1.5	2.2	1.2	3.3	4.09	3.33	2.82
			Transcription factor Zn, C2H2	Bcin05g06170	219	Bfab05g06170	138	0	222	222															0	1.86	0	0	205.62	41.5	0.25	0	0	0	14.32	2.92
			Unknown	Bcin05g06180	588	none	0	0	0	0															5.74	4.22	4.2	4.67	12.74	6.31
			Transcription factor Cys6	Bcin05g06190	724	none	0	0	0	0															2.33	4.39	1.12	2.24	5.55	3.13
			Alcohol dehydrogenase	Bcin05g06200	370	none	0	0	0	0															1.47	6.79	0.65	1.3	10.79	4.2
			Methyltransferase domain-containing protein	Bcin05g06210	280	Bfab05g06210	280	x	x	x															0.71	0.33	0	0.06	32.17	6.65	0.55	0.59	0	0.05	66.36	13.51
		BcPKS15	Polyketide synthase	Bcin05g06220	2126	Bfab05g06220	2126	x	x	x	x	x	0	(x)	0	0	x	0	x	x	x	(x)	0	0	0.18	0.06	0.21	0.13	2.99	0.71	0.11	2.12	0.1	0.21	25.13	5.53
			g-protein beta wd- 40 repeats containing protein	Bcin05g06230	241	none	0	0	0	0															0.42	0	0	0.25	1.29	0.39
			Metalloprotease	Bcin05g06240	549	Bfab05g06240	549	549	0	0															0.84	0.38	0	0.16	0.66	0.41	0.09	0	0.05	0.04	0.06	0.05
			Unknown	Bcin05g06250	343	Bfab05g06250	345	345	0	0															10.88	0.26	0	0.83	2.4	2.87	270.07	15.41	142.09	91.74	210.25	145.91
			Unknown	Bcin05g06260	69	Bfab05g06260	69	233	232	232															0.34	9.75	0	1.7	0.67	2.49	0.3	0.36	0	0	0	0.13
21	Polyketide		Alcohol dehydrogenase protein	Bcin05g08390	348	Bfab05g08390	348	x	x	x															0.31	0.69	1.3	0.14	0.85	0.65	10.65	19.93	32.52	16.51	1.33	16.19
		BcPKS21	Polyketide synthase	Bcin05g08400	2571	none	0	0	0	0	(x)	0	0	0	x	x	x	0	x	x	x	x	0	x	41.5	0.03	0.18	16.9	0.02	11.72
22	Polyketide	BcPKS8	Polyketide synthase	Bcin07g02920	2249	Bfab07g02920	2249	x	x	x	x	0	0	x	x	x	x	x	x	x	x	x	x	x	2.15	1.45	14.48	7.41	2.08	5.51	6.71	30.23	100.58	12.24	4.39	30.83
23	Polyketide	BcPKS19	Polyketide synthase	Bcin08g00290	2129	none	0	0	0	0	x	x	0	0	0	0	0	0	x	0	x	0	0	0	0.2	0.02	0.04	0.3	2.49	0.61
			Glutathione S-transferase	Bcin08g00300	250	none	0	0	0	0															8.24	0.24	0.72	2.78	266.77	55.75
			Unknown	Bcin08g00310	369	none	0	0	0	0															1.97	0.78	0.73	1.27	123.75	25.7
			Cytochrome P450 monooxygenase	Bcin08g00320	520	none	0	0	0	0															1.62	1.19	0.06	0.64	24.68	5.64
			Unknown	Bcin08g00330	534	none	0	0	0	0															1.83	0.78	0.23	0.96	47.66	10.29
			MFS multidrug transporter	Bcin08g00340	531	none	0	0	0	0															0.49	0.08	0.23	0.34	84.1	17.05
24	Sesquiterpene (trichodiene)		Haloacid dehalogenase-like hydrolase	Bcin08g02340	193	Bfab08g02340	193	x	x	x															0.26	0.32	0.23	0.05	3.3	0.83	1.63	1.09	1.35	4.92	2.35	2.27
		BcSTC2	Trichodiene synthase	Bcin08g02350	329	Bfab08g02350	329	x	x	x	0	x	0	x	x	x	0	(x)	x	x	x	x	0	0	2.95	3.08	2.74	2.35	12.14	4.65	4.04	4.42	9.63	11.1	5.03	6.84
25	Diterpene	BcDTC3	Diterpene cyclase	Bcin08g03560	573	Bfab08g03560	290	701	643	643	x	(x)	0	(x)	x	x	x	0	x	x	x	x	0	0	0.04	0.06	0.04	0.18	0.23	0.11	0	0	1.38	0	0.21	0.32
			Cytochrome P450 monooxygenase	Bcin08g03570	495	Bfab08g03570	140	495	495	495															0.87	0.24	0.11	0.77	3.06	1.01	0.4	0.12	0	0	0	0.1
			MFS multidrug transporter	Bcin08g03580	131	Bfab08g03580	127	x	x	x															0.38	0	0	0	1.14	0.3	0	0	0	0	0	0
			Cytochrome P450 monooxygenase	Bcin08g03590	305	Bfab08g03590	199	194	254	254															0.03	0.07	0	0	2.2	0.46	0	0.1	0	0	0	0.02
			Multicopper oxidase	Bcin08g03600	96	Bfab08g03600	171	225	316	316															0.22	1.03	0	0.16	0.85	0.45	0	0.22	0	0.08	0.33	0.13
26	Polyketide		Enoyl reductase like Zinc-binding oxidoreductase	none	0	Bfab09g04545	348	348	348	348																					0.47032	0.803102	0.117138	0	5.74875	1.42786
		BfabPKSY	Polyketide synthase	none	0	Bfab09g04546	2345	2305	2317	2317																					0	0.00808027	0.0200356	0	0.0317187	0.0119669
			Protein kinase	Bcin09g04550	1188	Bfab09g04550	1173	1173	940	940															5.51682	14.8526	5.24691	7.21776	9.32623	7.78444	10.2665	60.0676	13.9656	22.2738	17.9235	24.8994
			Transcription factor Zn2 Cys6	none	0	Bfab09g04555	416	296	355	301																					0.807949	0.486926	0.442702	0.757684	2.96268	1.09159
27	Amino acid containing polyketide	BcPKS7	Polyketide synthase	Bcin10g00040	4053	none	0	0	0	0	(x)	(x)	0	0	0	0	0	0	0	0	0	0	(x)	0	6.34	0.05	0.03	14.65	0.11	4.23
28	Peptide-polyketide Gramillin (Bahadoor et al. 2018)		MFS transporter	Bcin11g02620	527	Bfab11g02620	532	x	x	x															1.3	0.81	0.4	7.37	0.53	2.08	20.1	27.42	24.13	159.75	19.8	50.24
			Phytanoyl-CoA dioxygenase	Bcin11g02630	298	Bfab11g02630	298	x	x	x															57.63	4	0.3	5.34	23.1	18.07	721	5.3	39.55	3093.11	172.92	806.38
			Cyclohexanone 1,2-monooxygenase	Bcin11g02640	534	Bfab11g02640	534	x	x	x															5.95	1.01	0.28	0.76	0.79	1.76	132.07	6.52	17.7	357.55	23.06	107.38
		BcNRPS8	Nonribosomal peptide synthetase	Bcin11g02650	1610	Bfab11g02650	1610	x	x	x	0	0	0	x	x	x	x	x	x	x	x	x	0	0	3.01	0.18	0.13	0.47	0.06	0.77	11.67	0.28	0.93	60.77	2.45	15.22
			Methyl transferase domain	Bcin11g02660	281	Bfab11g02660	281	x	x	x															41.61	0.9	0	0.8	2.06	9.08	157.17	2.02	7.25	930.53	32.8	225.95
			Gluconate 5-dehydrogenase protein	Bcin11g02670	264	Bfab11g02670	264	x	x	x															158.66	0.34	0.11	11.97	3.56	34.93	220.76	1.11	11.77	710.05	79.53	204.64
			AMP-dependent synthetase and ligase	Bcin11g02680	552	Bfab11g02680	552	x	x	x															12.23	0.16	0	0.37	0.4	2.63	26.82	0.38	1.36	412.03	7.24	89.57
			EF-hand calcium-binding domain protein	Bcin11g02690	261	Bfab11g02690	261	x	x	x															8.84	0.37	0	0.11	0.12	1.89	31.52	0.53	0.81	416.92	5.47	91.05
		BcPKS4	Polyketide synthase	Bcin11g02700	2457	Bfab11g02700	2457	x	x	x	x	x	0	x	x	x	x	(x)	x	x	x	x	0	0	8.2	24.96	0.27	2.34	8.19	8.79	31.02	7.03	5.67	229.33	12.77	57.16
29	Ferrichrome siderophore (Bushley and Turgeon 2010)	BcNRPS2	Nonribosomal siderophore peptide synthase	Bcin12g00690	4919	Bfab12g00690	4919	x	x	x	x	x	0	x	x	x	x	x	x	x	x	x	x	x	6.42	2.39	1.2	4.12	5.43	3.91	20.21	9.29	8.71	11.72	16.76	13.34
			ABC transporter	Bcin12g00700	1268	Bfab12g00700	1268	x	x	x															3.21	2.68	0.64	0.57	5.98	2.62	4.87	12.41	3.33	4.97	2.2	5.56
30	Peptide		NAD-dependent epimerase/dehydratase	Bcin12g04960	221	Bfab12g04960	221	x	x	x															4.39	3.51	1.63	3.57	203.83	43.39	2.31	0.73	2.06	2.93	5.6	2.73
			Monooxygenase	Bcin12g04970	424	Bfab12g04970	424	x	x	x															1.55	2.23	0.92	0.59	23.32	5.72	0.37	0	0.26	0.42	4.29	1.07
		BcNRPS1	Nonribosomal peptide synthase	Bcin12g04980	1592	Bfab12g04980	1592	x	x	x	x	x	0	x	x	x	x	x	x	x	x	x	x	x	0.32	0.11	0.09	0.24	1.15	0.38	0.29	0.28	0.93	0.29	0.44	0.44
31	Botrydial (Porquier et al. 2016)	Bcbot4	Cytochrome P450 monooxygenase	Bcin12g06370	526	Bfab12g06370	526	x	x	x															67.26	6.07	1.77	938.7	10.1	204.78	35.95	7.28	27.95	94.06	24.26	37.9
		Bcbot1	Cytochrome P450 monooxygenase	Bcin12g06380	510	none	0	0	0	0															114.83	0.21	0.61	4486.38	0.17	920.44
		Bcbot2, BcSTC1	Sesquiterpene cyclase	Bcin12g06390	399	none	0	0	0	0	no	x	0	0	0	x	x	x	0	0	0	0	(x)	0	88.8	0.11	0.98	1806.48	0.06	379.29
		Bcbot3	Cytochrome P450 monooxygenase	Bcin12g06400	567	none	0	0	0	0															73.56	2.39	0.9	1481.32	1.6	311.95
		BcBot5	Acetyl transferase	Bcin12g06410	545	none	0	0	0	0															22.25	1.38	0.44	935.76	0.12	191.99
			Transcription factor Zn2 Cys6	Bcin12g06420	484	none	0	0	0	0															10.4473	2.19599	2.61187	228.811	3.56811	44.0979
			Short chain dehydrogenase	Bcin12g06430	317	none	0	0	0	0															219.524	52.4508	9.10516	2255.83	7.23557	476.014
32	Aflatoxin-like polyketide		Unknown	Bcin13g01460	281	Bfab13g01460	281	x	x	x															1.77	1.77	1.6	0.97	2.73	1.77	0.79	1.5	1.86	5.56	6.96	3.33
			FAD/FMN-containing isoamyl alcohol oxidase	Bcin13g01470	586	Bfab13g01470	586	x	x	x															0.61	0.07	0.21	0.93	0.51	0.47	0.92	0.83	2.86	3.1	5.06	2.55
			Aflatoxin biosynthesis ketoreductase nor-1	Bcin13g01480	256	Bfab13g01480	163	256	256	256															0.63	0.08	0.12	0.42	1.63	0.57	0.34	0.31	1.57	1.11	4.26	1.52
			Cytochrome P450 monooxygenase	Bcin13g01490	550	Bfab13g01490	550	x	x	x															0.04	0.04	0	0	0.01	0.02	0	0.09	0.18	0.18	0.27	0.14
			Alpha/beta hydrolase family	Bcin13g01500	301	Bfab13g01500	301	x	x	x															0.35	0.48	0.1	0.1	0.34	0.28	0	0.24	0.1	0	0.24	0.12
		BcPKS10	Polyketide synthase	Bcin13g01510	2417	Bfab13g01510	2417	x	x	x	x	x	0	x	x	x	x	x	x	x	x	x	x	x	0.37	0.98	0.26	0.59	0.4	0.52	0.84	0.62	1.05	0.77	0.41	0.74
			Ankyrin repeat-containing protein	Bcin13g01520	382	Bfab13g01520	382	x	x	x															4.01	8.79	12.36	8.29	13.8	9.45	3.81	15.3	17.91	6.31	15.99	11.86
			Unknown	Bcin13g01530	367	Bfab13g01530	309	309	309	309															0.13	0	0	0	0	0.03	0	0.13	0	0	0.06	0.04
			RNA binding protein	Bcin13g01540	629	Bfab13g01540	601	x	x	x															0.16	0.03	0.62	0.4	0	0.24	0	0.13	0.08	0.39	0	0.12
			Unknown	Bcin13g01550	119	Bfab13g01550	119	x	x	x															0.2	0	1.51	1	0	0.54	0.29	0.18	0.15	0	0	0.12
33	Oxalic acid	Bcoah	Oxaloacetate hydrolase	Bcin12g01020		Bfab12g01020	366	x	x	x	x	x	0	x	x	x	x	x	x	x	x	x	x	x	4400.49	74.7124	0.164813	11.2463	57.2832	1434.06	7694.1	3.29787	0.284782	418.119	167.955	1656.75
34	Pyrones, resorcylic acids and resorcinols (Jeya et al. 2012)	BcCHS1/BPKS	Chalcone synthase	Bcin13g02130	499	Bfab13g02130	499	x	x	x	x	x	0	x	x	x	x	x	x	x	x	x	x	x	103.5	37.85	29.32	81.9	11.92	52.89	48.04	39.71	46.37	70.59	11.53	43.25
35	Sesquiterpene	BcSTC3	Sesquiterpene cyclase	Bcin13g05830	411	Bfab13g05830	408	x	x	x	0	x	0	0	0	0	x	0	x	x	x	x	0	0	0.77	0.36	1.1	1.47	0	0.74	1.73	0.18	0.04	0.13	0	0.42
			Cytochrome P450 monooxygenase	Bcin13g05840	392	Bfab13g05840	515	416	416	416															0	0.05	0	0	0.02	0.01	5.09	0.27	0.08	3.09	0.07	1.72
			Integral membrane protein	Bcin13g05850	387	Bfab13g05850	387	x	x	x															0.28	0.05	0	0.39	0.08	0.16	2.7	0.34	0.71	1.42	1.08	1.25
			Glucose dehydrogenase protein	Bcin13g05860	553	Bfab13g05860	553	x	x	x															8.35	0.07	0.44	11.71	0.3	4.18	57.76	0.21	1.74	15.22	0.6	15.11
			Gmc oxidoreductase protein	Bcin13g05870	620	Bfab13g05870	609	x	x	x															2.94	0.81	0.54	12.86	20.28	7.49	35.57	1.56	3.19	6.96	7.17	10.89
			Unknown	Bcin13g05880	813	none	0	0	0	0															4.23	0.37	0.11	2.88	6.32	2.78
36	Polyketide		myo-inositol-1-phosphate synthase protein	Bcin14g00550	549	Bfab14g00550	551	x	x	x															0.17	0.27	0.11	0.03	0.09	0.13	0	0.18	0.02	0	0.14	0.07
			Enoyl-(Acyl carrier protein) reductase	Bcin14g00560	139	Bfab14g00560	277	273	0	0															0.05	3.89	0.22	0	226.05	46.04	0	0	0	0	29.82	5.96
			Serine hydrolase	Bcin14g00570	194	none	0	0	0	0															0.02	1.64	0.15	0	77.14	15.79
			MFS multidrug transporter	Bcin14g00580	566	none	0	0	0	0															0.03	1.32	0.05	0	84.36	17.15
				Bcin14g00590	380	none	0	0	0	0															0	3.19	0	0	92.16	19.07
		BcPKS1	Polyketide synthase	Bcin14g00600	2592	Bfab14g00600	1455	1745	1386	1745	x	x	0	0	0	0	(x)	0	0	0	0	0	0	0	0	5.46	0.02	0.05	153.25	31.76	0	0.01	0	0.01	7.09	1.42
37	Peptide-polyketide		Cytochrome P450 monooxygenase	Bcin14g01240	522	none	0	0	0	0															5.71	7.71	4.22	6.18	25.72	9.91
			Stress responsive A/B barrel domain protein	Bcin14g01250	142	none	0	0	0	0															3.5	0.12	0.42	0.13	5.37	1.91
			Class III aminotransferase	Bcin14g01260	511	none	0	0	0	0															2.49	0.57	0.12	0.34	4.92	1.69
			Cytochrome P450 monooxygenase	Bcin14g01270	524	none	0	0	0	0															0.96	0.16	0	0	1.43	0.51
		BcPKS11	Polyketide Synthase	Bcin14g01290	2545	none	0	0	0	0	x	0	0	0	0	0	0	0	0	x	0	x	0	0	2.72	0.01	0.01	0.02	1.55	0.86
		BcNRPS9	Nonribosomal peptide synthase	Bcin14g01300	4408	none	0	0	0	0	x	0	0	0	0	0	0	0	0	x	0	x	0	0	0.78	0.64	0.68	0.48	2.19	0.95
			Unknown	Bcin14g01310	199	none	0	511	0	0															0.16	0	0	0	0.38	0.11
			Unknown	Bcin14g01320	292	Bfab14g01320	527	511	292	292															0.45	0	0.21	0.12	1.15	0.39	0.28	1.83	0.87	1.57	1.35	1.18
			MFS multidrug transporter	Bcin14g01330	567	Bfab14g01330	391	391	504	504															0.34	0.21	0.27	0.84	2.78	0.88	0.24	0.46	0.41	0.25	2.52	0.78
			tfdA family taurine dioxygenase	Bcin14g01340	386	Bfab14g01340	402	x	x	x															0.22	0.3	0	0.12	1.4	0.41	0.15	0.44	0.29	0.2	23.61	4.94
			Polyketide cyclase	Bcin14g01350	143	Bfab14g01350	90	710	710	710															0.23	4.95	0.42	0.46	5.03	2.22	0	1.48	0	0	0	0.3
38	Alkaloid		Cytochrome p450 alkane hydroxylase	Bcin14g04880	560	Bfab14g04880	549	x	x	x															0.06	0.36	0	0	0.06	0.1	0.13	0.2	0.04	0.17	0.02	0.11
			Nucleoside-diphosphate-sugar epimerase protein	Bcin14g04890	229	Bfab14g04890	229	x	x	x															0.2	0.07	0	0.13	3.62	0.8	1.37	2.48	2.58	1.16	15.06	4.53
		BcDMATS2	Dimethylallyl tryptophan synthase protein	Bcin14g04900	365	Bfab14g04900	365	x	x	x	(x)	x	0	x	(x)	(x)	x	x	x	x	x	x	0	x	0.05	0.15	0	0	1.83	0.41	0.1	0.17	0.1	0.21	4.02	0.92
			Unknown	Bcin14g04910	134	Bfab14g04910	142	x	x	x															0	0	0	0	0.42	0.08	0.74	0.44	0.37	0	0.44	0.4
39	Polyketide		Nacht domain protein	Bcin16g01790	1462	Bfab16g01790	1462	x	x	x															0.16	1.69	0.02	0.28	3.94	1.22	0.34	0.9	0.61	0.24	13.73	3.16
			MFS transporter	Bcin16g01800	287	Bfab16g01800	287	x	x	x															0.32	1.99	0.1	0.57	8.72	2.34	0.2	0.31	2.91	0.73	12.06	3.24
			Unknown	Bcin16g01810	283	Bfab16g01810	283	x	x	x															0.76	0.46	0.11	1.5	0.33	0.63	0	0.06	3.56	0.09	1.65	1.07
			Unknown	Bcin16g01820	255	Bfab16g01820	202	x	x	x															3.08	0.92	0.47	5.07	3.45	2.6	0.47	0.09	1.1	0.7	11.36	2.75
		BcPKS14	Polyketid Synthase	Bcin16g01830	1755	Bfab16g01830	1757	x	x	x	(x)	x	0	x	x	x	x	x	x	(x)	x	x	0	0	0.49	1.11	0.07	1.08	0.96	0.74	0.08	0.15	0.07	0.15	0.1	0.11
			Unknown	Bcin16g01840	276	Bfab16g01840	289	x	x	x															0.07	0	0.44	0.24	0.31	0.21	0	0.13	0	0	0	0.03
			MFS multidrug transporter	Bcin16g01850	123	none	0	0	0	0															0.06	0.27	0	0	0.06	0.08
			c6 transcription protein	Bcin16g01860	592	none	0	0	0	0															4.38	1.72	2.34	10.42	3.46	4.46
			NAD(P)-binding Rossmann-fold containing protein	Bcin16g01870	254	none	0	0	0	0															2.07	1.48	0.77	3.49	7.25	3.01
			O-methyltransferase,	Bcin16g01880	306	none	0	0	0	0															0	0.43	0	0.06	0.57	0.21
			Transcription factor Cys6	Bcin16g01890	777	Bfab16g01890	321	777	777	777															0.04	16.06	0	0.16	0.14	3.28	0	2.05	0.87	0	0	0.59
40	Alkaloid		Transcription factor Cys6	Bcin16g01930	287	Bfab16g01930	287	x	x	x															0.1	0.55	0	0.23	0.11	0.2	0.8	1.03	0.46	0.87	0.07	0.65
		BcDMATS1	dimethylallyl tryptophan synthase	Bcin16g01940	442	Bfab16g01940	117	428	437	437	0	x	0	x	x	(x)	(x)	0	x	x	x	(x)	x	0	0.2	0.28	0	1.66	0.02	0.43	0	0.18	0.3	0	0	0.1
41	Ferrichrome siderophore (Bushley and Turgeon 2010)		abc multidrug transporter protein	Bcin16g03560	1330	Bfab16g03560	1330	x	x	x															37.25	1.11	0.27	1.61	1.3	8.31	5.1	0.98	0.95	33.58	2.91	8.7
		BcNRPS3	nonribosomal peptide synthase	Bcin16g03570	4695	Bfab16g03570	4694	x	x	x	x	x	0	x	x	x	0	x	0	x	x	x	x	x	13.32	0.6	0.28	1.13	2.77	3.62	5.08	1.53	1.15	19.58	8.71	7.21
42	Polyketide		HET-s/LopB domain protein	Bcin16g05000	567	Bfab16g05000	409	545	545	545															10.23	1.49	4.2	1.96	39.27	11.43	5.1	0.2	0.82	3.16	7.16	3.29
			Calcium proton exchanger protein	Bcin16g05010	1391	Bfab16g05010	1380	x	x	x															1.16	0.74	6.54	1.94	1.65	2.4	2.37	0.66	0.09	3.43	1.84	1.68
			Cytochrome P450 monooxygenase	Bcin16g05020	508	Bfab16g05020	508	x	x	x															0.89	2.37	0.79	0.69	3.64	1.68	0.99	0.9	0.5	5.05	1.25	1.74
			Amidohydrolase 2 protein	Bcin16g05030	410	Bfab16g05030	410	x	x	x															0.71	2.36	0.37	0.14	1.99	1.11	0.46	0.64	0.61	45.89	1.08	9.73
		BcPKS16	Polyketide synthase	Bcin16g05040	2575	Bfab16g05040	2575	x	x	x	x	x	0	x	(x)	x	x	x	x	x	x	x	x	0	0.05	0.31	0.02	0.06	0.16	0.12	0.13	0.14	0.08	0.58	0.05	0.2
			Unknown	Bcin16g05050	510	Bfab16g05050	510	x	x	x															0.42	2.12	0.12	0.52	20.49	4.73	0	0.39	0.85	1.16	2.41	0.96
			tat pathway signal sequence protein	Bcin16g05060	539	Bfab16g05060	538	x	x	x															0	1.34	0	0	0.01	0.27	0	0.11	0	0	0	0
