# Supplementary material for: Genome Comparisons between Botrytis fabae and the Closely Related Gray Mold Fungus Botrytis cinerea Reveal Possible Explanations for Their Contrasting Host Ranges
Source: J Fungi (Basel). 2024 Mar 14;10(3):216. doi: 10.3390/jof10030216 (PMC10971195; doi:10.3390/jof10030216)
Supplement: Supplementary file 1 [file jof-10-00216-s001.zip › Table S12.xlsx]

## Sheet: Bfab-Bcin matrix
Table S12: Comparison of proteins secreted by BcB0510 and BfabG12 on Vicia faba leaves (48 h.p.i.)
Annotation ENSEMBL	Bcin Uniprot ID	Significance	P-value	Bfab vs.Bcin	CDIP	Description	References to CDIPs	P-value
Bot01g00640	A0A384J416		0.0870964			Glucose-methanol-choline oxidoreductase
Bot01g00800	A0A384J419		0.229087			Lcc8: Laccase
Bot01g00900	A0A384J439		0.0537032			AB hydrolase-1
Bot01g01190	A0A384J466	+	n.d.	Bcin-spec		Ap3: Aspartyl protease
Bot01g01760	A0A384J4D3		0.020893			Chitinase
Bot01g02320	A0A384J4K6		0.141254			Lysophospholipase
Bot01g02460	A0A384J4M1	+	0.018197	Bfab>Bcin		Exp1: Expansin-like EG45
Bot01g02470	A0A384J4M9	+	n.d.	Bcin-spec		Carboxylic ester hydrolase
Bot01g02690	A0A384J4Q4		0.123027			Serine carboxypeptidase
Bot01g02910	A0A384J4T0	+	0.00724436	Bcin>Bfab		3-Phytase
Bot01g04260	A0A384JPY4	+	n.d.	Bcin-spec		Ser2: L-phosphoserine phosphatase
Bot01g04580	A0A384J5A0		0.141254			Uncharacterized protein
Bot01g05060	A0A384J5E9		0.354813			Aminopeptidase
Bot01g05280	A0A384J5R3		0.275423			Carboxylic ester hydrolase
Bot01g05310	A0A384J5Q6		0.154882		SGP1	SGP1: GPI anchored protein	Song et al. (2021) Nat. Comm. (https://doi.org/10.1038/s41467-021-22660-9)
Bot01g05680	A0A384J685		0.851138			Alpha-1,2-mannosidase
Bot01g05690	A0A384J5Q2	+	0.00154882	Bcin>Bfab		Zn(2)-C6 fungal-type
Bot01g05720	A0A384J5X2		0.281838			Extracellular serine-rich protein
Bot01g06010	A0A384J6C4		0.831764		Crh1	Crh1: Glycosidase	Bi et al. (2021) Nature Comm. (https://doi.org/10.1038/s41467-021-22436-1)
Bot01g06060	A0A384J5W6		0.57544			Uncharacterized protein
Bot01g06210	A0A384J6E3		0.0512861			Carboxypeptidase
Bot01g06450	A0A384J5V2		0.691831			Enol: Enolase
Bot01g06790	A0A384J638		0.371535			Rhamnogalacturonan acetylesterase
Bot01g06900	A0A384J6D7		0.0954993			Purine nucleoside permease
Bot01g07190	A0A384J683	+	0.00275423	Bfab>Bcin		Lcc5: Laccase
Bot01g07200	A0A384J6P9		0.870964			Extracellular serine-rich protein
Bot01g07210	A0A384J620		0.251189			Glycoside hydrolase family 92
Bot01g07230	A0A384J6H9		0.457088			Neutral ceramidase
Bot01g07250	A0A384J688		0.109648			Glycoside hydrolase family 28
Bot01g07330	A0A384J699	+	n.d.	Bcin-spec		PG5: Polygalacturonase
Bot01g07350	A0A384J6H2	+	n.d.	Bfab-spec		Solute-binding protein family 5
Bot01g07530	A0A384J6B7	+	5.12861e-05	Bcin>Bfab		Glycoside hydrolase family 125
Bot01g08070	A0A384J6C3	+	n.d.	Bcin-spec		NADH:ubiquinone oxidoreductas intermediate-associated protein 30
Bot01g08110	A0A384J6S2	+	0.000295121	Bcin>Bfab		Alpha-galactosidase
Bot01g08910	A0A384J709		0.346737			Carbohydrate esterase family 16
Bot01g08970	A0A384J6V7		0.218776			ML-like domain-containing protein
Bot01g09170	A0A384J6Z5	+	n.d.	Bfab-spec		Amino-acid transaminase
Bot01g09390	A0A384J6P0		0.794328			Uncharacterized protein
Bot01g09430	A0A384J7A8	+	0.00977237	Bcin>Bfab		Cutinase
Bot01g09450	A0A384J6U1		0.213796			L-fuconate dehydratase
Bot01g09650	A0A384J7Q3		0.630957			Glucose-6-phosphate dehydrogenase
Bot01g09950	A0A384J776		0.562341			Pyruvate carboxylase
Bot01g10100	A0A384J6Z0		0.60256			Pyruvate kinase
Bot01g10130	A0A384J7F4	+	n.d.	Bfab-spec		Dug2: Protease
Bot01g11040	A0A384J868		0.891251			Alpha-L-rhamnosidase
Bot01g11150	A0A384J7F2		0.0363078			Pectinesterase
Bot01g11160	A0A384J801	+	0.00158489	Bfab>Bcin		Glycoside hydrolase family 28
Bot01g11220	A0A384J809		0.190546			Glycoside hydrolase family 17
Bot01g11290	A0A384J897		0.851138			Glycoside hydrolase family 76
Bot01g11310	A0A384J7H2		0.446684			God2: FAD-binding oxidoreductase
Bot02g00070	A0A384J7V5	+	n.d.	Bcin-spec		Alginate lyase
Bot02g00170	A0A384J8G7		0.74131			Aminopeptidase
Bot02g00210	A0A384J7W9		0.912011			Carboxylic ester hydrolase
Bot02g00220	A0A384J818		0.213796			FAD-binding PCMH-type
Bot02g00280	A0A384J898		0.0281838			FAD-binding PCMH-type
Bot02g00420	A0A384J8J8	+	0.00107152	Bcin>Bfab		Xylan 1,4-beta-xylosidase
Bot02g01420	A0A384J8H1	+	0.0169824	Bfab>Bcin		Alpha-amylase
Bot02g01960	A0A384J8I6		0.691831			Cellulase
Bot02g02040	A0A384J8V9		0.223872			Endo-beta-1,4-glucanase D
Bot02g02120	A0A384J8A3		0.0223872			Tyrosinase copper-binding domain
Bot02g02410	A0A384J8F4		0.954993			Asl1-like glycosyl hydrolase
Bot02g03090	A0A384J9H4		0.0954993			Glycoside hydrolase family 1
Bot02g03860	A0A384J997		0.398107			Carboxylesterase type B
Bot02g03870	A0A384J9D0		0.389045			Uncharacterized protein
Bot02g04220	A0A384J9H1		0.363078			60S ribosomal protein L4 domain
Bot02g04320	A0A384J912		0.0501187			Uncharacterized protein
Bot02g04510	A0A384J952		0.758578			Nitroreductase
Bot02g04550	A0A384J9L3		0.0275423			Glycoside hydrolase family 43
Bot02g04600	A0A384J9N8		0.0380189			Uncharacterized protein
Bot02g04800	A0A384J9L1	+	0.00131826	Bcin>Bfab		Peptidase M14 carboxypeptidase A
Bot02g05140	A0A384J9U0		0.660693			Rpl28: Ribosomal protein
Bot02g05300	A0A384J9R8	+	0.00223872	Bcin>Bfab		Major royal jelly protein
Bot02g05630	A0A384J9V8		0.25704			LysM domain containing protein
Bot02g05860	A0A384JAG7		0.891251			PG6: Polygalacturonase
Bot02g05920	A0A384J9Y3		0.794328			Aconitase (mitochondrial)
Bot02g06400	A0A384JA37		0.199526			Dihydrolipoyl dehydrogenase (EC 1.8.1.4)
Bot02g06910	A0A384J9V5		0.346737			Cell wall glucanase protein
Bot02g06940	A0A384JA21		0.25704			1,3-beta-glucanosyltransferase
Bot02g07070	A0A384JAE0		0.954993			Uncharacterized protein
Bot02g07080	A0A384JA45		0.549541			Glucose-methanol-choline oxidoreductase
Bot02g07100	A0A384J9X2		0.134896			Rhamnogalacturonan acetylesterase protein
Bot02g07520	A0A384JA53		0.141254			Glycoside hydrolase family 26
Bot02g07640	A0A384JA97	+	0.00389045	Bfab>Bcin		Lcc7: Laccase
Bot02g07700	A0A384JA33		0.017378			Arabinan endo-1,5-alpha-L-arabinosidase
Bot02g07770	Q079H3		0.891251		Nep2	Nep2: Necrosis inducing protein	Leisen et al. (2022), PLoS Pathogens (https://doi.org/10.1371/journal.ppat.1010367)
Bot02g08230	A0A384JA88	+	2.34423e-06	Bcin>Bfab		Carboxylic ester hydrolase
Bot02g08380	A0A384JAP8		0.851138			Glycoside hydrolase family 93
Bot02g08590	A0A384JAC8		0.74131			Ap2: Aspartyl protease
Bot02g09380	A0A384JB33	+	n.d.	Bcin-spec		SMP-30/Gluconolactonase/LRE-like region
Bot03g00280	A0A384JAM4	+	0.00323594	Bfab>Bcin		Pectate lyase
Bot03g00290	A0A384JAU5		0.0213796			Calcineurin-like phosphoesterase
Bot03g00340	A0A384JBM6		0.380189			Uncharacterized protein
Bot03g00380	A0A384JAN3	+	0.00194984	Bcin>Bfab		FAD-binding PCMH-type
Bot03g00480	A0A384JAW2	+	0.00912011	Bcin>Bfab	Xyn11A	Xyn11A: Endo-1,4-beta-xylanase	Leisen et al. (2022), PLoS Pathogens (https://doi.org/10.1371/journal.ppat.1010367)
Bot03g00500	A0A384JBC5		0.275423		Spl1	Spl1: Cerato-platanin	Leisen et al. (2022), PLoS Pathogens (https://doi.org/10.1371/journal.ppat.1010367)
Bot03g00890	A0A384JBI2	+	n.d.	Bcin-spec		Extracellular serine-rich protein
Bot03g01440	A0A384JBM4		0.0512861			Mannan endo-1,4-beta-mannosidase
Bot03g01490	A0A384JBR1		0.354813			Bclga1: Lyase
Bot03g01500	A0A384JB47		0.436516			Bcgar2: Nucleotide binding protein
Bot03g01540	A0A384JBE1		0.588844			Uncharacterized protein
Bot03g01580	A0A384JBS0	+	0.0104713	Bfab>Bcin		Carboxylesterase type B
Bot03g01600	A0A384JB99	+	n.d.	Bfab-spec		Glycoside hydrolase
Bot03g01610	A0A384JBK5		0.107152			Endo-1,4-beta-mannosidase (GH26)
Bot03g01680	A0A384JBT3		0.794328			PG4: Polygalacturonase
Bot03g02710	A0A384JBL2	+	0.00186209	Bcin>Bfab		Alpha-galactosidase
Bot03g02760	A0A384JC43		0.0467735			Ap4: Aspartyl protease
Bot03g02970	A0A384JBN7		0.316228			Carbohydrate esterase family 4 protein
Bot03g03360	A0A384JBU2		0.263027			Transaldolase
Bot03g03390	A0A384JBV7		0.676083			Sod1: Superoxide dismutase [Cu-Zn]
Bot03g03480	A0A384JC72		0.912011			Beta-xylanase
Bot03g03610	A0A384JCR8		0.512861			Glycoside hydrolase family 92
Bot03g03630	A0A384JC04	+	0.00512861	Bcin>Bfab	XYG1	XYG1: Glycoside hydrolase family 12 protein	Leisen et al. (2022), PLoS Pathogens (https://doi.org/10.1371/journal.ppat.1010367)
Bot03g03830	A0A384JCI5		0.281838			Pectinesterase
Bot03g03840	A0A384JBX1		0.074131			Glycoside hydrolase family 17
Bot03g04010	A0A384JC16	+	0.000588844	Bfab>Bcin		Cel5A
Bot03g04730	A0A384JD44		0.316228			Carboxylic ester hydrolase
Bot03g05060	A0A384JCR7		0.380189			Pectinesterase catalytic
Bot03g05200	A0A384JCV6		0.380189			Endo-1,3-beta-D-glucosidase
Bot03g05590	A0A384JCQ9	+	n.d.	Bcin-spec		Amidase
Bot03g05600	A0A384JCJ4	+	0.00891251	Bcin>Bfab		Uncharacterized protein
Bot03g05610	A0A384JCM4	+	n.d.	Bfab-spec		Covalently-linked cell wall protein
Bot03g05710	A0A384JCN4	+	n.d.	Bcin-spec		Carbohydrate esterase family 4 protein
Bot03g05720	A0A384JD54	+	0.000812831	Bfab>Bcin		Uncharacterized protein
Bot03g05820	A0A384JD63		0.0295121			Pectate lyase
Bot03g05890	A0A384JDH0		0.851138			Endo-beta-1,4-glucanase D
Bot03g05960	A0A384JD40		0.57544			Bcgst25: Translation elongation factor
Bot03g06600	A0A384JCX1		0.776247			Hsp70 protein
Bot03g07320	A0A384JDH4		0.0933254			Ribonuclease T2
Bot03g07360	A0A384JD13		0.645654			Pectate lyase
Bot03g07730	A0A384JDM9	+	n.d.	Bfab-spec		Tyrosinase
Bot03g07850	A0A384JDN2	+	n.d.	Bcin-spec		Peroxidase
Bot03g08170	A0A384JDW4		0.134896			NAD-dependent epimerase
Bot03g09210	A0A384JEL3		0.812831			Uncharacterized protein
Bot04g00030	A0A384JDQ8		0.030903			glucan 1,4-alpha-glucosidase
Bot04g00470	A0A384JET8		0.125893			Pectate lyase
Bot04g01310	A0A384JEM7		0.0758578			Gpi-anchored cell wall organization protein
Bot04g02060	A0A384JEV9		0.190546			Ap13: Aspartyl protease
Bot04g02310	A0A384JEZ0		0.707946			Purine nucleoside permease
Bot04g02520	A0A384JEL9	+	n.d.	Bfab-spec		CBM1 domain-containing protein
Bot04g03510	A0A384JFC8		0.288403			Uncharacterized protein
Bot04g03620	A0A384JFD4	+	n.d.	Bcin-spec		Ribonuclease T2
Bot04g04190	A0A384JFR0		0.213796		Gs1	Gs1: Glucoamylase	Leisen et al. (2022), PLoS Pathogens (https://doi.org/10.1371/journal.ppat.1010367)
Bot04g04830	A0A384JFE1		0.158489			Aldose 1-epimerase
Bot04g04930	A0A384JFT4		0.0512861			PG3: Polygalacturonase
Bot04g05020	A0A384JFU8		0.645654			FAS1 domain-containing protein
Bot04g05410	A0A384JFK9	+	0.00977237	Bfab>Bcin		Peptide-n4-(N-acetyl-beta-glucosaminyl)asparagine amidase
Bot04g05490	A0A384JFL9	+	n.d.	Bcin-spec		Tat pathway signal sequence protein
Bot04g05580	A0A384JFK8		0.562341			Intradiol ring-cleavage dioxygenases
Bot04g05650	A0A384JG19		0.151356			Cupin type-1 domain-containing protein
Bot04g05960	A0A384JFS0	+	n.d.	Bfab-spec		Serine-threonine rich protein
Bot04g06020	A0A384JFS7		0.0870964			Beta-galactosidase
Bot04g06150	A0A384JGH6		0.501187			Glycoside hydrolase family 76
Bot04g06190	A0A384JFW2	+	n.d.	Bcin-spec		Carboxylic ester hydrolase
Bot04g06250	A0A384JGI9	+	n.d.	Bfab-spec		Alpha-amylase
Bot04g06570	A0A384JGC8		0.776247			5-methyltetrahydropteroyltriglutamate--homocysteine S-methyltransferase
Bot04g06990	A0A384JG44	+	5.49541e-05	Bfab>Bcin		Arabinan endo-1,5-alpha-L-arabinosidase
Bot05g00860	A0A384JGD3	+	n.d.	Bcin-spec		Alpha-carbonic anhydrase
Bot05g01660	A0A384JGQ4		0.977237			Glycoside hydrolase family 5
Bot05g02410	A0A384JGX1		0.549541			Glucose-methanol-choline oxidoreductase
Bot05g02430	A0A384JH09	+	n.d.	Bfab-spec		Prd8: Peroxidase
Bot05g02520	A0A384JHC7		0.301995			Pgx1: Polygalacturonase
Bot05g03390	A0A384JHT4	+	0.0134896	Bfab>Bcin		Glycoside hydrolase family 5
Bot05g03460	A0A384JHN3	+	0.00616595	Bfab>Bcin		Serine aminopeptidase S33
Bot05g03580	A0A384JH96	+	n.d.	Bfab-spec		Aspartic-type endopeptidase
Bot05g04010	A0A384JHW2	+	0.00954993	Bcin>Bfab		SnoaL-like
Bot05g04190	A0A384JHH2		0.18197			AB hydrolase-1
Bot05g04720	A0A384JI98	+	0.0138038	Bfab>Bcin		YjgF-like protein
Bot05g04950	A0A384JID5	+	n.d.	Bfab-spec		Glycoside hydrolase family 28
Bot05g05090	A0A384JHV5		0.025704			1,3-Beta-glucanosyltransferase
Bot05g05160	A0A384JHT3		1			Uncharacterized protein
Bot05g05320	A0A384JHU3		0.18197			Allergen asp f 4 protein
Bot05g05830	A0A384JI11		0.436516			Peptidase S53
Bot05g05900	A0A384JIJ0		1			Ap5: Aspartyl protease
Bot05g05930	A0A384JI24	+	0.000724436	Bfab>Bcin		Carbohydrate-binding module family 18 protein
Bot05g06020	A0A384JI32	+	0.00776247	Bcin>Bfab		Beta-xylanase
Bot05g06510	A0A384JIA3		0.0912011			Glucose-methanol-choline oxidoreductase
Bot05g08130	A0A384JJD3		0.177828			Gylcosyl hydrolase 115
Bot05g08270	A0A384JIQ2		0.017378			FAD-binding PCMH-type
Bot05g08330	A0A384JIR5		0.524807			SGNH hydrolase-type esterase
Bot06g00330	A0A384JJ87		0.147911			Peptidase S53
Bot06g00480	A0A384JJB6		0.323594			Endo-beta-1,4-glucanase D
Bot06g00490	A0A384JJA8		0.0229087			Glycoside hydrolase family 12
Bot06g00580	A0A384JJC7		0.0288403			Glycoside hydrolase family 92
Bot06g00620	A0A384JIZ5	+	0.000251189	Bcin>Bfab		Tpp2: Serine-type endopeptidase
Bot06g01000	A0A384JJ67		0.616595			Spherulin 4-like cell surface protein
Bot06g01580	A0A384JJA0	+	0.000371535	Bcin>Bfab		Beta-glucuronidase
Bot06g01600	A0A384JJU5		0.588844			Glycosyl hydrolase family 43 protein
Bot06g01630	A0A384JJF1		0.0831764			Beta-glucuronidase
Bot06g01930	A0A384JJI6		0.676083			Go1: Glyoxylate oxidase
Bot06g02140	A0A384JJG2	+	0.0017378	Bcin>Bfab		Glycoside hydrolase family 28
Bot06g02430	A0A384JK44	+	n.d.	Bfab-spec		Aminotransferase class I/classII
Bot06g02510	A0A384JJK2		0.134896			Carboxypeptidase
Bot06g03070	A0A384JJP6		0.691831			Peptidase S53
Bot06g03270	A0A384JK50	+	n.d.	Bcin-spec		Cyanovirin-N
Bot06g03920	A0A384JKM8	+	n.d.	Bcin-spec		Carbohydrate esterase family 16 protein
Bot06g04500	A0A384JKB1		0.0954993			Beta-galactosidase
Bot06g04820	A0A384JKB6	+	0.00707946	Bfab>Bcin		Feruloyl esterase
Bot06g04830	A0A384JKY0	+	n.d.	Bfab-spec		Glycoside hydrolase family 5
Bot06g04840	A0A384JKB7	+	0.0030903	Bcin>Bfab		Fibronectin type III-like
Bot06g04850	A0A384JKB3	+	n.d.	Bcin-spec		Glycoside hydrolase family 31
Bot06g05050	A0A384JKR4		0.0389045			CBM20 domain-containing protein
Bot06g05200	A0A384JKT0	+	0.000158489	Bcin>Bfab		Phosphoglycerate mutase-like protein
Bot06g05730	A0A384JKX7	+	n.d.	Bfab-spec		Protein disulfide-isomerase PDI1
Bot06g05980	A0A384JL09		0.177828			Gas1-like protein
Bot06g06040	A0A384JKR5		0.363078			Sun domain-containing protein
Bot06g06090	A0A384JLE3		0.025704			Six-bladed beta-propeller-like protein
Bot06g06350	A0A384JLH2	+	n.d.	Bcin-spec		Nqo1: NAD(P)H dehydrogenase
Bot06g06410	A0A384JL24		0.588844			CBM1 domain-containing protein
Bot06g06580	A0A384JL44	+	6.76083e-07	Bcin>Bfab		Alpha-L-rhamnosidase six-hairpin glycosidase
Bot06g06670	A0A384JL54		0.0524807			Uncharacterized protein
Bot06g07020	A0A384JL31	+	0.00158489	Bfab>Bcin		Carboxylic ester hydrolase
Bot06g07050	A0A384JLD1		0.74131			Endo-beta-1,4-glucanase D
Bot07g00780	A0A384JLH1		0.389045			Uncharacterized protein
Bot07g00890	A0A384JLI1		0.25704			Chitinase
Bot07g01020	A0A384JLU0	+	n.d.	Bfab-spec		Triglyceride lipase
Bot07g01540	A0A384JLV2		0.47863			Translation elongation factor 2
Bot07g01720	A0A384JM34		0.0489779			Peptidase S9 prolyl oligopeptidase catalytic
Bot07g02280	A0A384JMN1	+	n.d.	Bfab-spec		Aspartic-type endopeptidase
Bot07g02610	A0A384JM43		0.125893			6-Phosphogluconate dehydrogenase, decarboxylating
Bot07g02650	A0A384JM52		0.549541			Glycoside hydrolase family 5
Bot07g02730	A0A384JMT3	+	0.00776247	Bfab>Bcin		Pectate lyase superfamily protein
Bot07g02860	A0A384JMI4	+	n.d.	Bfab-spec		Glycoside hydrolase family 25
Bot07g02940	A0A384JMJ6	+	0.00436516	Bfab>Bcin		Kelch repeat-containing protein
Bot07g02980	A0A384JMV4		0.57544			NADH:flavin oxidoreductase/NADH oxidase
Bot07g03080	A0A384JMA4		0.537032			Aminopeptidase
Bot07g03280	A0A384JMF9	+	0.00588844	Bcin>Bfab		Carbohydrate esterase family 16 protein
Bot07g03770	A0A384JMJ1		0.131826			GH16 carbohydrate hydrolase
Bot07g04000	A0A384JML6		0.60256			Glycoside hydrolase family 92
Bot07g04070	A0A384JMV9	+	n.d.	Bfab-spec		Oxidoreductase
Bot07g04290	A0A384JN16	+	0.000123027	Bcin>Bfab		3-Phytase
Bot07g04350	A0A384JMS0		0.0537032			Sphingomyelin phosphodiesterase
Bot07g04370	A0A384JMZ5		0.363078			Tail specific protease
Bot07g04770	A0A384JN74		0.323594			PA14 domain-containing protein
Bot07g04810	A0A384JMW2		0.891251			Beta-hexosaminidase
Bot07g04870	A0A384JN58		0.245471		Crh4	Crh4: Glycosidase	Liang et al. (2024), Plant Cell Environ 47: 354 (doi: 10.1111/pce.14740)
Bot07g05140	A0A384JNL7	+	n.d.	Bcin-spec		Hsp60: Heat shock protein
Bot07g05440	A0A384JNF6		0.363078			Glycoside hydrolase subgroup catalytic core protein
Bot07g06000	A0A384JNC8	+	n.d.	Bcin-spec		Six-bladed beta-propeller-like protein
Bot07g06480	A0A384JNU4		0.0190546			Carbohydrate esterase family 5 protein
Bot07g06590	A0A384JP90		0.269153			Nuclease s1 protein
Bot07g06600	A0A384JNI4	+	n.d.	Bfab-spec		Uncharacterized protein
Bot07g06780	A0A384JPB1		0.123027			Lcc9: Laccase
Bot07g06950	A0A384JNW8	+	n.d.	Bcin-spec		Inosine/uridine-preferring nucleoside hydrolase
Bot07g07080	A0A384JNQ1		0.0870964			Uncharacterized protein
Bot08g00020	A0A384JNZ3	+	0.0154882	Bfab>Bcin		Secreted protein
Bot08g00060	A0A384JPF7	+	n.d.	Bcin-spec		Beta-xylosidase Concanavalin A-like
Bot08g00280	A0A384JP50		0.0660693			Carboxypeptidase
Bot08g00400	A0A384JPF6	+	0.000645654	Bcin>Bfab	CDI2	CDI2: Cell death-inducing protein	Seifbarghi et al. (2020) doi: 10.3389/fpls.2020.01021
Bot08g00720	A0A384JPB4	+	0.00794328	Bcin>Bfab		Ap14: Aspartyl protease
Bot08g00890	A0A384JPB5	+	0.00138038	Bcin>Bfab		Alpha-L-arabinofuranosidase
Bot08g00910	A0A384JPR1		0.467735			Bgl2
Bot08g00950	A0A384JP29		0.169824			Carbohydrate esterase family 16 protein
Bot08g01010	A0A384JPS0	+	n.d.	Bfab-spec		CND01770-like protein
Bot08g01020	A0A384JP20		0.537032			Peptidase S53
Bot08g01550	A0A384JPZ1	+	n.d.	Bcin-spec		Helix-turn-helix-domain containing protein type protein
Bot08g01580	A0A384JPA6	+	n.d.	Bcin-spec		Carbohydrate esterase family 5 protein
Bot08g01900	A0A384JPL9		0.229087			Chitinase
Bot08g02080	A0A384JPJ7		0.831764			ABM domain-containing protein
Bot08g02110	A0A384JQ75		0.0380189			CBM1 domain-containing protein
Bot08g02120	A0A384JPI5		0.0194984			Alpha-galactosidase
Bot08g02390	A0A384JQ98		0.0416869			Serine peptidase
Bot08g02970	A0A384JQ57	+	3.71535e-06	Bcin>Bfab		Pme1: Pectinesterase
Bot08g02990	A0A384JPY4		0.151356			Serine-type endopeptidase
Bot08g03320	A0A384JQ70		0.354813			Yeast cell wall synthesis Kre9/Knh1-like
Bot08g03760	A0A384JQB9	+	0.0112202	Bcin>Bfab		Ap10: Aspartyl protease
Bot08g03820	A0A384JQ79	+	0.000457088	Bfab>Bcin		Pectate lyase
Bot08g04590	A0A384JQR0	+	0.00645654	Bcin>Bfab		Six-hairpin glycosidase-like protein
Bot08g04910	A0A384JQL0		0.398107			Oxidoreductase
Bot08g05000	A0A384JQU1	+	0.0186209	Bcin>Bfab		Quercetin 2,3-dioxygenase
Bot08g05220	A0A384JRB3		0.707946			Triosephosphate isomerase
Bot08g05280	A0A384JQZ0	+	n.d.	Bcin-spec		Metallo-beta-lactamase
Bot08g05630	A0A384JRC7		0.933254			Cyanate hydratase
Bot08g05870	A0A384JR39	+	0.0177828	Bcin>Bfab		Glycosyl hydrolase family 95
Bot08g06110	A0A384JRH9	+	n.d.	Bcin-spec		Mannan endo-1,6-alpha-mannosidase
Bot08g06160	A0A384JR71		0.60256			Arabinogalactan endo-beta-1,4-galactanase
Bot08g06830	A0A384JRE8	+	0.0125893	Bfab>Bcin		Polysaccharide hydrolase
Bot08g07050	A0A384JRF8		0.186209			Chitinase
Bot08g07090	A0A384JR92	+	n.d.	Bcin-spec		Uncharacterized protein
Bot09g00190	A0A384JRL2		0.128825			Mannan endo-1,6-alpha-mannosidase
Bot09g00200	A0A384JRK6		0.537032			Glycoside hydrolase family 17
Bot09g00220	A0A384JS03	+	n.d.	Bcin-spec		Uncharacterized protein
Bot09g00450	A0A384JRL7	+	n.d.	Bcin-spec		Carboxylic ester hydrolase
Bot09g00460	A0A384JRP2		0.346737			Uncharacterized protein
Bot09g00480	A0A384JRK0		0.933254			Amine flavin-containing superfamily protein
Bot09g00620	A0A384JRF6		0.0616595			NodB homology
Bot09g00770	A0A384JRI3	+	0.000131826	Bcin>Bfab		SMP-30/Gluconolactonase/LRE-like region
Bot09g01040	A0A384JRL3	+	0.00831764	Bcin>Bfab		Asparaginase
Bot09g01110	A0A384JSA4		0.251189			Glucanase
Bot09g01150	A0A384JRL8		0.239883			CBM1 domain-containing protein
Bot09g01190	A0A384JSB3		0.30903			Peptidase S53
Bot09g01800	A0A384JRT5		0.0812831		Xyl1	Xyl1: SGNH hydrolase-type esterase	Leisen et al. (2022), PLoS Pathogens (https://doi.org/10.1371/journal.ppat.1010367)
Bot09g02270	A0A384JS64		0.831764			Extracellular membrane protein CFEM
Bot09g02350	A0A384JS74		0.707946			Carboxypeptidase
Bot09g02640	A0A384JSB2		0.851138			Beta-glucosidase
Bot09g02890	A0A384JSE2		0.162181			Malate dehydrogenase protein
Bot09g02930	A0A384JS79		0.20893			Ap1: Aspartyl protease
Bot09g03430	A0A384JSI4		0.0457088			Amidase
Bot09g03490	A0A384JSF5	+	n.d.	Bcin-spec		Carbohydrate hydrolase (GH16)
Bot09g03810	A0A384JSH5		0.154882			Dienelactone hydrolase
Bot09g03930	A0A384JSU3		0.57544			Prx8: Thioredoxin peroxidase
Bot09g04020	A0A384JSK7		1			SGNH hydrolase-type esterase
Bot09g04320	A0A384JTD7	+	n.d.	Bfab-spec		Agmatinase 1 (hydrolase)
Bot09g04410	A0A384JTE5	+	n.d.	Bfab-spec		F5/8 type C domain-containing protein
Bot09g04430	A0A384JSR5		0.870964			Carboxylic ester hydrolase
Bot09g04440	A0A384JTC1	+	n.d.	Bcin-spec		Alpha-L-arabinofuranosidase
Bot09g04490	A0A384JTF2	+	0.00144544	Bcin>Bfab		Alpha,alpha-trehalase
Bot09g04570	A0A384JTG0	+	n.d.	Bcin-spec		Glucose-methanol-choline oxidoreductase
Bot09g04790	A0A384JT15		0.0316228			Glycoside hydrolase family 39
Bot09g05250	A0A384JT33		0.0380189			Ubiquitin 3 binding protein But2
Bot09g05470	A0A384JTG2	+	0.00060256	Bcin>Bfab		Carboxylic ester hydrolase
Bot09g05590	A0A384JTU5		0.812831			Rpl10: Ribosomal protein
Bot09g05630	A0A384JT75		0.977237			Aminopeptidase
Bot09g05740	A0A384JT96		0.630957			Carboxylic ester hydrolase
Bot09g05760	A0A384JTH0		0.331131			Elongation factor 1-alpha
Bot09g06880	A0A384JTM0		0.389045			Carboxylic ester hydrolase
Bot09g06990	A0A384JTN7	+	8.70964e-05	Bcin>Bfab		beta-glucosidase
Bot09g07010	A0A384JTW6	+	0.000281838	Bcin>Bfab		Glutathione hydrolase
Bot09g07110	A0A384JTQ1		0.616595			Glycoside hydrolase family 43
Bot10g00300	A0A384JTW8		0.0933254			HSP90-like ATPase domain-containing protein
Bot10g00310	A0A384JTU1		0.831764			Pectate lyase superfamily protein
Bot10g01020	A0A384JU78		0.47863		Plp1	Plp1: Cell-death inducing protein	Leisen et al. (2022), PLoS Pathogens (https://doi.org/10.1371/journal.ppat.1010367)
Bot10g01080	A0A384JV15		0.954993			Glucose-methanol-choline oxidoreductase
Bot10g01510	A0A384JUF8		0.0851138			Sexual development protein
Bot10g01610	A0A384JUG8	+	0.0020893	Bcin>Bfab		Glycoside hydrolase family 43
Bot10g01840	A0A384JUA7	+	n.d.	Bfab-spec		AB hydrolase-1
Bot10g01890	A0A384JUH2		0.234423			Peptidase S53
Bot10g02180	A0A384JUL4		0.794328		CFEM1	CFEM1: Extracellular membrane protein CFEM	Zhu et al. (2017) Front. Microbiol.( doi: 10.3389/fmicb.2017.01807)
Bot10g02290	A0A384JUH9		0.912011			Ape4: Aminopeptidase
Bot10g02530	A0A384JVF6		0.588844			Ser1: Serine endopeptidase
Bot10g02650	A0A384JUP3		0.204174			Glycoside hydrolase family 1
Bot10g03770	A0A384JUU9		0.870964			Phosphatase
Bot10g04320	A0A384JUZ5		0.616595			Carboxypeptidase
Bot10g04330	A0A384JV47		0.436516			Carboxypeptidase S1
Bot10g05010	A0A384JVA5	+	0.0151356	Bcin>Bfab		Glycoside hydrolase family 28
Bot10g05310	A0A384JWA1		0.42658			3-Isopropylmalate dehydrogenase
Bot10g05430	A0A384JVB5		0.630957			Rps3: Ribosomal protein
Bot10g05590	A0A384JVD0		0.549541			Fibronectin type III-like
Bot10g05620	A0A384JVI1		0.831764			Pectate lyase
Bot10g05630	A0A384JVM0		0.645654			Beta-glucosidase
Bot10g05700	A0A384JVE6		0.25704			AA1-like domain-containing protein
Bot10g05710	A0A384JVJ1		0.128825			Glycoside hydrolase family 32
Bot10g06130	A0A384JVT2	+	0.00323594	Bcin>Bfab		Glycoside hydrolase family 28
Bot11g00010	A0A384JVL3	+	n.d.	Bcin-spec		Glycoside hydrolase family 1
Bot11g00020	A0A384JWJ9	+	n.d.	Bcin-spec		Carboxylic ester hydrolase
Bot11g00300	A0A384JVP2	+	n.d.	Bfab-spec		Lysine-specific metallo-endopeptidase
Bot11g00400	A0A384JVY8		0.691831			Carboxylic ester hydrolase
Bot11g01090	A0A384JW69	+	0.0112202	Bcin>Bfab		Uncharacterized protein
Bot11g01310	A0A384JW87	+	0.000562341	Bcin>Bfab		Uncharacterized protein
Bot11g01370	A0A384JWT2		0.724436			Pectate lyase superfamily protein
Bot11g01430	A0A384JWT9		0.0363078			Arabinogalactan endo-beta-1,4-galactanase
Bot11g02180	A0A384JWG6	+	0.000251189	Bfab>Bcin		Beta-galactosidase
Bot11g02490	A0A384K0X0		0.588844			Zn(2)-C6 fungal transcription factor
Bot11g02900	A0A384JWJ3	+	0.00331131	Bcin>Bfab		Peptidase S1
Bot11g03220	A0A384JWQ3	+	n.d.	Bfab-spec		Siderophore biosynthesis lipase esterase
Bot11g04800	A0A384JY64		0.630957			Carbohydrate esterase family 4 protein
Bot11g05160	A0A384JXH5		0.851138			Adenosylhomocysteinase
Bot11g06120	A0A384JXV2	+	n.d.	Bcin-spec		FAD-binding PCMH-type
Bot11g06400	A0A384JYE0	+	0.00288403	Bcin>Bfab		Uncharacterized protein
Bot11g06440	A0A384JXX4		0.030903			Alpha-glucosidase
Bot11g06450	A0A384JXQ3	+	0.0042658	Bfab>Bcin		Catalase
Bot12g00090	A0A384JXV5		0.40738		Xyl2	Endo-1,4-beta-xylanase	Wang et al. (2023), The plant journal (doi: 10.1111/tpj.16593)
Bot12g00180	A0A384JXW7		0.489779			Ap9: Aspartyl protease
Bot12g00300	A0A384JXY8		0.223872			Beta-galactosidase
Bot12g00380	A0A384JY49		0.074131			DUF1524 containing protein
Bot12g00950	A0A384JY56		0.25704			Mannan endo-1,4-beta-mannosidase
Bot12g01100	A0A384JYB5	+	0.00380189	Bcin>Bfab		Glycoside hydrolase family 28
Bot12g01270	A0A384JY62		0.524807			Peptidase A1
Bot12g01360	A0A384JY73		0.186209			Peptidylprolyl isomerase
Bot12g01520	A0A384JYF7	+	n.d.	Bfab-spec		Go2: Glyoxal oxidase
Bot12g02040	A0A384JYE3		0.57544			Ap8: Aspartyl protease
Bot12g02190	A0A384JYH8	+	0.00758578	Bcin>Bfab		Carboxylic ester hydrolase
Bot12g02830	A0A384JYN2		0.128825			Fibronectin type III-like
Bot12g02910	A0A384JZC8		0.239883			Glucose-methanol-choline oxidoreductase
Bot12g03390	A0A384JZ17	+	0.00676083	Bfab>Bcin		Glucoamylase
Bot12g03520	A0A384JZ55	+	0.000128825	Bcin>Bfab		Six-bladed beta-propeller-like protein
Bot12g03690	A0A384JZ67	+	0.00288403	Bcin>Bfab		3-Carboxymuconate cyclase protein
Bot12g04530	A0A384JZU9		0.234423			Glycoside hydrolase family 28
Bot12g04640	A0A384JZ89		0.74131			FAD-binding PCMH-type
Bot12g05550	A0A384JZJ1		0.630957			Aminotransferase class I/classII
Bot12g05700	A0A384JZT6		0.0645654			Cell wall glycosyl hydrolase protein
Bot12g06120	A0A384JZW3		0.0295121			Glycoside hydrolase 131
Bot12g06300	A0A384JZY2	+	4.57088e-06	Bcin>Bfab		Neutral protease 2
Bot12g06330	A0A384K008		0.0512861			Protein Rds1
Bot12g06360	A0A384K0E9		0.74131			Carboxylesterase type B
Bot12g06590	A0A384JZV4	+	0.00074131	Bfab>Bcin		Glycoside hydrolase family 5
Bot12g06630	A0A384JZY8		0.281838			Cellulase
Bot12g06770	A0A384K032	+	n.d.	Bcin-spec		Six-bladed beta-propeller-like protein
Bot13g00050	A0A384K0U8	+	2.23872e-06	Bcin>Bfab		Uncharacterized protein
Bot13g00300	A0A384K094		0.588844			Uncharacterized protein
Bot13g00380	A0A384K013		0.0524807			Uncharacterized protein
Bot13g00960	A0A384K0D3		0.489779			Endoplasmic reticulum chaperone BiP
Bot13g02010	A0A384K0K8	+	0.0141254	Bfab>Bcin		Extracellular serine-rich protein
Bot13g02100	A0A384K0L8		0.190546			Glucanase
Bot13g02320	A0A384K0P9		0.42658			Xyloglucanase
Bot13g02330	A0A384K190		0.446684			1,3-beta-glucanosyltransferase
Bot13g02640	A0A384K1M5		0.30903			Glycoside hydrolase family 28
Bot13g02960	A0A384K0Z4	+	0.000229087	Bcin>Bfab		Peptidase M14 carboxypeptidase A
Bot13g03410	A0A384K112		0.331131			Uncharacterized protein
Bot13g03680	A0A384K121	+	0.00165959	Bcin>Bfab		Peroxidase
Bot13g03950	A0A384K194		0.691831			Alpha-L-arabinofuranosidase
Bot13g04440	A0A384K245		0.645654			Glycoside hydrolase family 78
Bot13g04850	A0A384K1D6		0.0363078			Glycoside hydrolase family 78
Bot13g05110	A0A384K1G5		0.891251			Alpha-amylase
Bot13g05760	A0A384K289		0.616595			Cutinase
Bot13g05770	A0A384K1P5	+	n.d.	Bcin-spec		Glutaminase protein
Bot13g05810	A0A384K1P6		0.616595			Aldehyde dehydrogenase
Bot13g05870	A0A384K1Q5	+	n.d.	Bfab-spec		Glucose-methanol-choline oxidoreductase
Bot14g00610	A0A384K1Y8	+	0.0057544	Bcin>Bfab	PG2	PG2: Polygalacturonase	Leisen et al. (2022), PLoS Pathogens (https://doi.org/10.1371/journal.ppat.1010367)
Bot14g00650	A0A384K1X9		0.630957			Probable alpha/beta-glucosidase agdC
Bot14g00760	A0A384K252	+	0.00199526	Bcin>Bfab		Survival protein SurE-like phosphatase/nucleotidase
Bot14g00810	A0A384K202		0.371535			Phytase-like
Bot14g00830	A0A384K240		0.524807			alanine-glyoxylate transaminase
Bot14g00850	A0A384K208		0.549541		PG1	PG1: Polygalacturonase	Leisen et al. (2022), PLoS Pathogens (https://doi.org/10.1371/journal.ppat.1010367)
Bot14g00860	A0A384K263		0.0758578			Pectinesterase catalytic
Bot14g01200	A0A384K298		0.0933254		Hip1	Hip1: Hypersensitive response-inducing protein	Jeblick et al. (2023), Plant Physiology 191:125-141 (doi: 10.1093/plphys/kiac476)
Bot14g01630	A0A384K2A9		0.223872			Pectate lyase
Bot14g01690	A0A384K2E4		0.331131			CBM1 domain containing protein
Bot14g01700	A0A384K2B9		0.114815			Glucanase
Bot14g01980	A0A384K2H3		0.389045			Transketolase
Bot14g02510	A0A384K2R9	+	n.d.	Bcin-spec		Lcc2: Laccase
Bot14g03170	A0A384K3M9	+	2.29087e-05	Bfab>Bcin		Amidohydrolase-related
Bot14g03430	A0A384K2Z0		0.0245471			Pectate lyase
Bot14g03970	A0A384K330		0.691831			BcGltr1: 1,3-beta-glucanosyltransferase
Bot14g04180	A0A384K375		0.851138			L-rhamnonate dehydratase
Bot14g04560	A0A384K3B2	+	0.00389045	Bcin>Bfab		Lysophospholipase a protein
Bot14g04580	A0A384K386		0.346737			Oxidoreductase
Bot14g05500	A0A384K3P1		0.0245471			God1: FAD oxidoreductase
Bot14g05510	A0A384K3K2	+	0.00120226	Bcin>Bfab		Alpha-L-arabinofuranosidase
Bot14g05570	A0A384K3L4	+	0.0017378	Bfab>Bcin		Tyrosinase copper-binding
Bot15g00100	A0A384K3L1	+	0.0030903	Bcin>Bfab	IEB1	IEB1: Cell death inducing protein	Leisen et al. (2022), PLoS Pathogens (https://doi.org/10.1371/journal.ppat.1010367)
Bot15g00130	A0A384K3S7		0.371535			Carbohydrate esterase family 5 protein
Bot15g00510	A0A384K3S5		0.301995			Cytidine deaminase
Bot15g00520	A0A384K4A6		0.446684			Uncharacterized protein
Bot15g01030	A0A384K444	+	7.4131e-06	Bcin>Bfab		Carboxylic ester hydrolase
Bot15g01050	A0A384K4G2		0.218776			Peptide hydrolase
Bot15g01170	A0A384K3Z8		0.467735			CBM1 domain containing protein
Bot15g01600	A0A384K474	+	0.0025704	Bcin>Bfab		Endo-1,4-beta-xylanase
Bot15g02120	A0A384K4A5		0.316228			Glyceraldehyde-3-phosphate dehydrogenase
Bot15g02380	A0A384K569		0.912011			Acp1: Acyl carrier protein
Bot15g02440	A0A384K4E3		0.676083			CBM1 domain containing protein
Bot15g03070	A0A384K4T0		0.74131			Carbohydrate hydrolase (GH16)
Bot15g03080	A0A384K4M7	+	0.00169824	Bcin>Bfab		CutA: Cutinase A
Bot15g03140	A0A384K4U6		0.891251			Endo-beta-1,4-glucanase D
Bot15g03150	A0A384K4U0		0.147911			Peptidase S53
Bot15g03320	A0A384K4Q0		0.112202			Acid phosphatase
Bot15g03470	A0A384K4Q7		0.489779			Phosphatidylglycerol/-inositol transfer protein
Bot15g04670	A0A384K566		0.0954993			Ser8: Serine-type endopeptidase
Bot15g04970	A0A384K5G0		0.812831			Pgi1: Glucose-6-phosphate isomerase
Bot15g05030	A0A384K5D8		0.0269153			Glycoside hydrolase family 28
Bot15g05080	A0A384K5E2	+	n.d.	Bcin-spec		1,3-beta-glucanosyltransferase
Bot15g05260	A0A384K5L9		0.691831			Mannan endo-1,6-alpha-mannosidase
Bot15g05510	A0A384K6D4		0.0338844			Carboxylic ester hydrolase
Bot15g05580	A0A384K5J7		0.47863			FAD-binding PCMH-type
Bot15g05630	A0A384K5S0	+	n.d.	Bfab-spec		3-beta hydroxysteroid dehydrogenase/isomerase
Bot15g05700	A0A384K5S8	+	n.d.	Bcin-spec		Carboxylic ester hydrolase
Bot16g00010	A0A384K5M0	+	n.d.	Bcin-spec		SsuA/THI5-like
Bot16g00930	A0A384K613		0.398107			Uncharacterized protein (CND3)
Bot16g01590	A0A384K693		0.20893			Chitinase
Bot16g02130	A0A384K7A9	+	0.000316228	Bcin>Bfab		Carboxylic ester hydrolase
Bot16g02490	A0A384K6L8		0.251189			AB hydrolase-1
Bot16g02560	A0A384K6N4		0.0870964			Glutaminase protein
Bot16g02770	A0A384K6Q5		0.0870964			Deuterolysin metalloprotease
Bot16g02790	A0A384K7K0		0.11749			Uncharacterized protein
Bot16g02850	A0A384K6R3	+	n.d.	Bcin-spec		FAD-binding PCMH-type
Bot16g03020	A0A384K6U5		0.446684			Glycoside hydrolase family 5
Bot16g03510	A0A384K733		0.323594			Uncharacterized protein
Bot16g03950	A0A384K780		0.0323594			Glucanase
Bot16g03980	A0A384K791		0.0323594			Glycoside hydrolase family 1
Bot16g03990	A0A384K7B2		0.288403			Twin-arginine translocation pathway signal protein
Bot16g04050	A0A384K7A2		0.691831			Glutamate dehydrogenase
Bot16g04150	A0A384K7G7		0.0851138			Peptidase A1
Bot16g04210	A0A384K7B8		0.0346737			Ldl1: Ferric iron binding oxidoreductase
Bot16g04640	A0A384K7X4		0.549541			Fdh1: Formate dehydrogenase
Bot16g04990	A0A384K7Q4		0.301995			Carbohydrate-binding-like protein
Bot16g05195	A0A384K7R1	+	0.000245471	Bfab>Bcin		Phosphatidylethanolamine-binding protein
